# Supplementary material
Source: PubMed Central journal article supplement (PMC2543057)

Supporting Information, Part C

**Small-Molecule Inhibitors of Protein Geranylgeranyltransferase Type I**

Sabrina Castellano, Hannah D. G. Fiji, Sape S. Kinderman, Masaru Watanabe,<sup>1</sup> Pablo de Leon,  
Fuyuhiko Tamanoi,<sup>1</sup> Ohyun Kwon\*

*Department of Chemistry and Biochemistry, Department of Microbiology, Immunology and Molecular Genetics,  
Jonsson Comprehensive Cancer Center and Molecular Biology Institute, University of California, Los Angeles,  
607 Charles E. Young Drive East, Los Angeles, CA 90095-1569*  
[ohyun@chem.ucla.edu](mailto:ohyun@chem.ucla.edu)

**Contents**

|                            |      |
|----------------------------|------|
| Spectral Data for Table 3  | S74  |
| Spectral Data for Table 4  | S114 |
| Spectral Data for Table 5  | S124 |
| Spectral Data for Table 9  | S159 |
| Spectral Data for Table 10 | S168 |
| Spectral Data for Table 11 | S197 |

---

<sup>1</sup> Department of Microbiology, Immunology and Molecular Genetics

# Spectral Data Table 3

## 2-Phenyl-1-tosyl-2,5-dihydro-1H-pyrrole-3-carboxylic acid (A01C01)

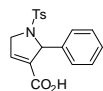

C<sub>19</sub>H<sub>17</sub>NO<sub>4</sub>S  
 Exact Mass: 343.09  
 Mol. Wt.: 343.4

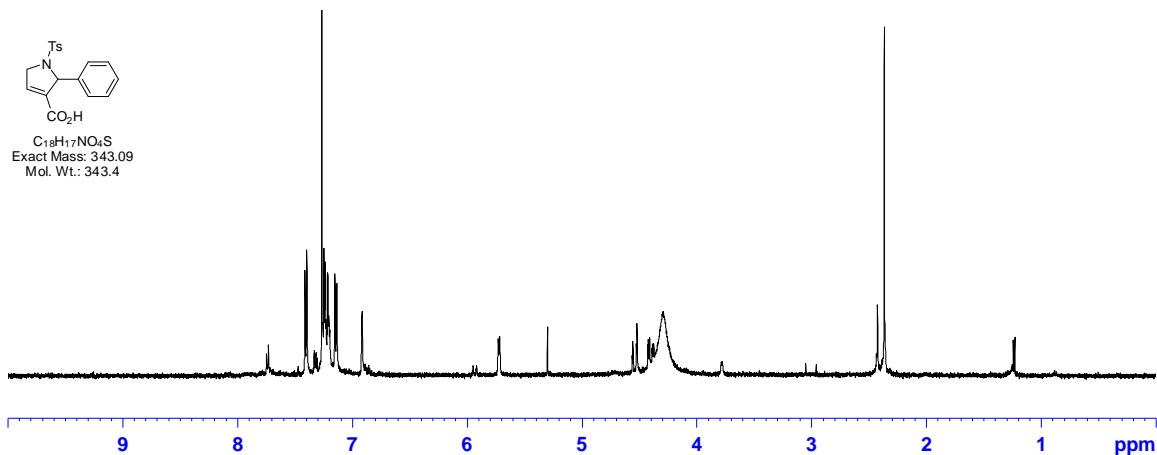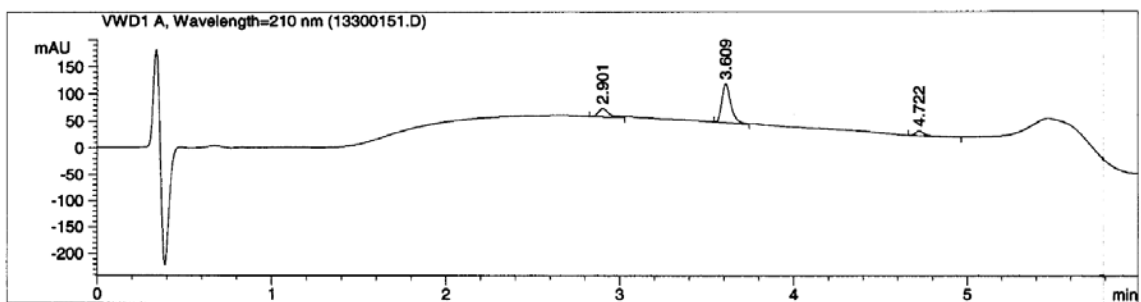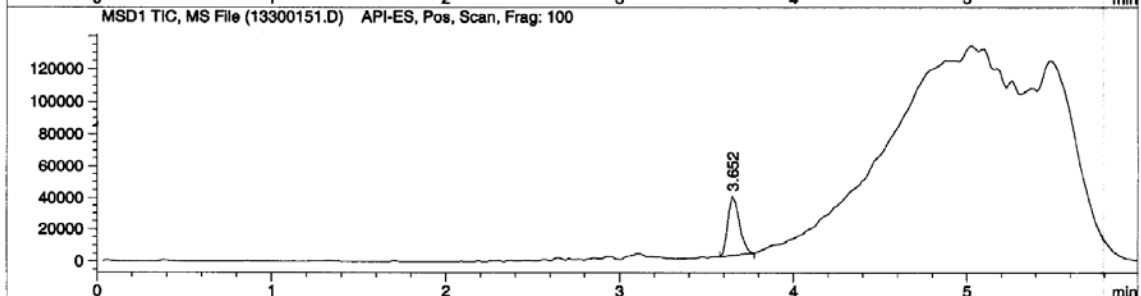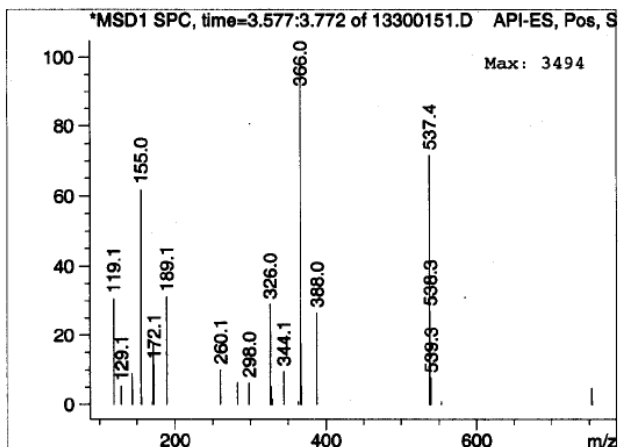

**2-(p-Tolyl)-1-tosyl-2,5-dihydro-1H-pyrrole-3-carboxylic acid (A01C02)**

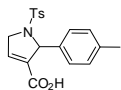

C<sub>19</sub>H<sub>19</sub>NO<sub>4</sub>S  
 Exact Mass: 357.1  
 Mol. Wt.: 357.42

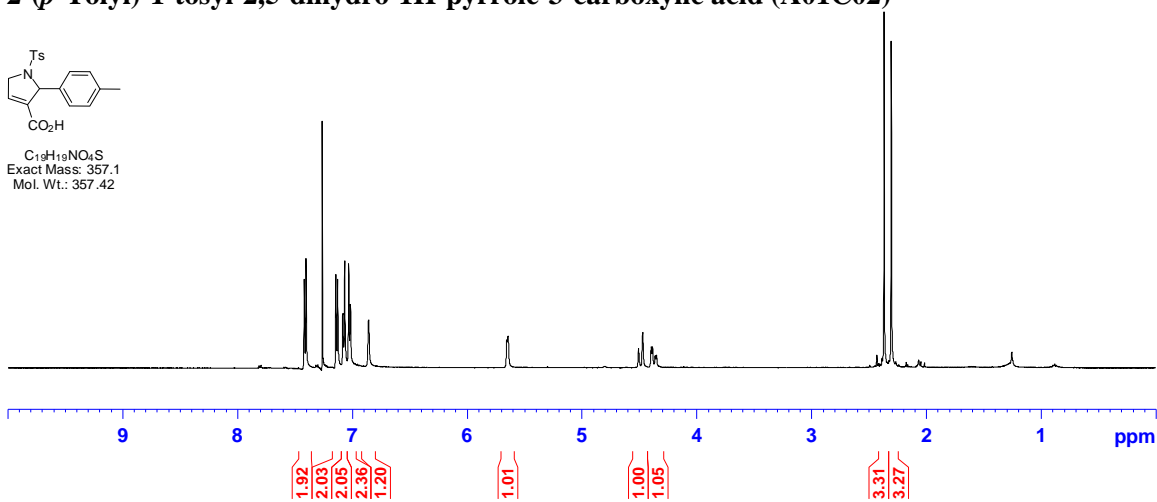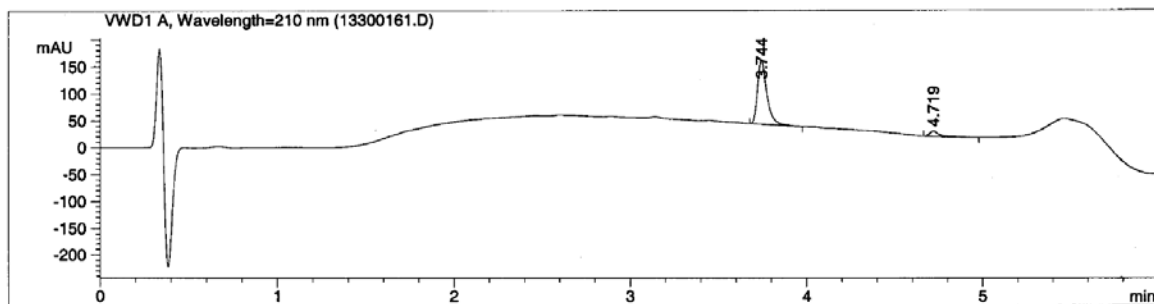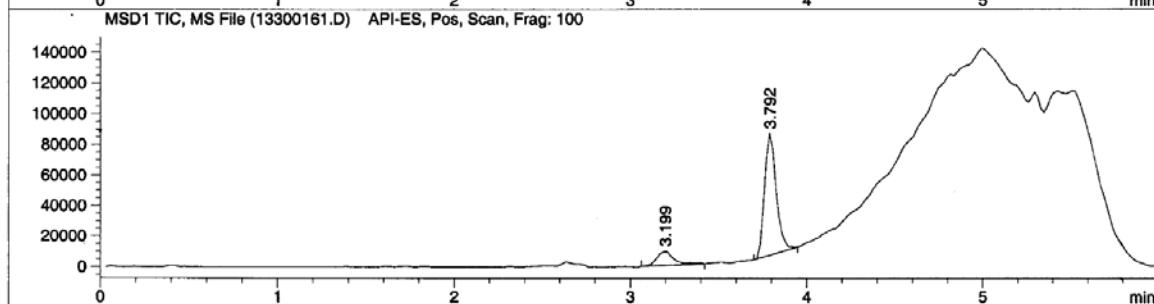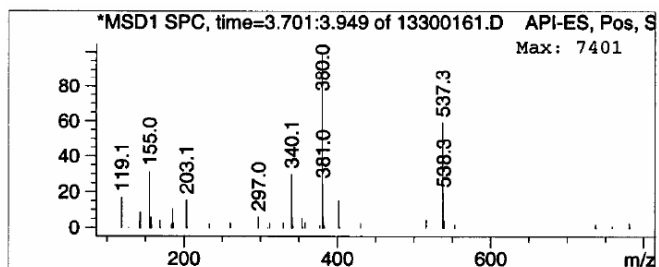

**2-(4-Ethylphenyl)-1-tosyl-2,5-dihydro-1H-pyrrole-3-carboxylic acid (A01C03)**

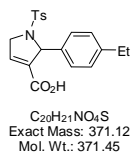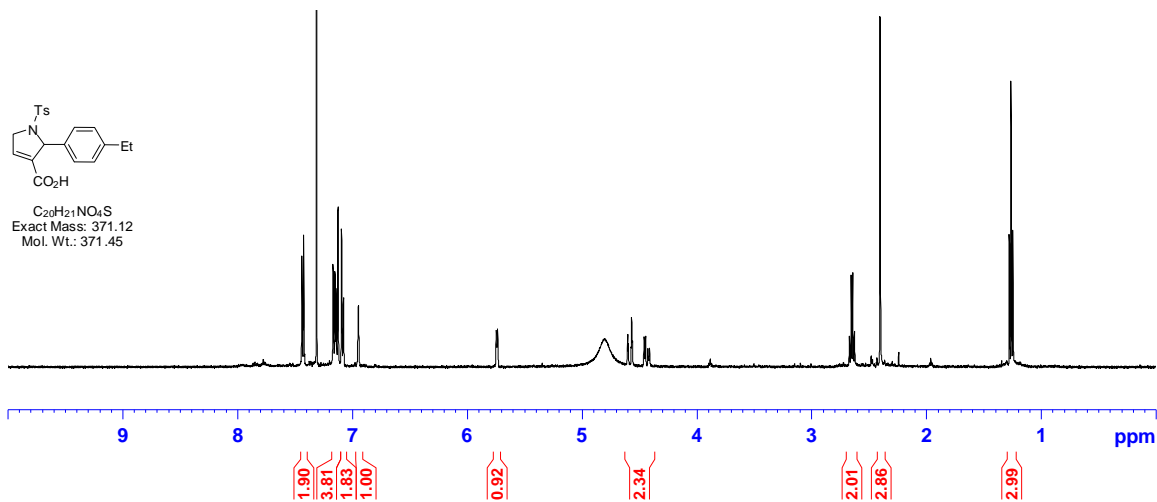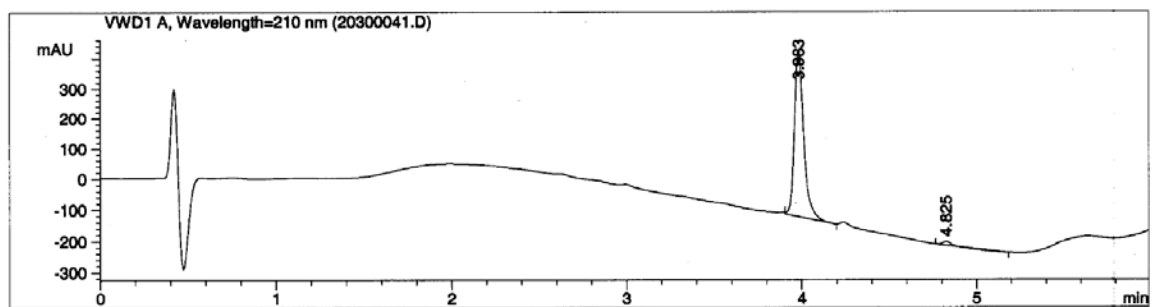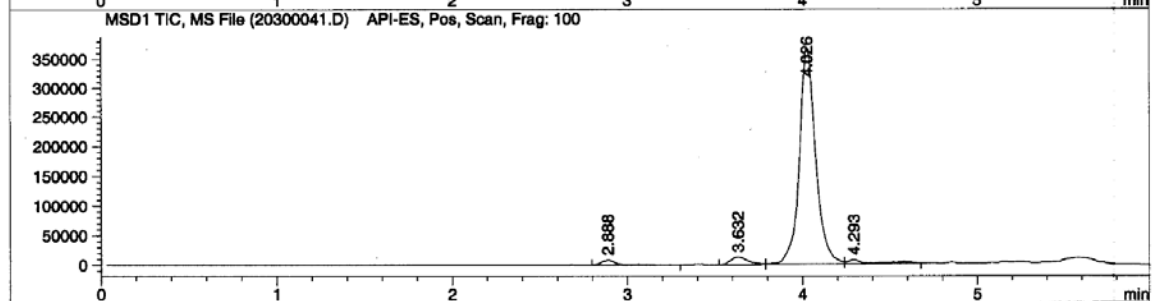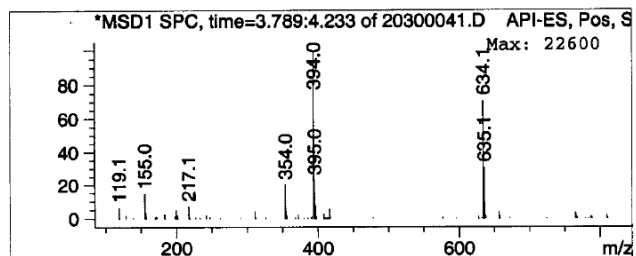



# 2-(4-Methoxyphenyl)-1-tosyl-2,5-dihydro-1H-pyrrole-3-carboxylic acid (A01C04)

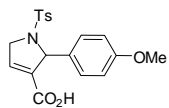

Chemical Formula: C<sub>19</sub>H<sub>19</sub>NO<sub>5</sub>S  
Exact Mass: 373.10  
Molecular Weight: 373.42

Not included

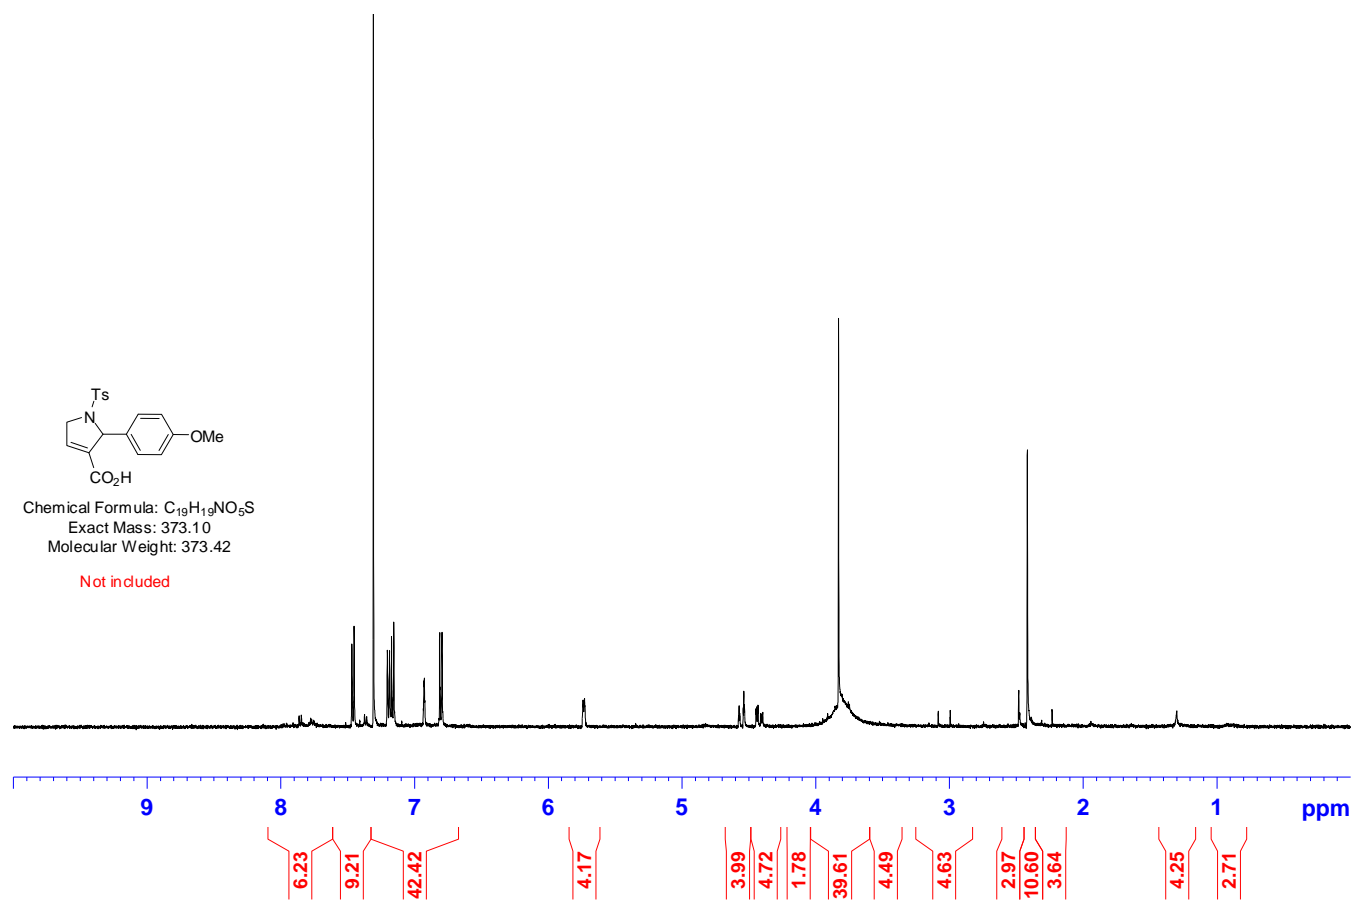

# 2-(4-Ethoxyphenyl)-1-tosyl-2,5-dihydro-1H-pyrrole-3-carboxylic acid (A01C05)

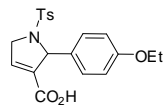

Chemical Formula: C<sub>20</sub>H<sub>21</sub>NO<sub>5</sub>S

Exact Mass: 387.11

Molecular Weight: 387.45

Not included

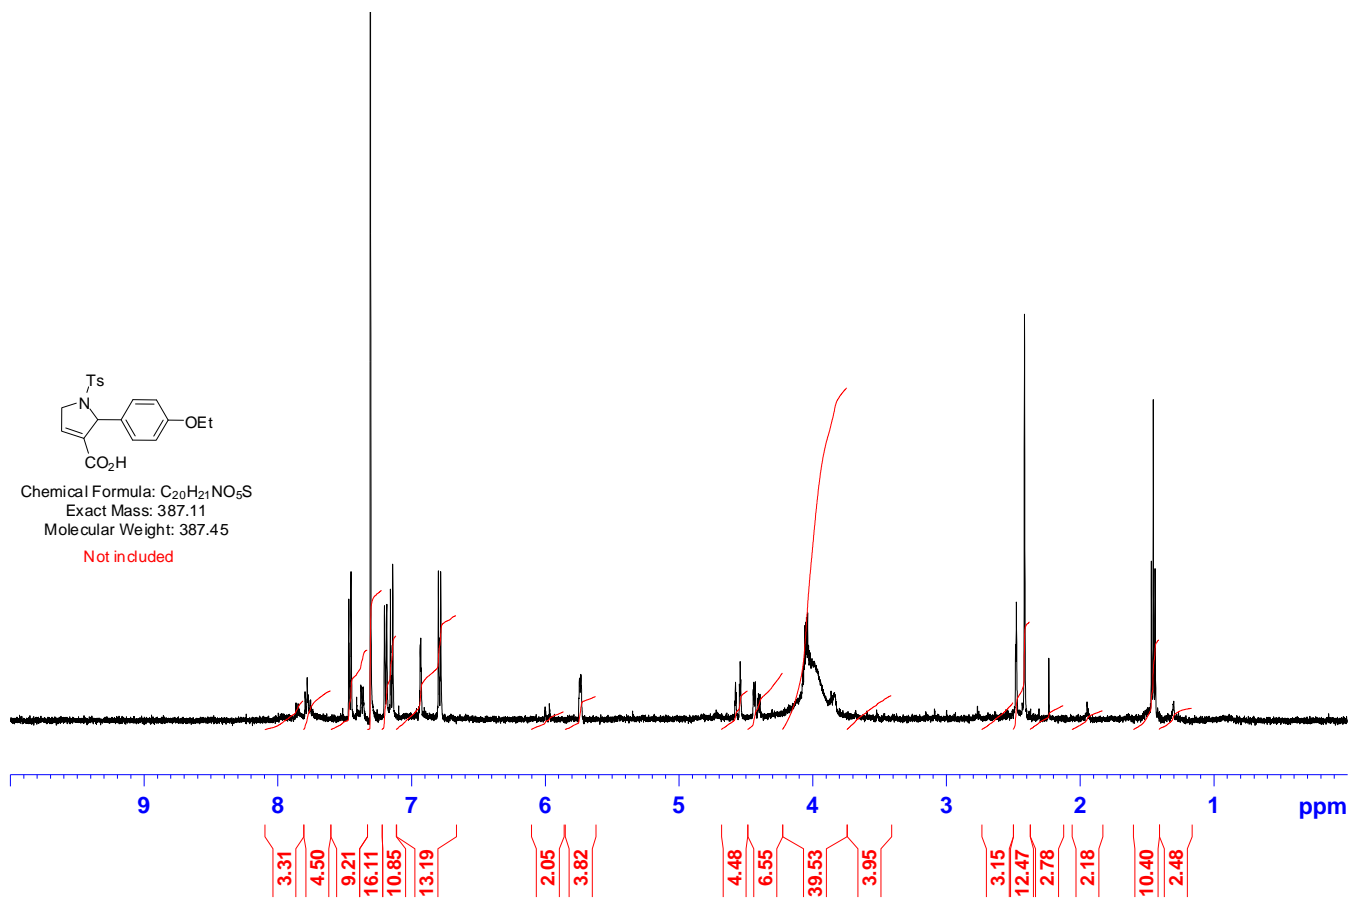

2-(Benzo[d][1,3]dioxol-5-yl)-1-tosyl-2,5-dihydro-1H-pyrrole-3-carboxylic acid (A01C06)

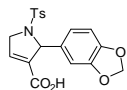

C<sub>18</sub>H<sub>17</sub>NO<sub>6</sub>S  
 Exact Mass: 387.08  
 Mol. Wt.: 387.41

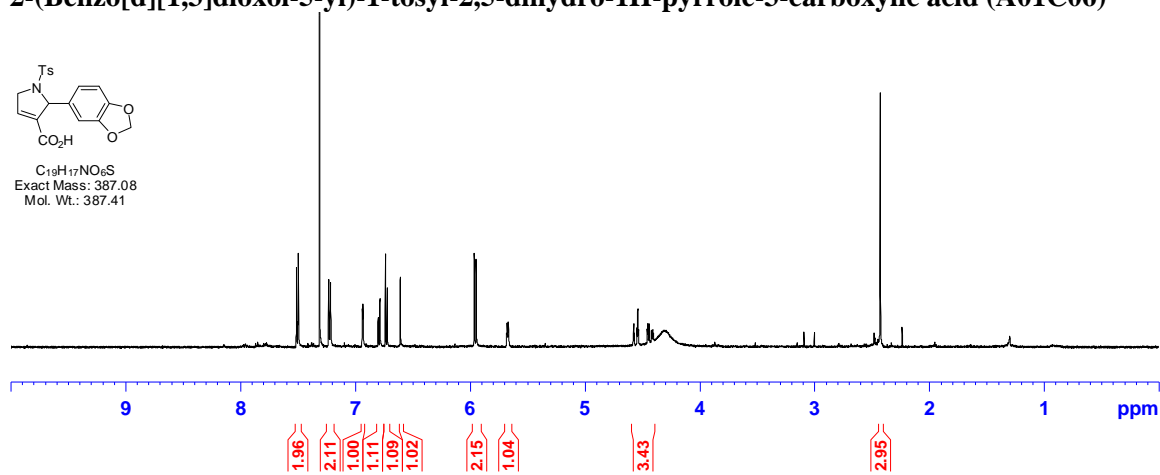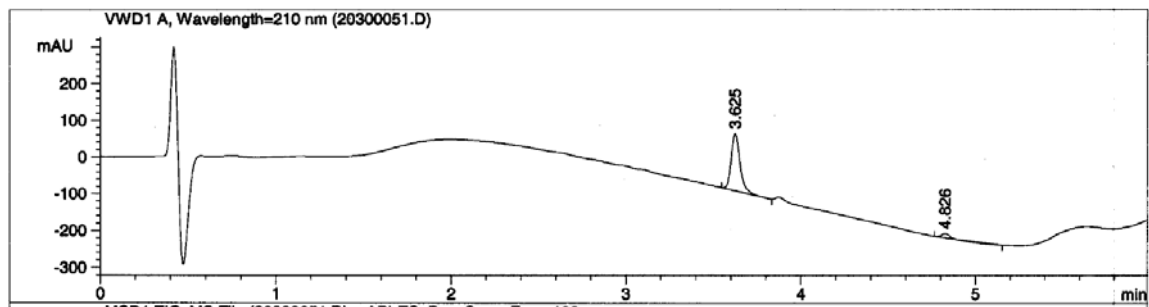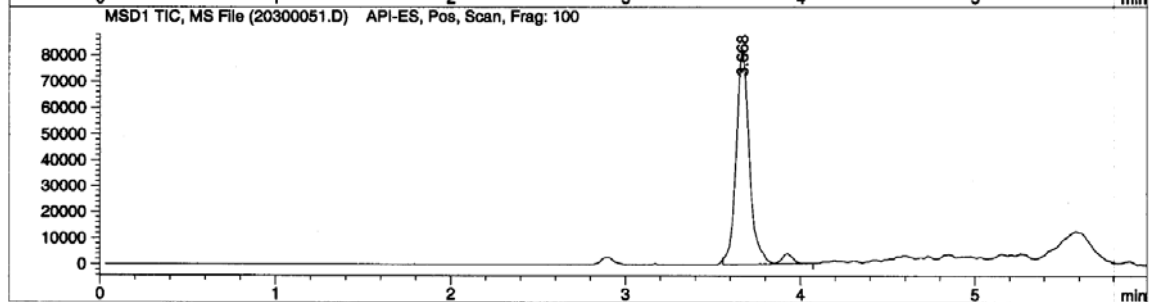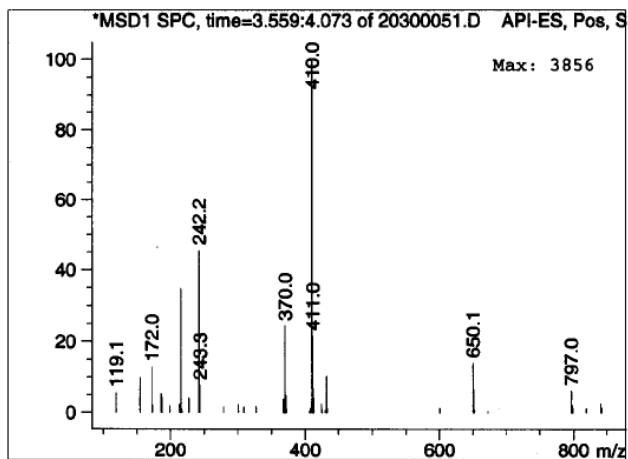

2-(4-Cyanophenyl)-1-tosyl-2,5-dihydro-1H-pyrrole-3-carboxylic acid (A01C09)

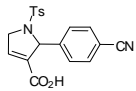

C<sub>19</sub>H<sub>16</sub>N<sub>2</sub>O<sub>4</sub>S  
 Exact Mass: 368.08  
 Mol. Wt.: 368.41

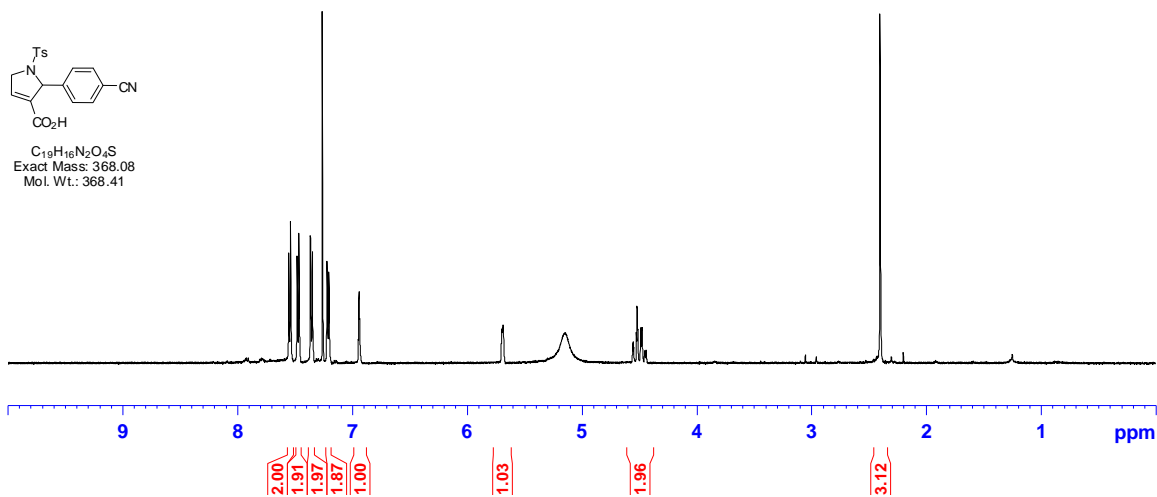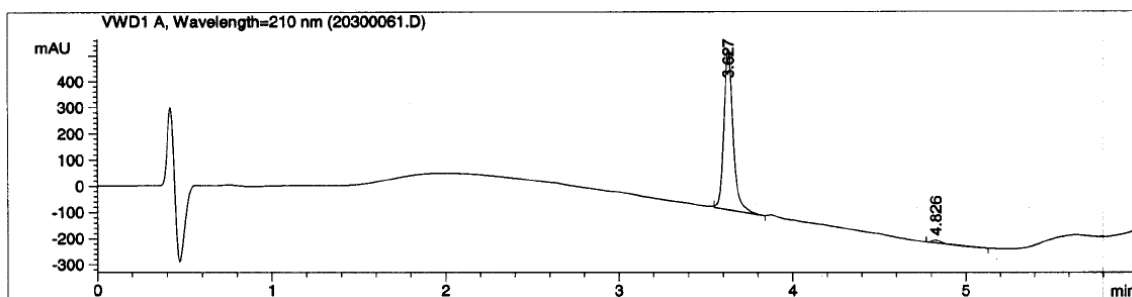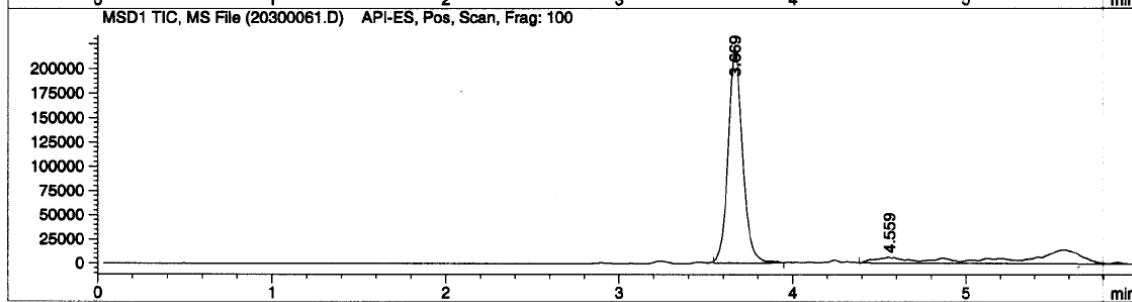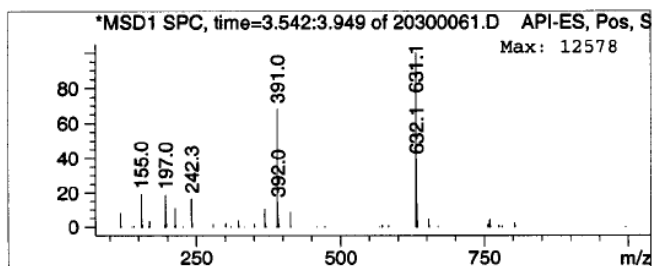

# 2-(2-Fluorophenyl)-1-tosyl-2,5-dihydro-1H-pyrrole-3-carboxylic acid (A01C10)

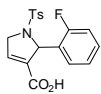

C<sub>18</sub>H<sub>16</sub>FN<sub>2</sub>O<sub>4</sub>S  
Exact Mass: 361.08  
Mol. Wt.: 361.39

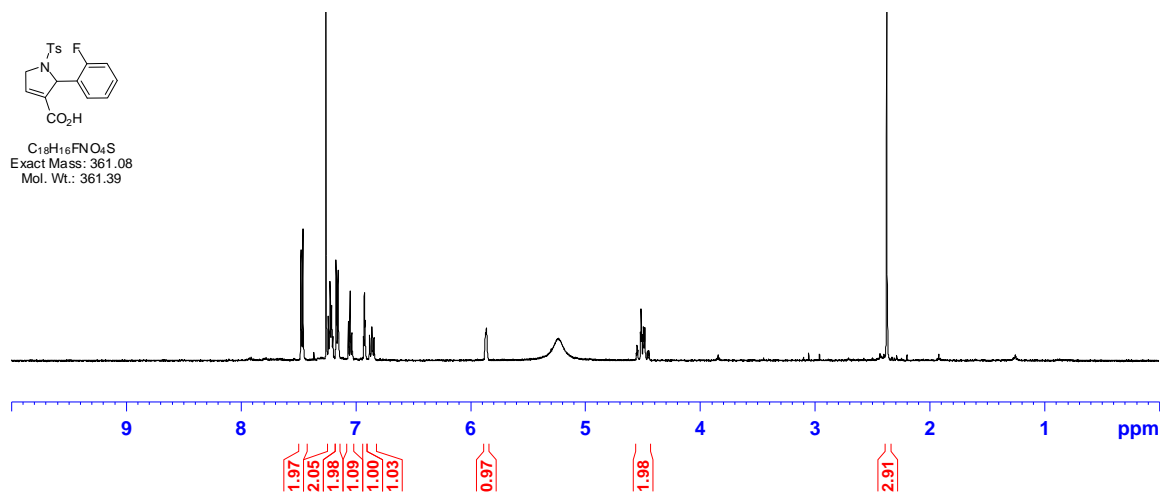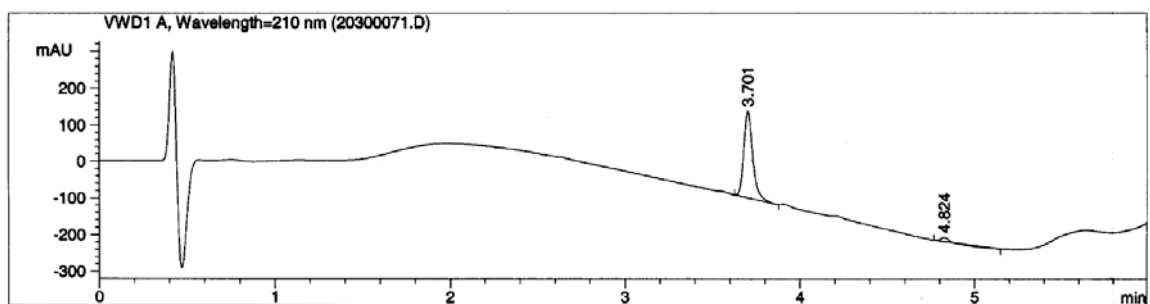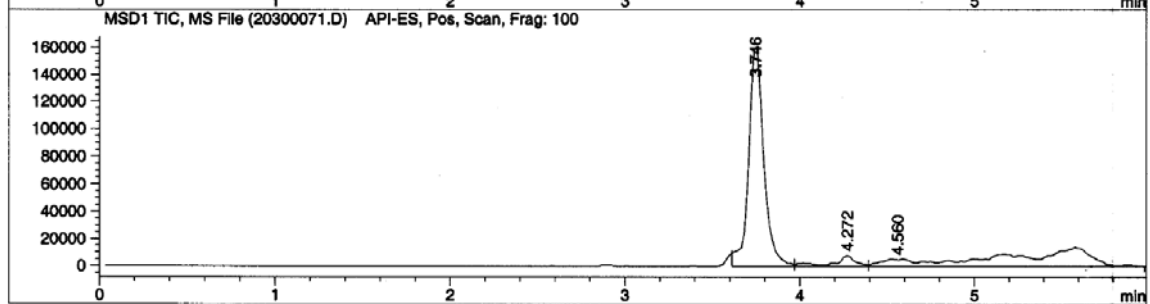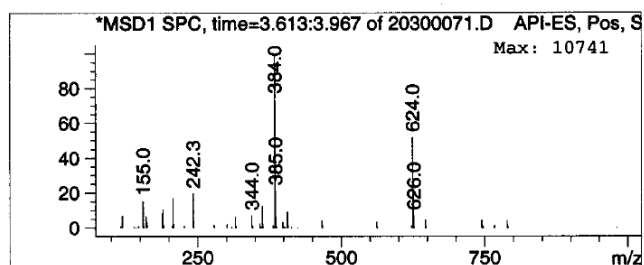

# 2-(4-Chlorophenyl)-1-tosyl-2,5-dihydro-1H-pyrrole-3-carboxylic acid (A01C11)

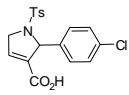

C<sub>18</sub>H<sub>16</sub>ClNO<sub>4</sub>S  
Exact Mass: 377.05  
Mol. Wt.: 377.84

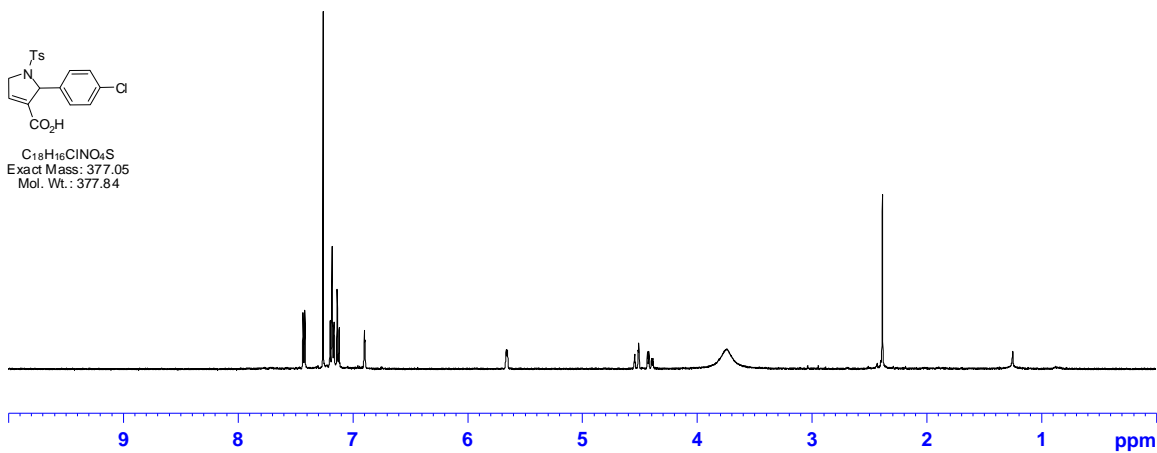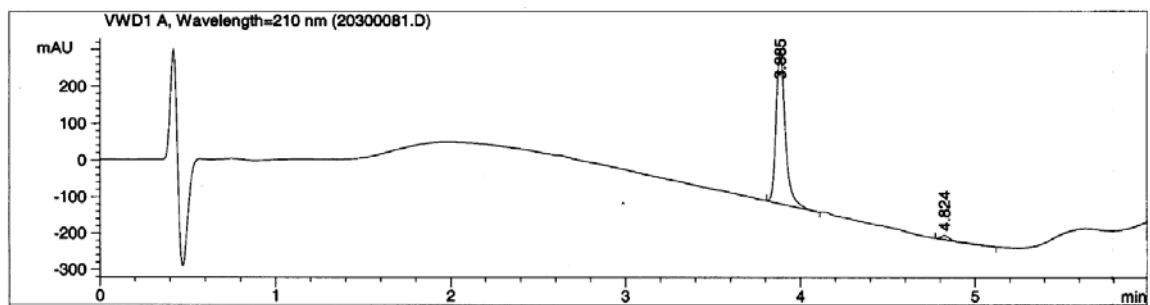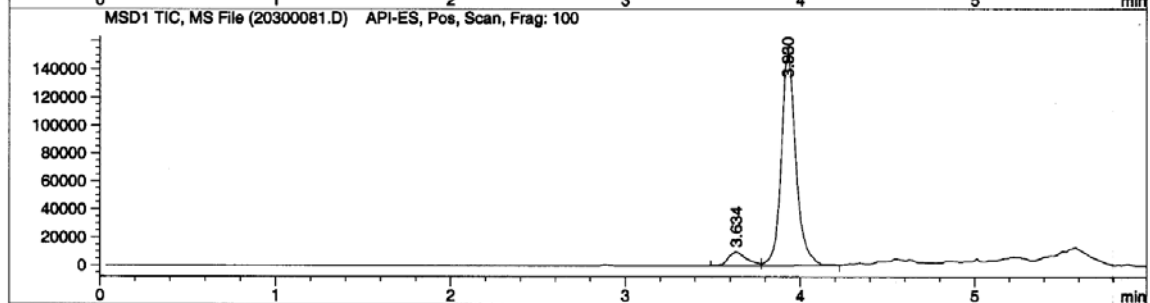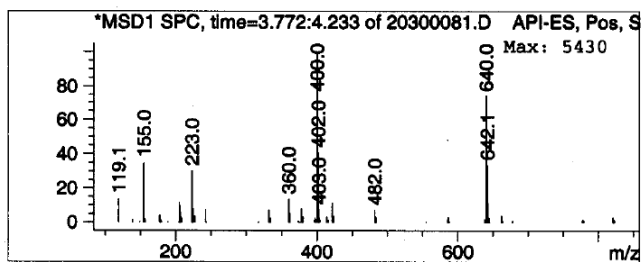

2-(3-Chlorophenyl)-1-tosyl-2,5-dihydro-1H-pyrrole-3-carboxylic acid (A01C12)

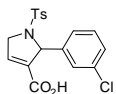

C<sub>18</sub>H<sub>16</sub>ClNO<sub>4</sub>S  
 Exact Mass: 377.05  
 Mol. Wt.: 377.84

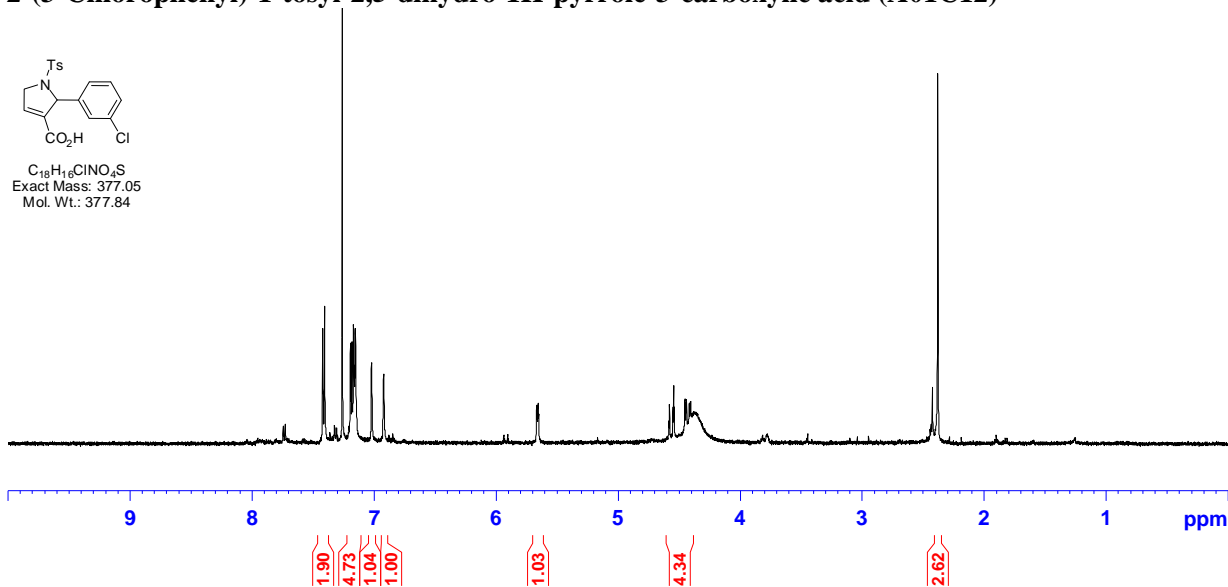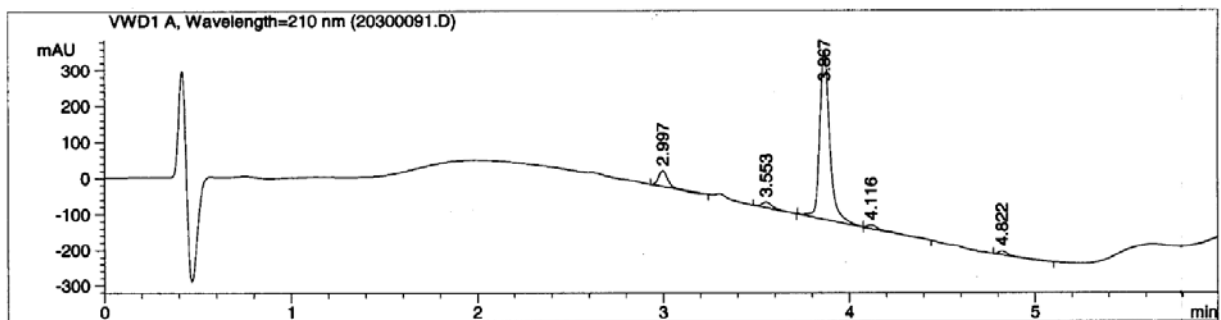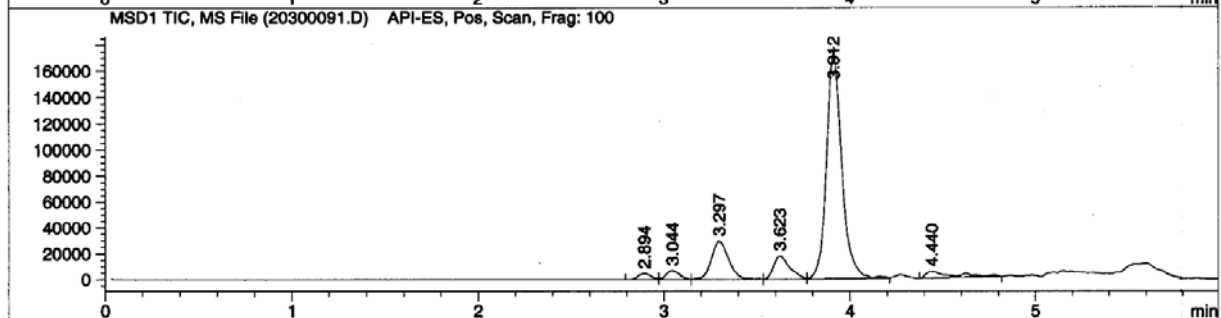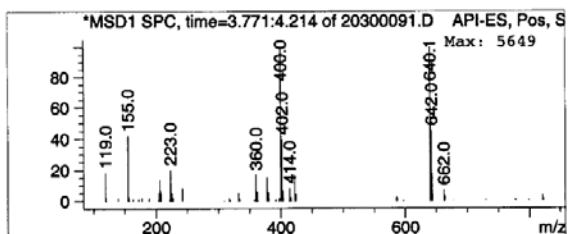

2-(3,4-Dichlorophenyl)-1-tosyl-2,5-dihydro-1H-pyrrole-3-carboxylic acid (A01C13)

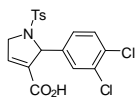

C<sub>18</sub>H<sub>15</sub>Cl<sub>2</sub>NO<sub>4</sub>S  
 Exact Mass: 411.01  
 Mol. Wt.: 412.29

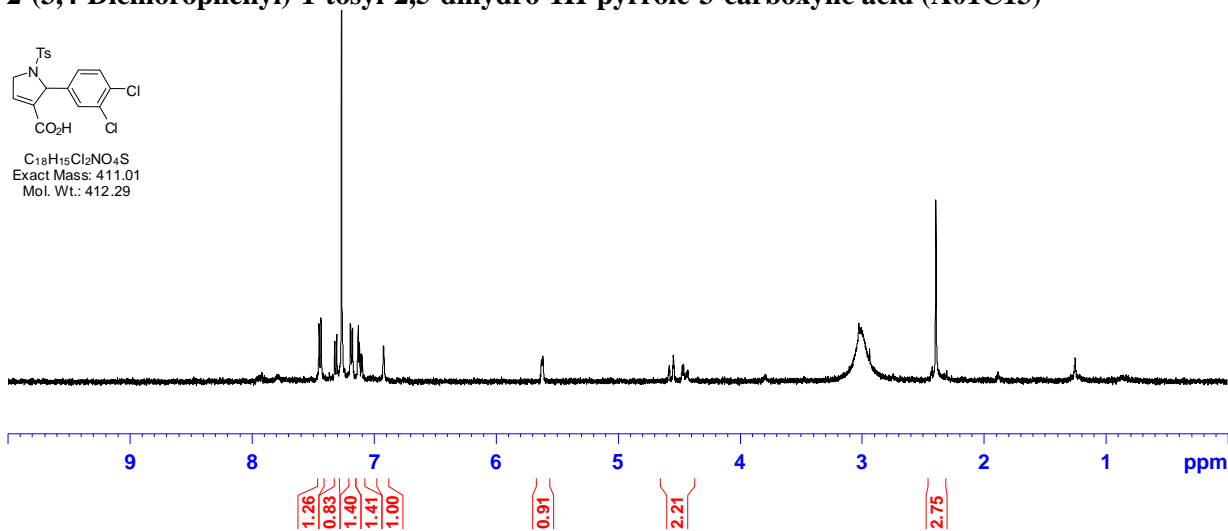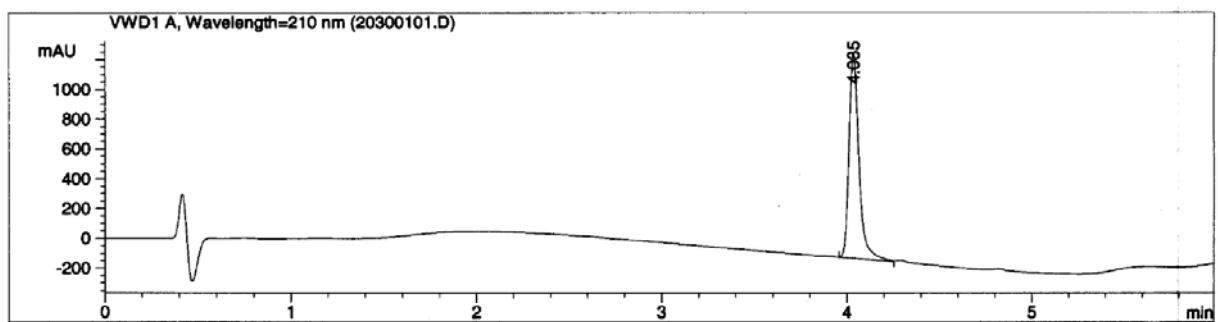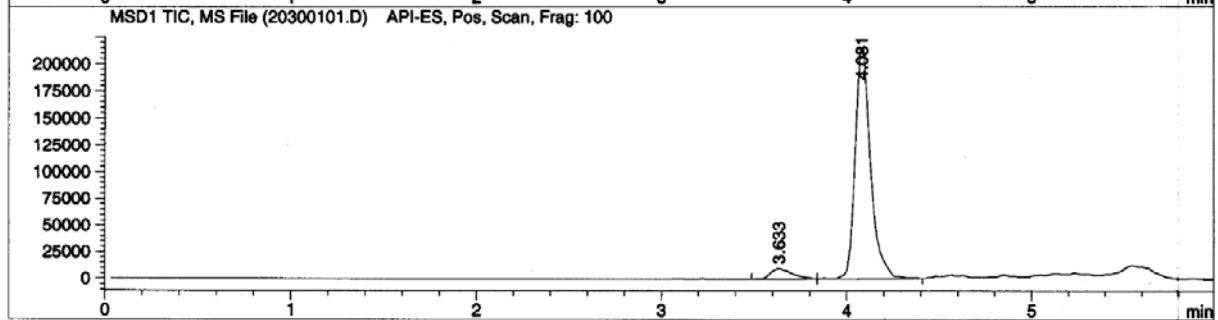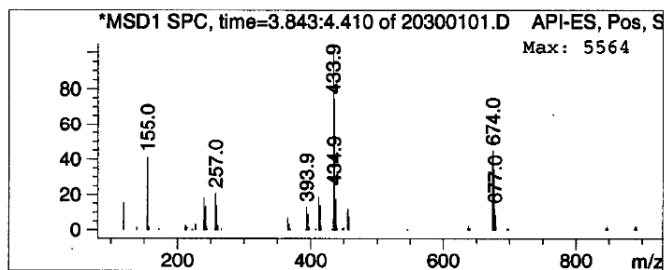



# 2-(4-Bromophenyl)-1-tosyl-2,5-dihydro-1H-pyrrole-3-carboxylic acid (A01C14)

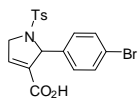

C<sub>18</sub>H<sub>16</sub>BrNO<sub>4</sub>S  
Exact Mass: 421  
Mol. Wt.: 422.29

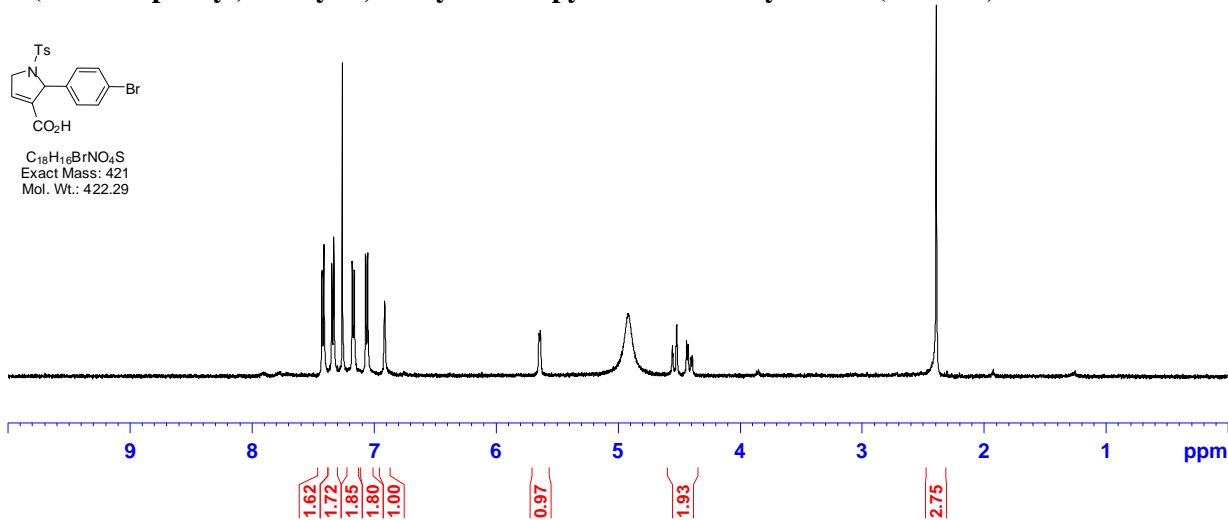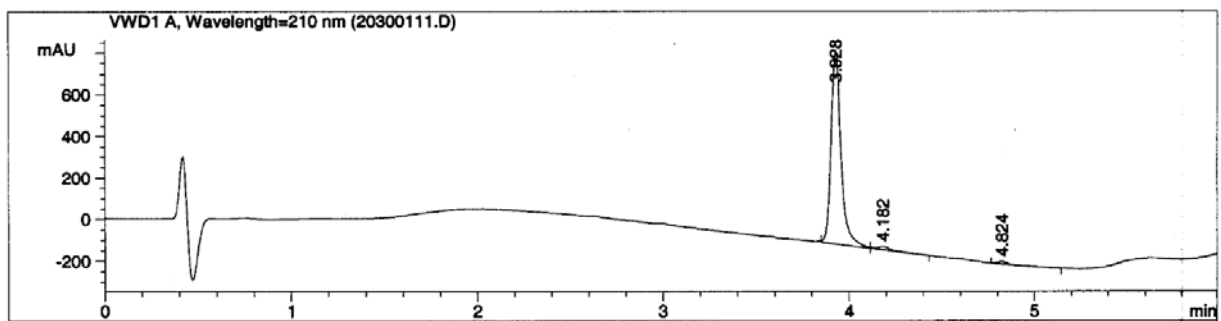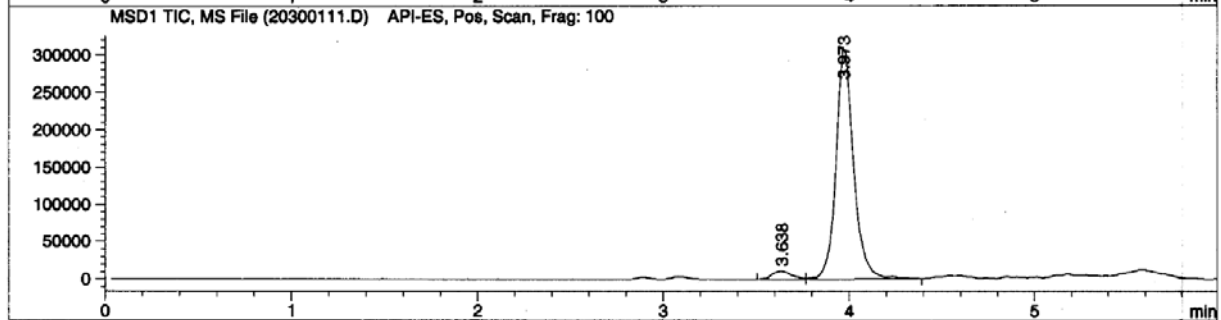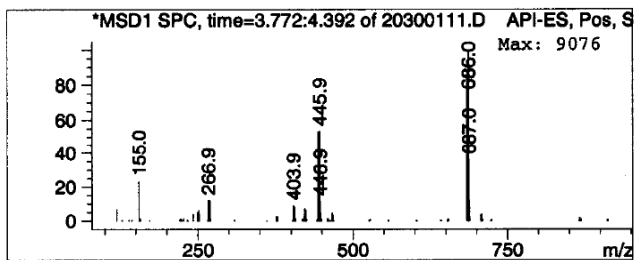

2-(3-Bromophenyl)-1-tosyl-2,5-dihydro-1H-pyrrole-3-carboxylic acid (A01C15)

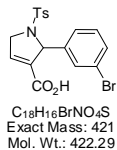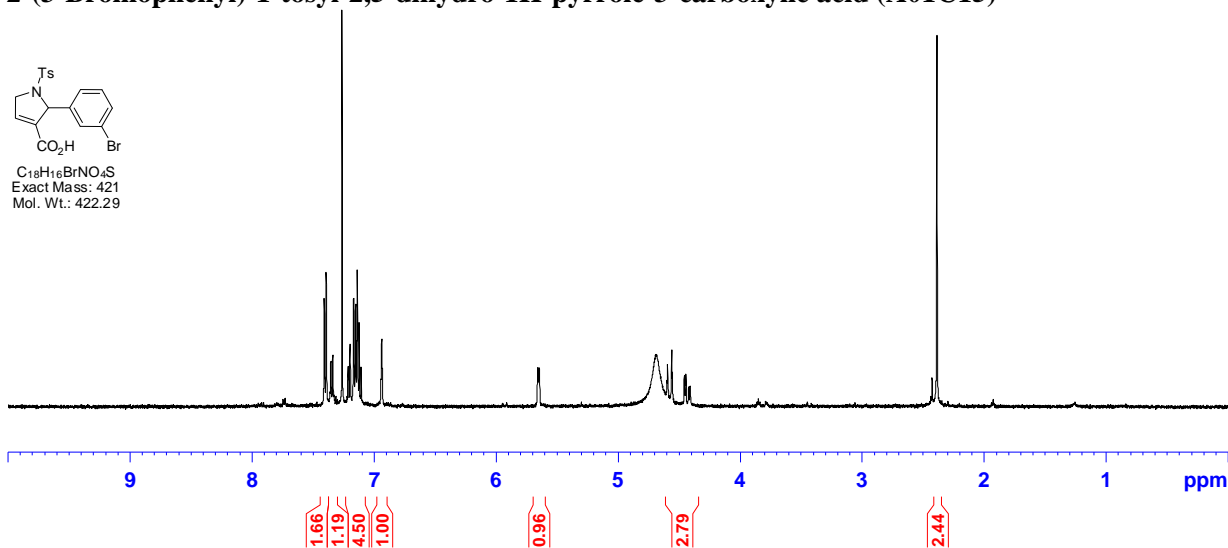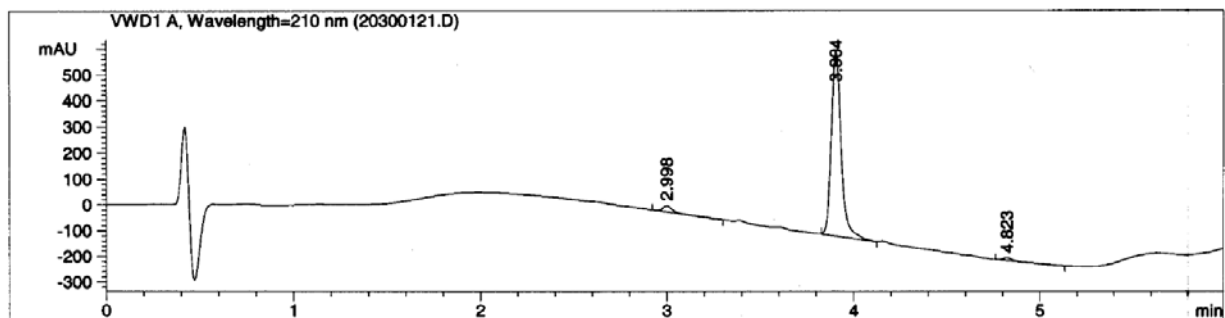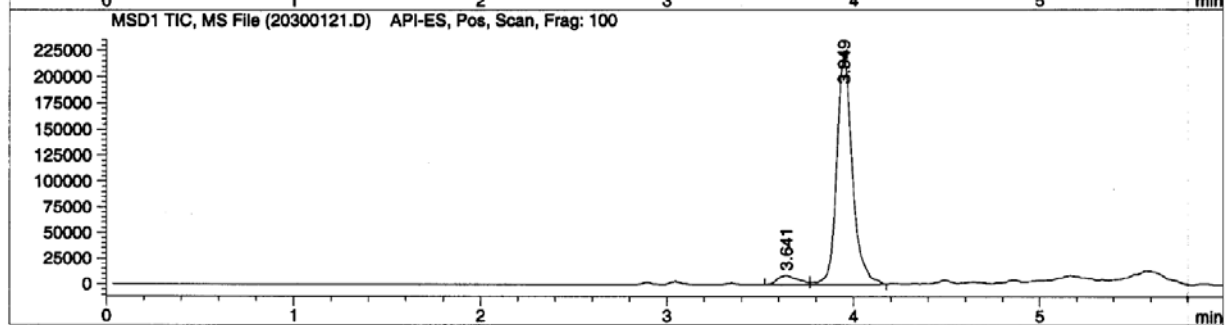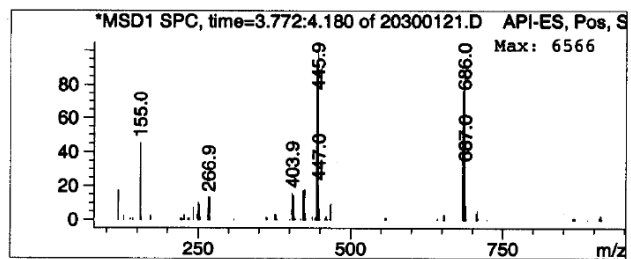

2-(Naphthalen-1-yl)-1-tosyl-2,5-dihydro-1H-pyrrole-3-carboxylic acid (A01C16)

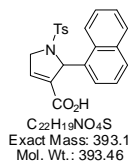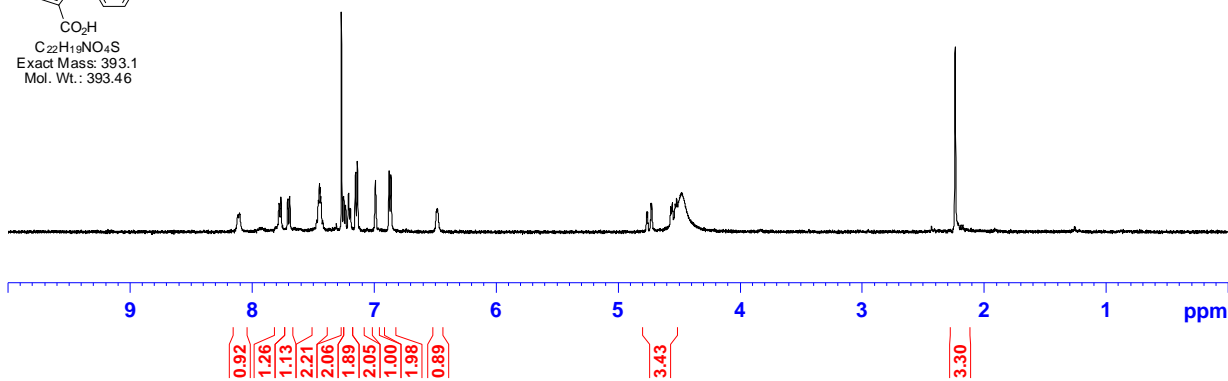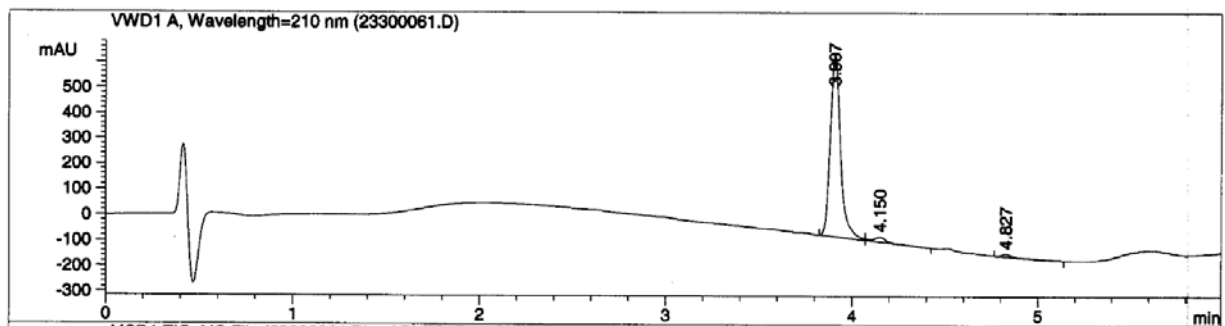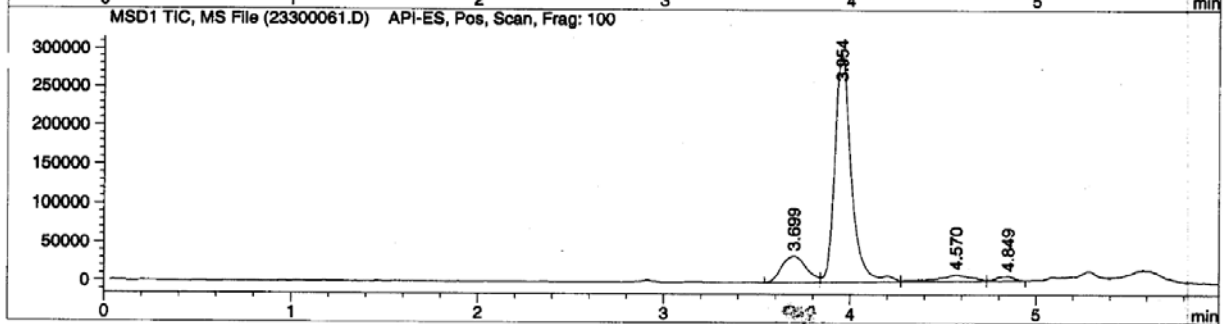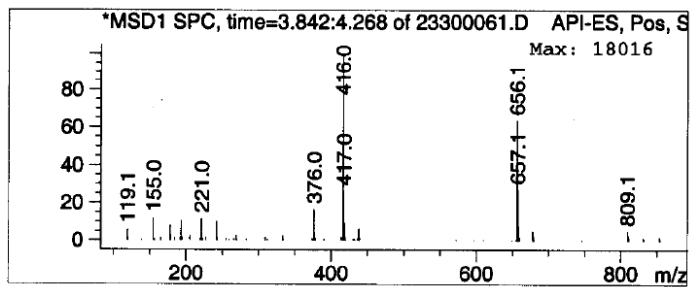

# 1-(4-Nitrophenylsulfonyl)-2-phenyl-2,5-dihydro-1H-pyrrole-3-carboxylic acid (A01C18)

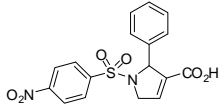

C<sub>17</sub>H<sub>14</sub>N<sub>2</sub>O<sub>6</sub>S  
Exact Mass: 374.06  
Mol. Wt: 374.37

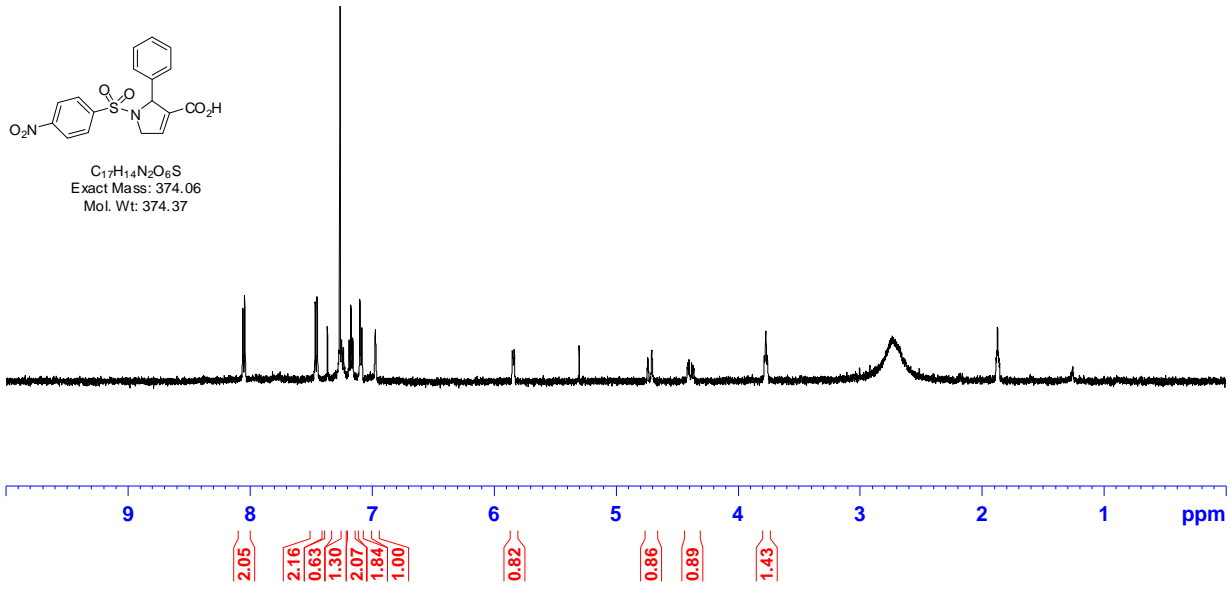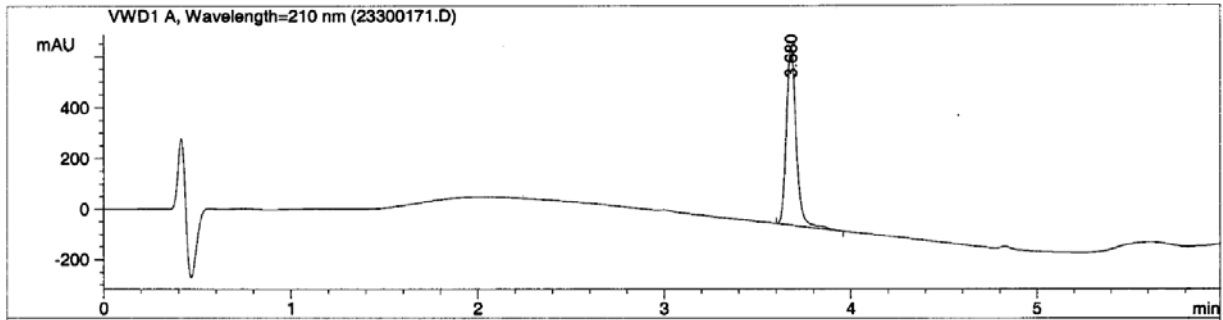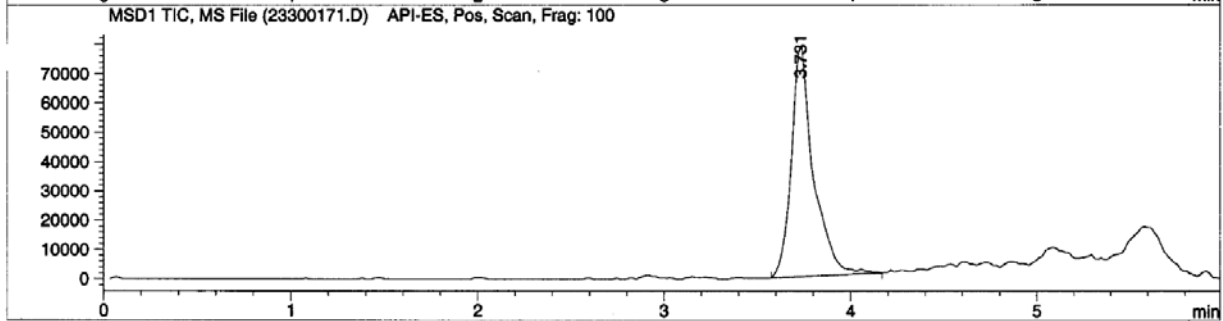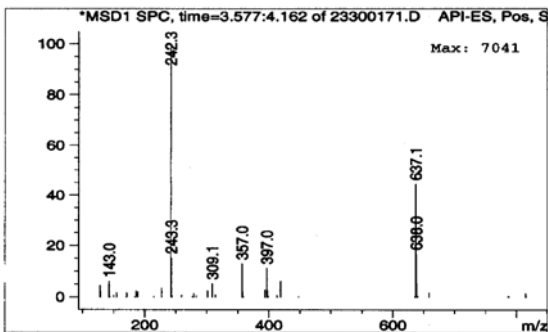

**1-(Methylsulfonyl)-2-phenyl-2,5-dihydro-1H-pyrrole-3-carboxylic acid (A01C19)**

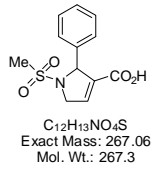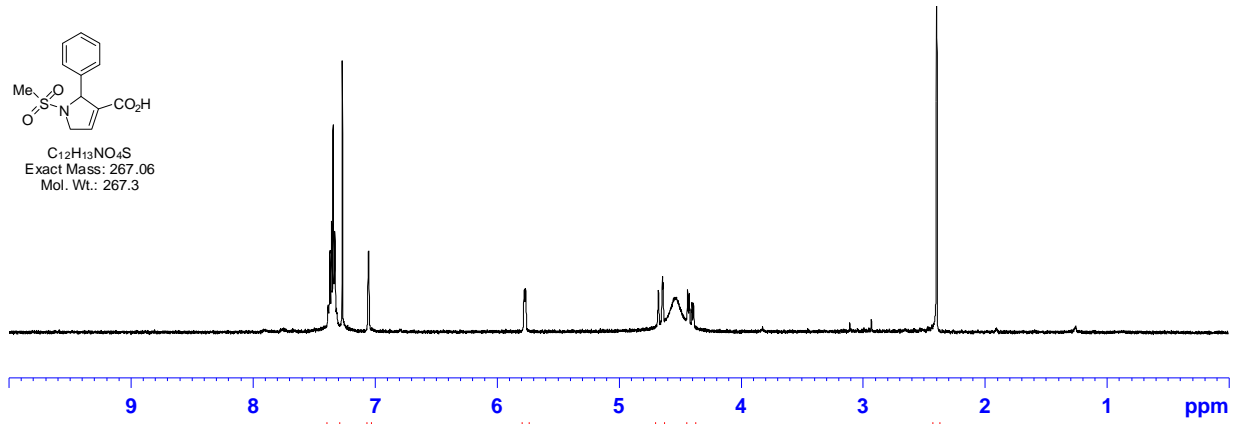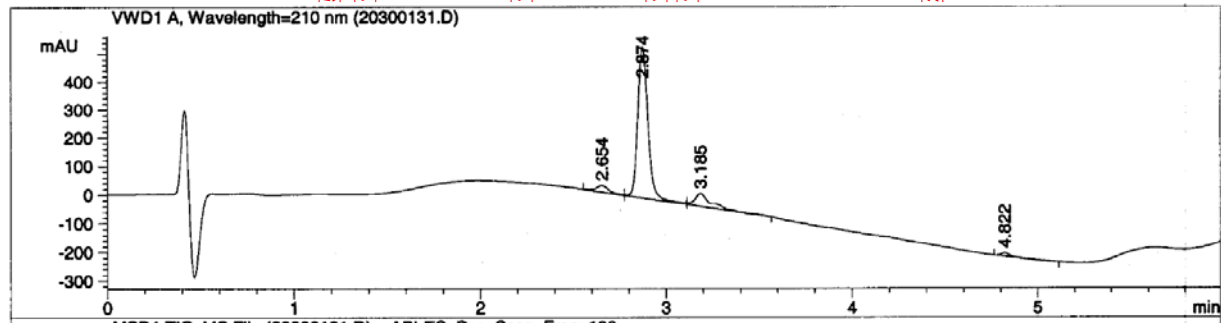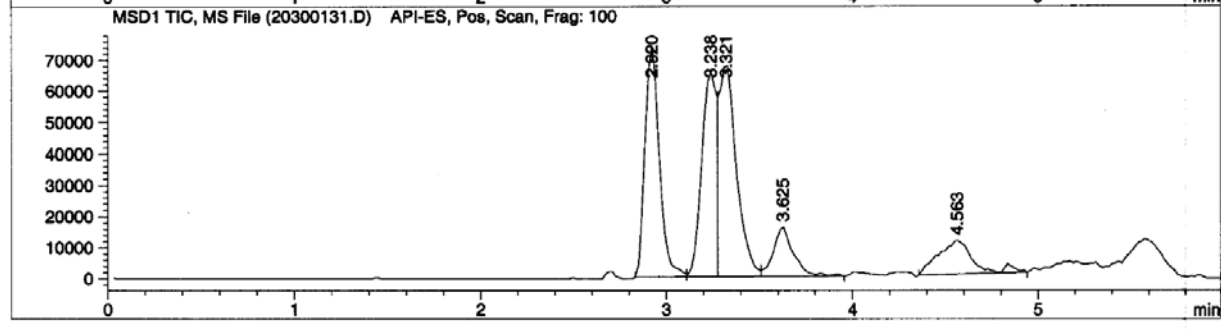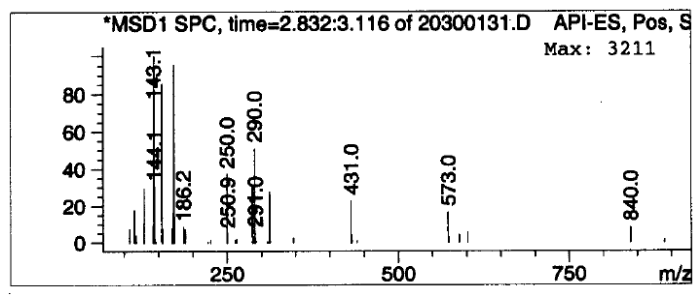

2-(3,4-Dimethoxyphenyl)-1-tosyl-2,5-dihydro-1H-pyrrole-3-carboxylic acid (A01C20)

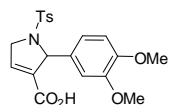

Chemical Formula: C<sub>20</sub>H<sub>21</sub>NO<sub>6</sub>S

Exact Mass: 403.11

Molecular Weight: 403.45

Not included

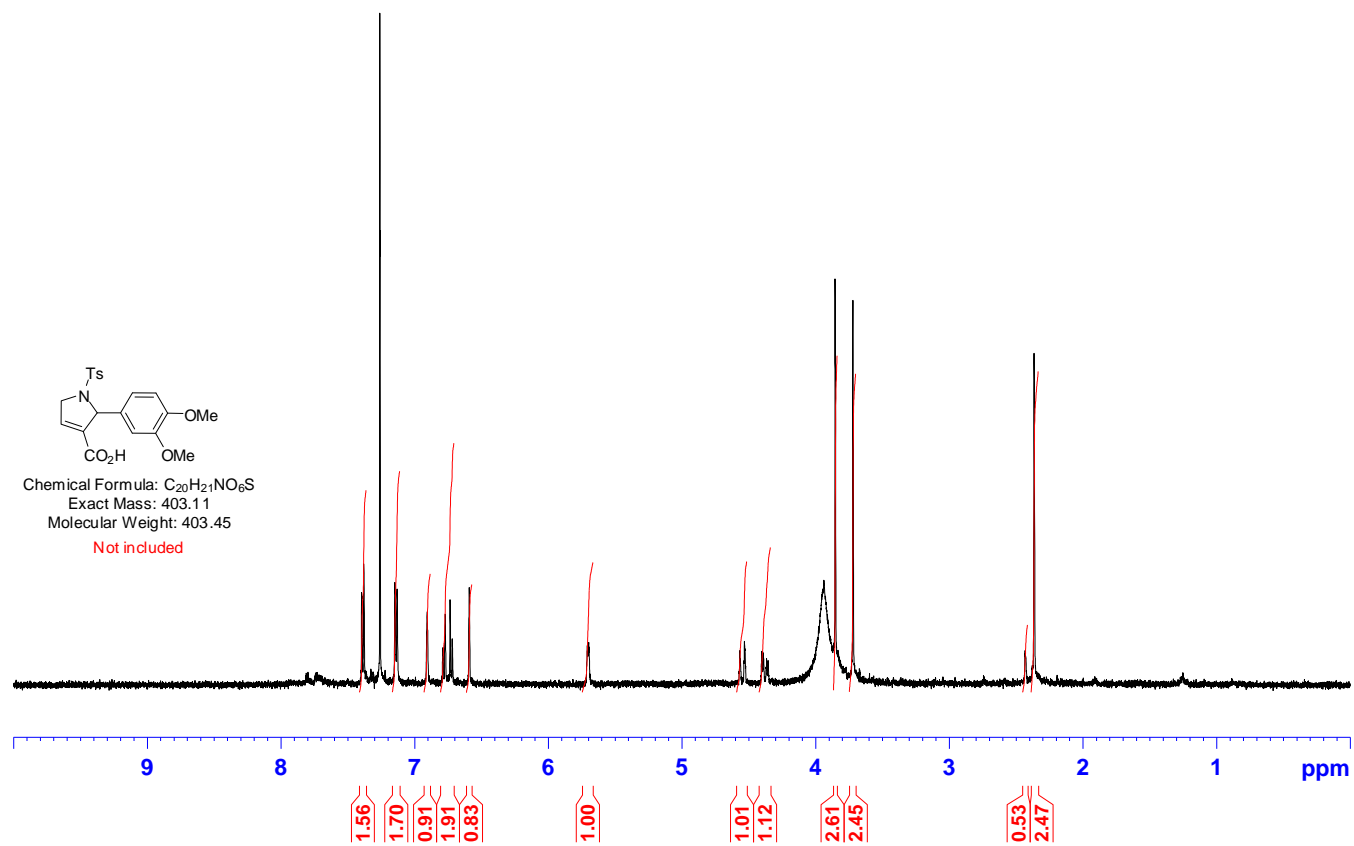

# 2-(Thiophen-2-yl)-1-tosyl-2,5-dihydro-1H-pyrrole-3-carboxylic acid (A01C21)

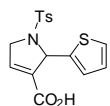

Chemical Formula:  
 $C_{16}H_{15}NO_4S_2$   
Exact Mass: 349.04  
Molecular Weight: 349.42  
Not included

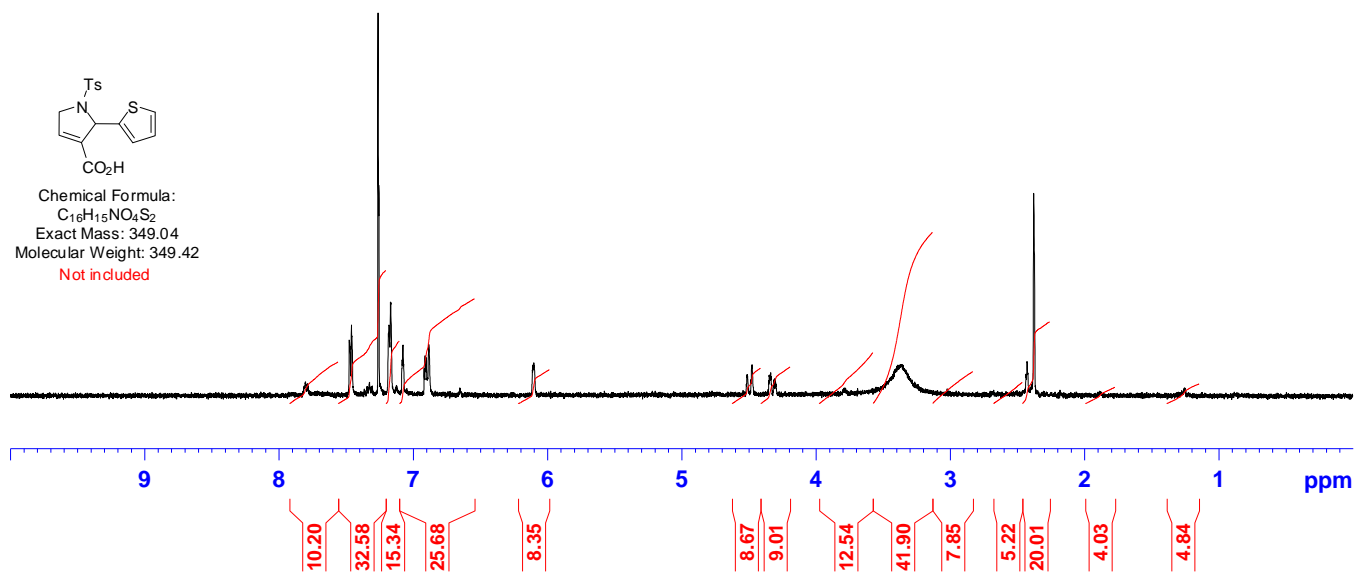

# 2-(4-Fluorophenyl)-1-tosyl-2,5-dihydro-1H-pyrrole-3-carboxylic acid (A01C23)

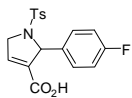

C<sub>18</sub>H<sub>16</sub>FNO<sub>4</sub>S  
Exact Mass: 361.08  
Mol. Wt.: 361.39

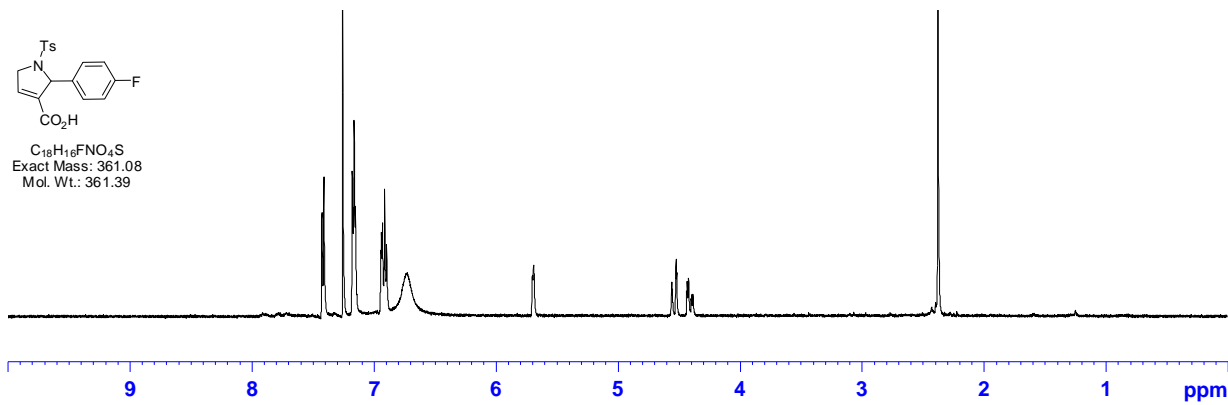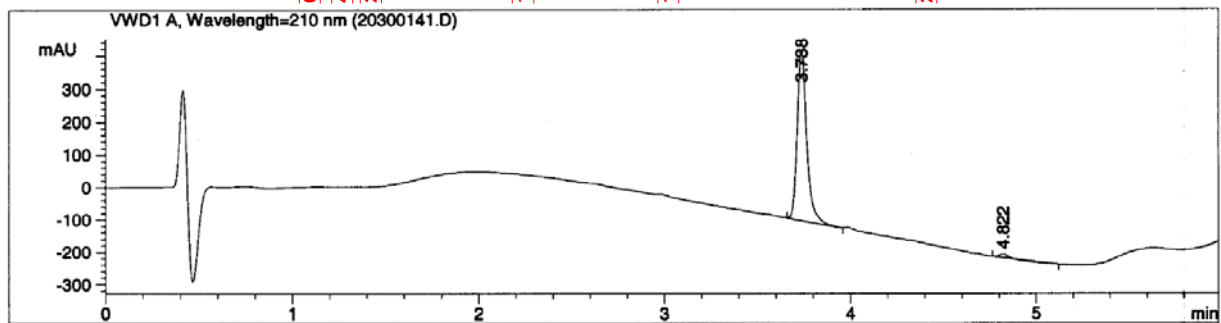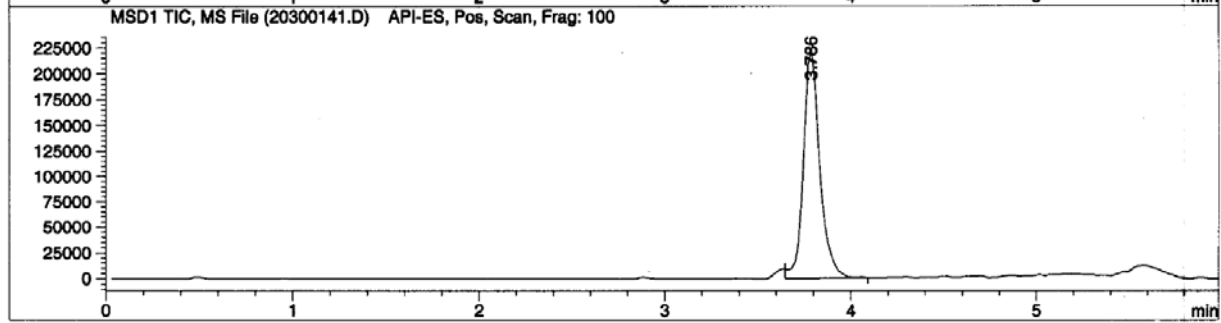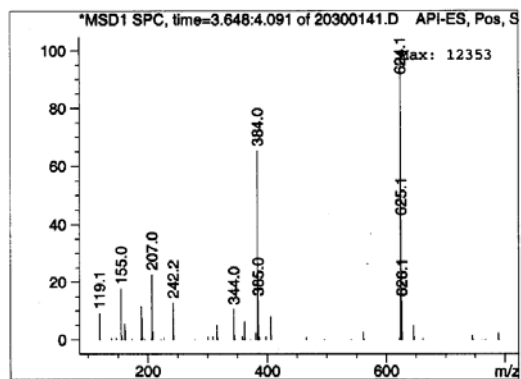



# 2-(4-Isopropylphenyl)-1-tosyl-2,5-dihydro-1H-pyrrole-3-carboxylic acid (A01C24)

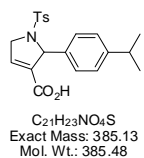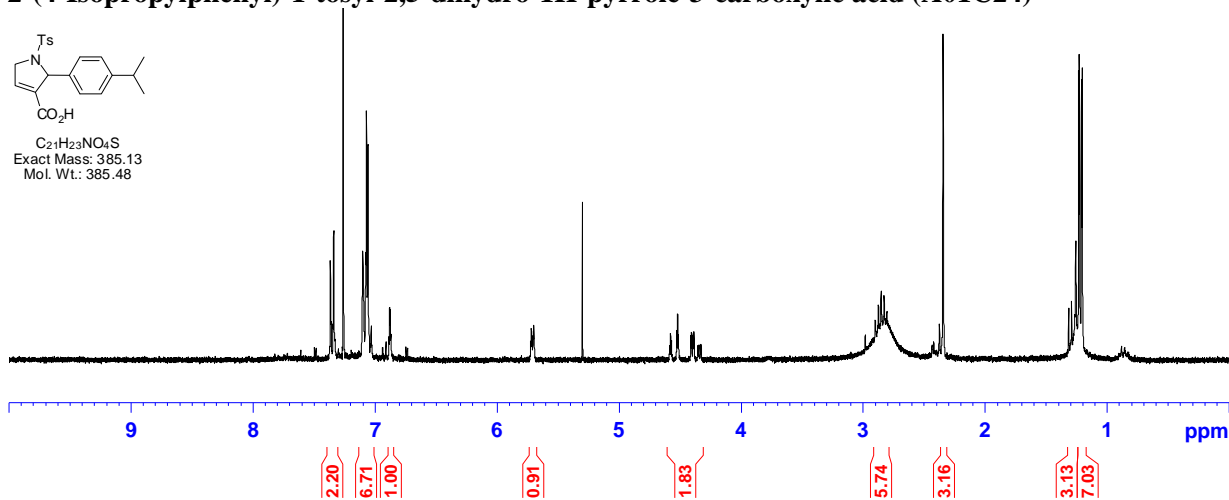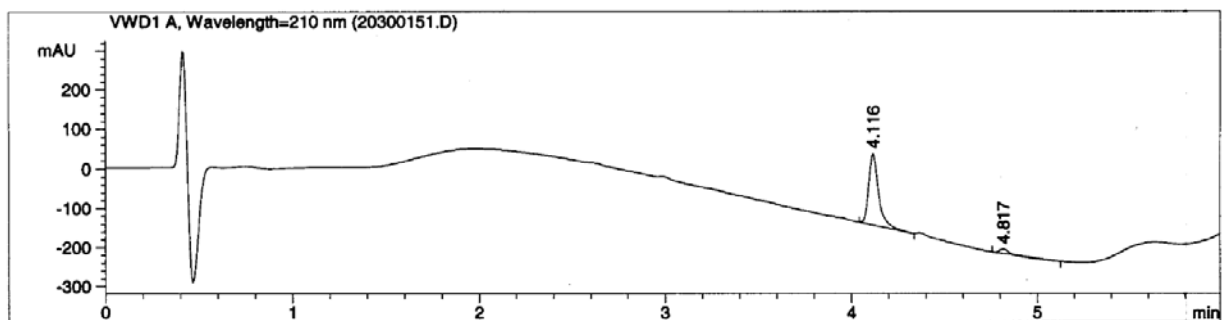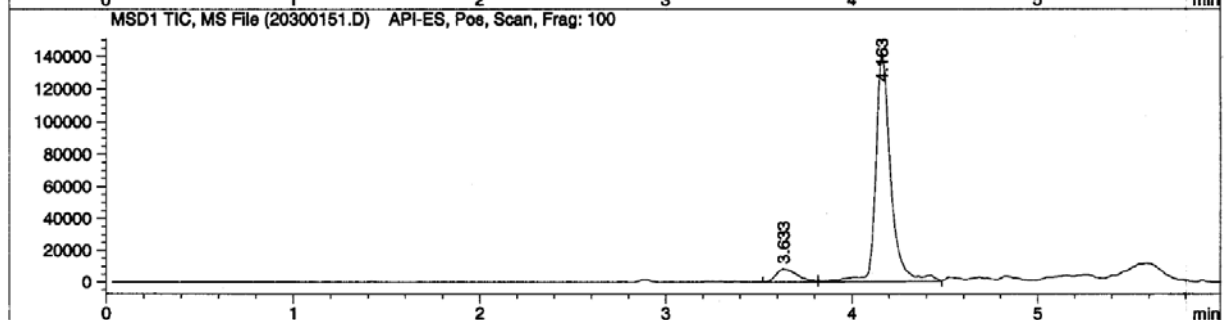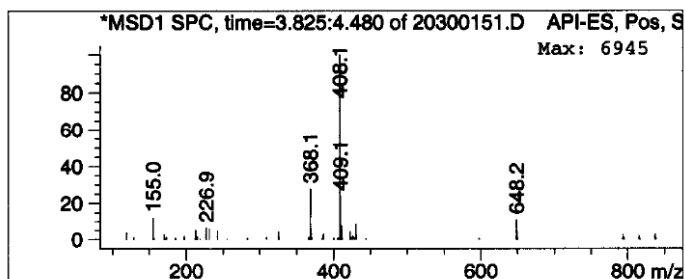

# 1-Tosyl-2-(3,4,5-trimethoxyphenyl)-2,5-dihydro-1H-pyrrole-3-carboxylic acid (A01C25)

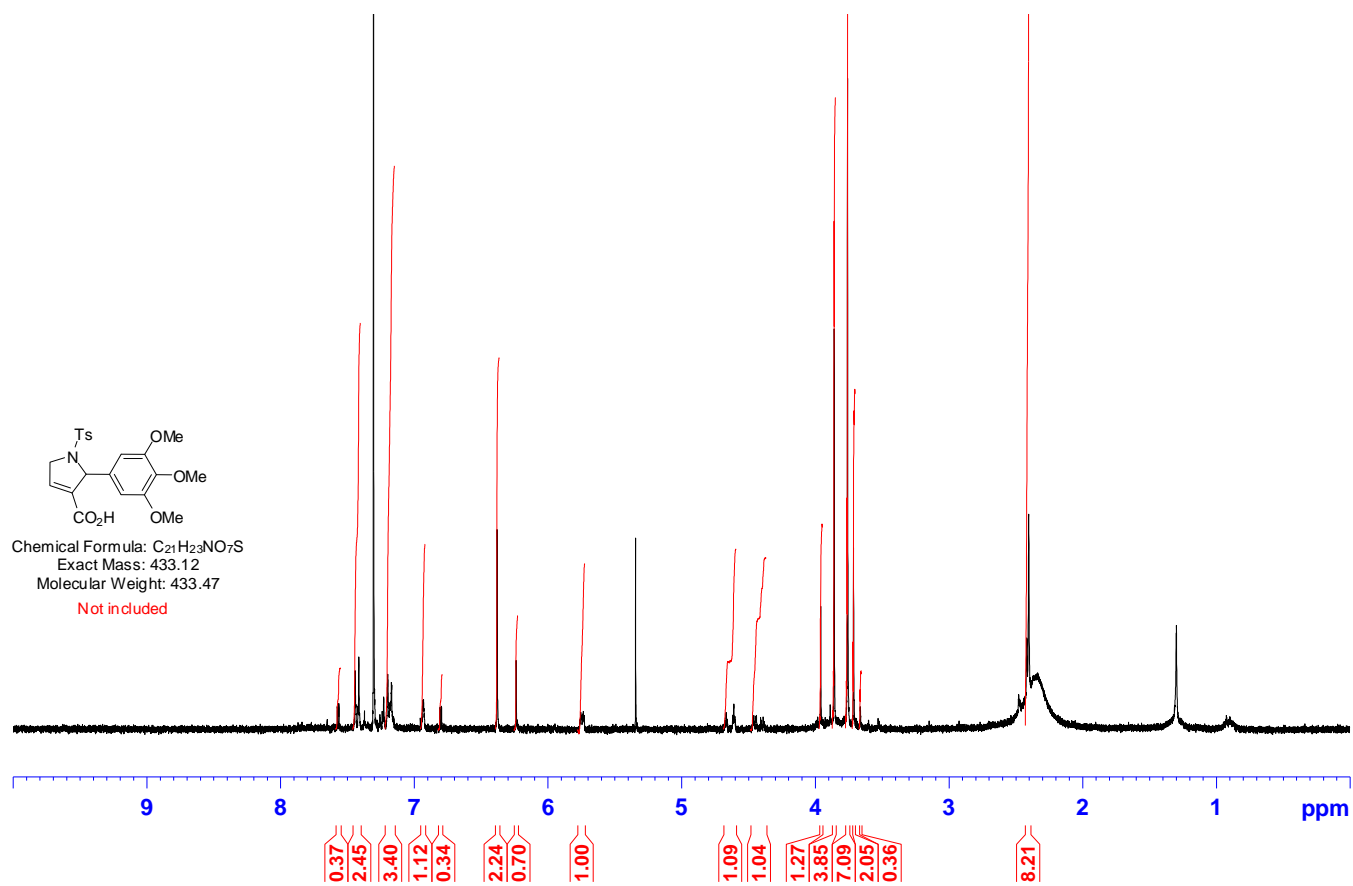

# 2-(3-Fluorophenyl)-1-tosyl-2,5-dihydro-1H-pyrrole-3-carboxylic acid (A01C26)

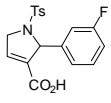

C<sub>18</sub>H<sub>16</sub>FN<sub>2</sub>O<sub>4</sub>S  
Exact Mass: 361.08  
Mol. Wt.: 361.39

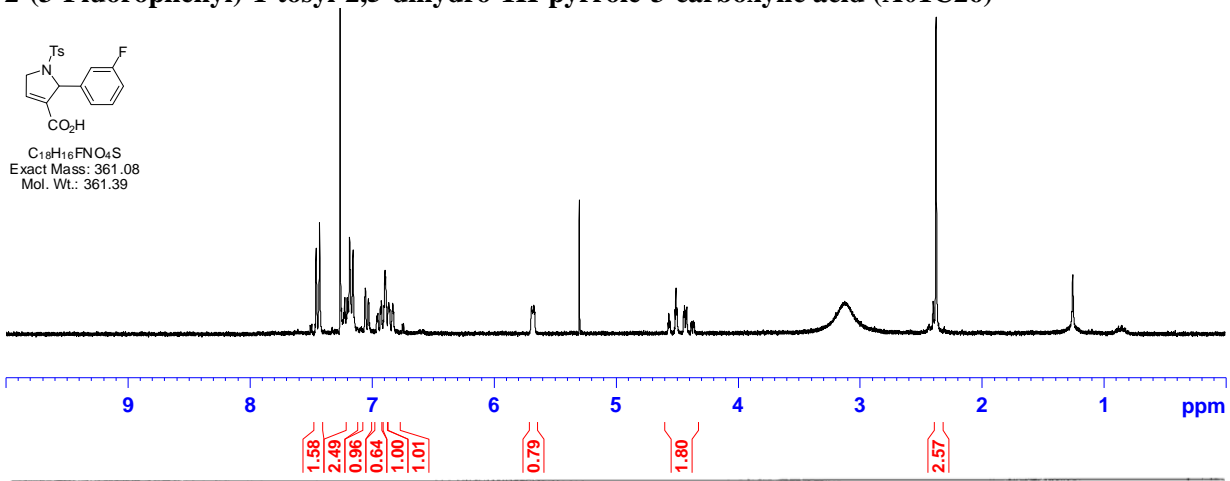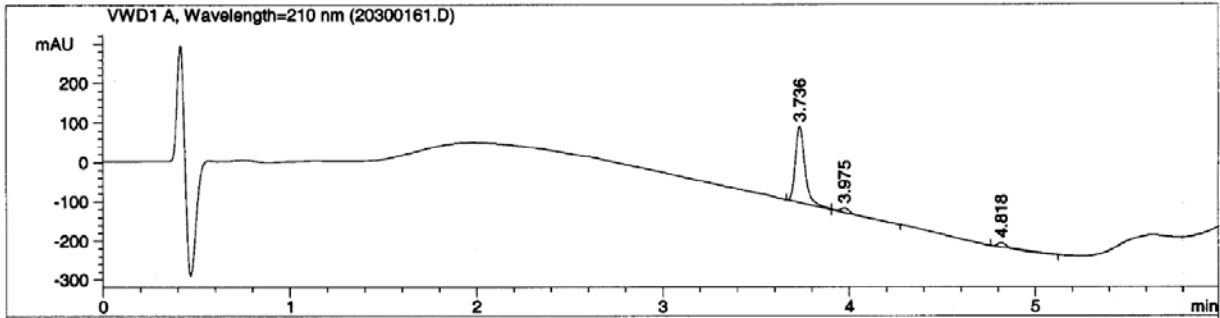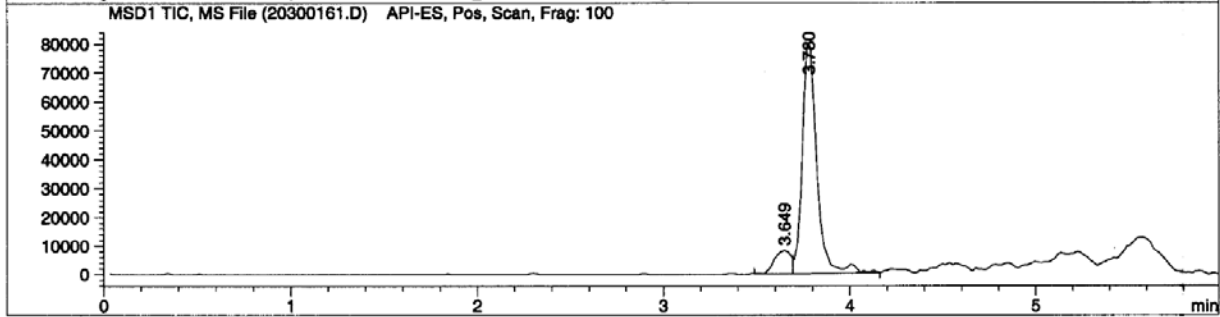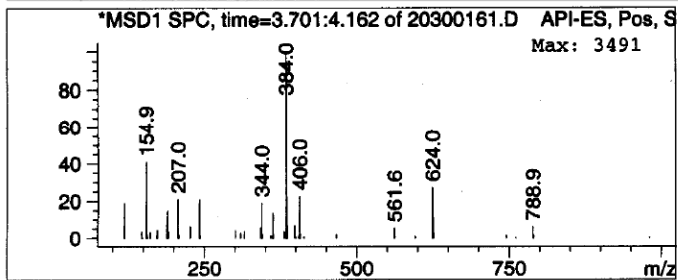

2-(4-Chlorophenyl)-1-(4-chlorophenylsulfonyl)-2,5-dihydro-1H-pyrrole-3-carboxylic acid (A01C27)

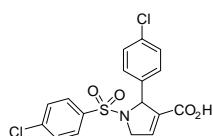

C<sub>17</sub>H<sub>13</sub>Cl<sub>2</sub>NO<sub>4</sub>S  
 Exact Mass: 396.99  
 Mol. Wt.: 398.26

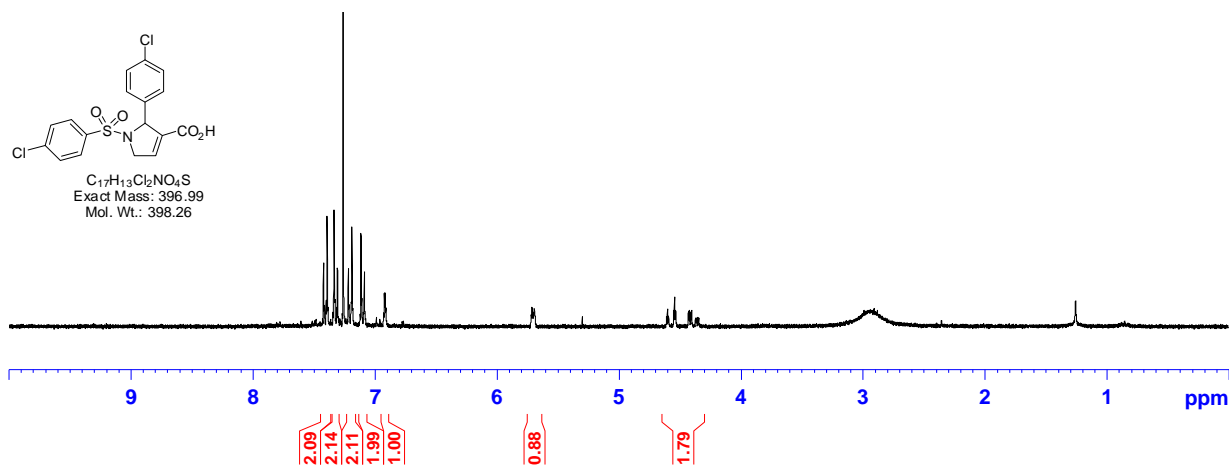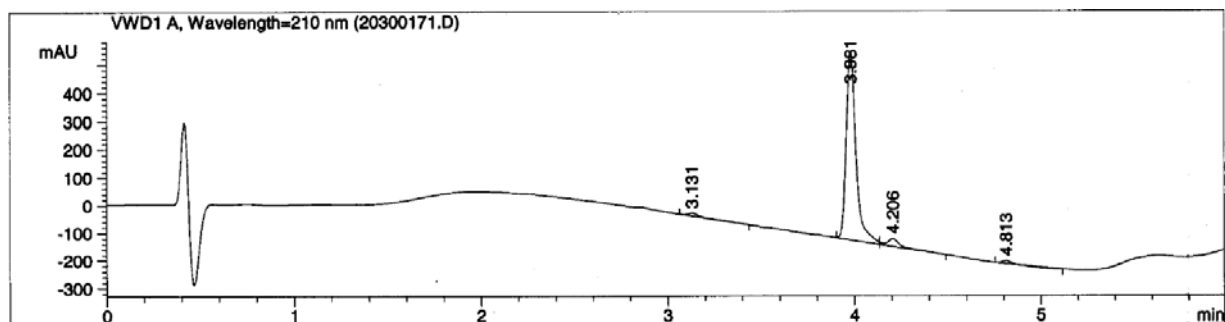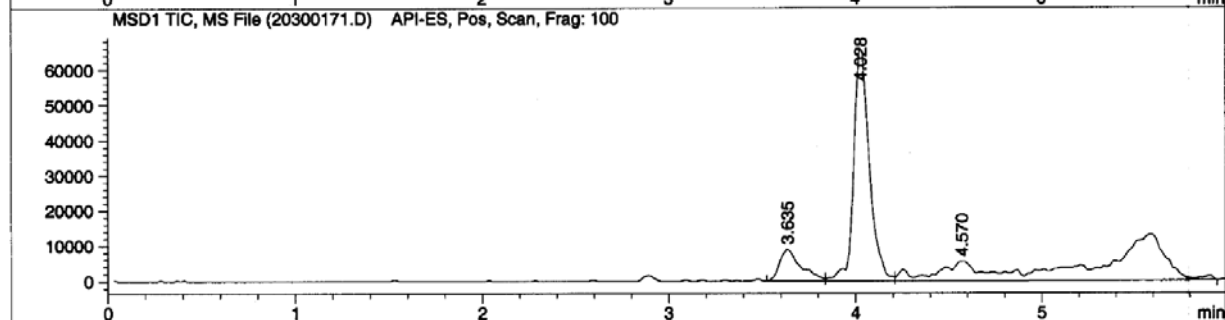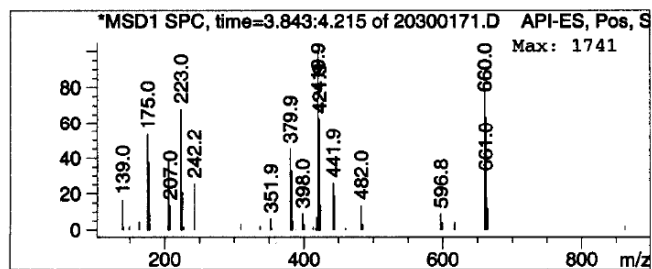

2-(4-Chlorophenyl)-1-(methylsulfonyl)-2,5-dihydro-1H-pyrrole-3-carboxylic acid (A01C28)

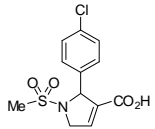

C<sub>12</sub>H<sub>12</sub>ClNO<sub>4</sub>S  
 Exact Mass: 301.02  
 Mol. Wt.: 301.75

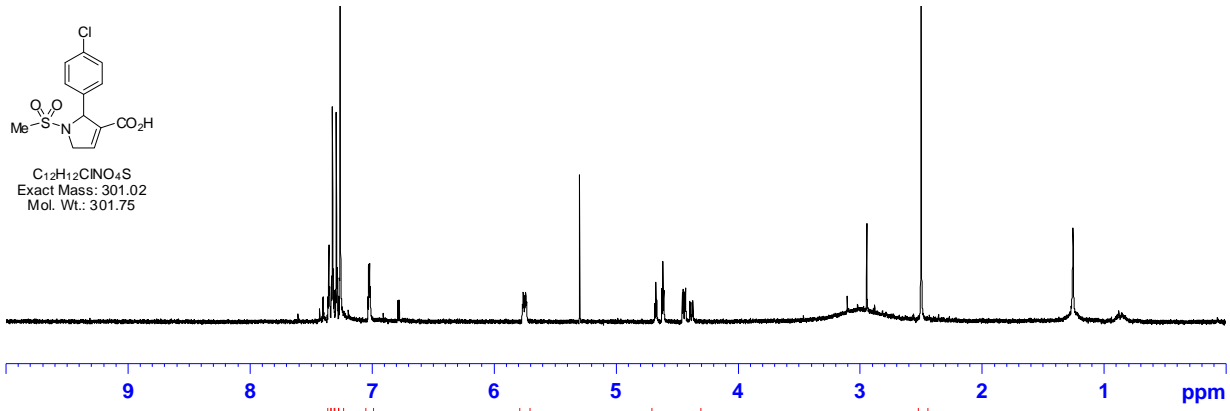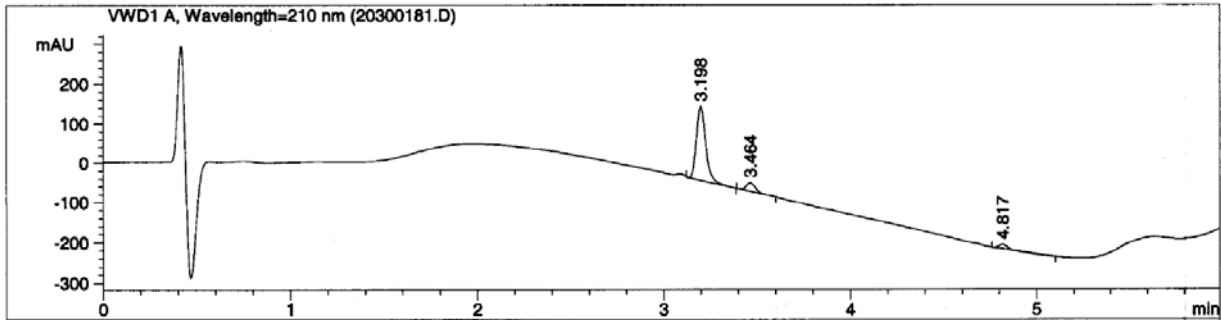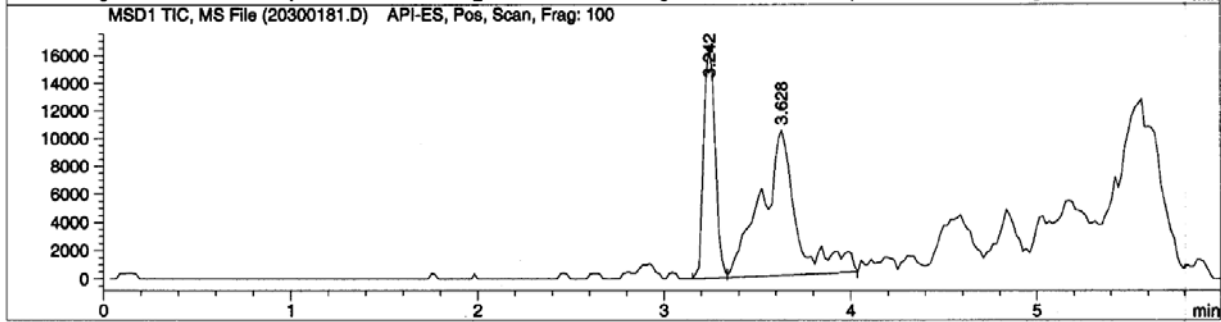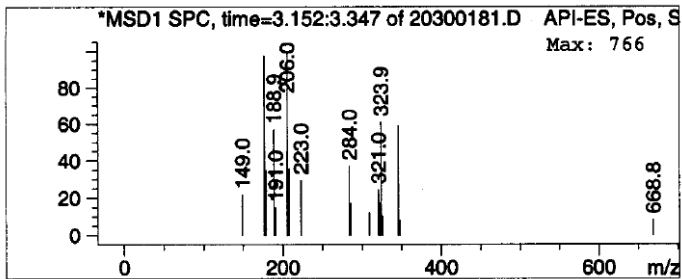

# 2-(4-Chlorophenyl)-1-(phenylsulfonyl)-2,5-dihydro-1H-pyrrole-3-carboxylic acid (A01C29)

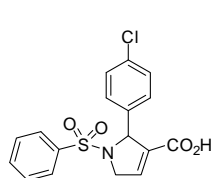

C<sub>17</sub>H<sub>14</sub>ClNO<sub>4</sub>S  
Exact Mass: 363.03  
Mol. Wt.: 363.82

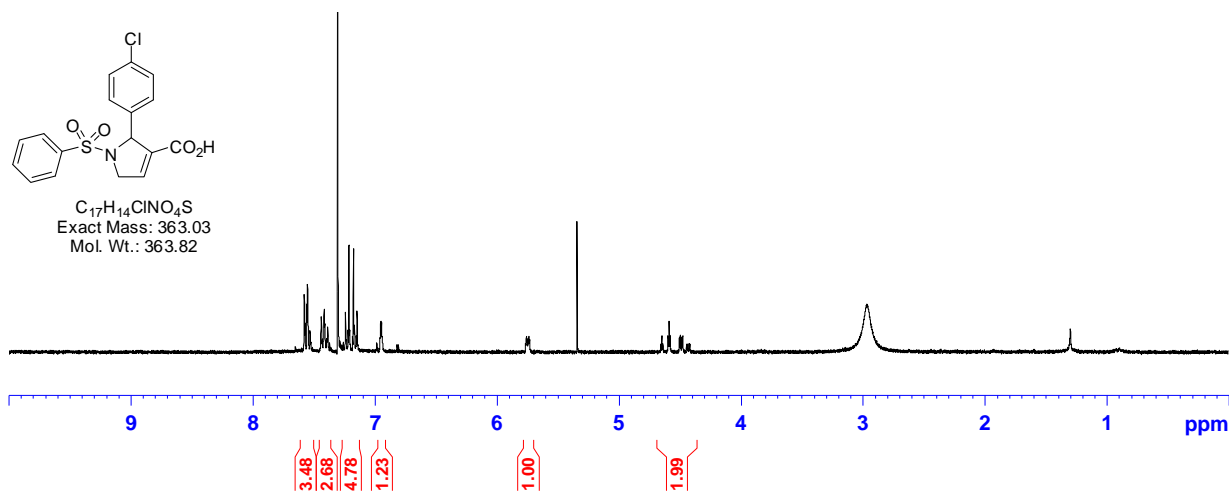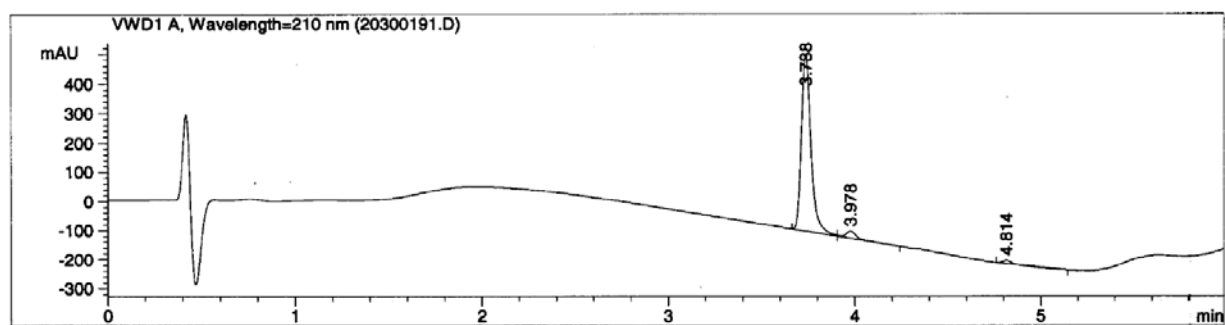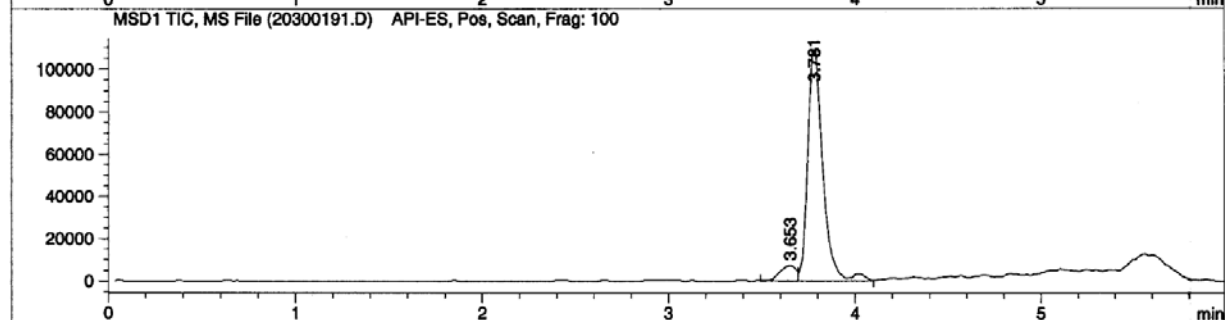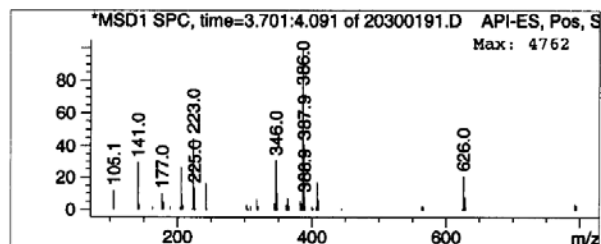

**1-(4-Chlorophenylsulfonyl)-2-(*p*-tolyl)-2,5-dihydro-1H-pyrrole-3-carboxylic acid (A01C30)**

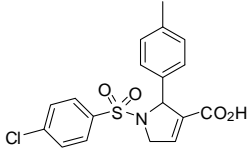

C<sub>18</sub>H<sub>16</sub>ClNO<sub>4</sub>S  
 Exact Mass: 377.05  
 Mol. Wt.: 377.84

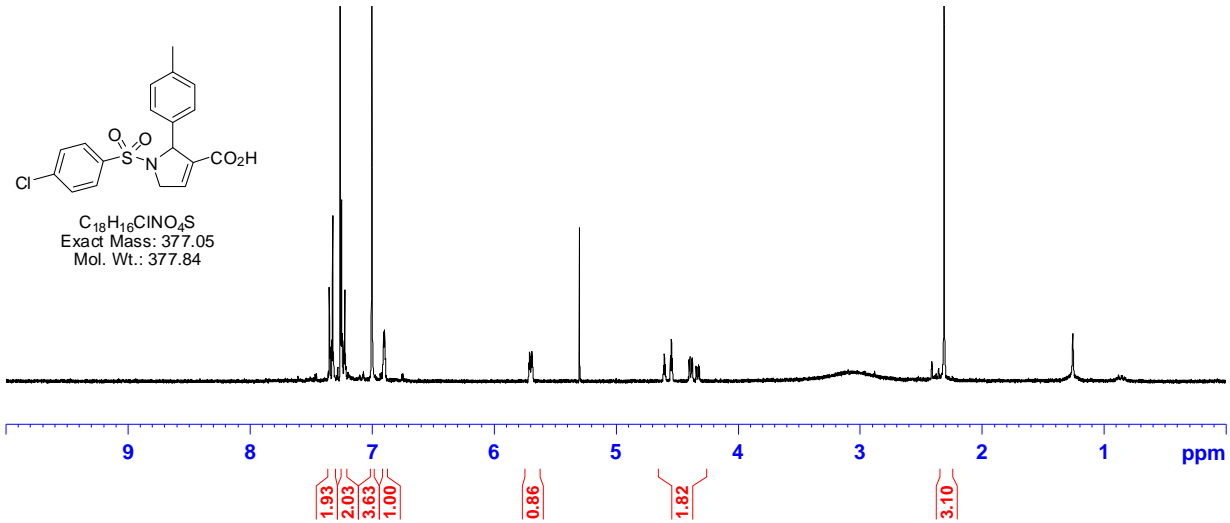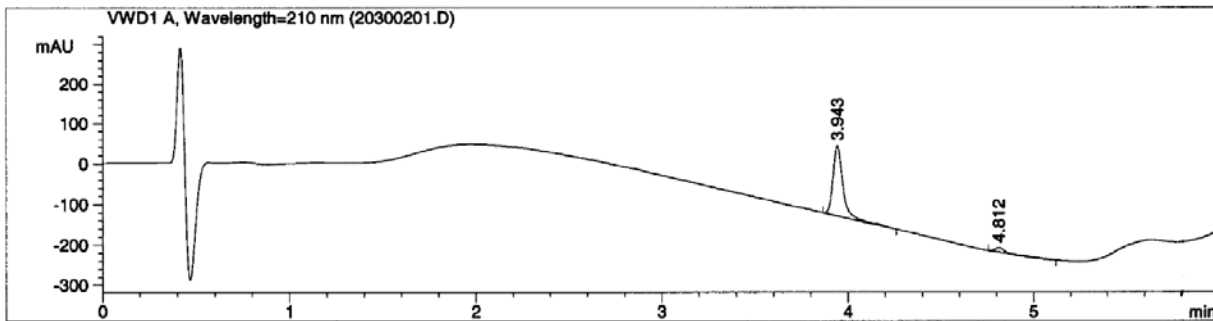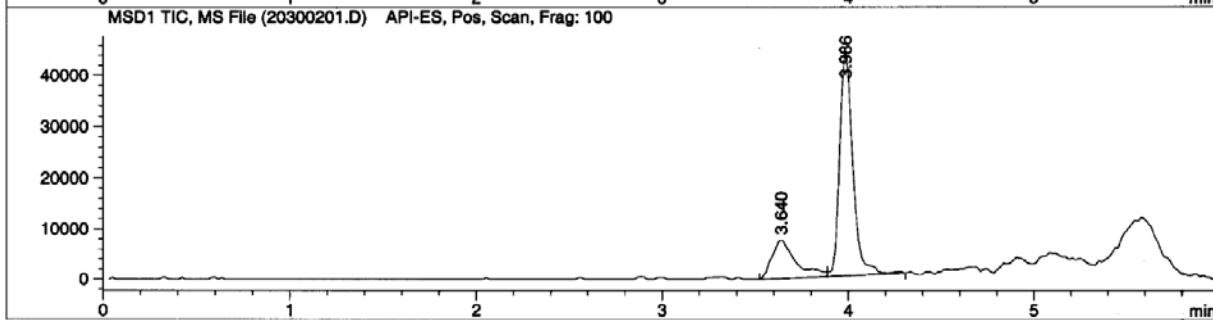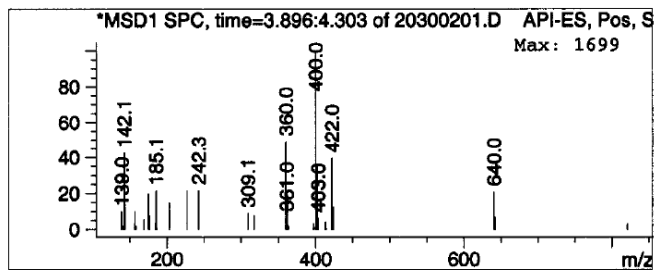

**2-(4-Chlorophenyl)-1-(2-(methoxycarbonyl)phenylsulfonyl)-2,5-dihydro-1H-pyrrole-3-carboxylic acid (A01C31)**

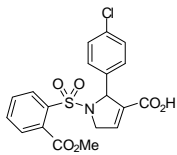

C<sub>19</sub>H<sub>16</sub>ClNO<sub>5</sub>S  
 Exact Mass: 421.04  
 Mol. Wt.: 421.85

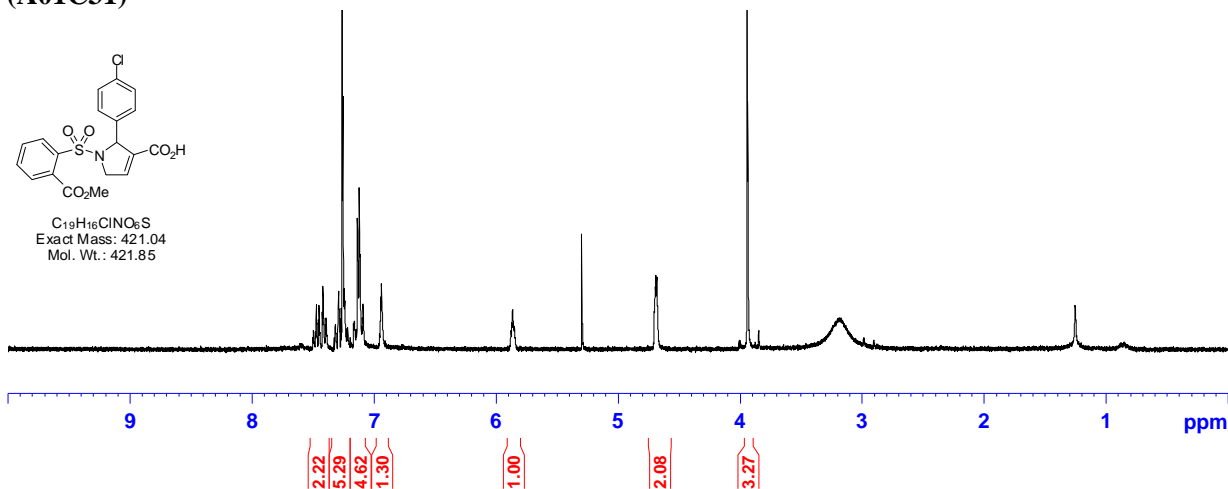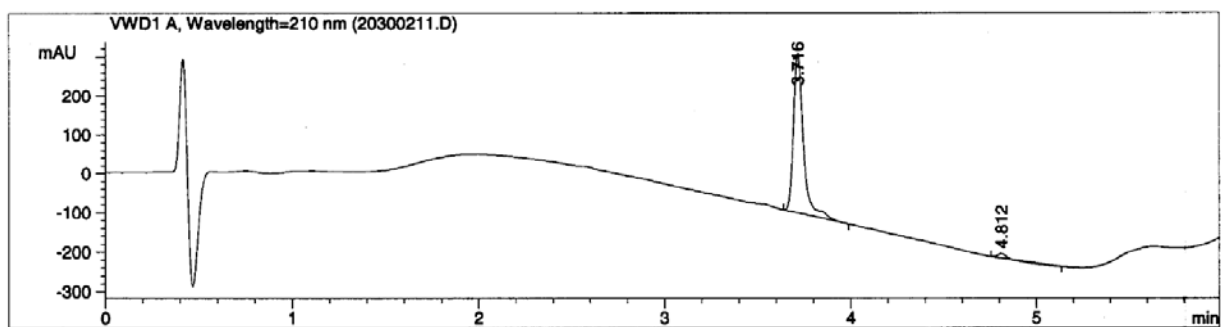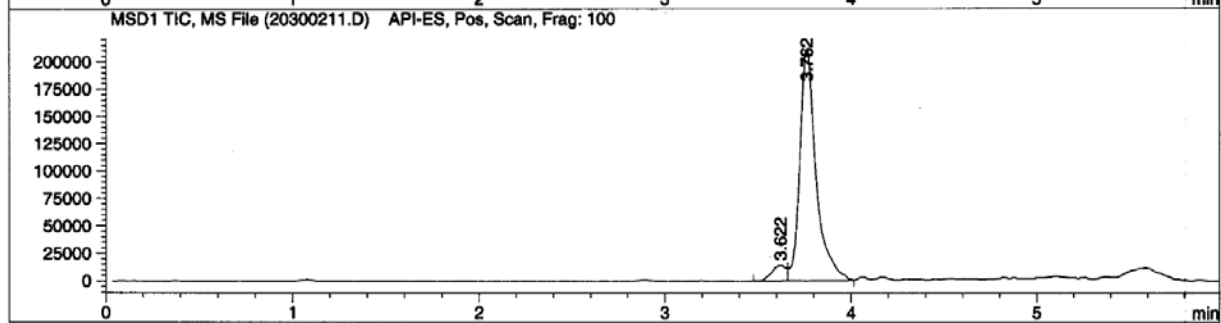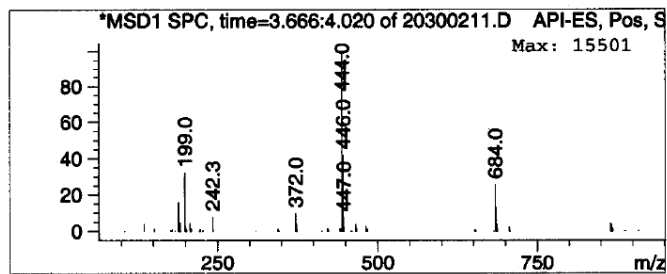



**2-(*m*-Tolyl)-1-tosyl-2,5-dihydro-1*H*-pyrrole-3-carboxylic acid (A01C33)**

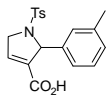

C<sub>19</sub>H<sub>19</sub>NO<sub>4</sub>S  
 Exact Mass: 357.1  
 Mol. Wt.: 357.42

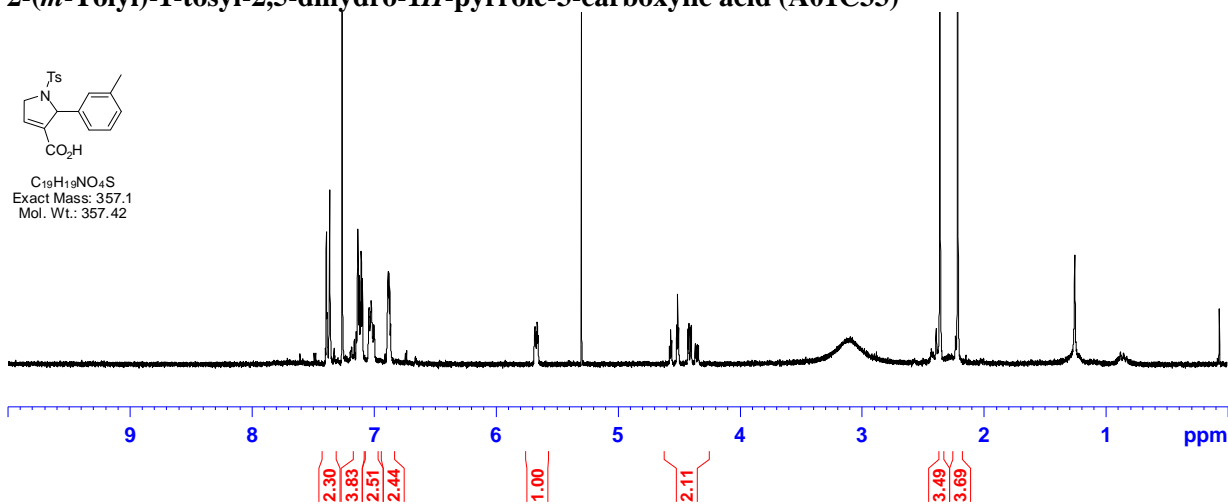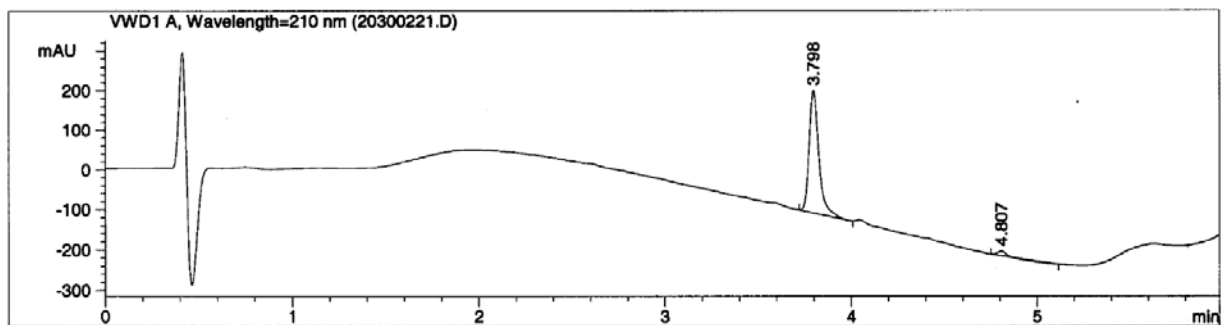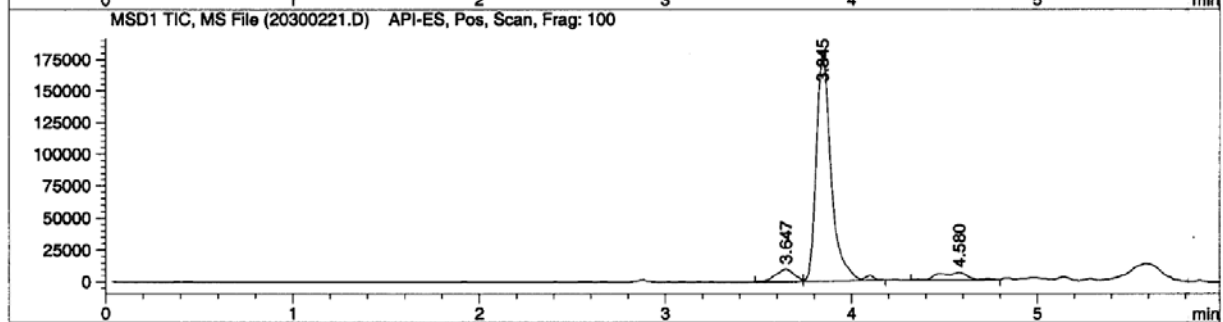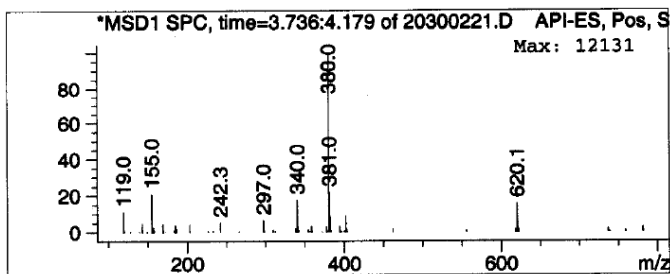

**1-(2-(Methoxycarbonyl)phenylsulfonyl)-2-(4-methoxyphenyl)-2,5-dihydro-1H-pyrrole-3-carboxylic acid (A01C34)**

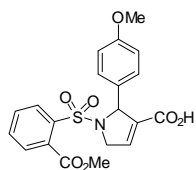

Chemical Formula: C<sub>20</sub>H<sub>19</sub>NO<sub>7</sub>S  
Exact Mass: 417.09  
Molecular Weight: 417.43

Not included

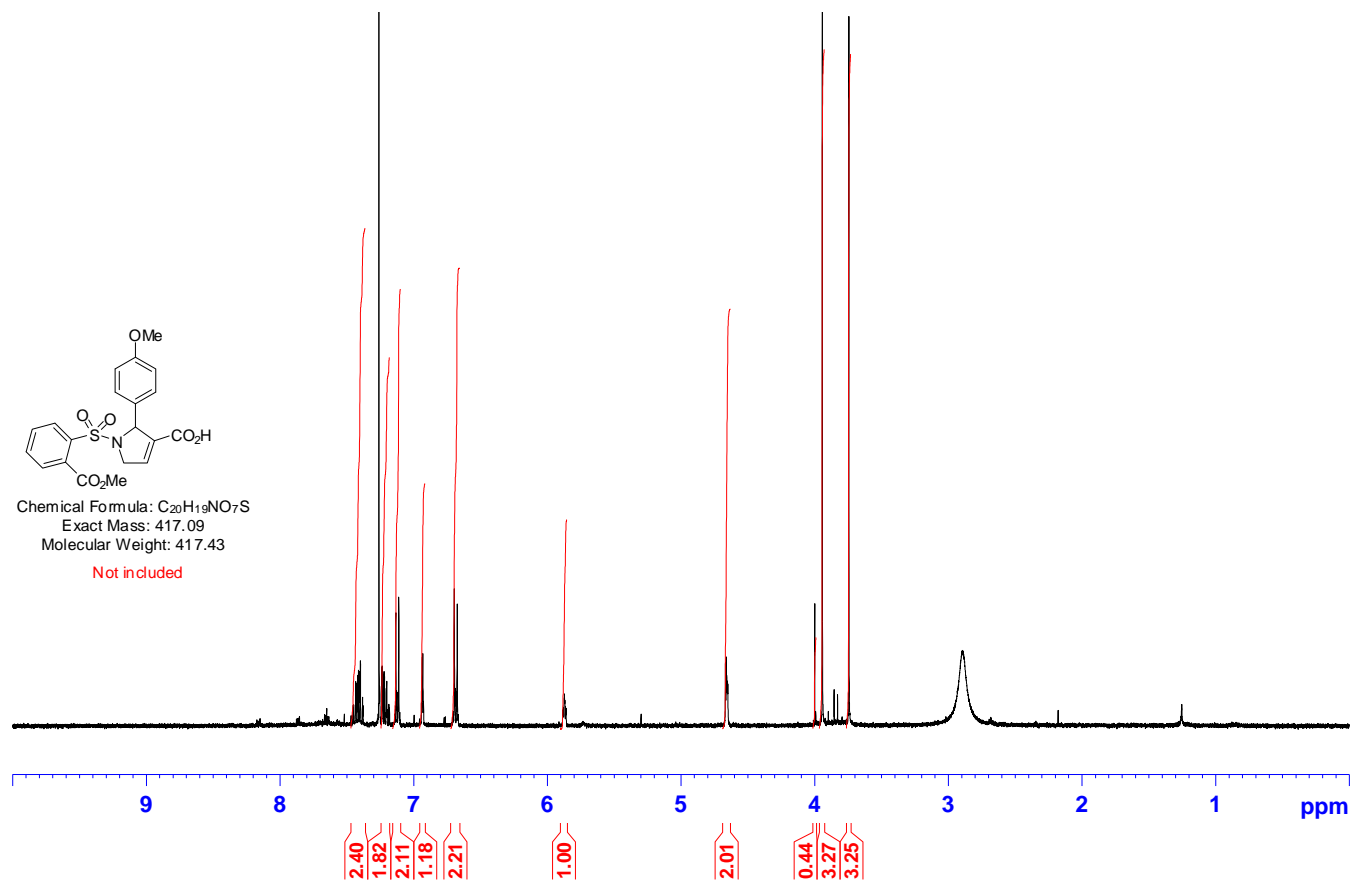

2-(4-Methoxyphenyl)-1-(phenylsulfonyl)-2,5-dihydro-1H-pyrrole-3-carboxylic acid (A01C35)

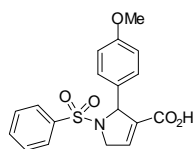

Chemical Formula: C<sub>18</sub>H<sub>17</sub>NO<sub>5</sub>S  
Exact Mass: 359.08  
Molecular Weight: 359.40

Not included

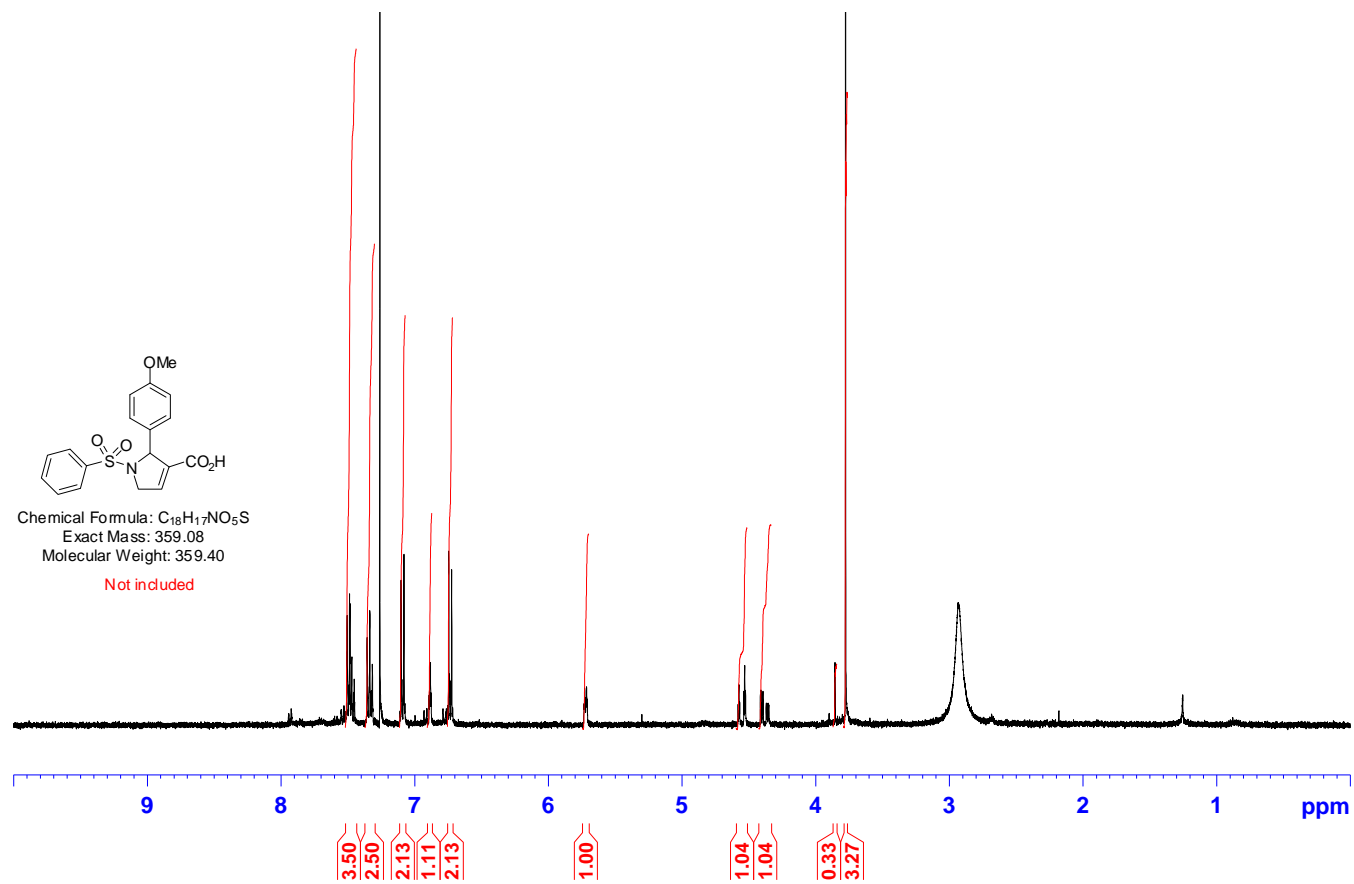

# 1-(2-Nitrophenylsulfonyl)-2-(*p*-tolyl)-2,5-dihydro-1H-pyrrole-3-carboxylic acid (A01C36)

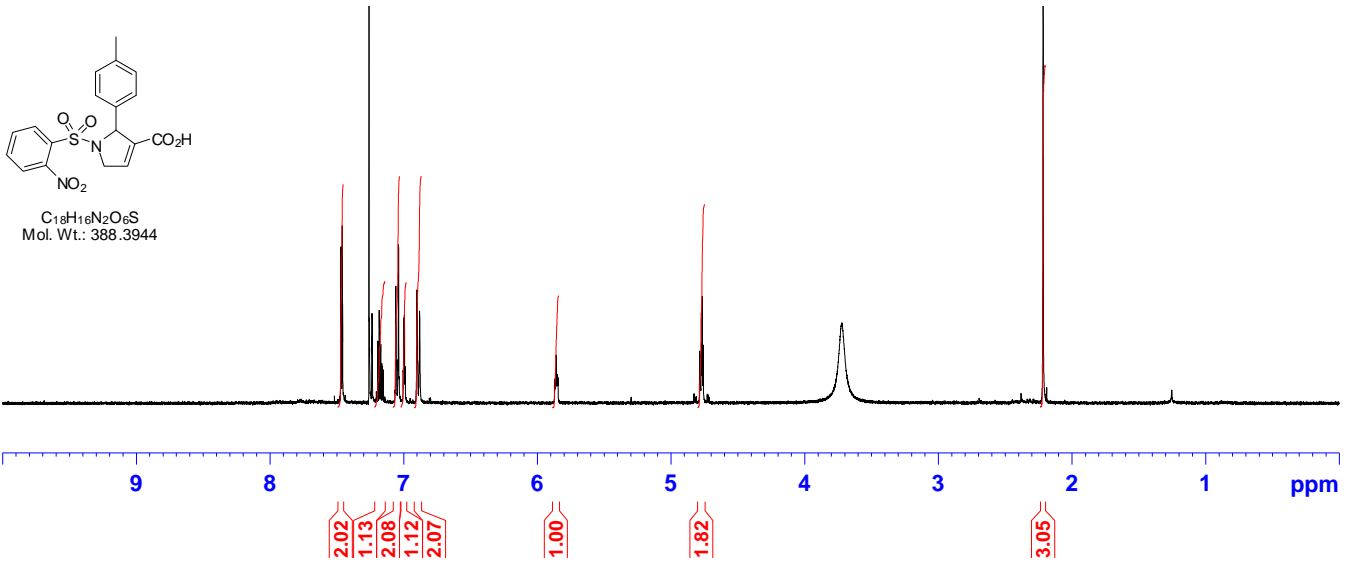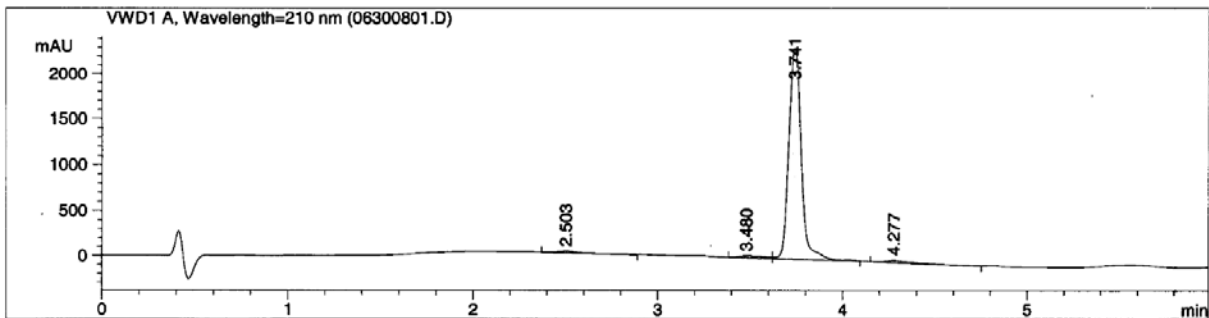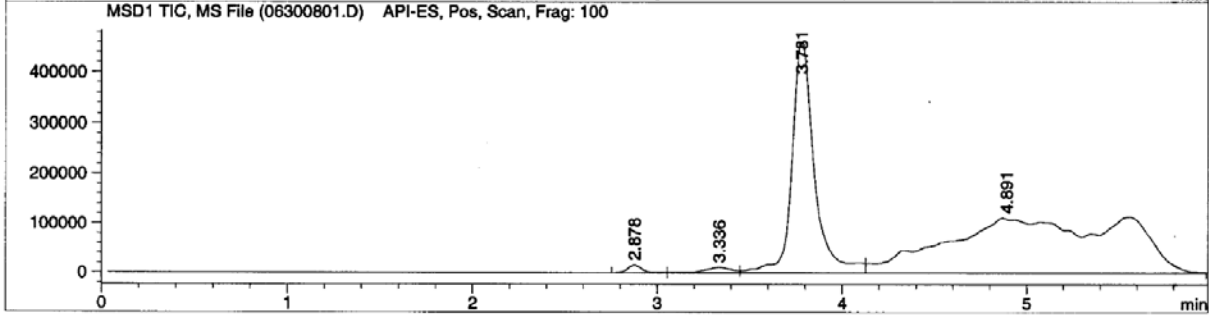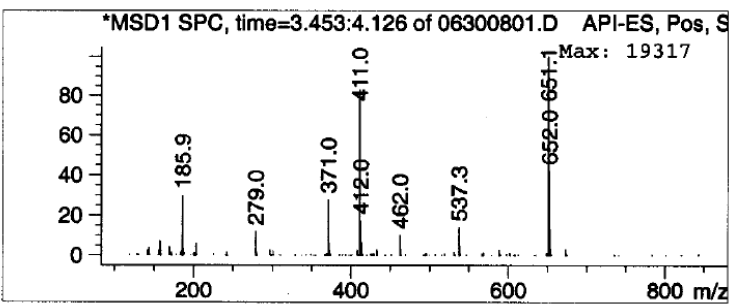

1-(4-Chlorophenylsulfonyl)-2-(4-methoxyphenyl)-2,5-dihydro-1H-pyrrole-3-carboxylic acid (A01C37)

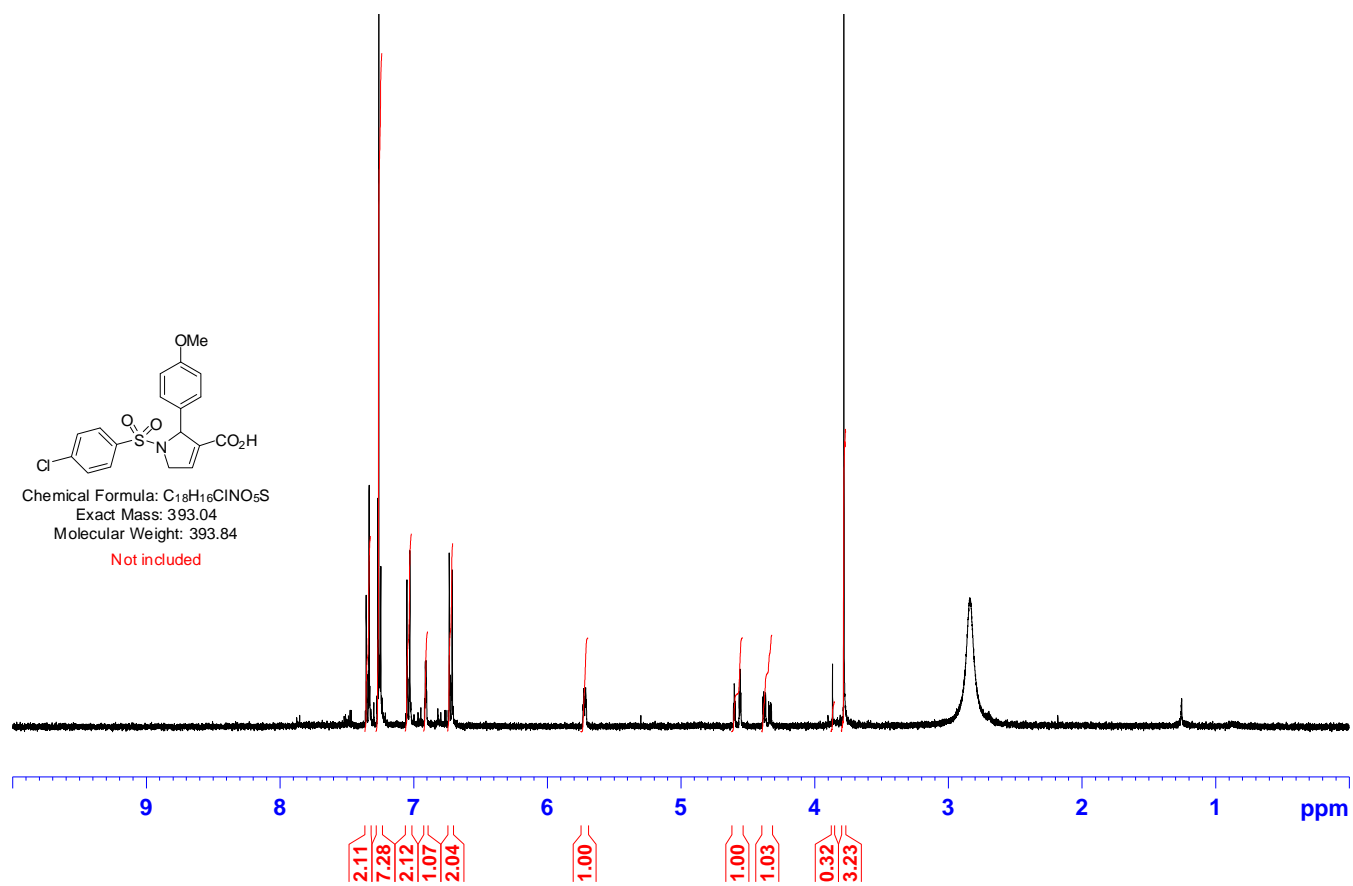

2-(4-Methoxyphenyl)-1-(*o*-tolylsulfonyl)-2,5-dihydro-1H-pyrrole-3-carboxylic acid (A01C38)

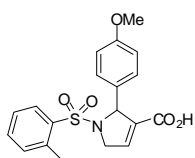

Chemical Formula: C<sub>19</sub>H<sub>19</sub>NO<sub>5</sub>S  
Exact Mass: 373.10  
Molecular Weight: 373.42

Not included

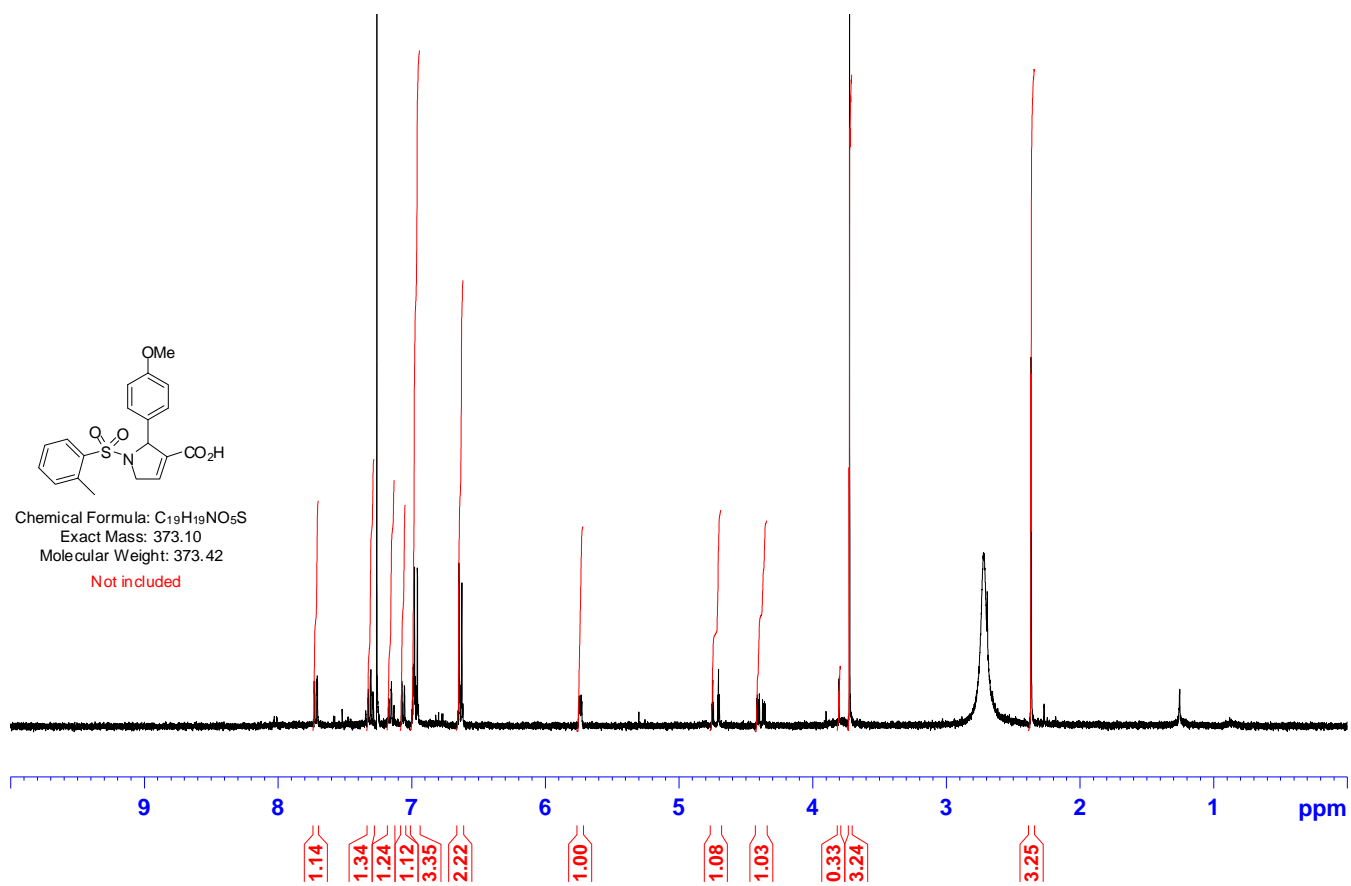

# 2-(3-Methoxyphenyl)-1-tosyl-2,5-dihydro-1H-pyrrole-3-carboxylic acid (A01C39)

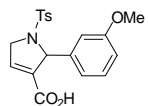

Chemical Formula: C<sub>19</sub>H<sub>19</sub>NO<sub>5</sub>S  
Exact Mass: 373.10  
Molecular Weight: 373.42  
Not included

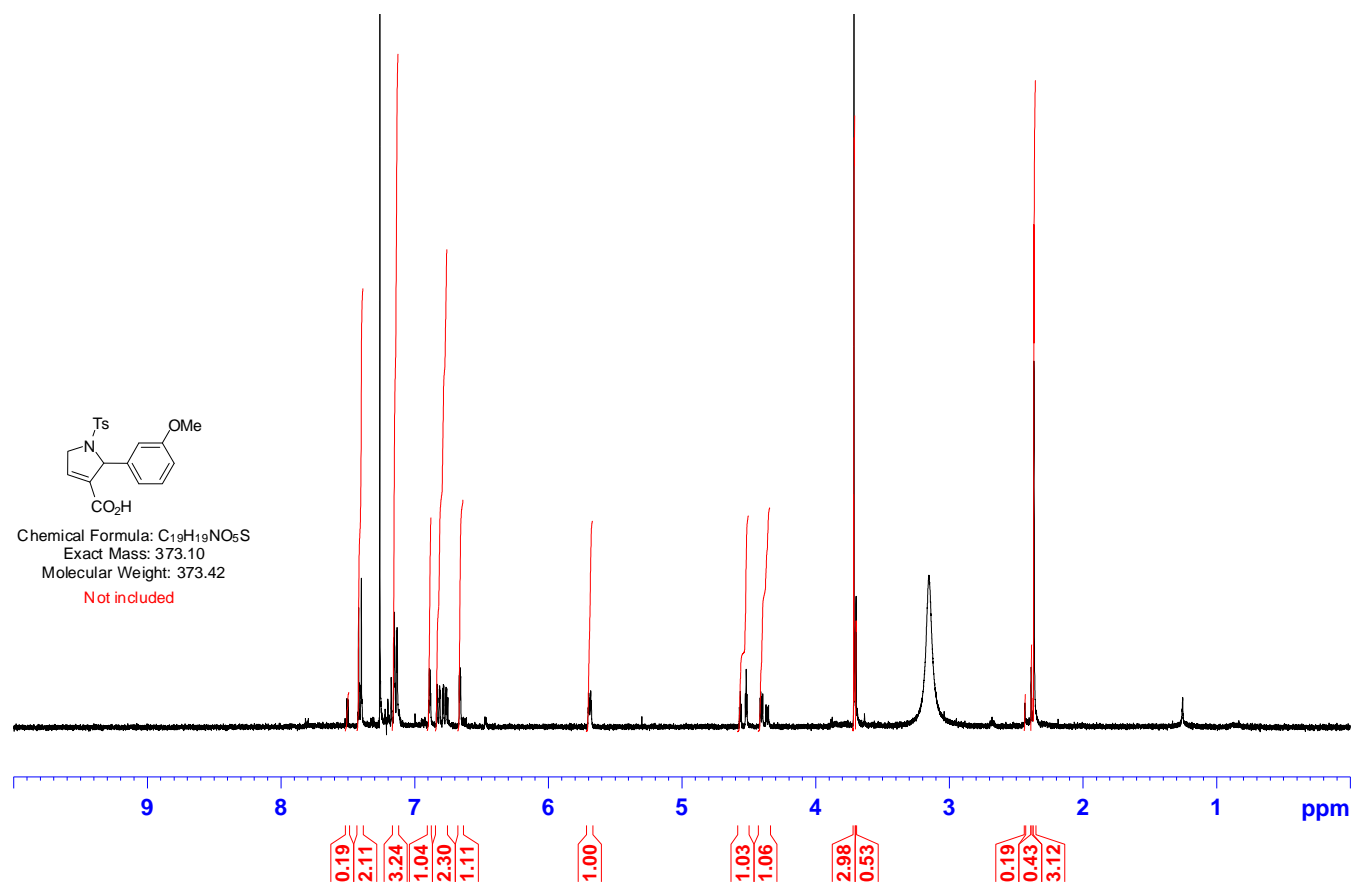

2-(4-Chlorophenyl)-1-(*o*-tolylsulfonyl)-2,5-dihydro-1H-pyrrole-3-carboxylic acid (A01C40)

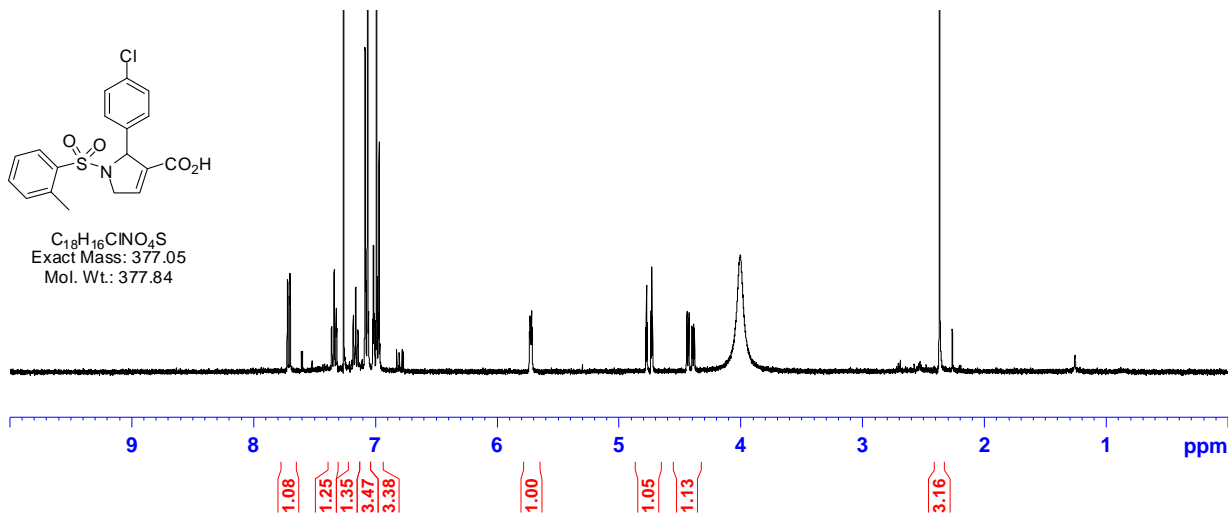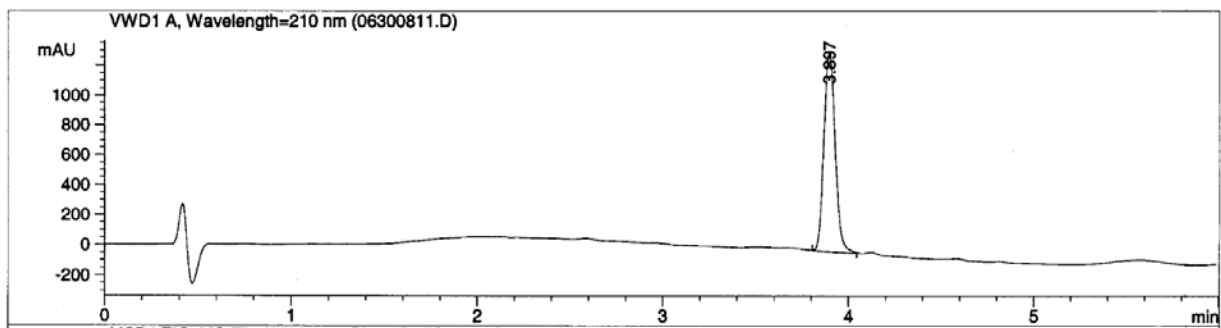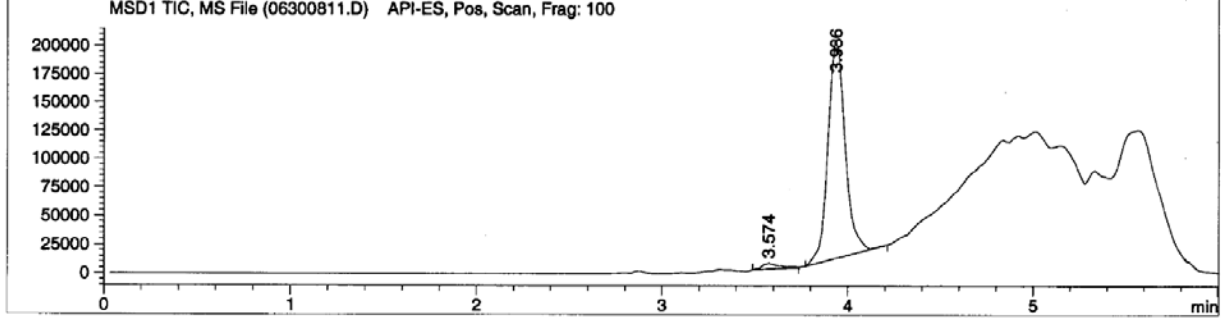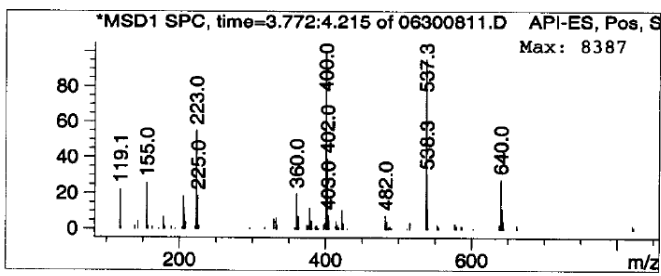



2-(*p*-Tolyl)-1-(*o*-tolylsulfonyl)-2,5-dihydro-1H-pyrrole-3-carboxylic acid (A01C41)

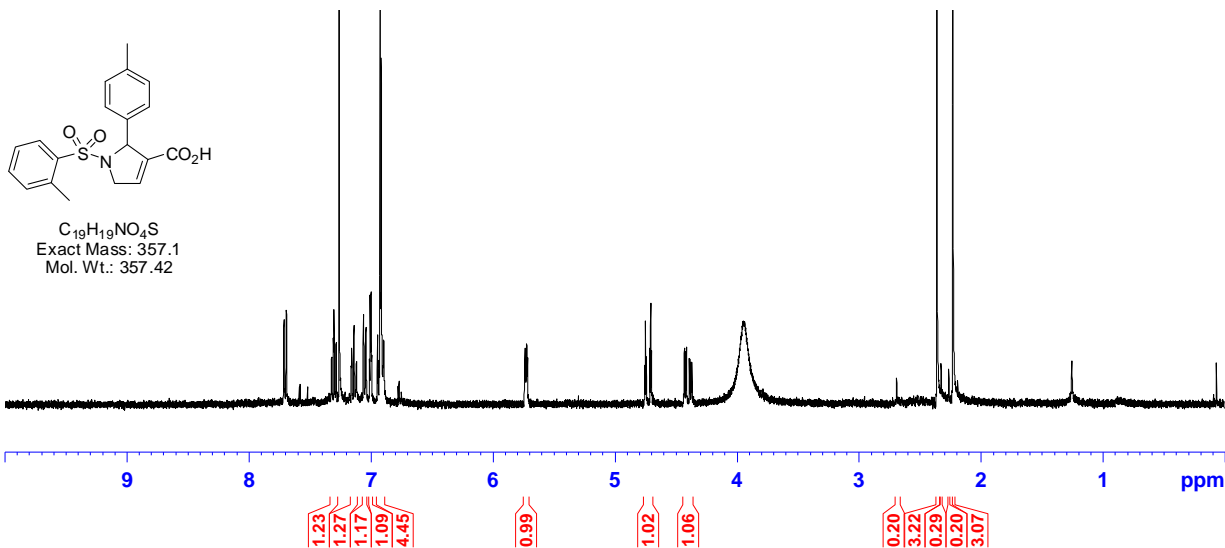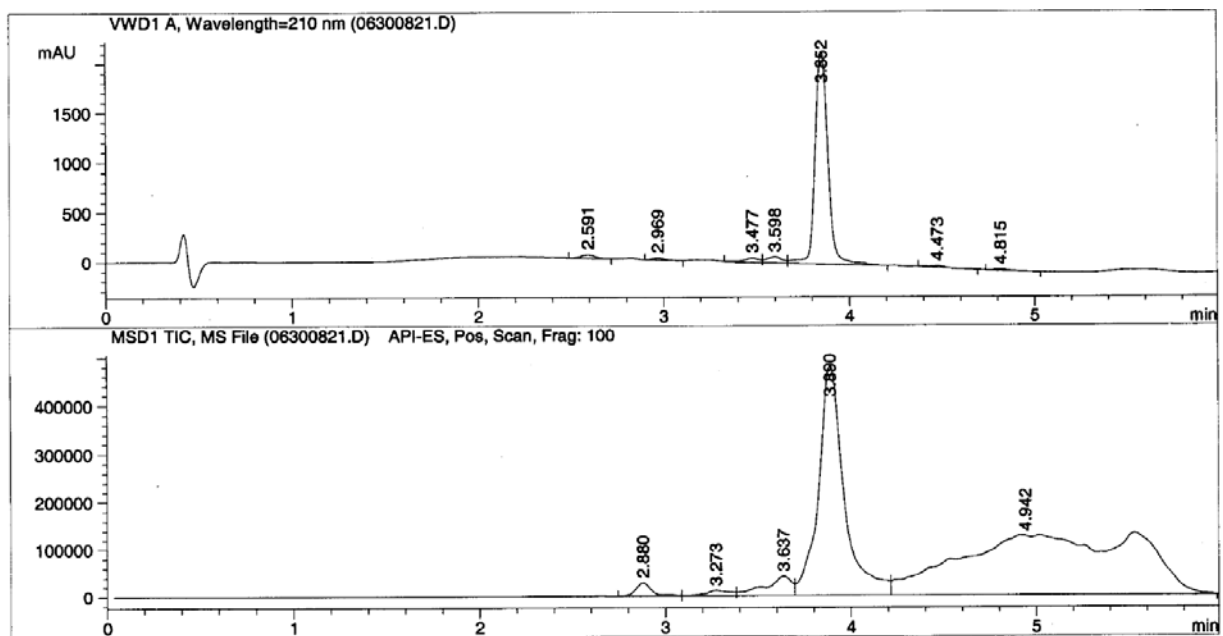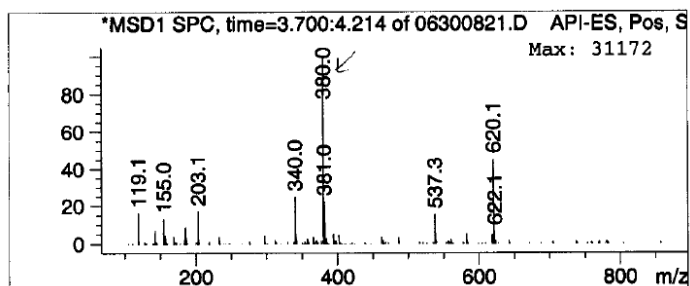

1-(2-(Methoxycarbonyl)phenylsulfonyl)-2-(*p*-tolyl)-2,5-dihydro-1H-pyrrole-3-carboxylic acid (A01C42)

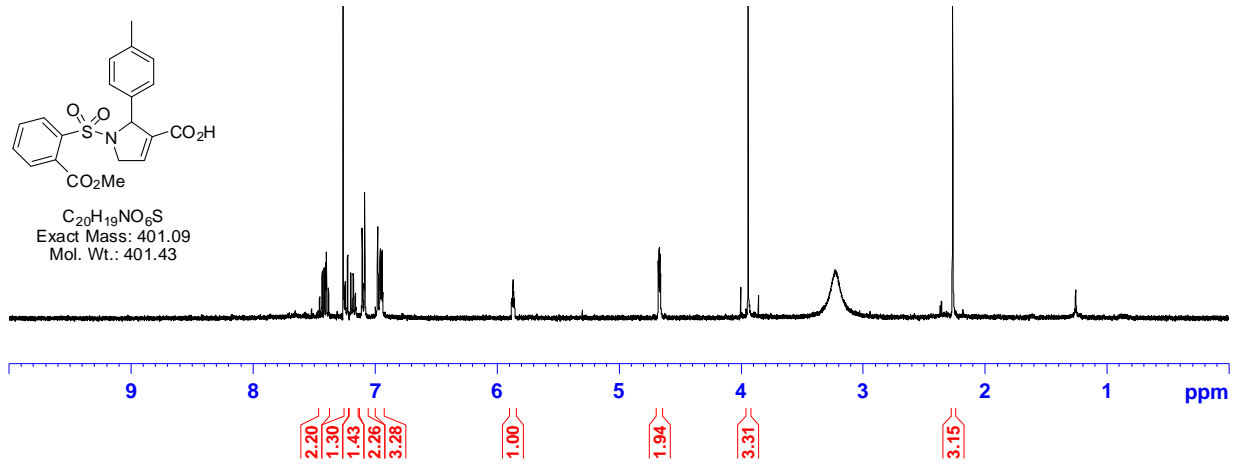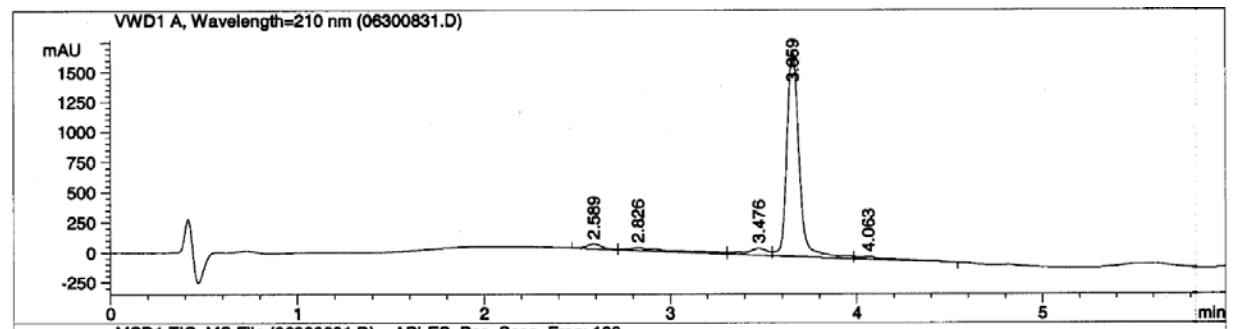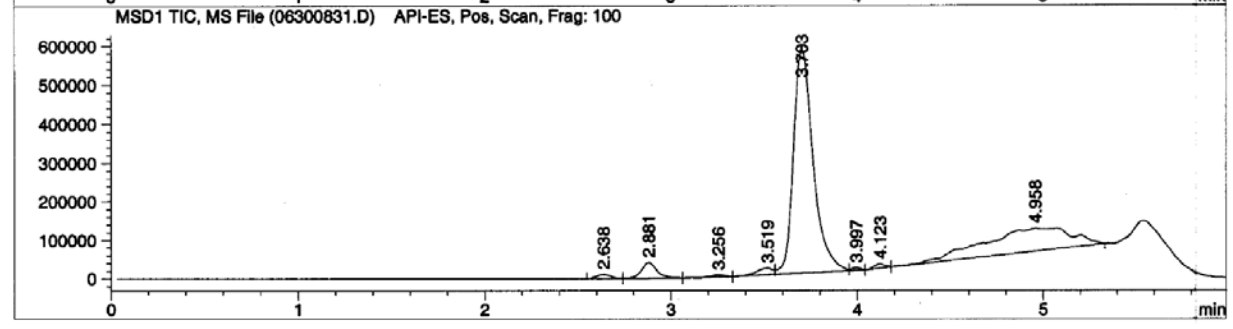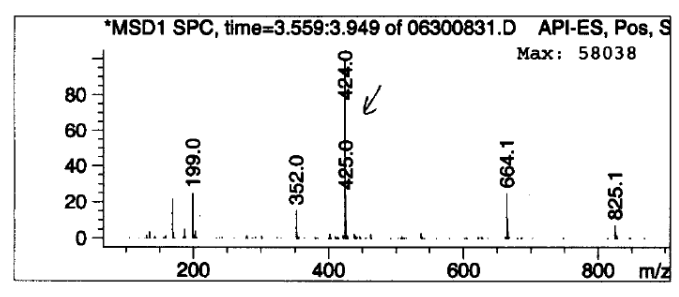

# 1-(Phenylsulfonyl)-2-(*p*-tolyl)-2,5-dihydro-1H-pyrrole-3-carboxylic acid (A01C43)

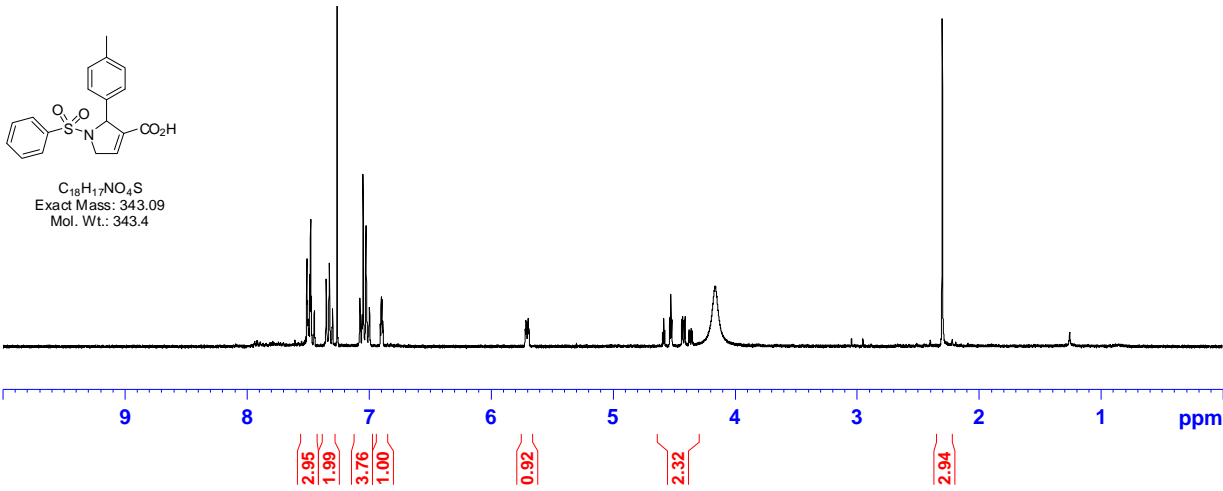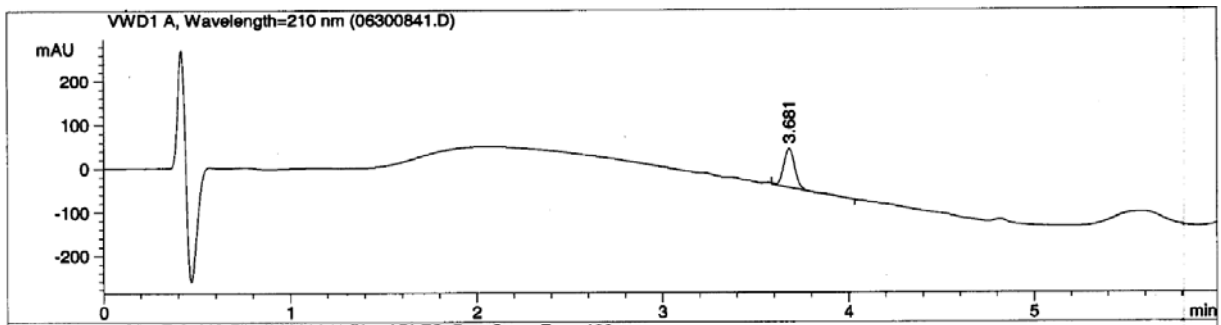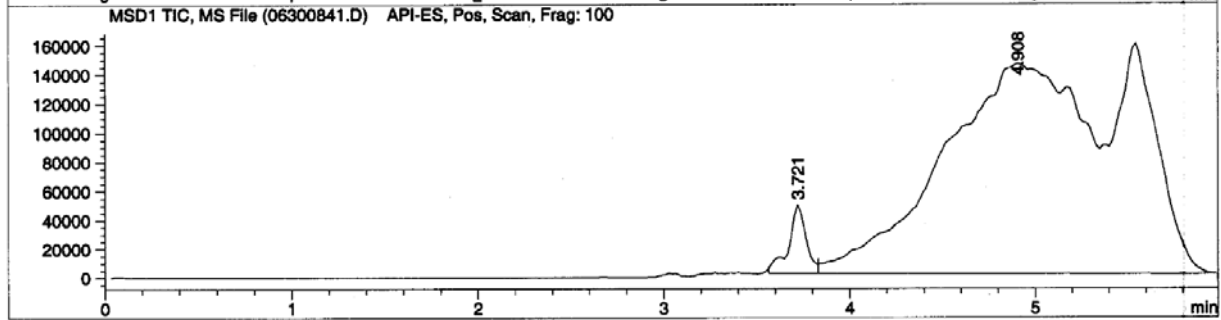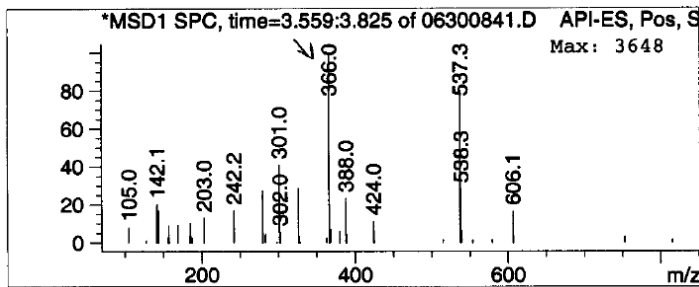

**1-(4-Nitrophenylsulfonyl)-2-(*p*-tolyl)-2,5-dihydro-1H-pyrrole-3-carboxylic acid (A01C44)**

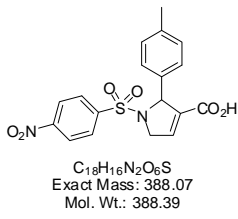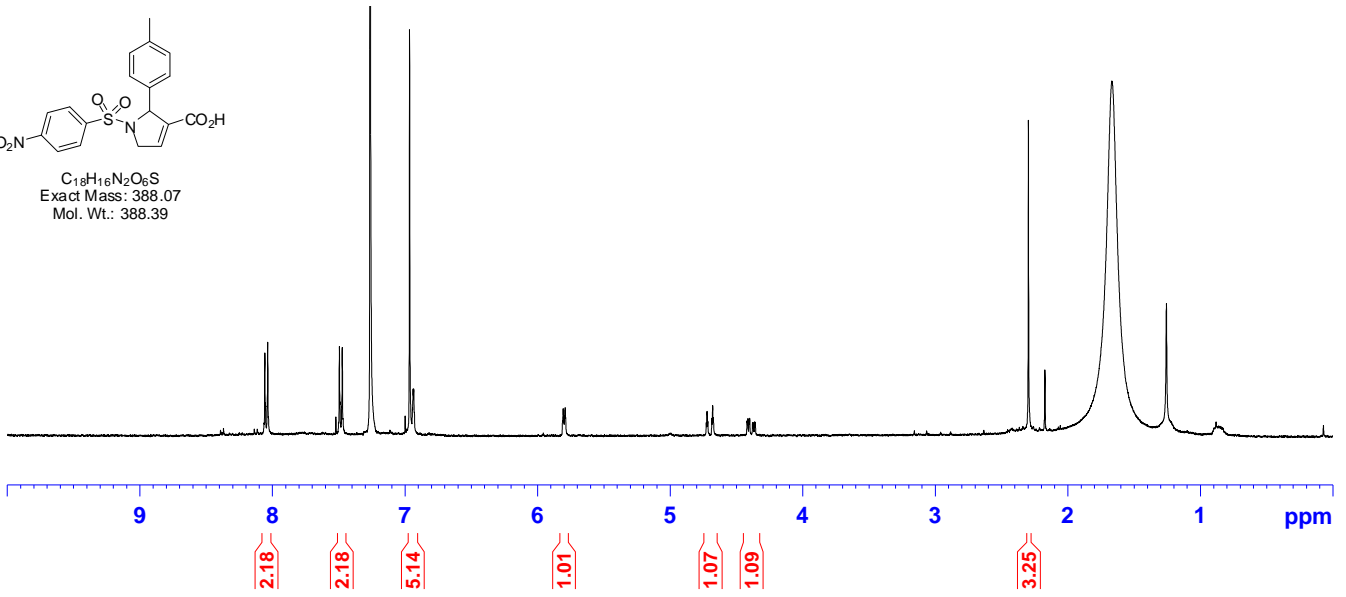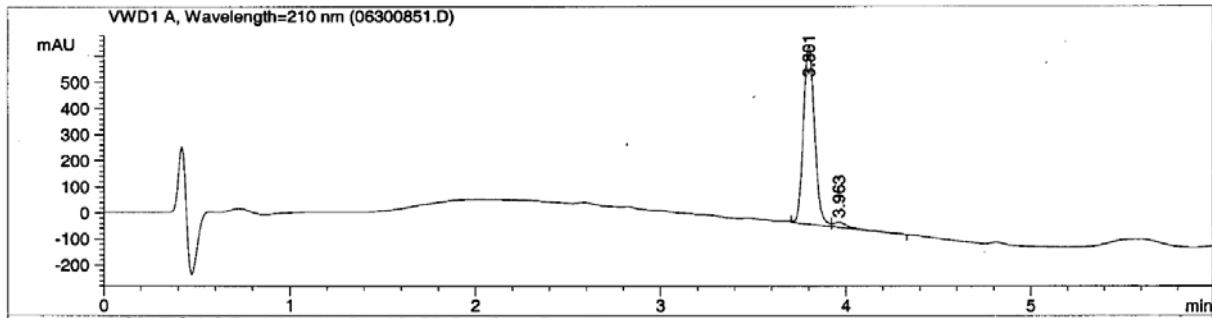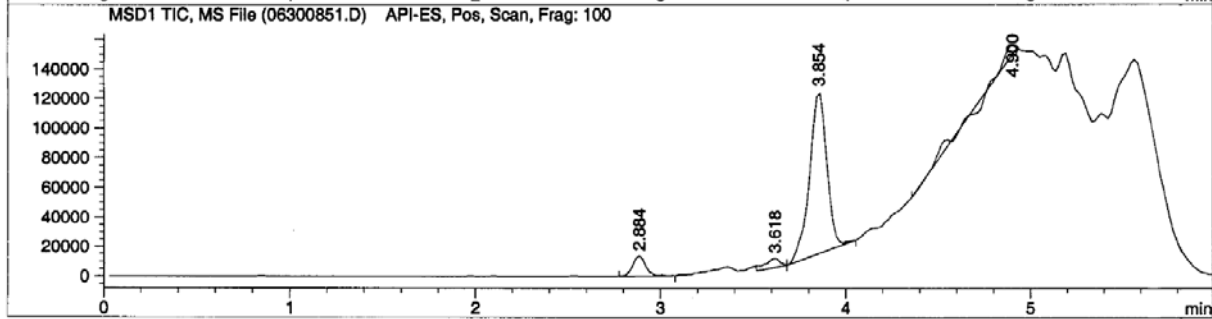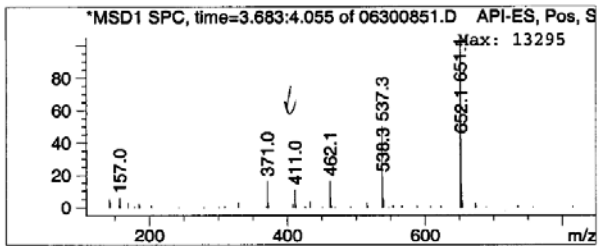

# 1-(Methylsulfonyl)-2-(*p*-tolyl)-2,5-dihydro-1H-pyrrole-3-carboxylic acid (A01C46)

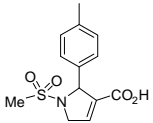

C<sub>13</sub>H<sub>15</sub>NO<sub>4</sub>S  
Exact Mass: 281.07  
Mol. Wt.: 281.33

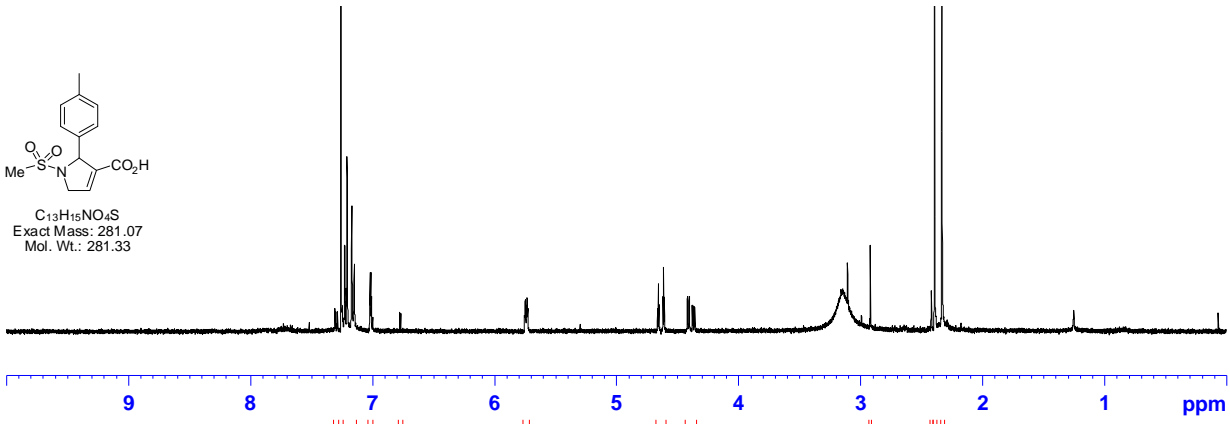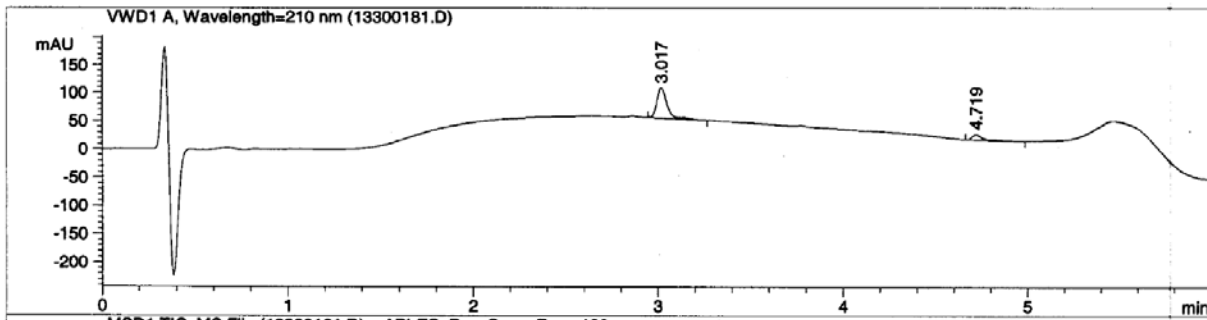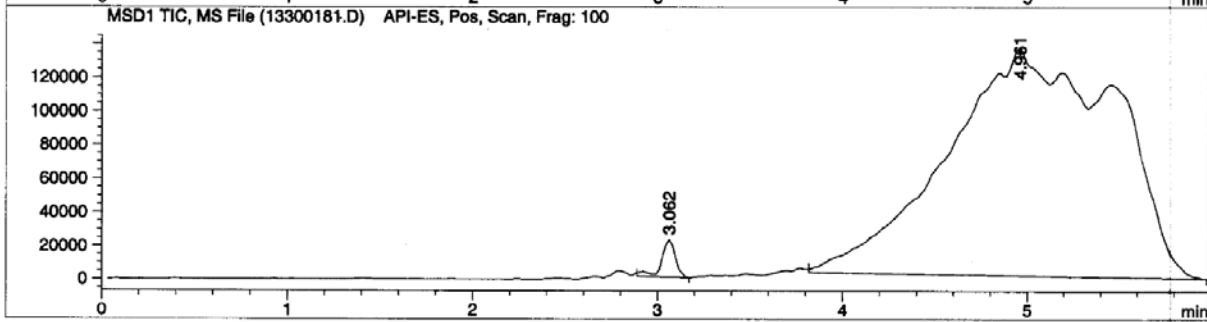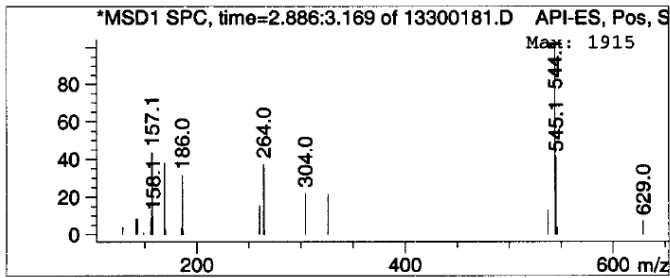

# Spectral Data for Table 4

## 5-Methyl-2-(*p*-tolyl)-1-tosyl-2,5-dihydro-1H-pyrrole-3-carboxylic acid (A02C02)

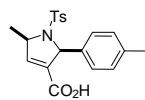

C<sub>20</sub>H<sub>21</sub>NO<sub>4</sub>S  
Exact Mass: 371.12  
Mol. Wt.: 371.45

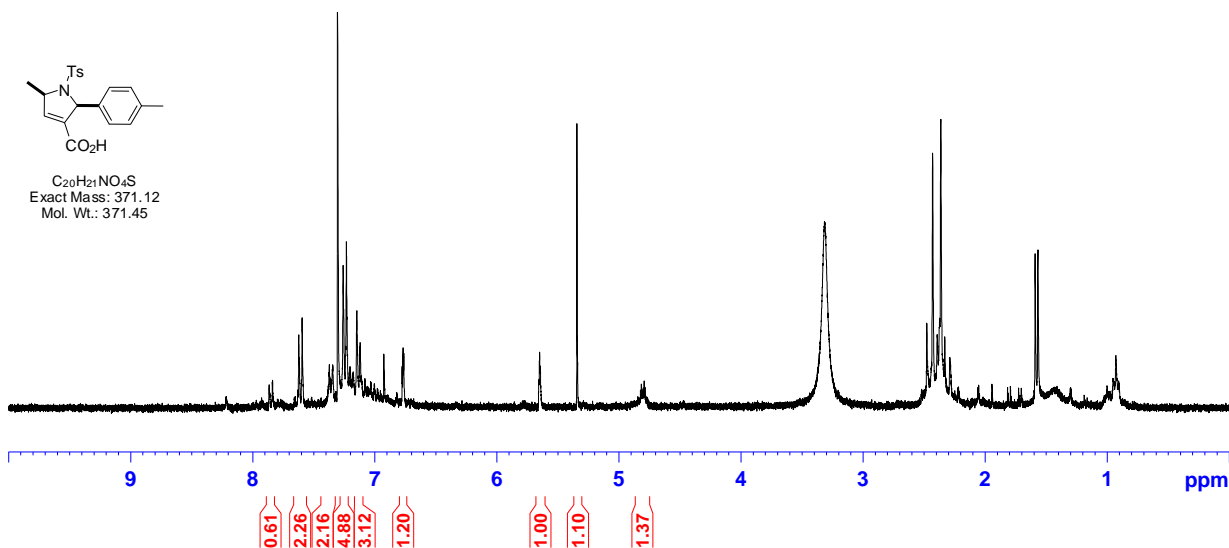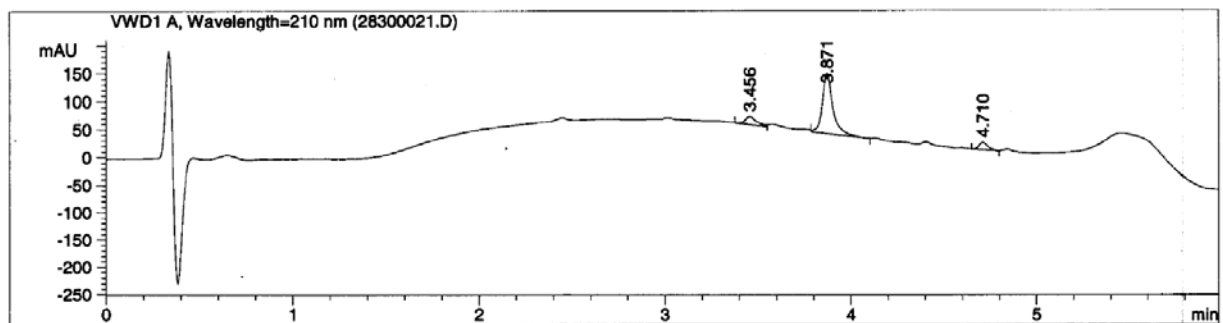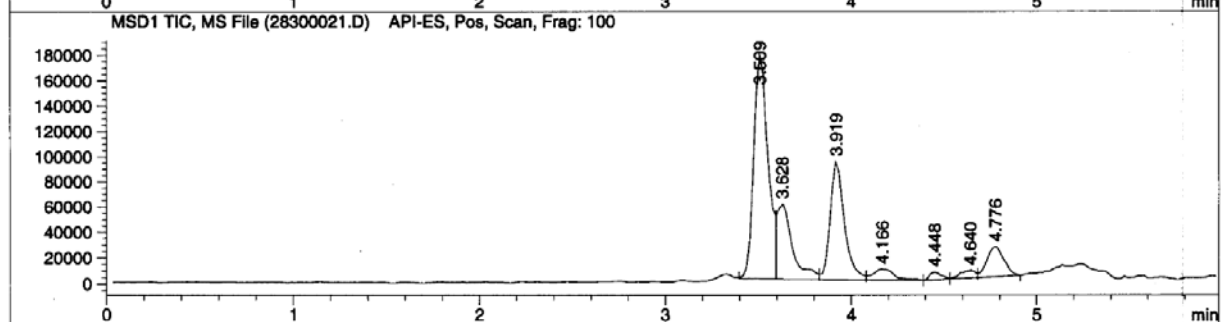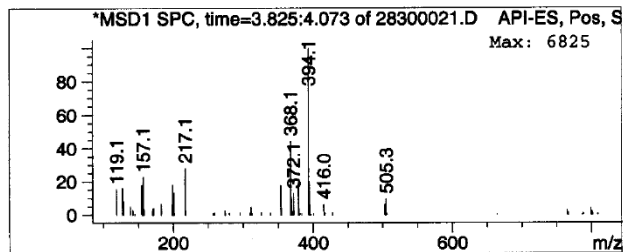

5-(*Tert*-butyl)-2-(*p*-tolyl)-1-tosyl-2,5-dihydro-1H-pyrrole-3-carboxylic acid (A03C02)

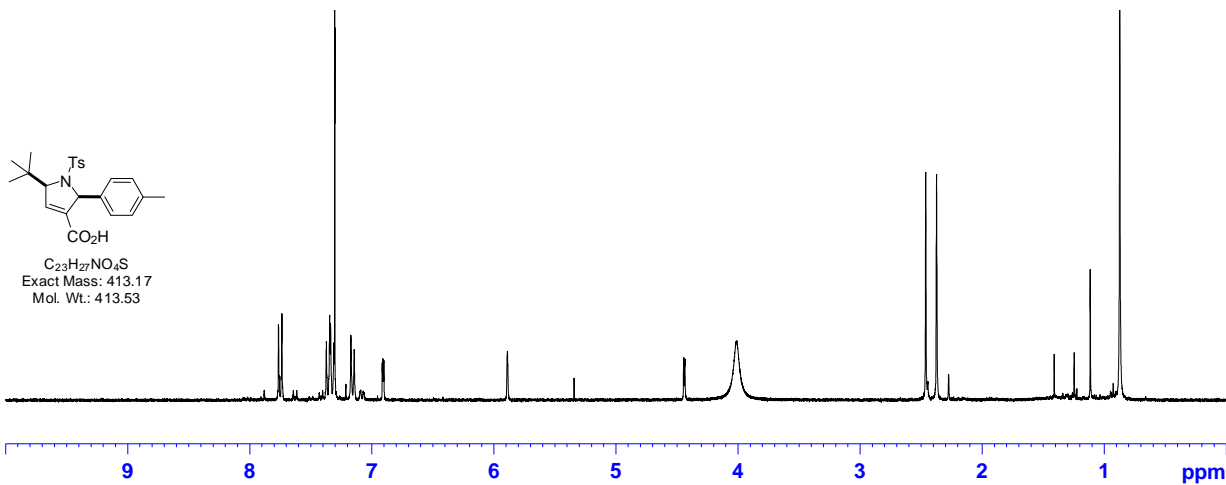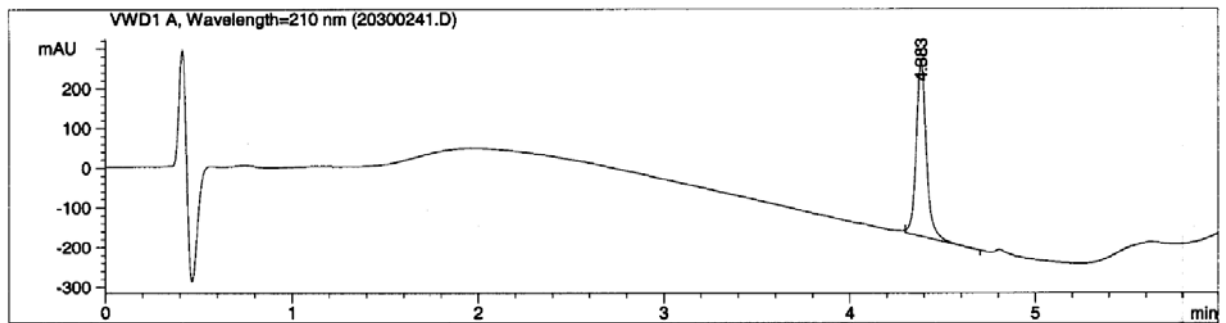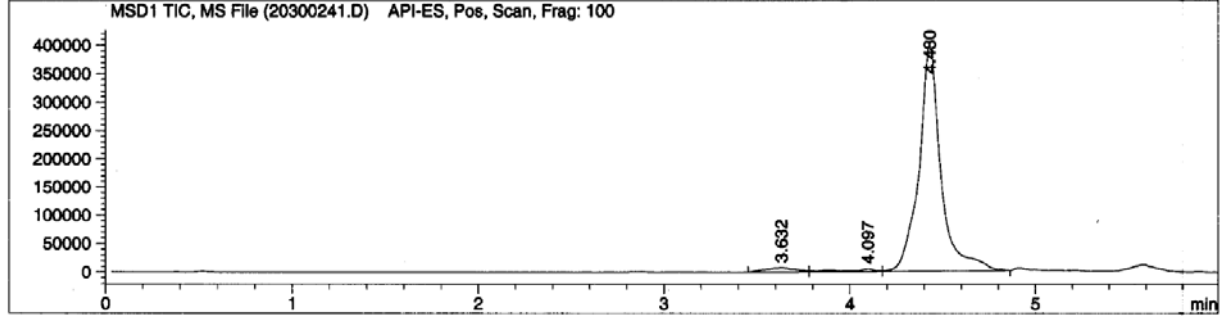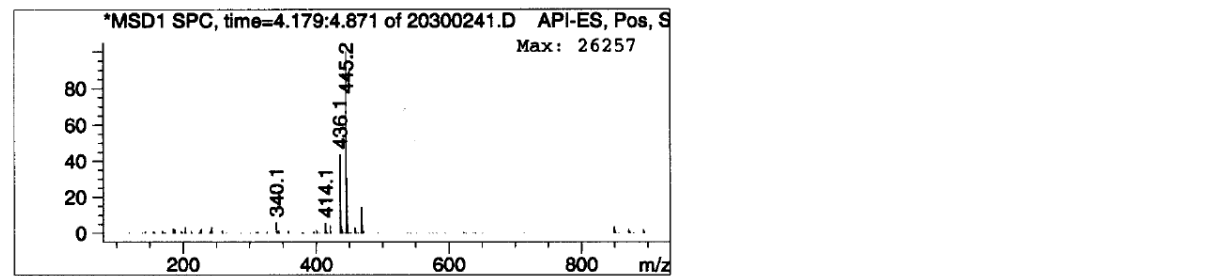

# 5-Phenyl-2-(*p*-tolyl)-1-tosyl-2,5-dihydro-1H-pyrrole-3-carboxylic acid (A04C02)

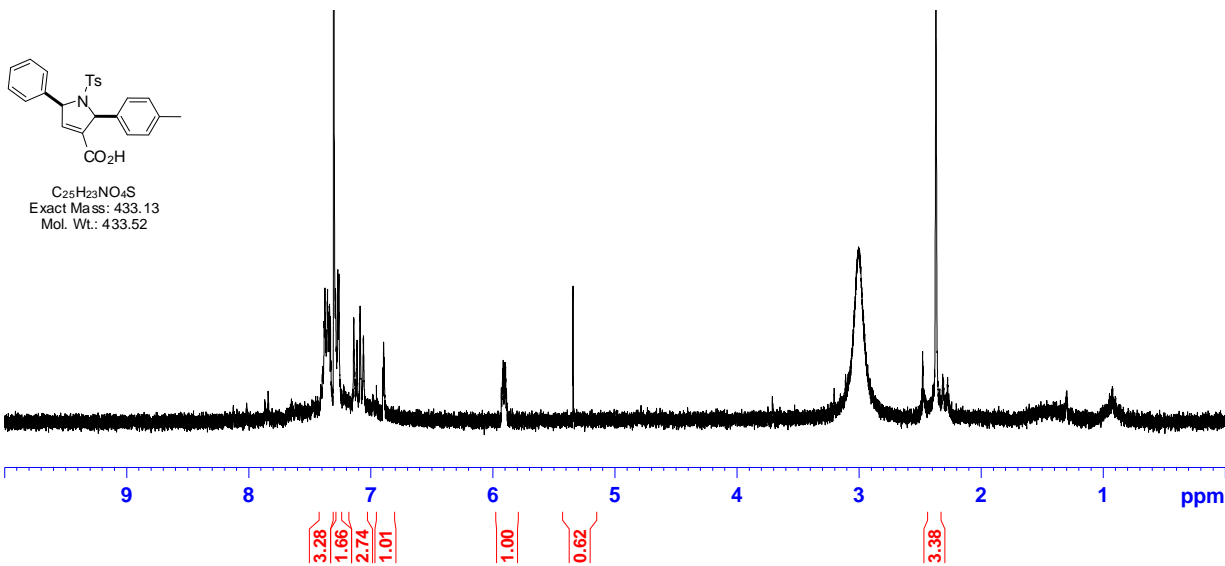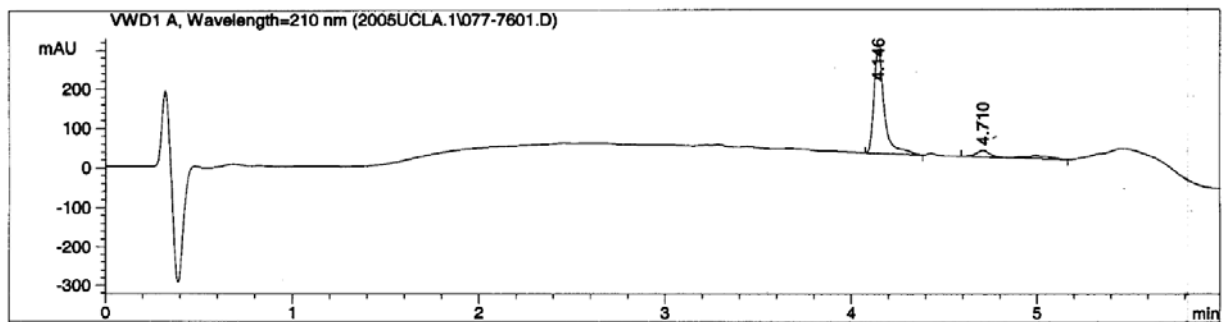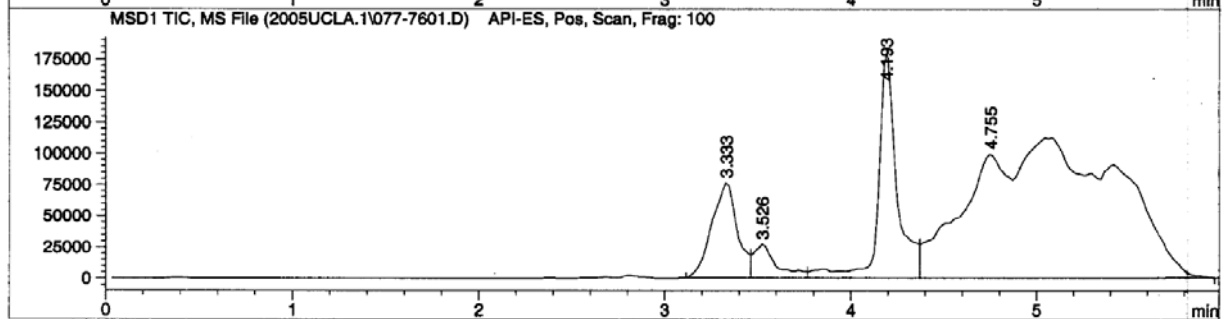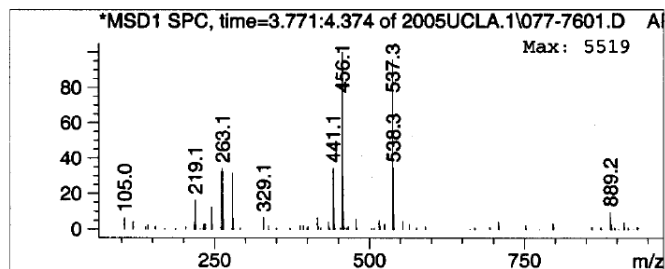



5-Ethyl-2-(p-tolyl)-1-tosyl-2,5-dihydro-1H-pyrrole-3-carboxylic acid (A05C02)

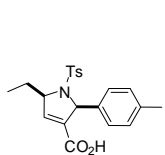

C<sub>21</sub>H<sub>23</sub>NO<sub>4</sub>S  
 Exact Mass: 385.13  
 Mol. Wt.: 385.48

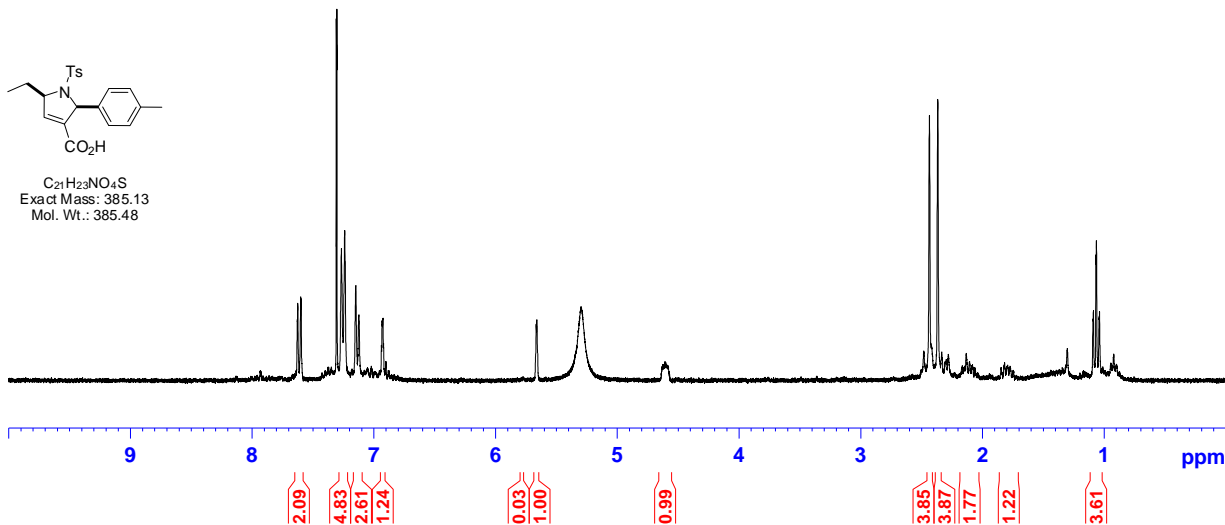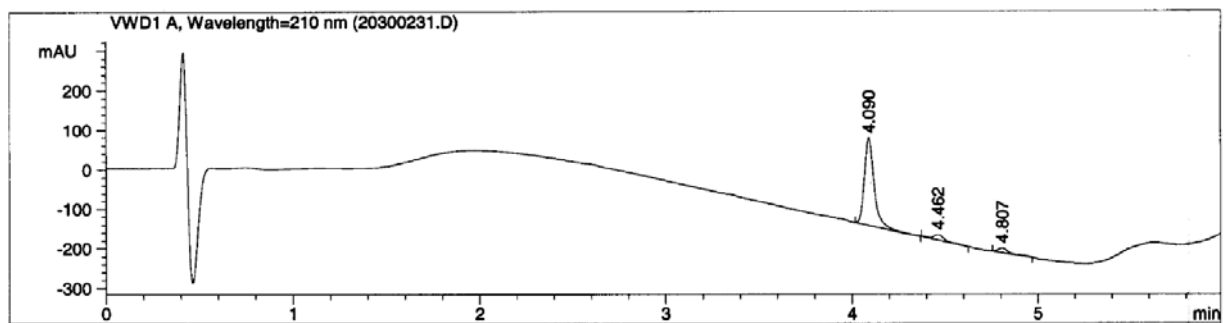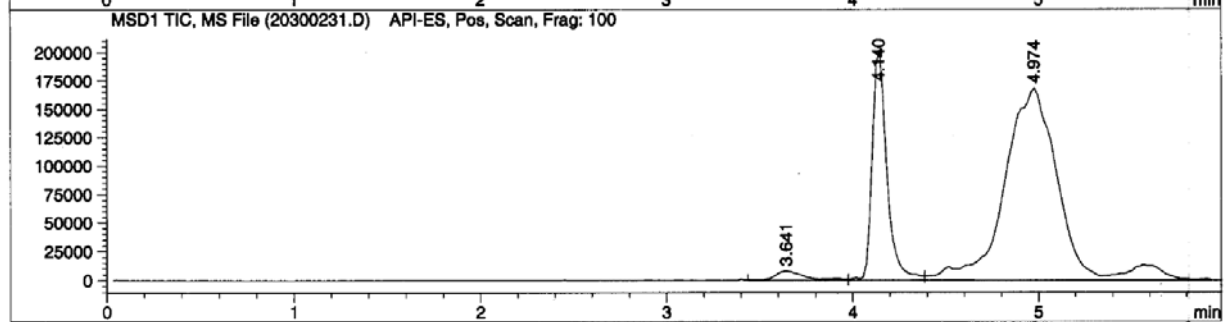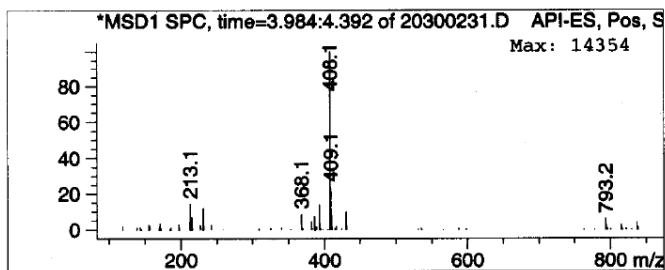

# 5-Isopropyl-2-(*p*-tolyl)-1-tosyl-2,5-dihydro-1H-pyrrole-3-carboxylic acid (A06C02)

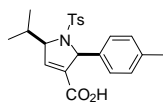

C<sub>22</sub>H<sub>25</sub>NO<sub>4</sub>S  
Exact Mass: 399.15  
Mol. Wt.: 399.5

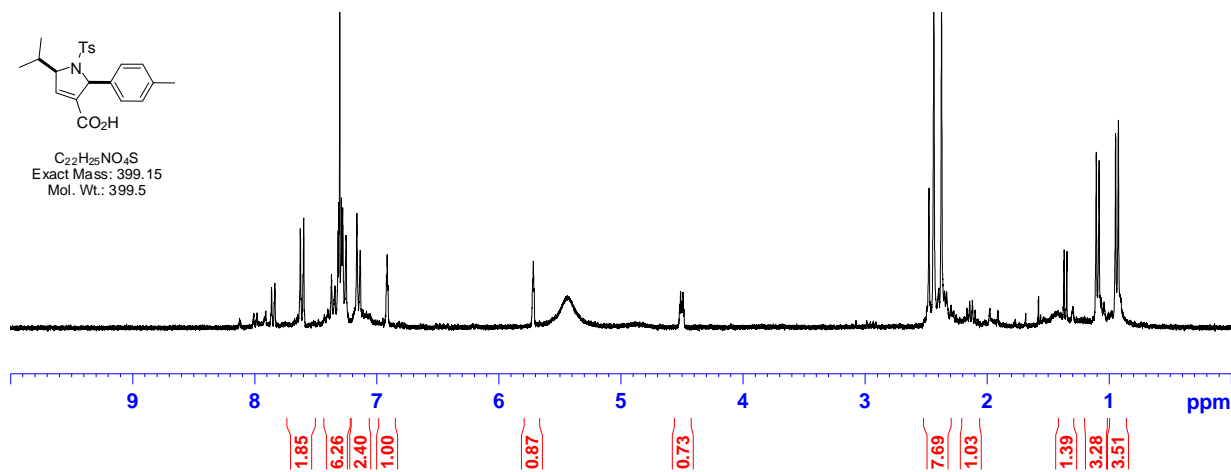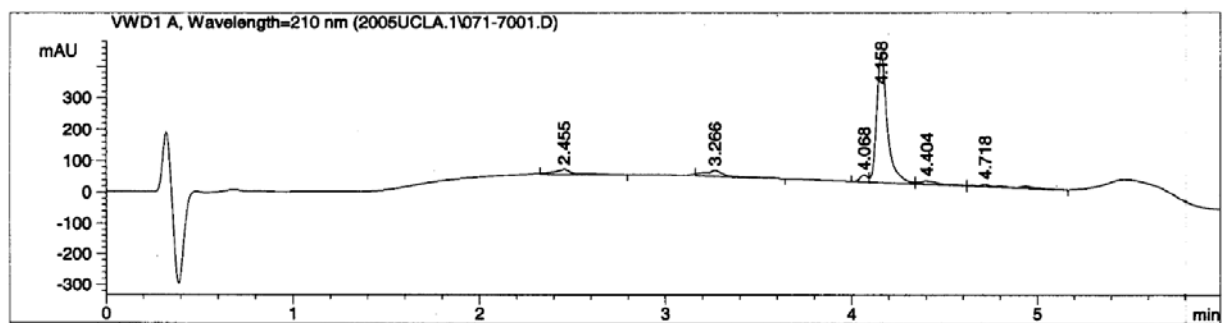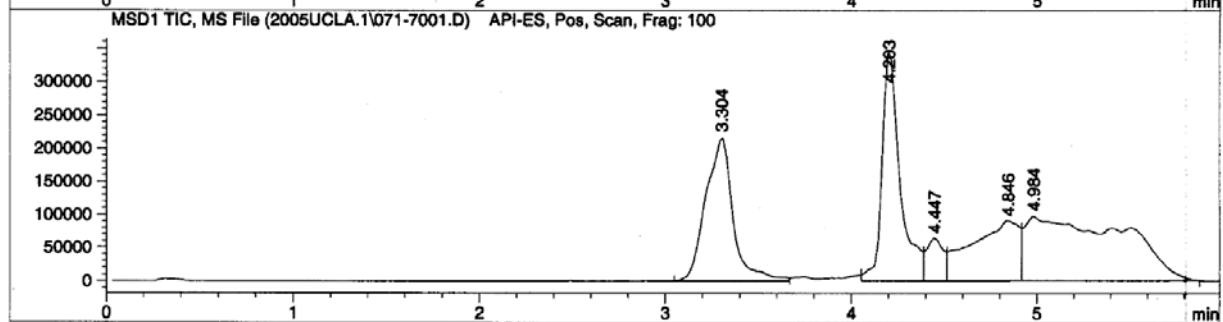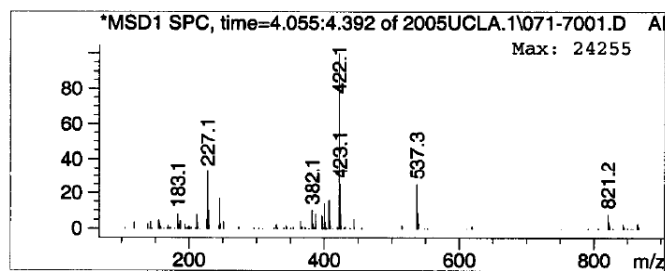

5-Propyl-2-(p-tolyl)-1-tosyl-2,5-dihydro-1H-pyrrole-3-carboxylic acid (A07C02)

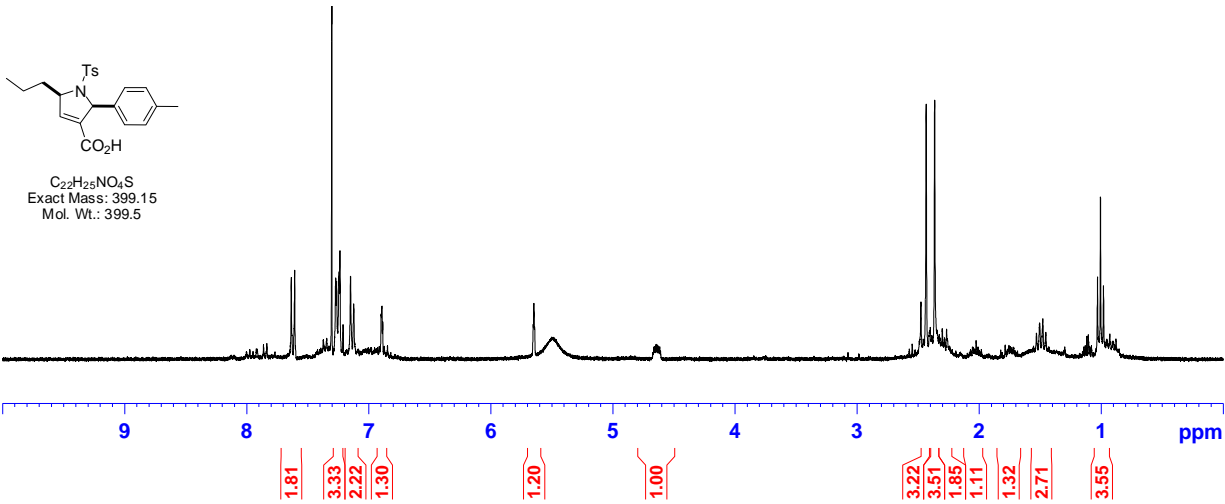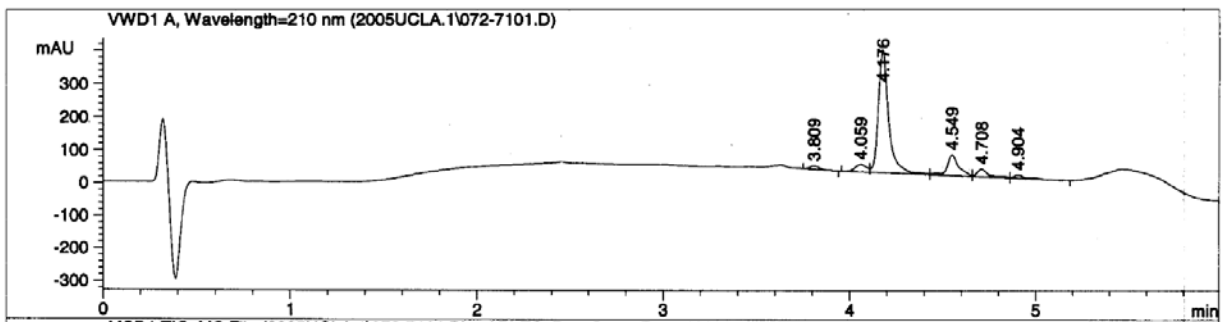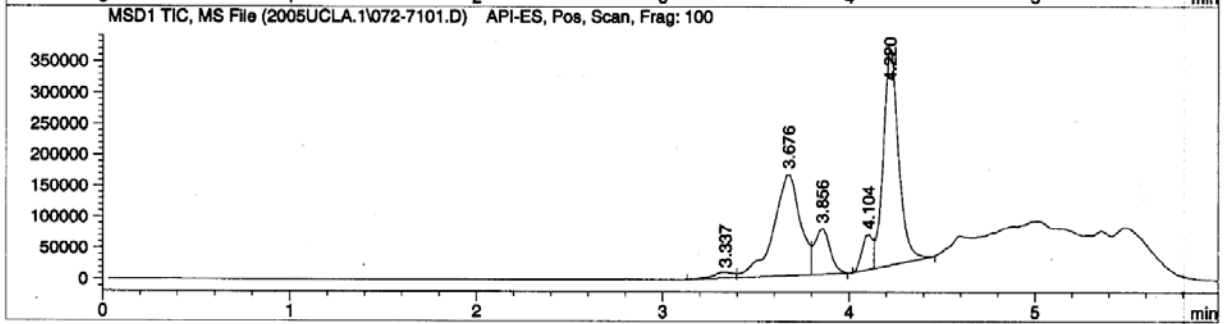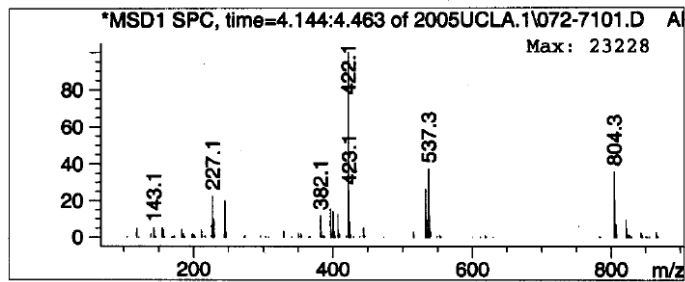

5-Butyl-2-(p-tolyl)-1-tosyl-2,5-dihydro-1H-pyrrole-3-carboxylic acid (A08C02)

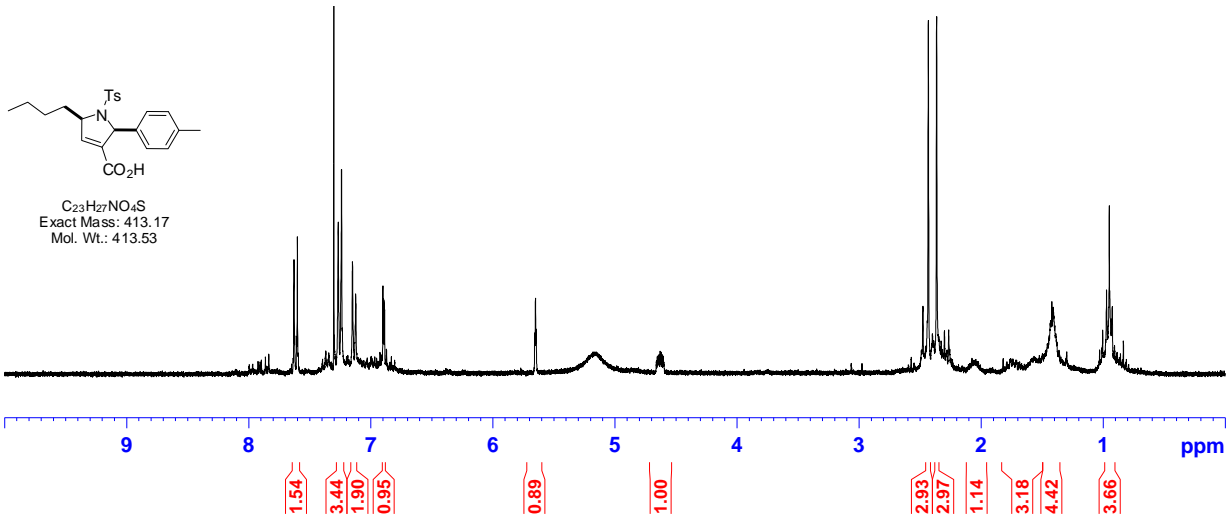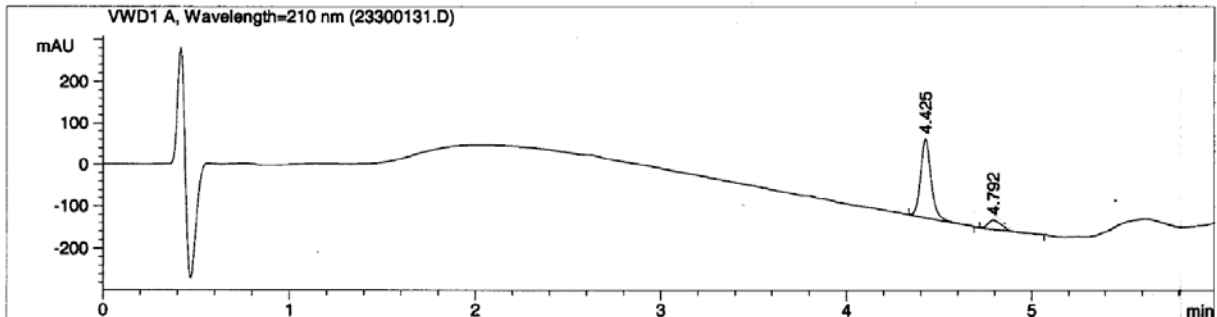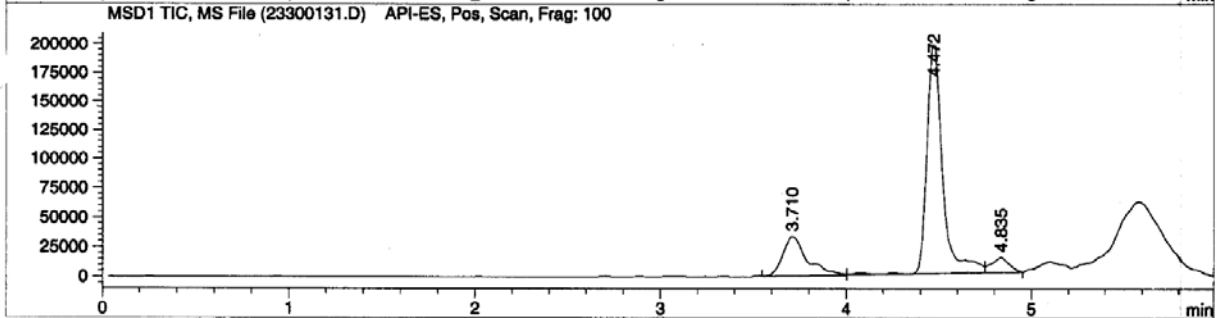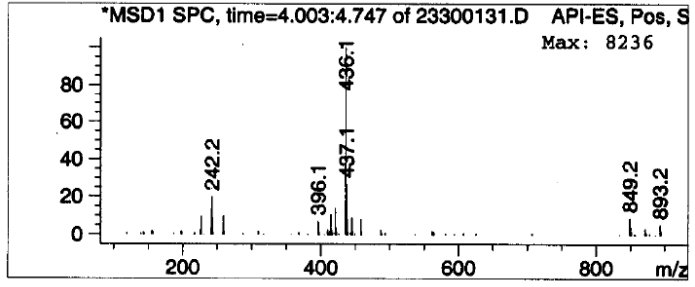

5-Pentyl-2-(*p*-tolyl)-1-tosyl-2,5-dihydro-1H-pyrrole-3-carboxylic acid (A09C02)

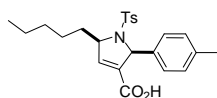

C<sub>24</sub>H<sub>29</sub>NO<sub>4</sub>S  
 Exact Mass: 427.18  
 Mol. Wt.: 427.56

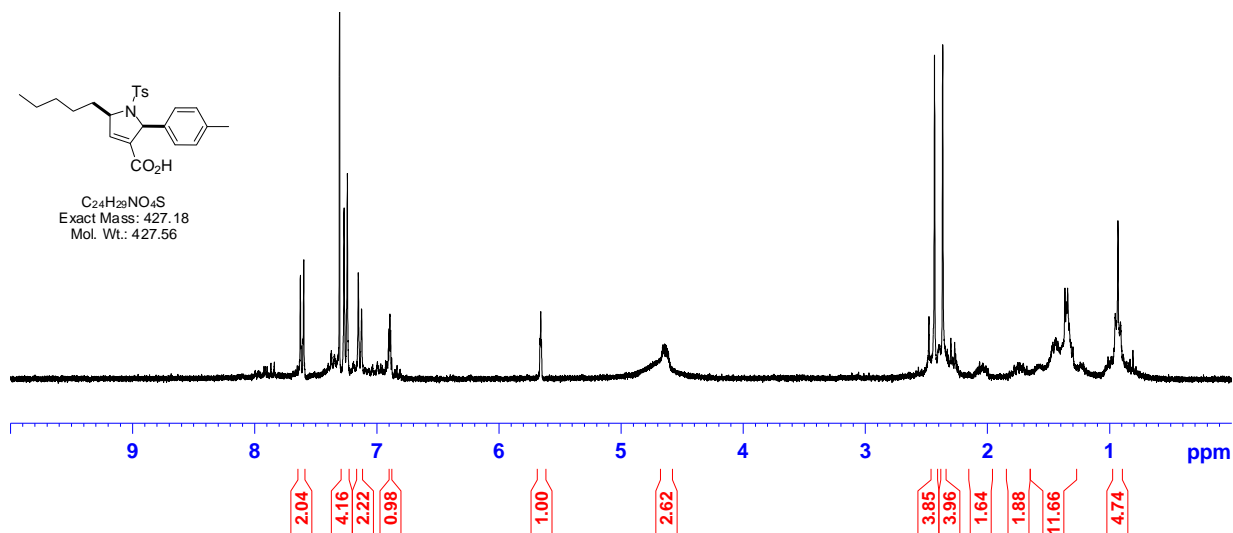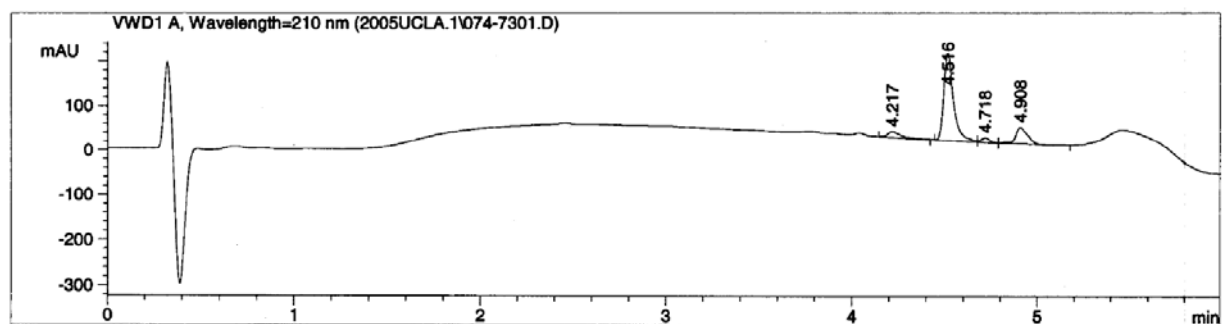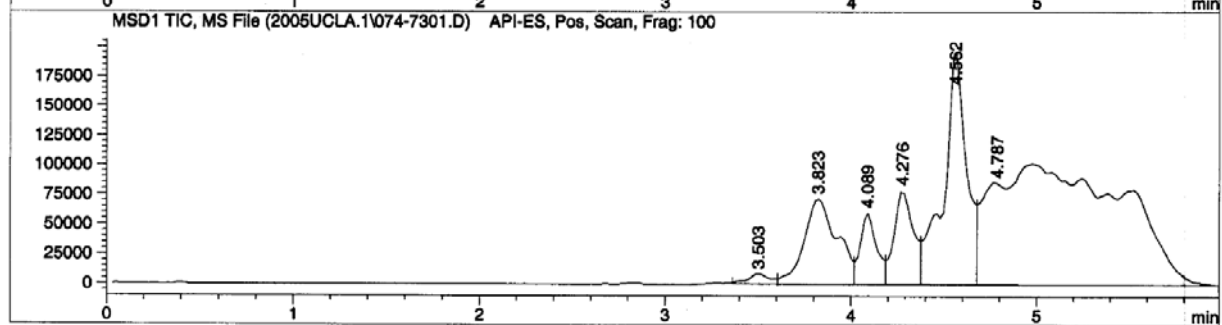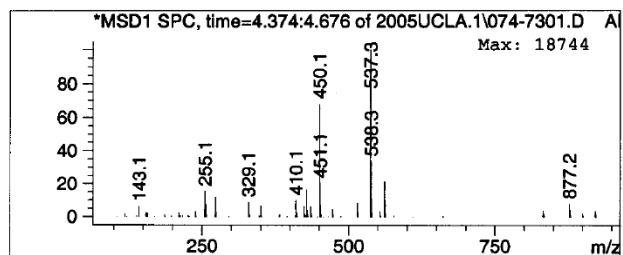

5-Hexyl-2-(*p*-tolyl)-1-tosyl-2,5-dihydro-1H-pyrrole-3-carboxylic acid (A10C02)

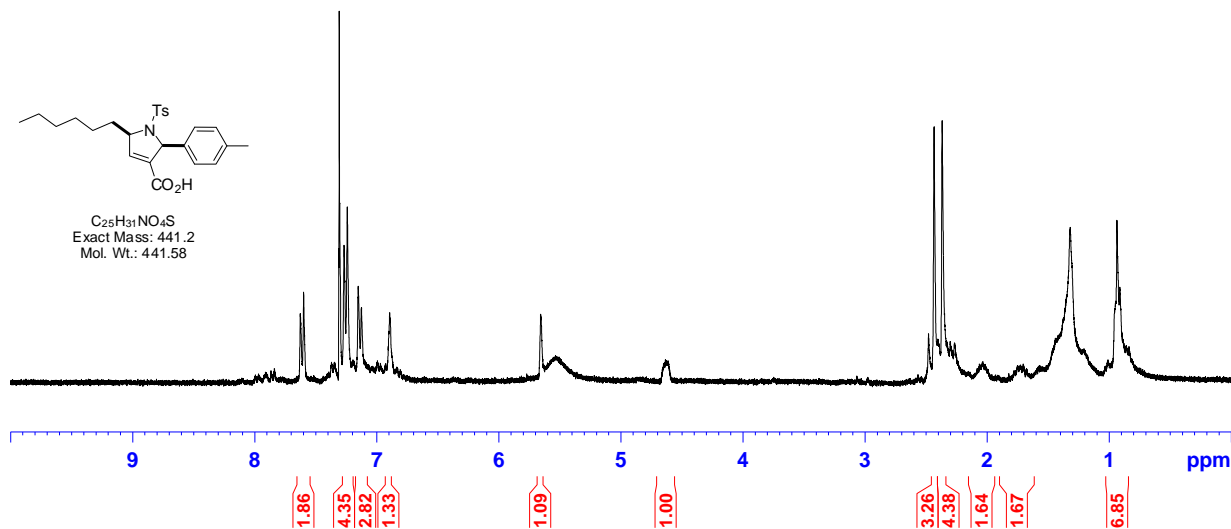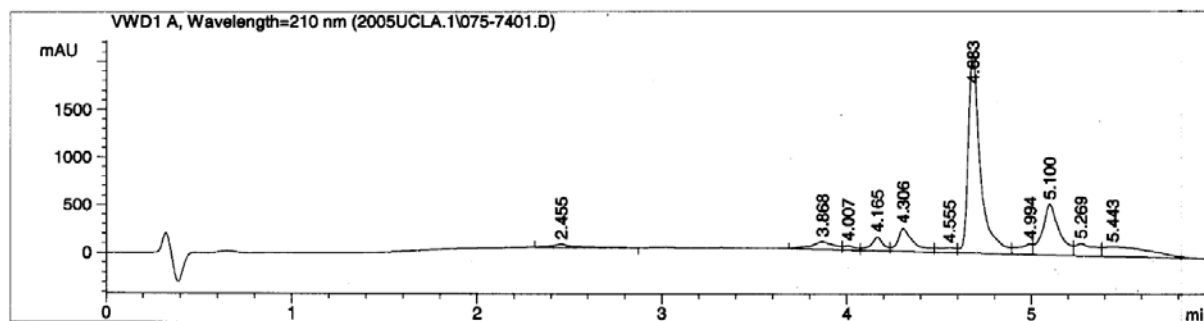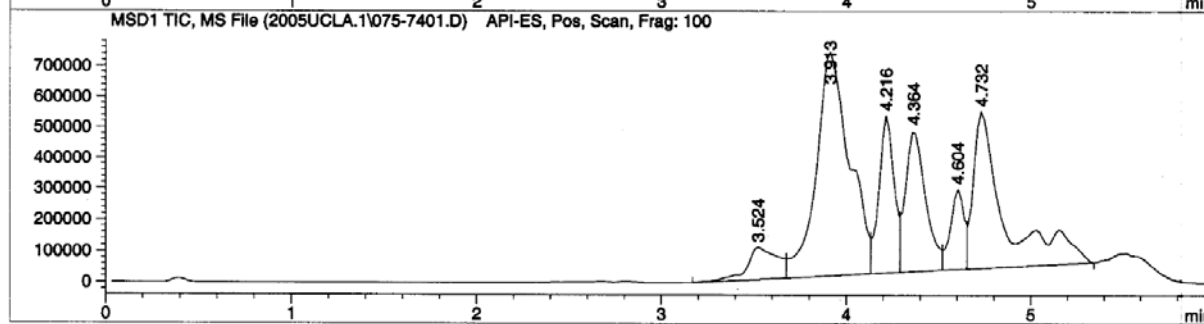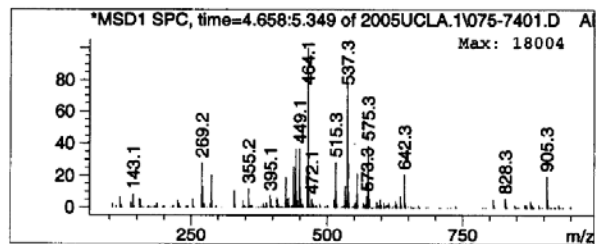

# 5-(Cyclopentylmethyl)-2-(*p*-tolyl)-1-tosyl-2,5-dihydro-1H-pyrrole-3-carboxylic acid (A11C02)

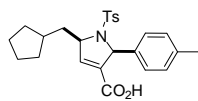

C<sub>25</sub>H<sub>29</sub>NO<sub>4</sub>S  
Exact Mass: 439.18  
Mol. Wt.: 439.57

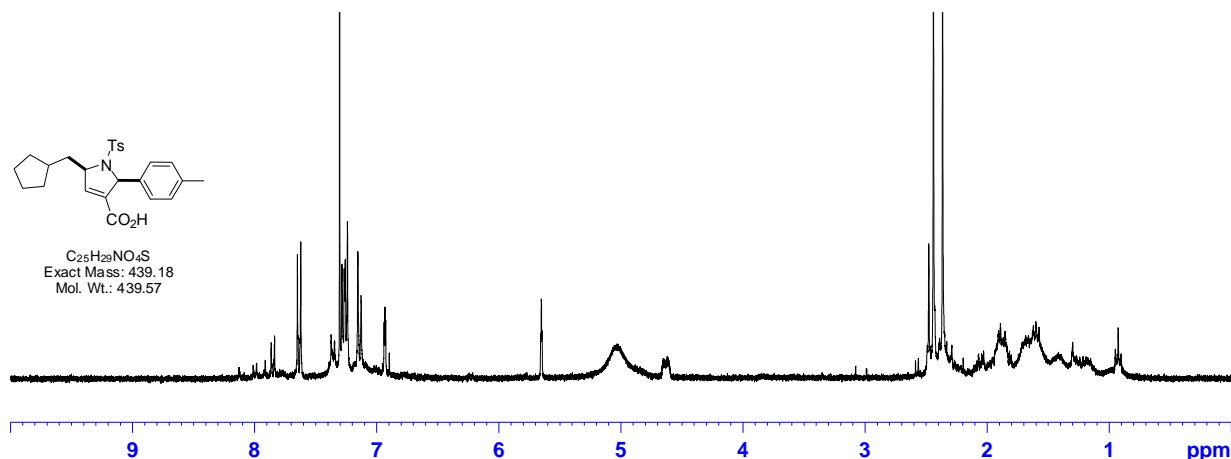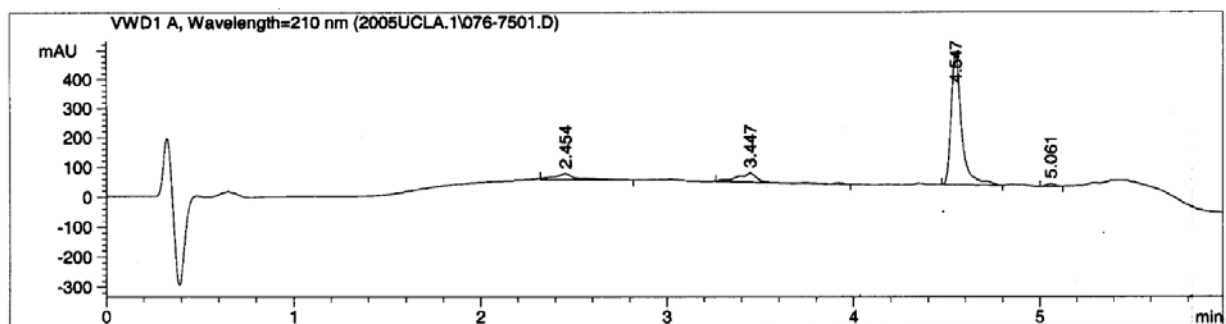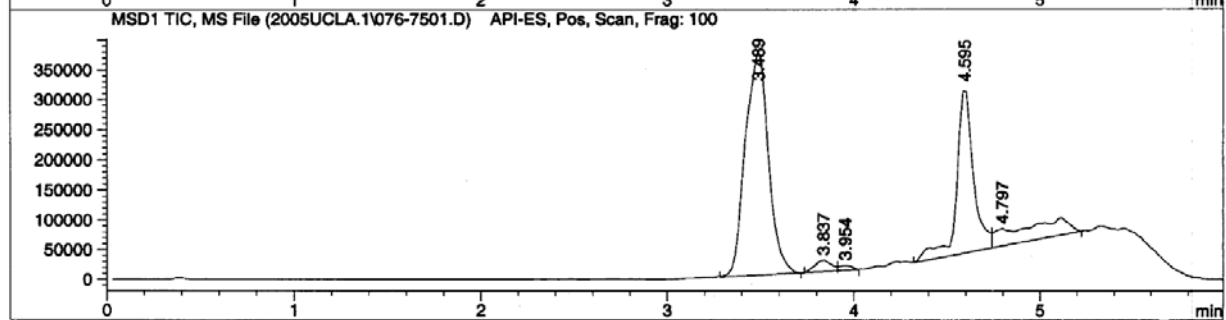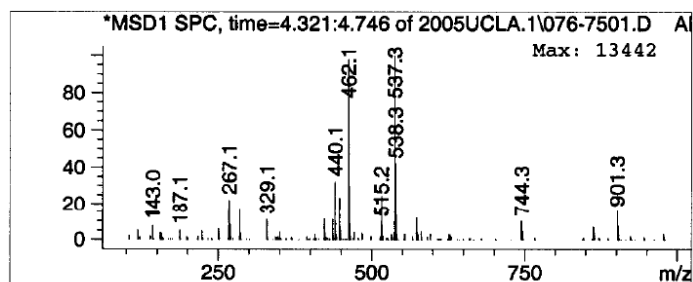

# Spectral Data for Table 5

## 5-Ethyl-2-phenyl-1-tosyl-2,5-dihydro-1H-pyrrole-3-carboxylic acid (A05C01)

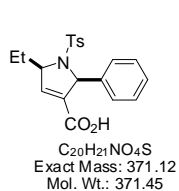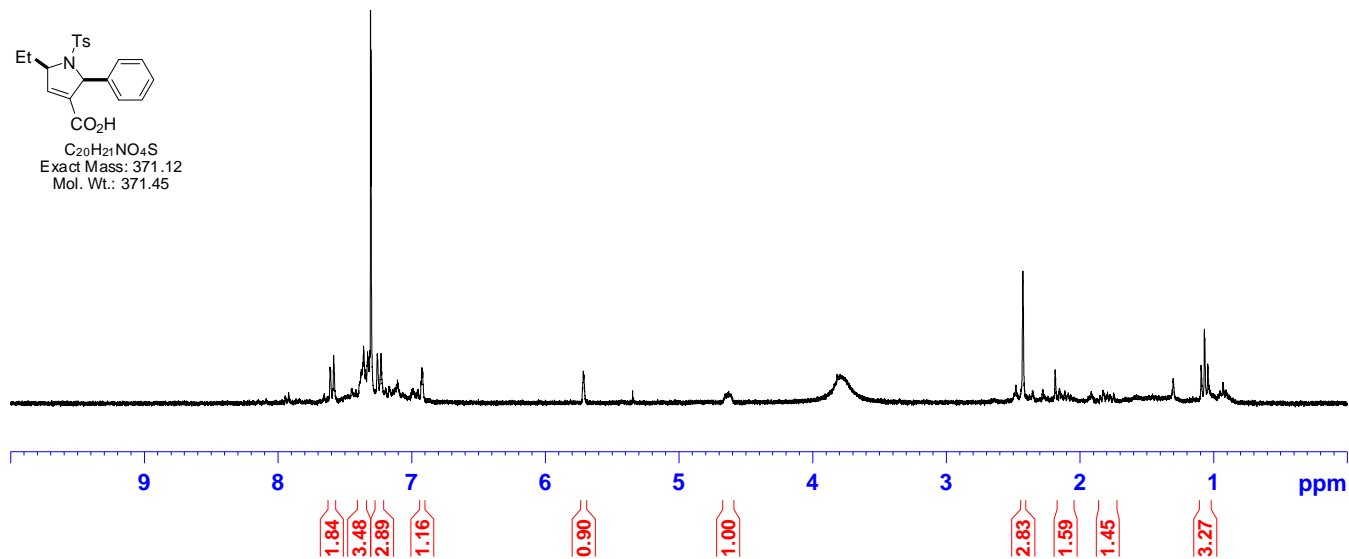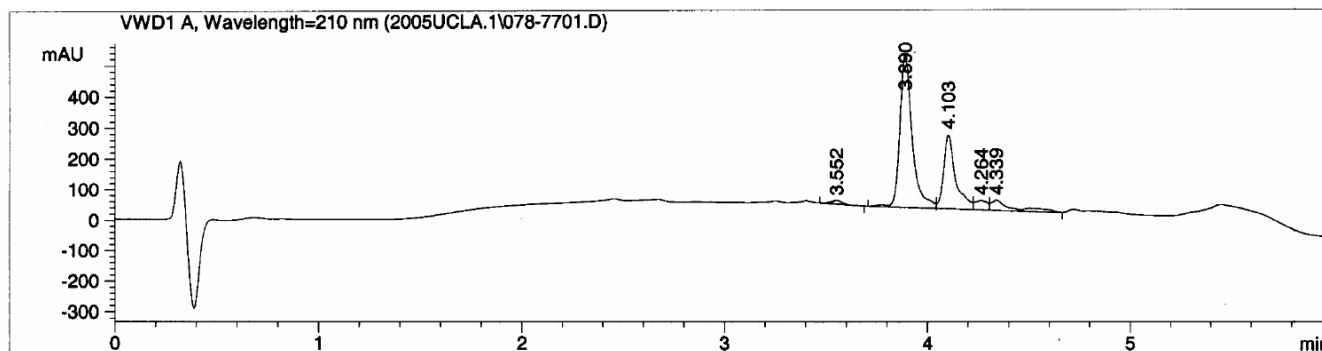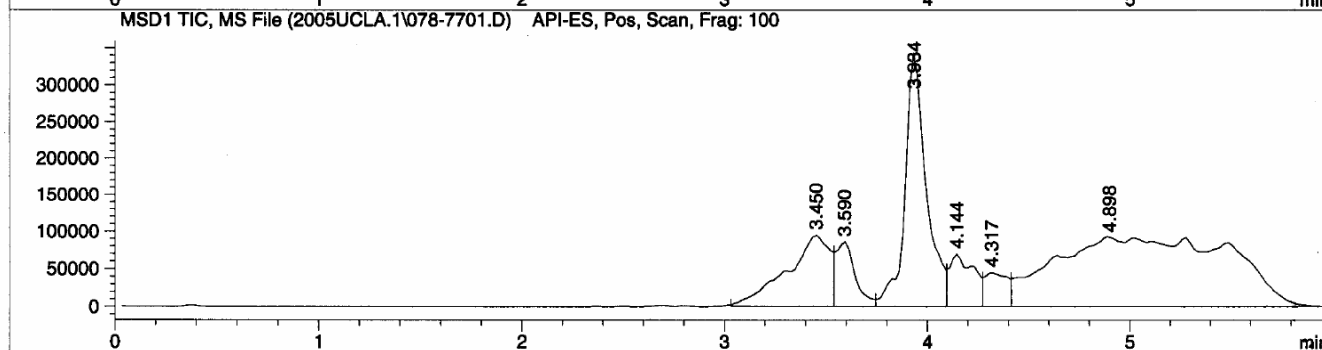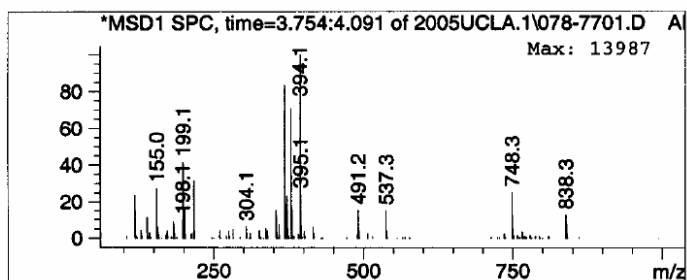



5-Ethyl-2-(p-tolyl)-1-tosyl-2,5-dihydro-1H-pyrrole-3-carboxylic acid (A05C02)

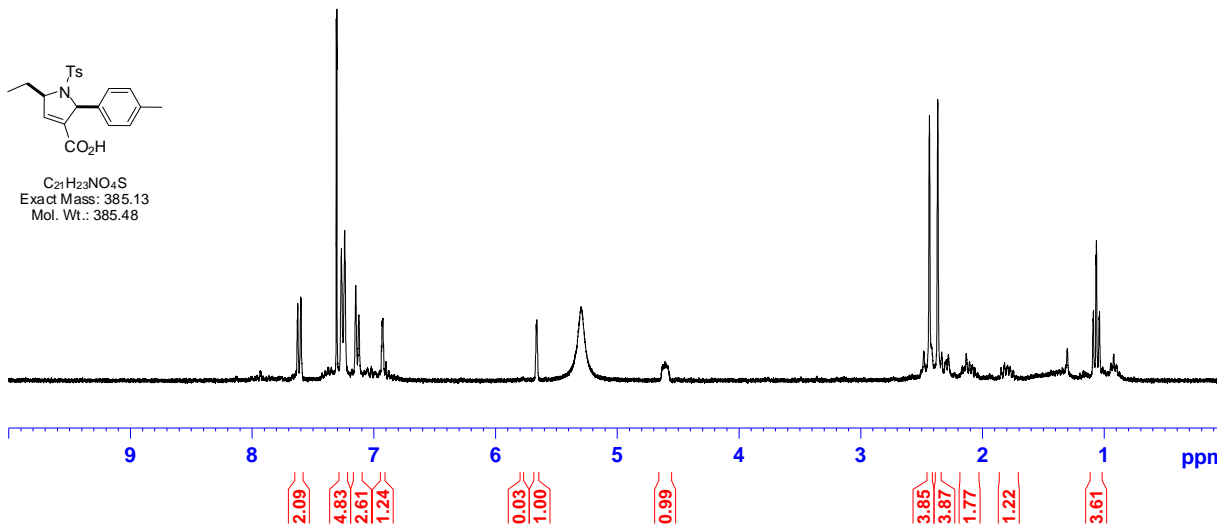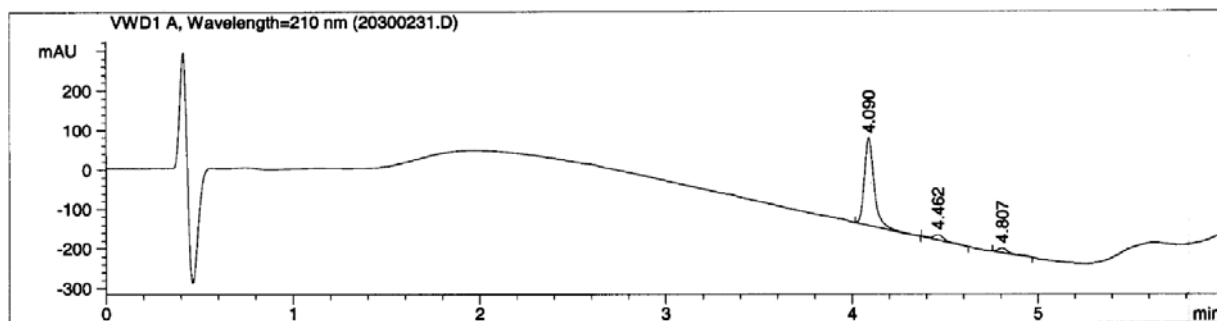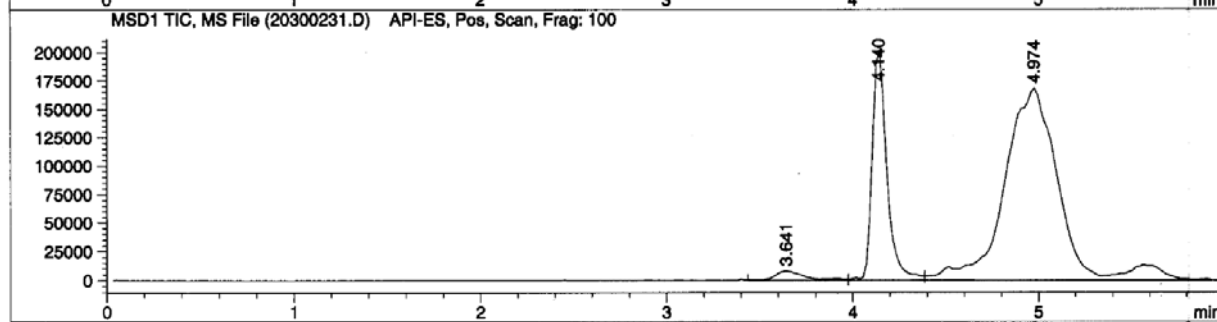

5-Ethyl-2-(4-ethylphenyl)-1-tosyl-2,5-dihydro-1H-pyrrole-3-carboxylic acid (A05C03)

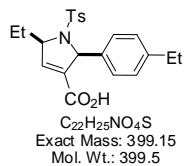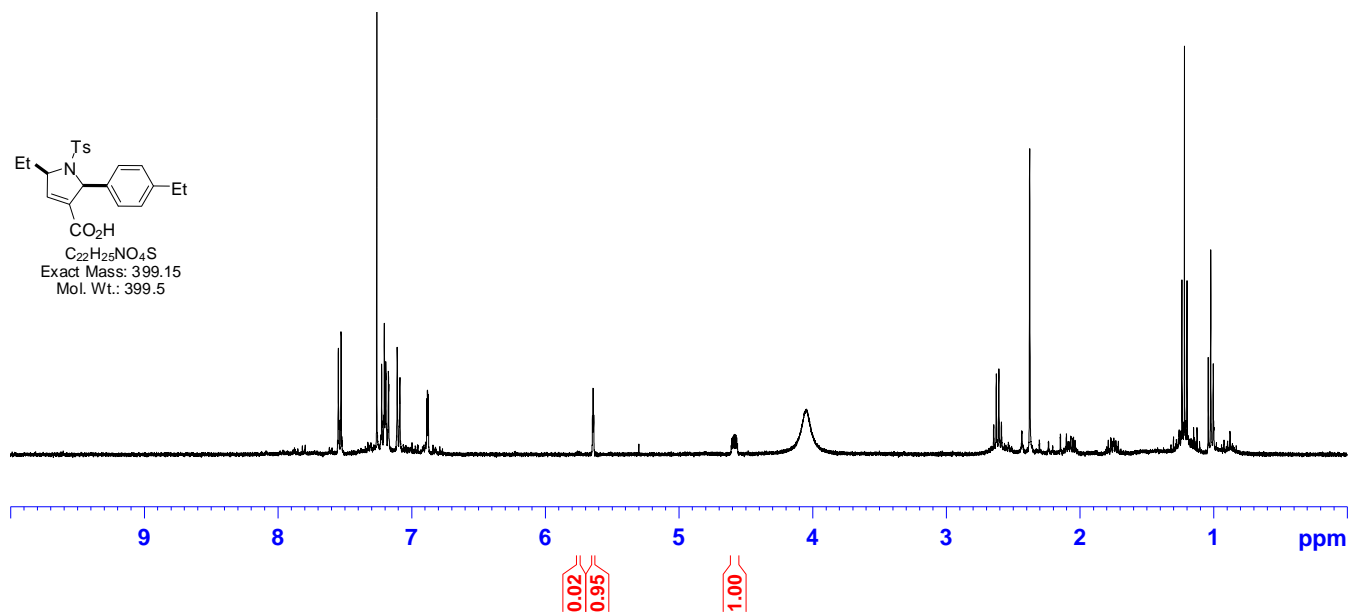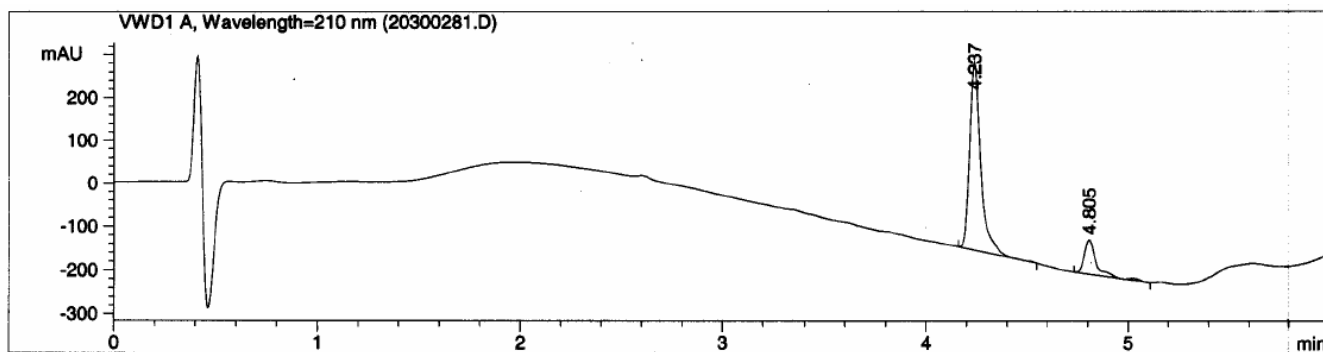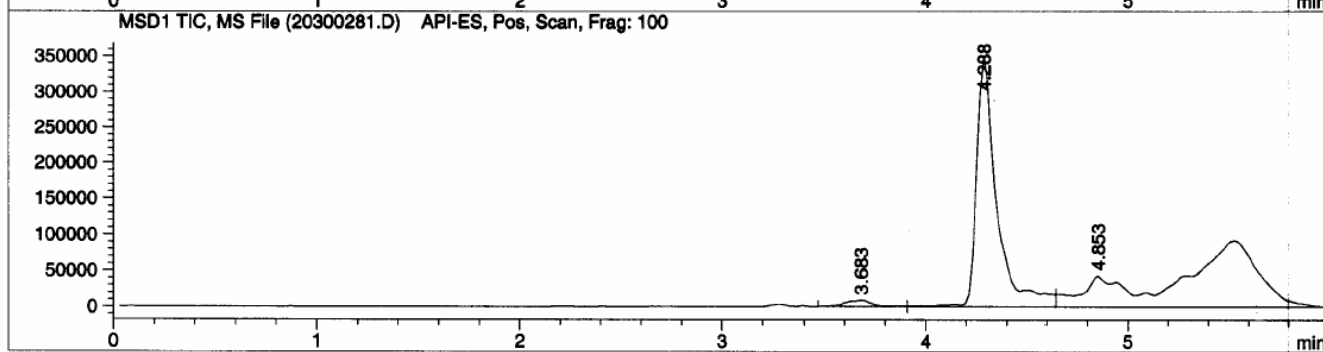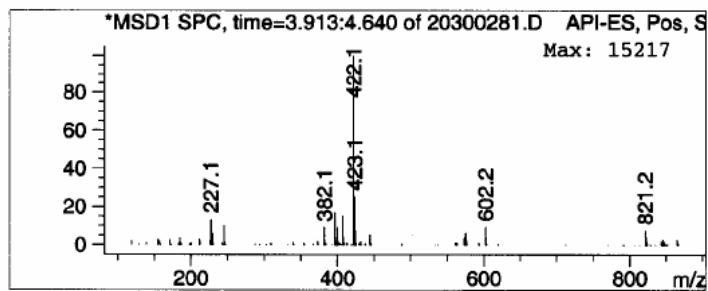

2-(Benzo[d][1,3]dioxol-5-yl)-5-ethyl-1-tosyl-2,5-dihydro-1H-pyrrole-3-carboxylic acid (A05C06)

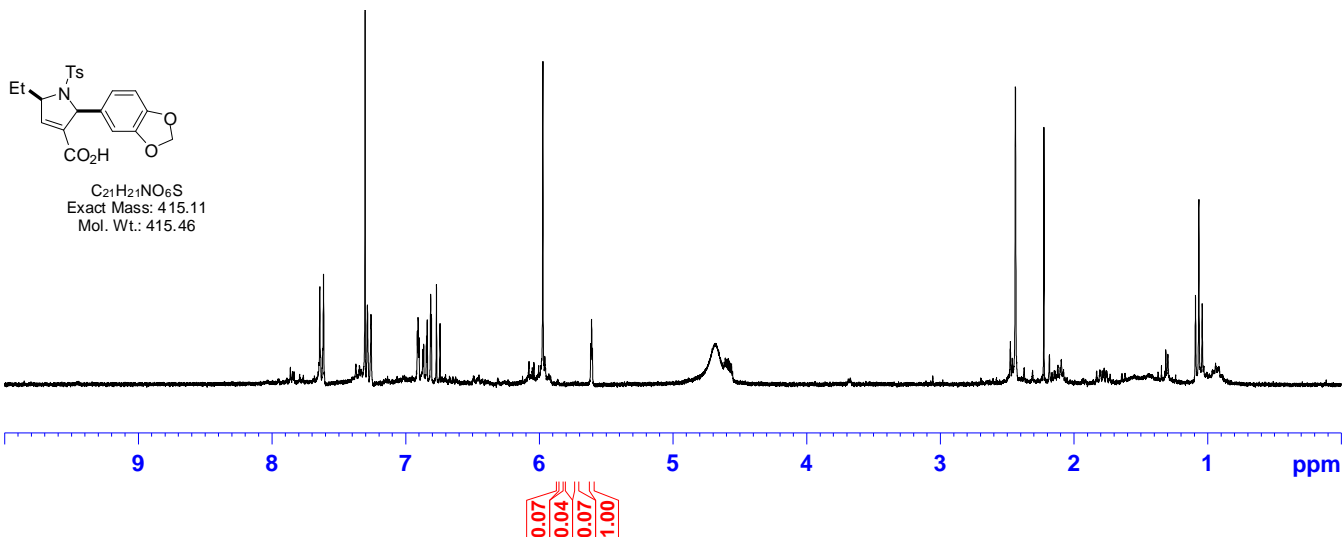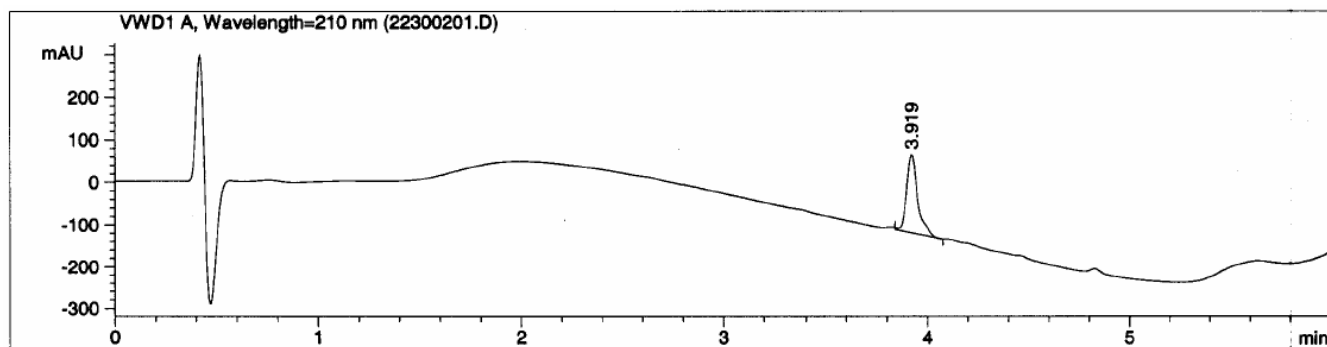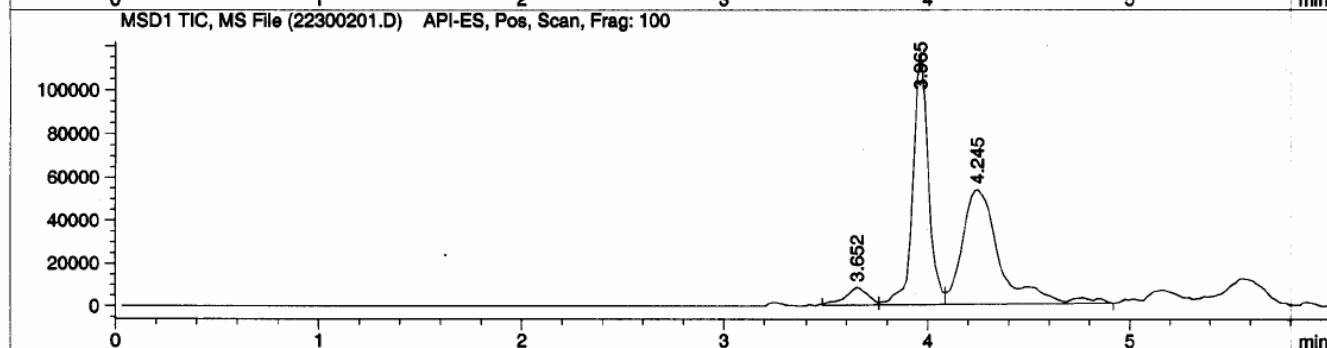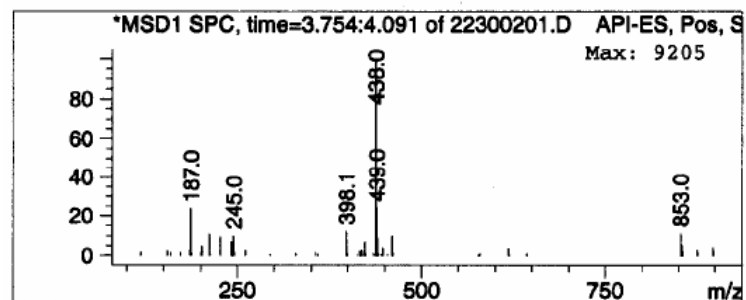

2-(4-Cyanophenyl)-5-ethyl-1-tosyl-2,5-dihydro-1H-pyrrole-3-carboxylic acid (A05C09)

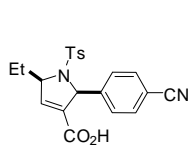

C<sub>21</sub>H<sub>20</sub>N<sub>2</sub>O<sub>4</sub>S  
 Exact Mass: 396.11  
 Mol. Wt.: 396.46

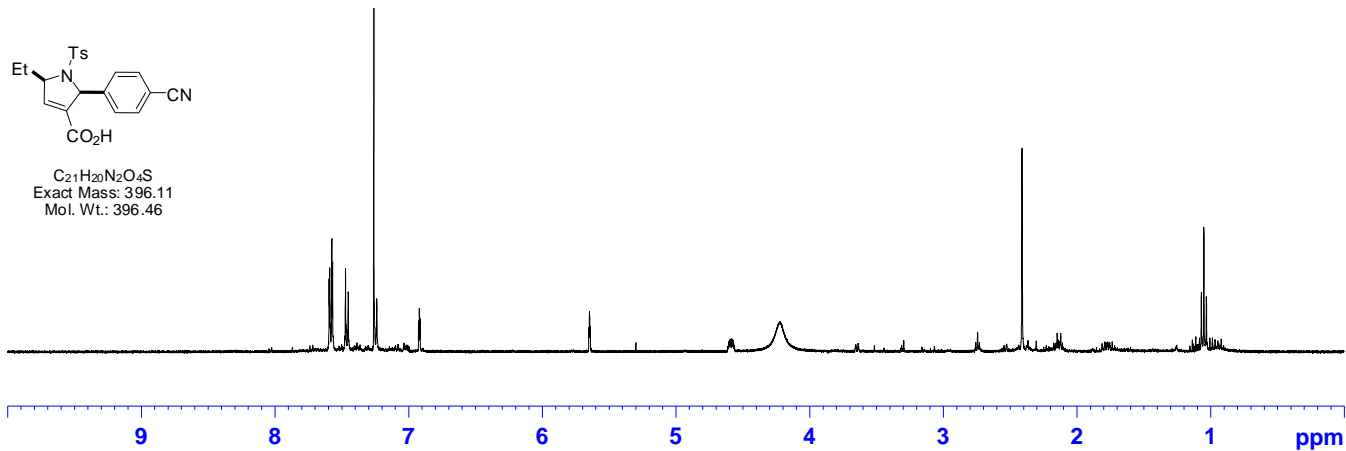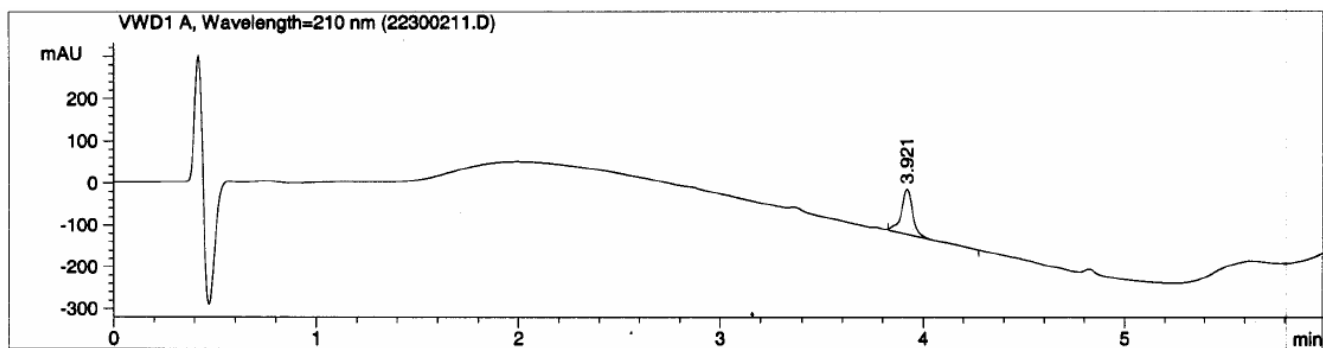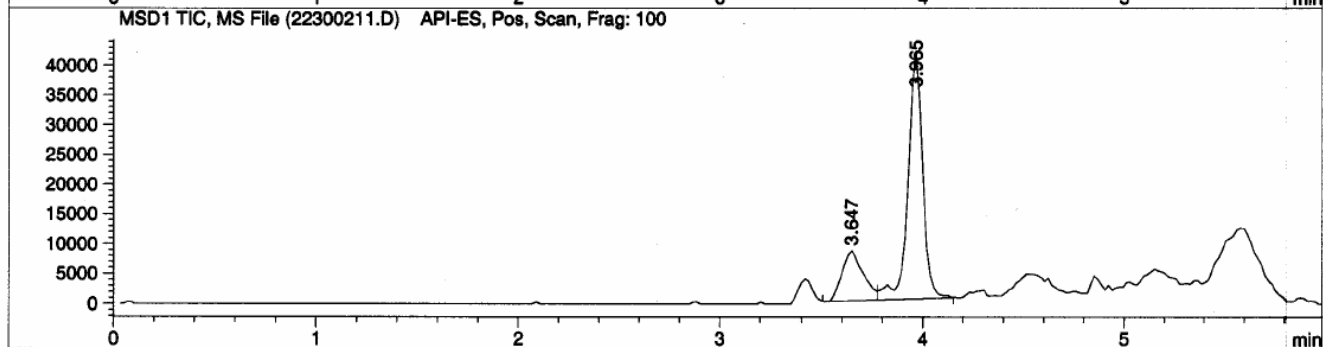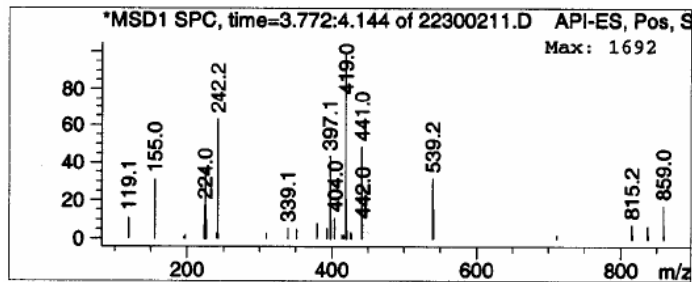

# 5-Ethyl-2-(2-fluorophenyl)-1-tosyl-2,5-dihydro-1H-pyrrole-3-carboxylic acid (A05C10)

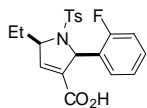

C<sub>20</sub>H<sub>20</sub>FNO<sub>4</sub>S  
Exact Mass: 389.11  
Mol. Wt.: 389.44

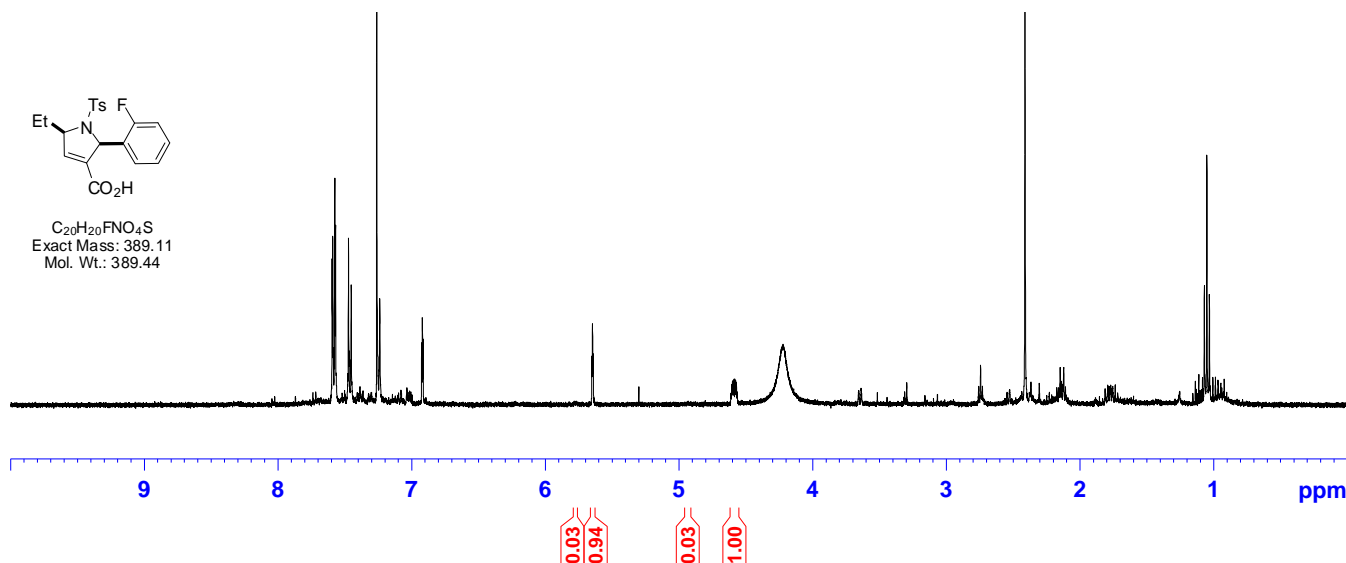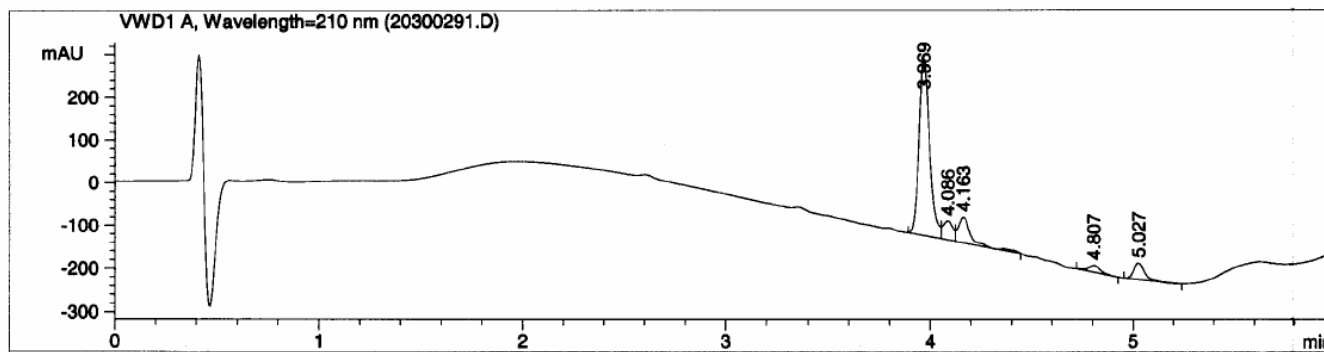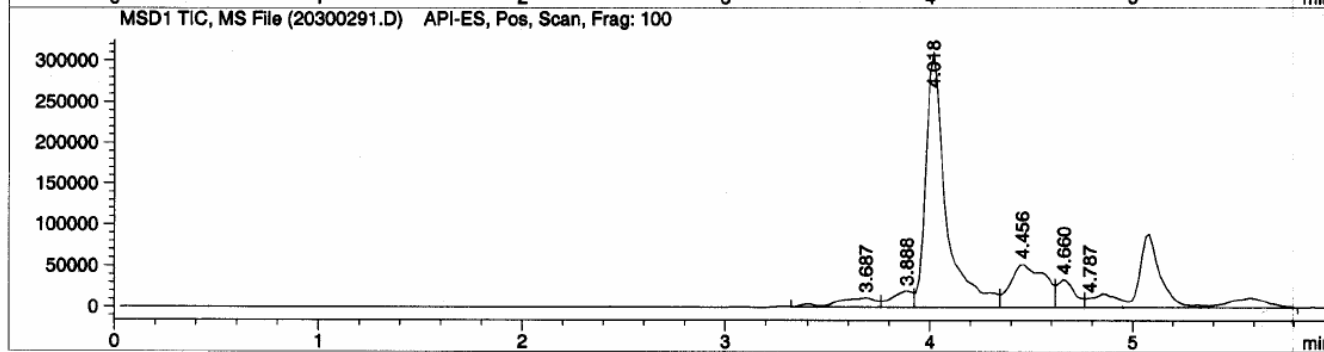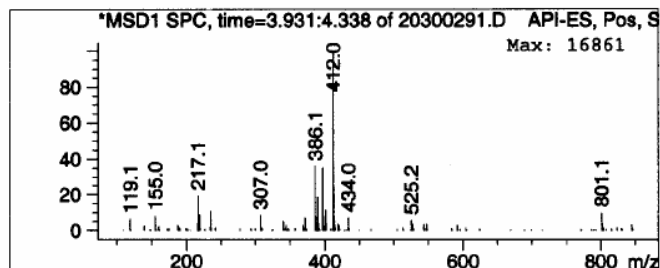

2-(4-Chlorophenyl)-5-ethyl-1-tosyl-2,5-dihydro-1H-pyrrole-3-carboxylic acid (A05C11)

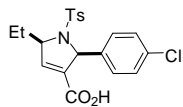

C<sub>20</sub>H<sub>20</sub>ClNO<sub>2</sub>S  
 Exact Mass: 405.08  
 Mol. Wt.: 405.9

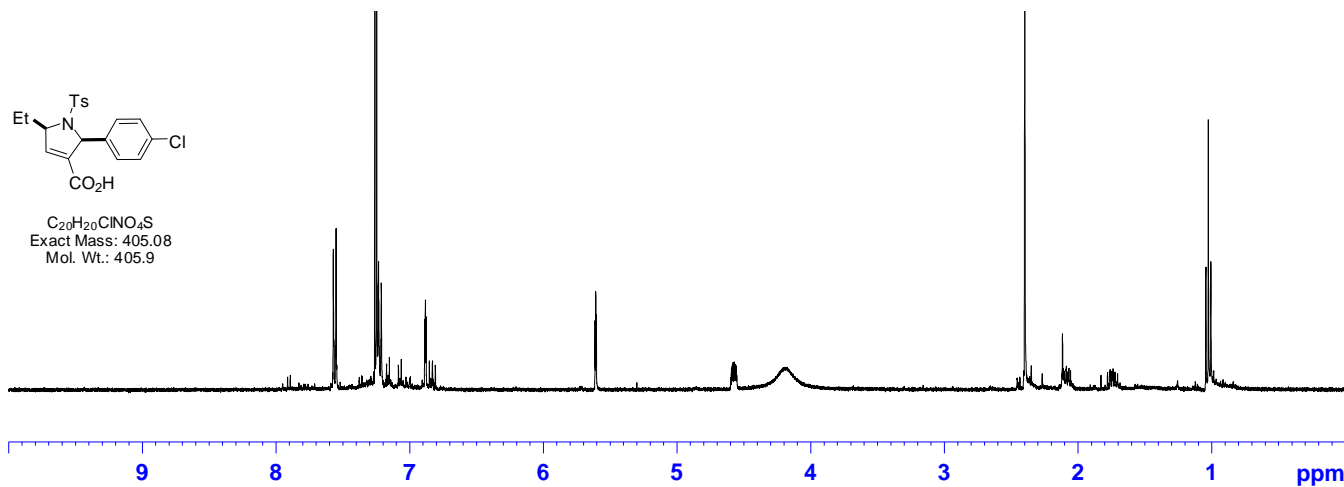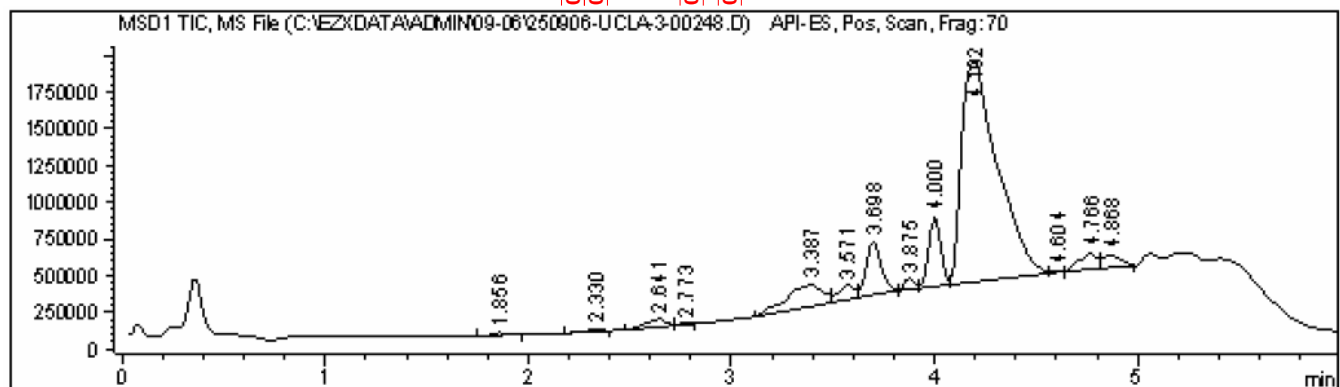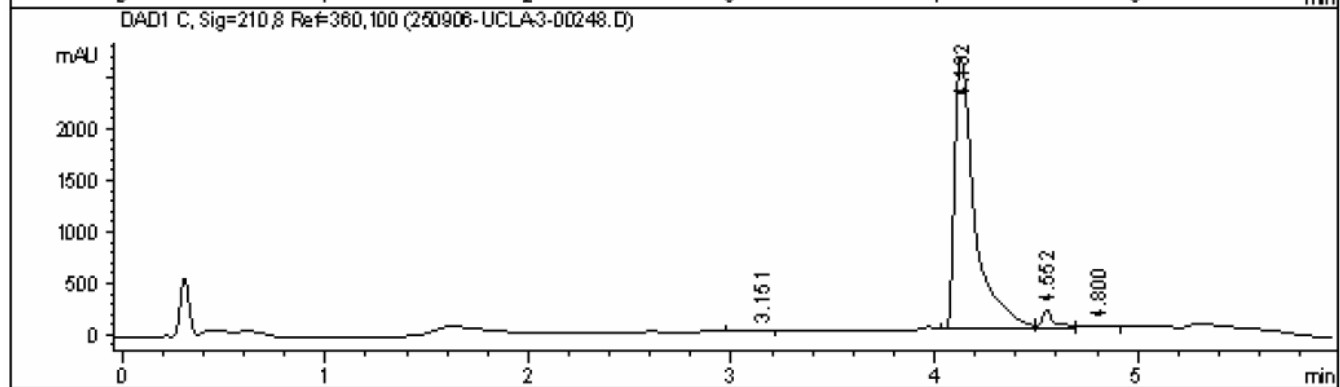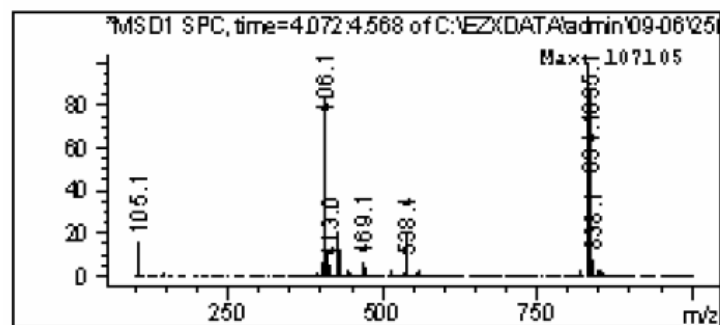

# 2-(3-Chlorophenyl)-5-ethyl-1-tosyl-2,5-dihydro-1H-pyrrole-3-carboxylic acid (A05C12)

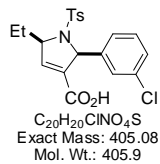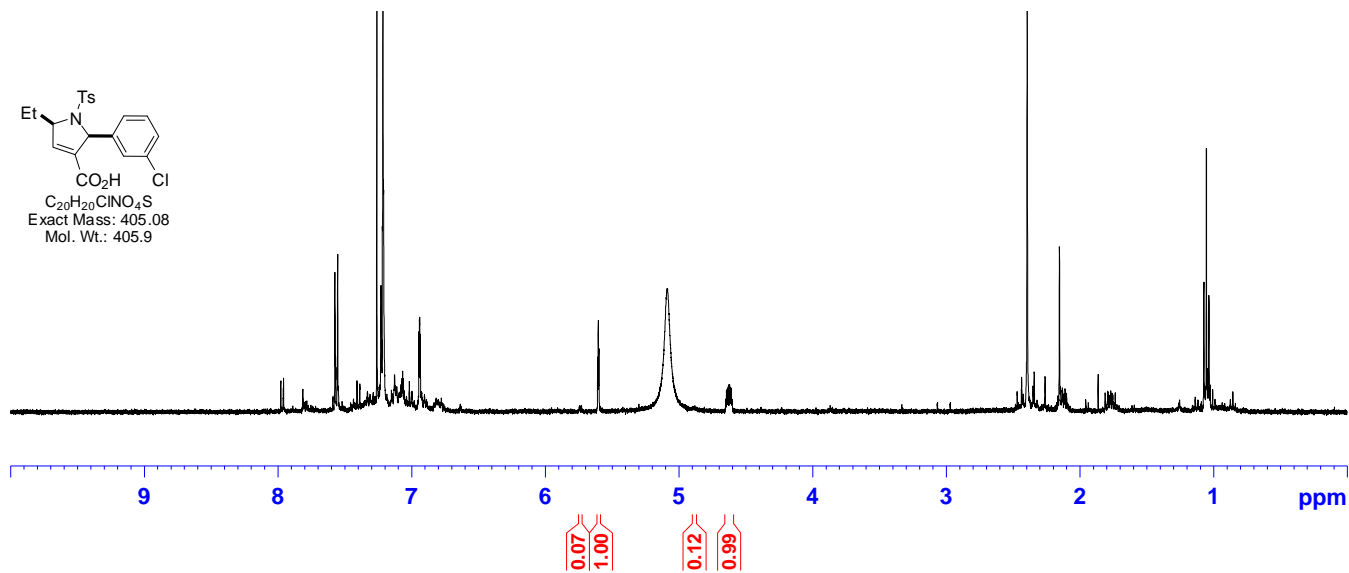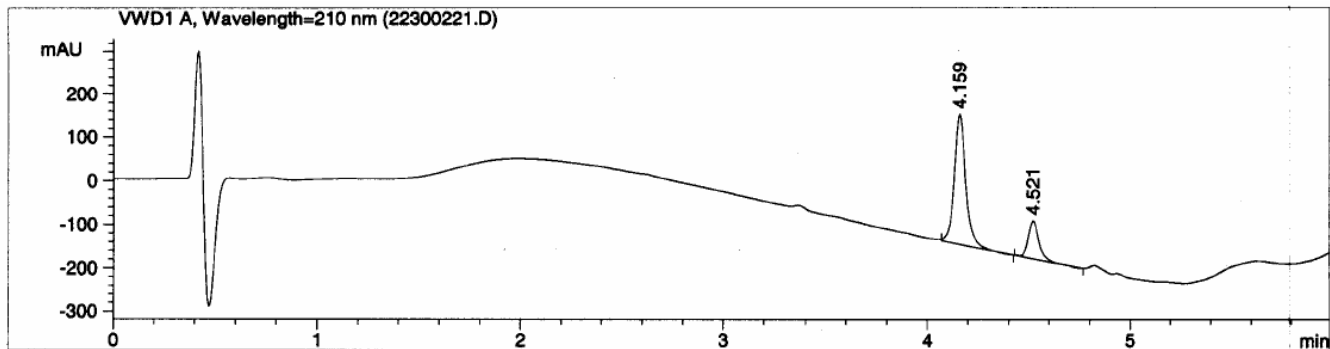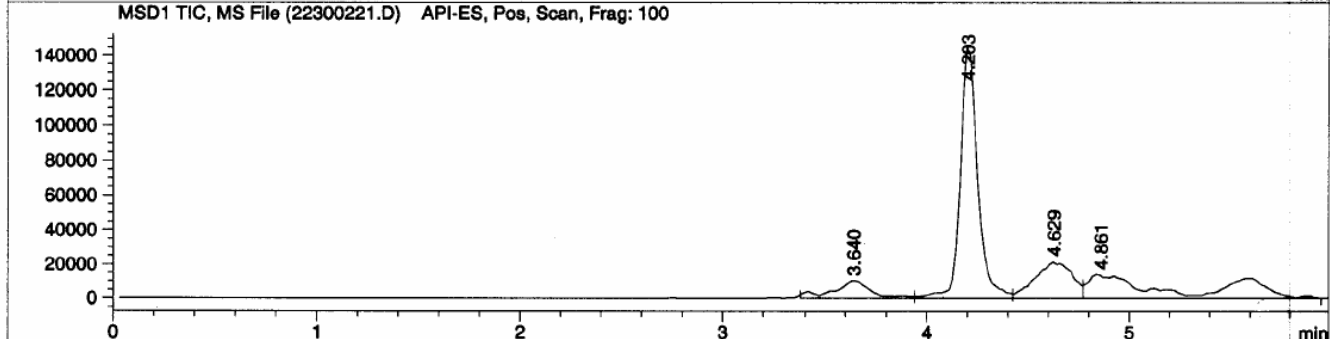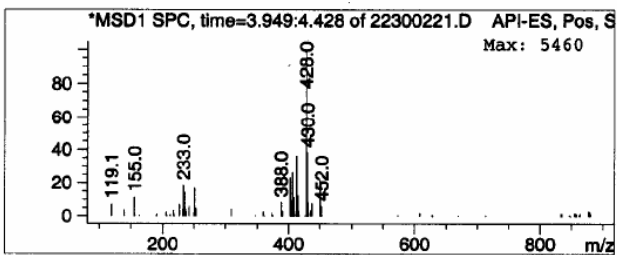

2-(3,4-Dichlorophenyl)-5-ethyl-1-tosyl-2,5-dihydro-1H-pyrrole-3-carboxylic acid (A05C13)

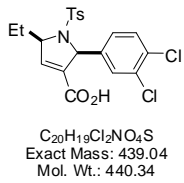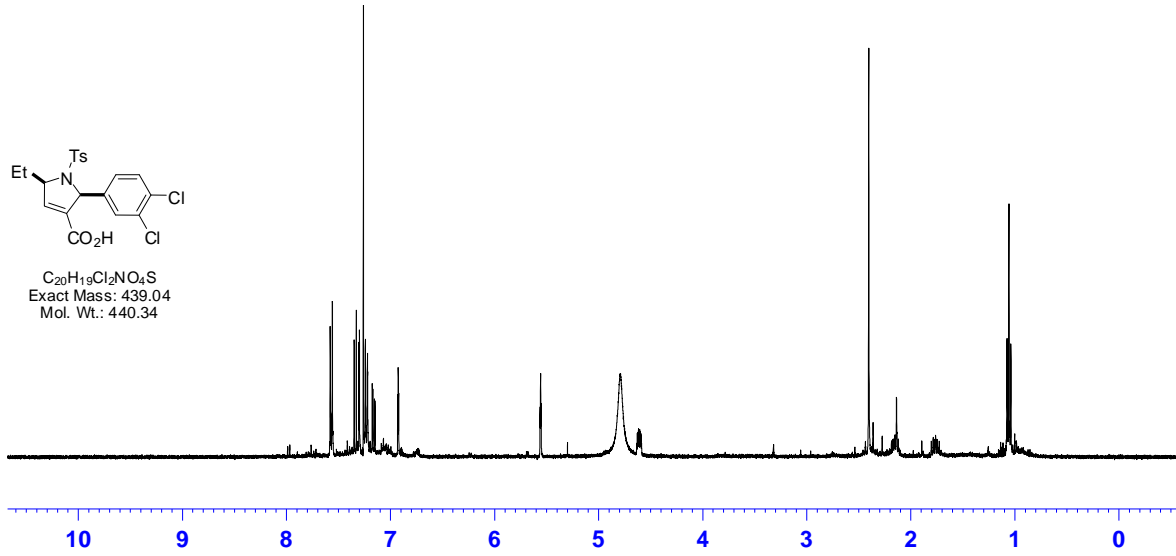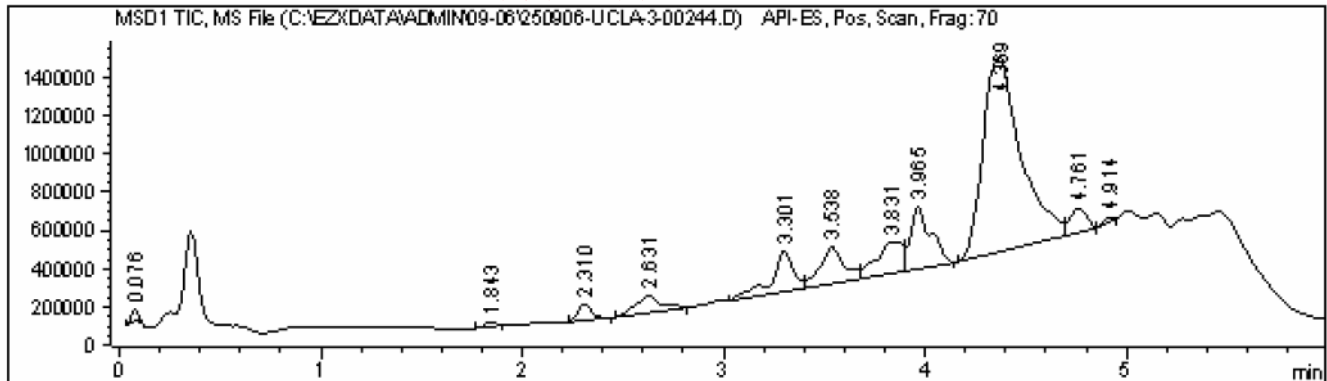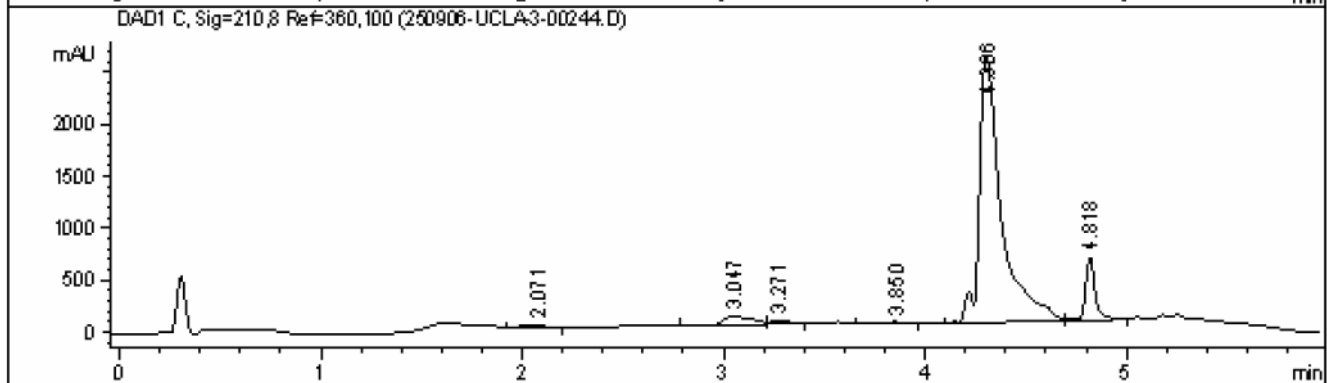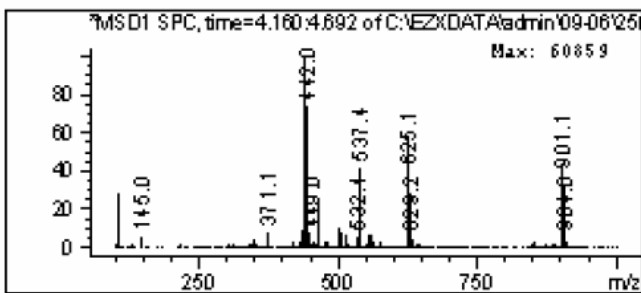

Component 2: Peak at Scan 244.2. Top ions are 440 442 441



# 2-(4-Bromophenyl)-5-ethyl-1-tosyl-2,5-dihydro-1H-pyrrole-3-carboxylic acid (A05C14)

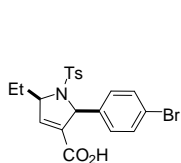

C<sub>20</sub>H<sub>20</sub>BrNO<sub>4</sub>S  
Exact Mass: 449.03  
Mol. Wt.: 450.35

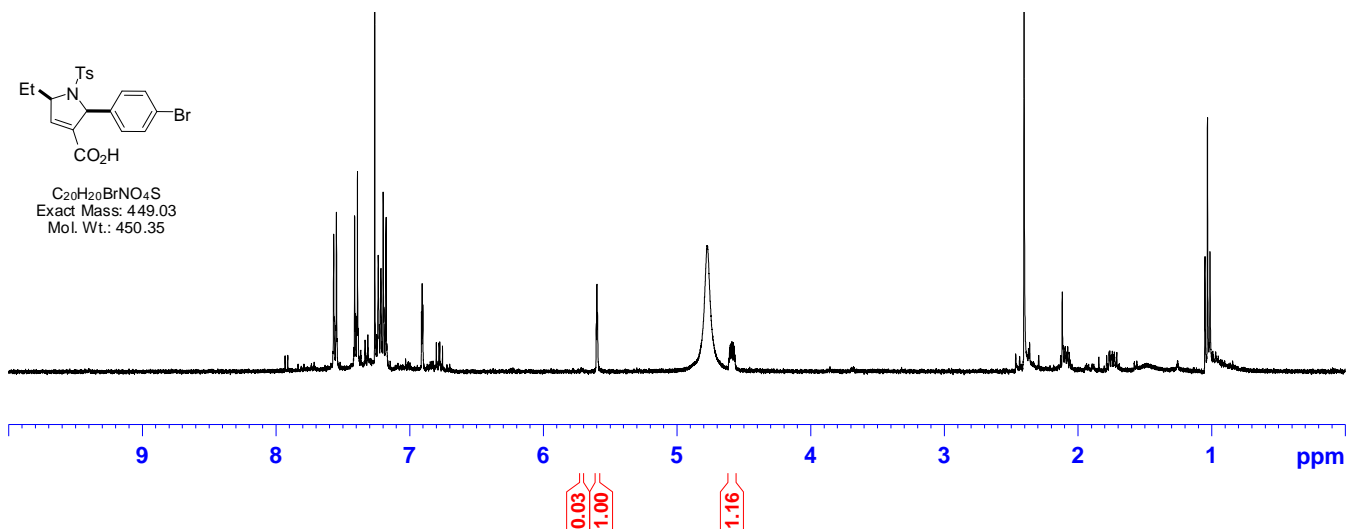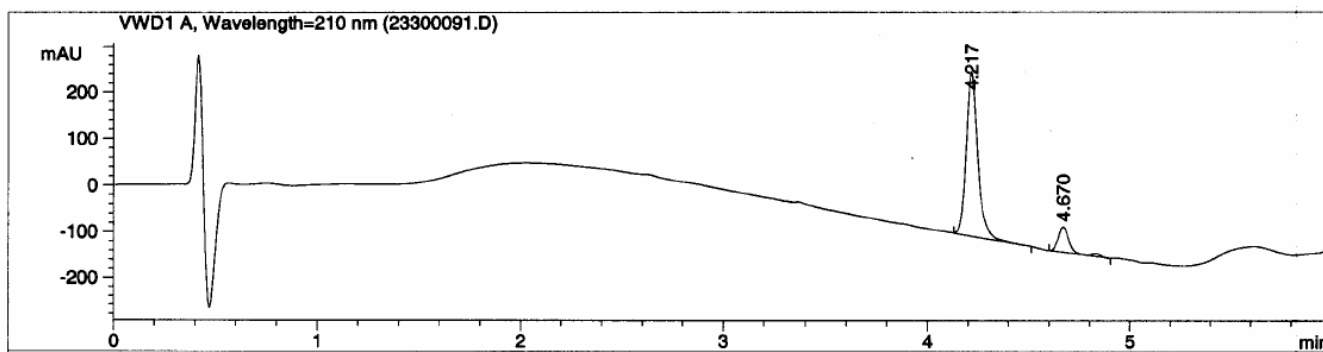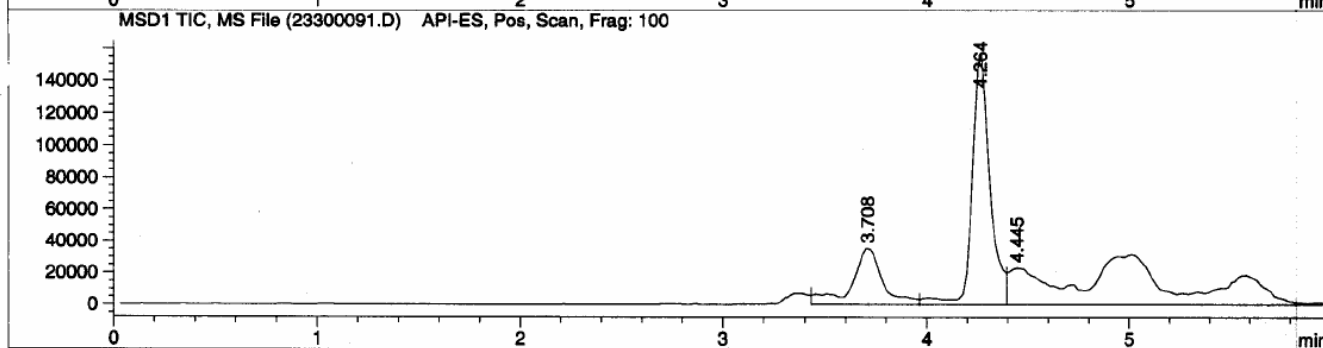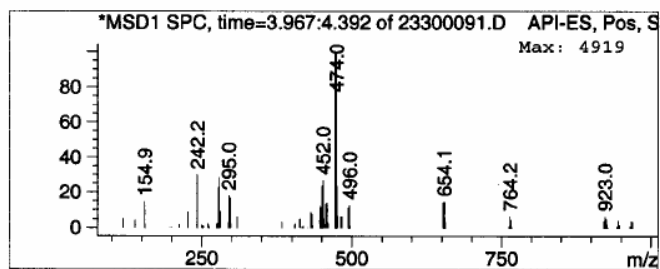

2-(3-Bromophenyl)-5-ethyl-1-tosyl-2,5-dihydro-1H-pyrrole-3-carboxylic acid (A05C15)

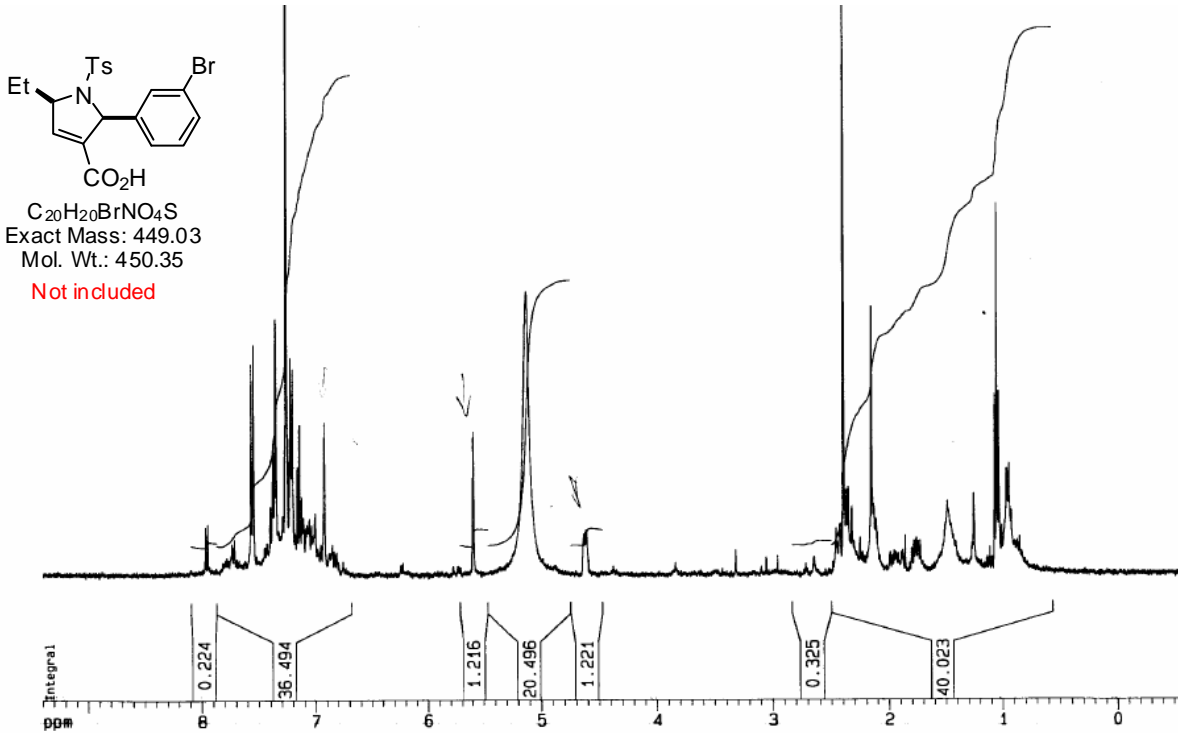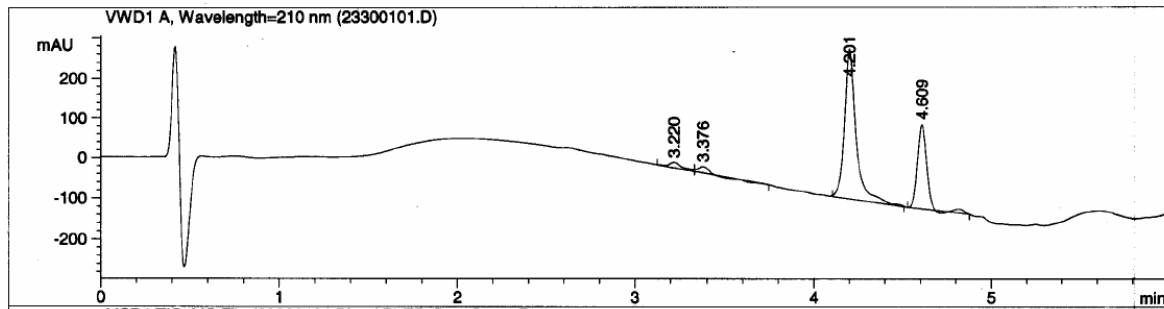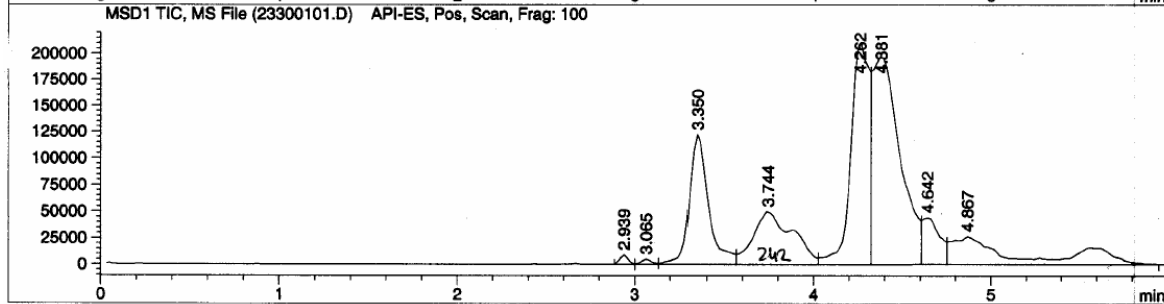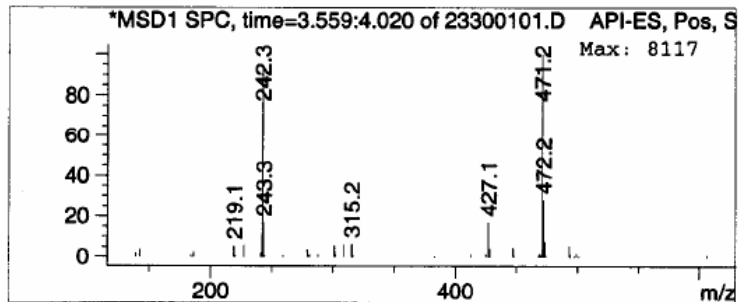

5-Ethyl-2-(naphthalen-1-yl)-1-tosyl-2,5-dihydro-1H-pyrrole-3-carboxylic acid (A05C16)

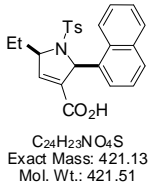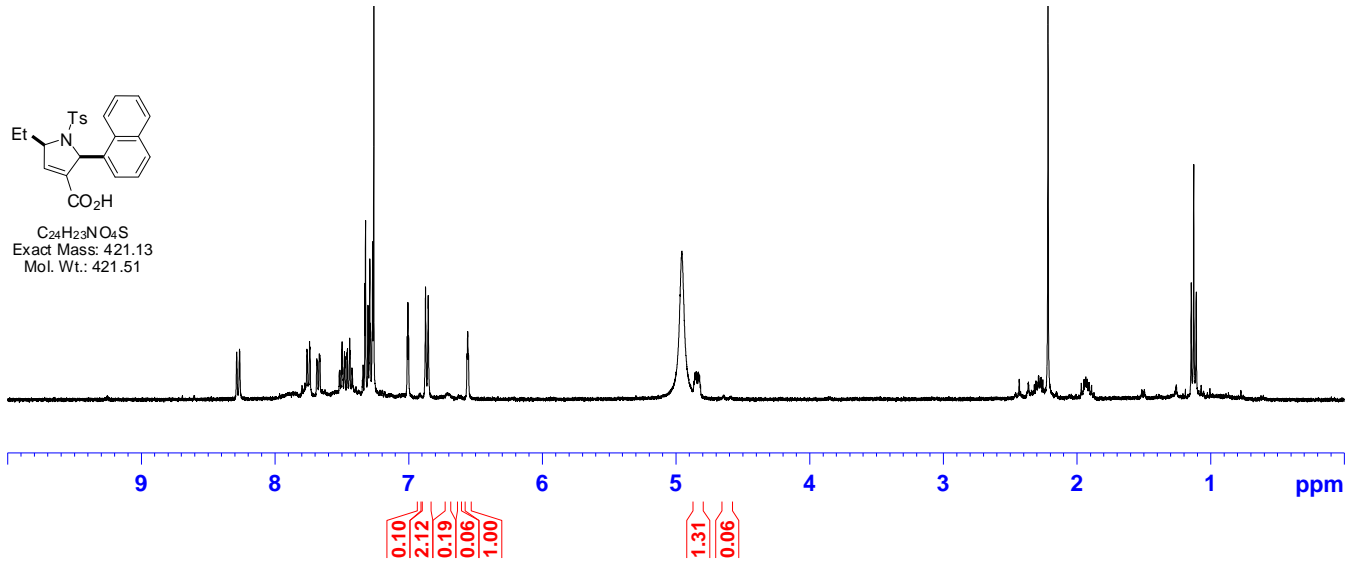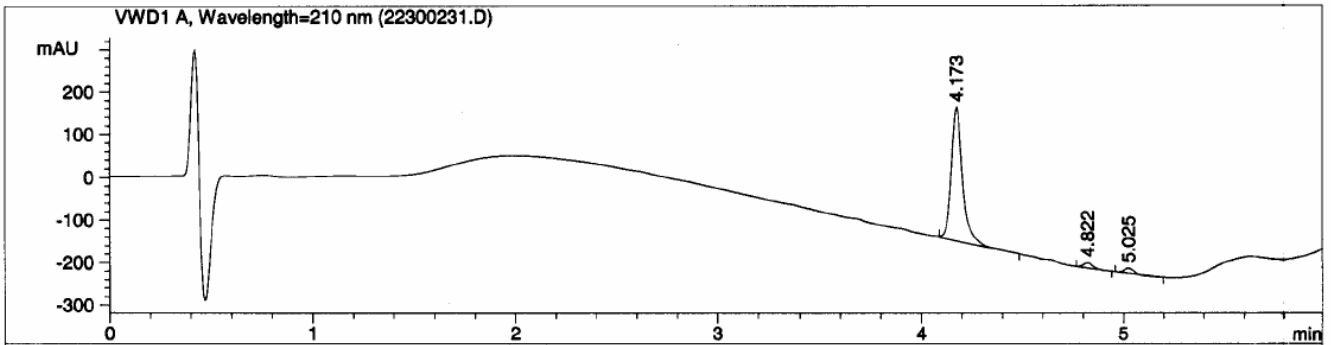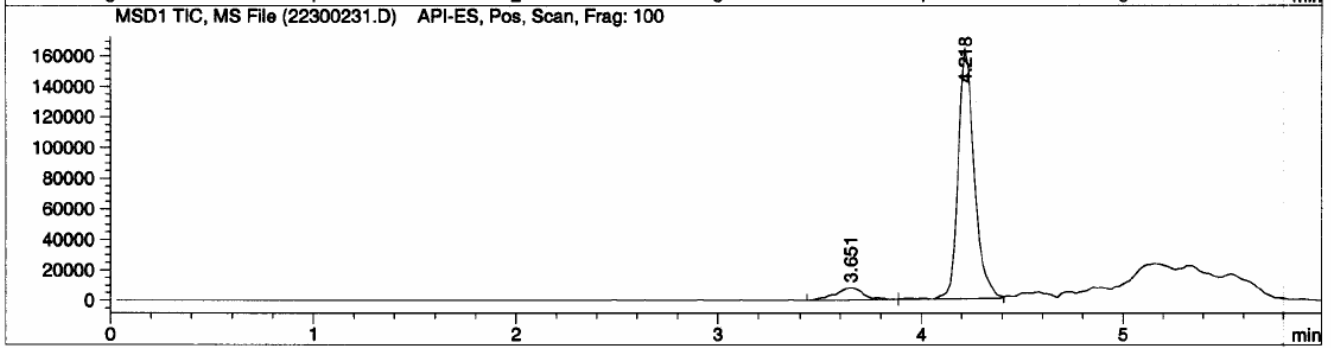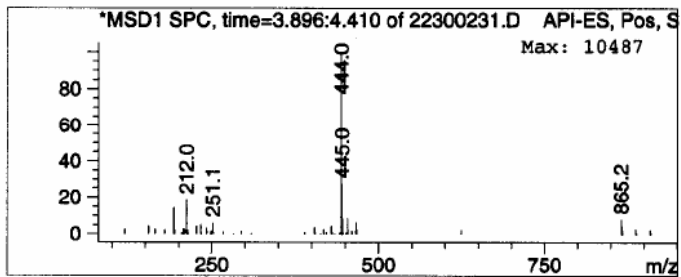

5-Ethyl-1-(methylsulfonyl)-2-phenyl-2,5-dihydro-1H-pyrrole-3-carboxylic acid (A05C19)

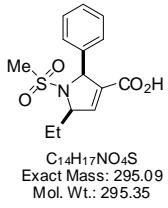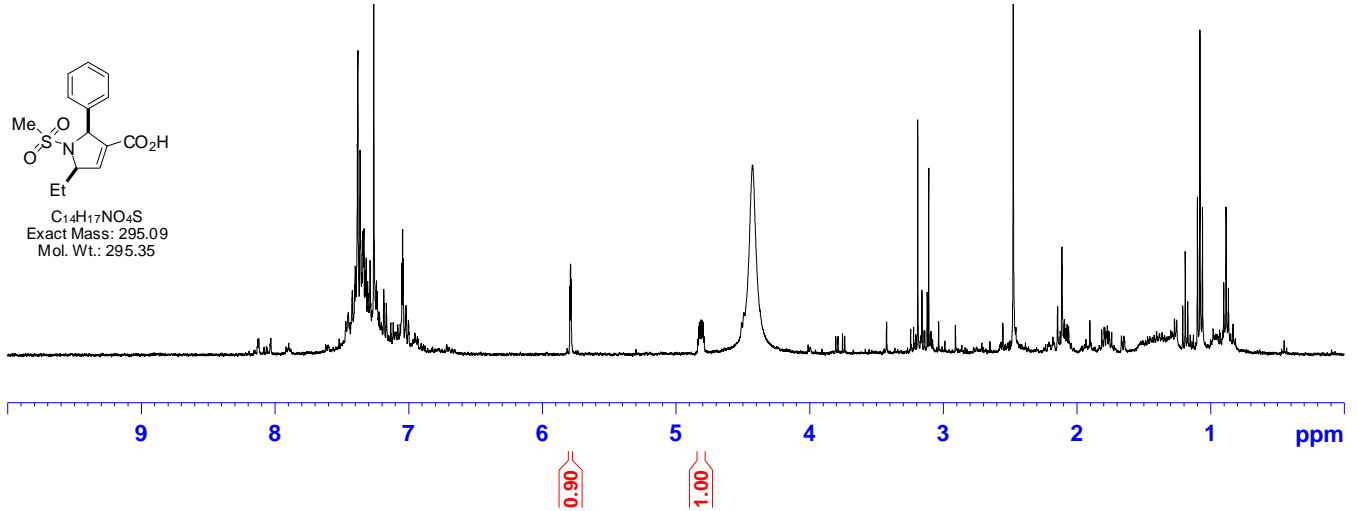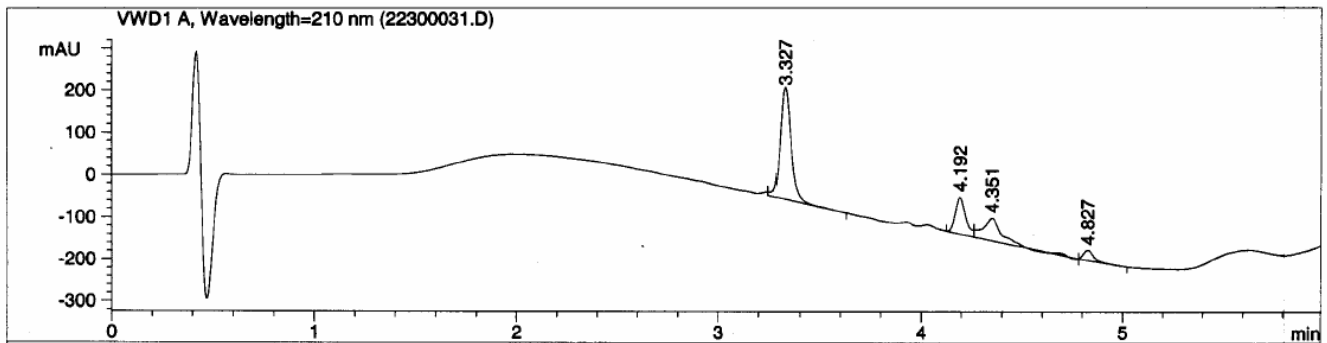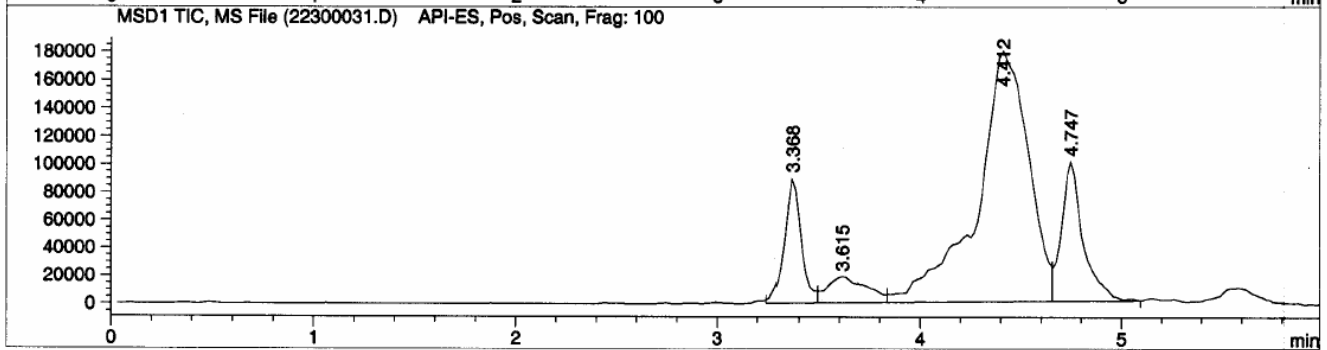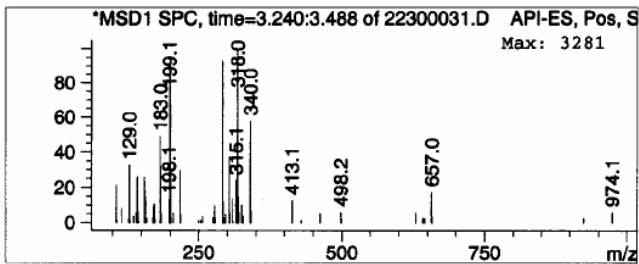

2-(3,4-Dimethoxyphenyl)-5-ethyl-1-tosyl-2,5-dihydro-1H-pyrrole-3-carboxylic acid (A05C20)

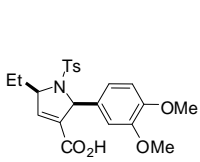

C<sub>22</sub>H<sub>26</sub>NO<sub>6</sub>S  
Exact Mass: 431.14  
Mol. Wt.: 431.5

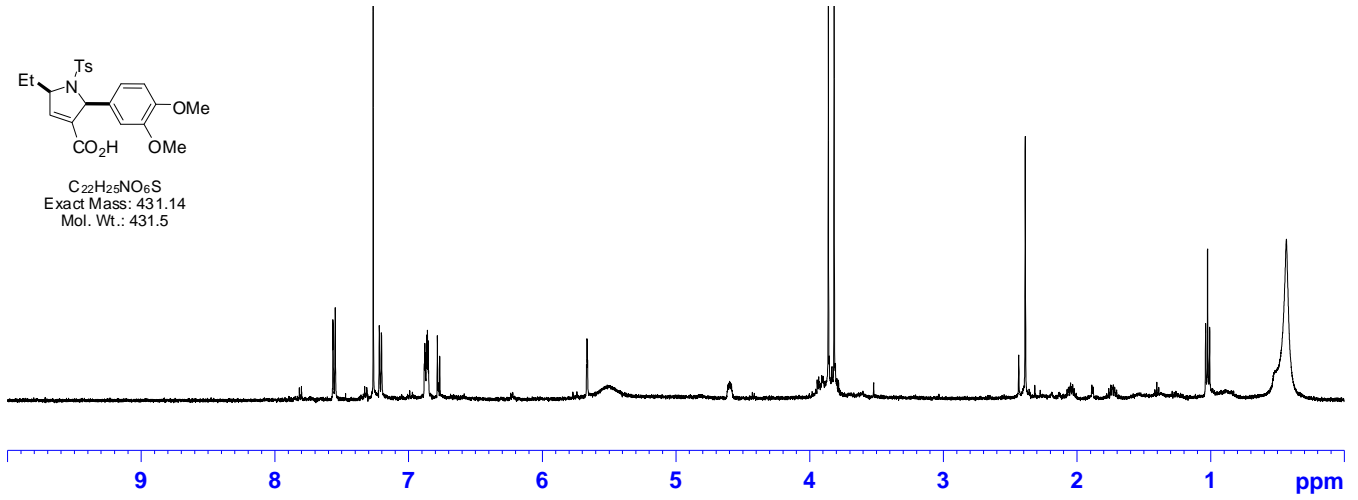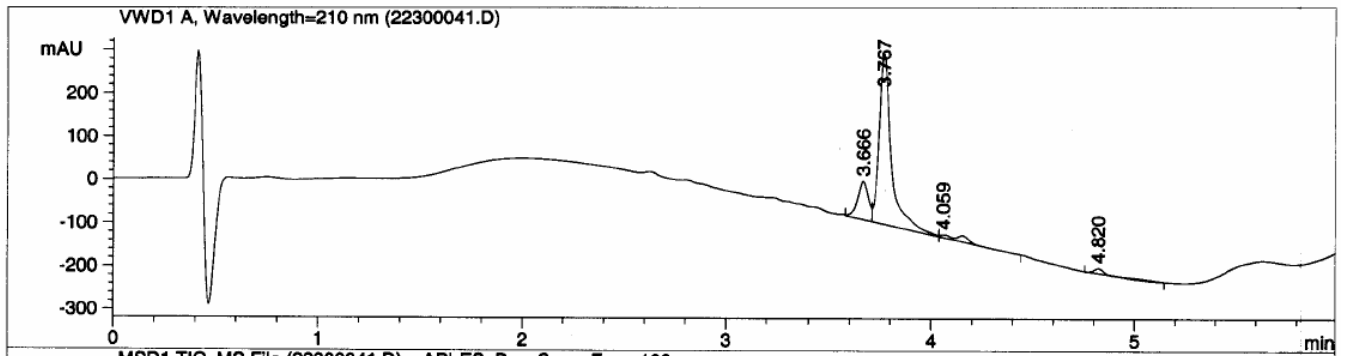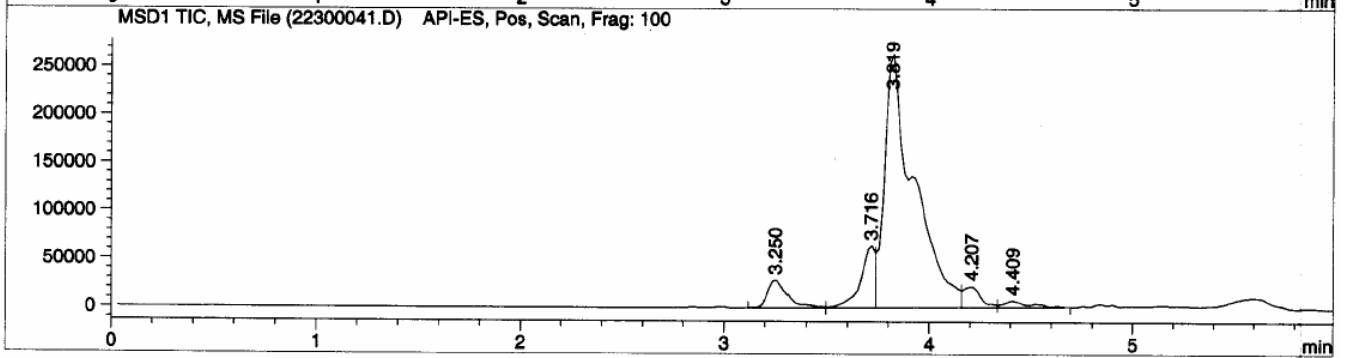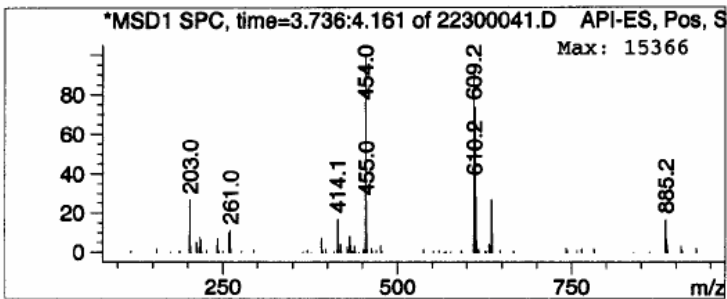

5-Ethyl-2-(4-fluorophenyl)-1-tosyl-2,5-dihydro-1H-pyrrole-3-carboxylic acid (A05C23)

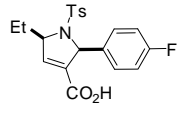

C<sub>20</sub>H<sub>20</sub>FNO<sub>4</sub>S  
Exact Mass: 389.11  
Mol. Wt.: 389.44

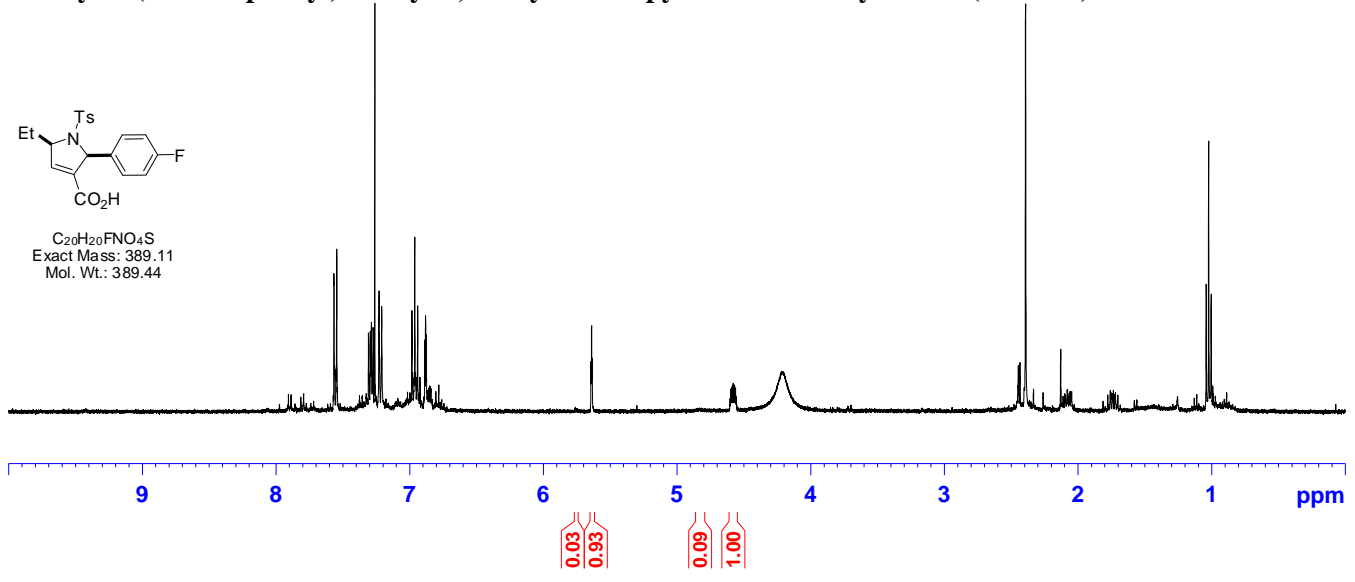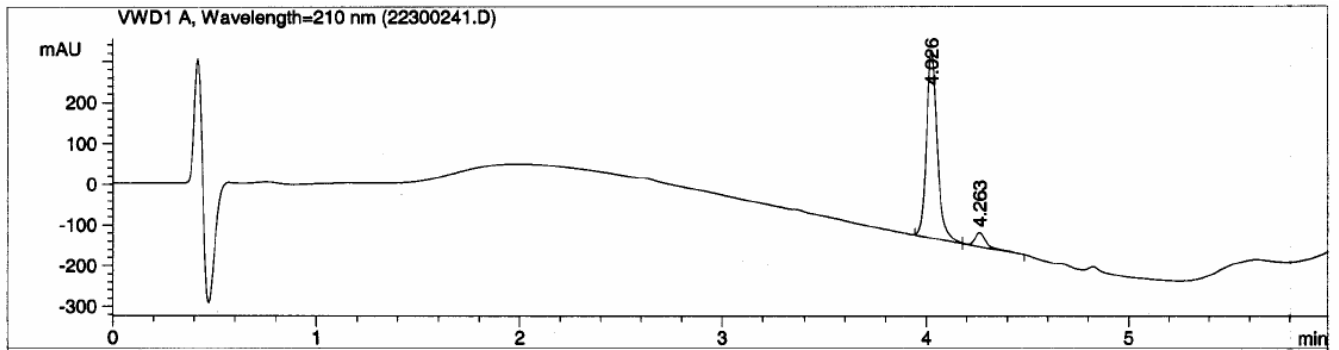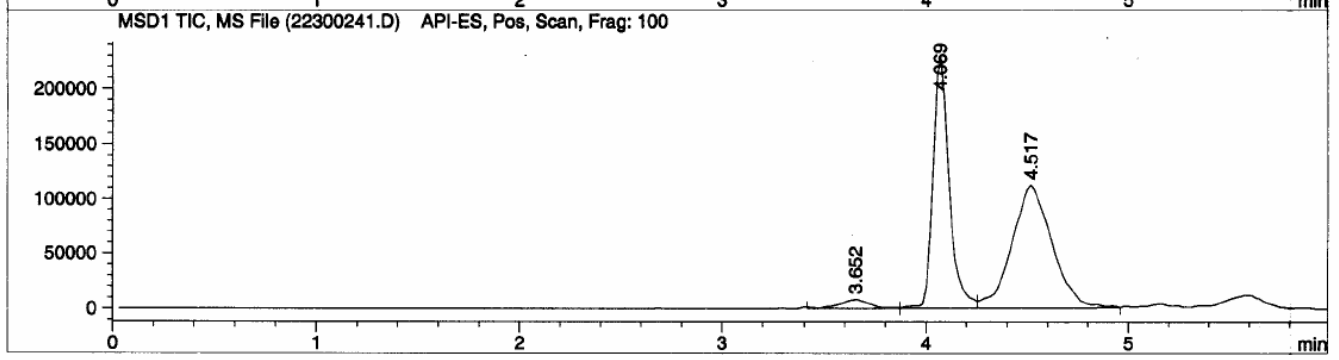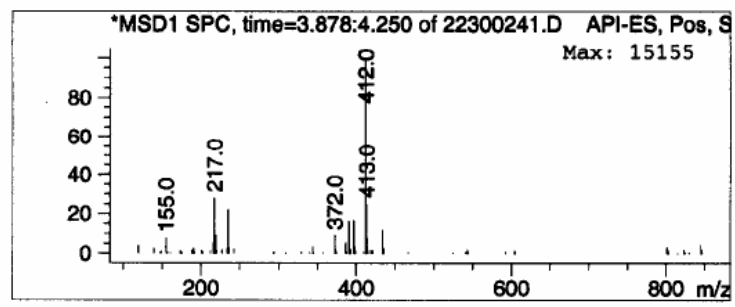

5-Ethyl-2-(4-isopropylphenyl)-1-tosyl-2,5-dihydro-1H-pyrrole-3-carboxylic acid (A05C24)

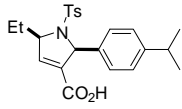

C<sub>23</sub>H<sub>27</sub>NO<sub>4</sub>S  
Exact Mass: 413.17  
Mol. Wt.: 413.53

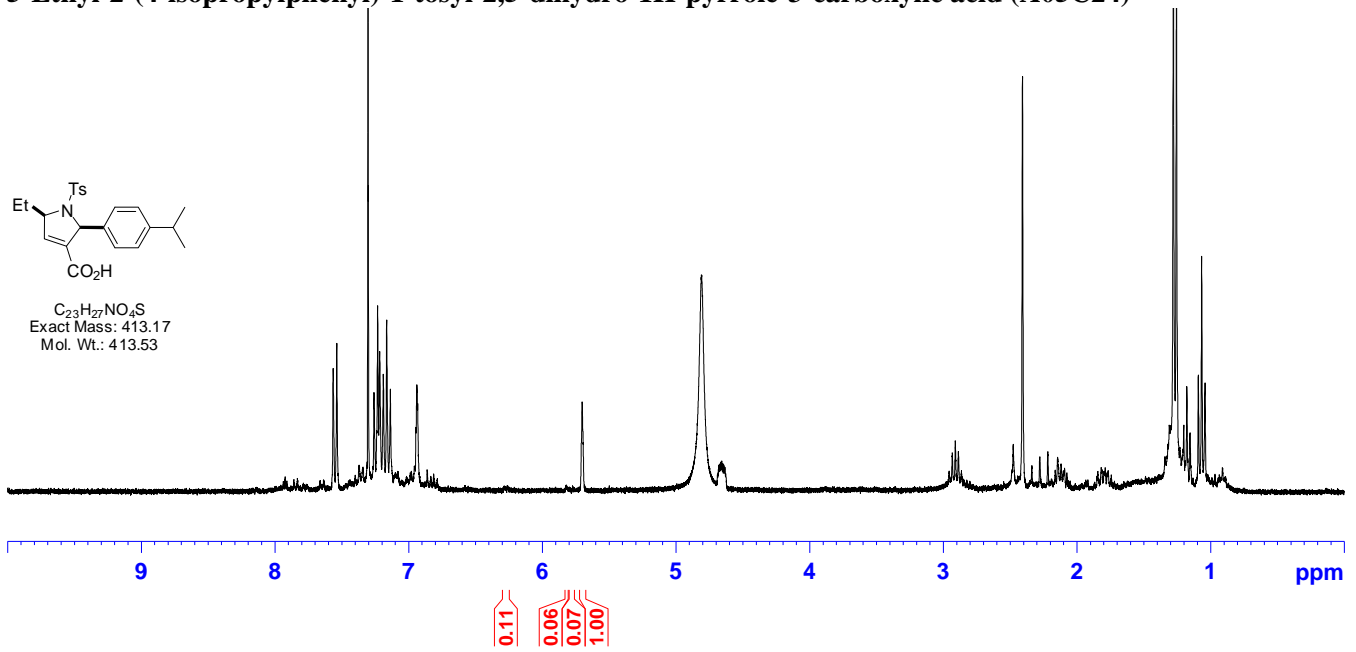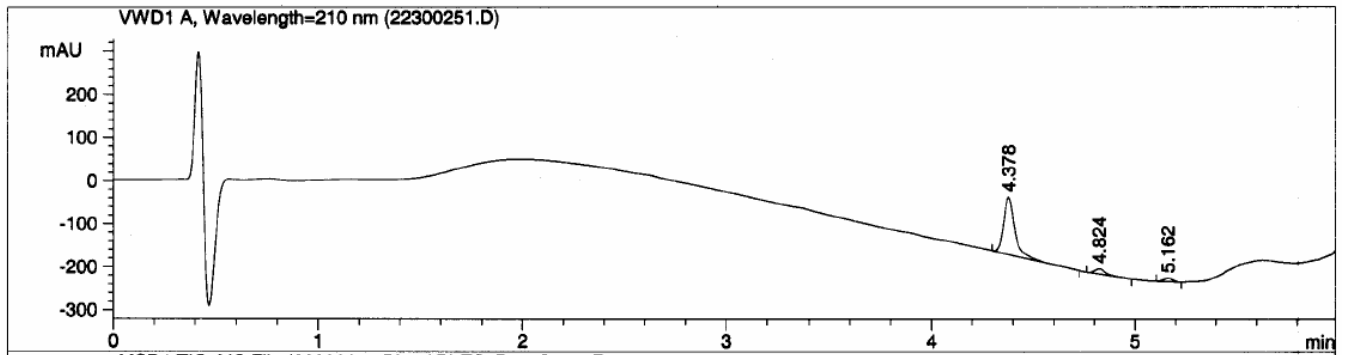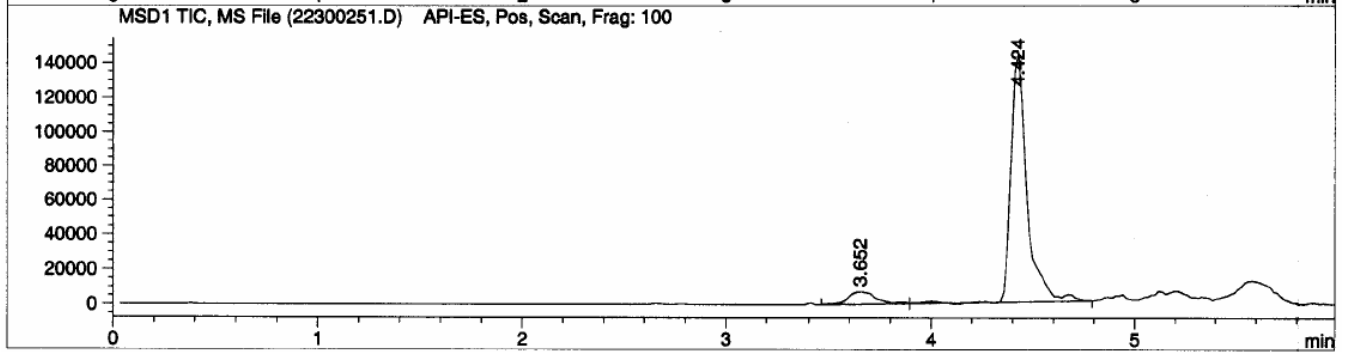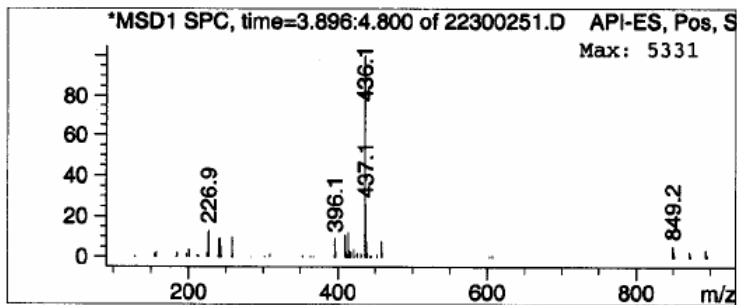

# 5-Ethyl-1-tosyl-2-(3,4,5-trimethoxyphenyl)-2,5-dihydro-1H-pyrrole-3-carboxylic acid (A05C25)

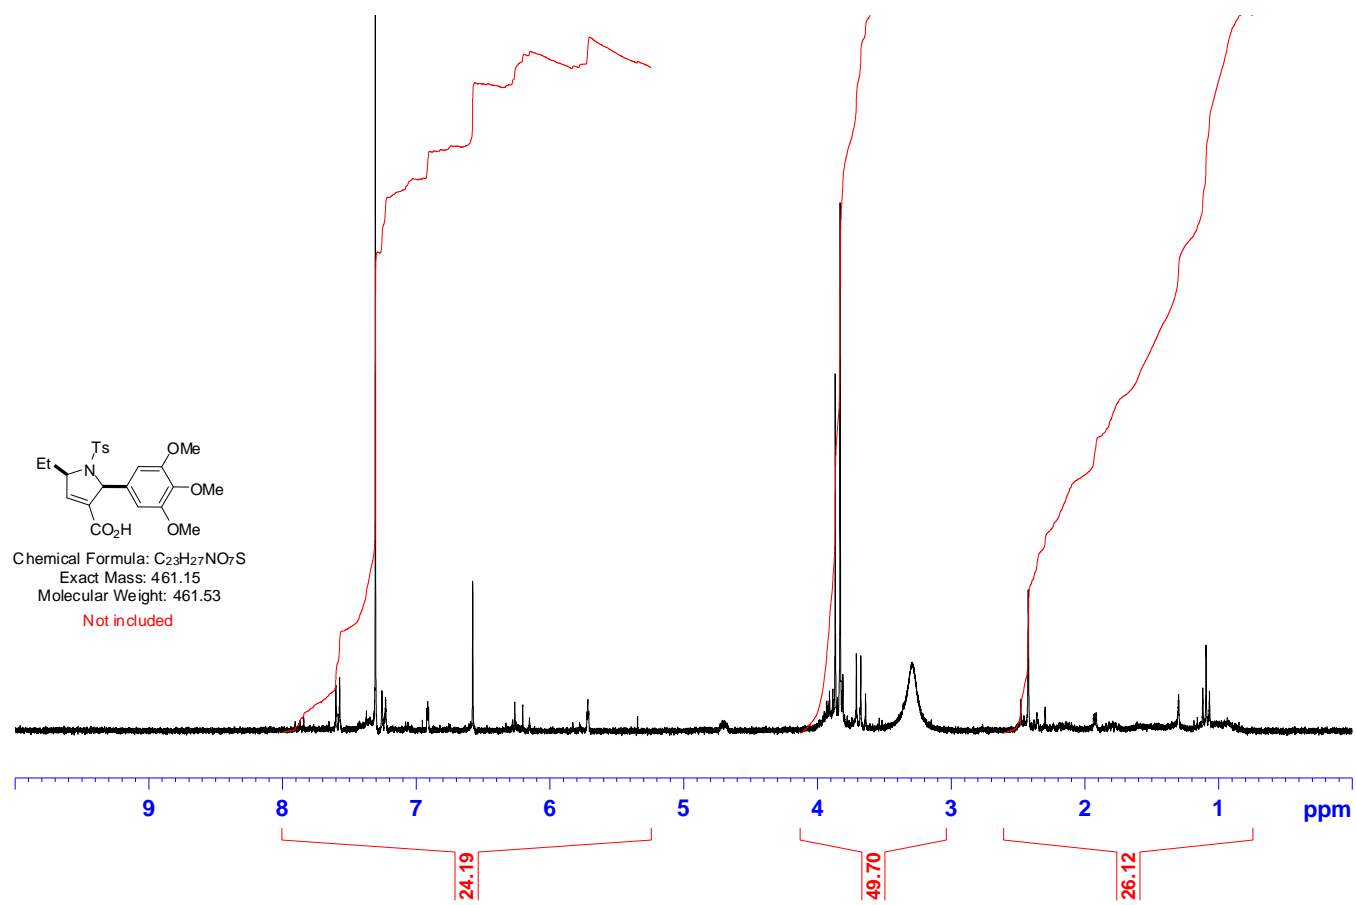



5-Ethyl-2-(3-fluorophenyl)-1-tosyl-2,5-dihydro-1H-pyrrole-3-carboxylic acid (A05C26)

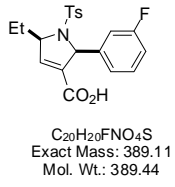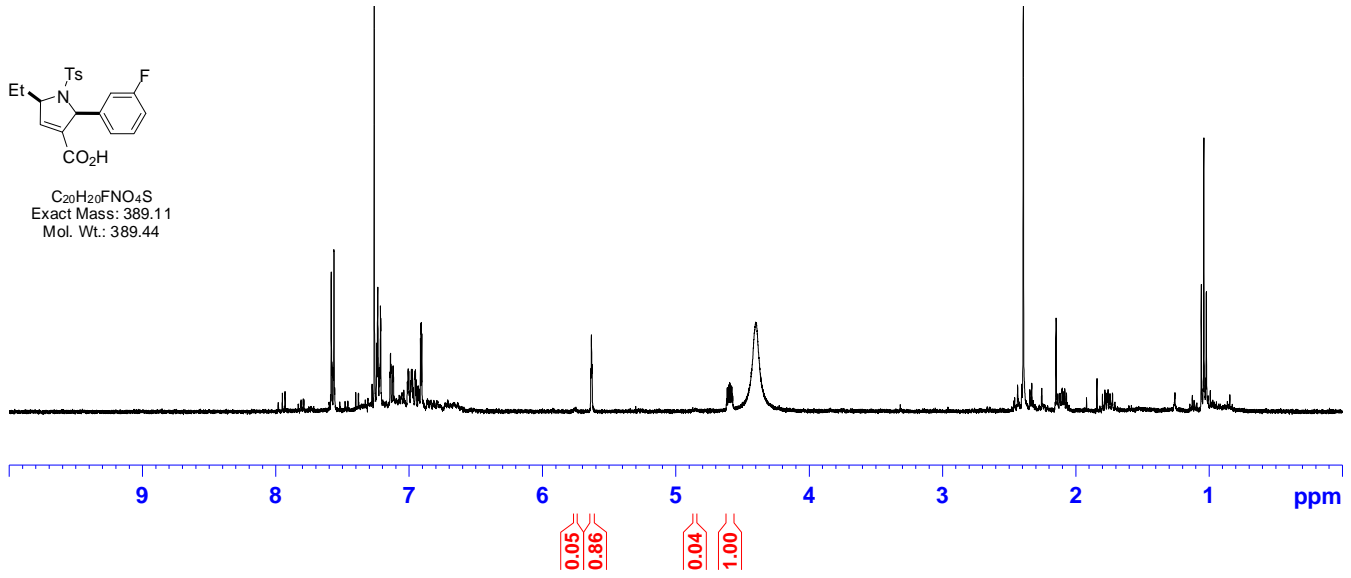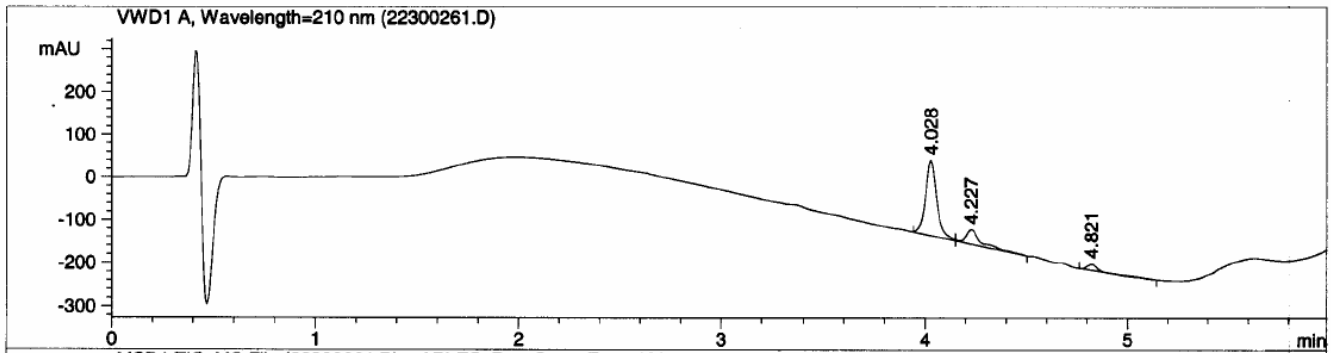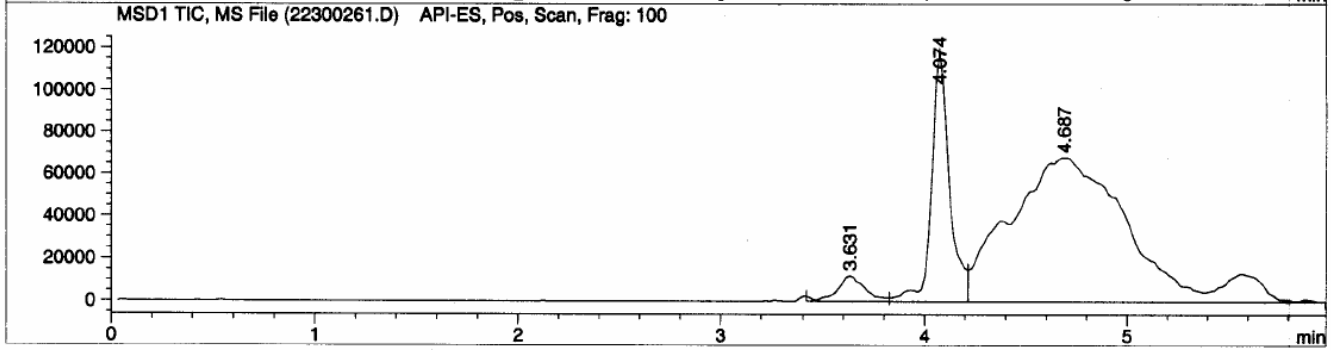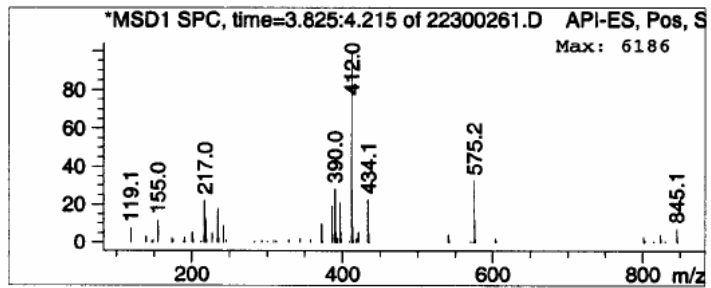

2-(4-Chlorophenyl)-1-(4-chlorophenylsulfonyl)-5-ethyl-2,5-dihydro-1H-pyrrole-3-carboxylic acid (A05C27)

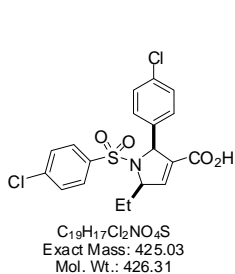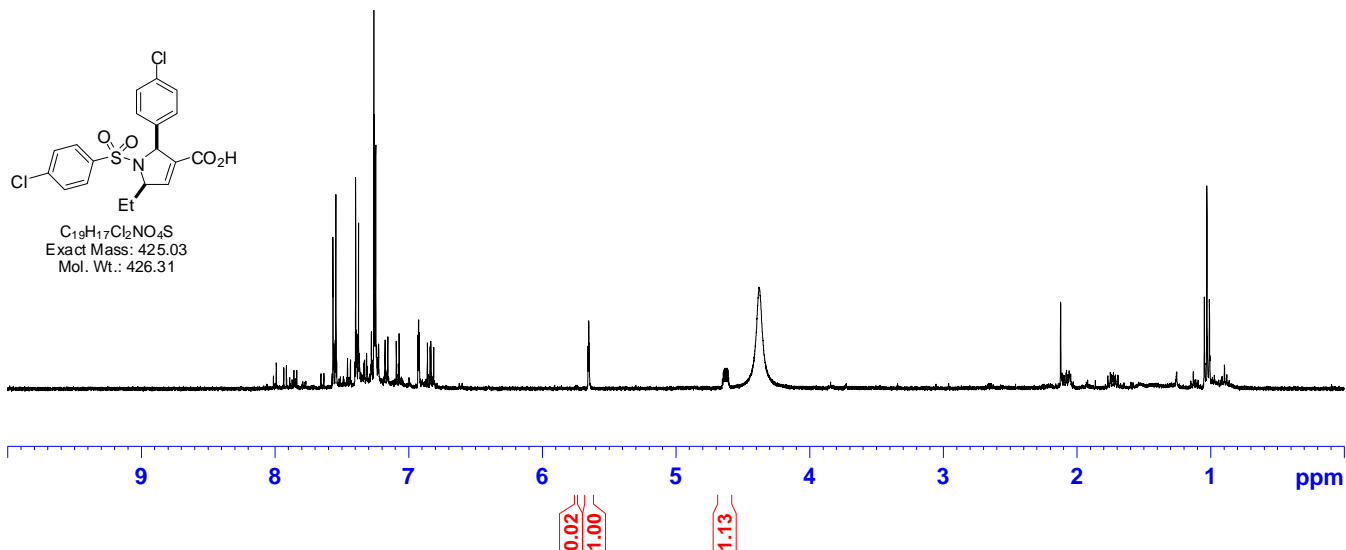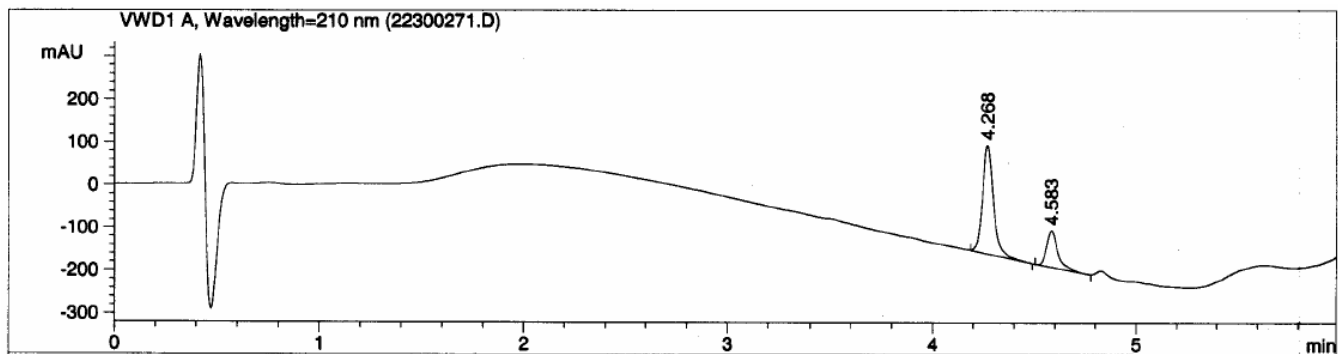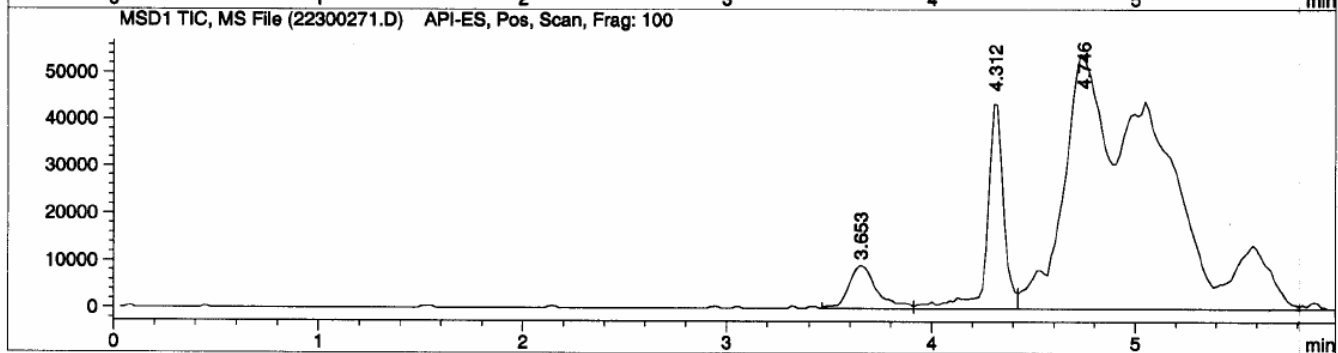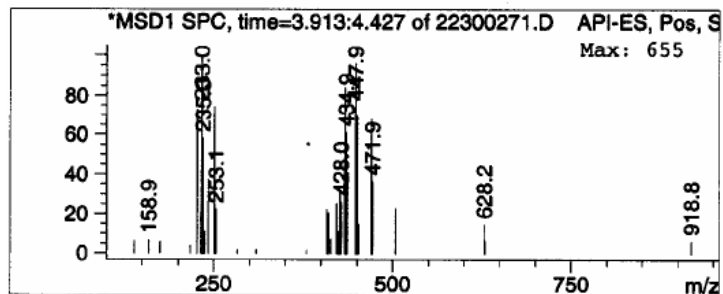

2-(4-Chlorophenyl)-5-ethyl-1-(methylsulfonyl)-2,5-dihydro-1H-pyrrole-3-carboxylic acid (A05C28)

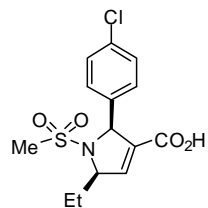

Chemical Formula: C<sub>14</sub>H<sub>16</sub>ClNO<sub>4</sub>S

Exact Mass: 329.05

Molecular Weight: 329.80

Not Included

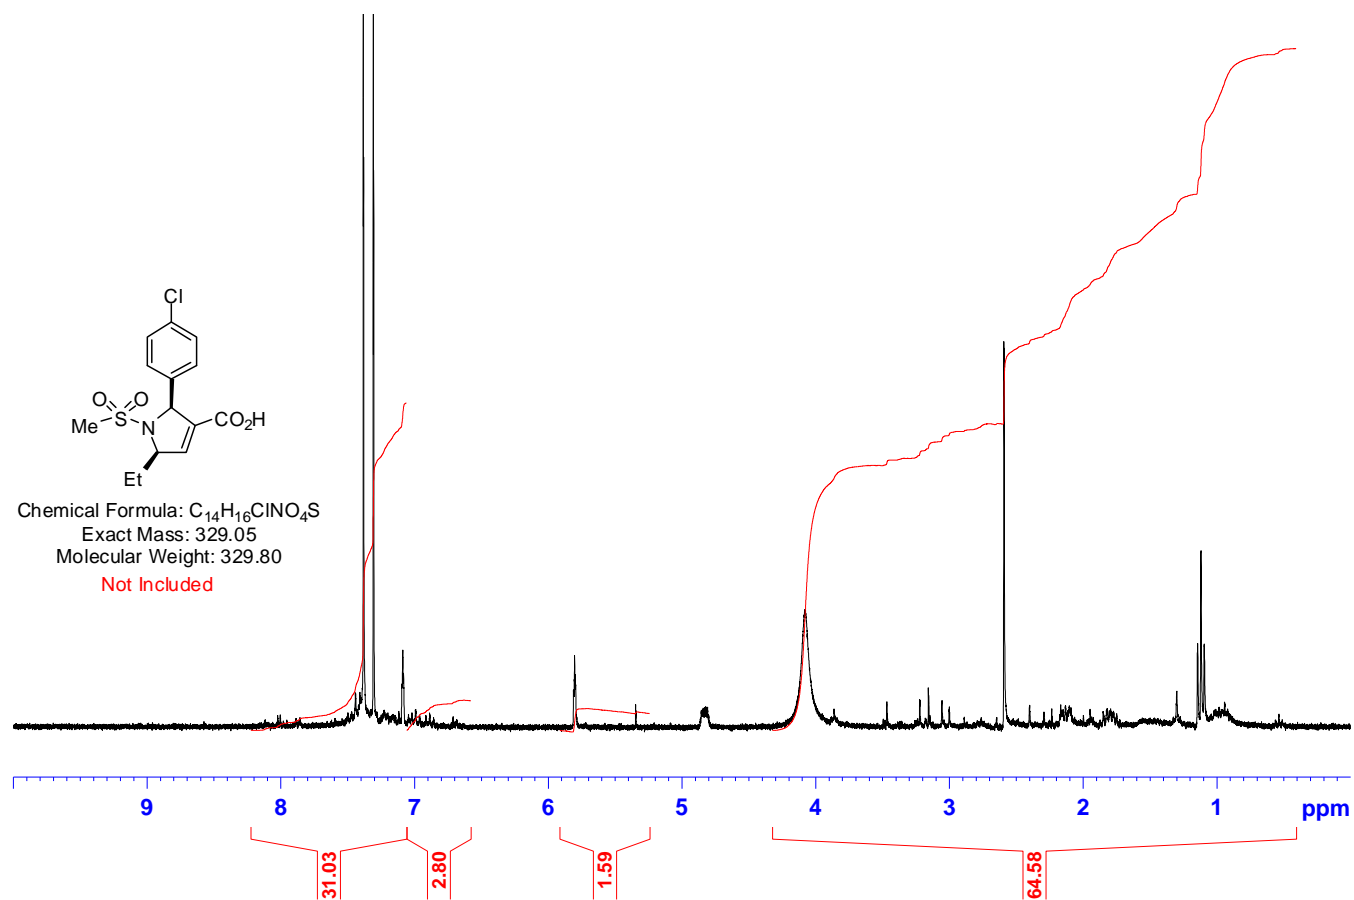

2-(4-Chlorophenyl)-5-ethyl-1-(phenylsulfonyl)-2,5-dihydro-1H-pyrrole-3-carboxylic acid (A05C29)

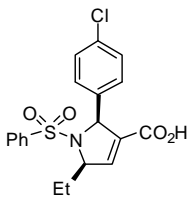

C<sub>19</sub>H<sub>18</sub>ClNO<sub>4</sub>S  
Exact Mass: 391.06  
Mol Wt: 391.87

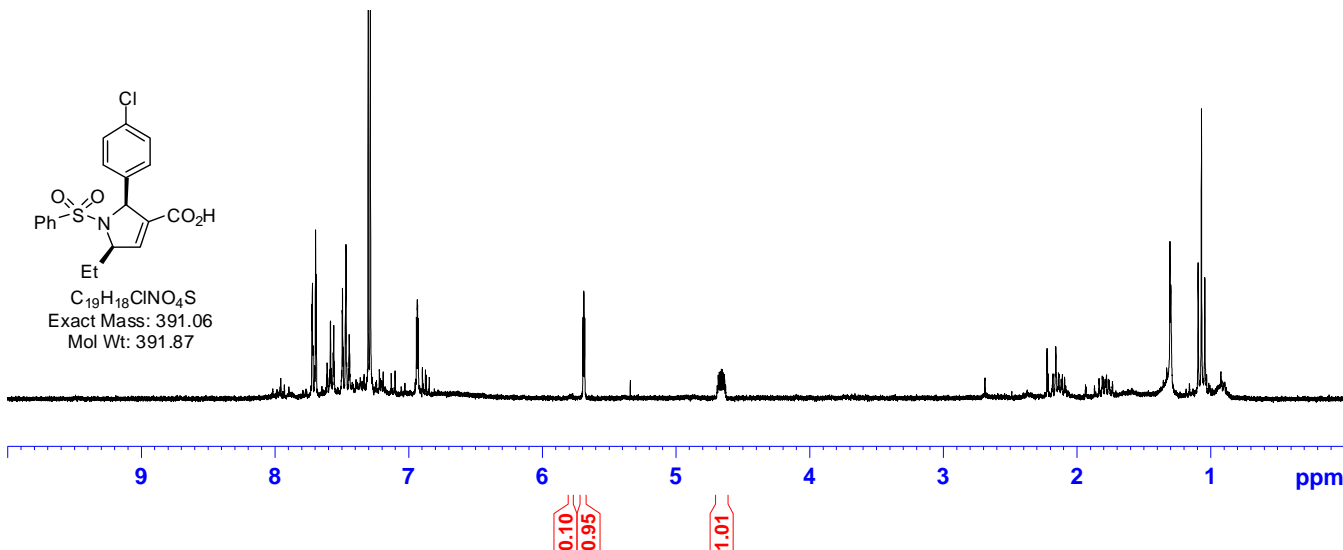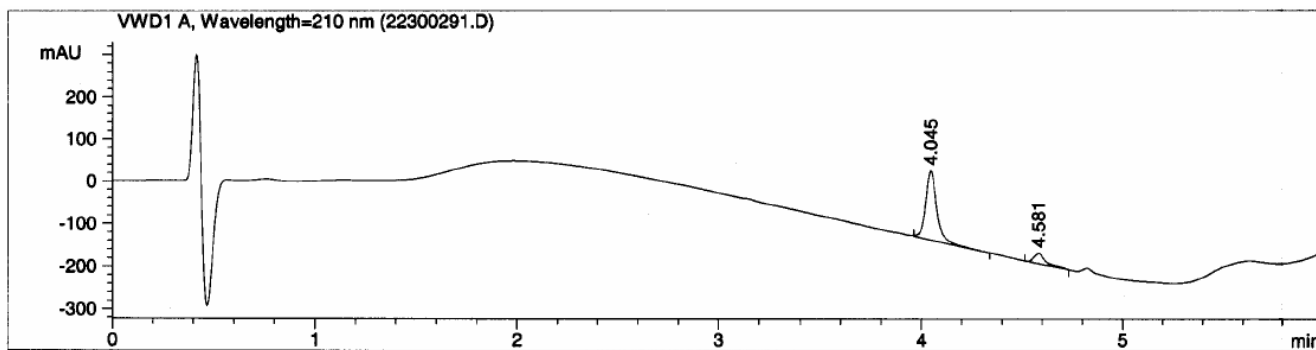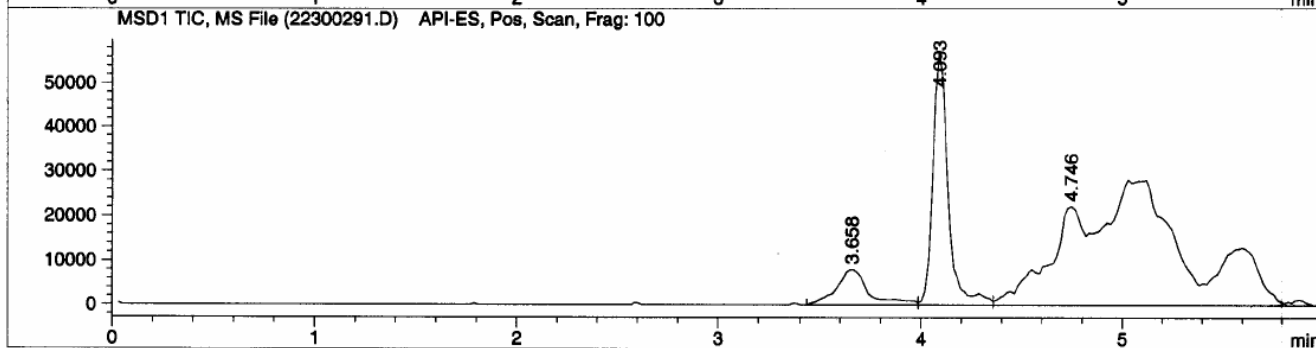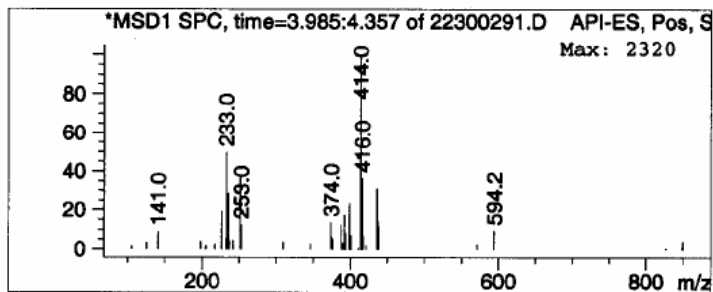

1-(4-Chlorophenylsulfonyl)-5-ethyl-2-(p-tolyl)-2,5-dihydro-1H-pyrrole-3-carboxylic acid (A05C30)

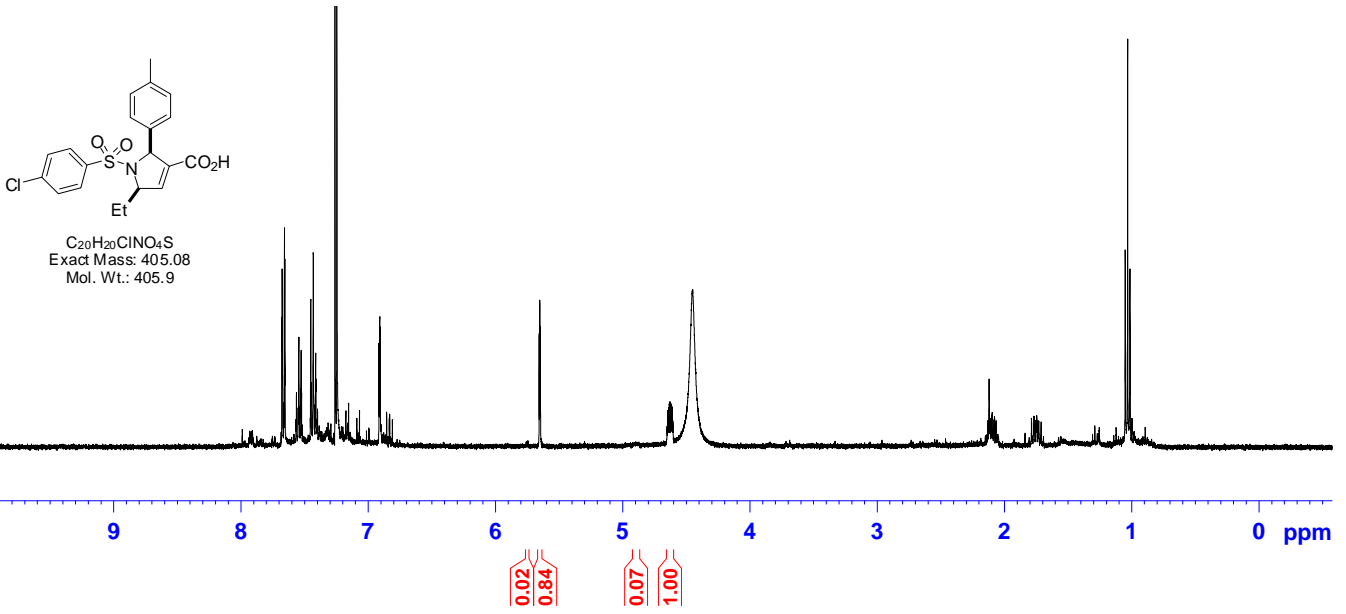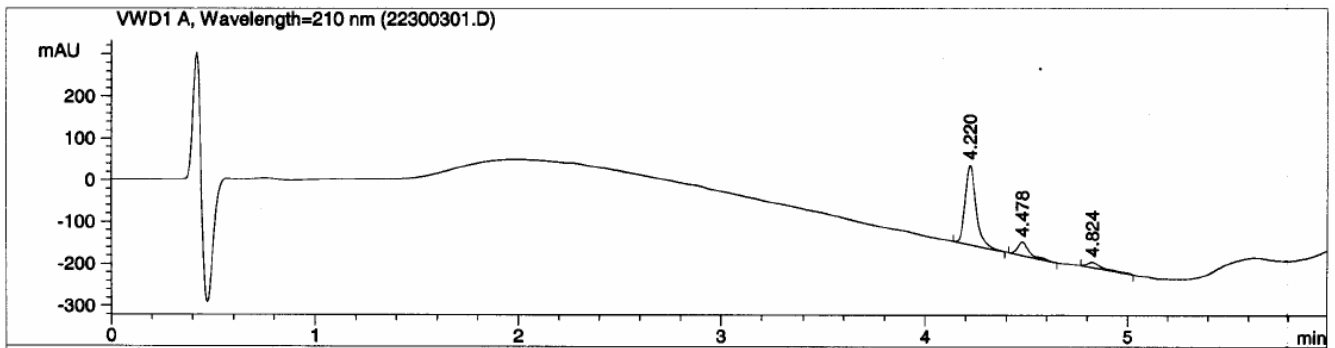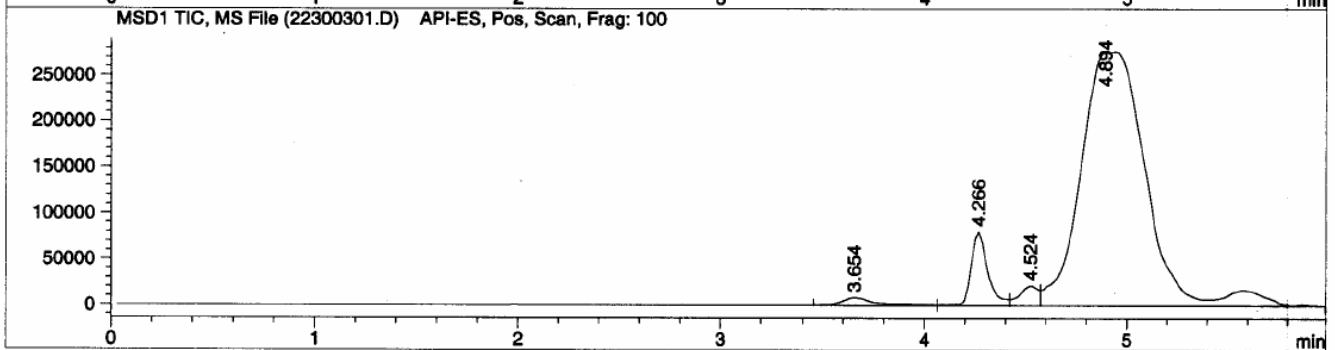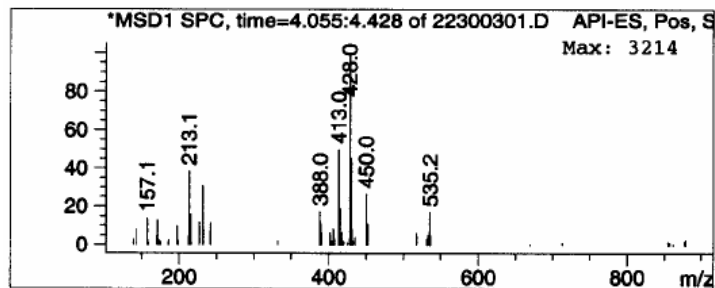

5-Ethyl-2-(*m*-tolyl)-1-tosyl-2,5-dihydro-1H-pyrrole-3-carboxylic acid (A05C33)

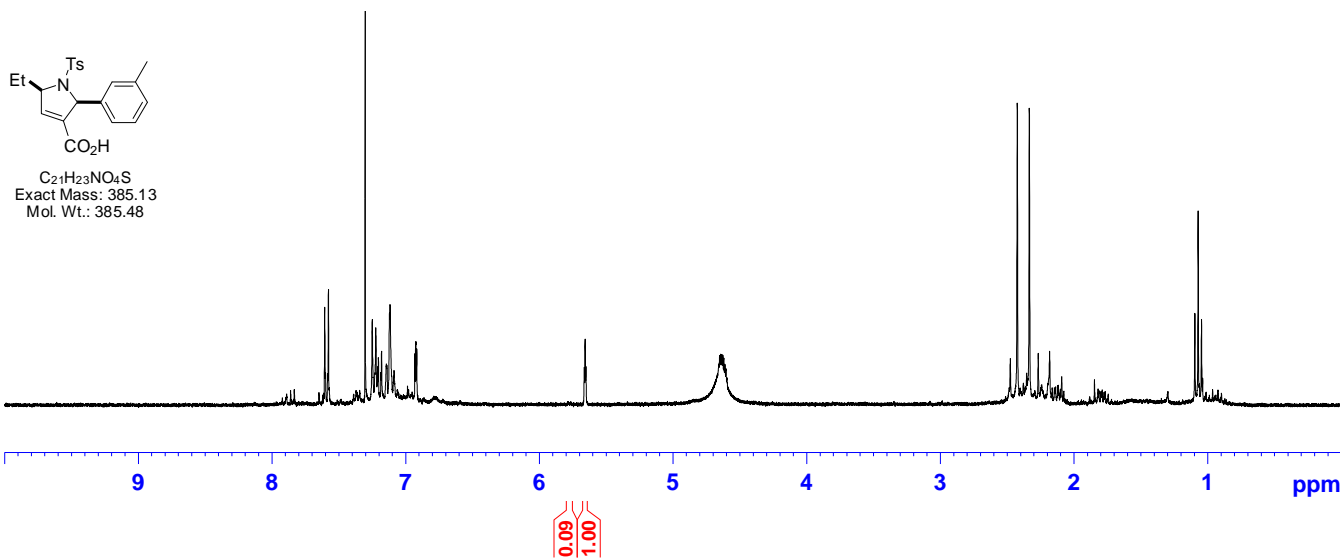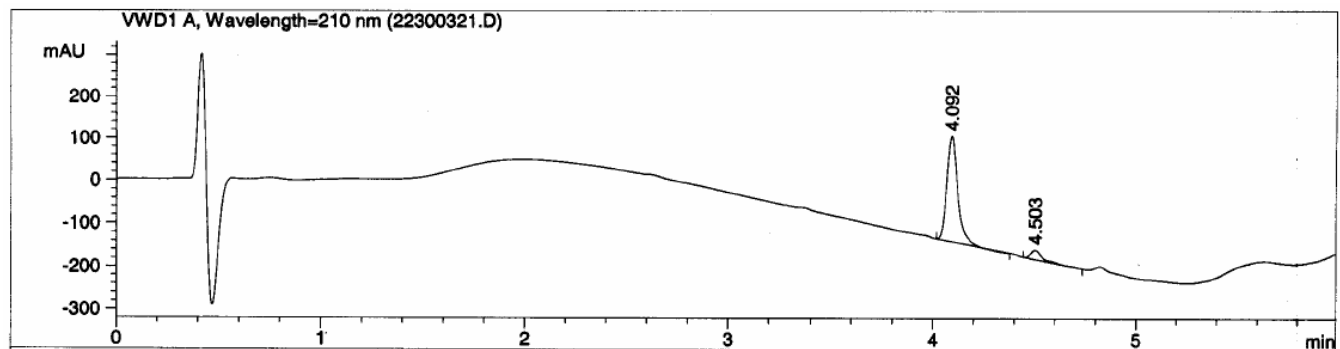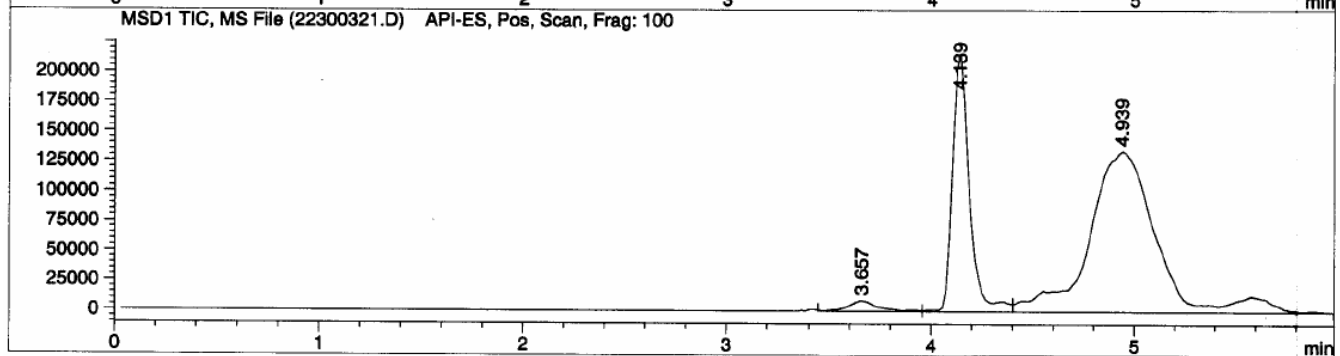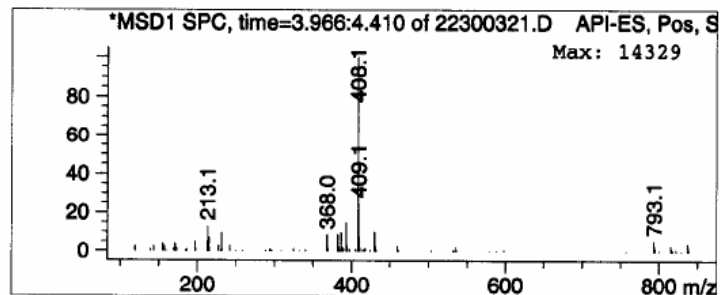

**5-Ethyl-1-(2-(methoxycarbonyl)phenylsulfonyl)-2-(4-methoxyphenyl)-2,5-dihydro-1H-pyrrole-3-carboxylic acid (A05C34)**

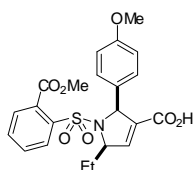

Chemical Formula: C<sub>22</sub>H<sub>23</sub>NO<sub>7</sub>S  
Exact Mass: 445.12  
Molecular Weight: 445.49  
Not included

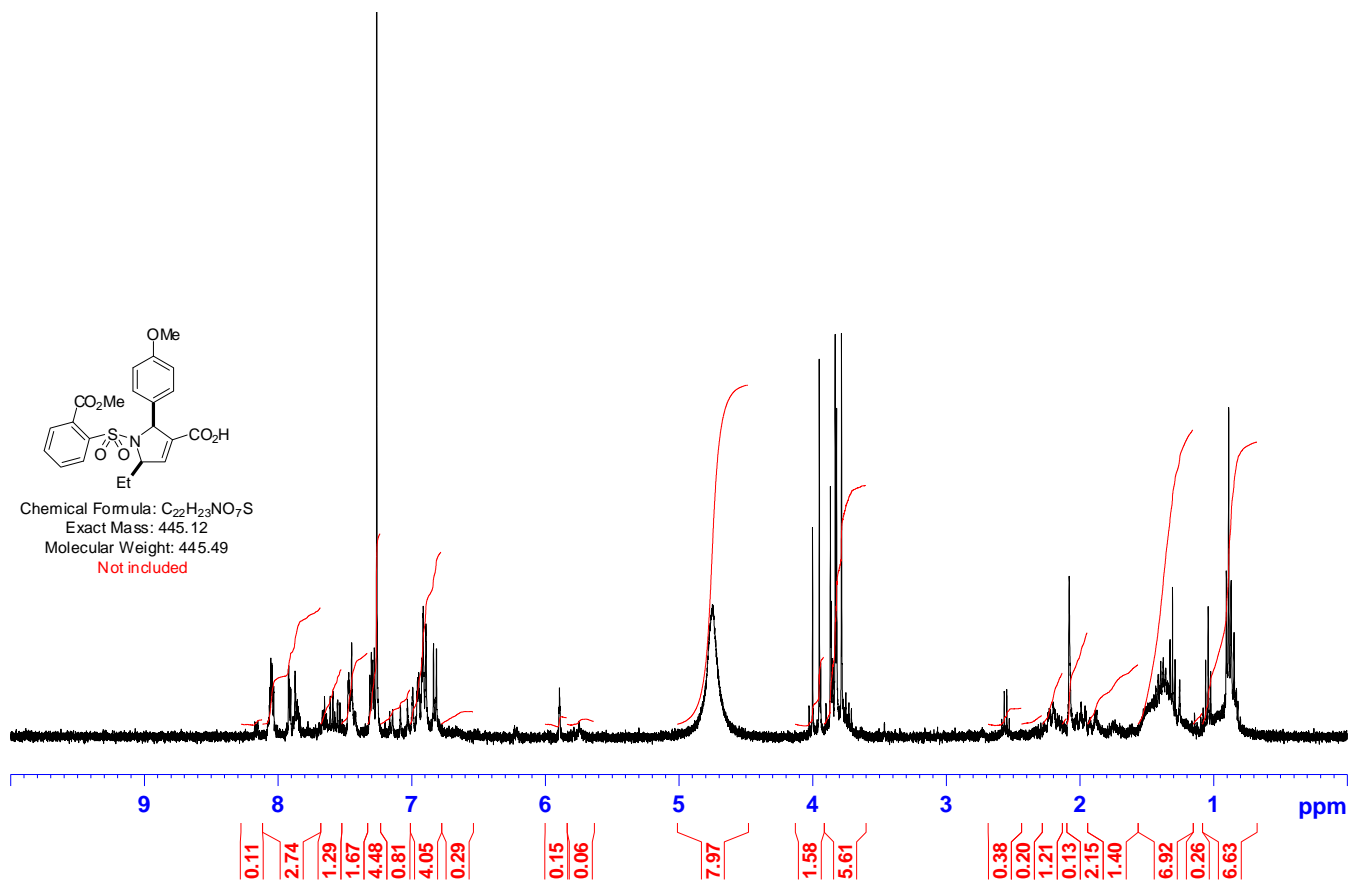

5-Ethyl-2-(4-methoxyphenyl)-1-(phenylsulfonyl)-2,5-dihydro-1H-pyrrole-3-carboxylic acid (A05C35)

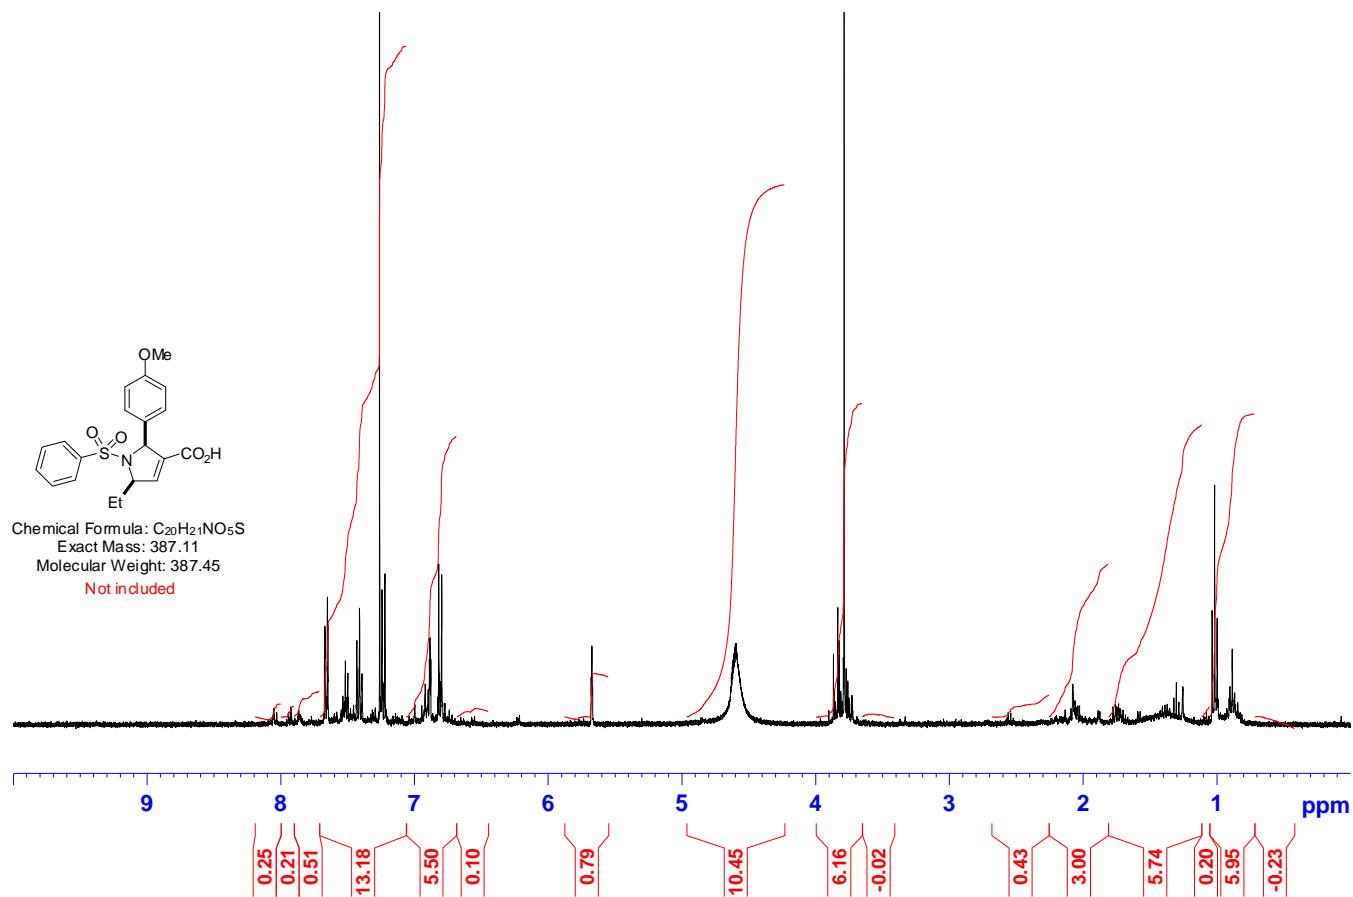



5-Ethyl-1-(2-nitrophenylsulfonyl)-2-*p*-tolyl-2,5-dihydro-1H-pyrrole-3-carboxylic acid (A05C36)

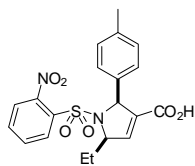

Chemical Formula: C<sub>20</sub>H<sub>20</sub>N<sub>2</sub>O<sub>6</sub>S  
Exact Mass: 416.10  
Molecular Weight: 416.45  
Not included

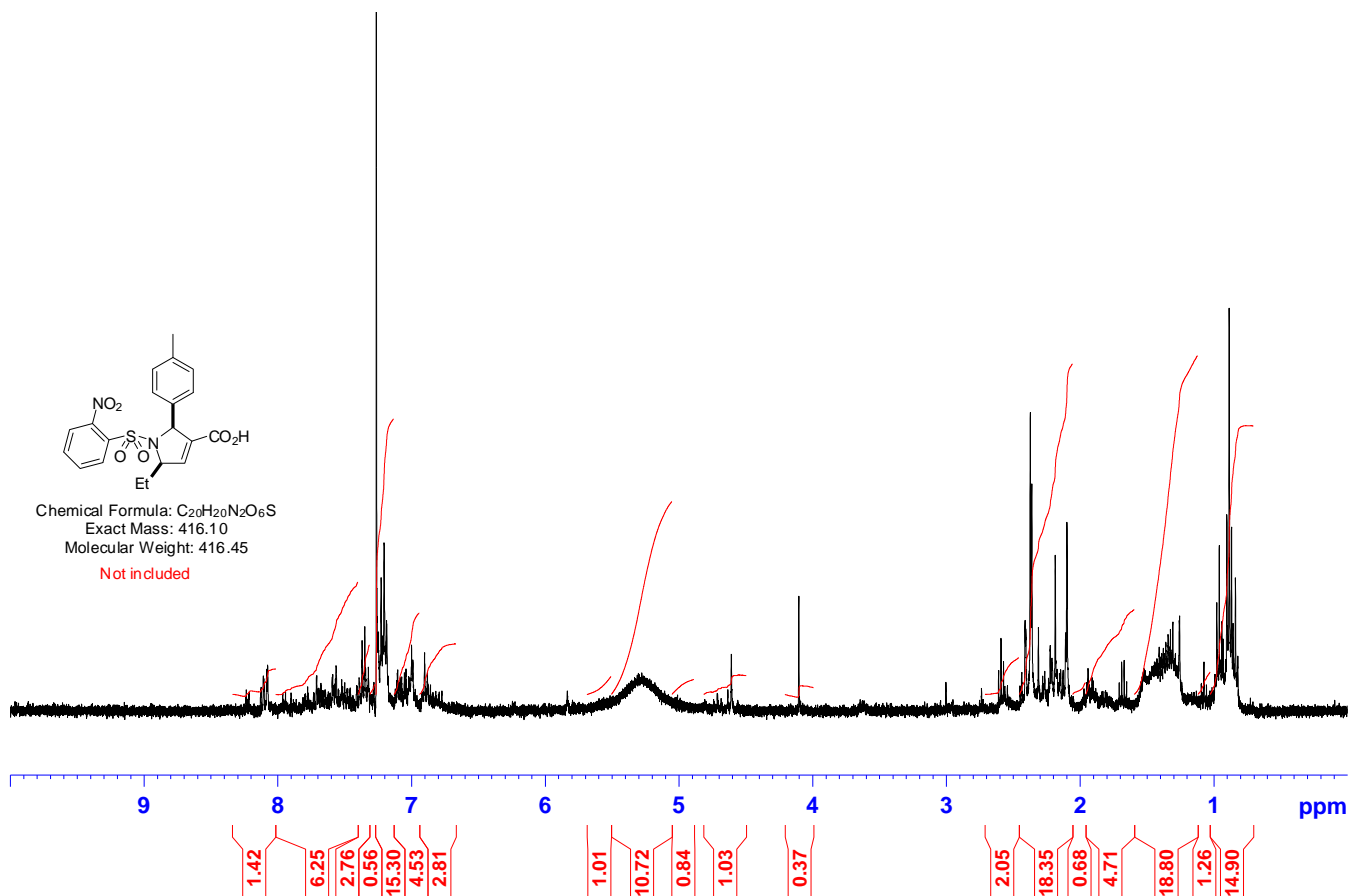

# 1-(4-Chlorophenylsulfonyl)-5-ethyl-2-(4-methoxyphenyl)-2,5-dihydro-1H-pyrrole-3-carboxylic acid (A05C37)

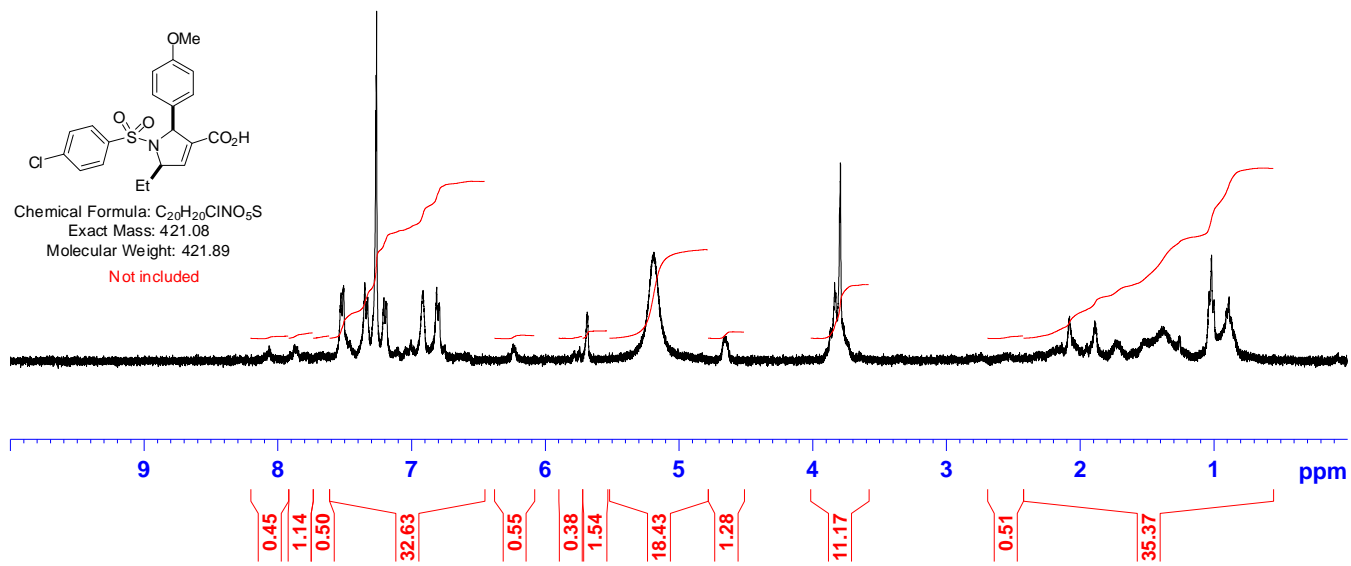

**5-Ethyl-2-(4-methoxyphenyl)-1-(o-tolylsulfonyl)-2,5-dihydro-1H-pyrrole-3-carboxylic acid (A05C38)**

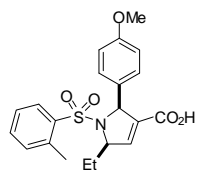

Chemical Formula: C<sub>21</sub>H<sub>23</sub>NO<sub>5</sub>S  
Exact Mass: 401.13  
Molecular Weight: 401.48  
Not included

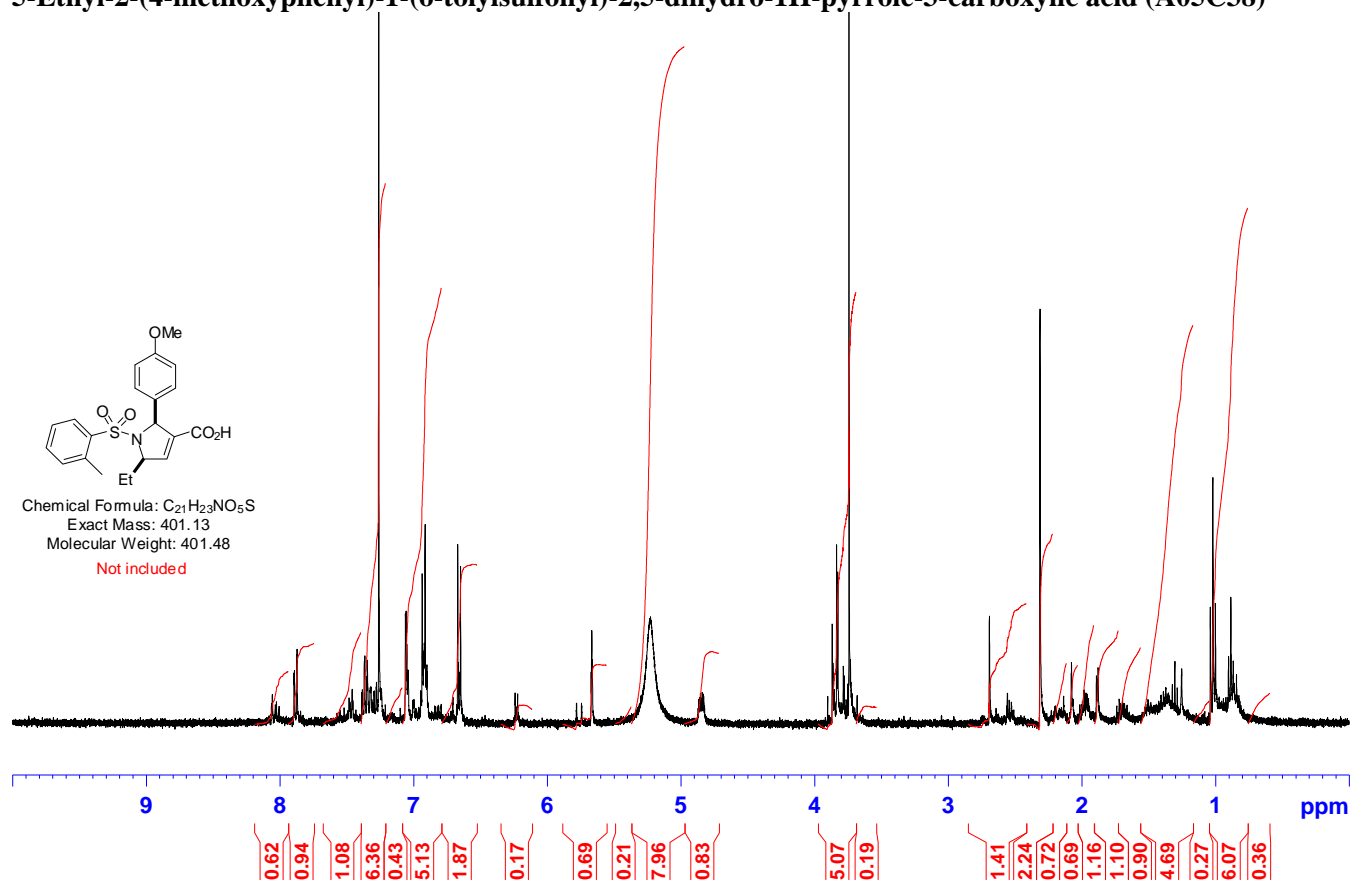

# 5-Ethyl-2-(3-methoxyphenyl)-1-tosyl-2,5-dihydro-1H-pyrrole-3-carboxylic acid (A05C39)

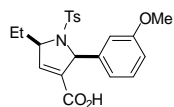

Chemical Formula: C<sub>21</sub>H<sub>23</sub>NO<sub>5</sub>S  
Exact Mass: 401.13  
Molecular Weight: 401.48  
Not included

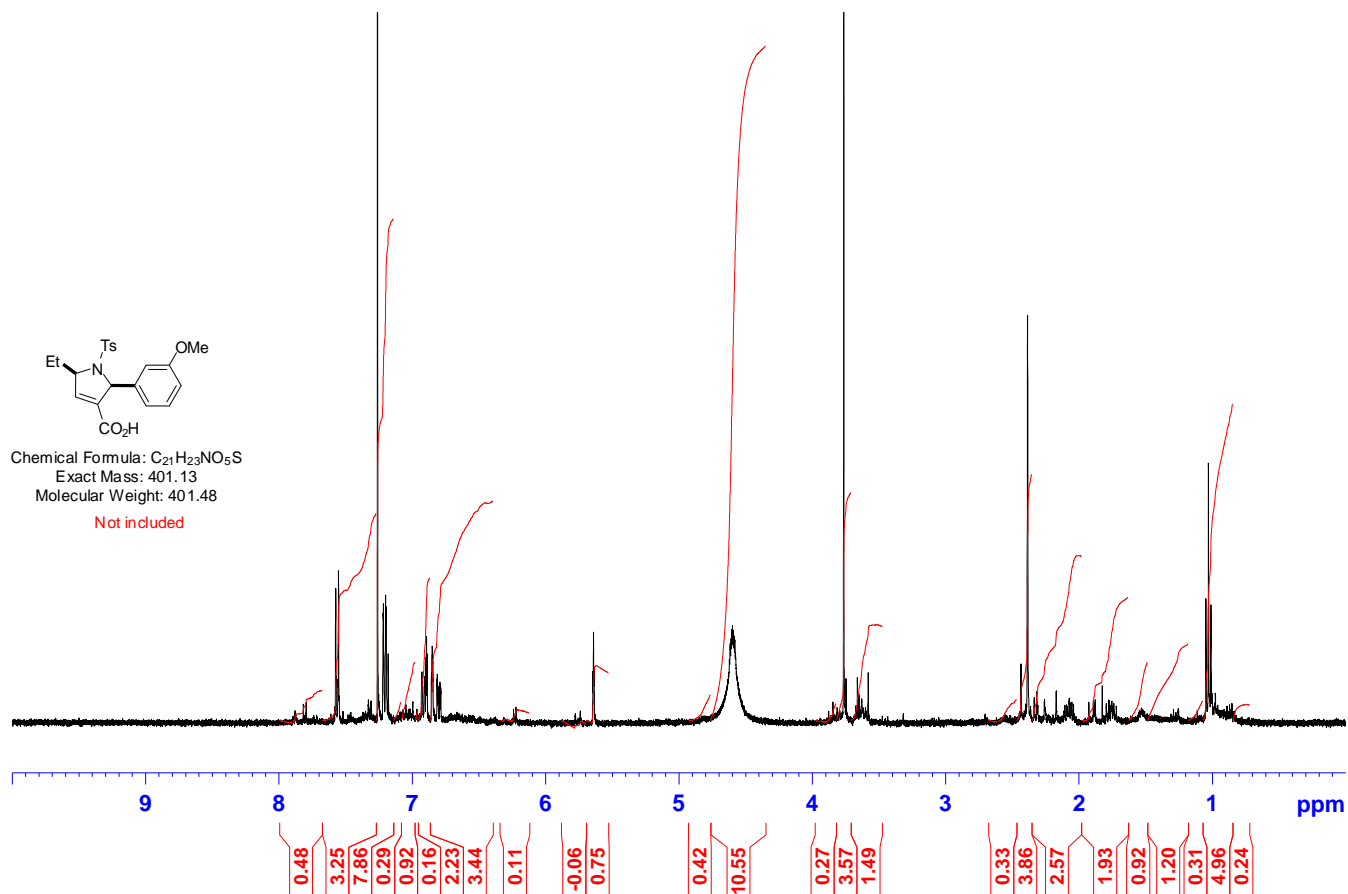

2-(4-Chlorophenyl)-5-ethyl-1-(*o*-tolylsulfonyl)-2,5-dihydro-1H-pyrrole-3-carboxylic acid (A05C40)

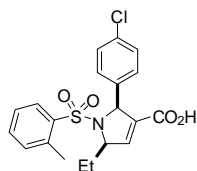

C<sub>20</sub>H<sub>20</sub>ClNO<sub>4</sub>S  
 Exact Mass: 405.08  
 Mol. Wt.: 405.9

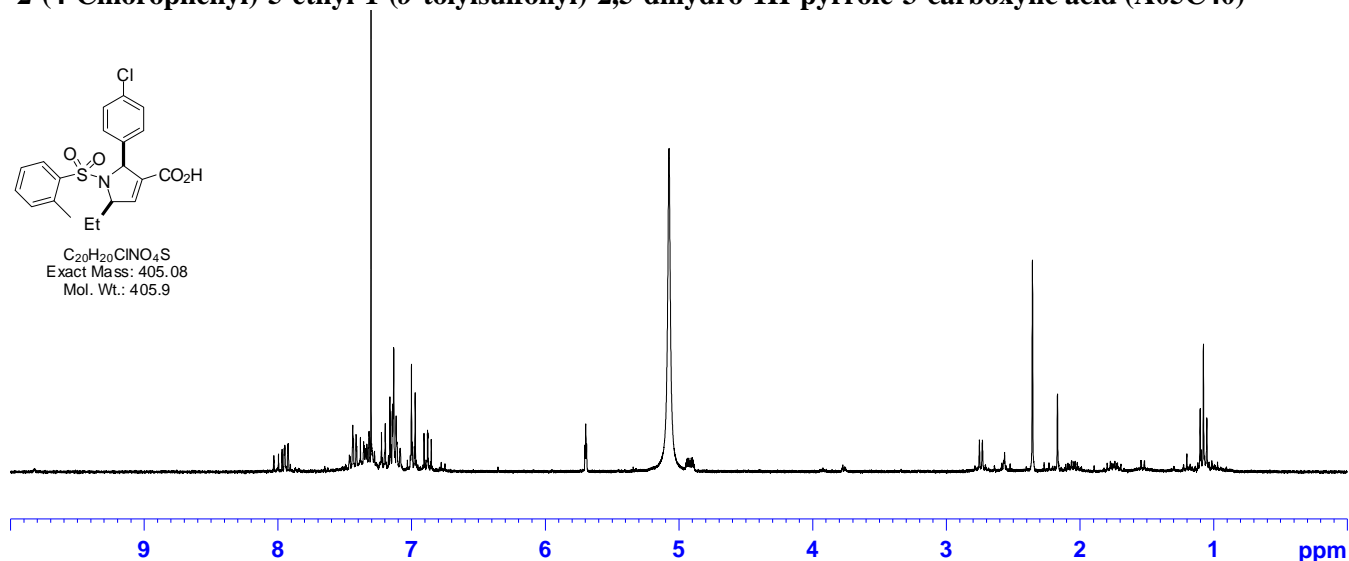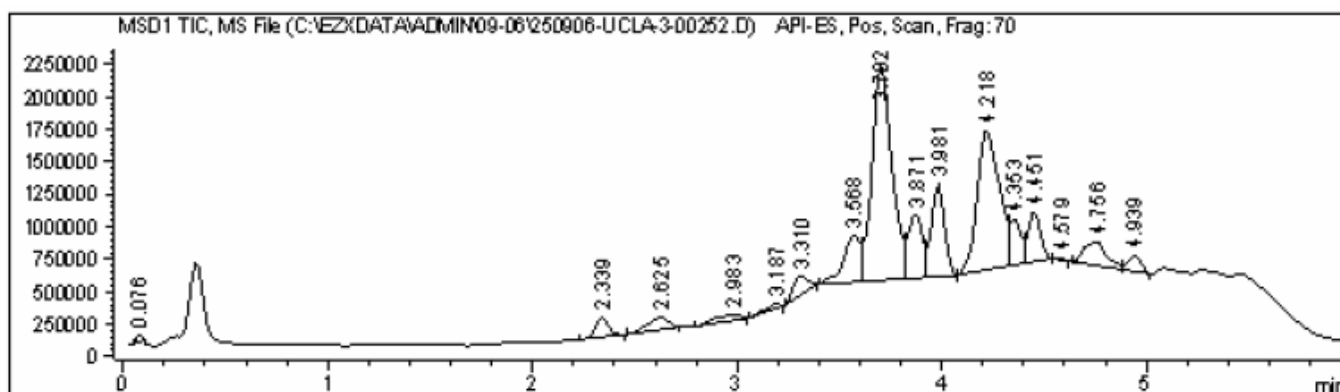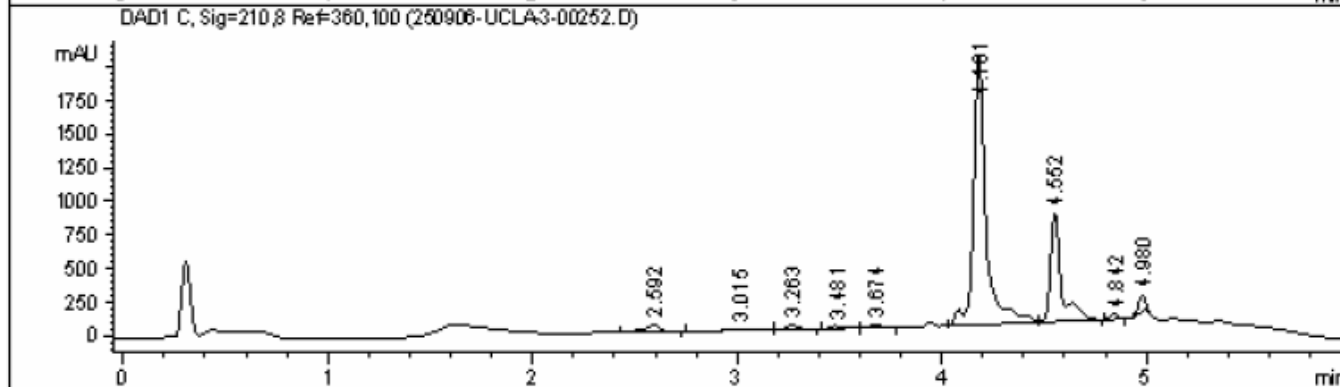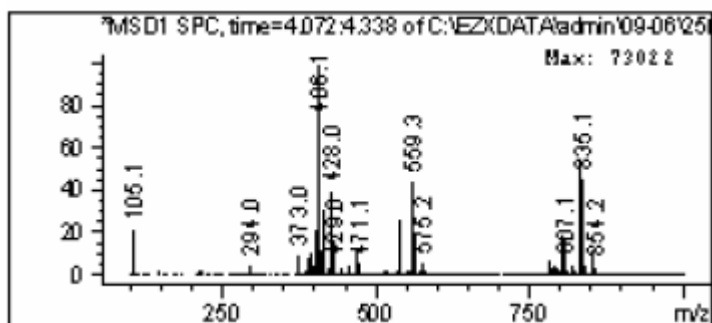

5-Ethyl-2-(*p*-tolyl)-1-(*o*-tolylsulfonyl)-2,5-dihydro-1H-pyrrole-3-carboxylic acid (A05C41)

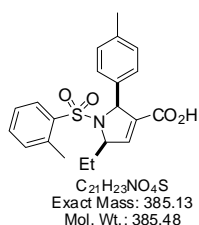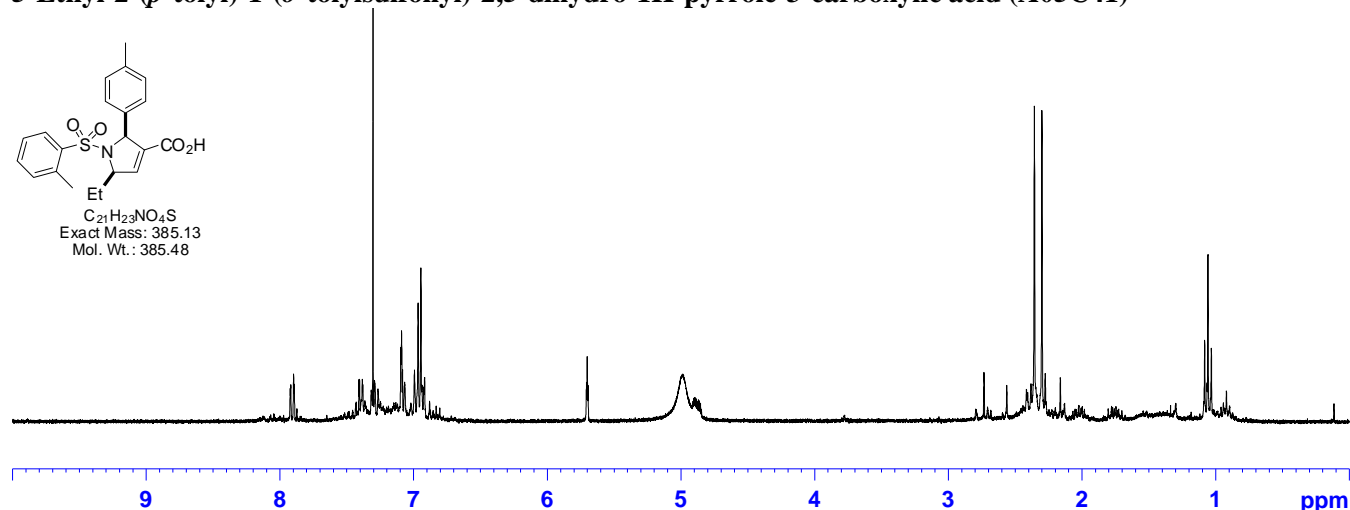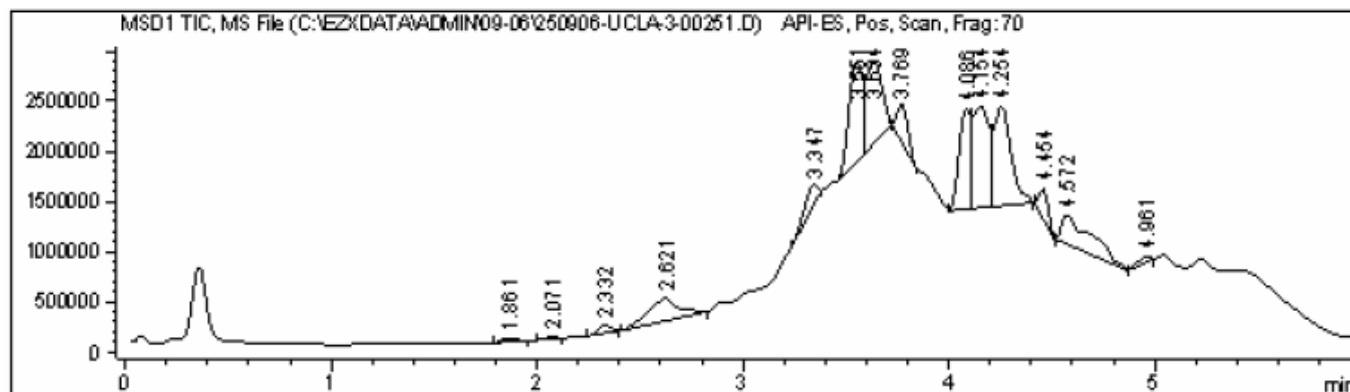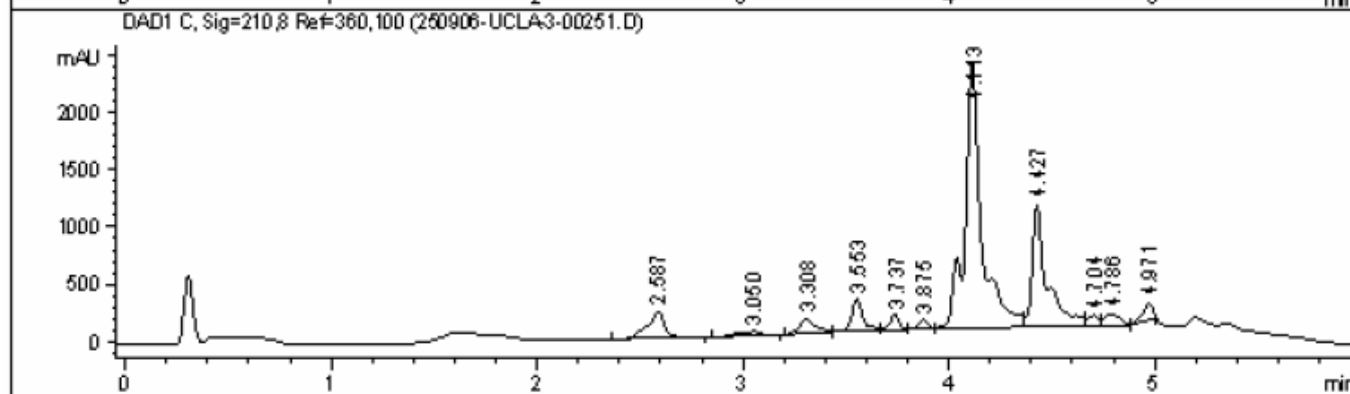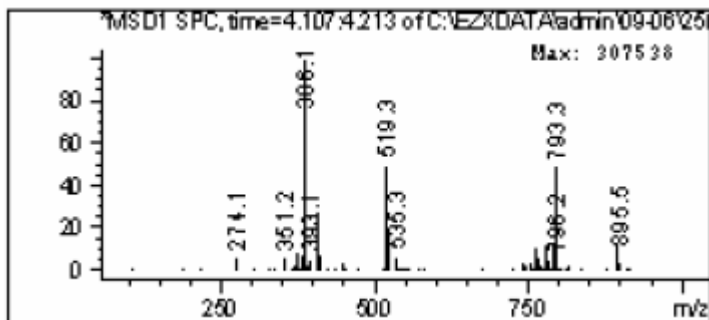

**5-Ethyl-1-(2-(methoxycarbonyl)phenylsulfonyl)-2-(*p*-tolyl)-2,5-dihydro-1H-pyrrole-3-carboxylic acid (A05C42)**

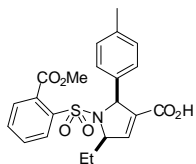

Chemical Formula: C<sub>22</sub>H<sub>23</sub>NO<sub>6</sub>S

Exact Mass: 429.12

Molecular Weight: 429.49

Not included

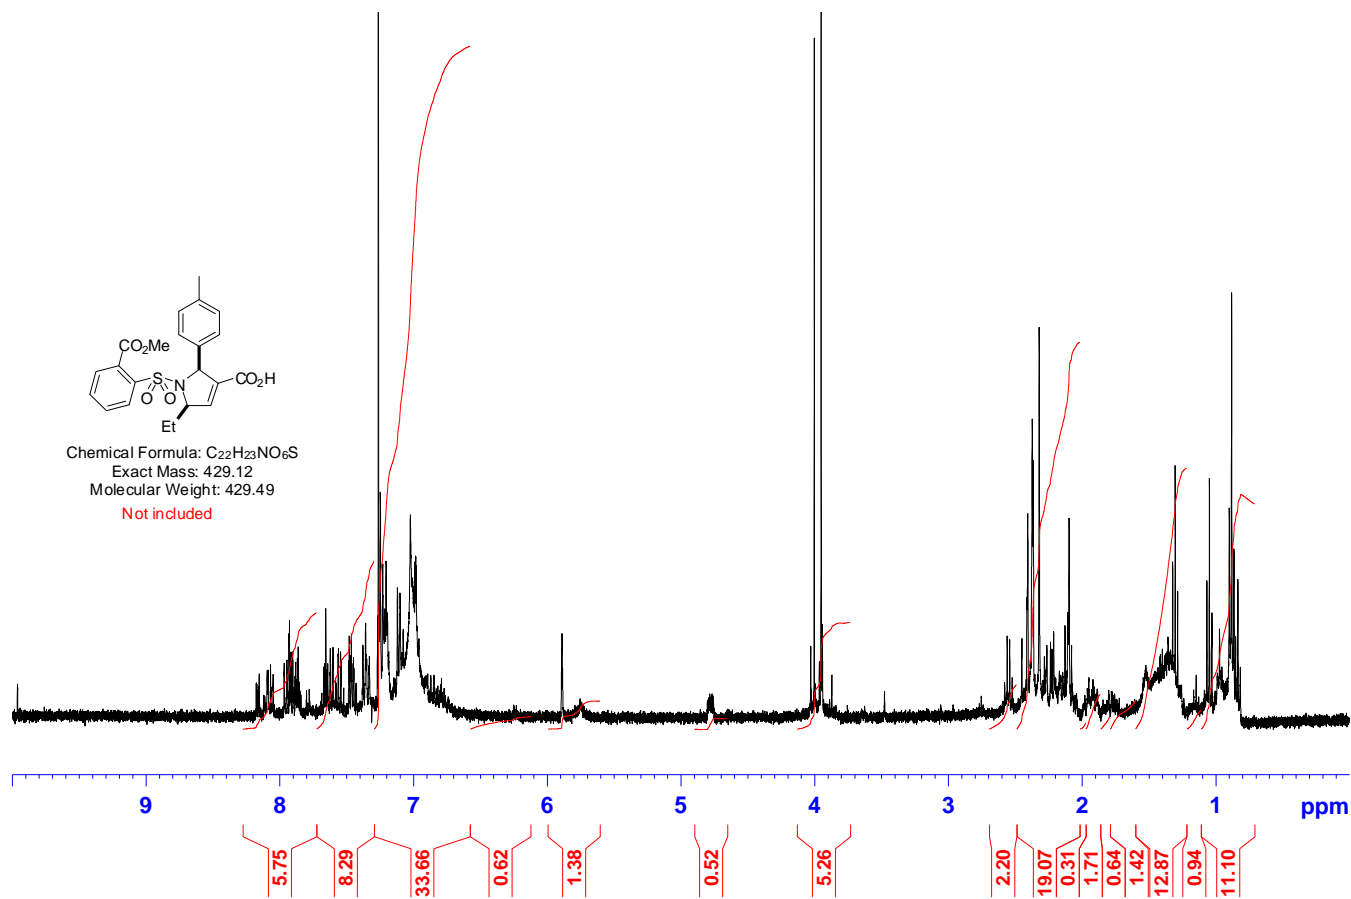

5-Ethyl-1-(phenylsulfonyl)-2-(*p*-tolyl)-2,5-dihydro-1H-pyrrole-3-carboxylic acid (A05C43)

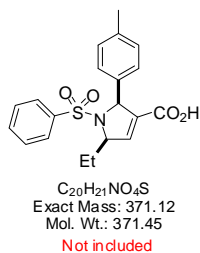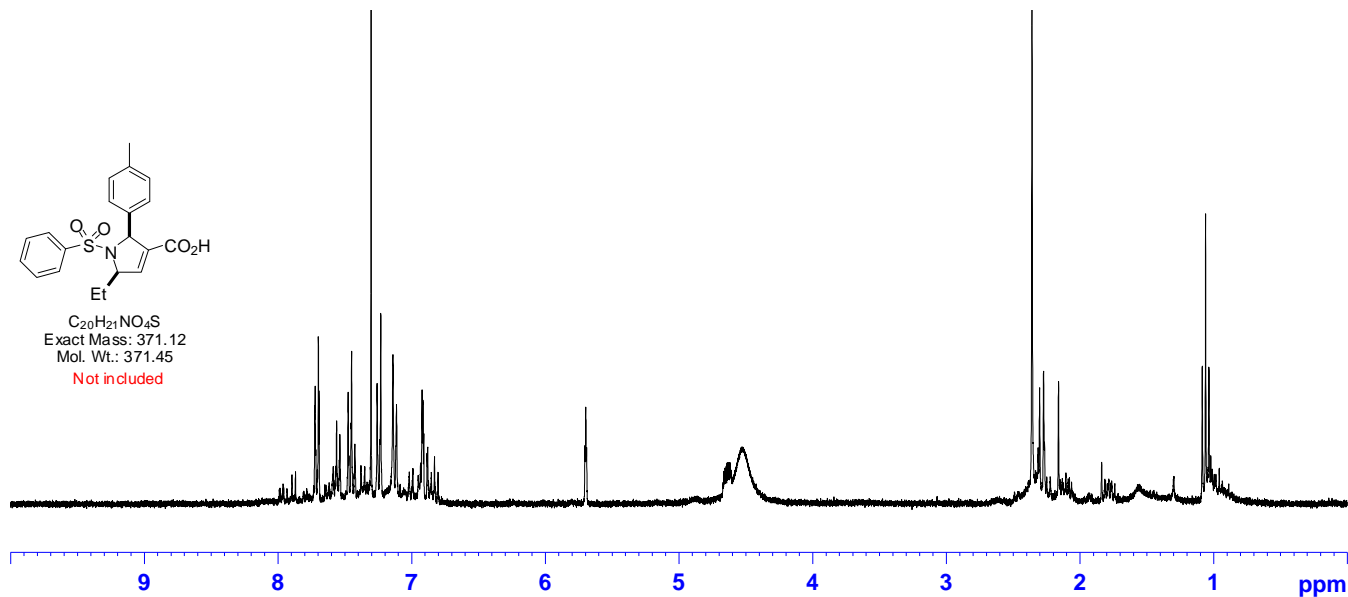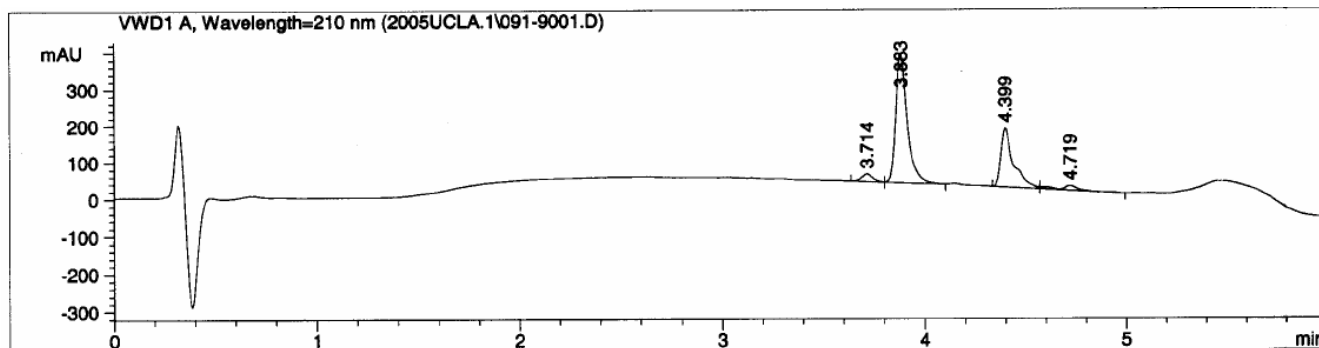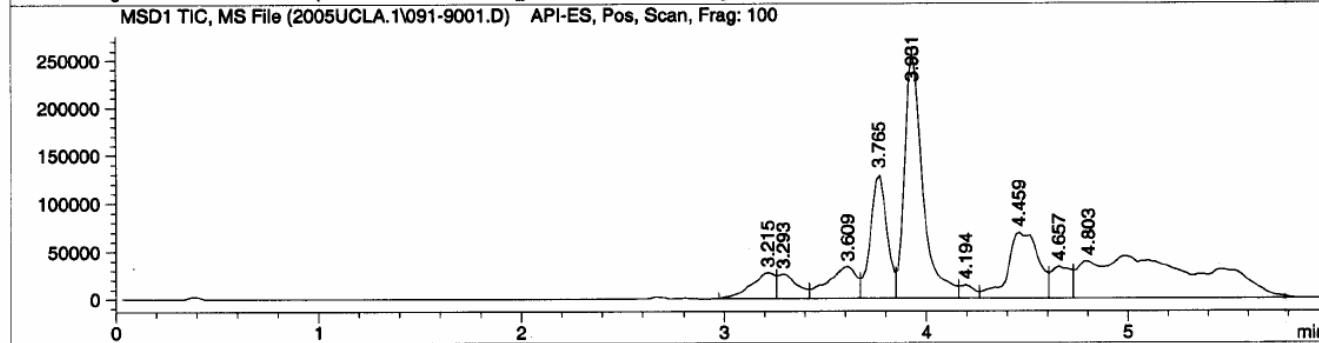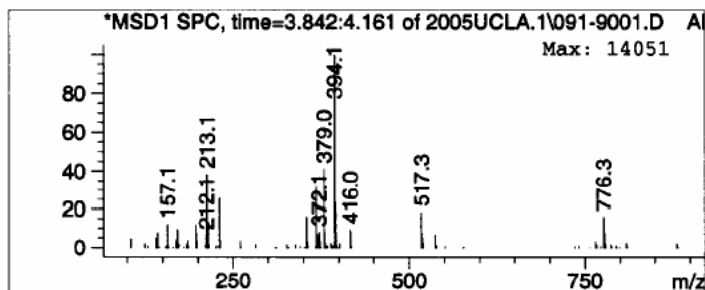



5-Ethyl-1-(4-nitrophenylsulfonyl)-2-(*p*-tolyl)-2,5-dihydro-1H-pyrrole-3-carboxylic acid (A05C44)

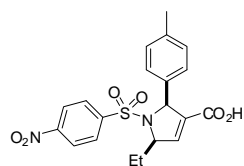

Chemical Formula: C<sub>20</sub>H<sub>20</sub>N<sub>2</sub>O<sub>6</sub>S  
Exact Mass: 416.10  
Molecular Weight: 416.45  
Not included

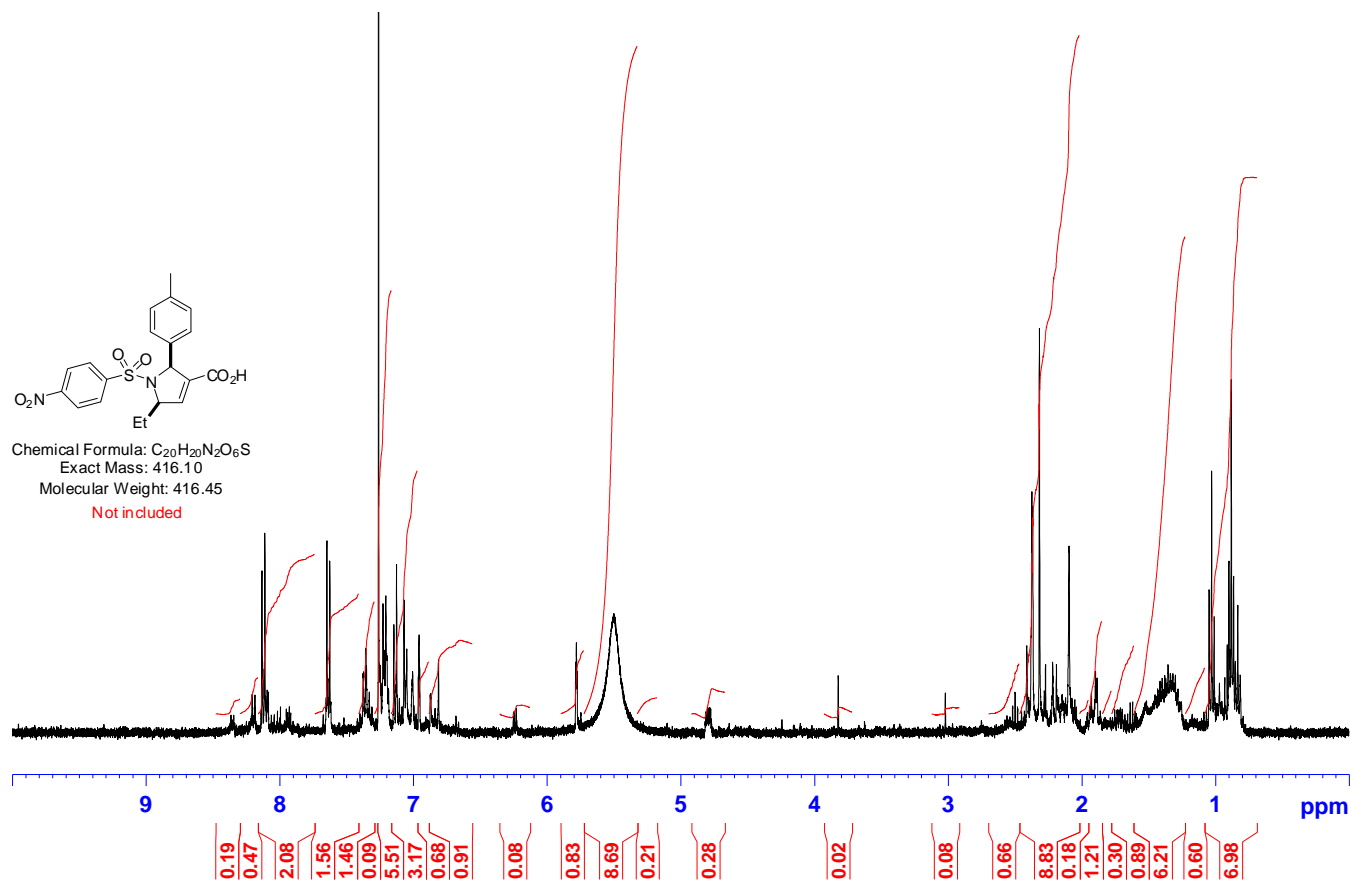

# 5-Ethyl-1-(methylsulfonyl)-2-(p-tolyl)-2,5-dihydro-1H-pyrrole-3-carboxylic acid (A05C46)

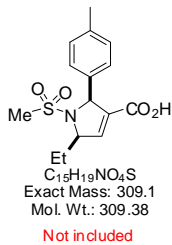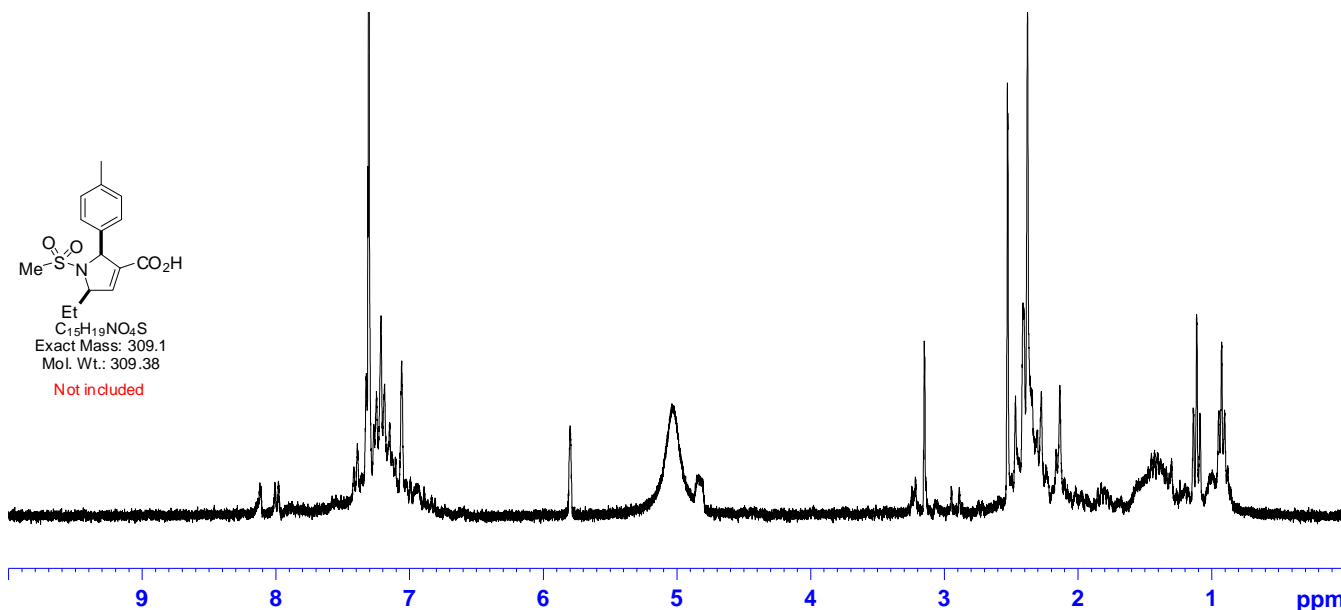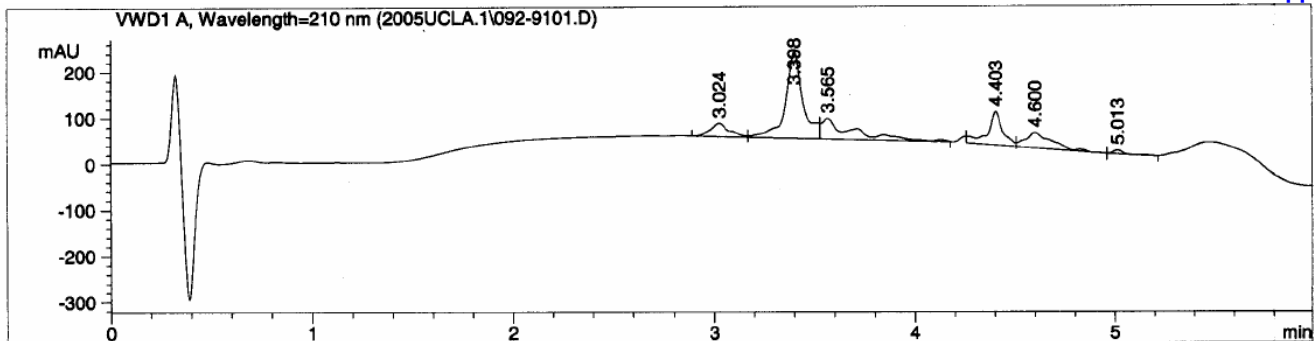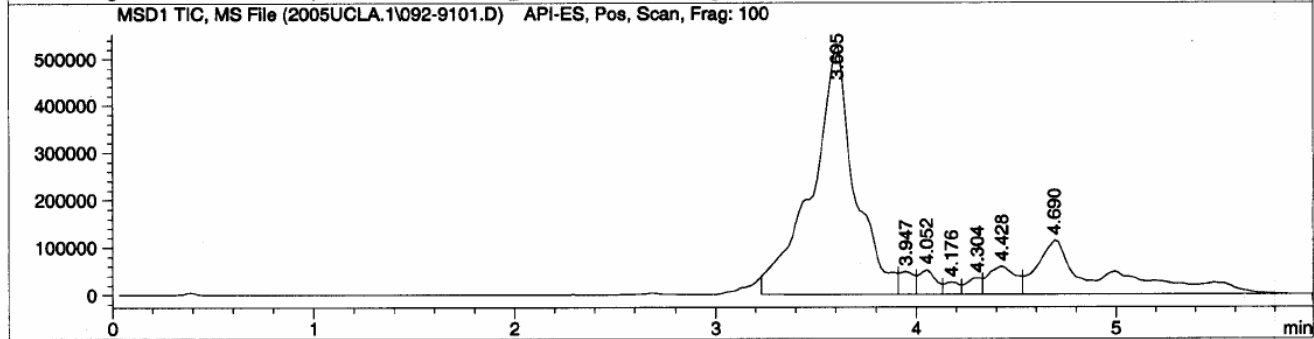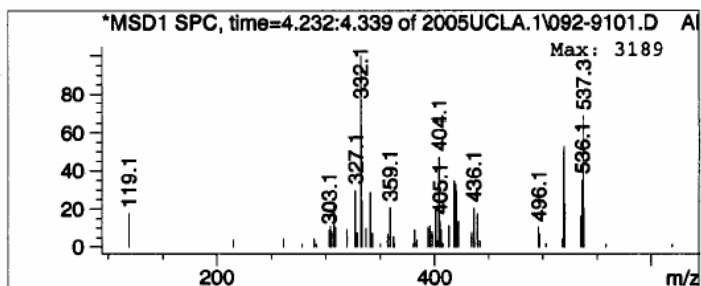

## Spectral Data for Table 9

### 5-Methyl-4-(phenylthio)-2-(*p*-tolyl)-1-tosylpyrrolidine-3-carboxylic acid (A02C02E01)

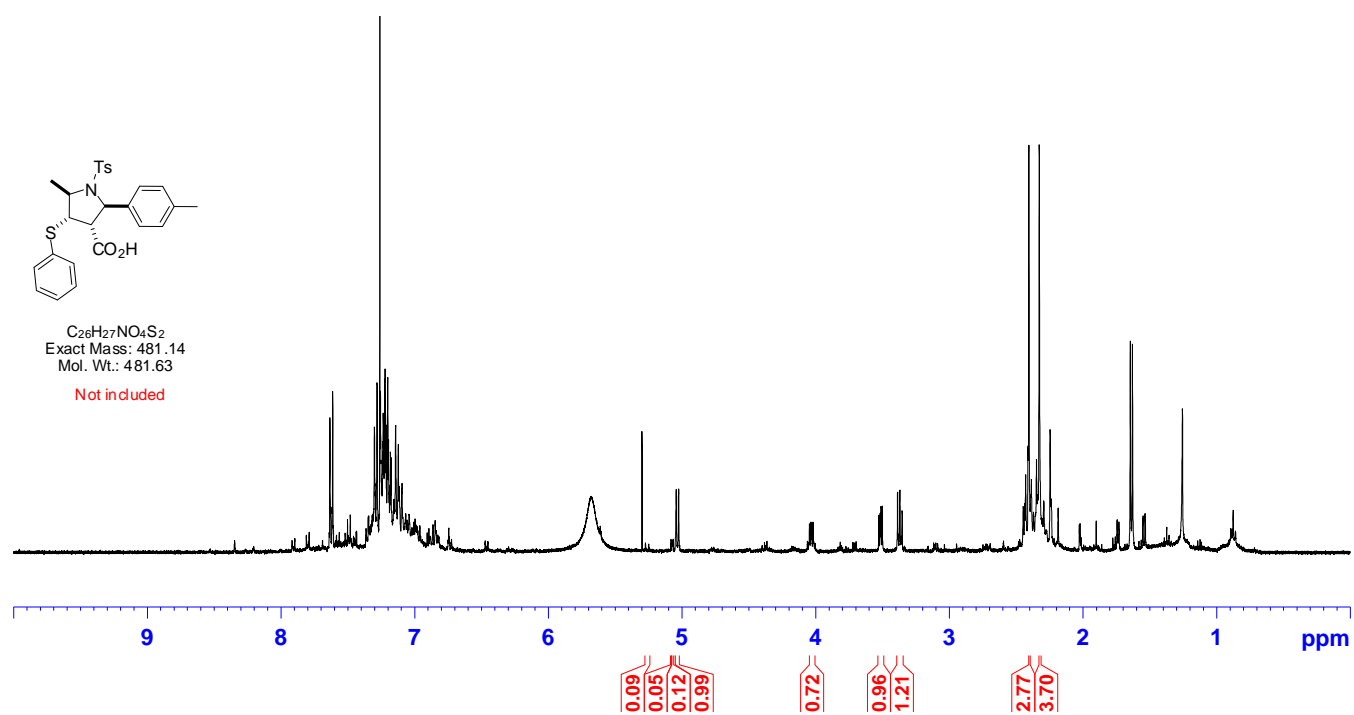

5-Phenyl-4-(phenylthio)-2-(p-tolyl)-1-tosylpyrrolidine-3-carboxylic acid (A04C02E01)

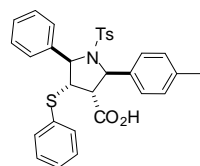

C<sub>31</sub>H<sub>29</sub>NO<sub>4</sub>S<sub>2</sub>  
Exact Mass: 543.15  
Mol. Wt.: 543.7

Not included

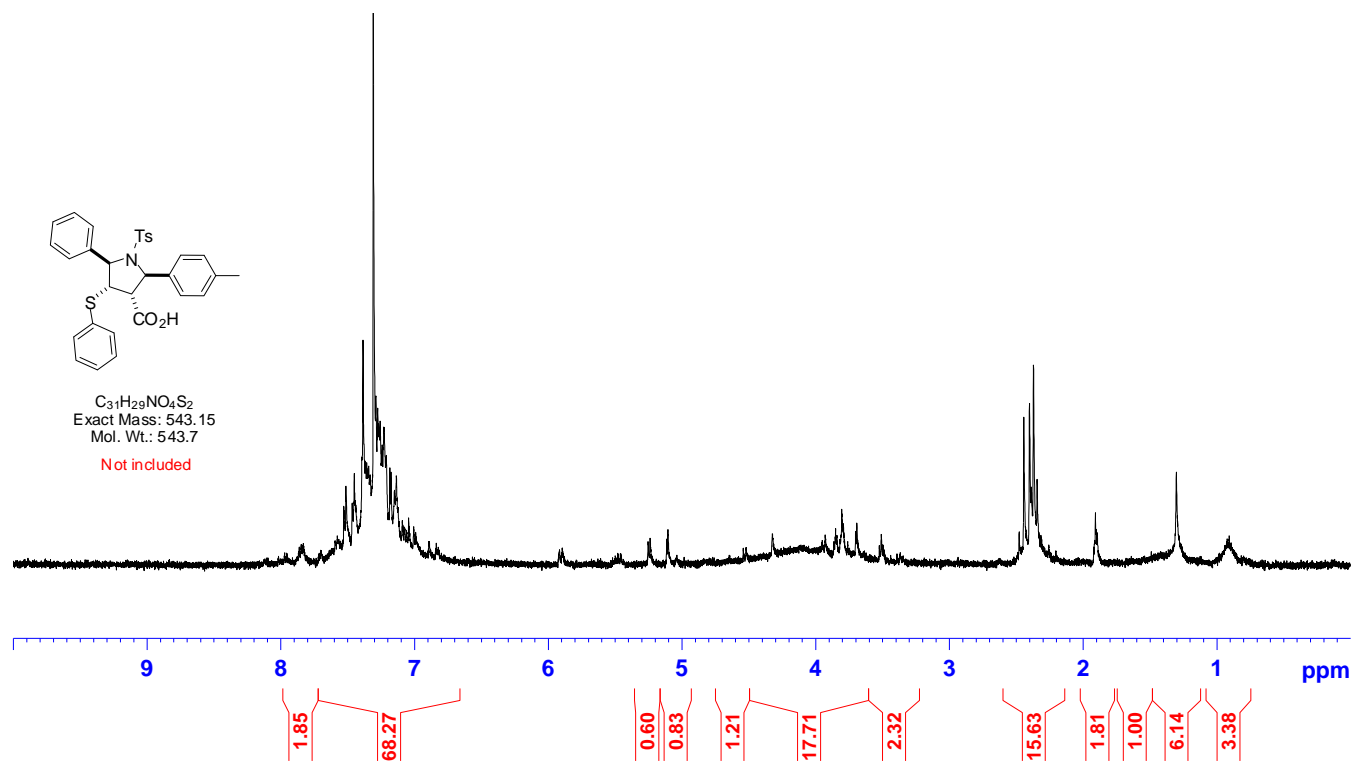

5-Ethyl-2-(*p*-tolyl)-4-(*p*-tolylthio)-1-tosylpyrrolidine-3-carboxylic acid (A05C02E02)

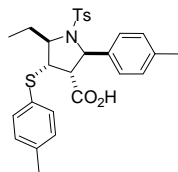

C<sub>28</sub>H<sub>31</sub>NO<sub>4</sub>S<sub>2</sub>  
 Exact Mass: 509.17  
 Mol. Wt.: 509.68

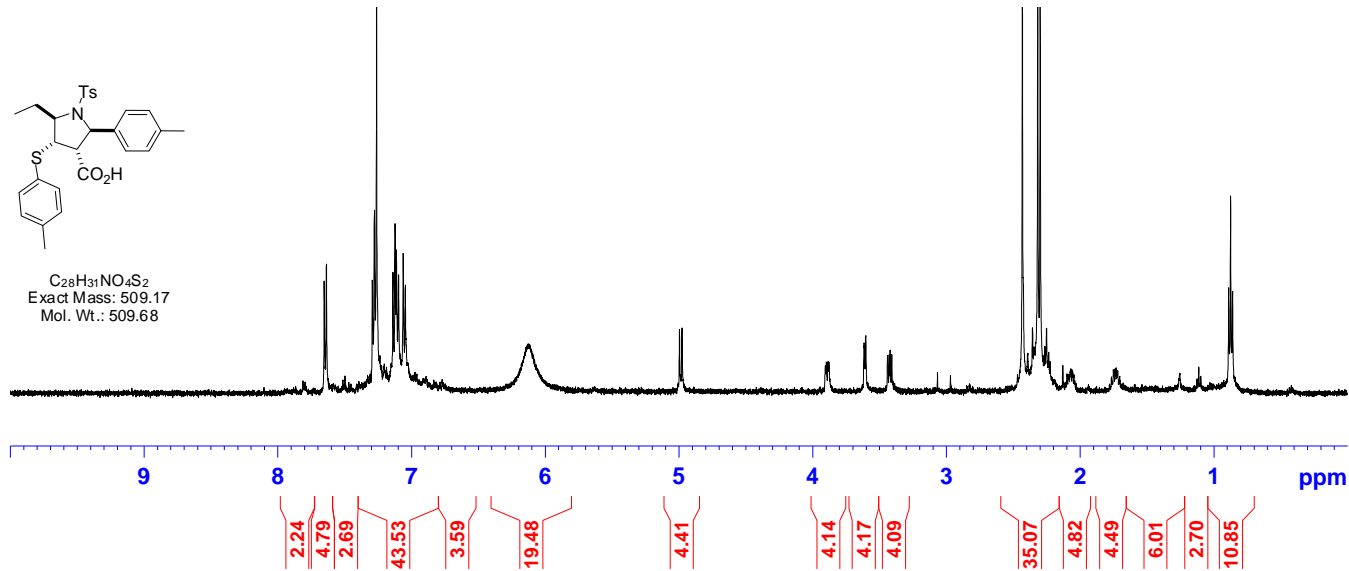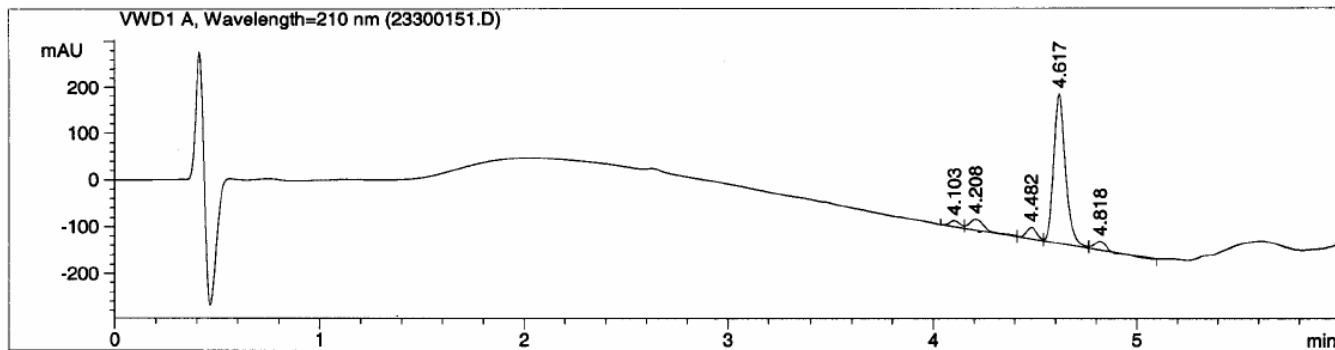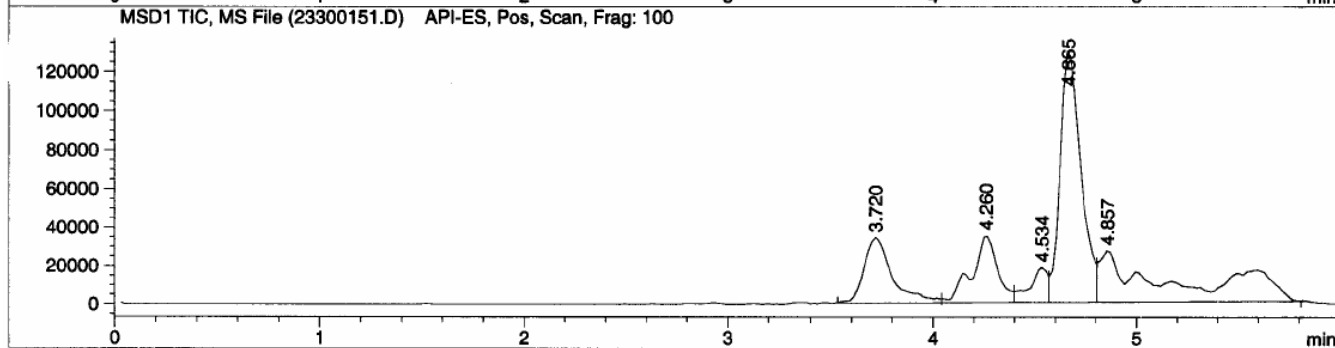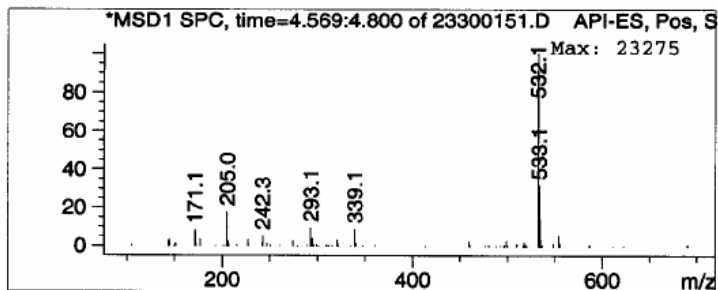

**5-Isopropyl-2-(*p*-tolyl)-4-(*p*-tolylthio)-1-tosylpyrrolidine-3-carboxylic acid (A06C02E02)**

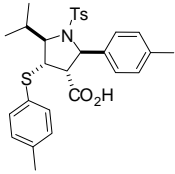

C<sub>29</sub>H<sub>33</sub>NO<sub>4</sub>S<sub>2</sub>  
 Exact Mass: 523.19  
 Mol. Wt.: 523.71

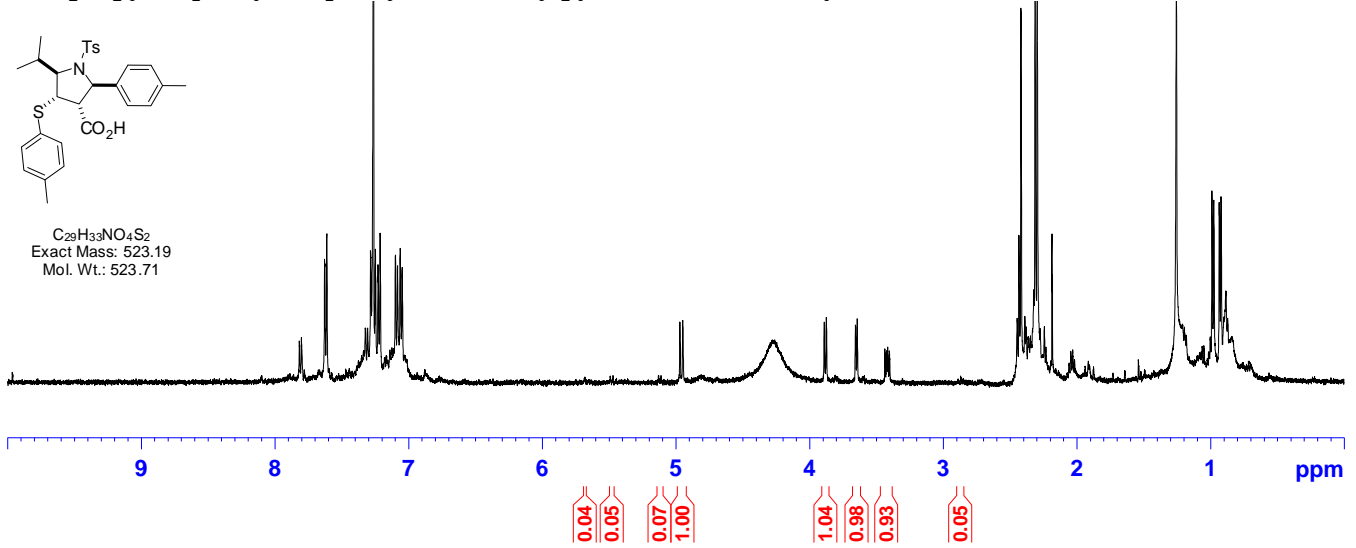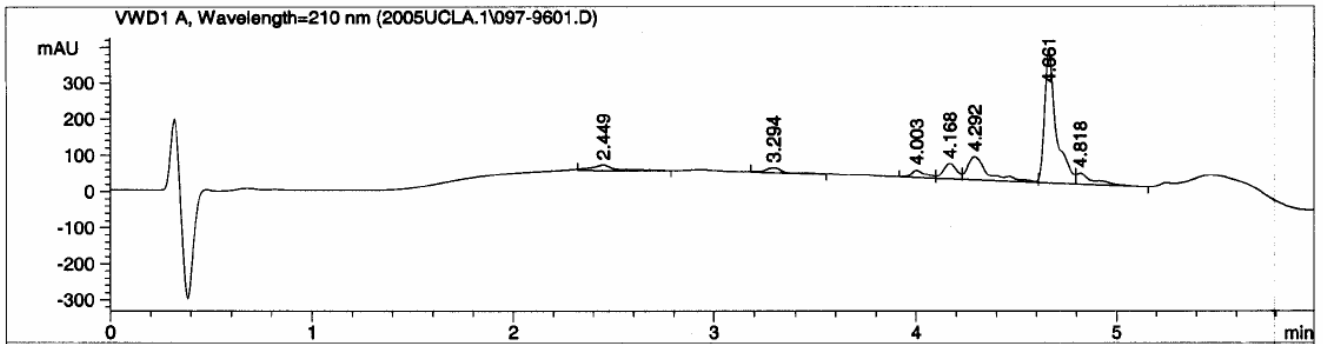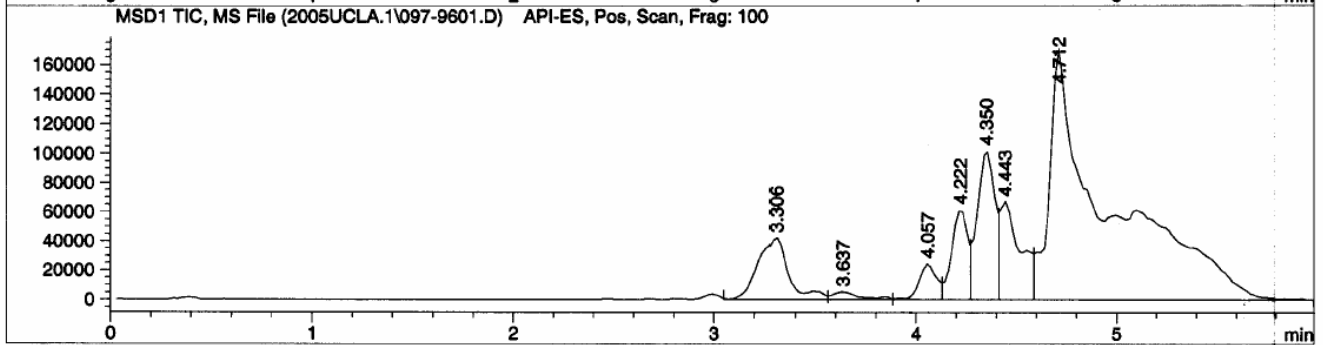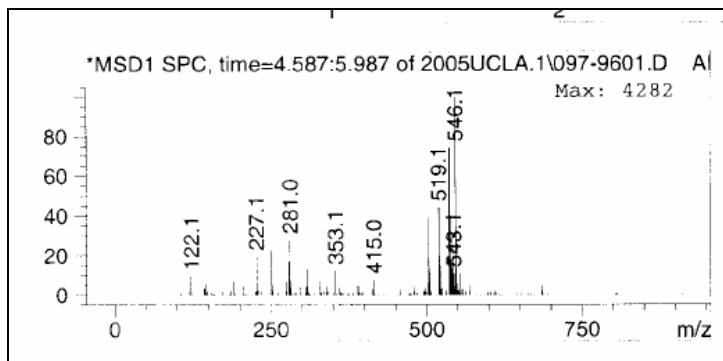

5-Propyl-2-(*p*-tolyl)-4-(*p*-tolylthio)-1-tosylpyrrolidine-3-carboxylic acid (A07C02E02)

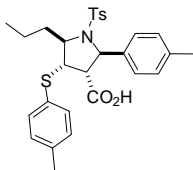

C<sub>29</sub>H<sub>33</sub>NO<sub>4</sub>S<sub>2</sub>  
 Exact Mass: 523.19  
 Mol. Wt.: 523.71

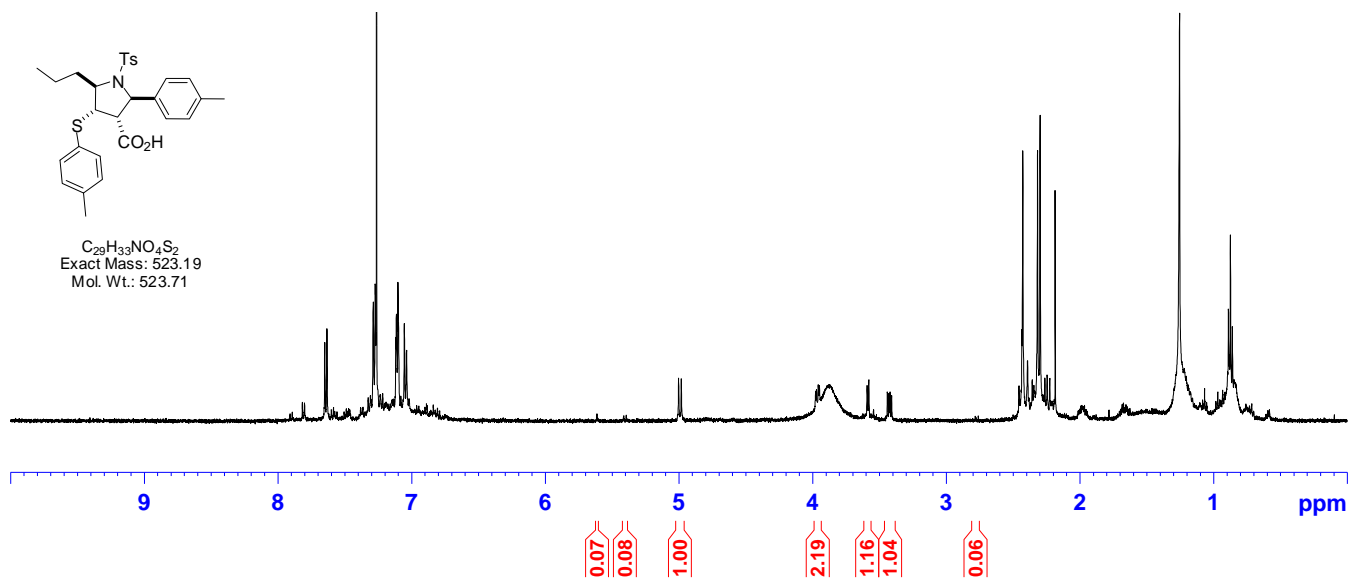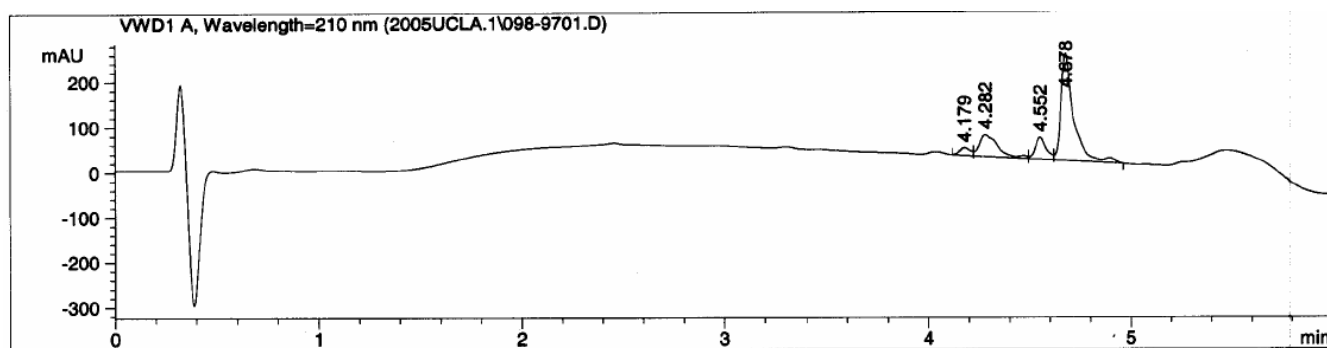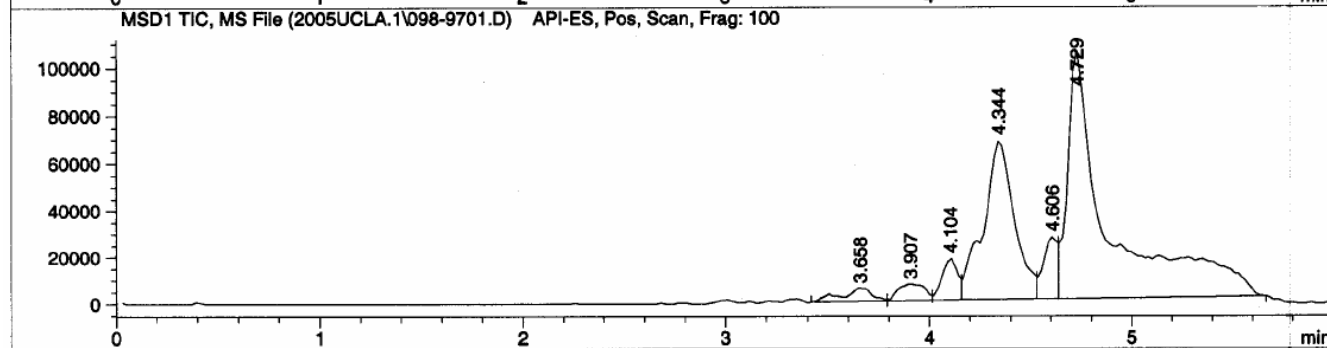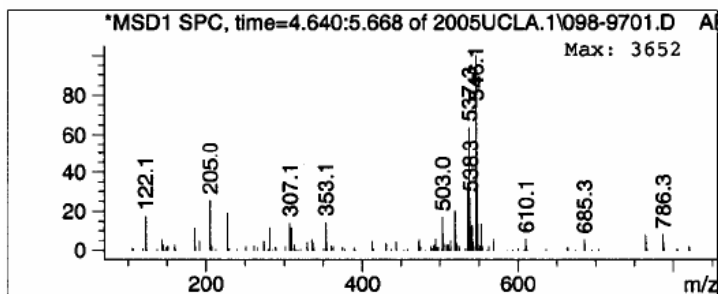

5-Butyl-2-(p-tolyl)-4-(p-tolylthio)-1-tosylpyrrolidine-3-carboxylic acid (A08C02E02)

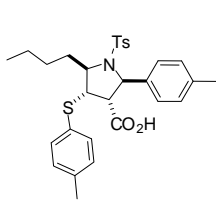

C<sub>30</sub>H<sub>35</sub>NO<sub>4</sub>S<sub>2</sub>  
Exact Mass: 537.2  
Mol. Wt.: 537.73

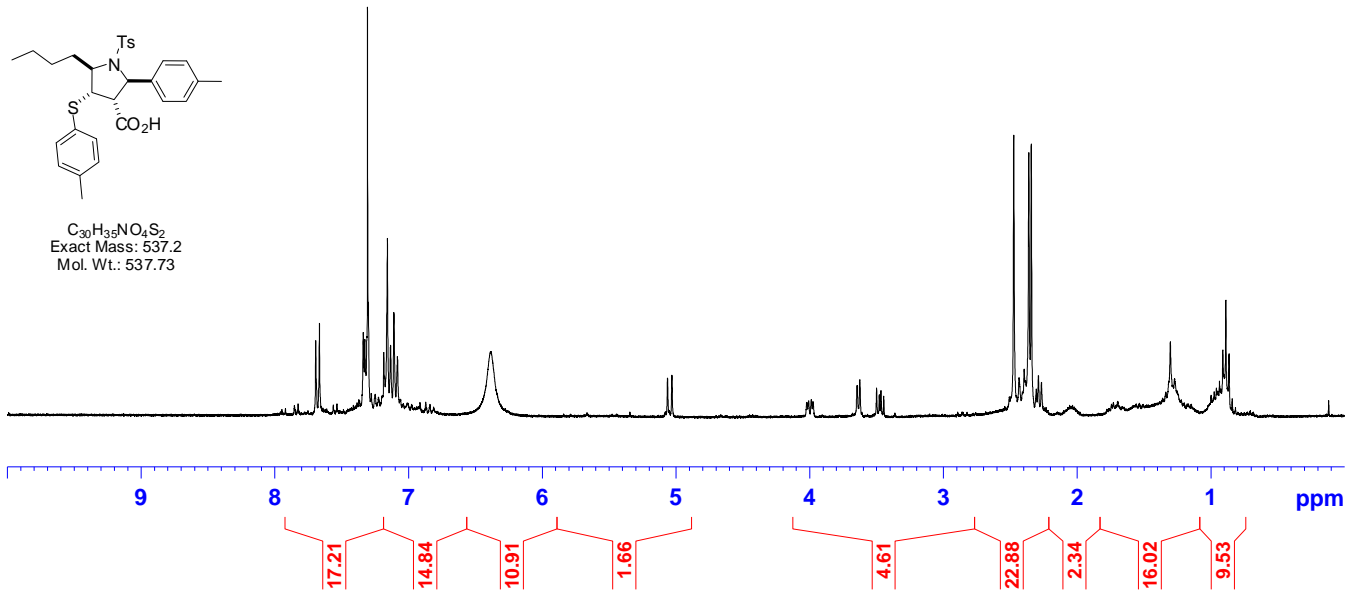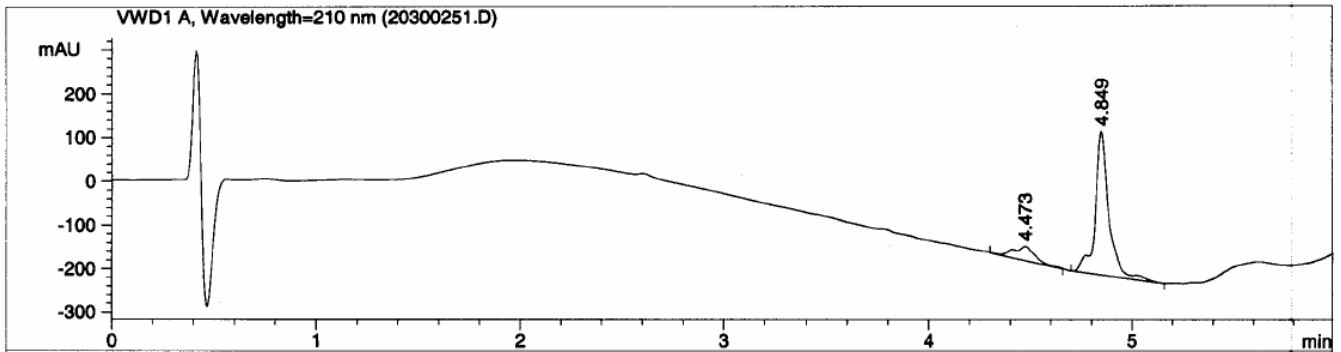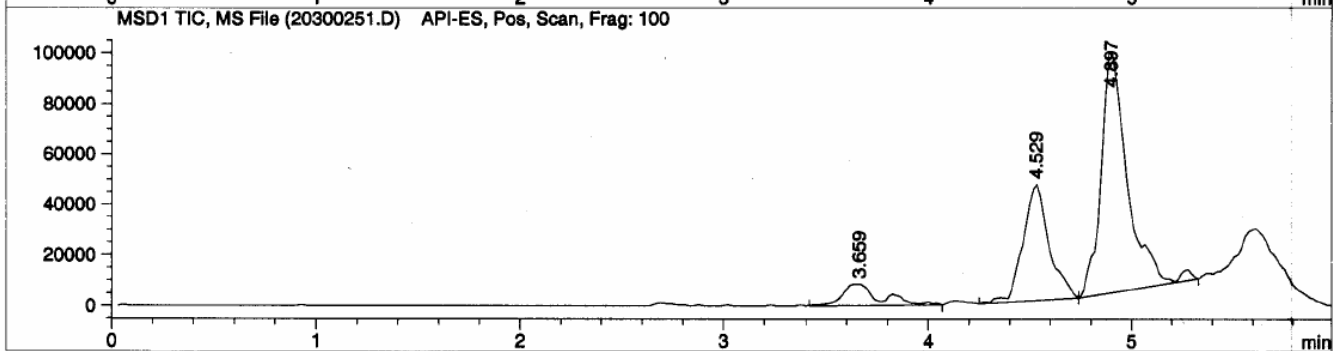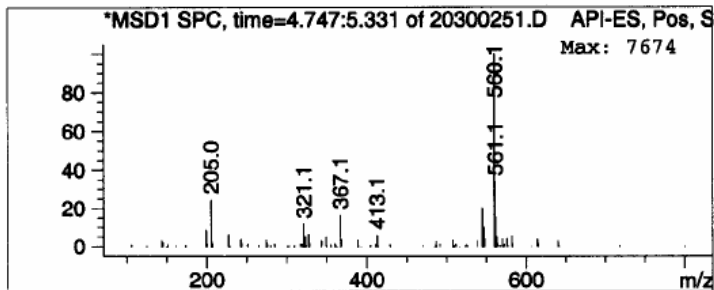



5-Pentyl-2-(*p*-tolyl)-4-(*p*-tolylthio)-1-tosylpyrrolidine-3-carboxylic acid (A09C02E02)

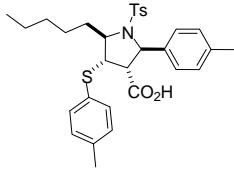

C<sub>31</sub>H<sub>37</sub>NO<sub>4</sub>S<sub>2</sub>  
Exact Mass: 551.22  
Mol. Wt.: 551.76

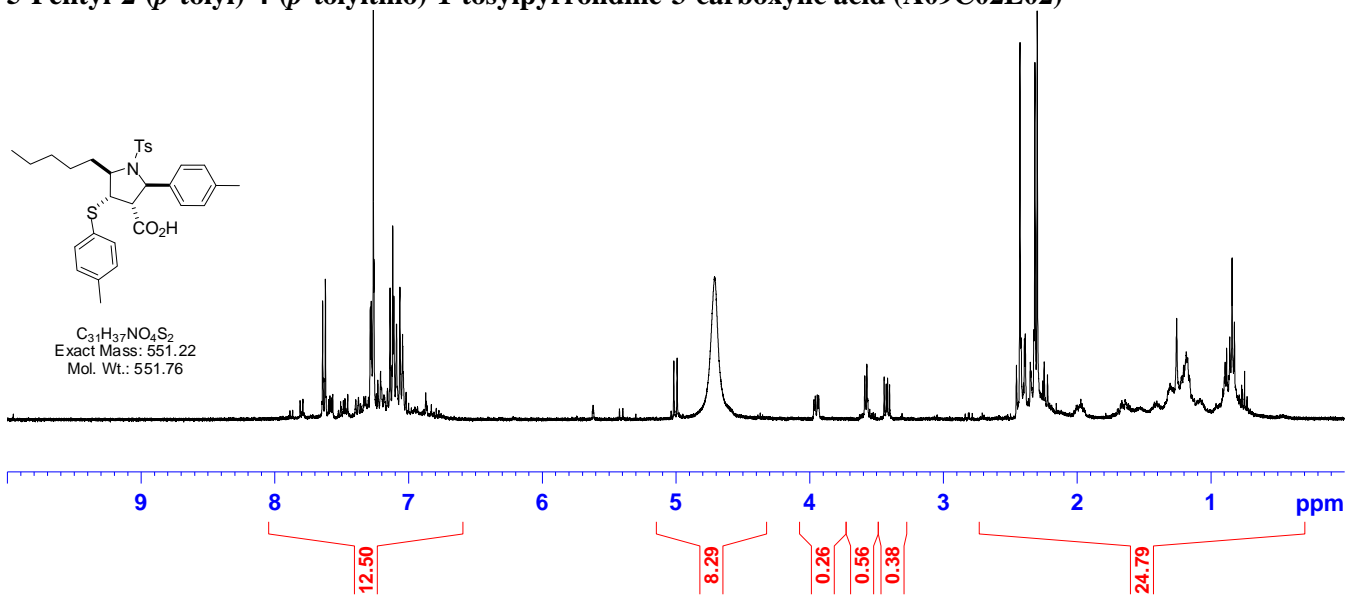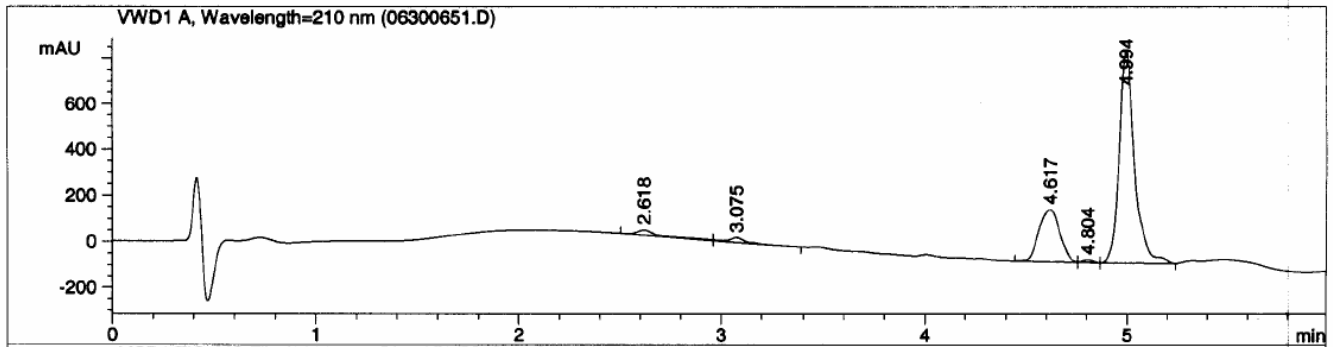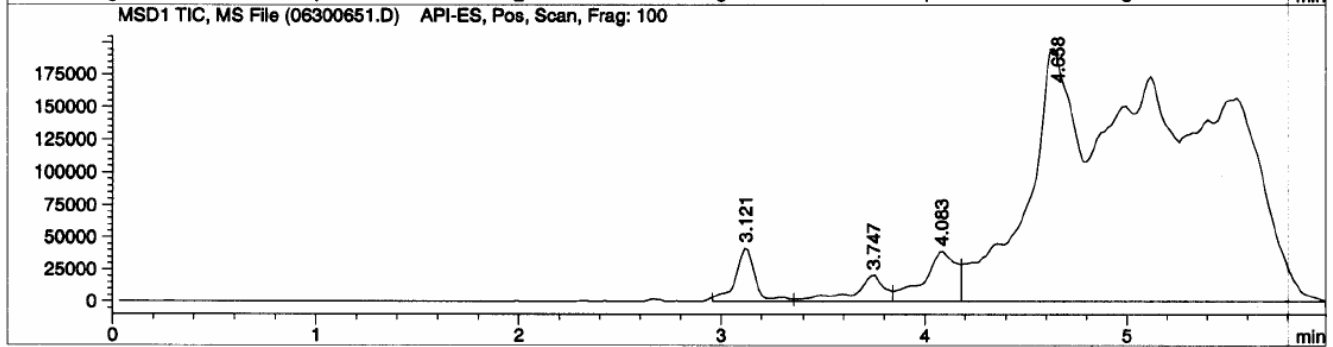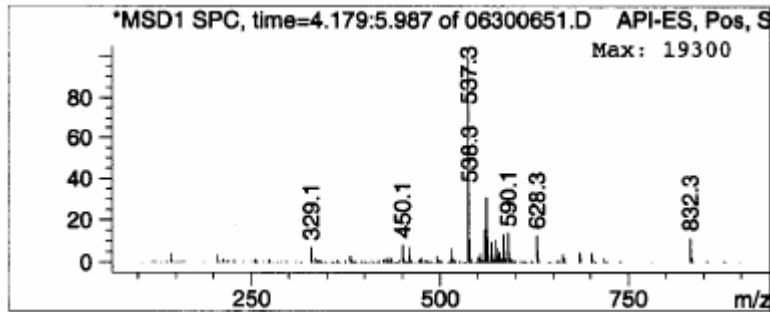

Component 5: Peak at Scan 282.9. Top ions are 574

**5-Hexyl-2-(p-tolyl)-4-(p-tolylthio)-1-tosylpyrrolidine-3-carboxylic acid (A10C02E02)**

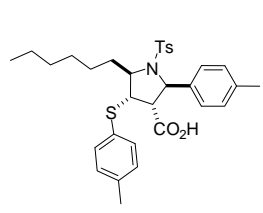

C<sub>32</sub>H<sub>39</sub>NO<sub>4</sub>S<sub>2</sub>  
 Exact Mass: 565.23  
 Mol. Wt.: 565.79

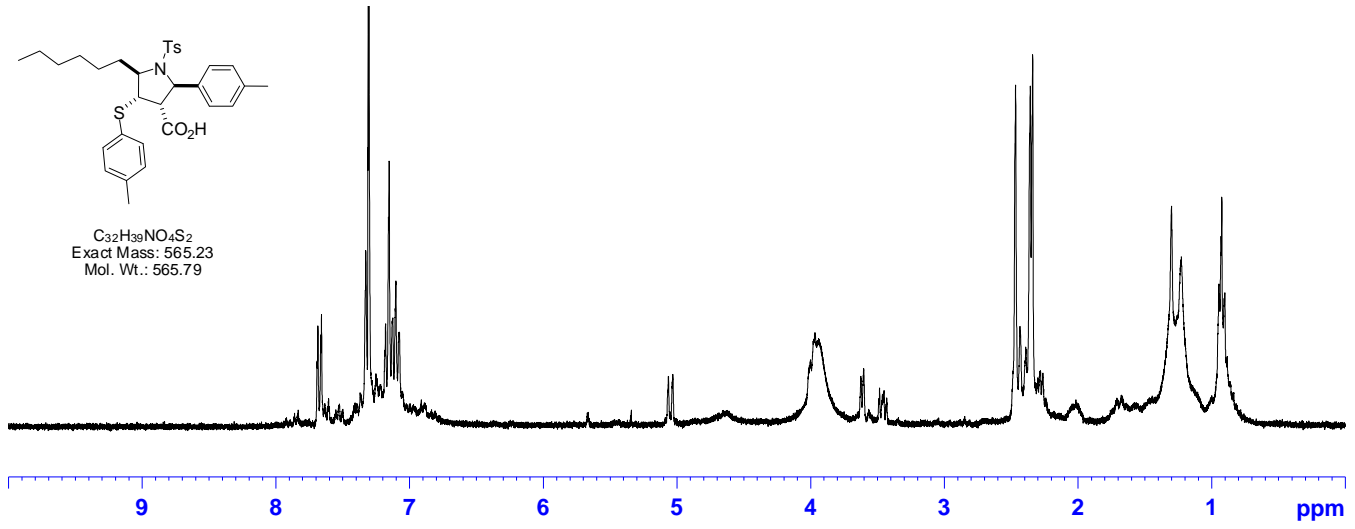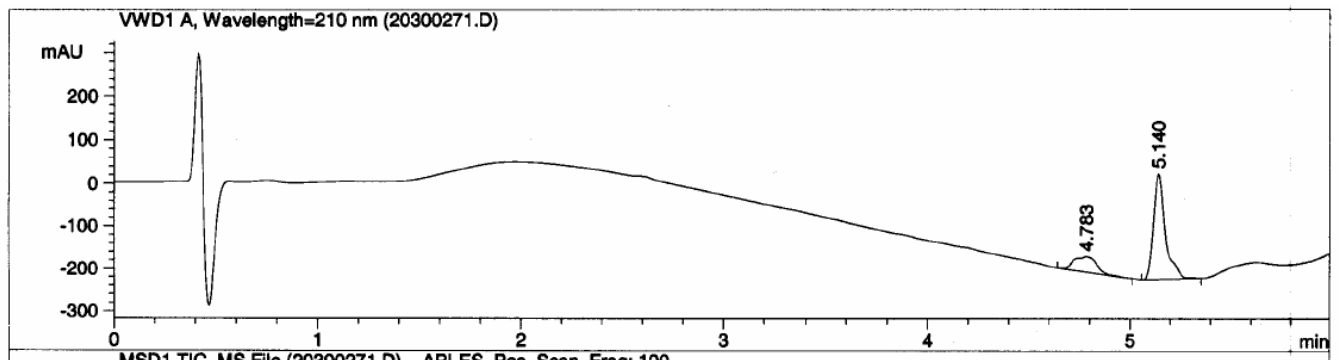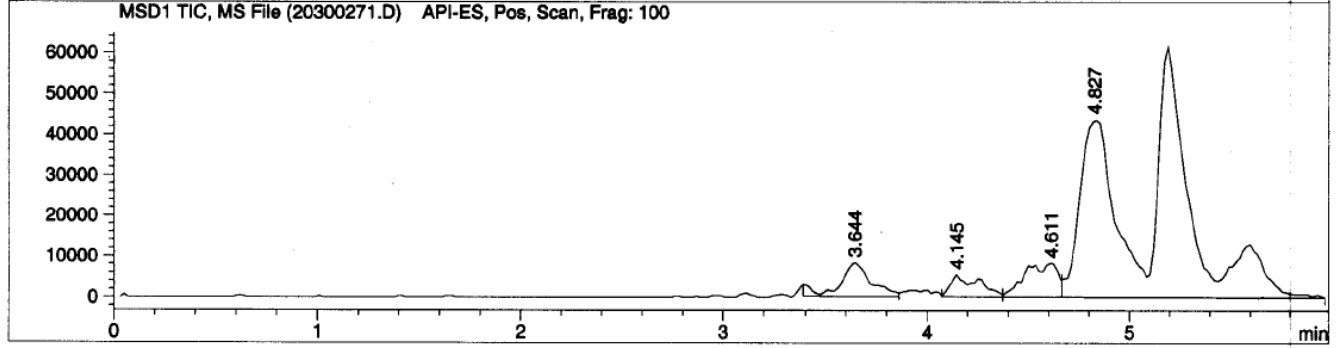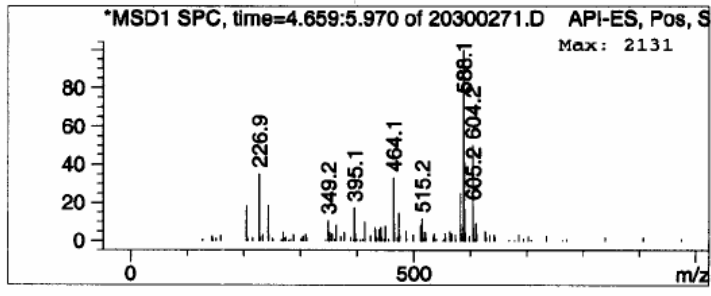

5-(Cyclopentylmethyl)-2-*p*-tolyl-4-(*p*-tolylthio)-1-tosylpyrrolidine-3-carboxylic acid (A11C02E02)

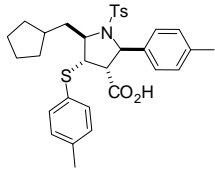

C<sub>32</sub>H<sub>37</sub>NO<sub>4</sub>S<sub>2</sub>  
Exact Mass: 563.22  
Mol. Wt.: 563.77

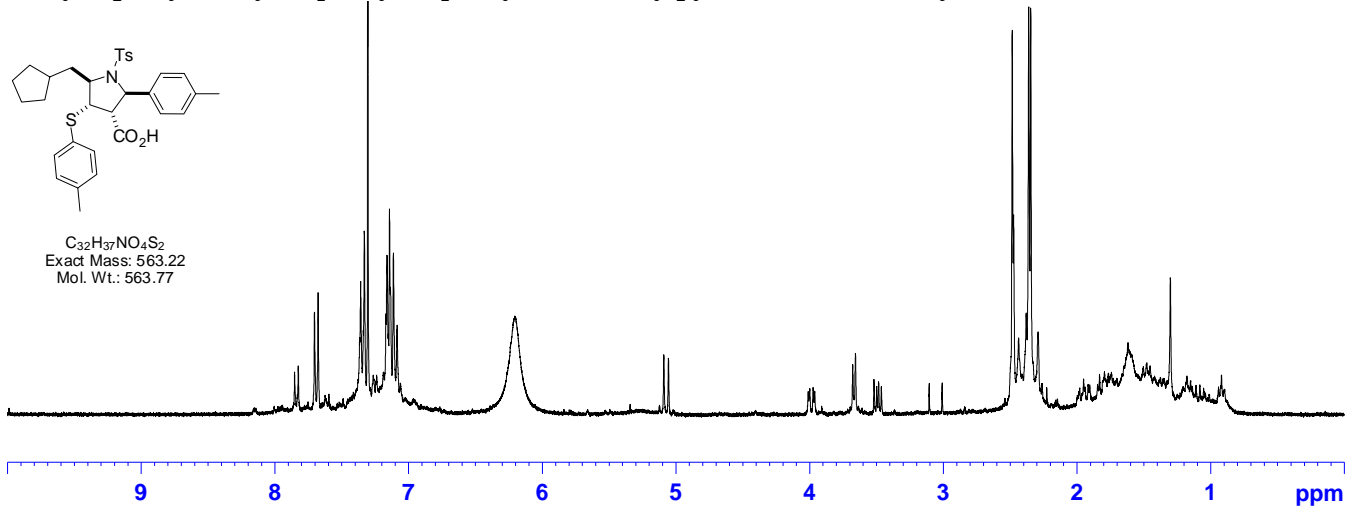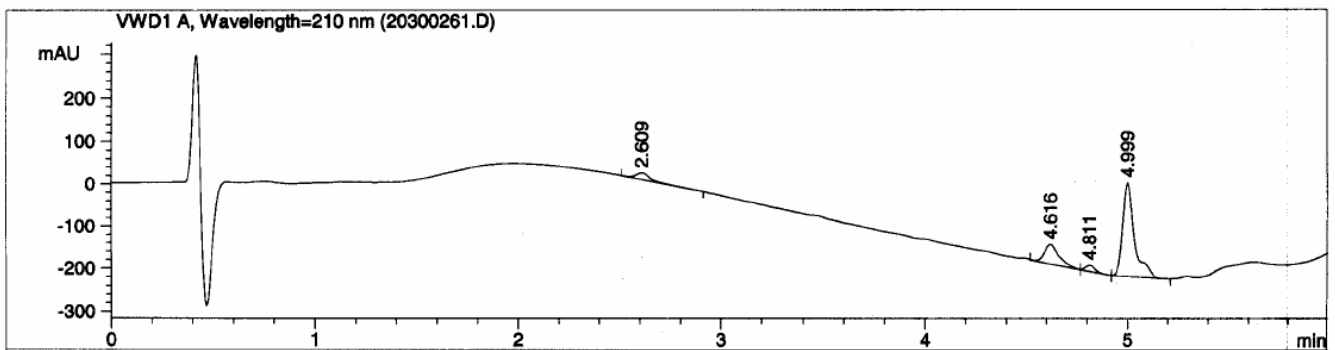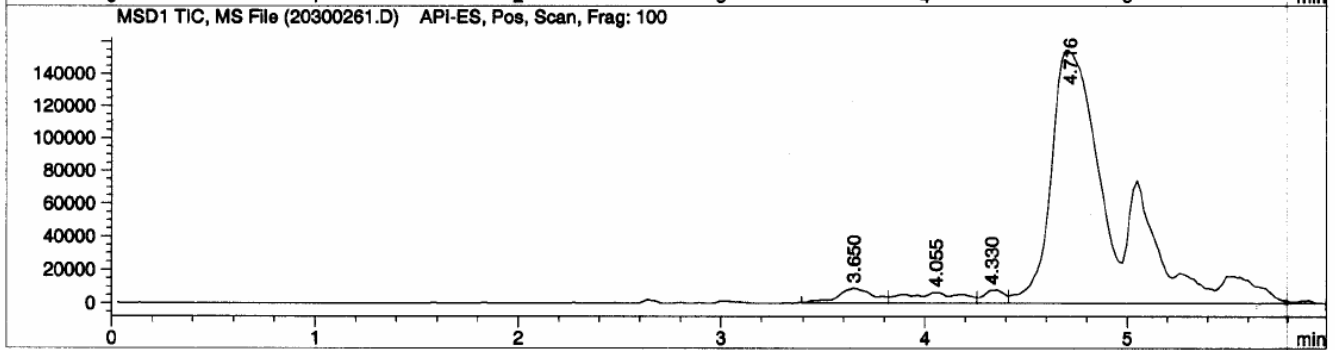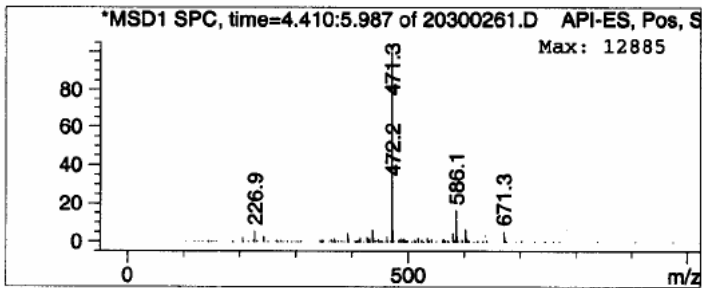

# Spectral Data for Table 10

## 5-Ethyl-2-phenyl-4-(p-tolylthio)-1-tosylpyrrolidine-3-carboxylic acid (A05C01E02)

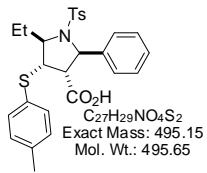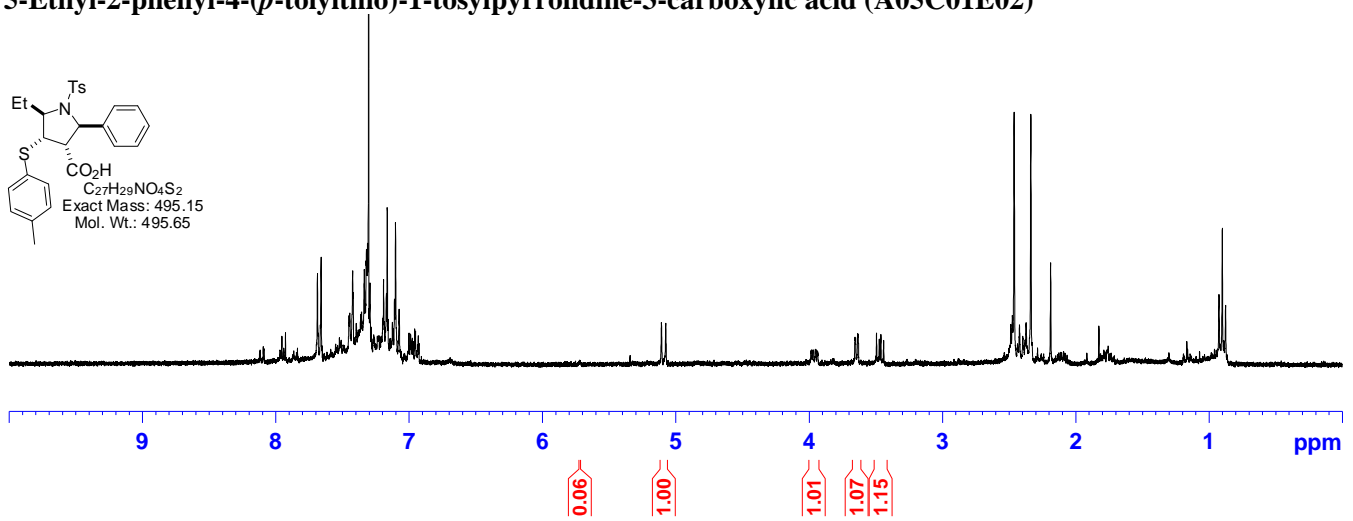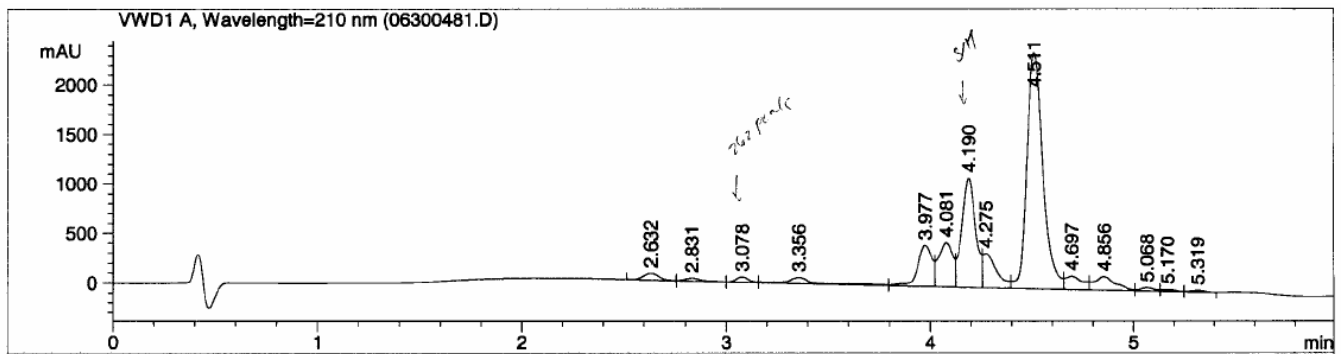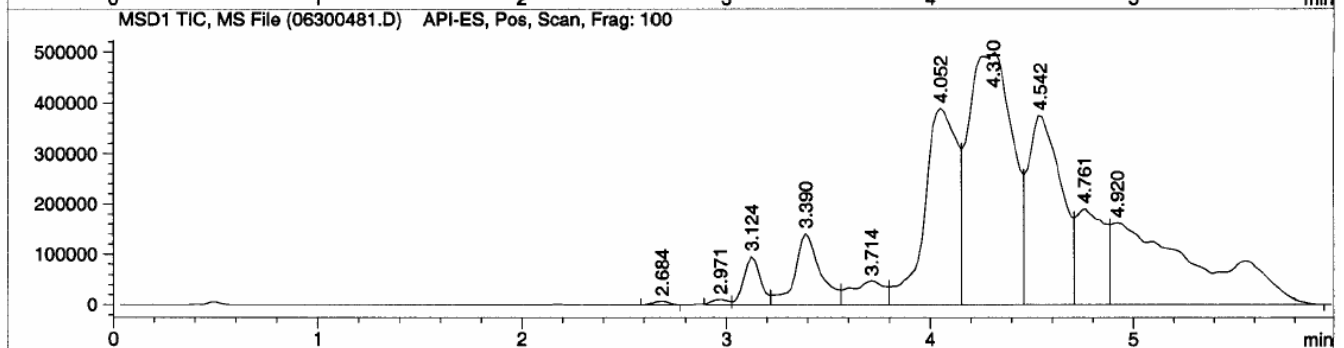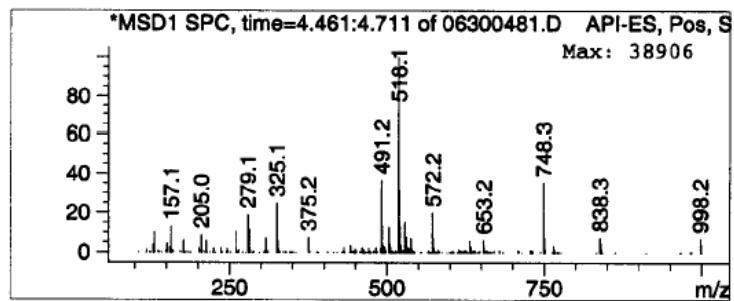

5-Ethyl-2-(p-tolyl)-4-(p-tolylthio)-1-tosylpyrrolidine-3-carboxylic acid (A05C02E02)

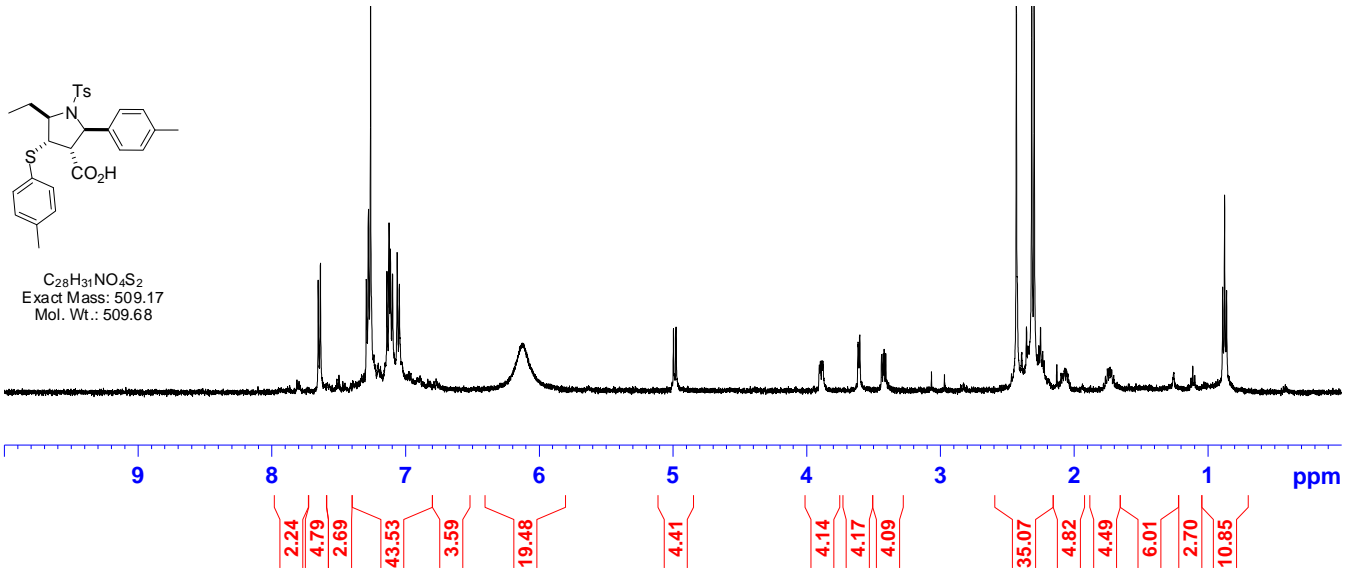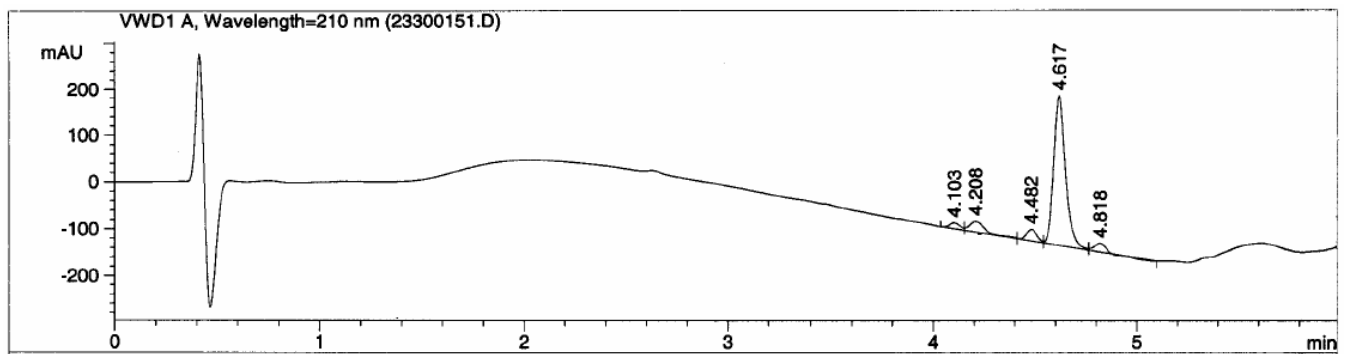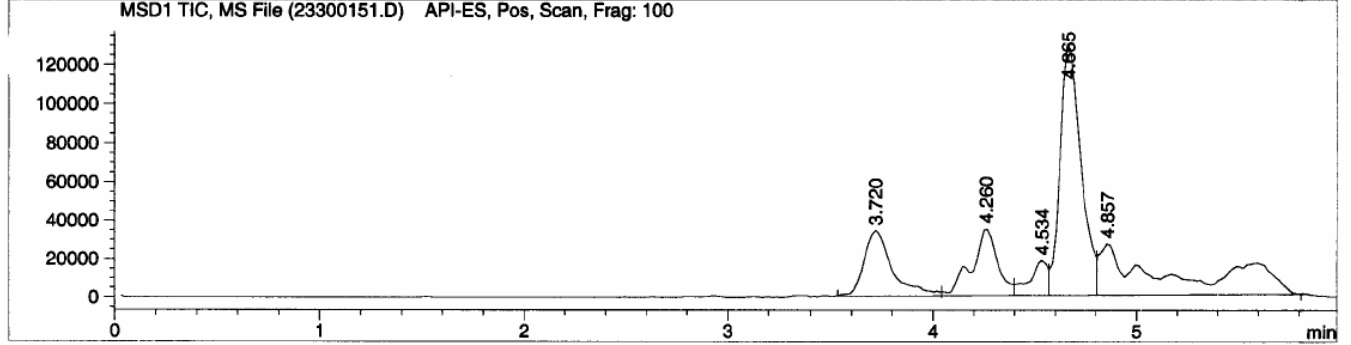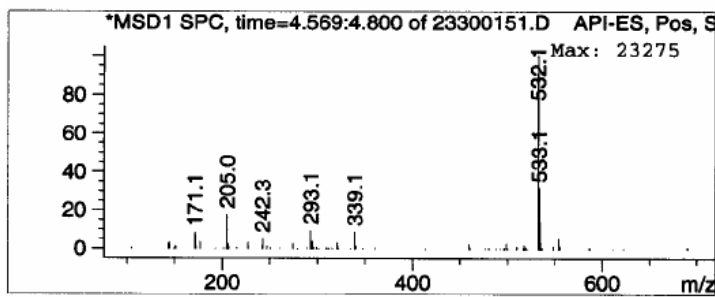

5-Ethyl-2-(4-ethylphenyl)-4-(p-tolylthio)-1-tosylpyrrolidine-3-carboxylic acid (A05C03E02)

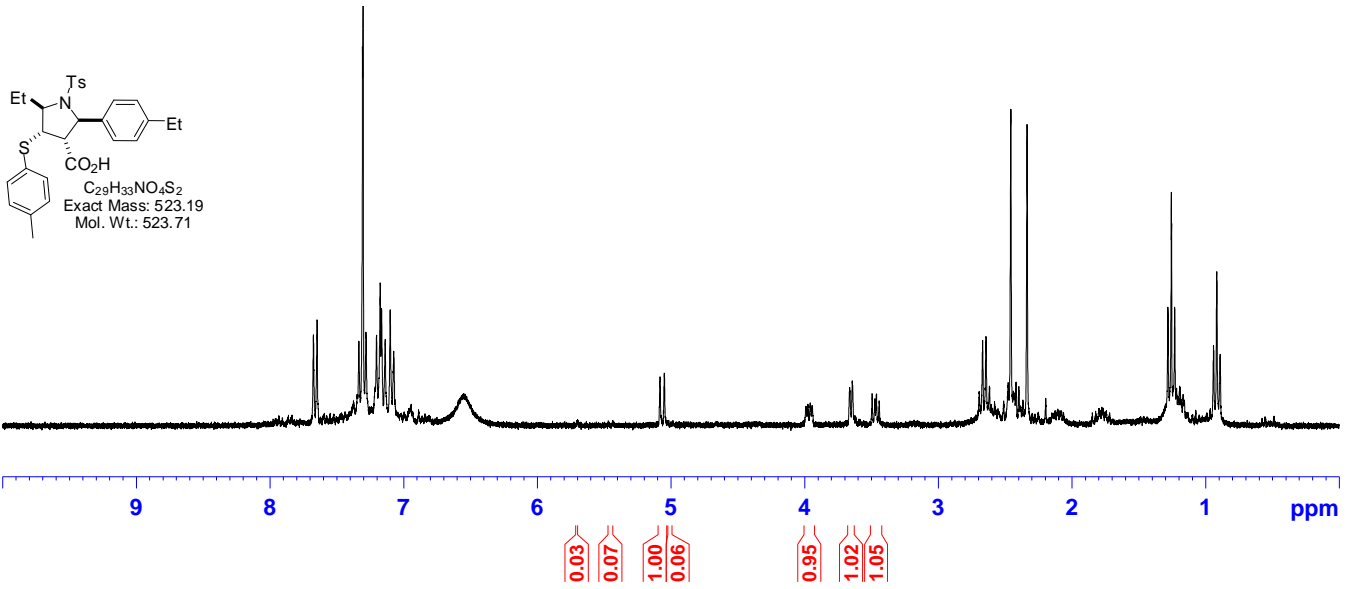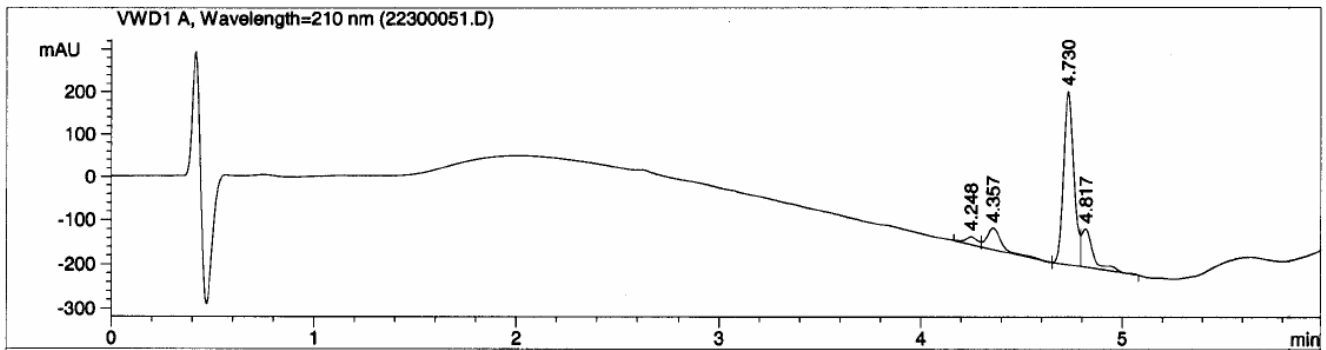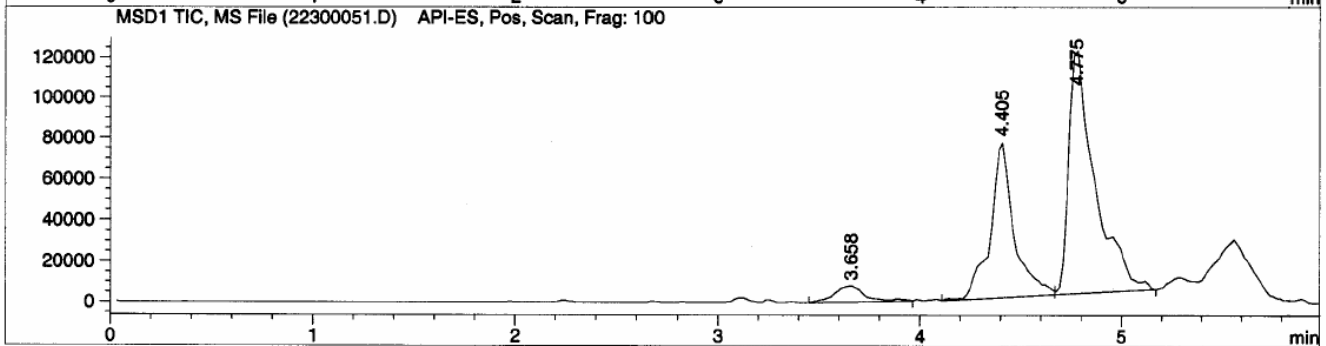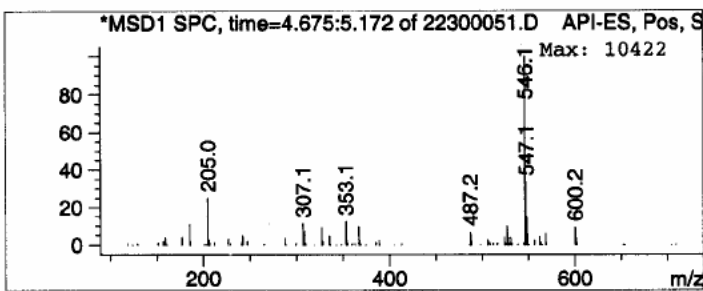

5-Ethyl-2-(4-methoxyphenyl)-4-(*p*-tolylthio)-1-tosylpyrrolidine-3-carboxylic acid (A05C04E02)

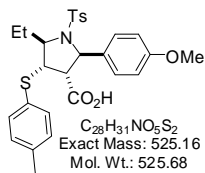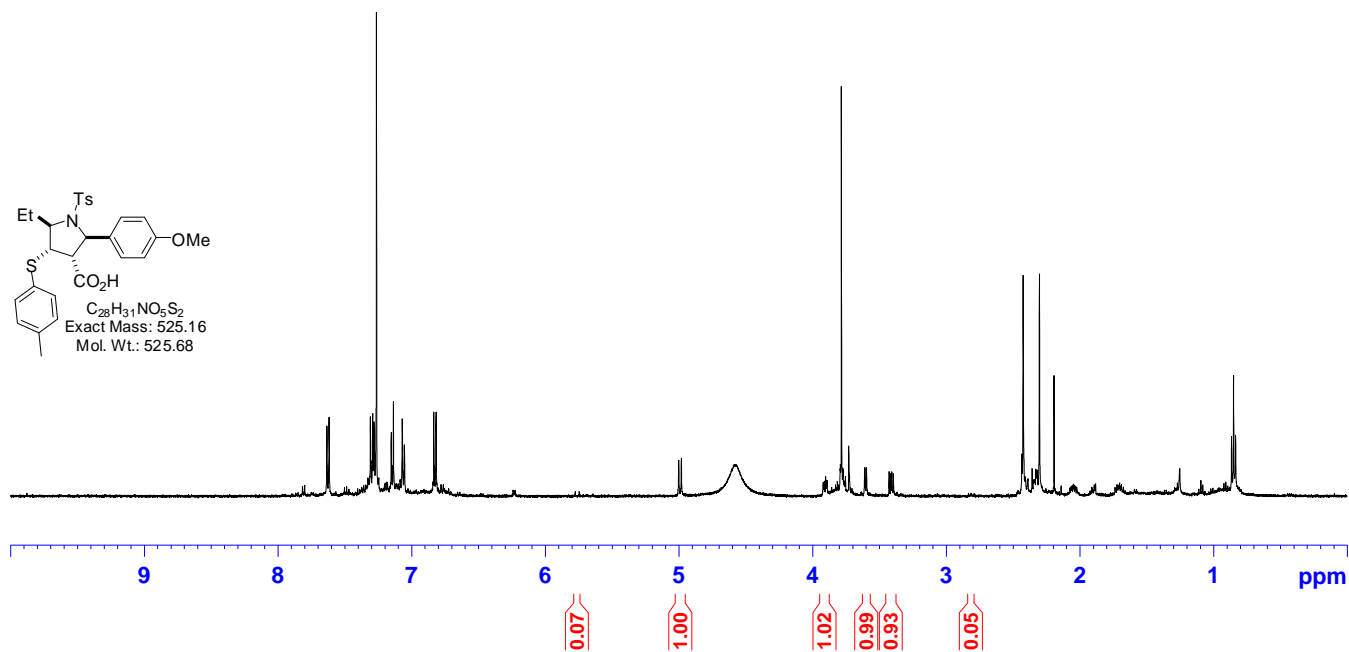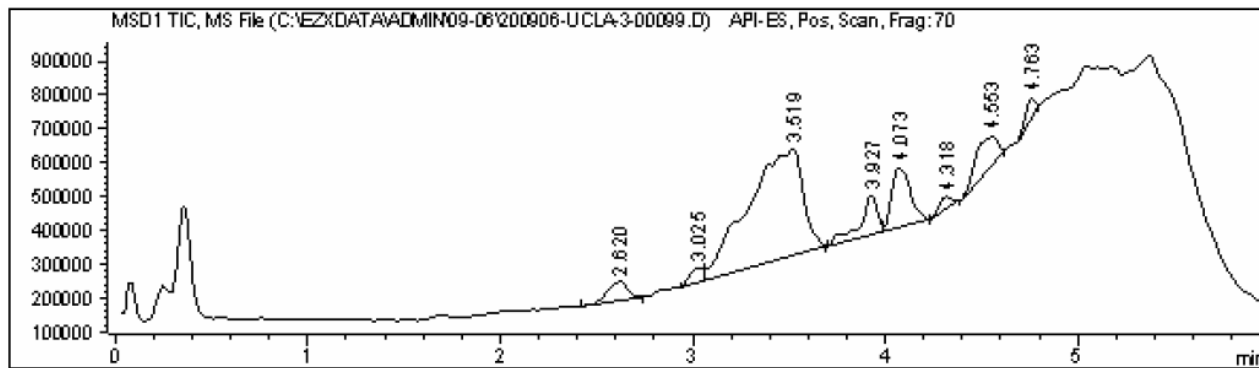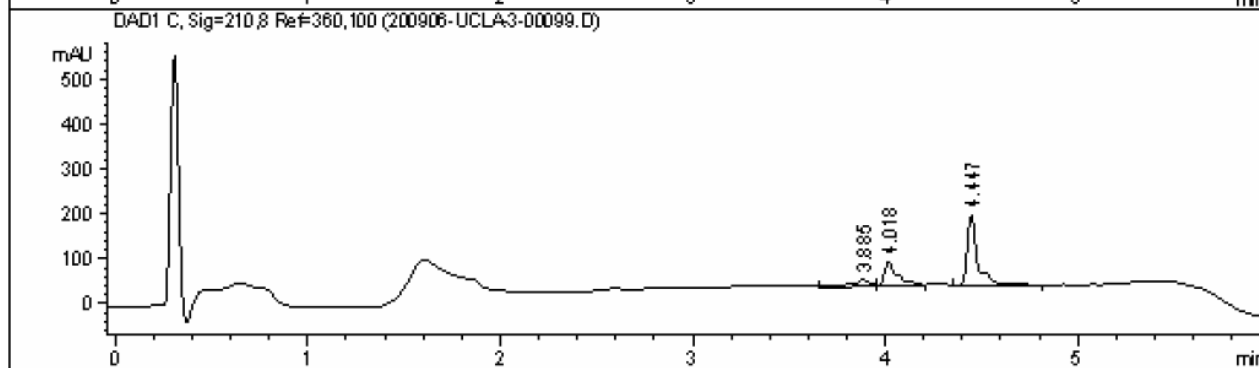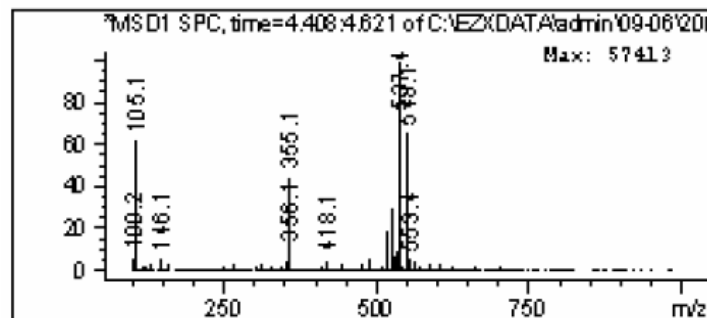

2-(4-Ethoxyphenyl)-5-ethyl-4-(*p*-tolylthio)-1-tosylpyrrolidine-3-carboxylic acid (A05C05E02)

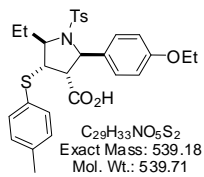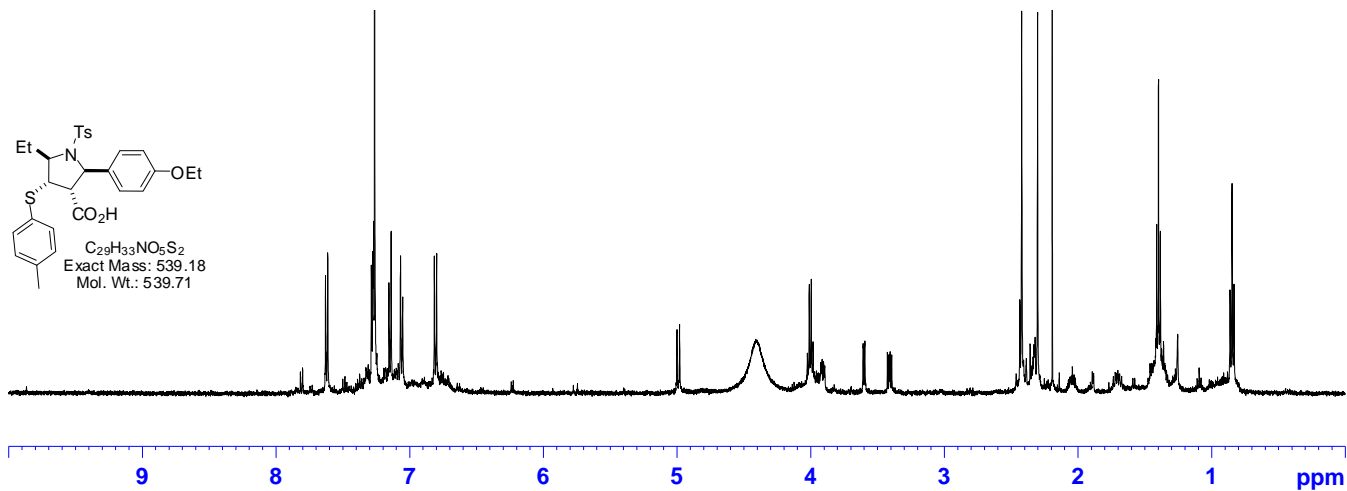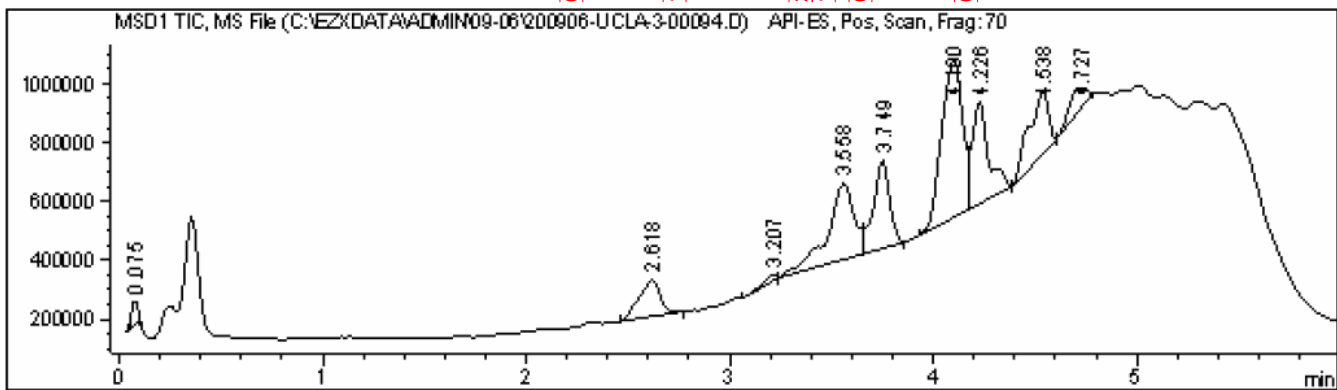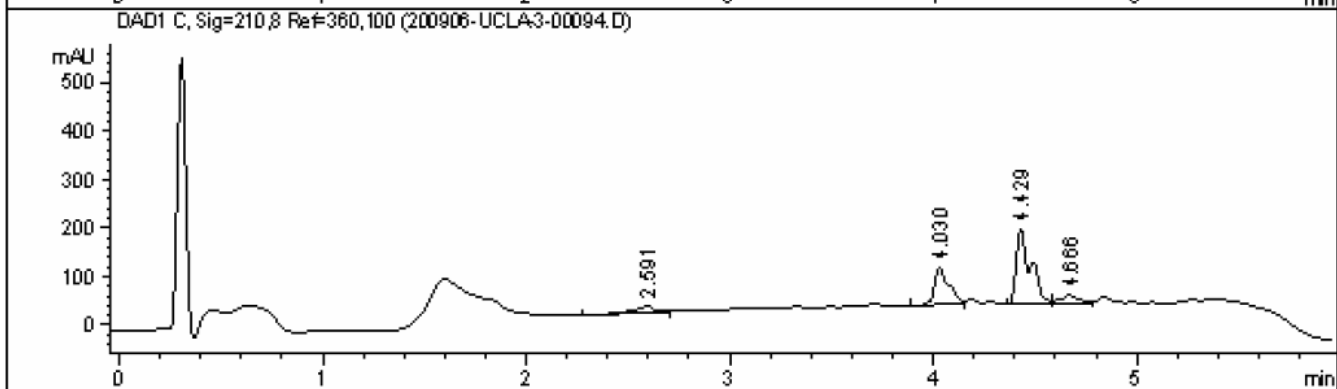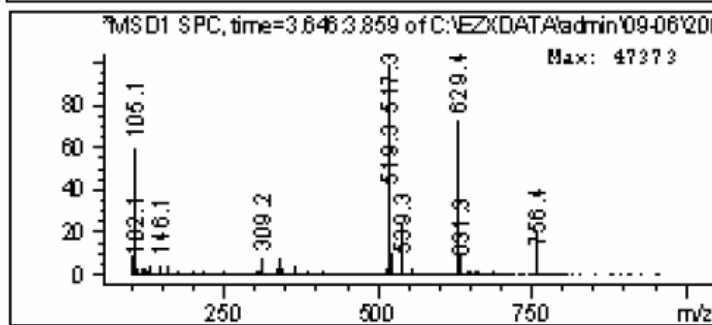



2-(Benzo[d][1,3]dioxol-5-yl)-5-ethyl-4-(p-tolylthio)-1-tosylpyrrolidine-3-carboxylic acid (A05C06C02)

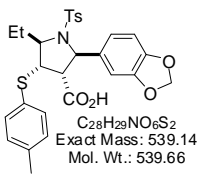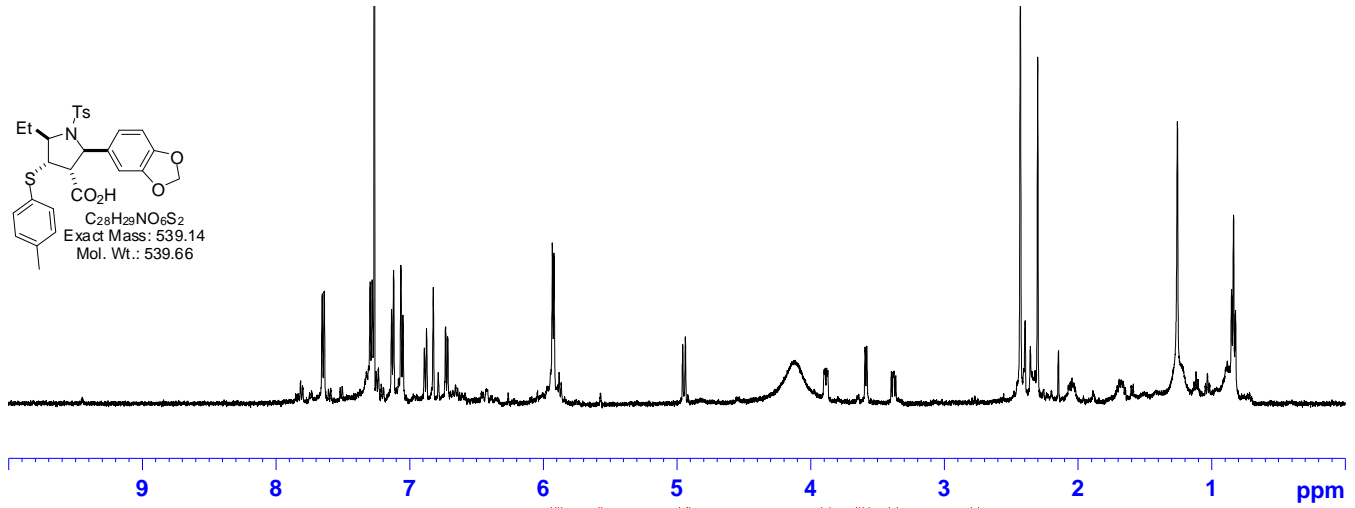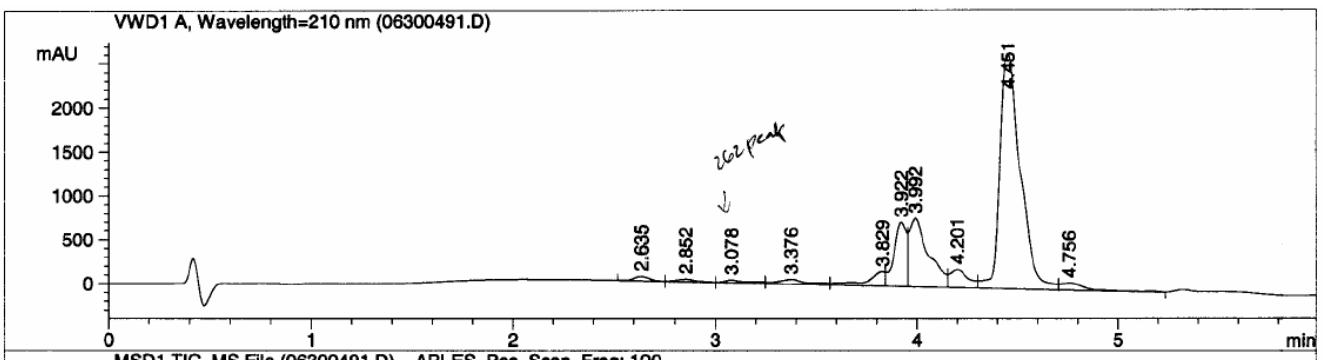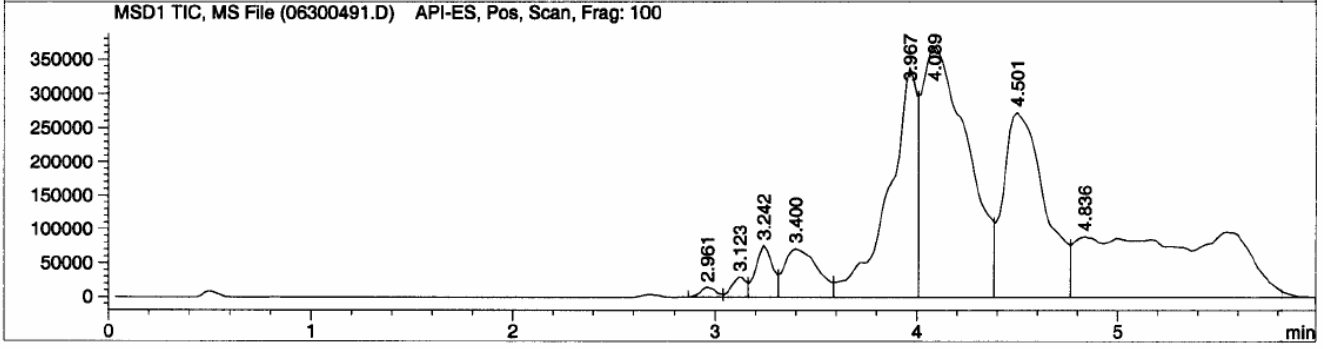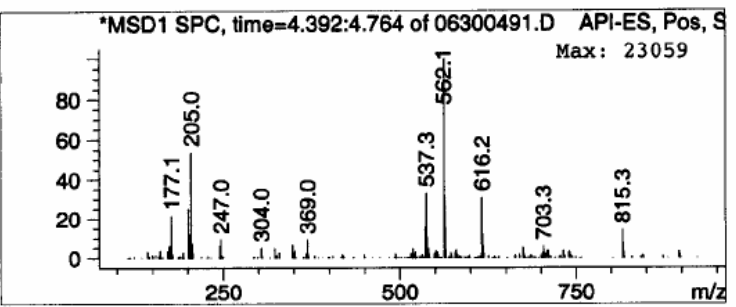

2-(4-Cyanophenyl)-5-ethyl-4-(p-tolylthio)-1-tosylpyrrolidine-3-carboxylic acid (A05C09E02)

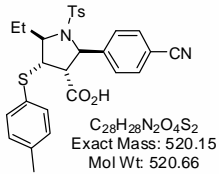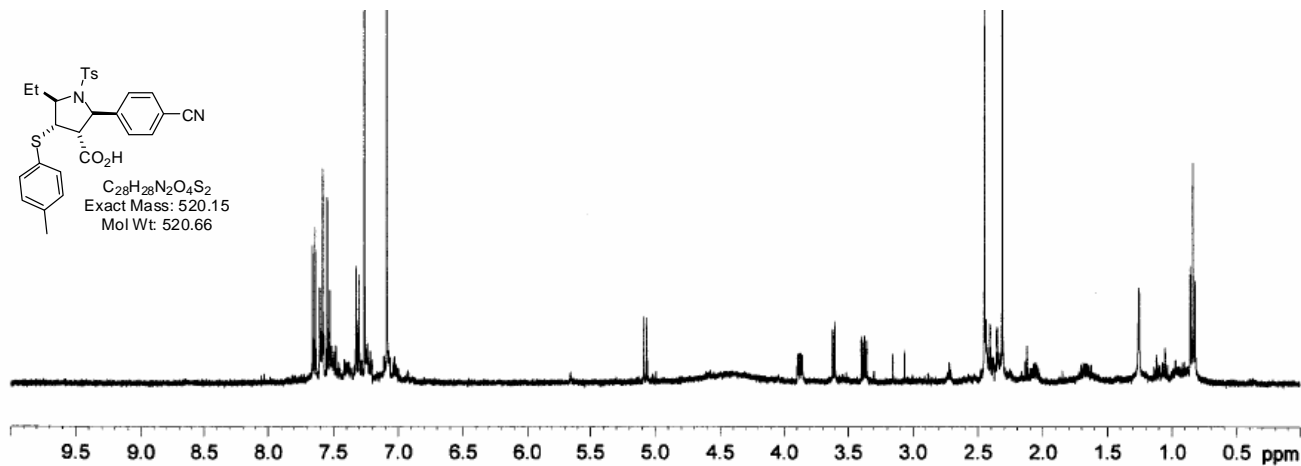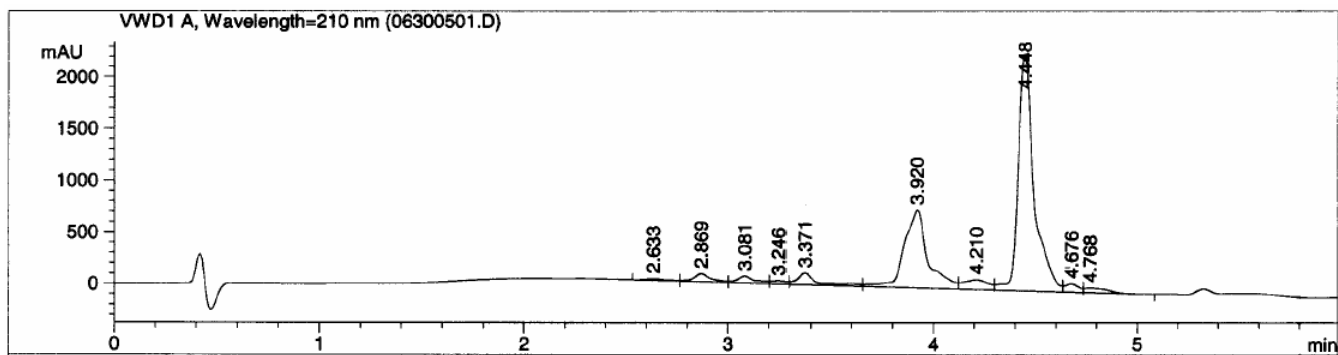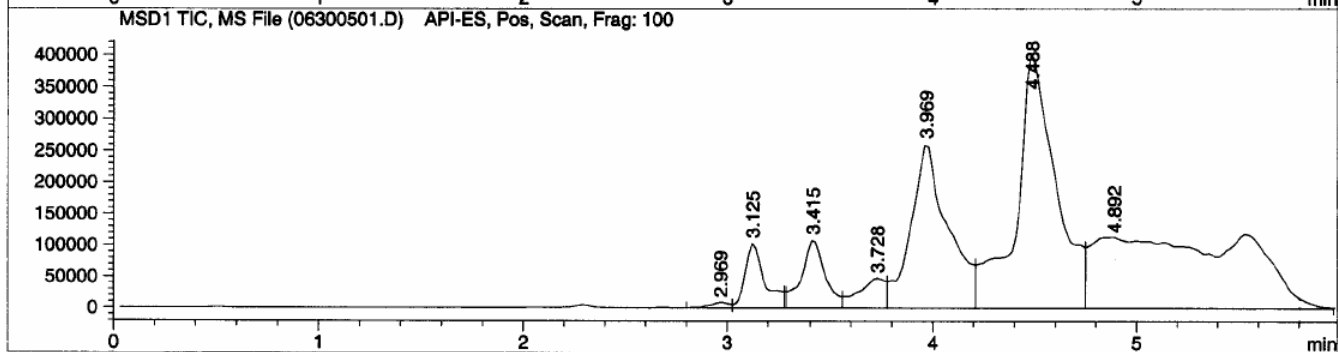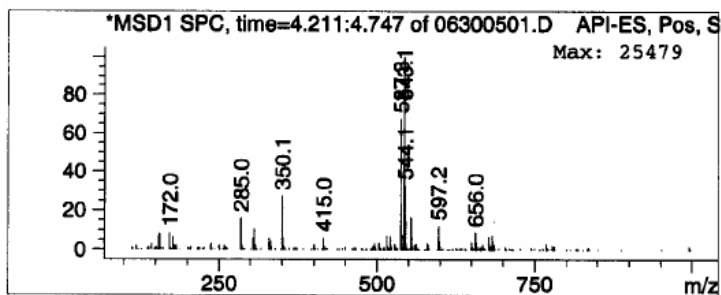

5-Ethyl-2-(2-fluorophenyl)-4-(p-tolylthio)-1-tosylpyrrolidine-3-carboxylic acid (A05C10E02)

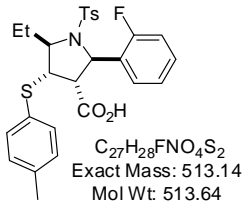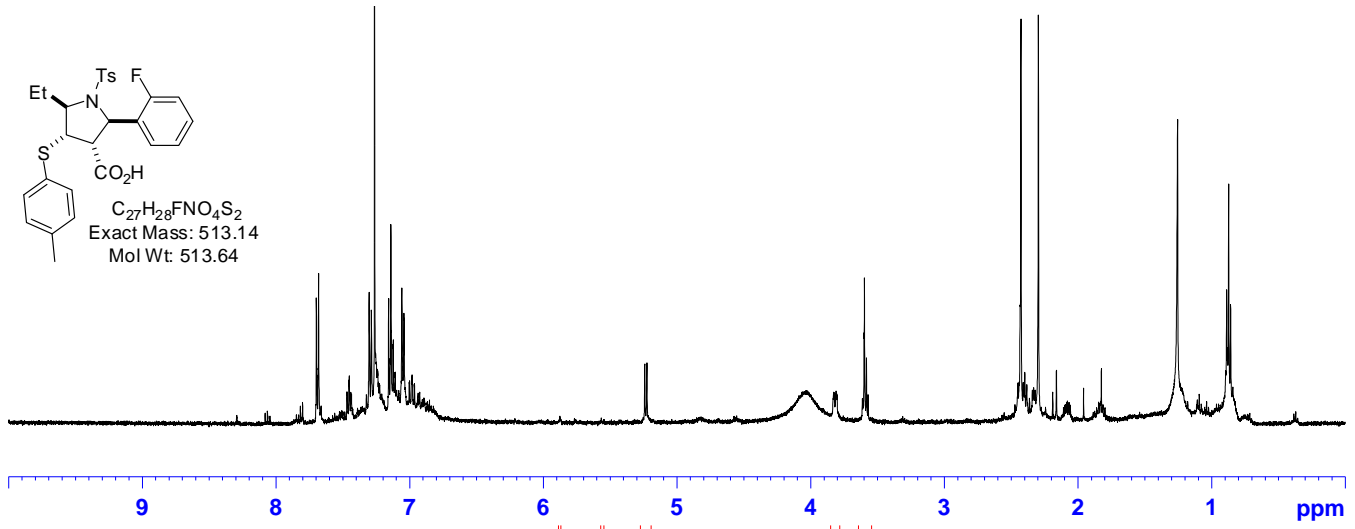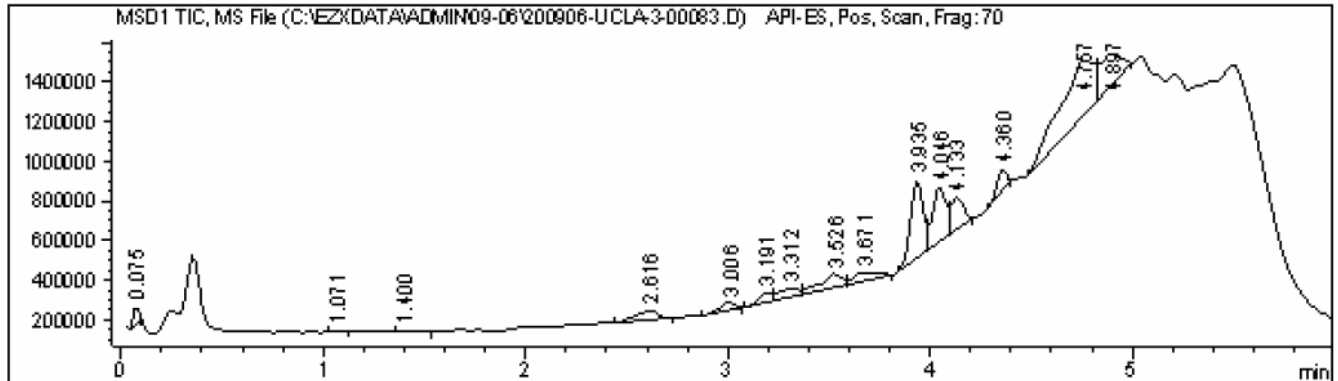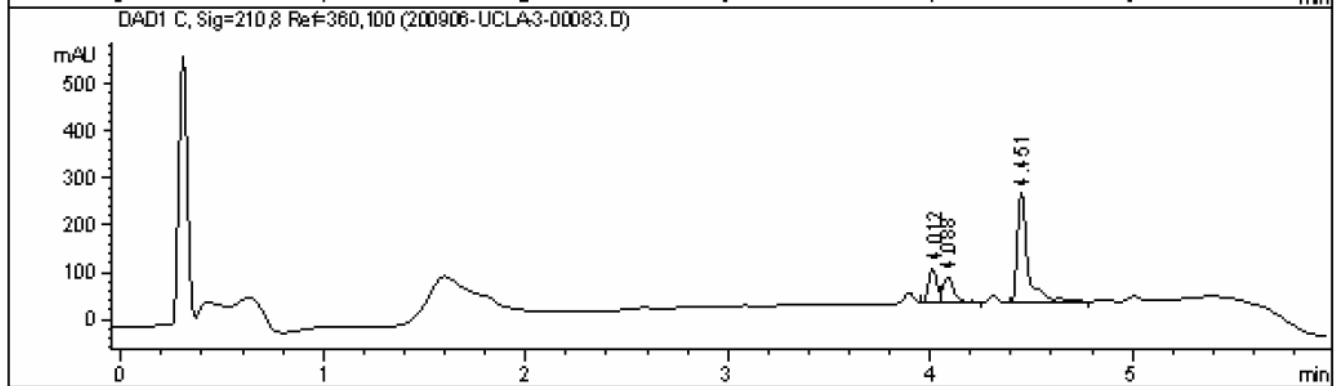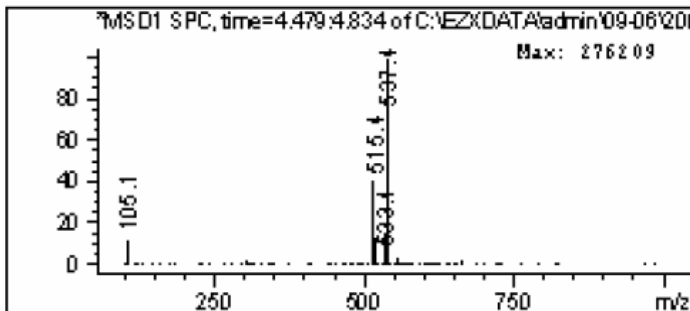

Component 1: Peak at Scan 252.8. Top ions are 514 536

2-(4-Chlorophenyl)-5-ethyl-4-(p-tolylthio)-1-tosylpyrrolidine-3-carboxylic acid (A05C11E02)

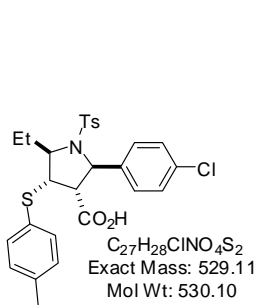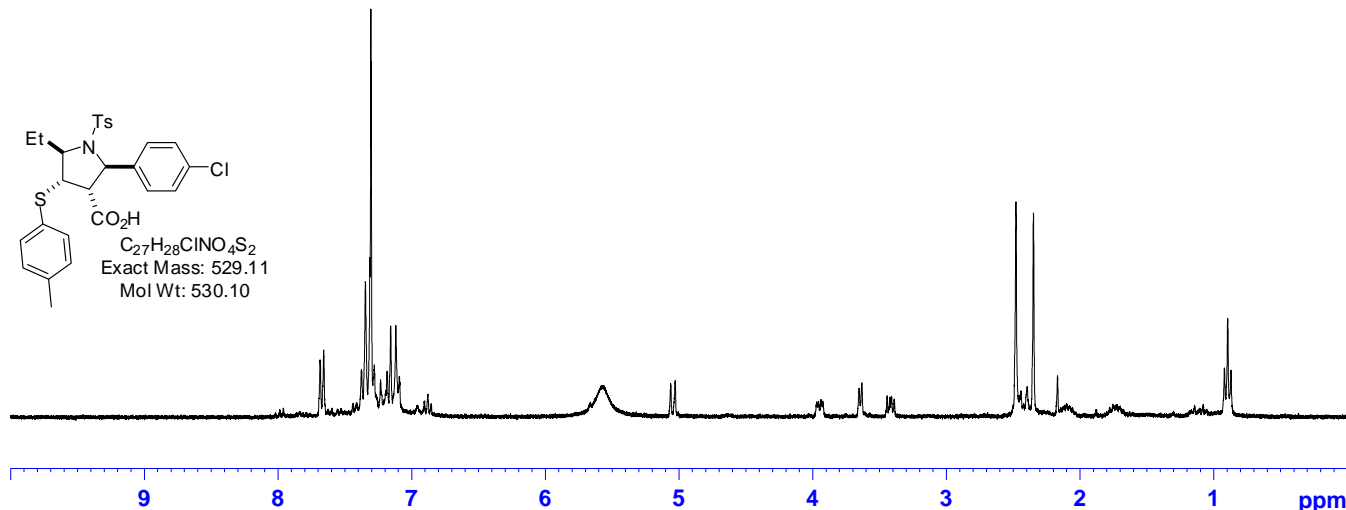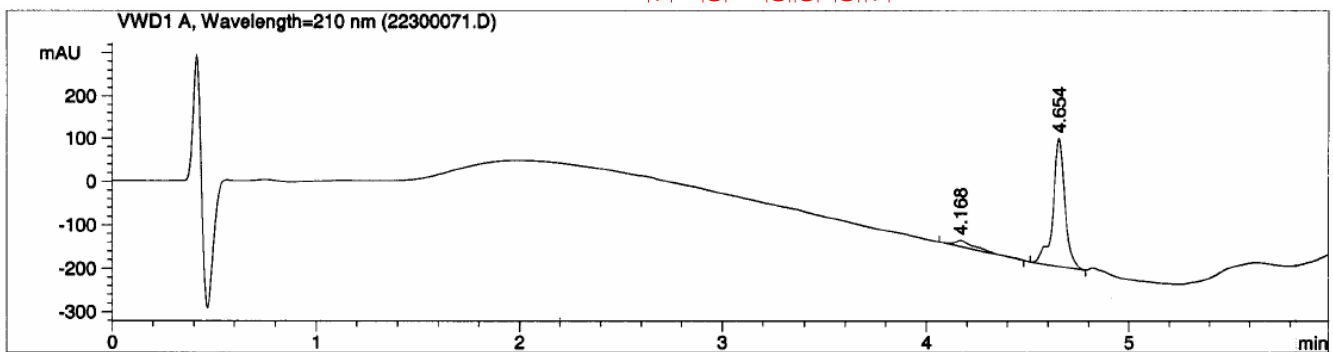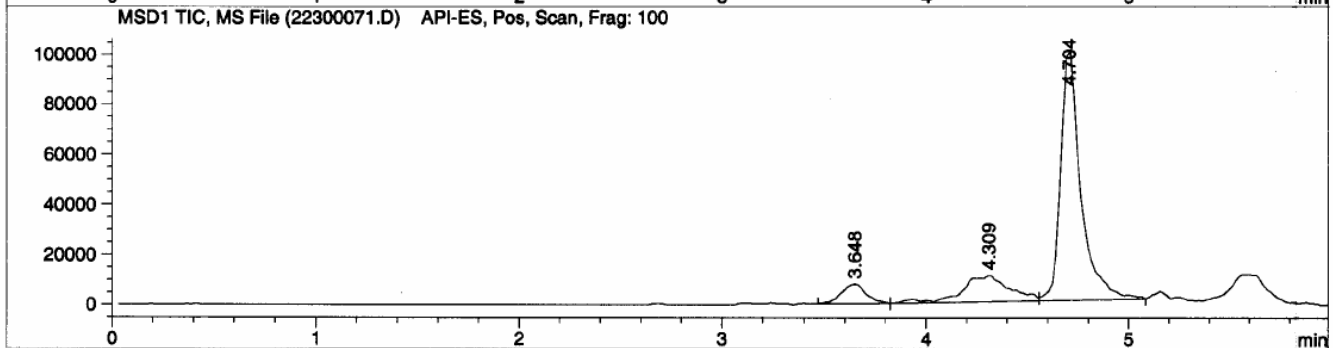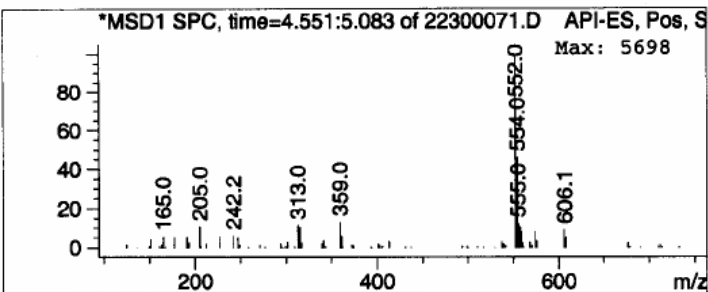

2-(3-Chlorophenyl)-5-ethyl-4-(*p*-tolylthio)-1-tosylpyrrolidine-3-carboxylic acid (A05C12E02)

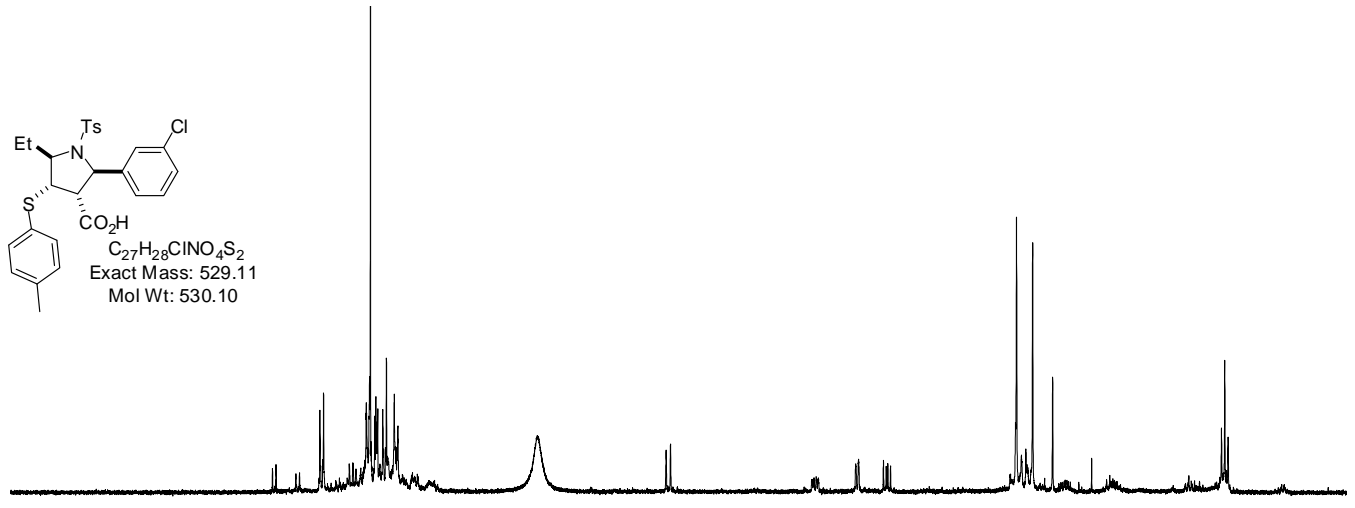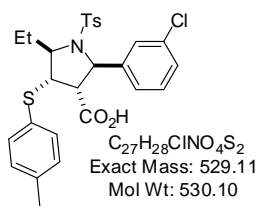

9 8 7 6 5 4 3 2 1 ppm

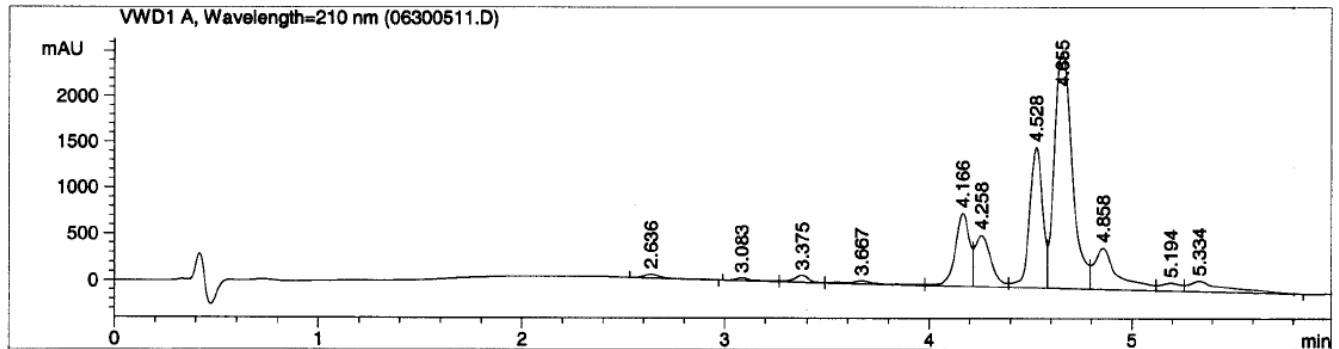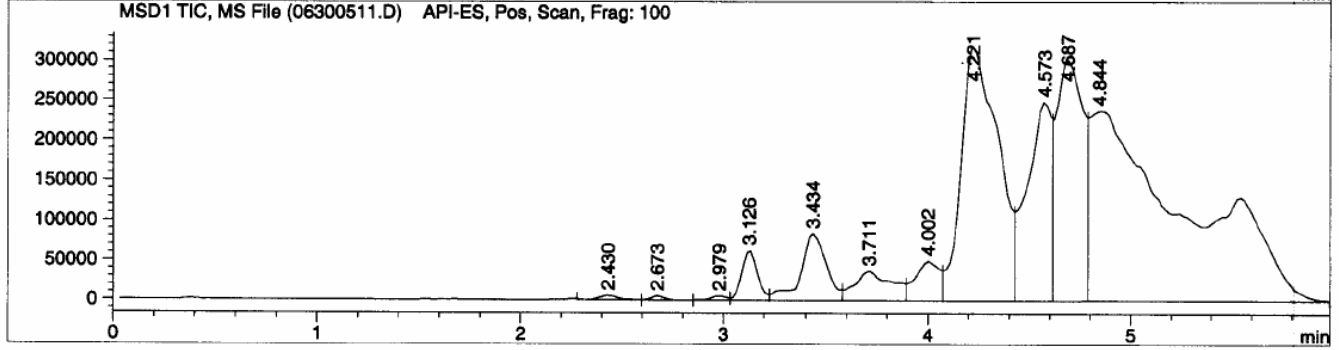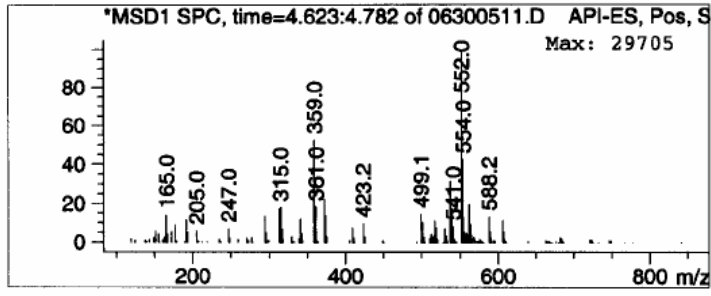

2-(3,4-Dichlorophenyl)-5-ethyl-4-(*p*-tolylthio)-1-tosylpyrrolidine-3-carboxylic acid (A05C13E02)

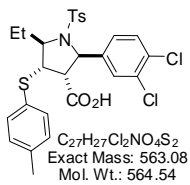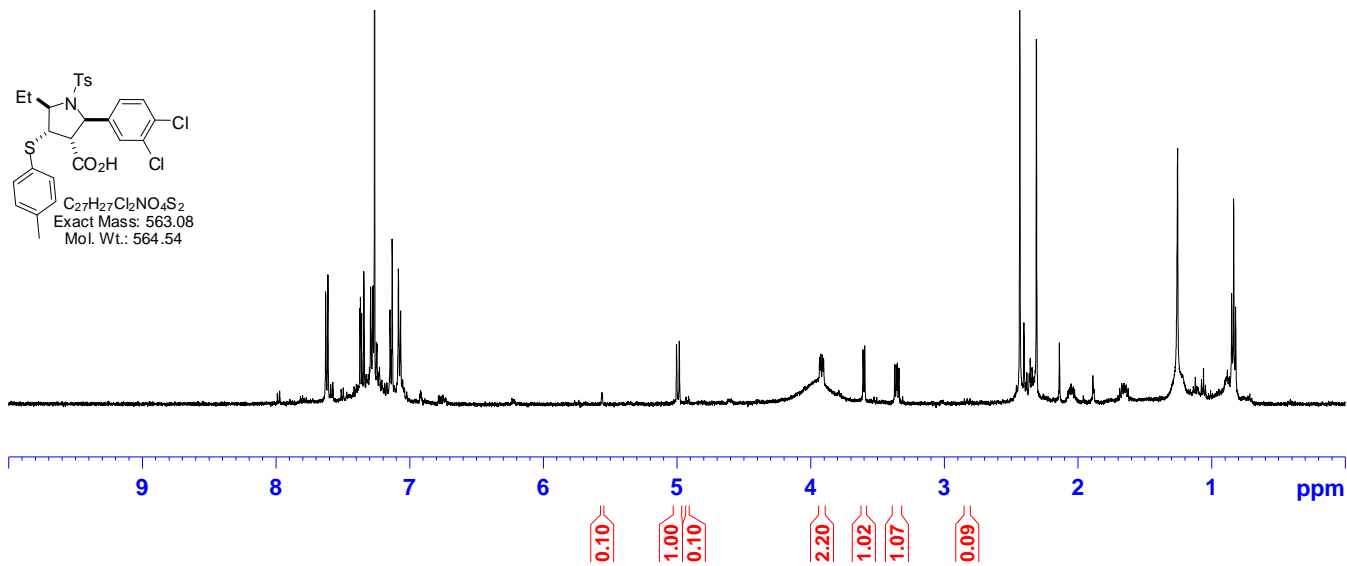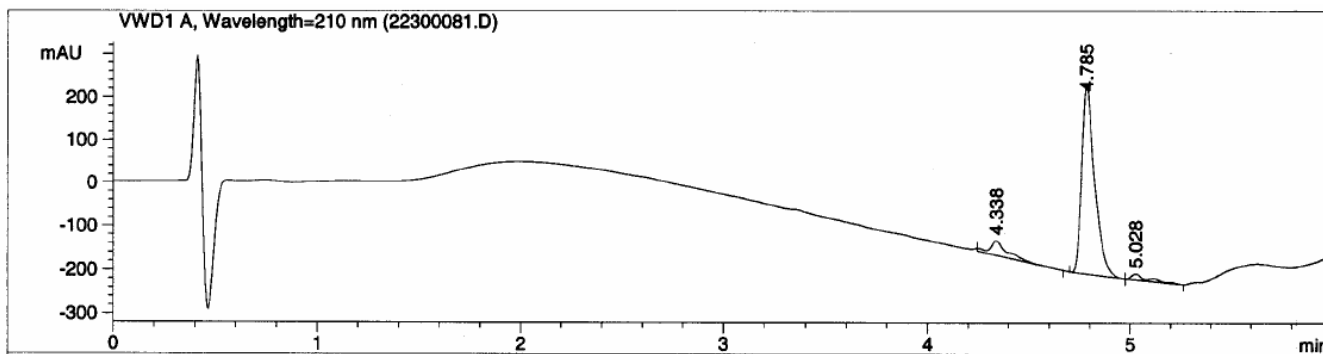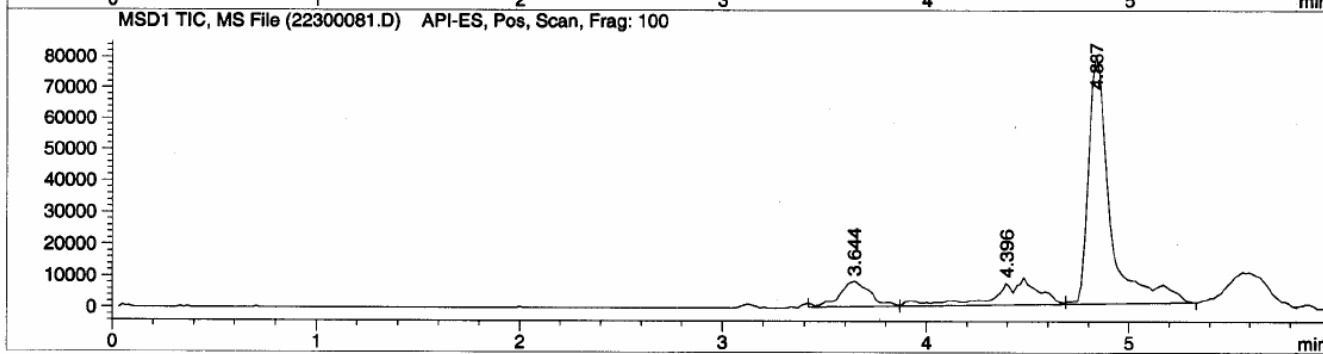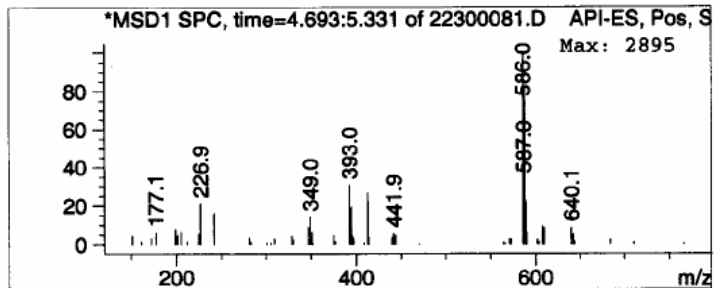

2-(4-Bromophenyl)-5-ethyl-4-(p-tolylthio)-1-tosylpyrrolidine-3-carboxylic acid (A05C14E02)

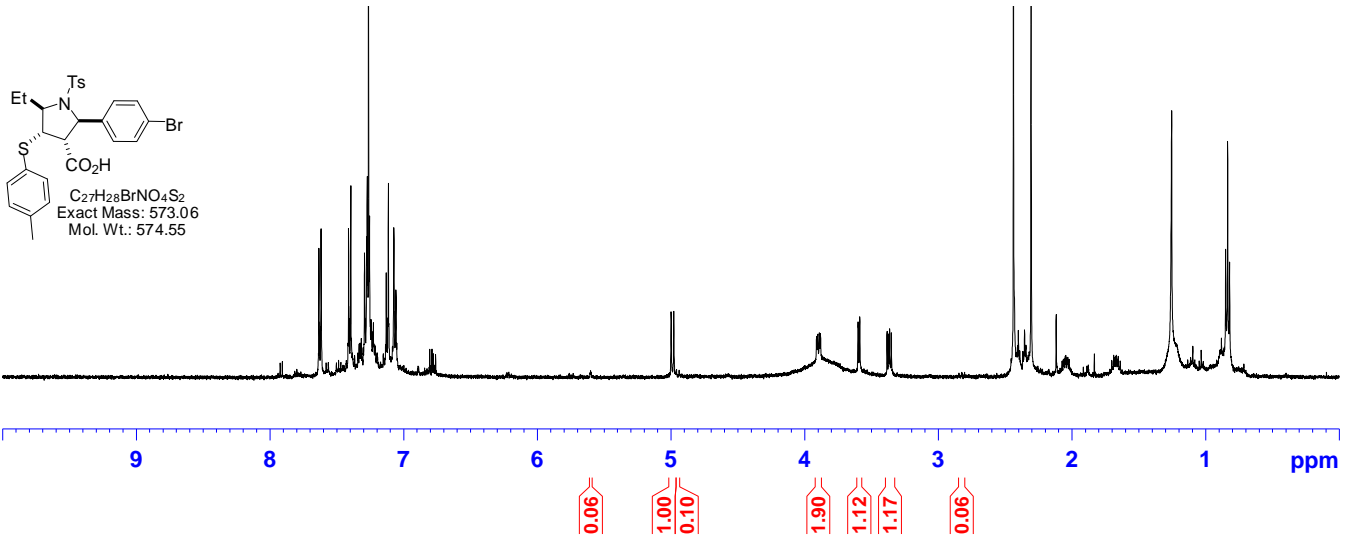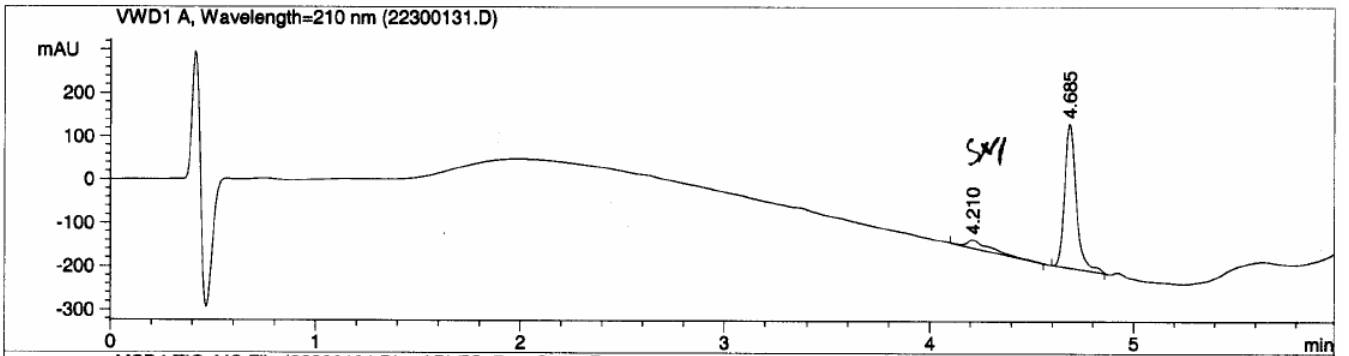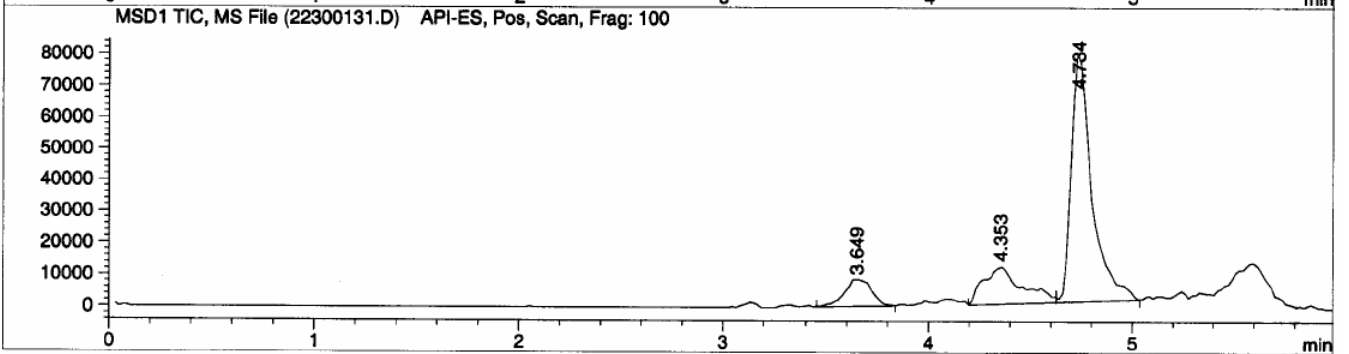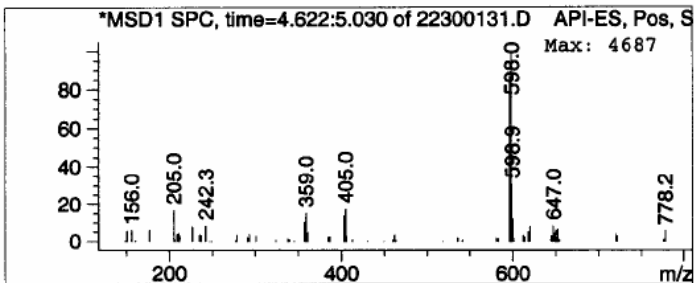

**2-(3-Bromophenyl)-5-ethyl-4-(*p*-tolylthio)-1-tosylpyrrolidine-3-carboxylic acid (A05C15E02)**

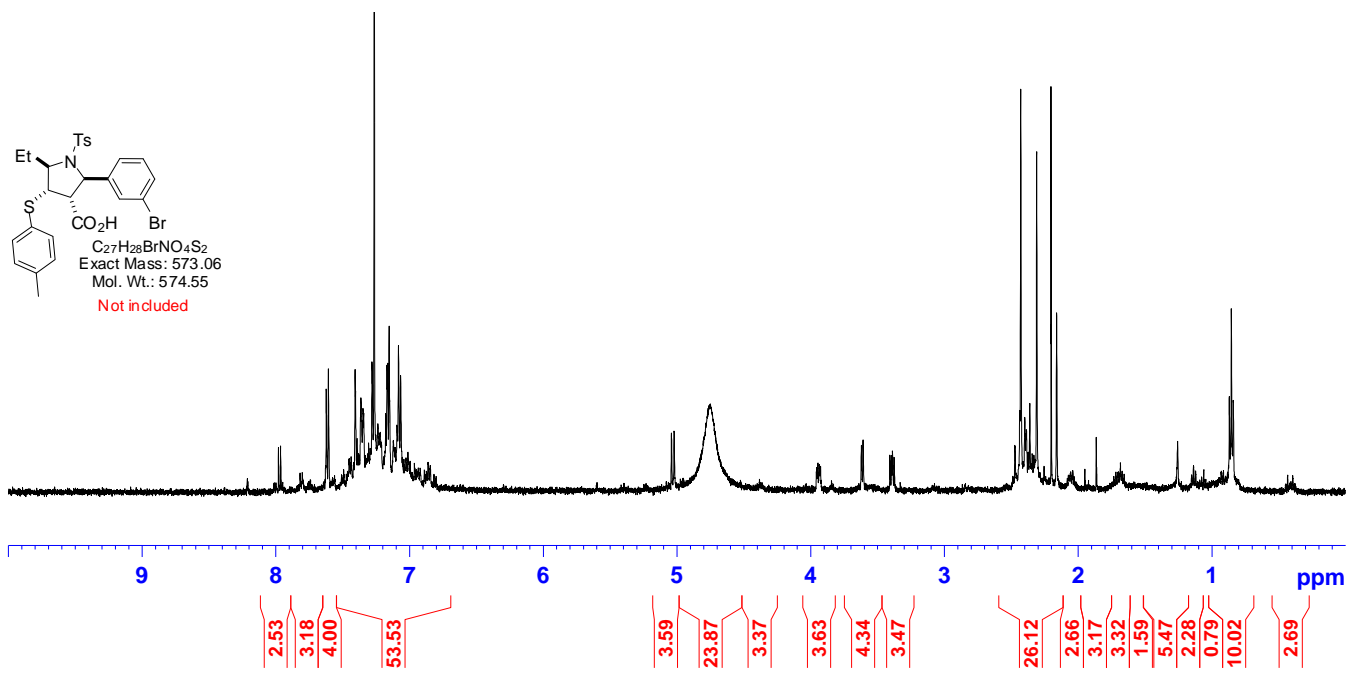



5-Ethyl-2-(naphthalen-1-yl)-4-(p-tolylthio)-1-tosylpyrrolidine-3-carboxylic acid (A05C16E02)

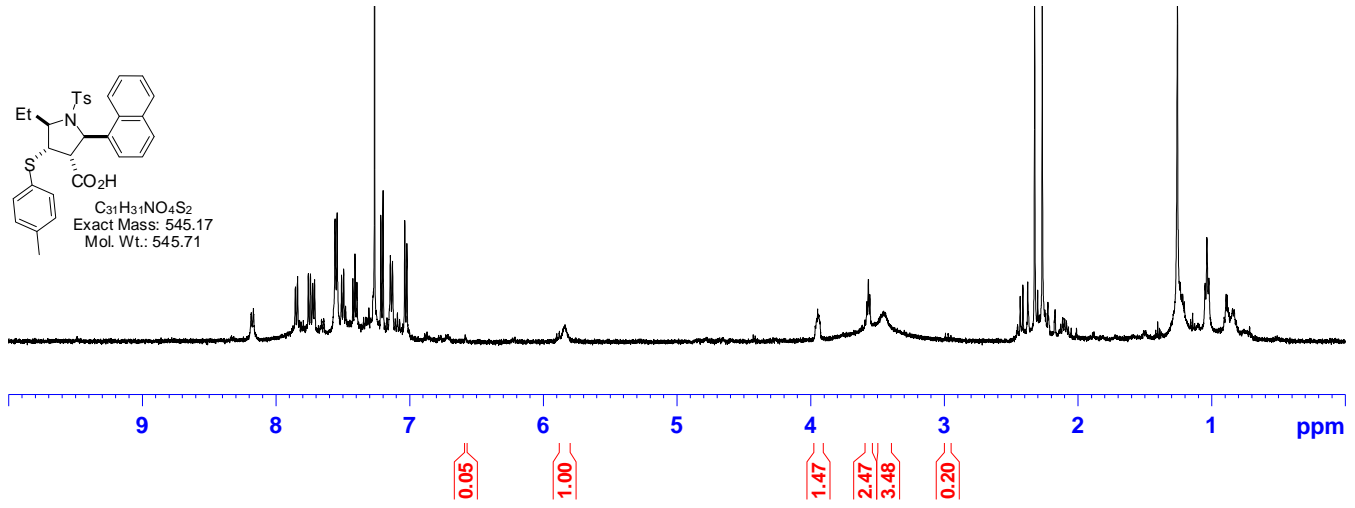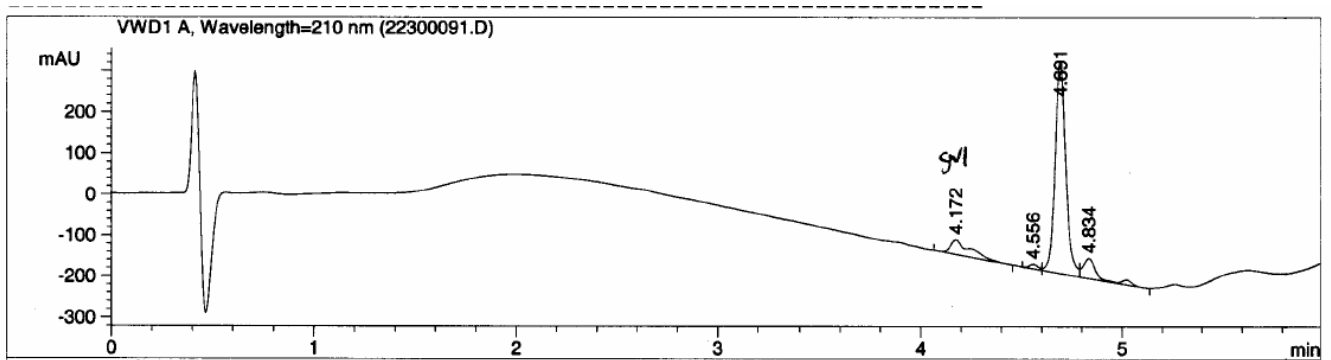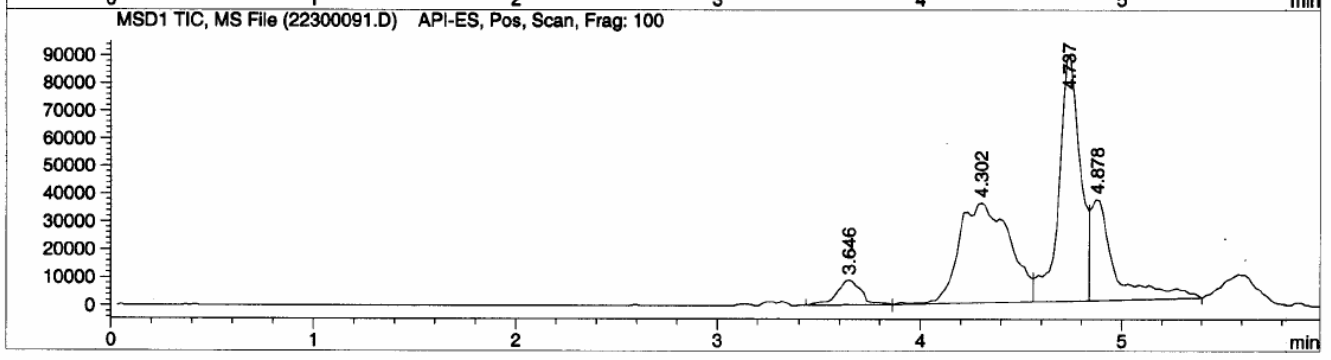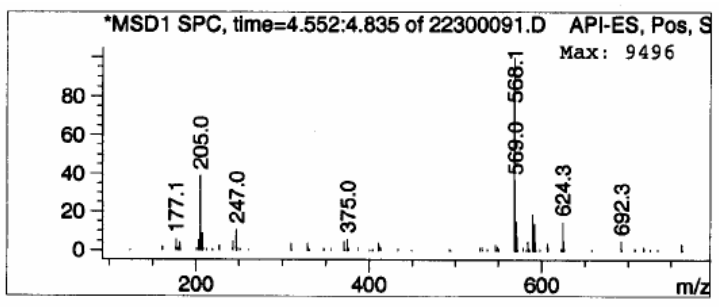

5-Ethyl-1-(methylsulfonyl)-2-phenyl-4-(*p*-tolylthio)pyrrolidine-3-carboxylic acid (A05C19E02)

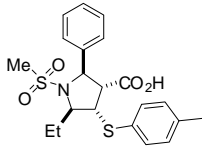

C<sub>21</sub>H<sub>25</sub>NO<sub>4</sub>S<sub>2</sub>  
 Exact Mass: 419.12  
 Mol. Wt.: 419.56

Not included

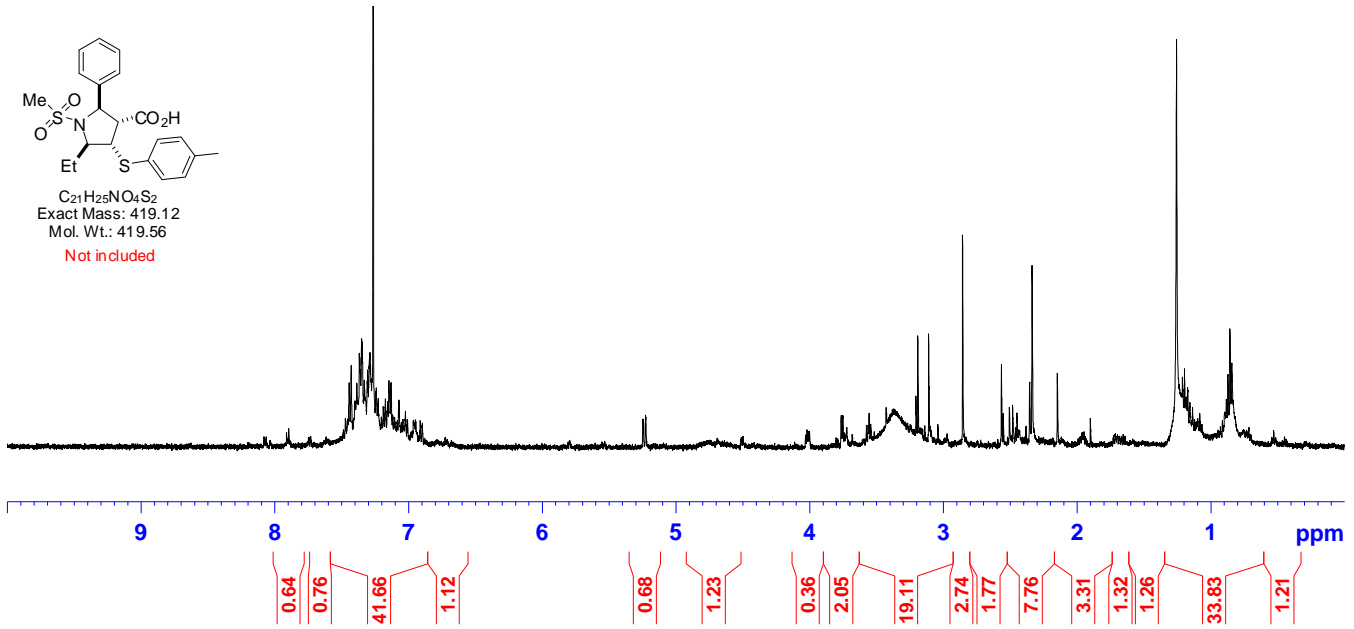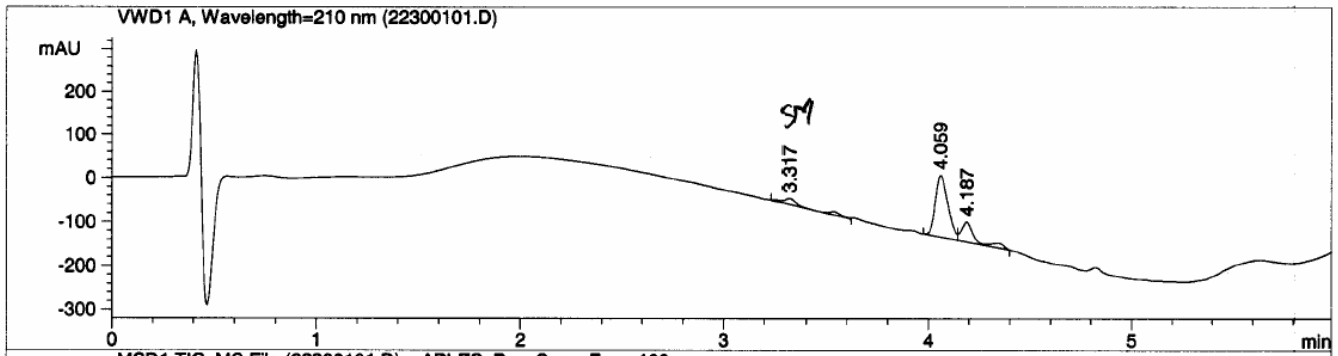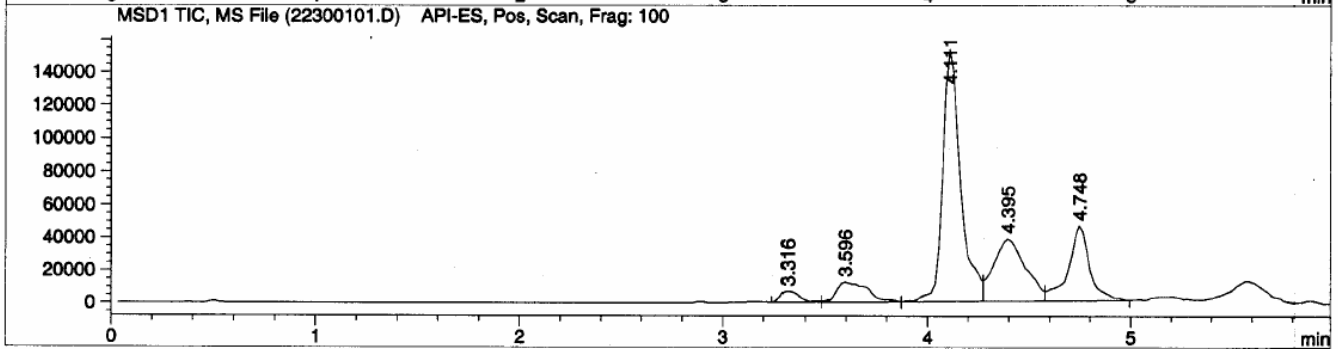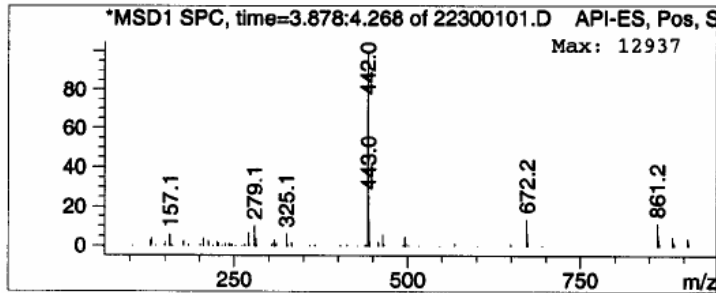

# 2-(3,4-Dimethoxyphenyl)-5-ethyl-4-(p-tolylthio)-1-tosylpyrrolidine-3-carboxylic acid (A05C20E02)

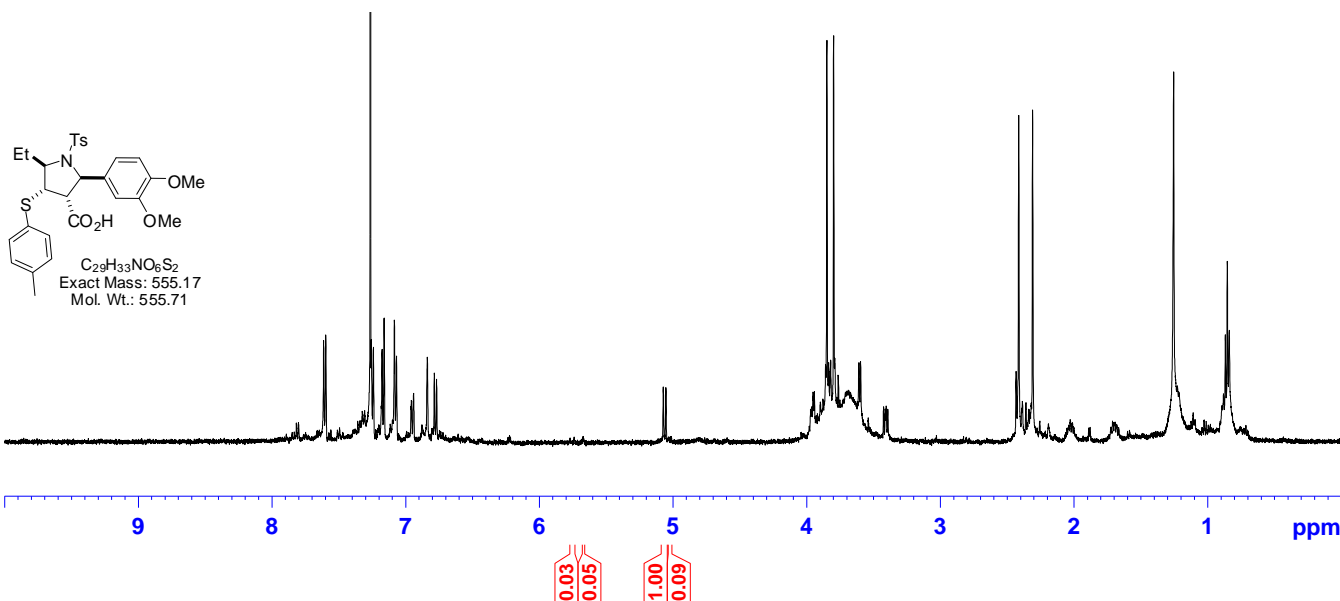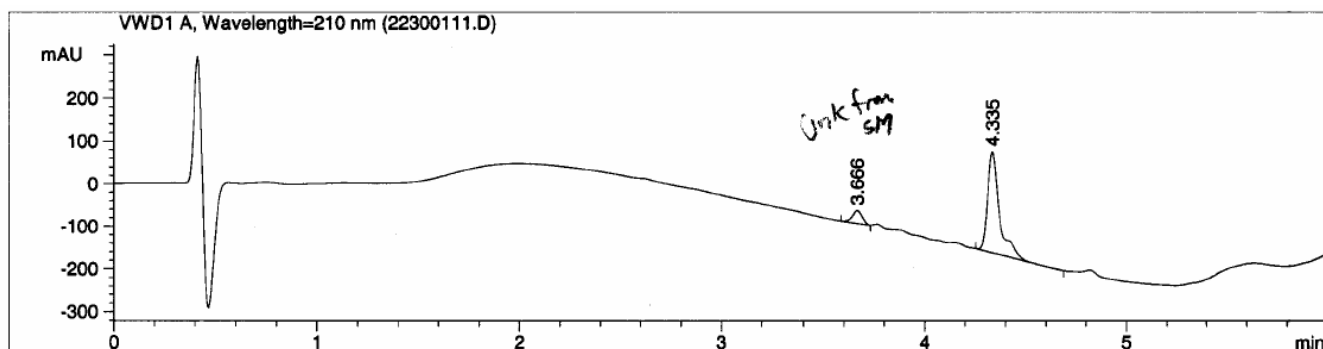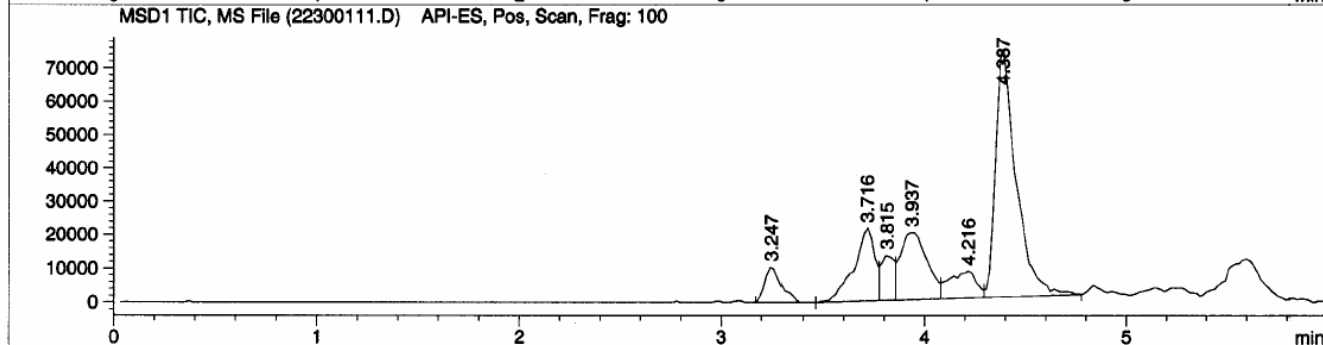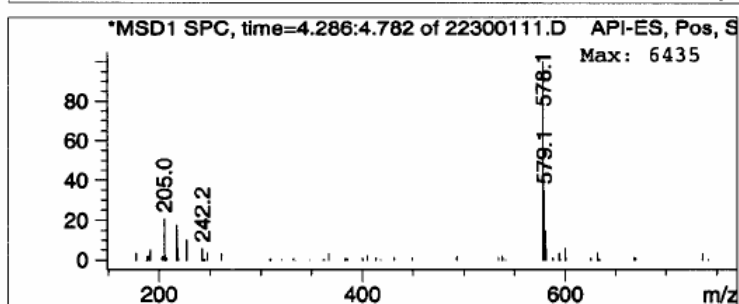

**5-Ethyl-2-(thiophen-2-yl)-4-(p-tolylthio)-1-tosylpyrrolidine-3-carboxylic acid (A05C21E02)**

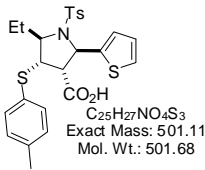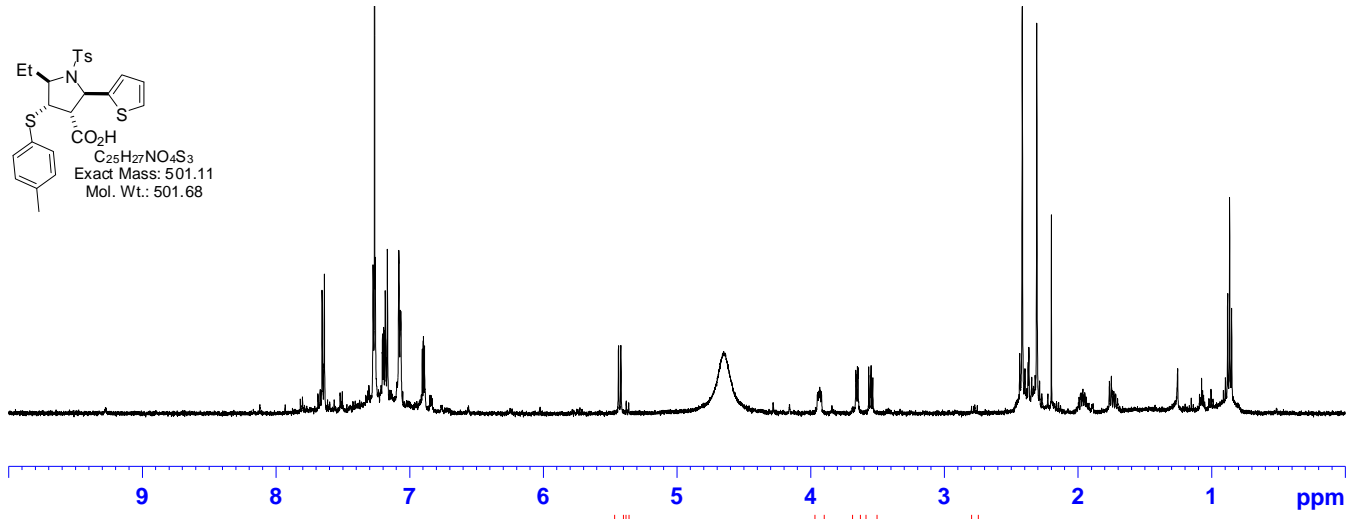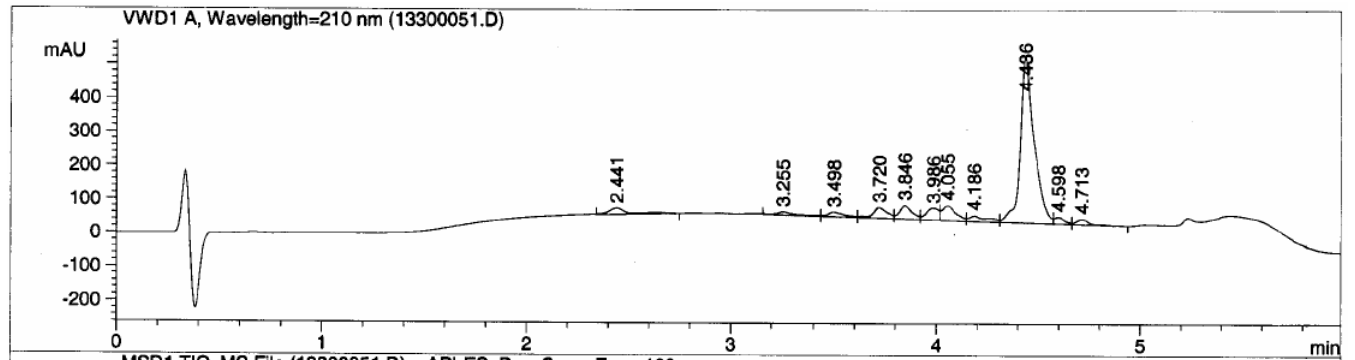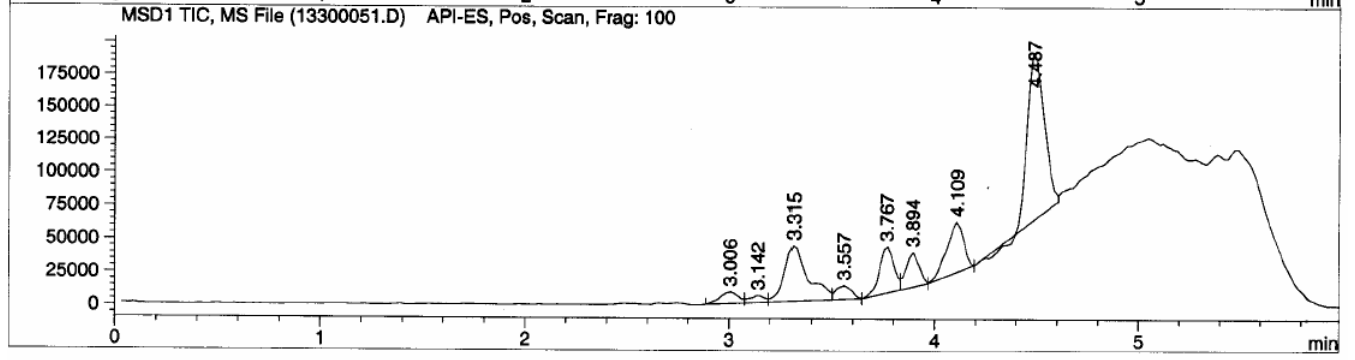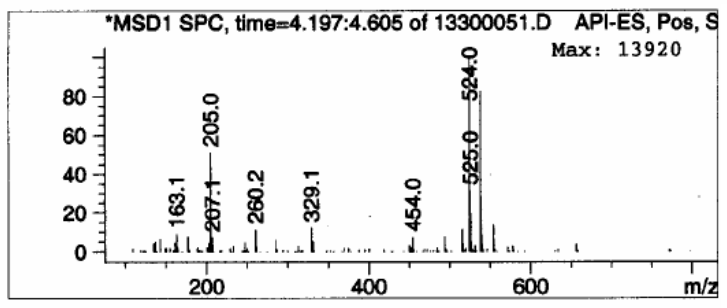

**5-Ethyl-2-(4-fluorophenyl)-4-(p-tolylthio)-1-tosylpyrrolidine-3-carboxylic acid (A05C23E02)**

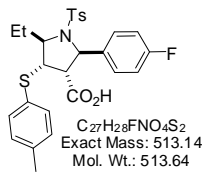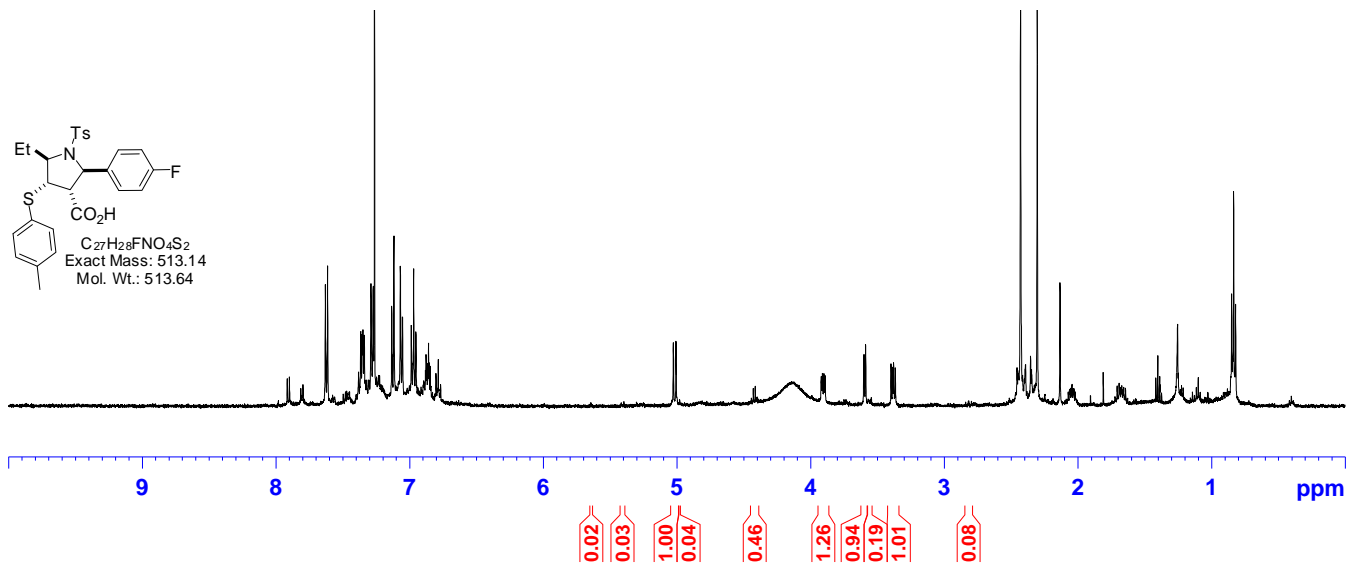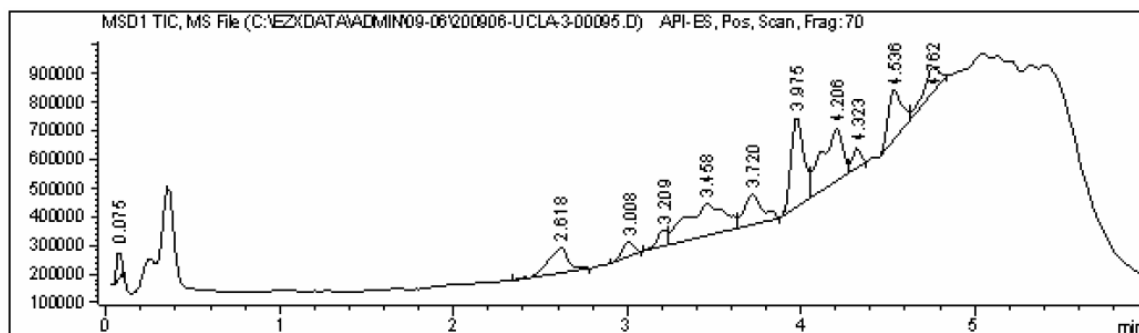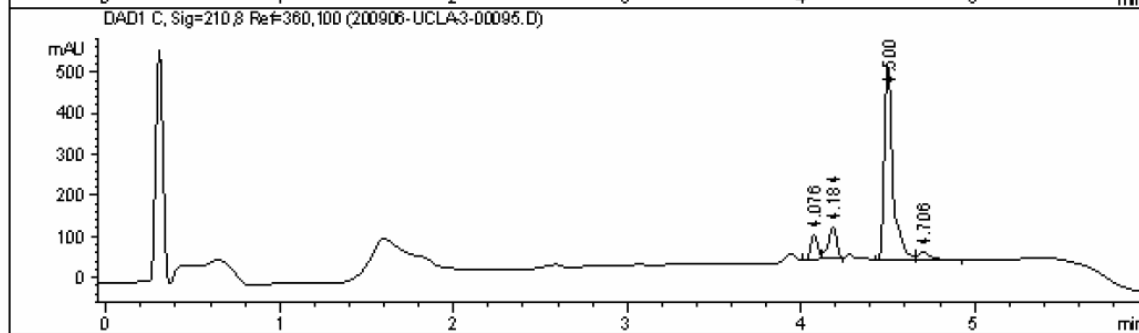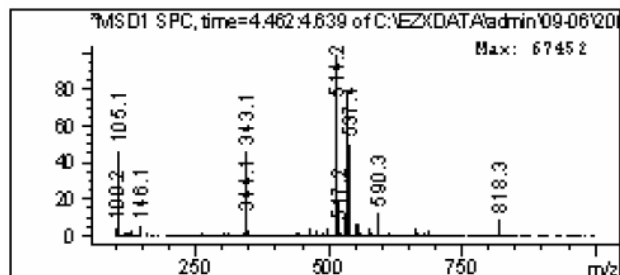

**5-Ethyl-2-(4-isopropylphenyl)-4-(p-tolylthio)-1-tosylpyrrolidine-3-carboxylic acid (A05C24E02)**

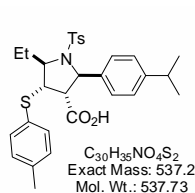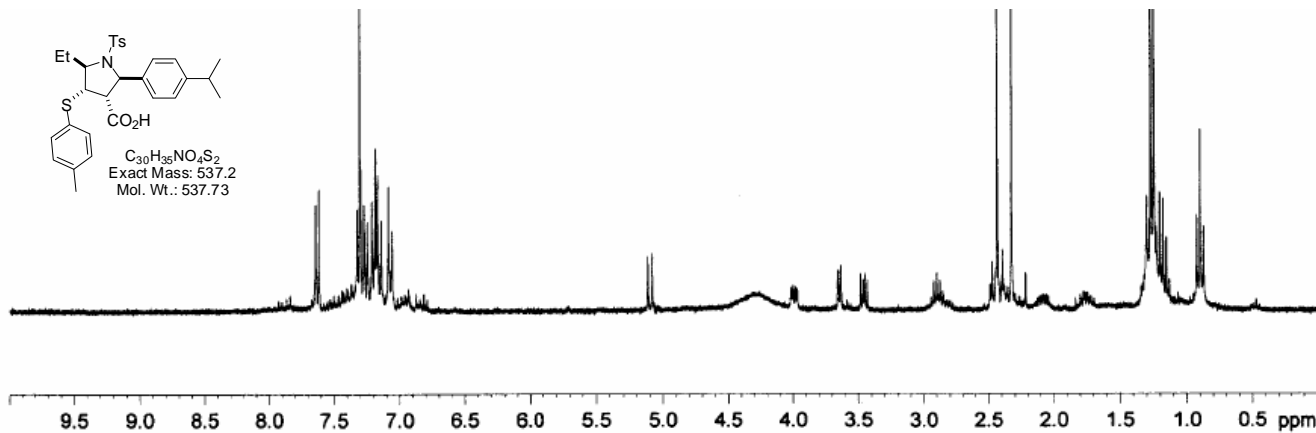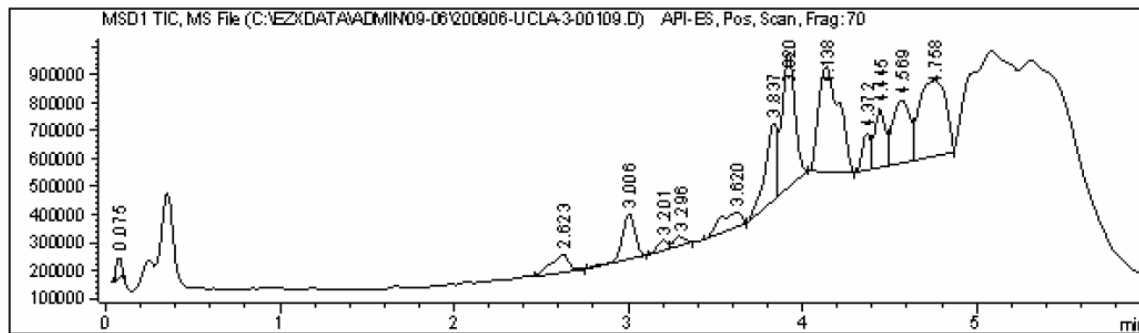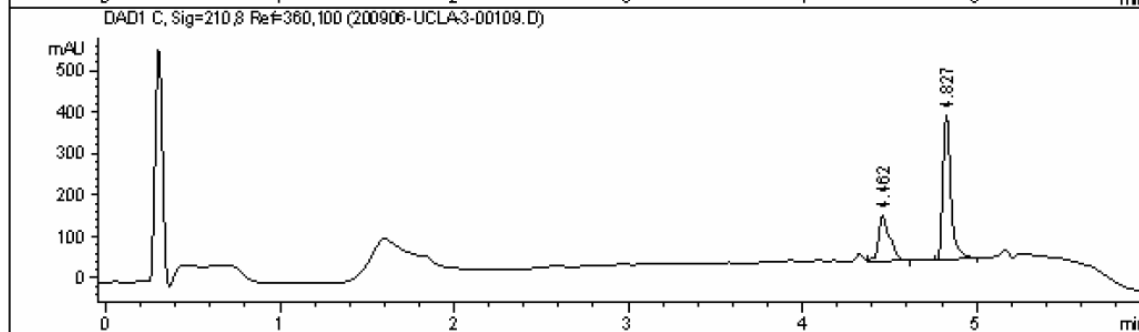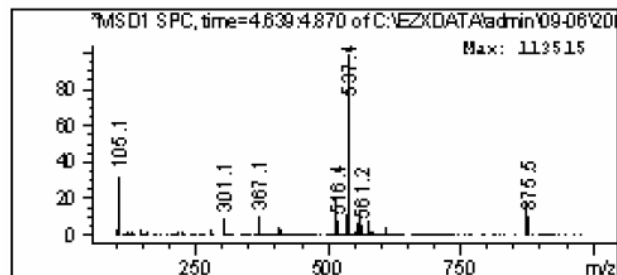

5-Ethyl-2-(3-fluorophenyl)-4-(p-tolylthio)-1-tosylpyrrolidine-3-carboxylic acid (A05C26E02)

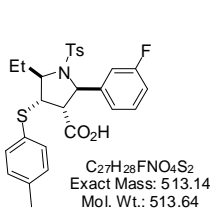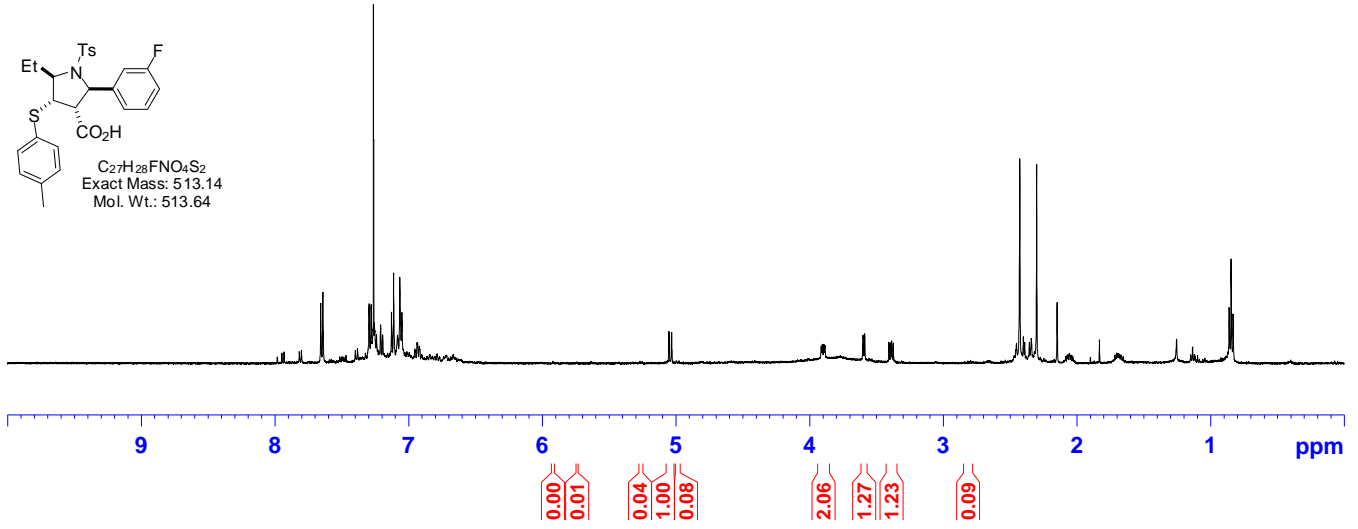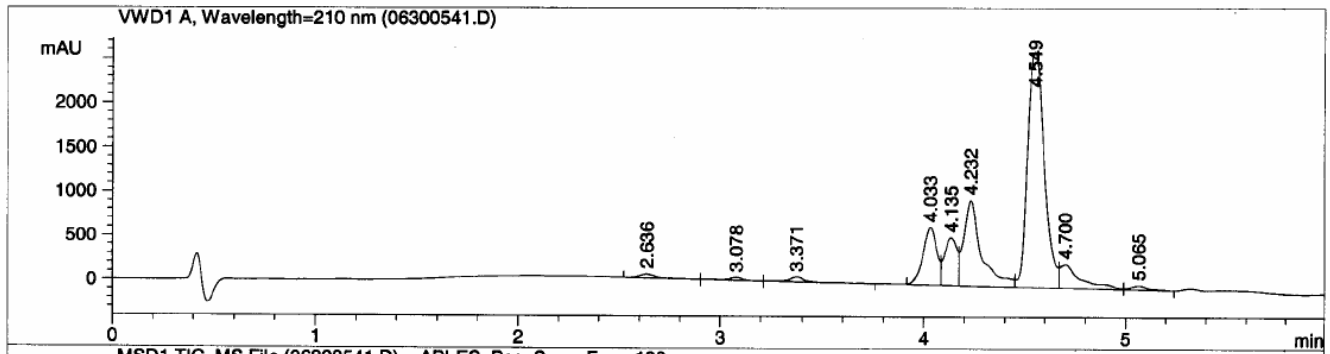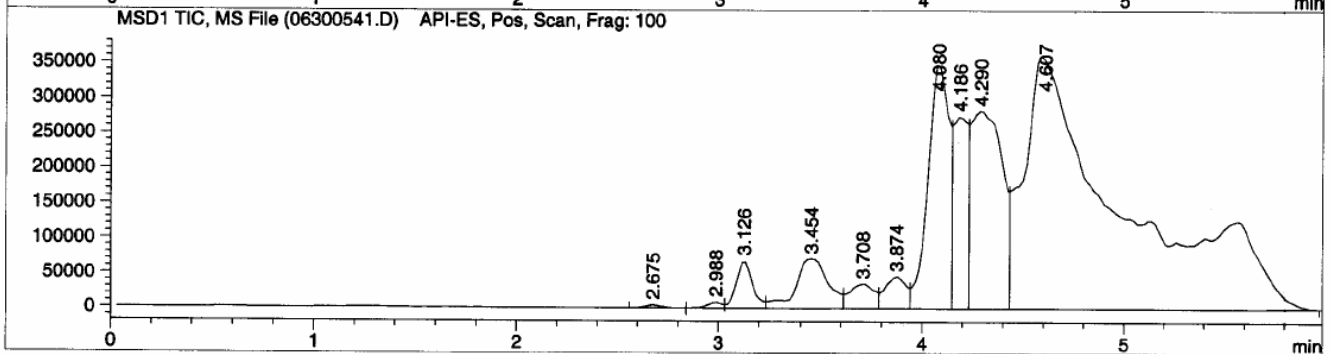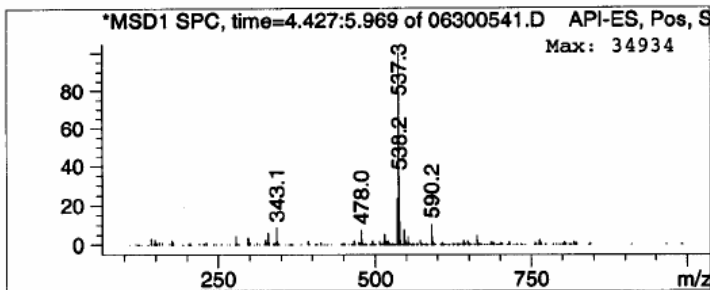

2-(4-Chlorophenyl)-1-(4-chlorophenylsulfonyl)-5-ethyl-4-(p-tolylthio)pyrrolidine-3-carboxylic acid (A05C27E02)

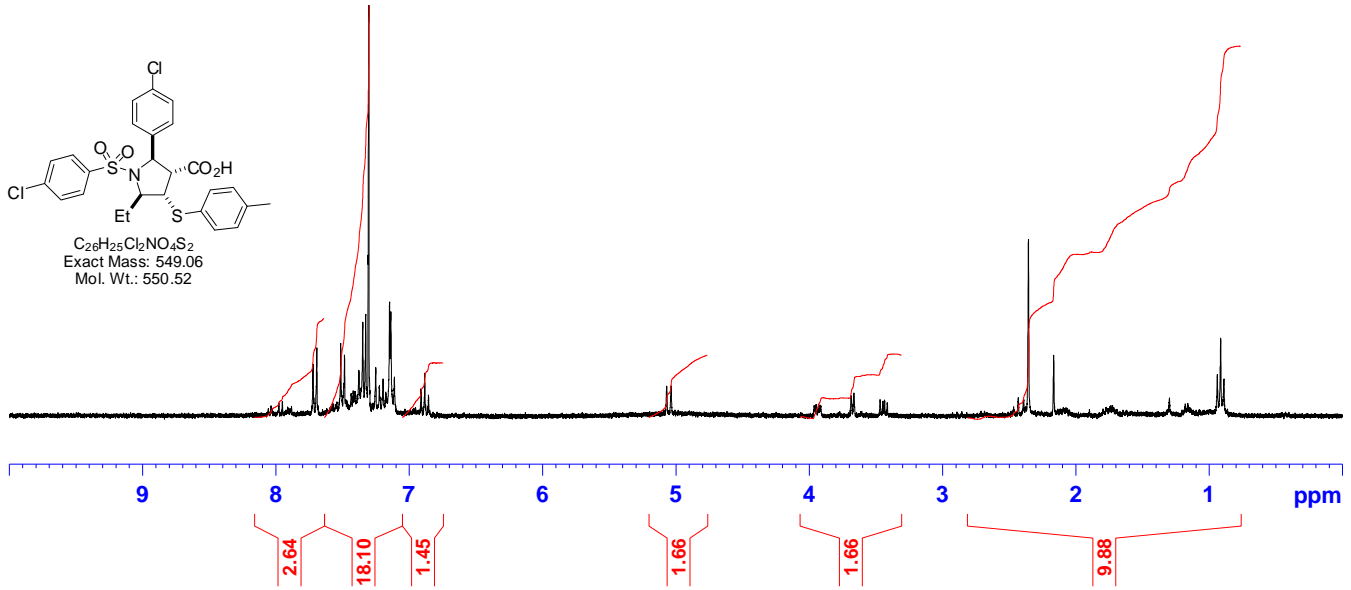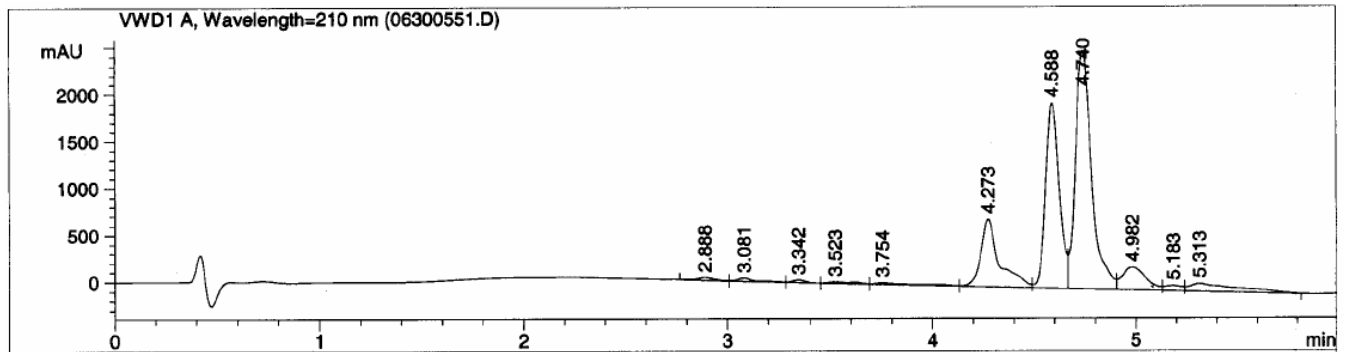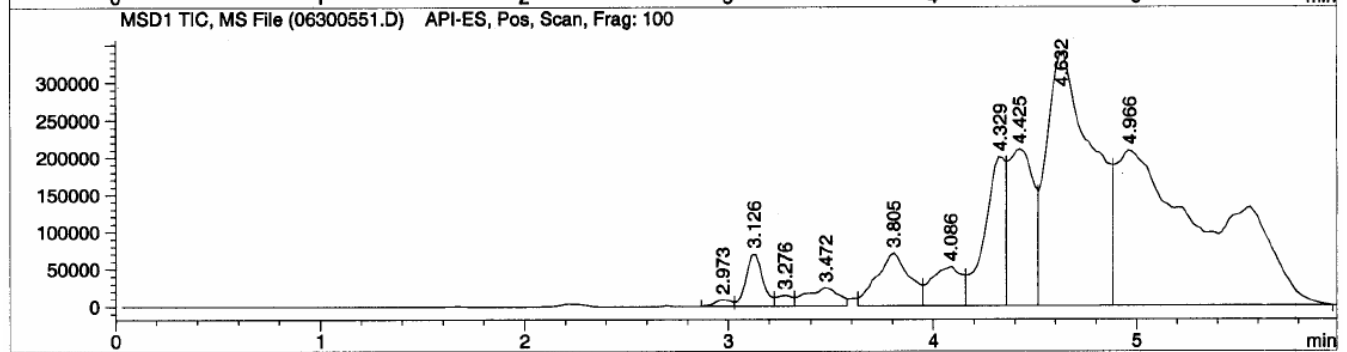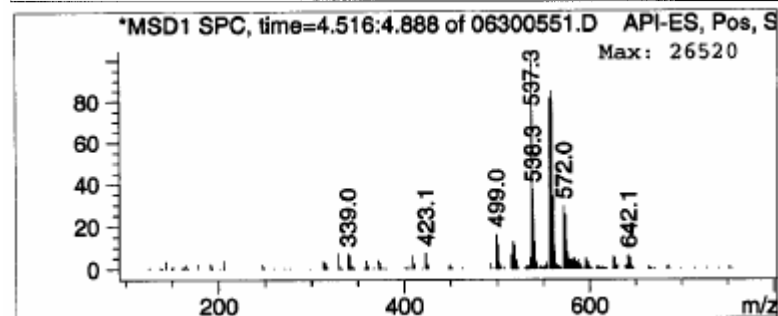



2-(4-Chlorophenyl)-5-ethyl-1-(phenylsulfonyl)-4-(p-tolylthio)pyrrolidine-3-carboxylic acid (A05C29E02)

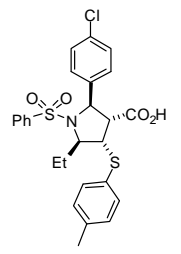

Chemical Formula: C<sub>26</sub>H<sub>26</sub>ClNO<sub>4</sub>S<sub>2</sub>  
 Exact Mass: 515.10  
 Molecular Weight: 516.07

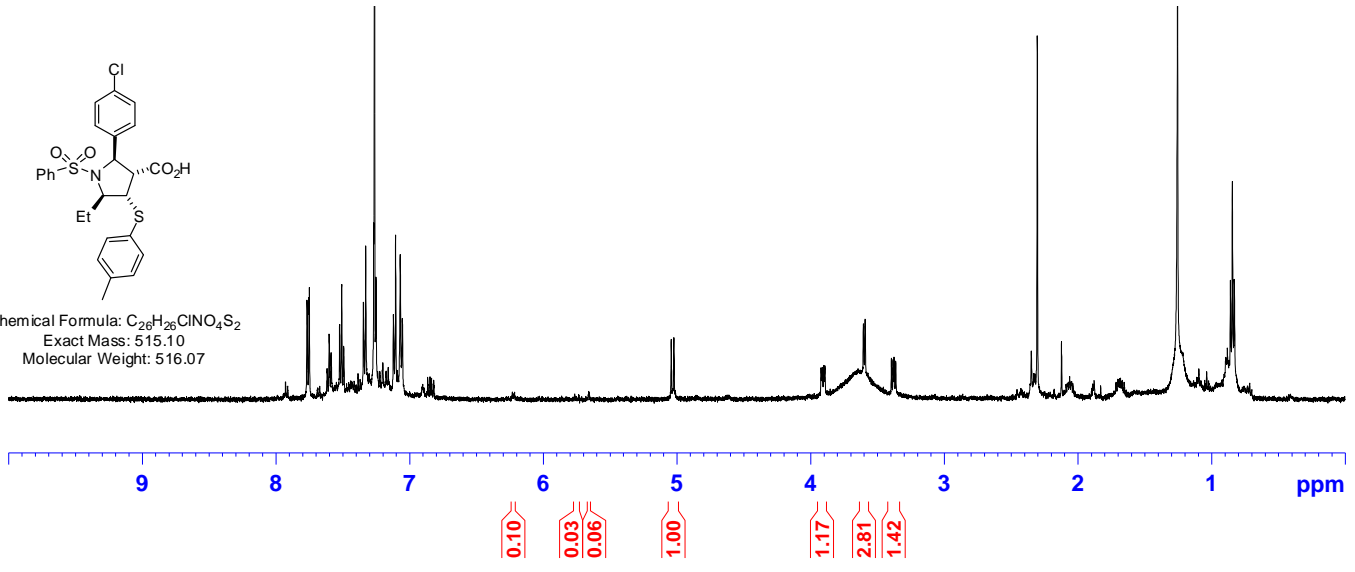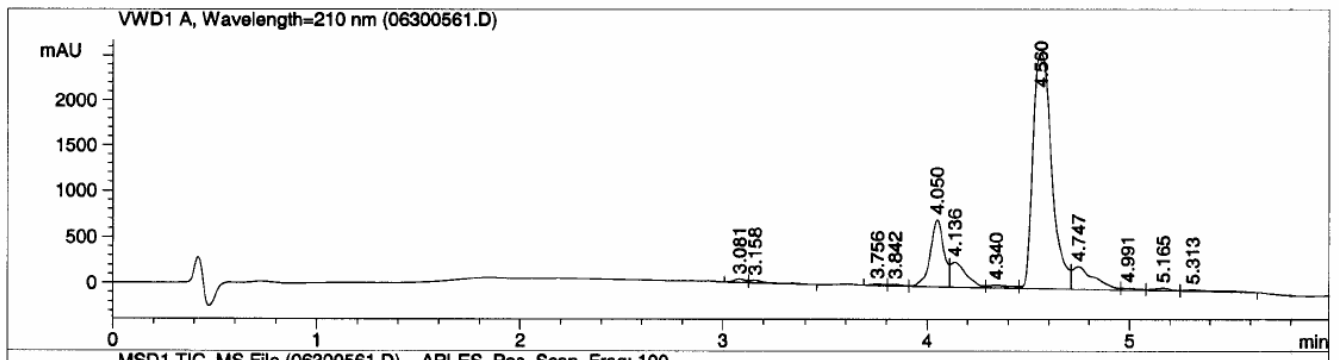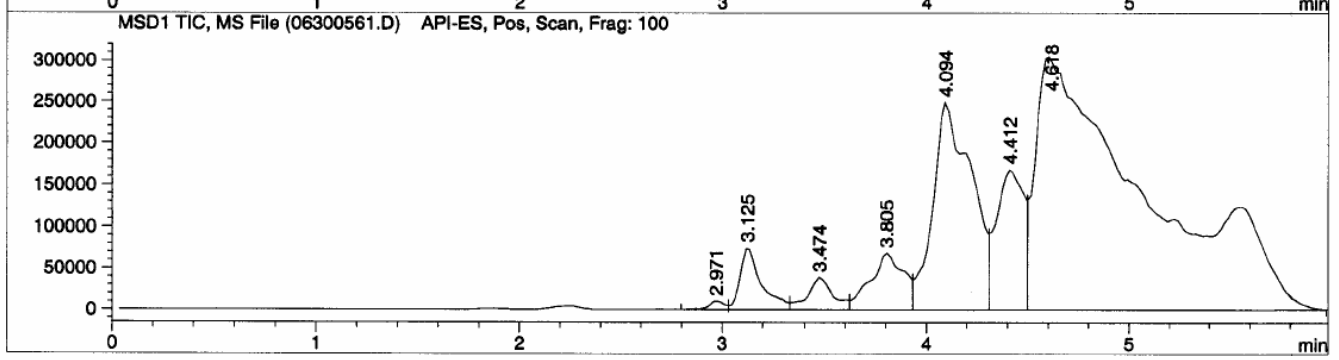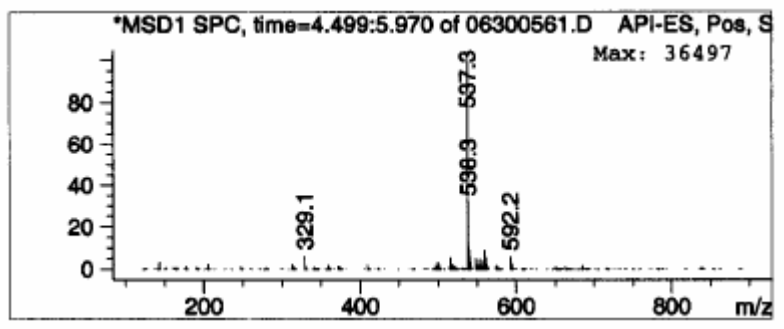

Component 1: Peak at Scan 258.3. Top ions are 538 540 539

1-(4-Chlorophenylsulfonyl)-5-ethyl-2-(*p*-tolyl)-4-(*p*-tolylthio)pyrrolidine-3-carboxylic acid (A05C30E02)

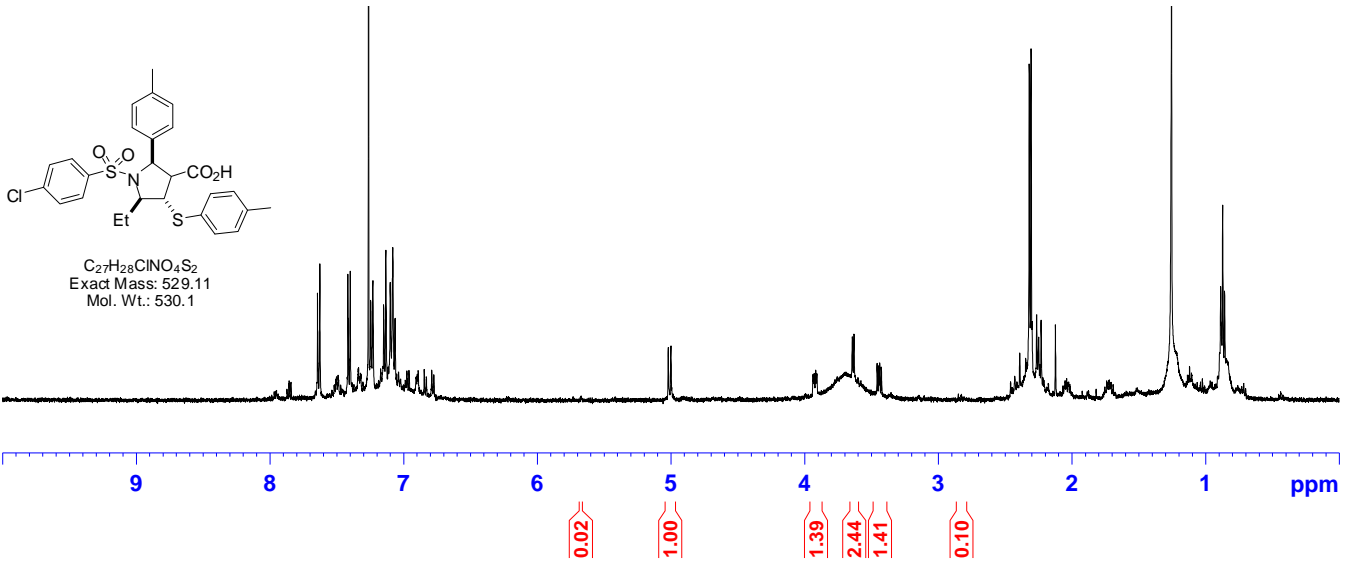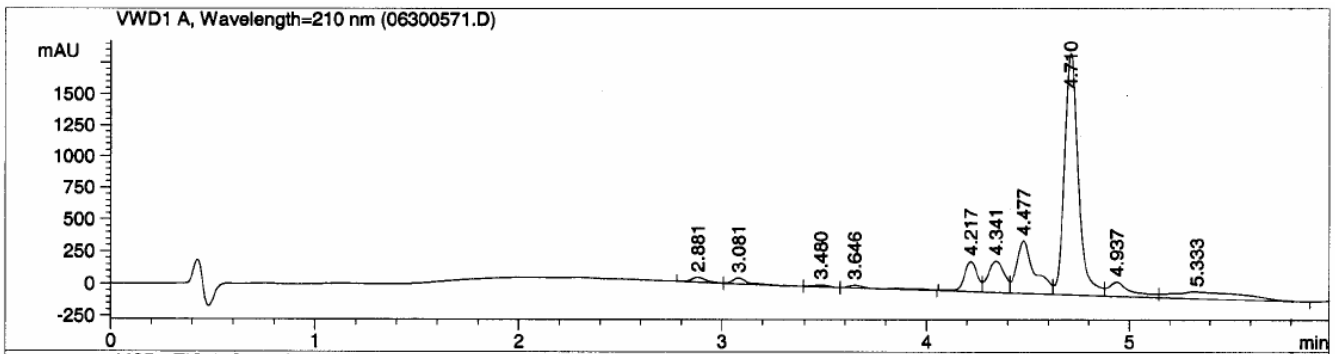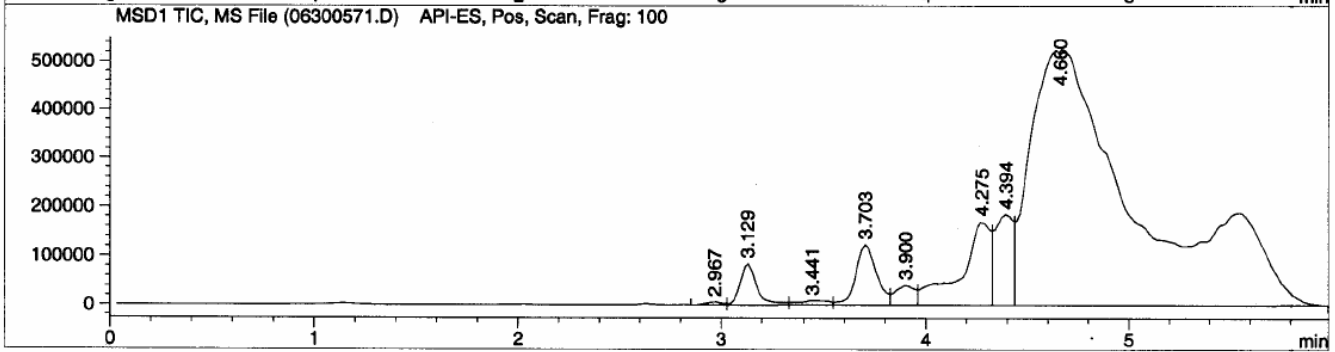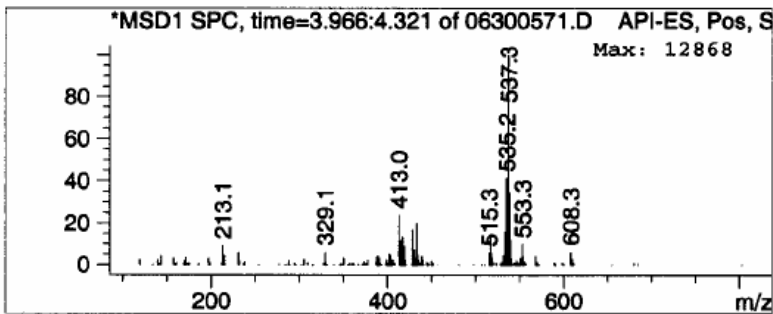

**5-Ethyl-2-(*m*-tolyl)-4-(*p*-tolylthio)-1-tosylpyrrolidine-3-carboxylic acid (A05C33E02)**

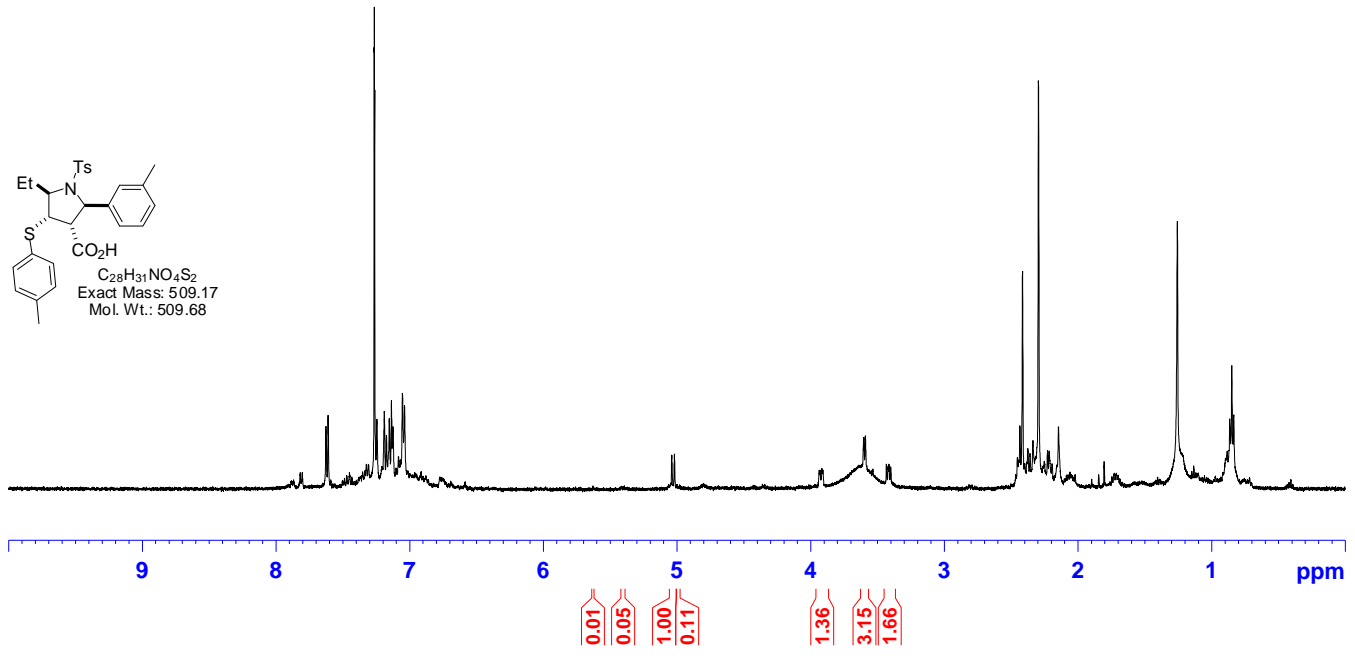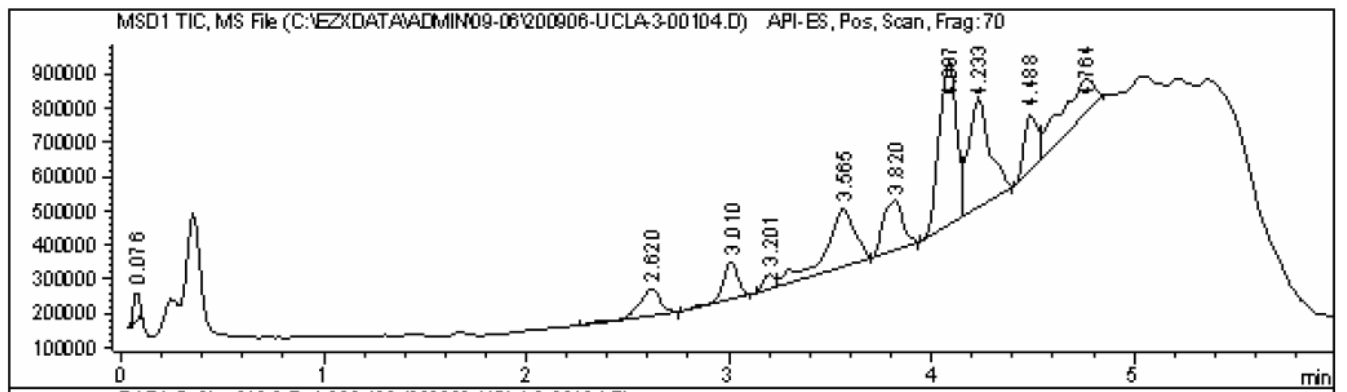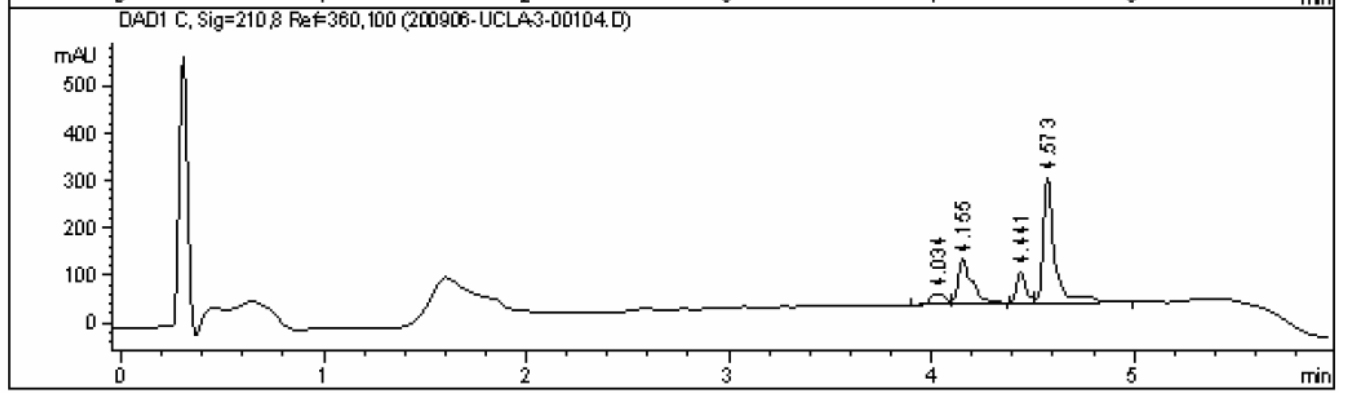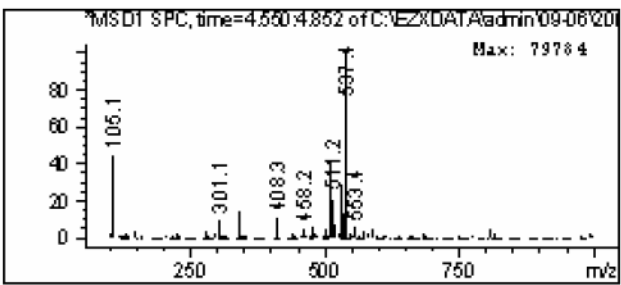

Peak #10 at 4.764 min ( 4.546 to 4.851 min)  
 -> The analysis found only one component, indicating a pure peak. <-  
 Component 1: Peak at Scan 259.7. Top ions are 510 532 511

5-Ethyl-2-(4-methoxyphenyl)-1-(phenylsulfonyl)-4-(p-tolylthio)pyrrolidine-3-carboxylic acid (A05C35E02)

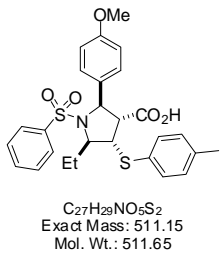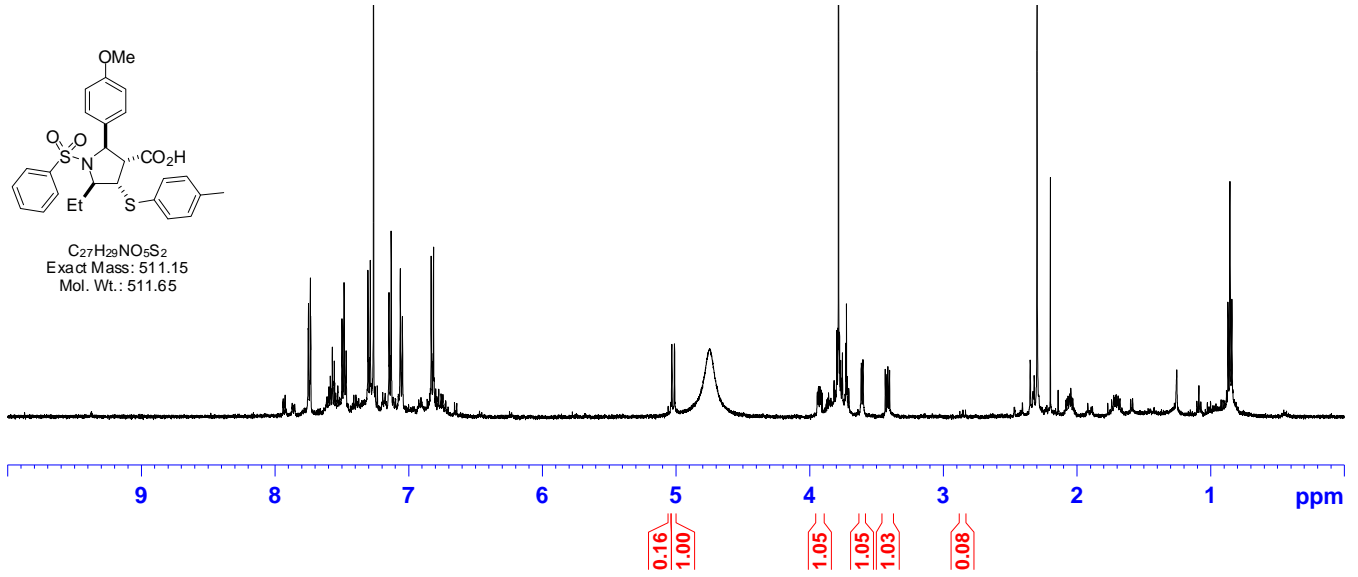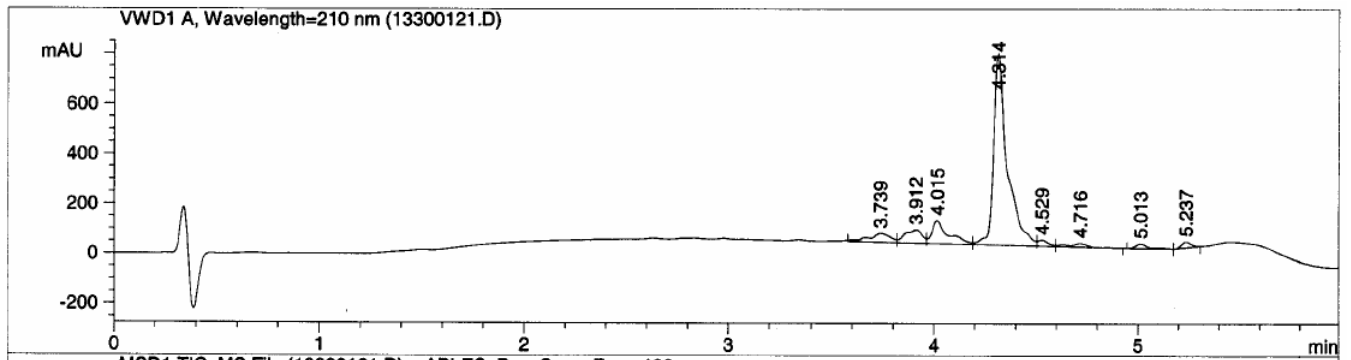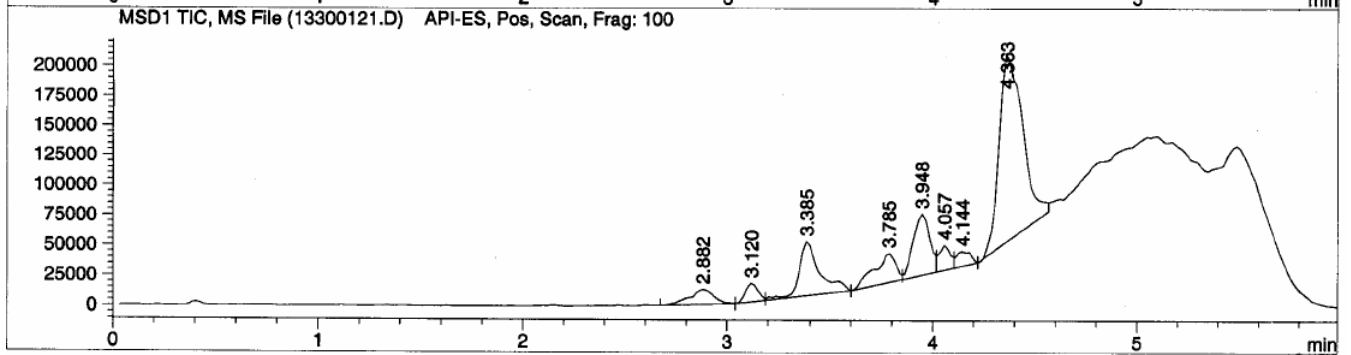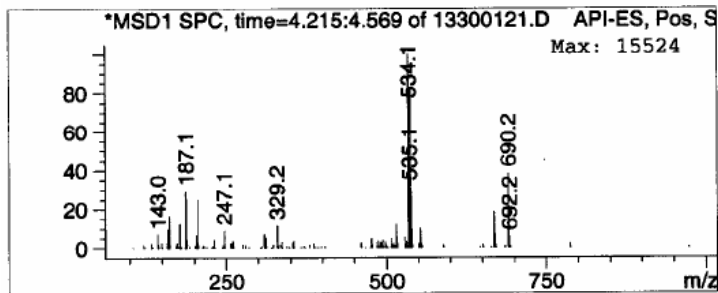

2-(4-Chlorophenyl)-5-ethyl-1-(*o*-tolylsulfonyl)-4-(*p*-tolylthio)pyrrolidine-3-carboxylic acid (A05C40E02)

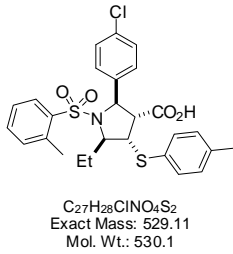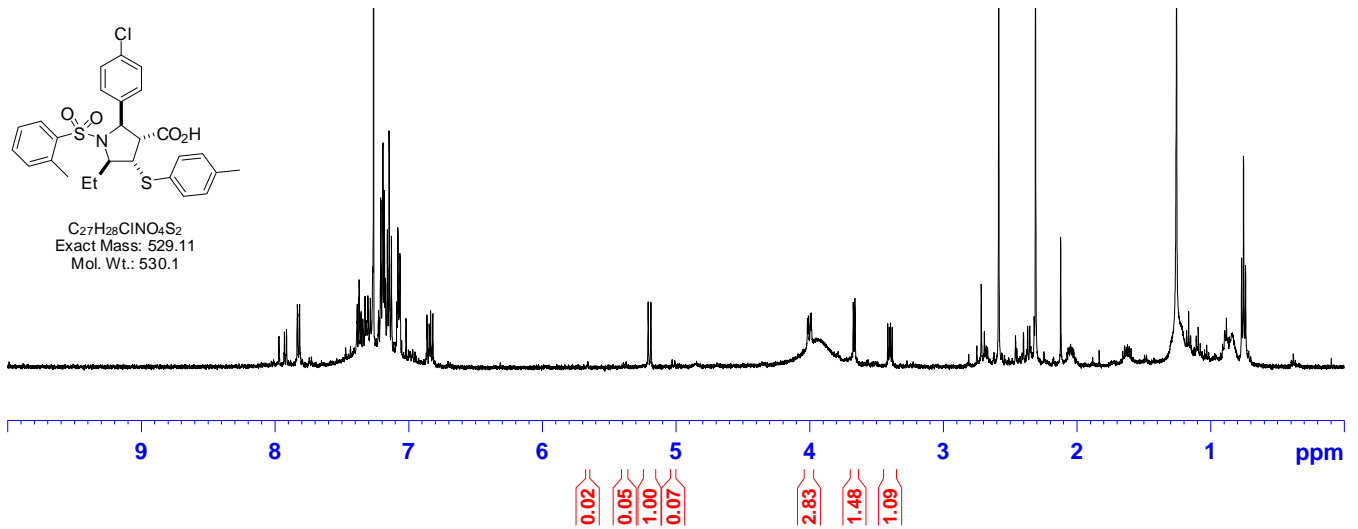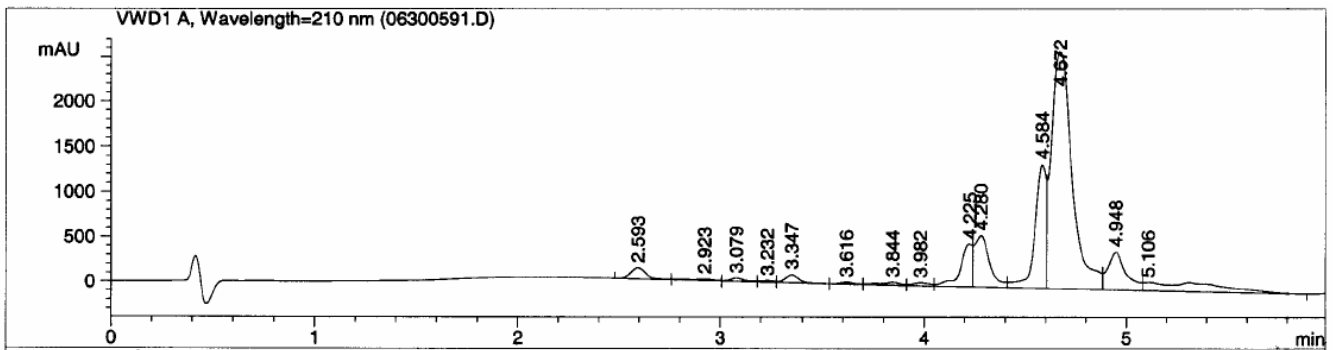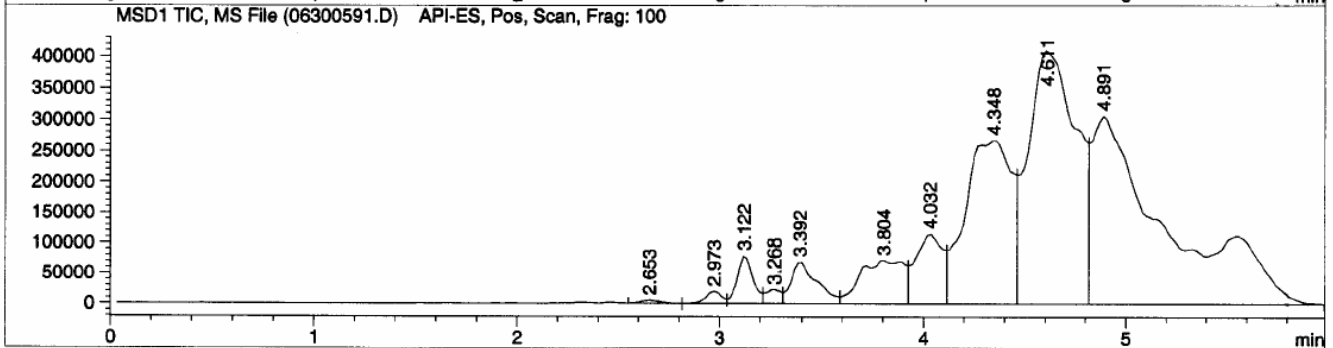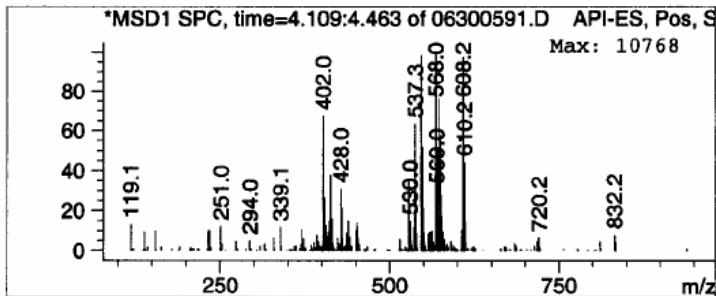

5-Ethyl-2-(*p*-tolyl)-1-(*o*-tolylsulfonyl)-4-(*p*-tolylthio)pyrrolidine-3-carboxylic acid (A05C41E02)

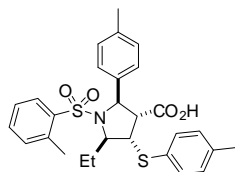

C<sub>28</sub>H<sub>31</sub>NO<sub>4</sub>S<sub>2</sub>  
 Exact Mass: 509.17  
 Mol. Wt.: 509.68

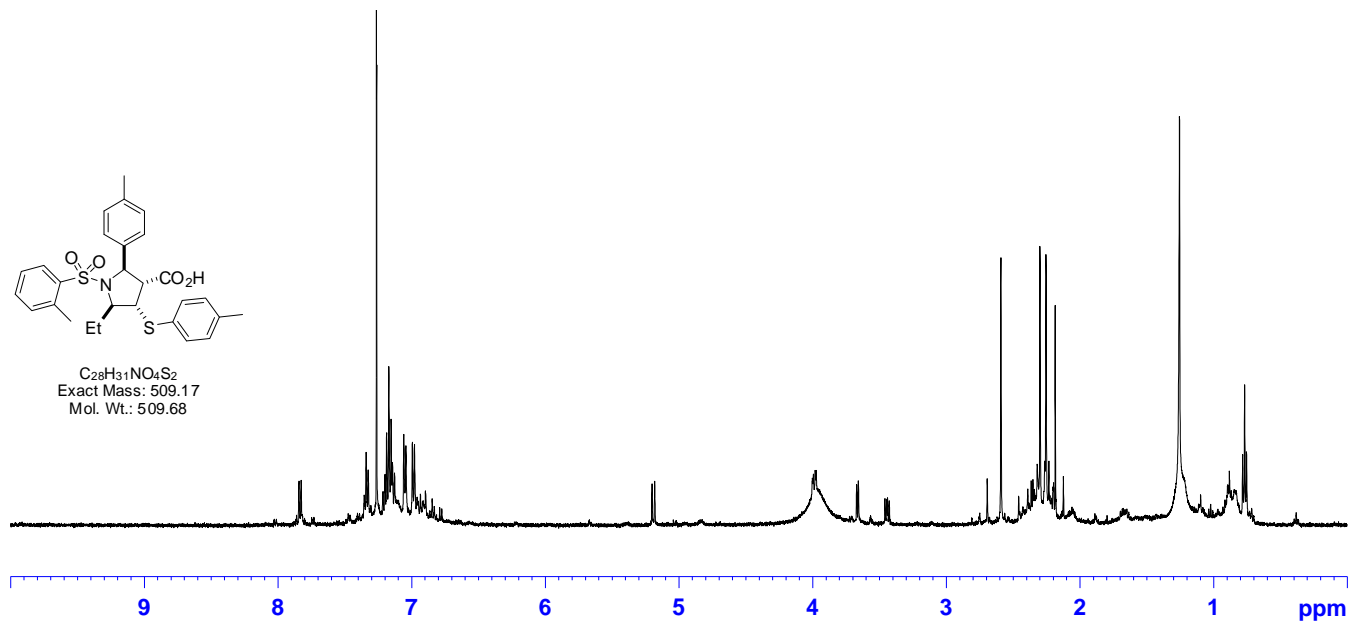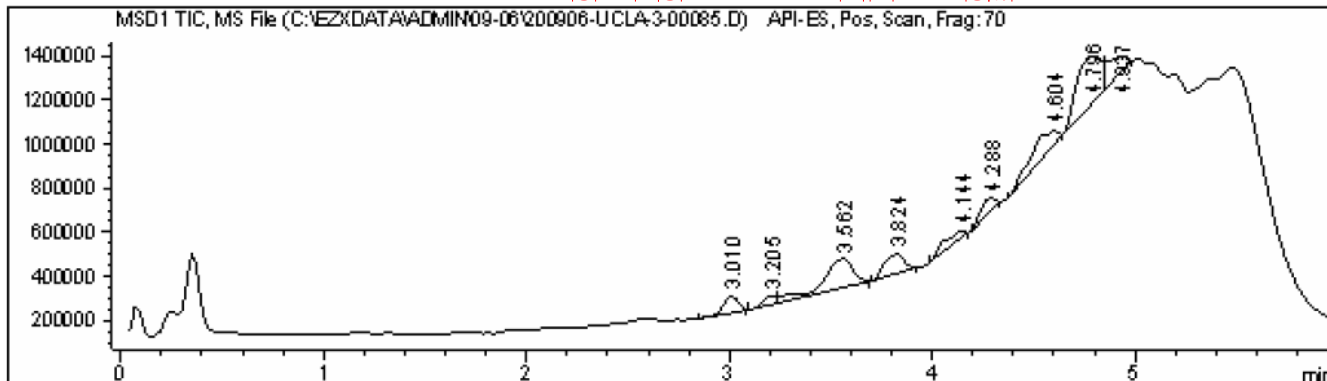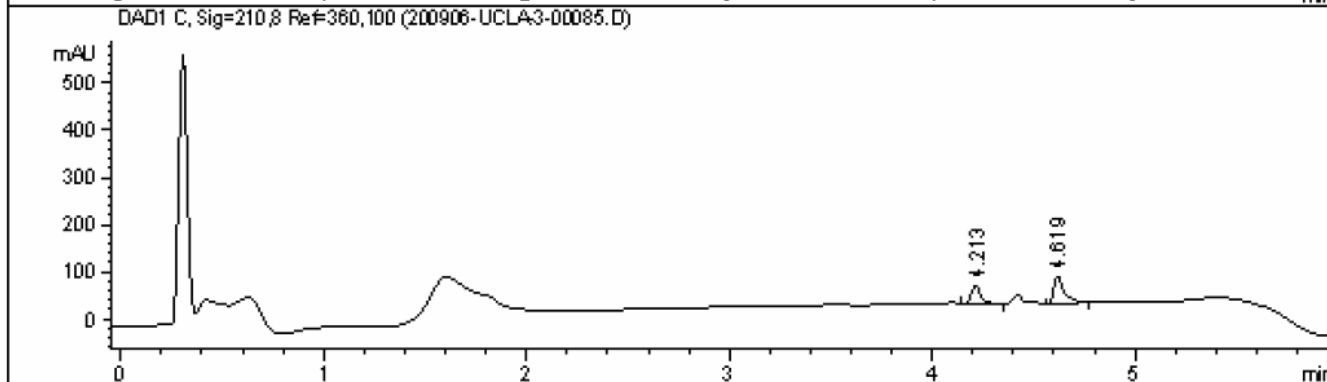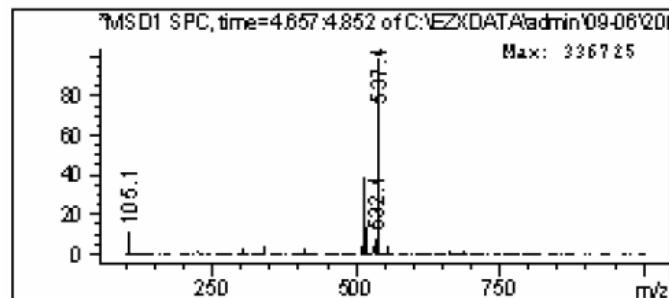

**5-Ethyl-1-(phenylsulfonyl)-2-(*p*-tolyl)-4-(*p*-tolylthio)pyrrolidine-3-carboxylic acid (A05C43E02)**

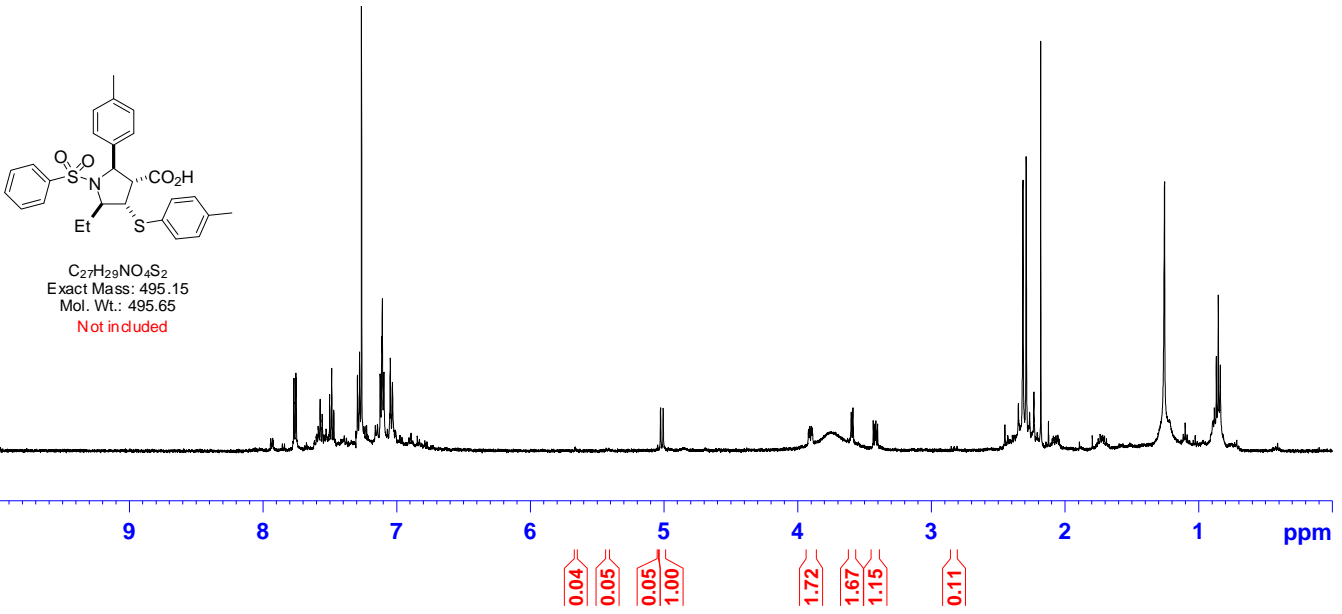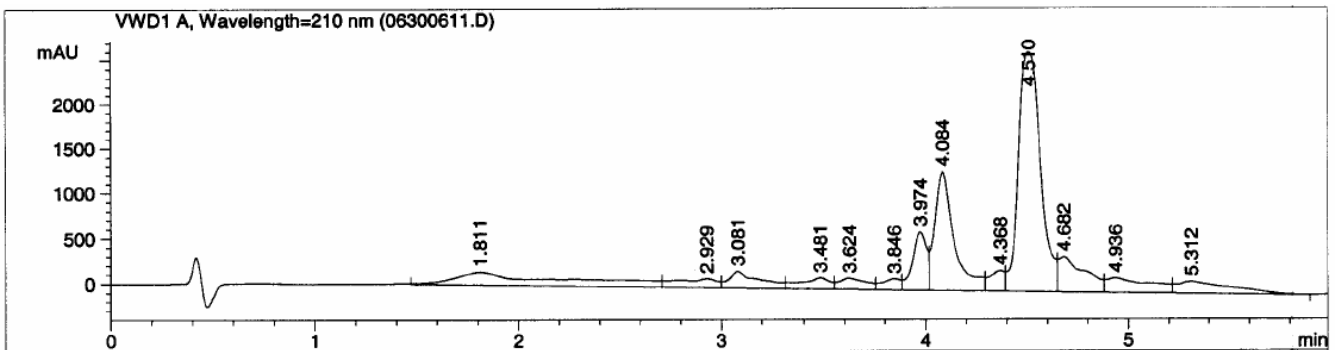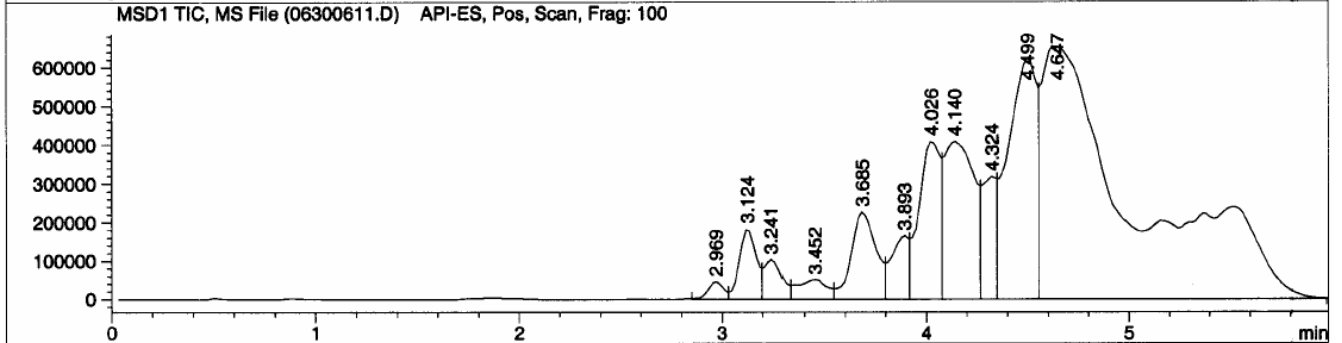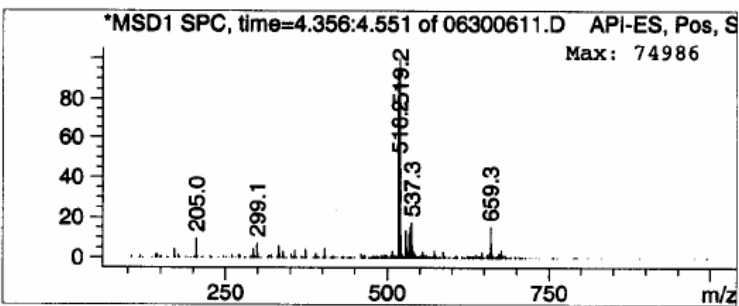

5-Ethyl-1-(methylsulfonyl)-2-(*p*-tolyl)-4-(*p*-tolylthio)pyrrolidine-3-carboxylic acid (A05C46E02)

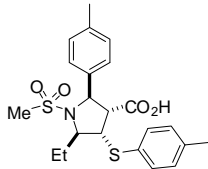

C<sub>22</sub>H<sub>27</sub>NO<sub>4</sub>S<sub>2</sub>  
 Exact Mass: 433.14  
 Mol. Wt.: 433.58  
 Not included

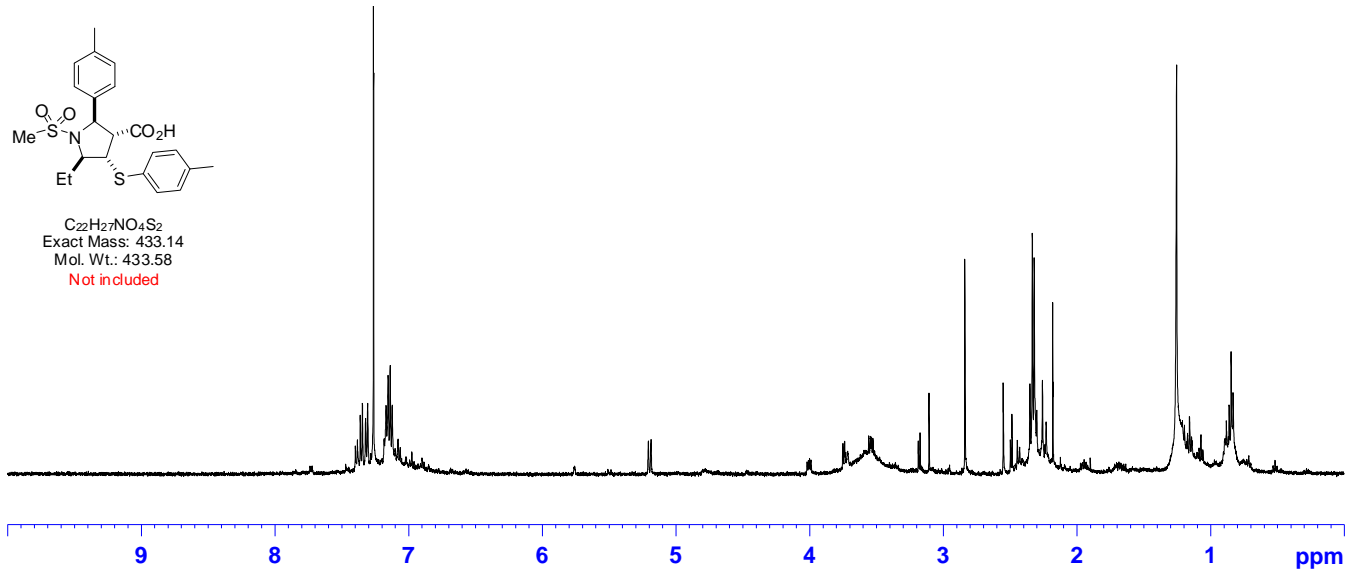

0.15 0.07 1.00 0.76 2.33 2.89

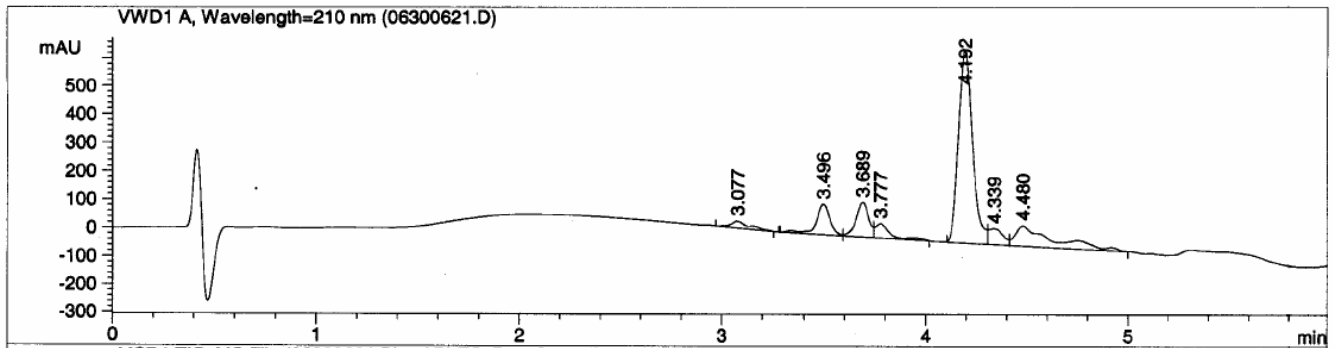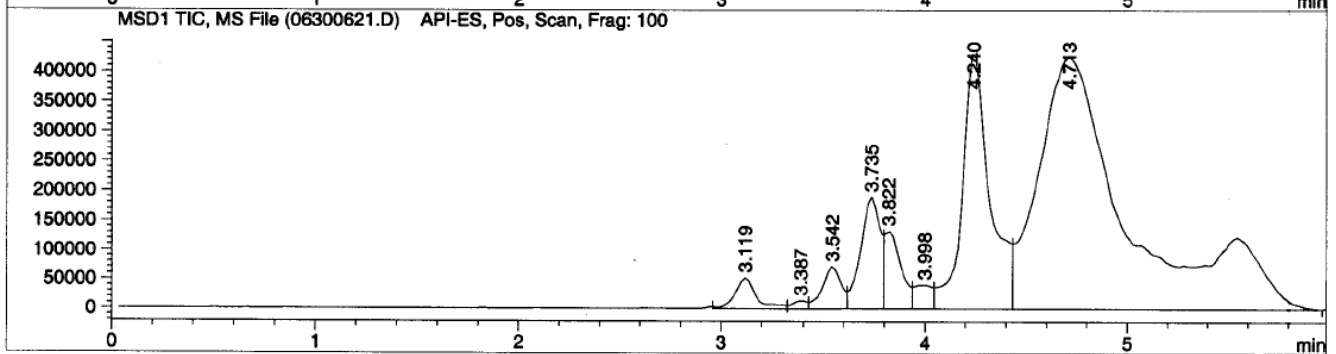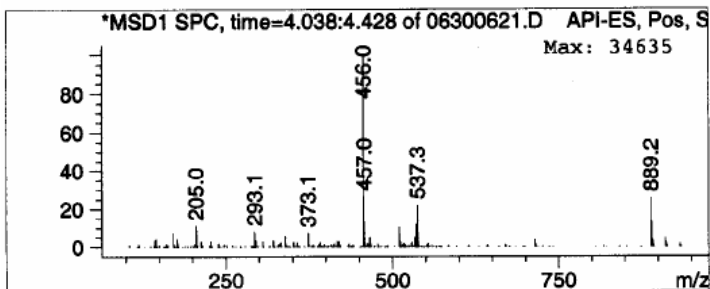



# Spectral Data for Table 11

## 5-Ethyl-4-(phenylthio)-2-(*p*-tolyl)-1-tosylpyrrolidine-3-carboxylic acid (A05C02E01)

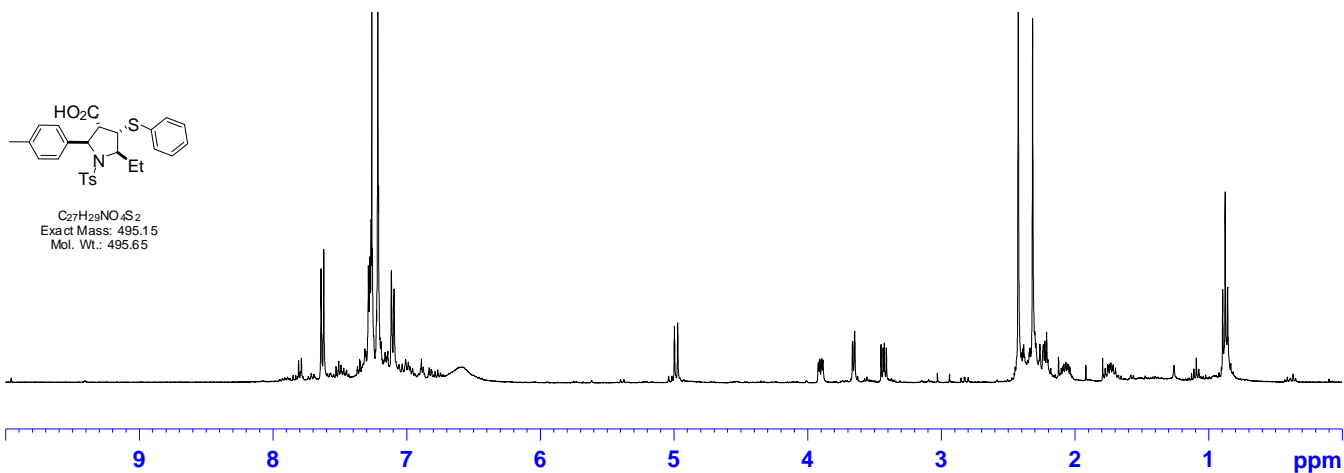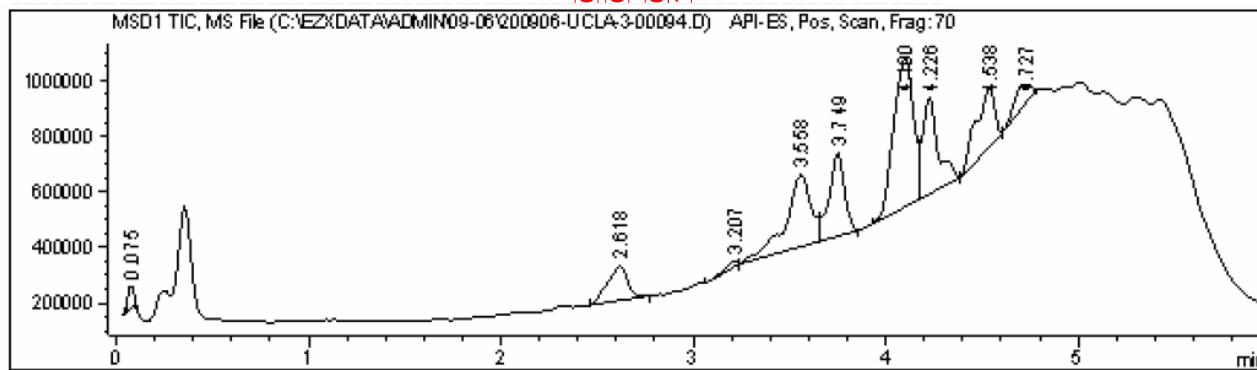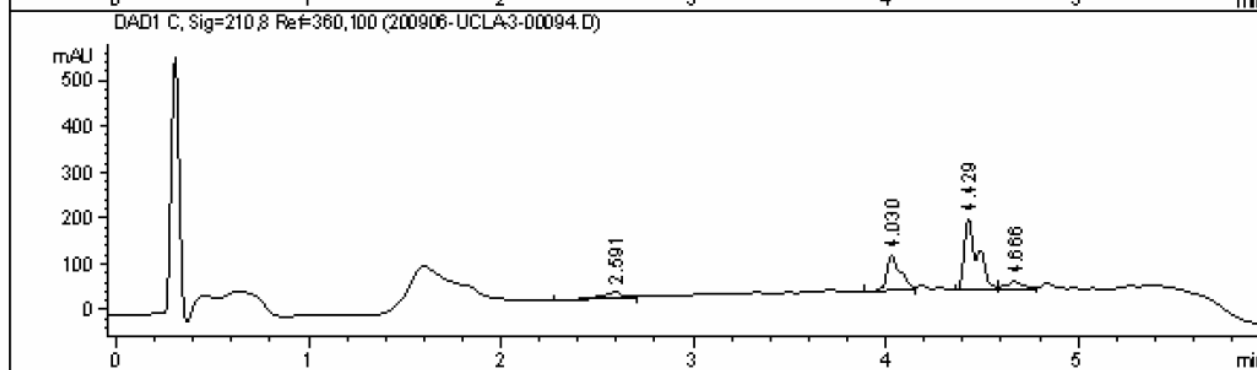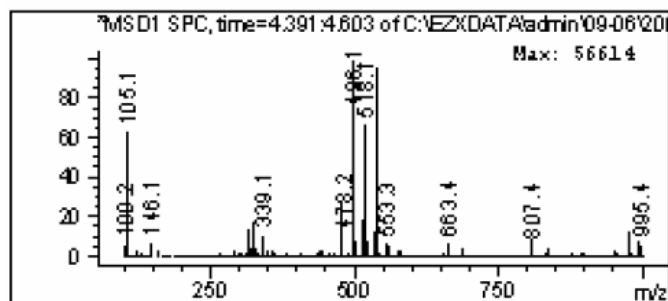

5-Ethyl-2-(p-tolyl)-4-(p-tolylthio)-1-tosylpyrrolidine-3-carboxylic acid (A05C02E02)

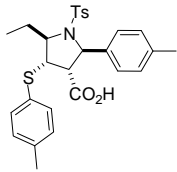

C<sub>28</sub>H<sub>31</sub>NO<sub>4</sub>S<sub>2</sub>  
 Exact Mass: 509.17  
 Mol. Wt.: 509.68

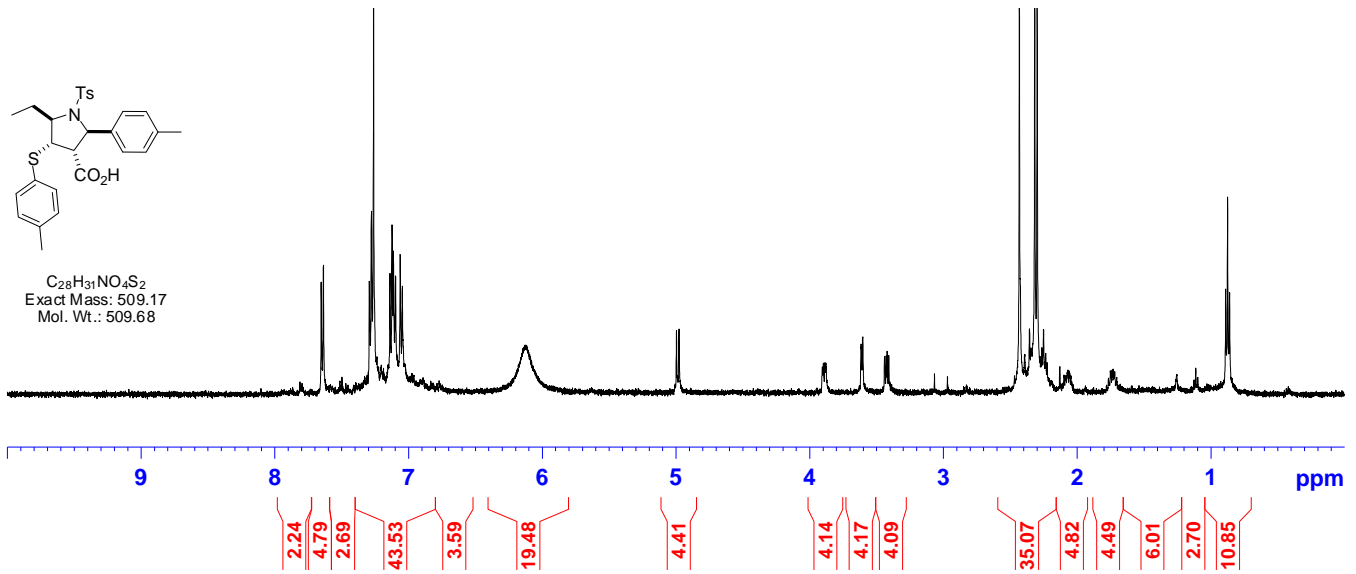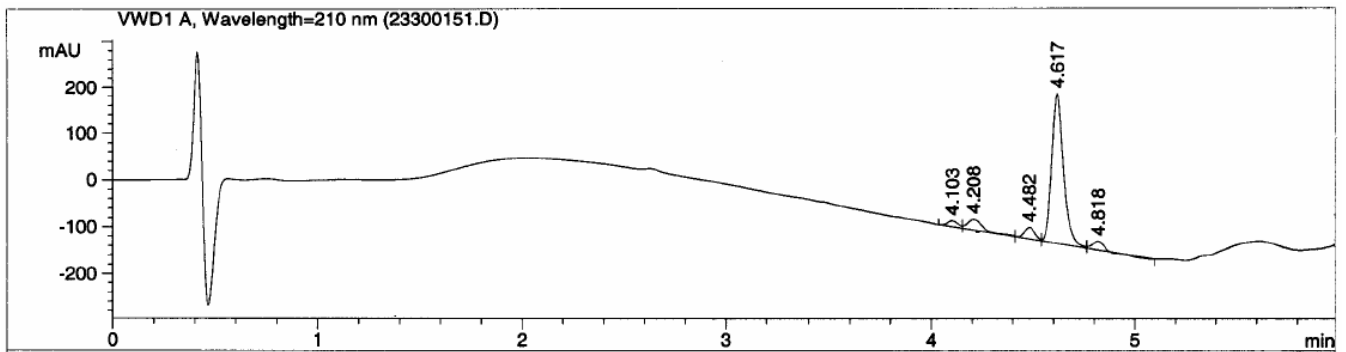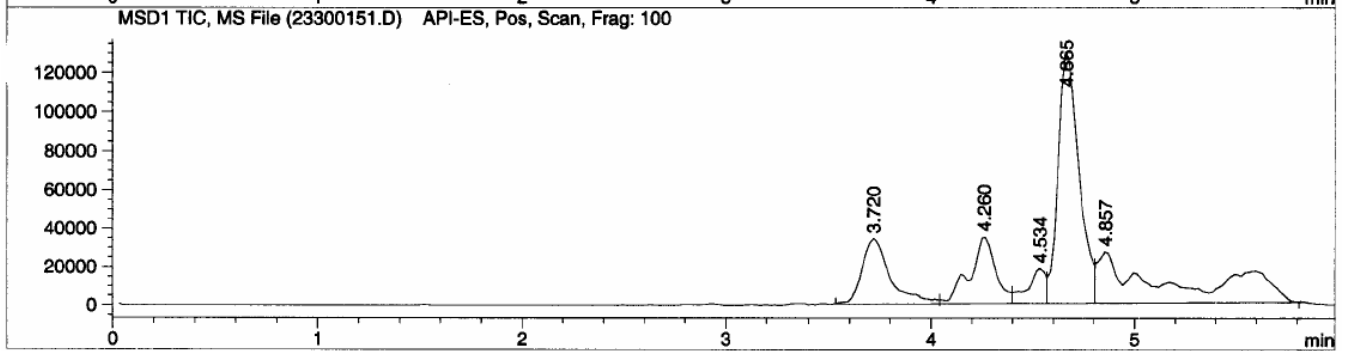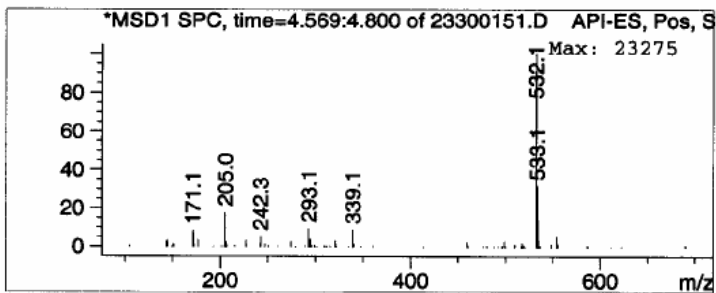

4-(3,4-Dimethylphenylthio)-5-ethyl-2-(*p*-tolyl)-1-tosylpyrrolidine-3-carboxylic acid (A05C02E03)

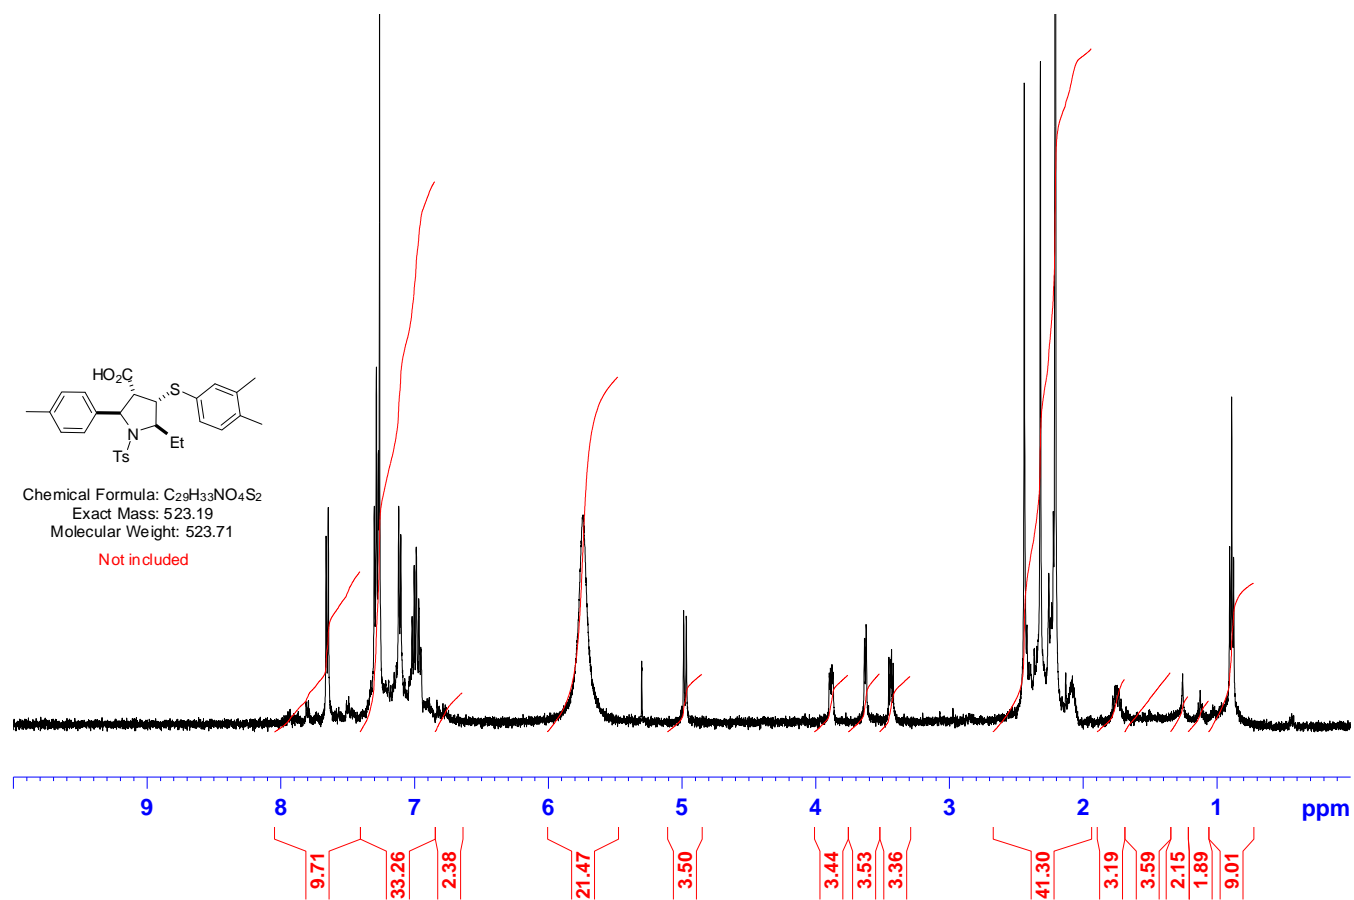

**5-Ethyl-4-(4-methoxyphenylthio)-2-(*p*-tolyl)-1-tosylpyrrolidine-3-carboxylic acid (A05C02E04)**

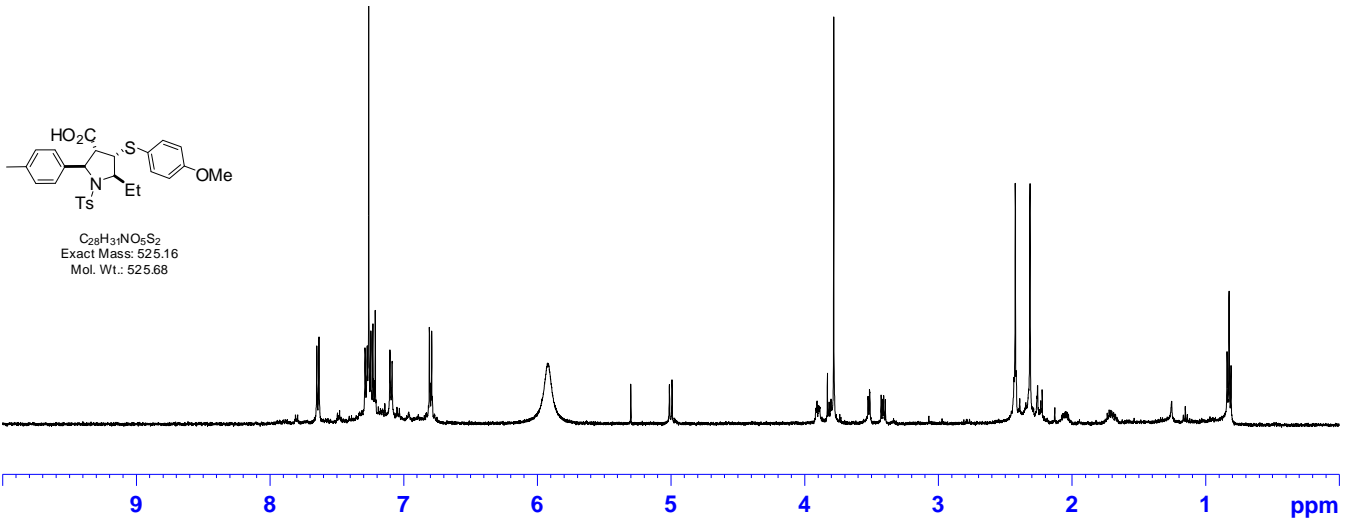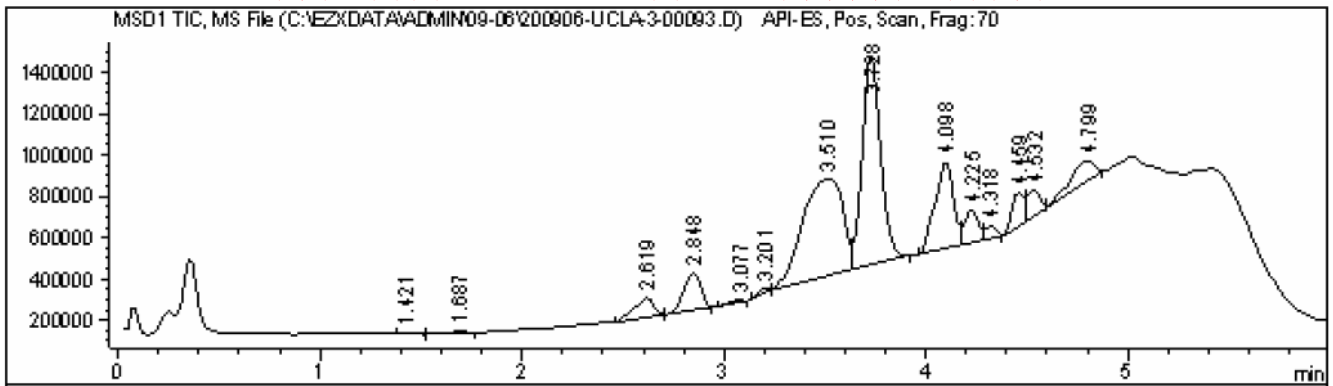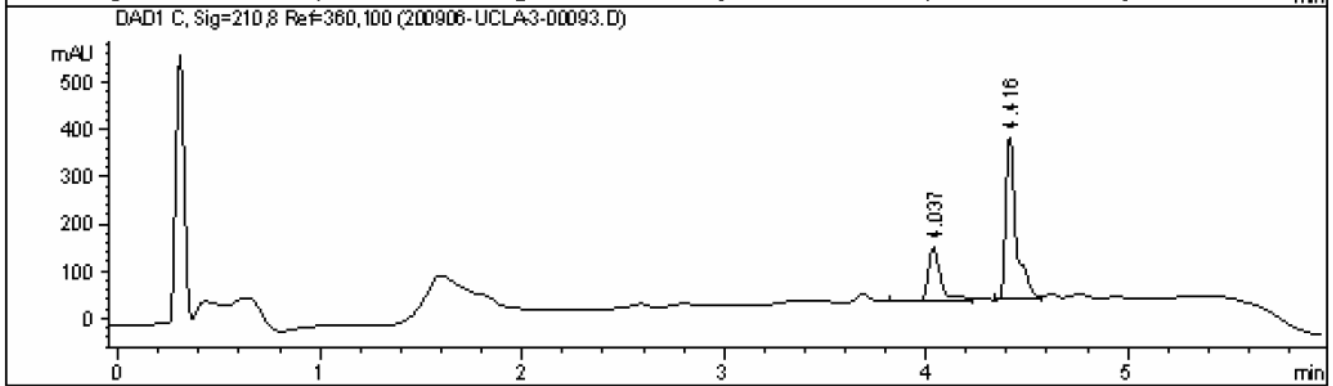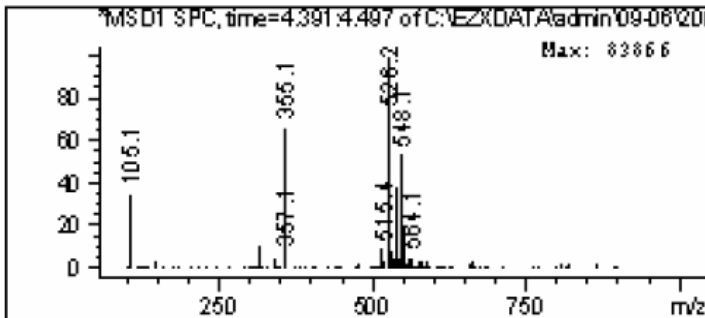

4-(4-Chlorophenylthio)-5-ethyl-2-(*p*-tolyl)-1-tosylpyrrolidine-3-carboxylic acid (A05C02E05)

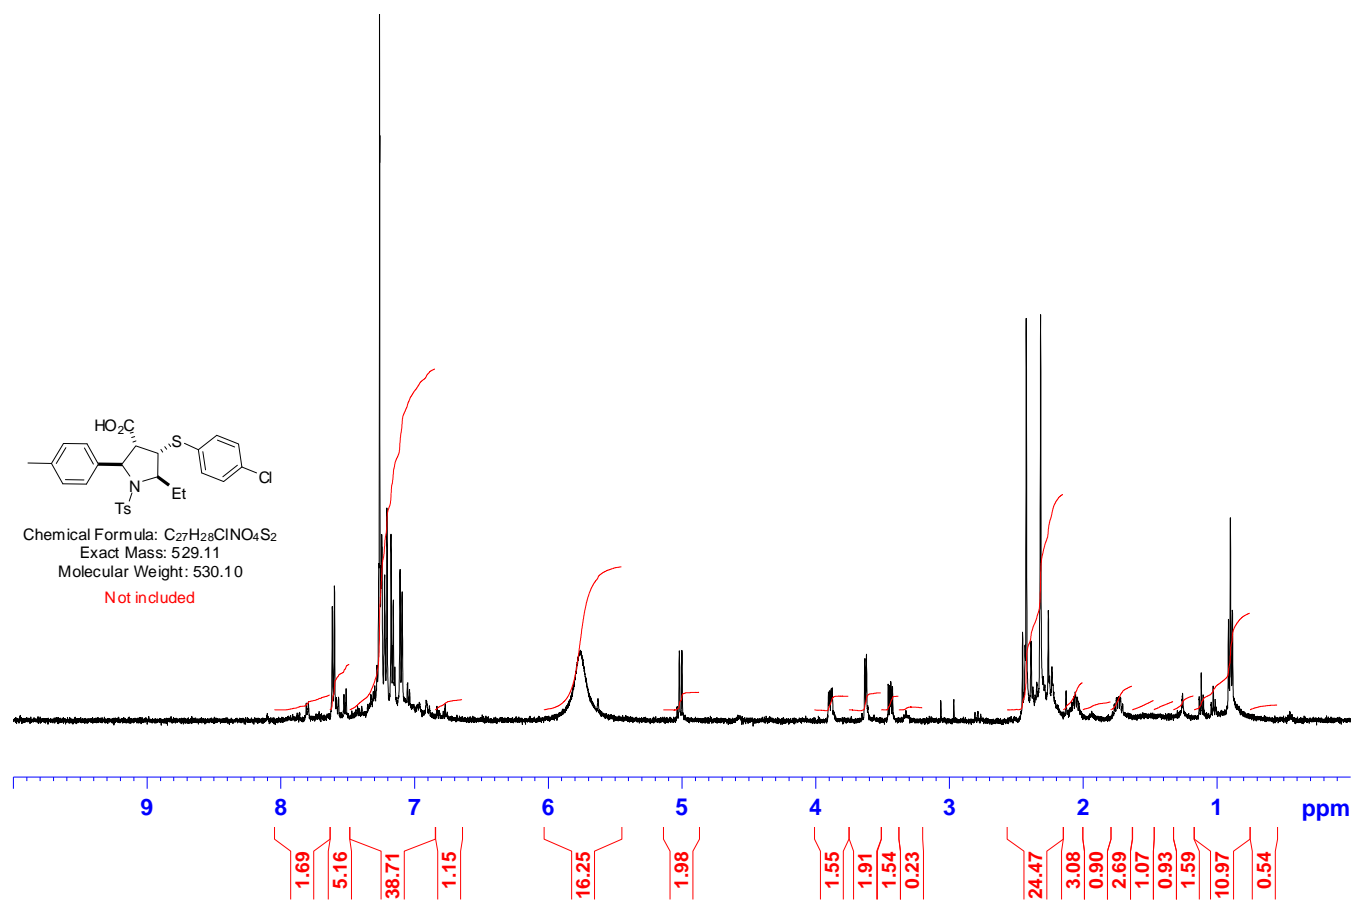

**4-(Benzylthio)-5-ethyl-2-(p-tolyl)-1-tosylpyrrolidine-3-carboxylic acid (A05C02E06)**

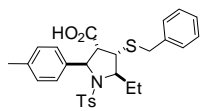

C<sub>28</sub>H<sub>31</sub>NO<sub>4</sub>S<sub>2</sub>  
 Exact Mass: 509.17  
 Mol. Wt.: 509.68

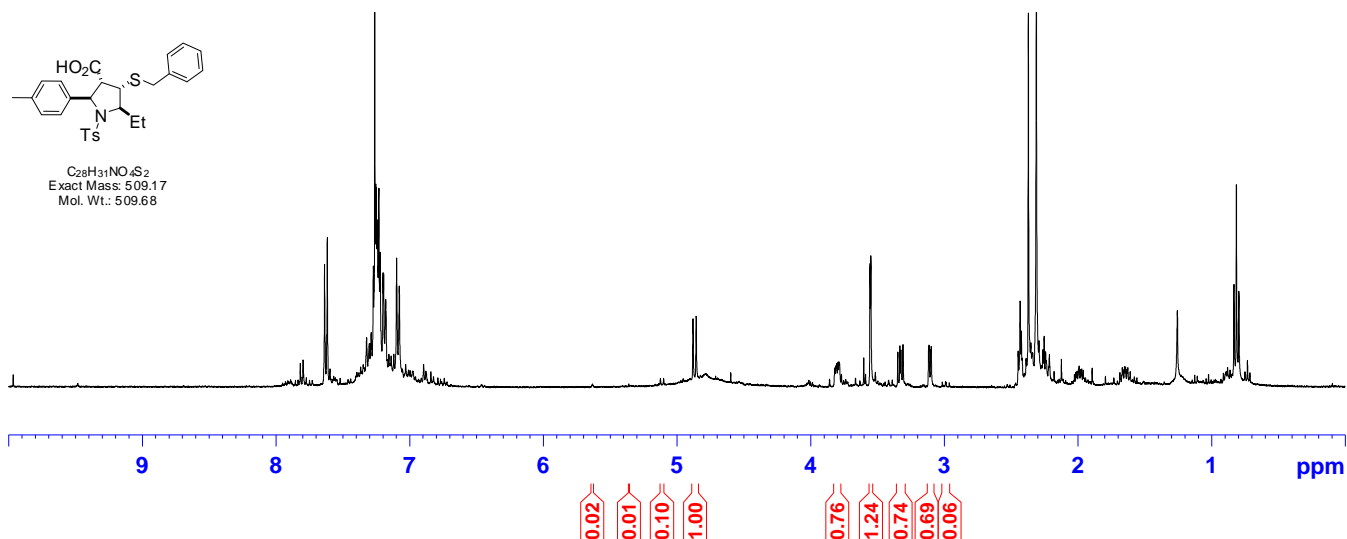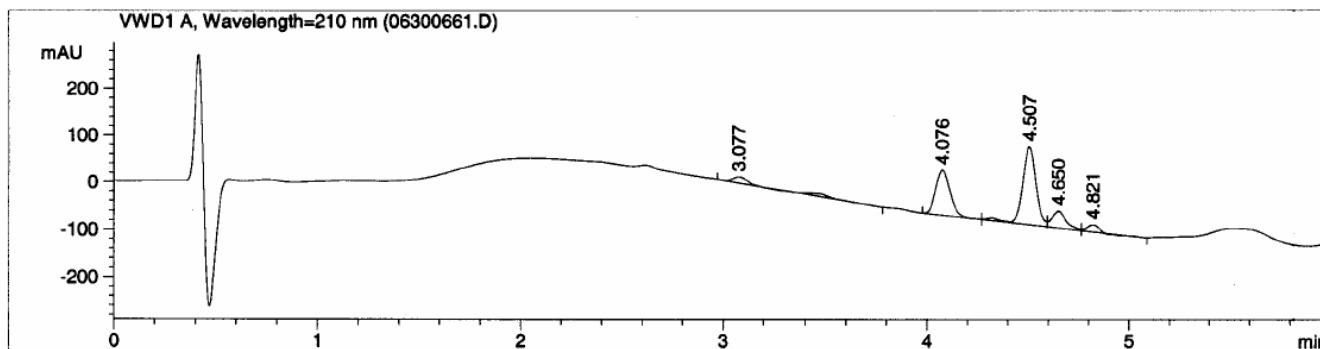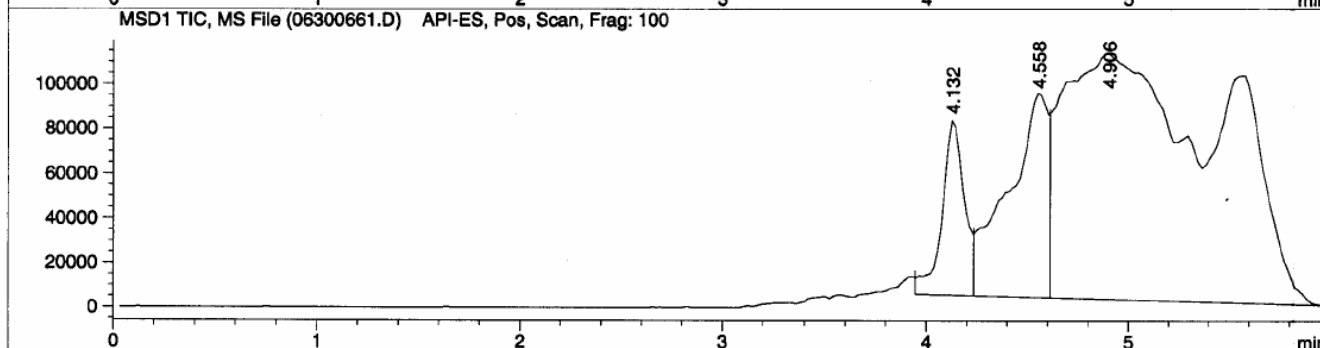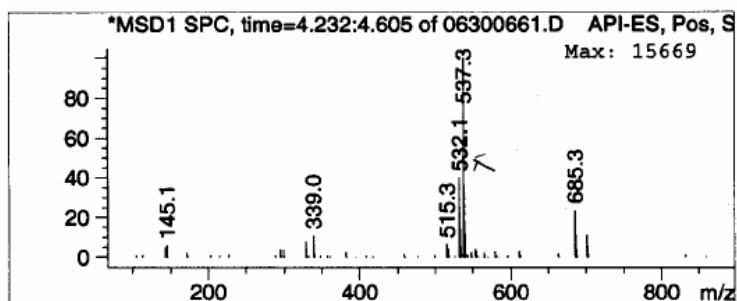

4-(4-Tert-butylbenzylthio)-5-ethyl-2-(p-tolyl)-1-tosylpyrrolidine-3-carboxylic acid (A05C02E07)

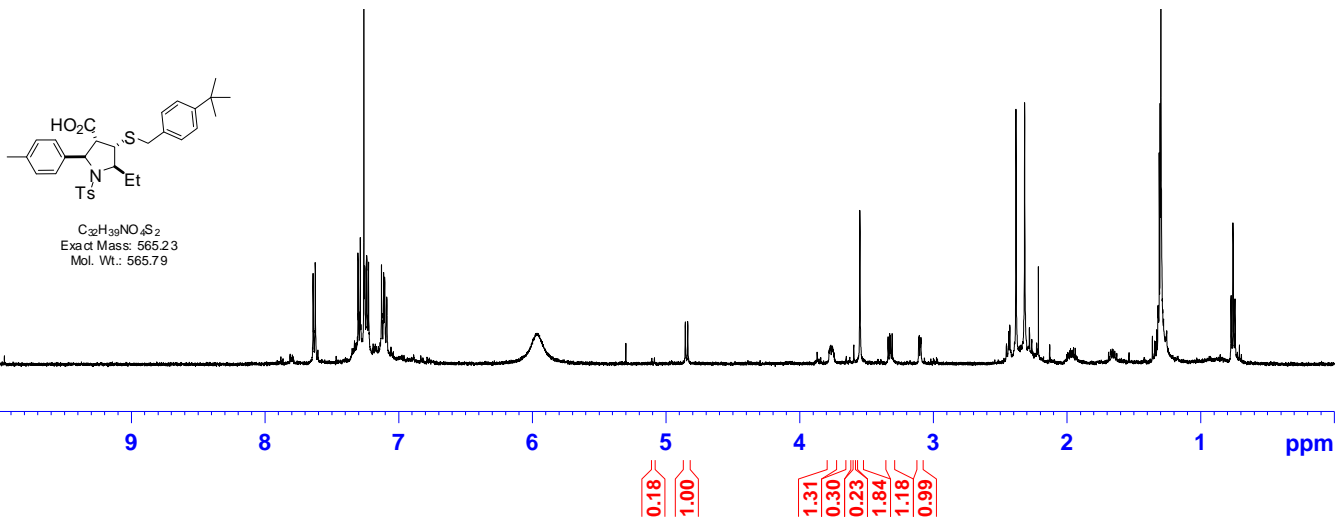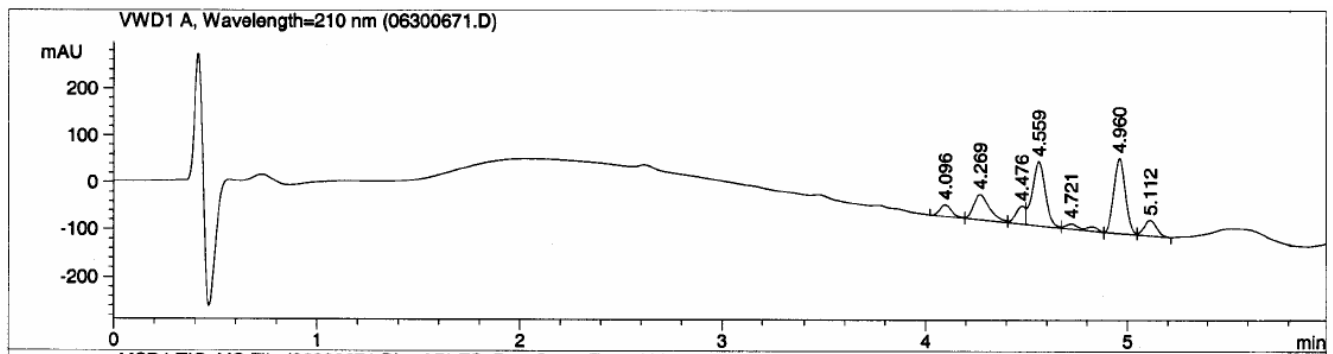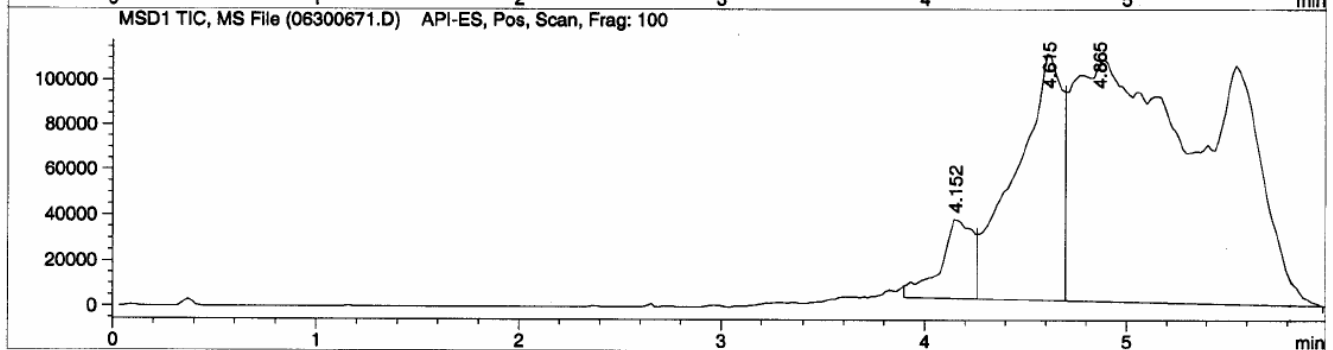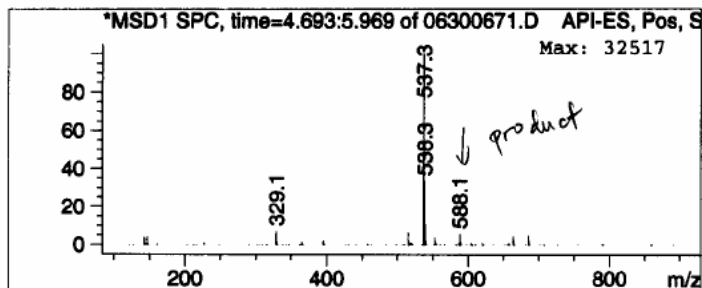

4-(4-Chlorobenzylthio)-5-ethyl-2-(*p*-tolyl)-1-tosylpyrrolidine-3-carboxylic acid (A05C02E09)

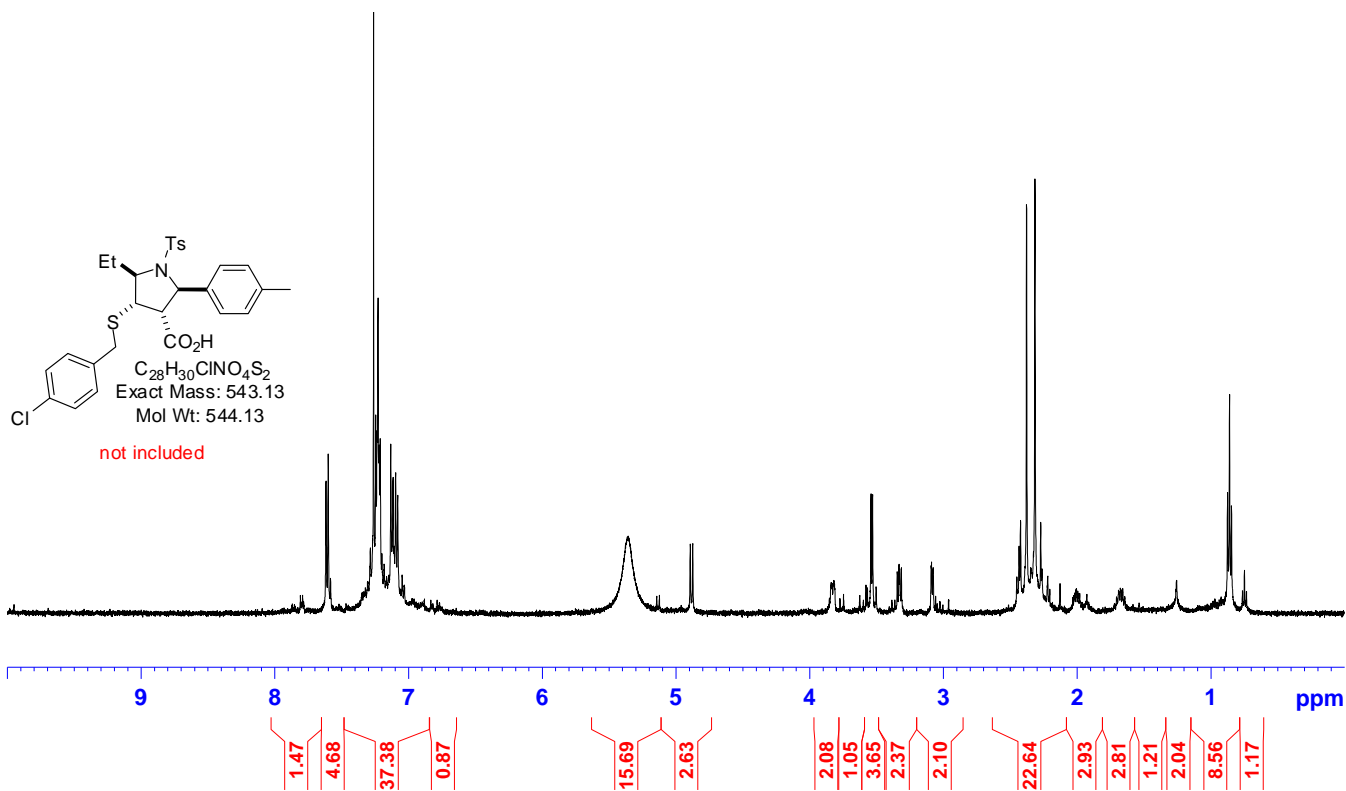



# 5-Ethyl-4-(phenethylthio)-2-p-tolyl-1-tosylpyrrolidine-3-carboxylic acid (A05C02E15)

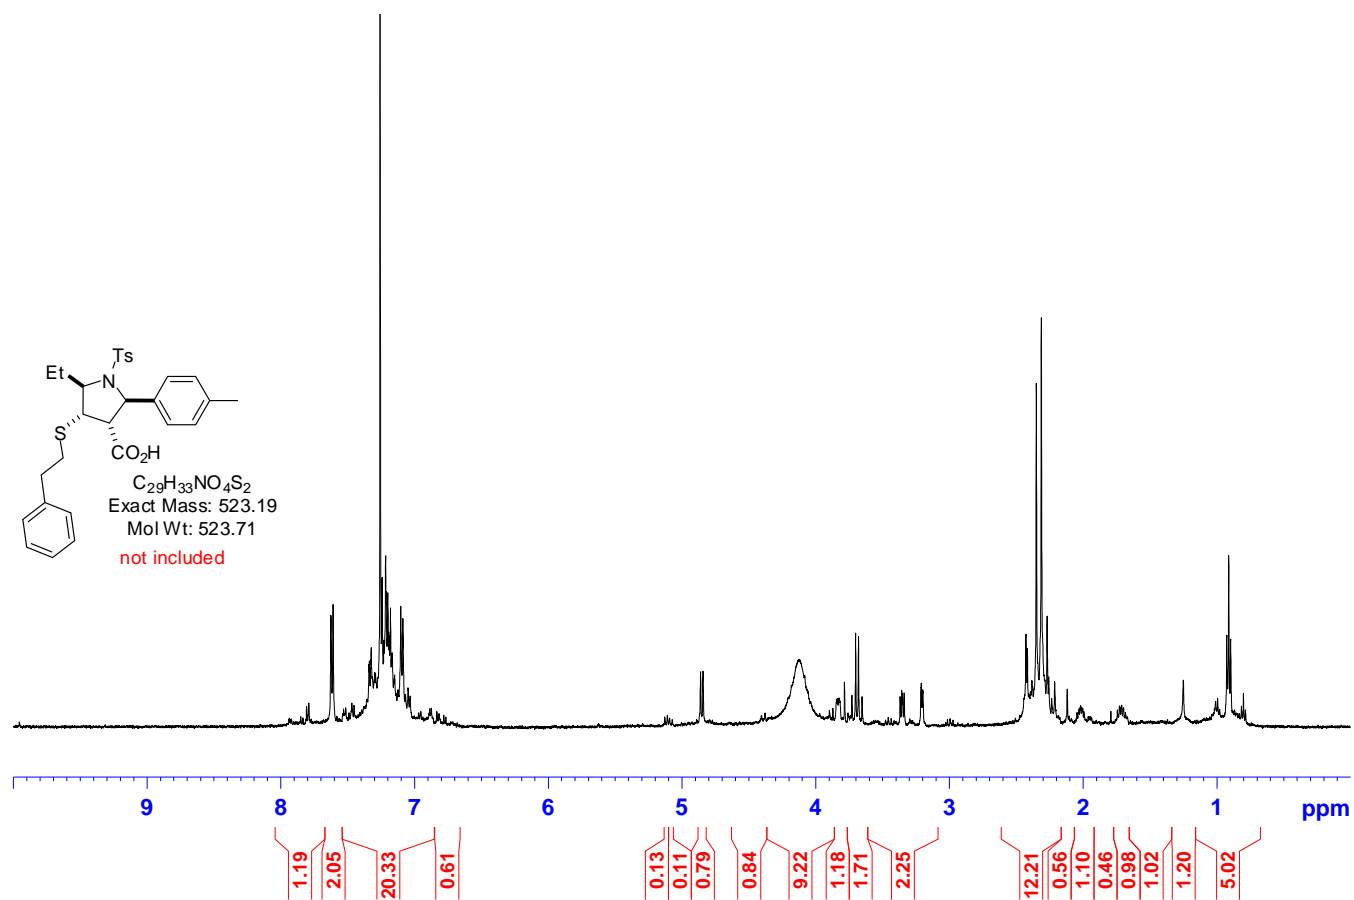

5-Ethyl-4-(ethylthio)-2-(*p*-tolyl)-1-tosylpyrrolidine-3-carboxylic acid (A05C02E16)

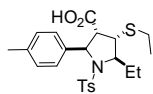

C<sub>23</sub>H<sub>29</sub>NO<sub>4</sub>S<sub>2</sub>  
 Exact Mass: 447.15  
 Mol. Wt.: 447.61

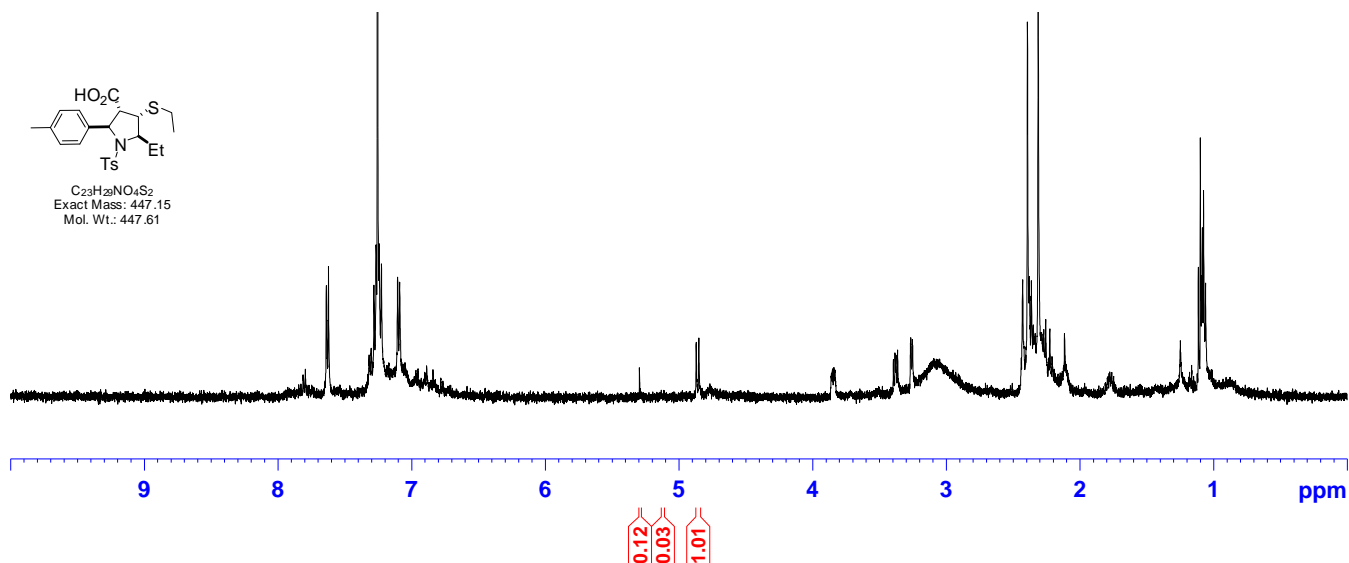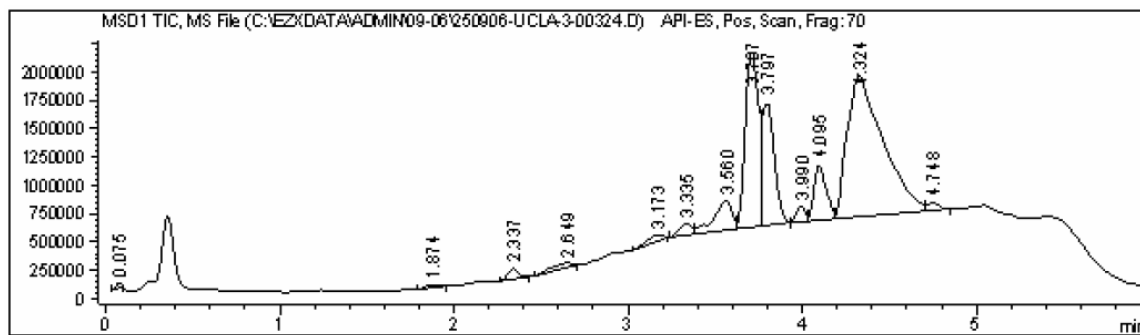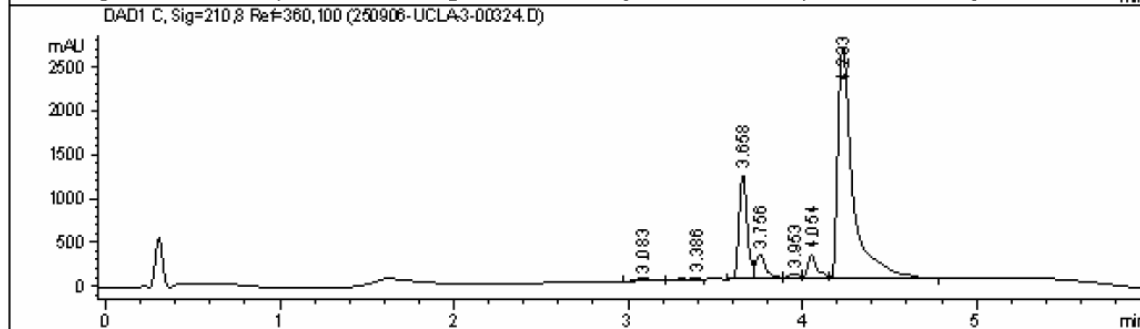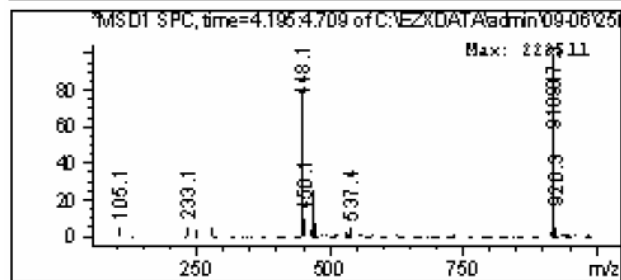

5-Ethyl-4-(isopropylthio)-2-(p-tolyl)-1-tosylpyrrolidine-3-carboxylic acid (A05C02E17)

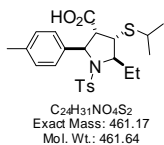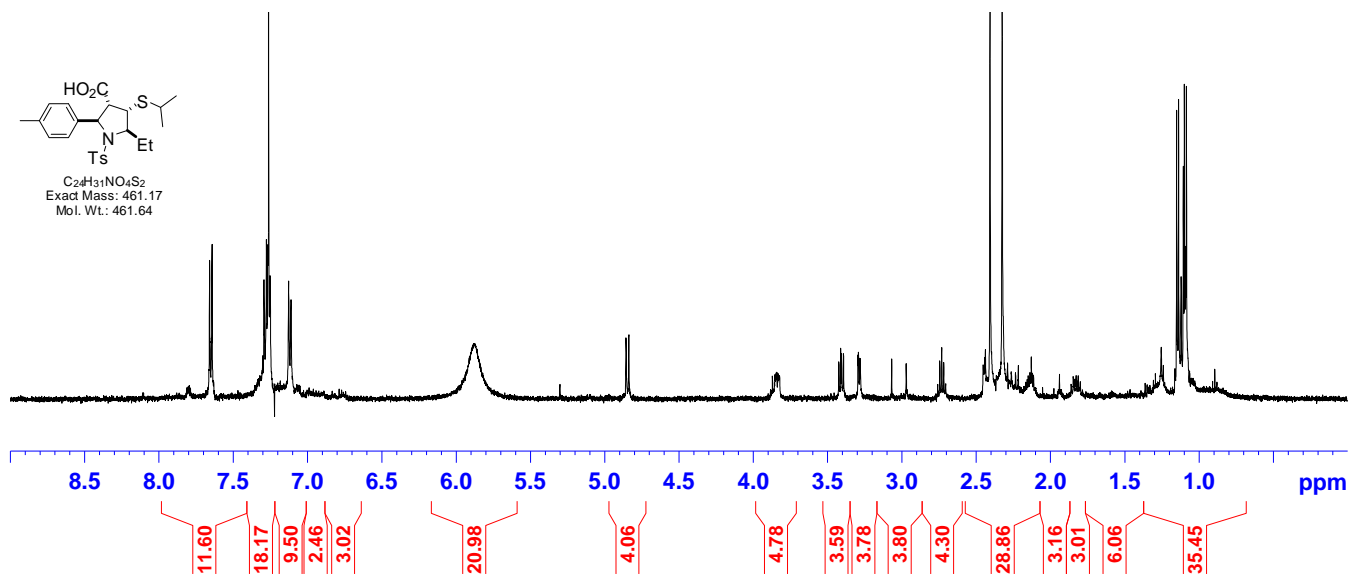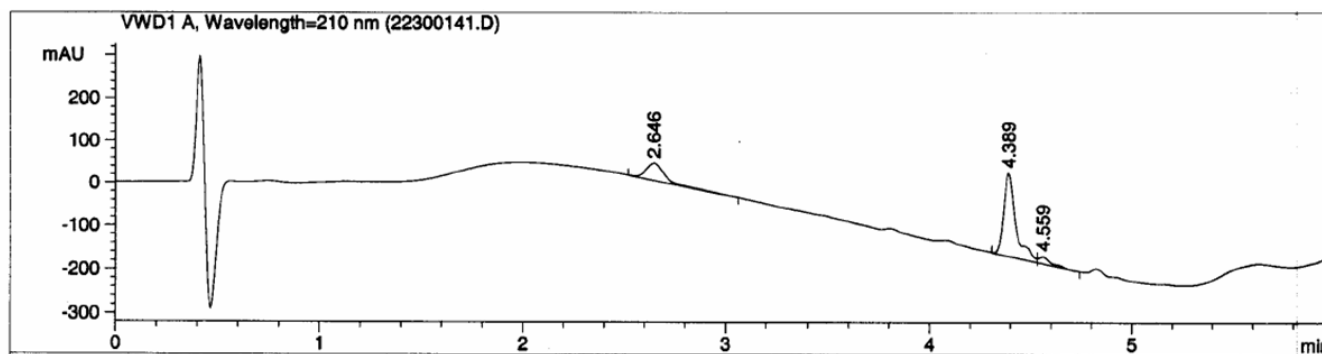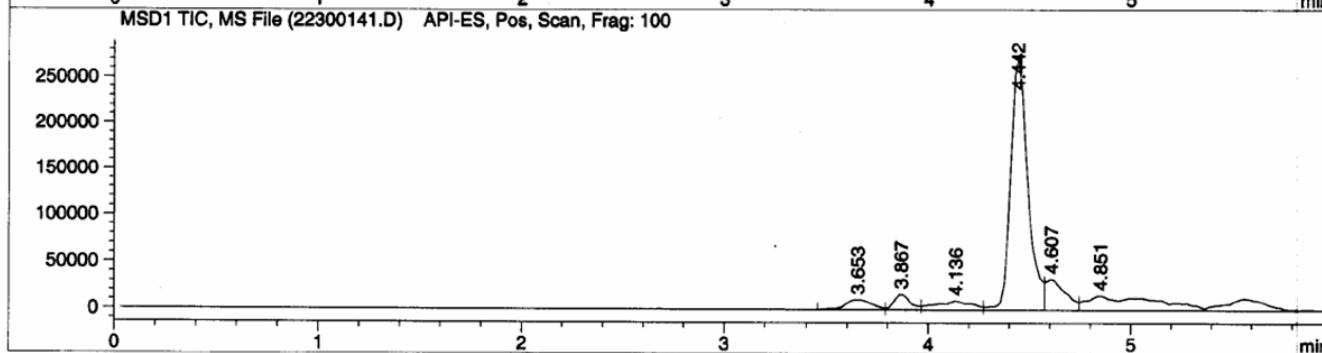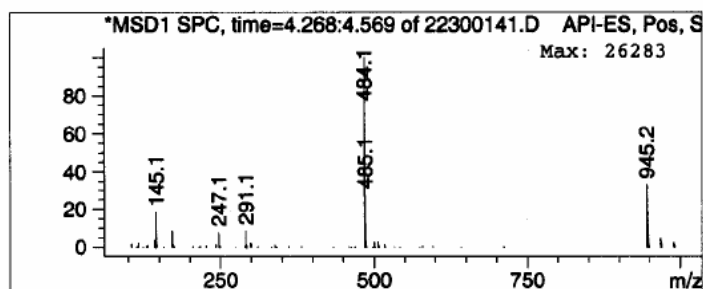

5-Ethyl-4-(propylthio)-2-(p-tolyl)-1-tosylpyrrolidine-3-carboxylic acid (A05C02E18)

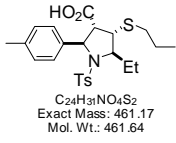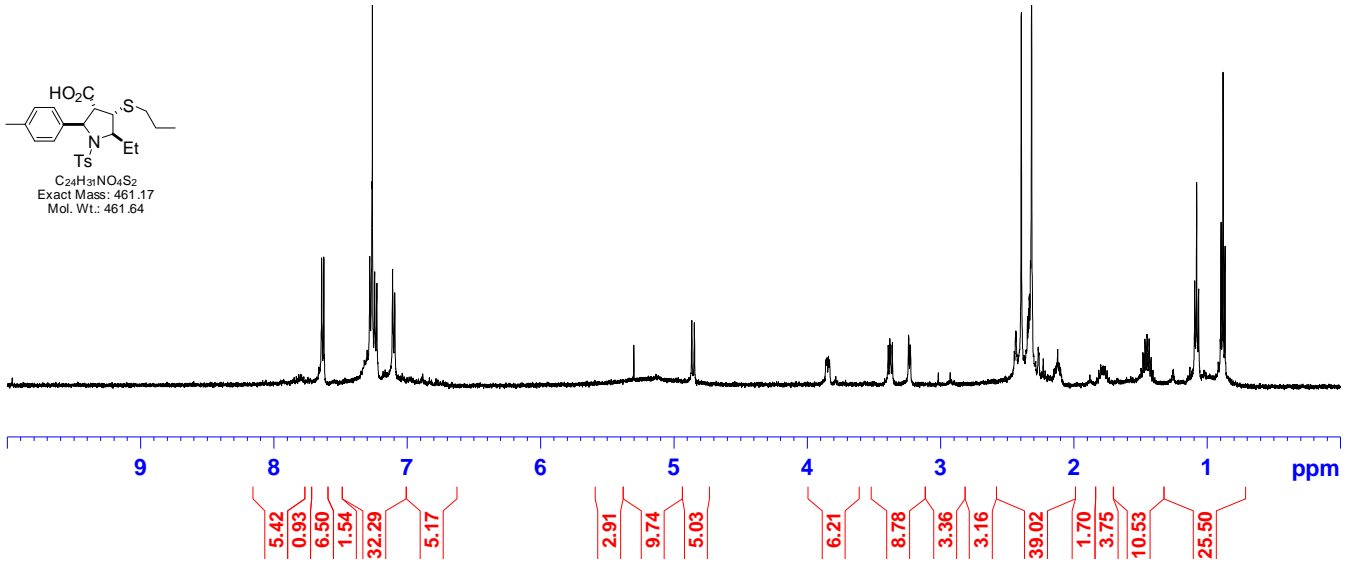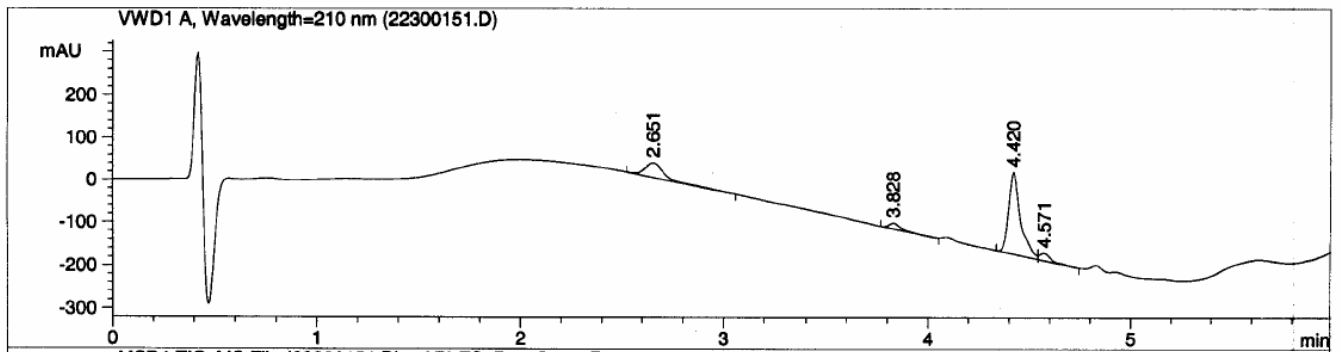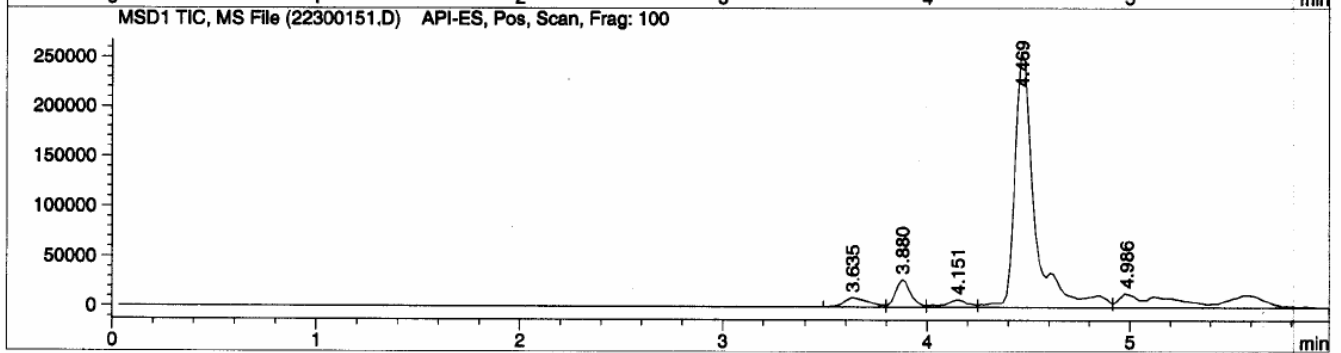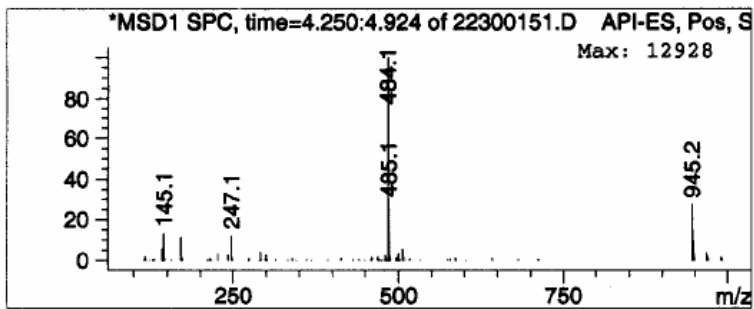

4-(*Tert*-butylthio)-5-ethyl-2-(*p*-tolyl)-1-tosylpyrrolidine-3-carboxylic acid (A05C02E19)

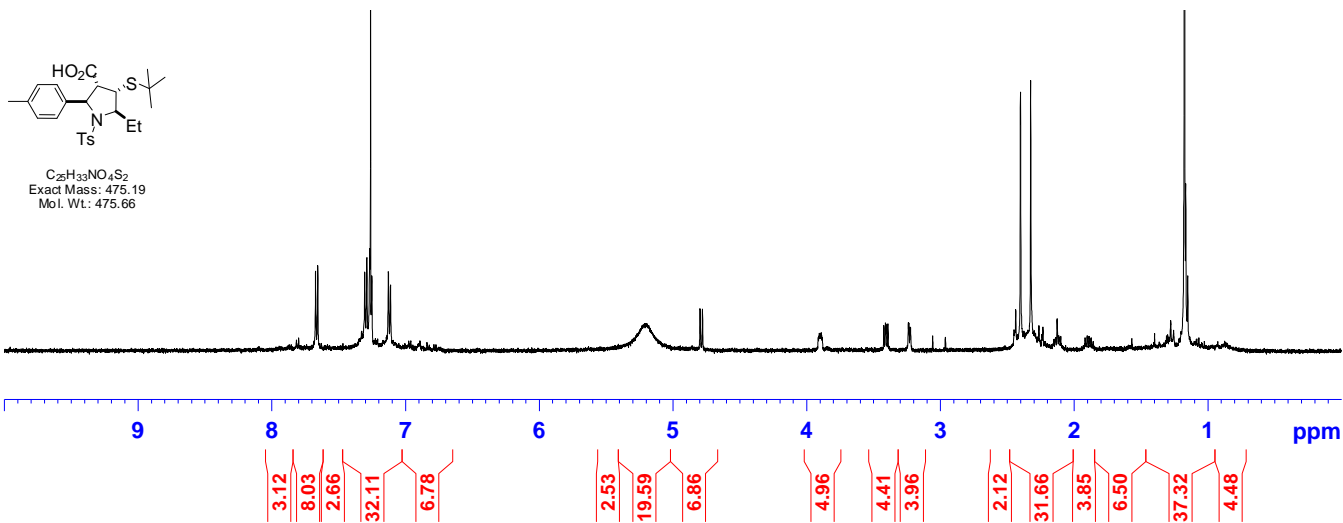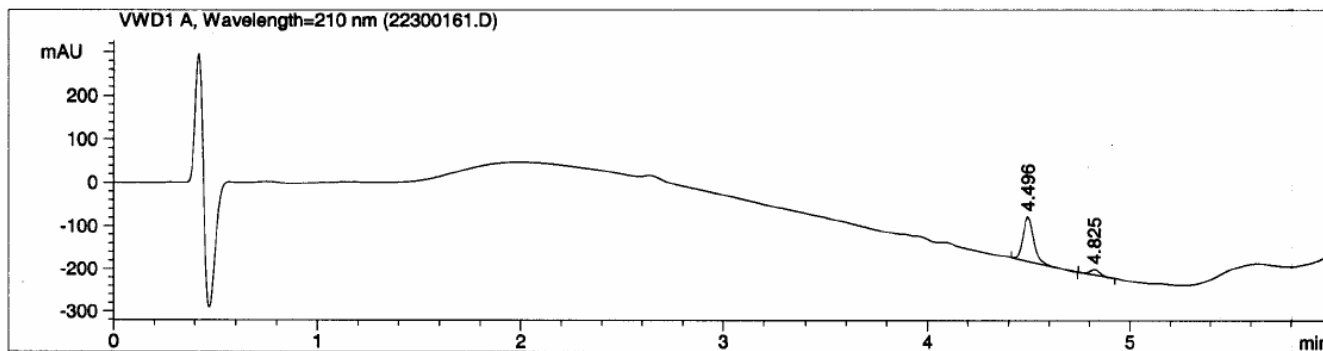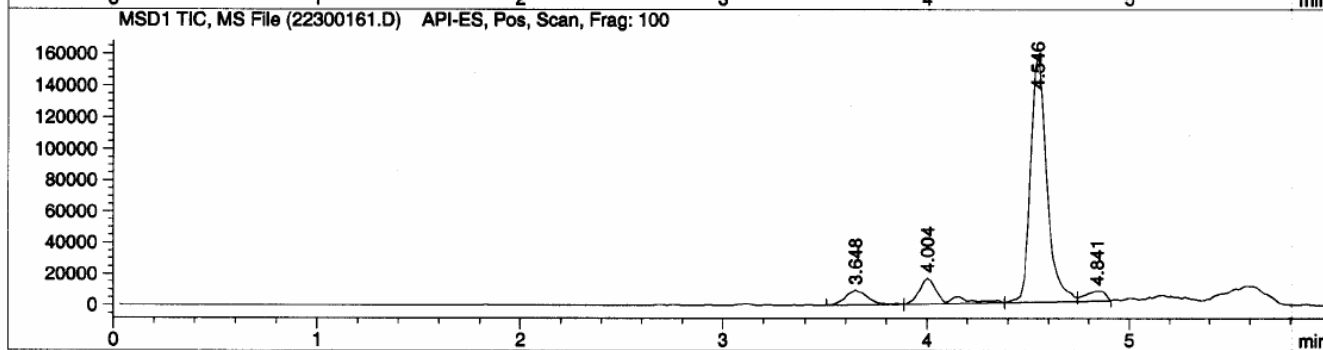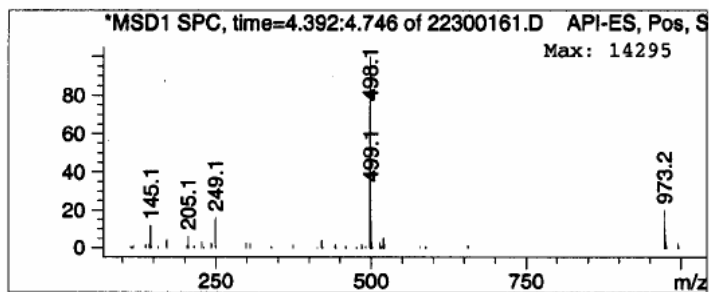

4-(*Sec*-butylthio)-5-ethyl-2-(*p*-tolyl)-1-tosylpyrrolidine-3-carboxylic acid (A05C02E20)

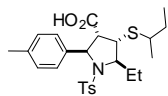

C<sub>25</sub>H<sub>32</sub>NO<sub>4</sub>S<sub>2</sub>  
 Exact Mass: 475.19  
 Mol. Wt.: 475.66

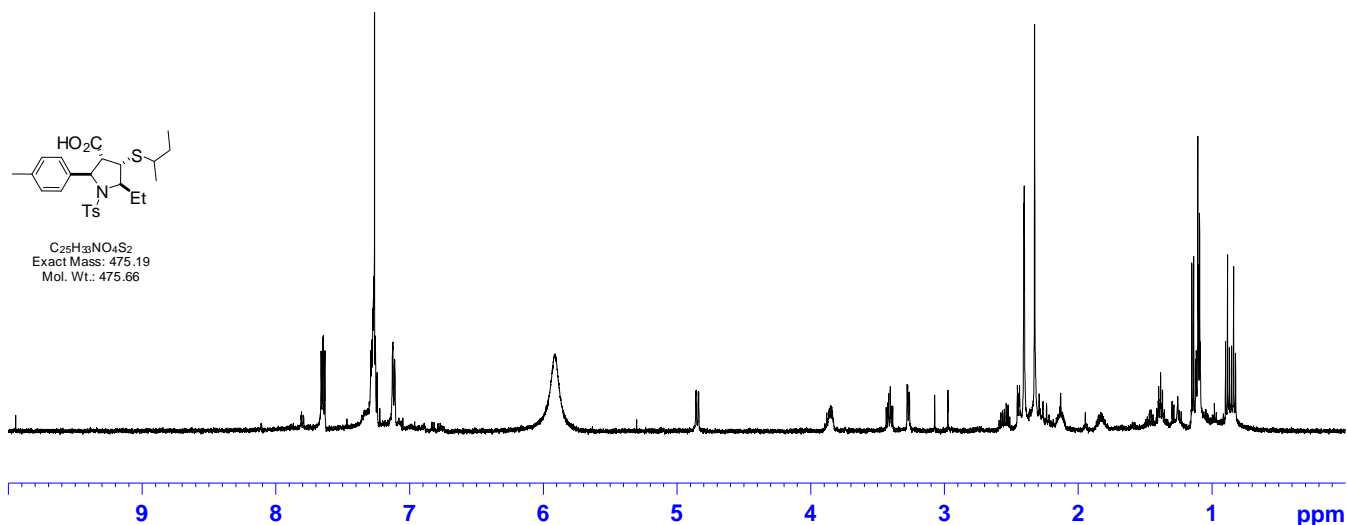

Integration values (from left to right): 5.11, 0.47, 5.35, 1.92, 27.64, 5.26, 2.87, 21.28, 3.80, 4.64, 3.73, 3.46, 1.46, 1.79, 3.88, 27.34, 1.68, 3.26, 3.42, 11.67, 28.38, 2.52

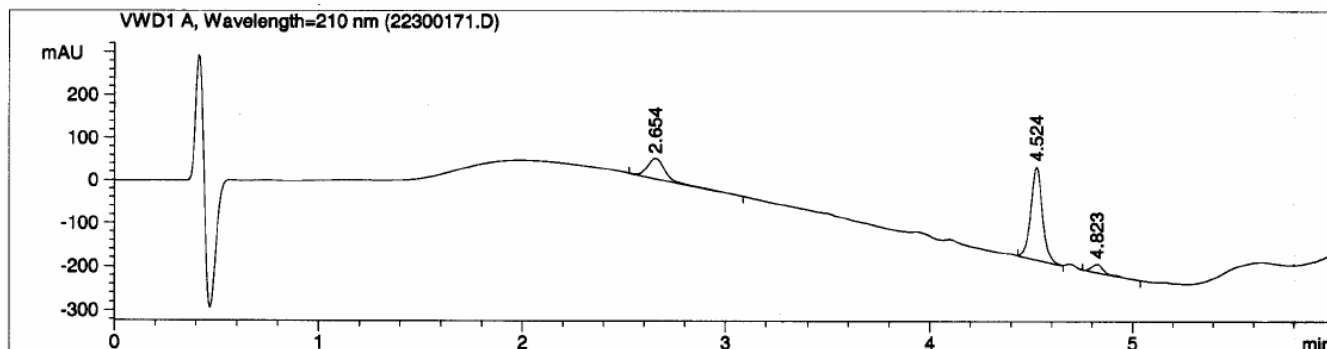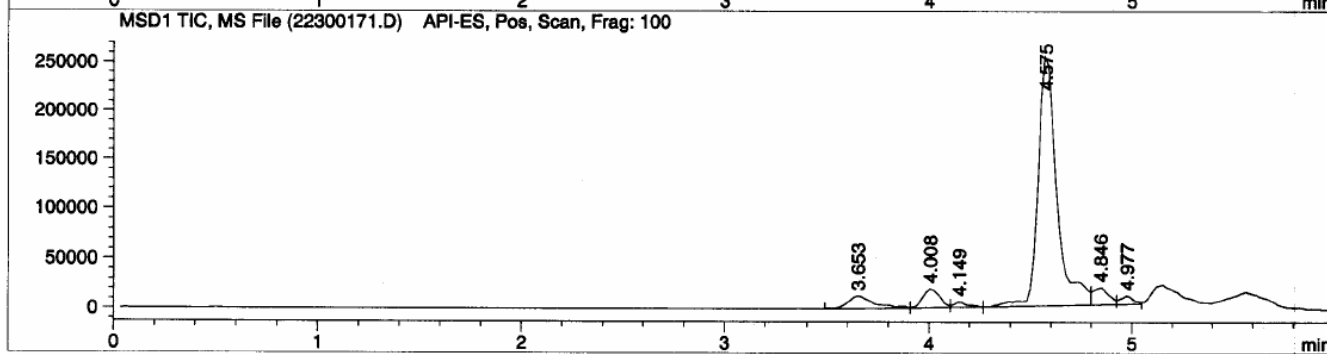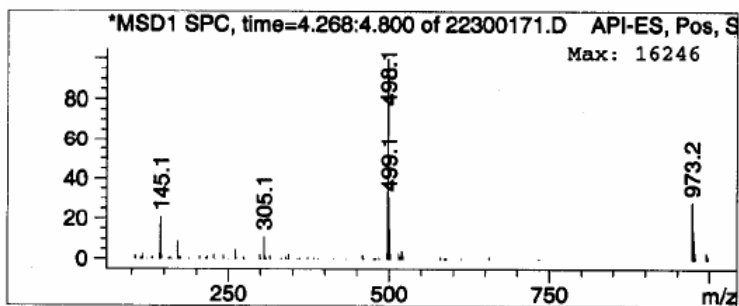

**5-Ethyl-4-(isobutylthio)-2-(*p*-tolyl)-1-tosylpyrrolidine-3-carboxylic acid (A05C02E21)**

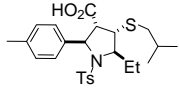

C<sub>25</sub>H<sub>33</sub>NO<sub>4</sub>S<sub>2</sub>  
 Exact Mass: 475.19  
 Mol. Wt.: 475.66

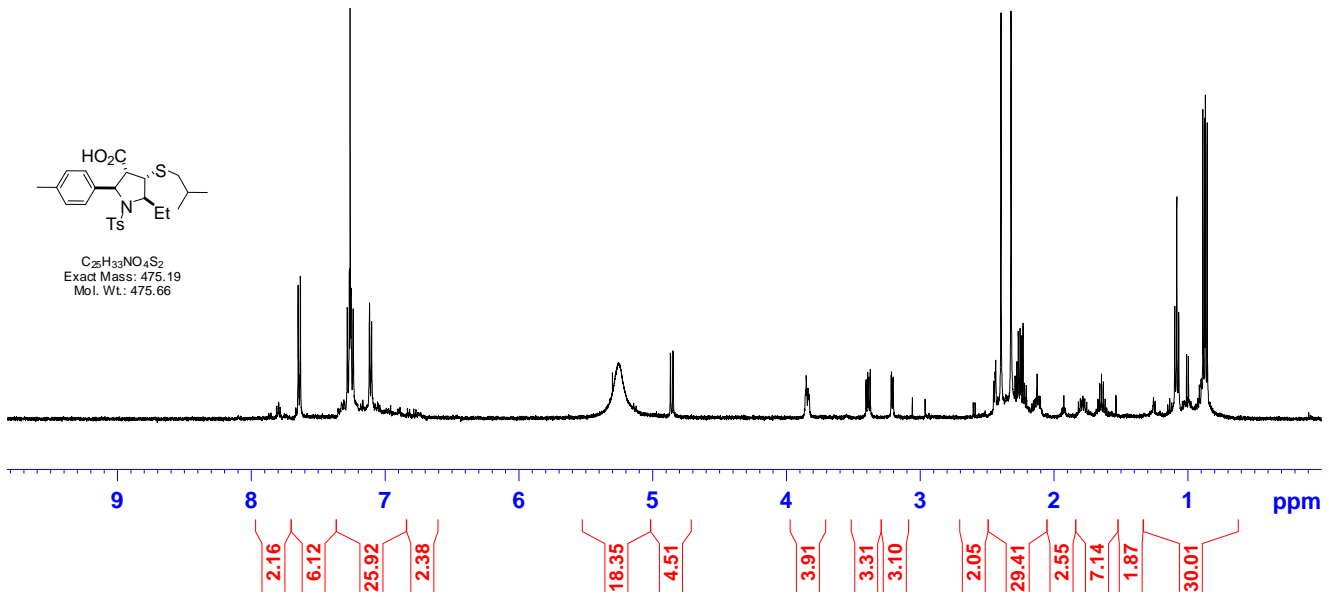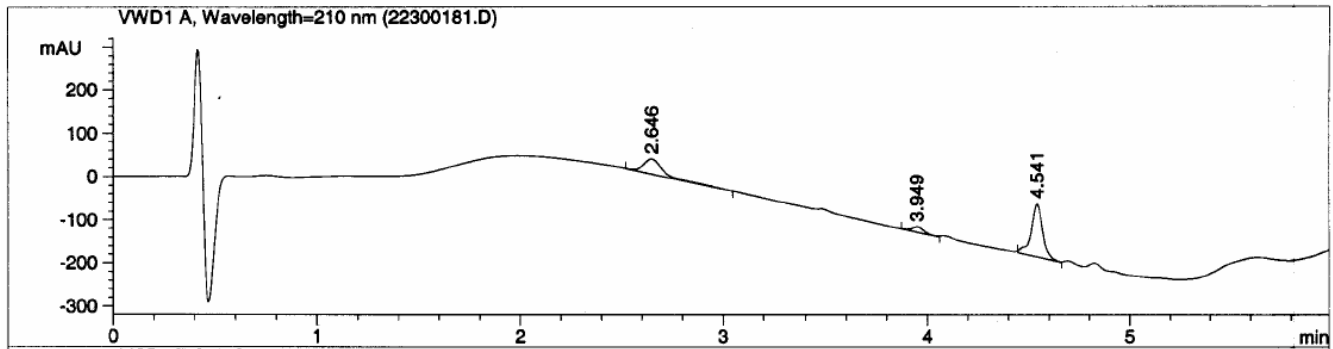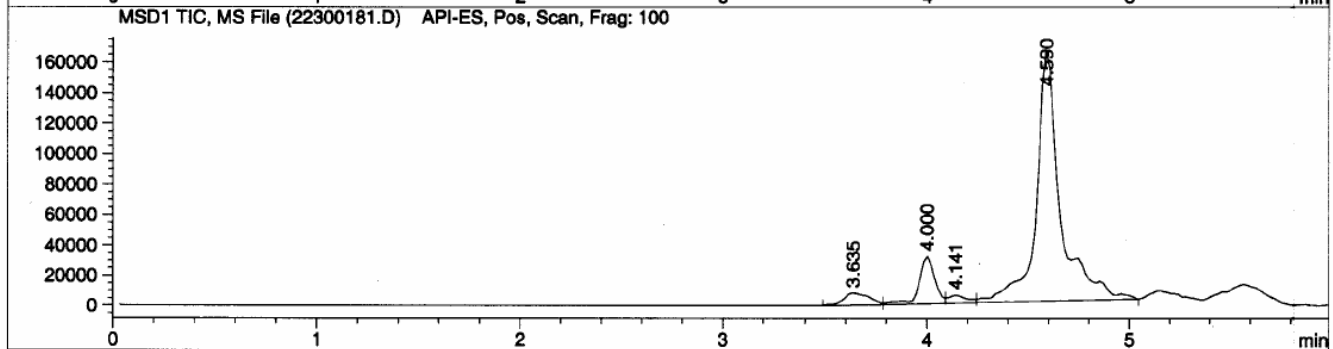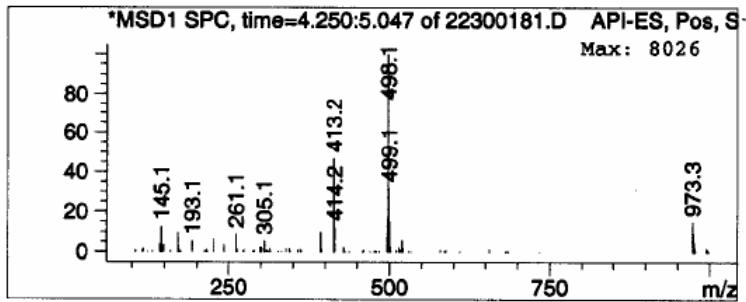

4-(Butylthio)-5-ethyl-2-(*p*-tolyl)-1-tosylpyrrolidine-3-carboxylic acid (A05C02E22)

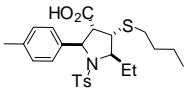

C<sub>29</sub>H<sub>33</sub>NO<sub>4</sub>S<sub>2</sub>  
 Exact Mass: 475.19  
 Mol. Wt.: 475.66

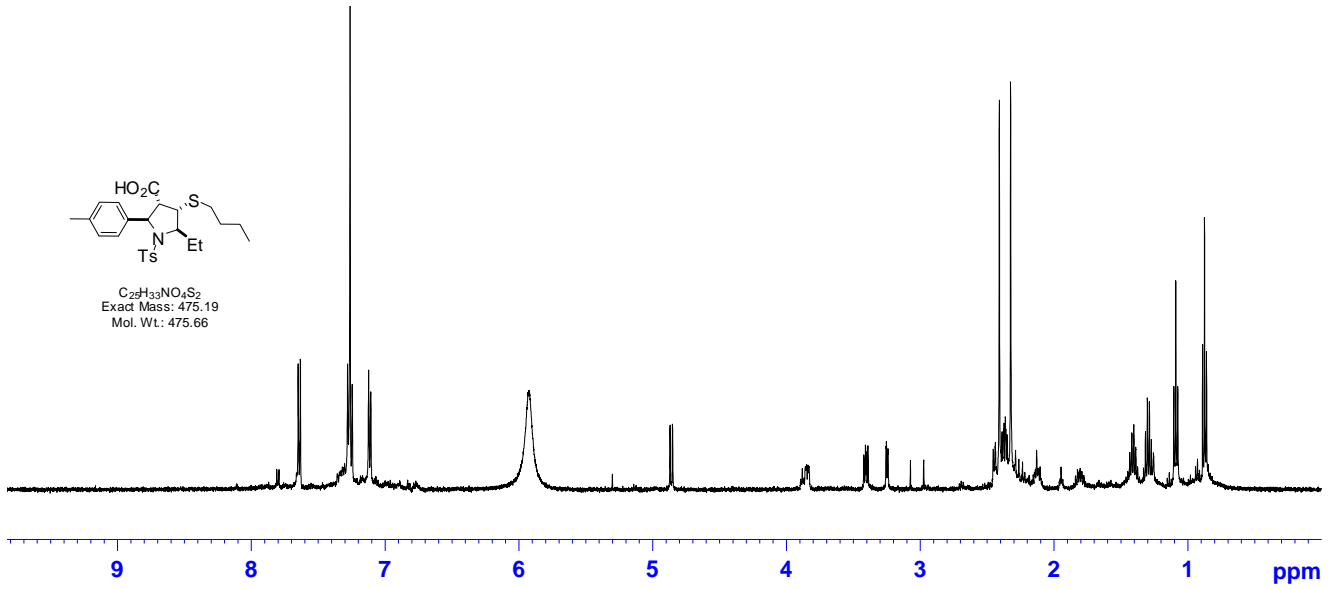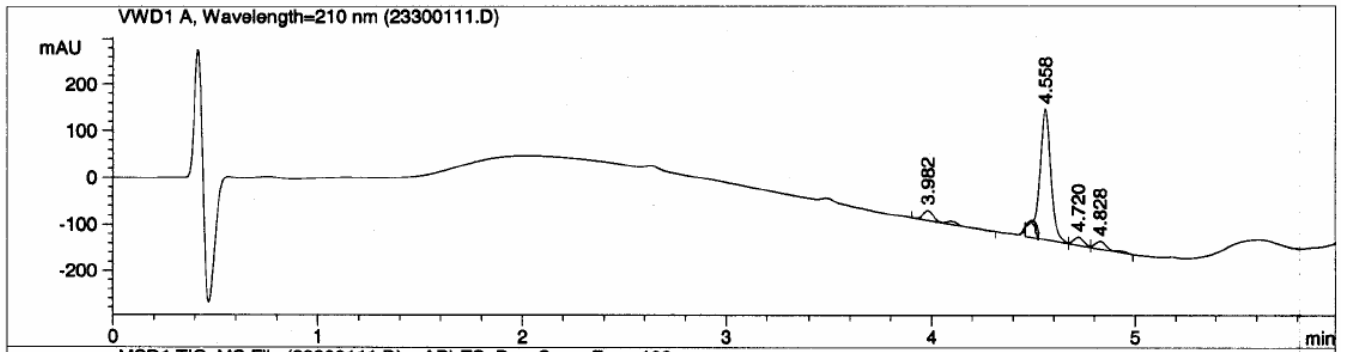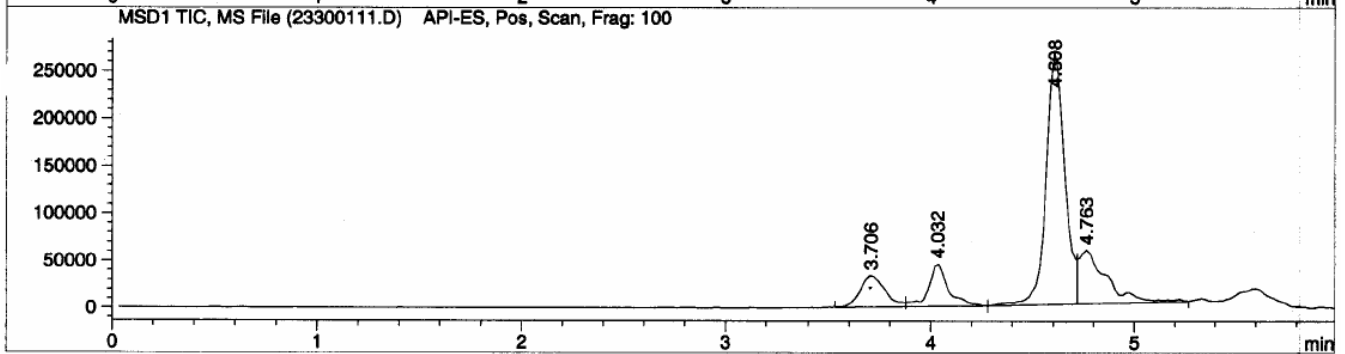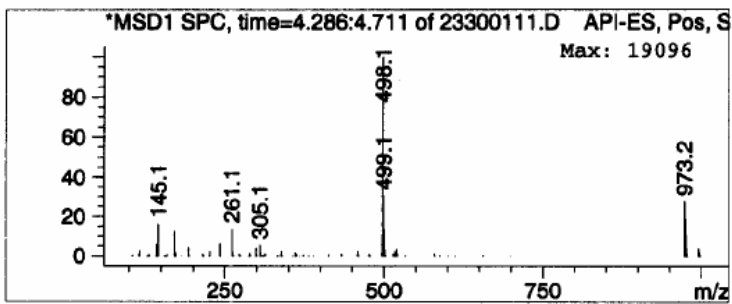



# 5-Ethyl-4-(isopentylthio)-2-(*p*-tolyl)-1-tosylpyrrolidine-3-carboxylic acid (A05C02E23)

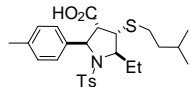

C<sub>22</sub>H<sub>35</sub>NO<sub>4</sub>S<sub>2</sub>  
Exact Mass: 489.2  
Mol. Wt.: 489.69

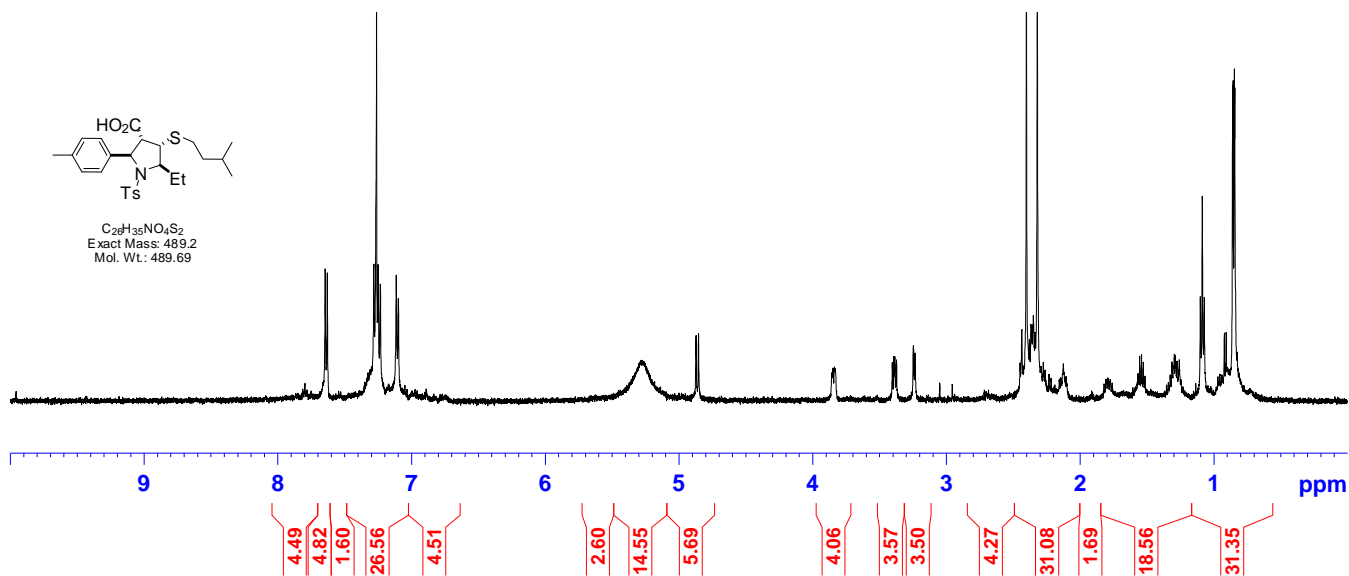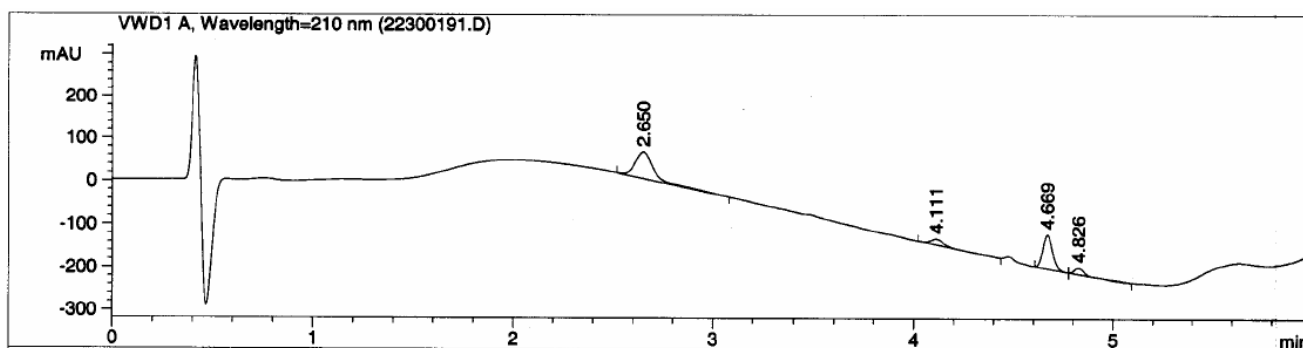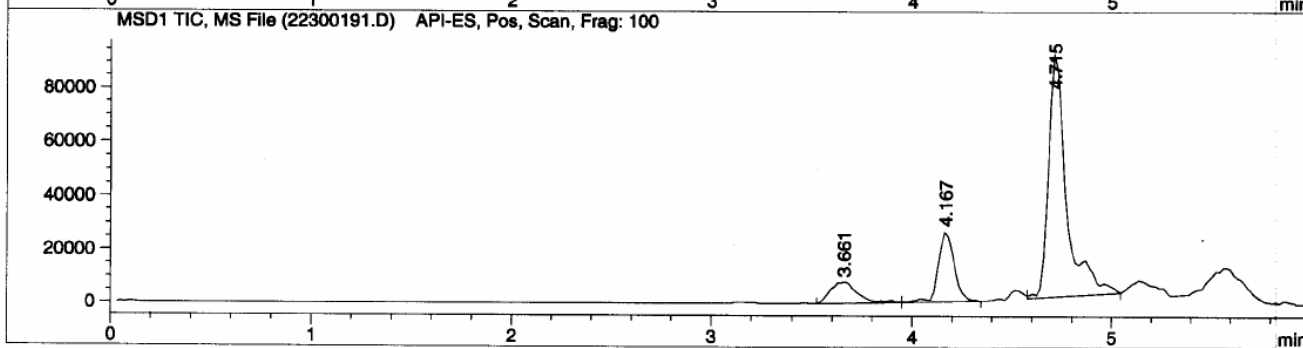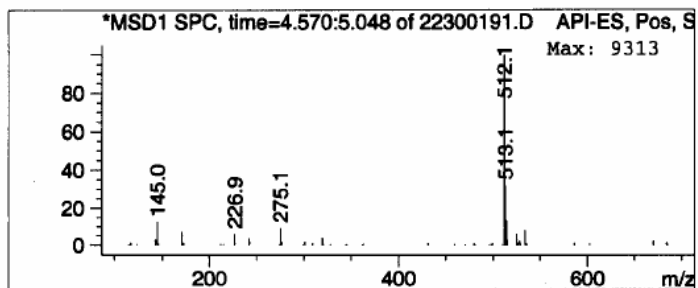

5-Ethyl-4-(pentylthio)-2-(p-tolyl)-1-tosylpyrrolidine-3-carboxylic acid (A05C02E24)

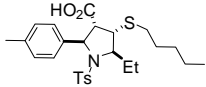

C<sub>26</sub>H<sub>35</sub>NO<sub>4</sub>S<sub>2</sub>  
 Exact Mass: 489.2  
 Mol. Wt.: 489.69

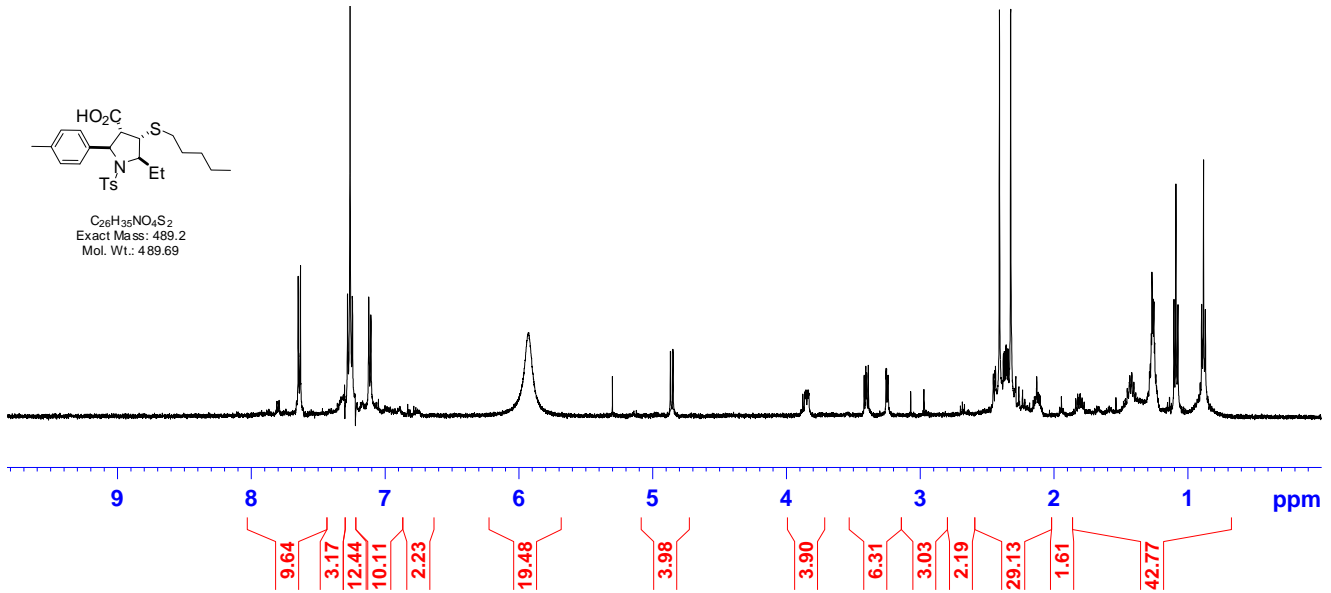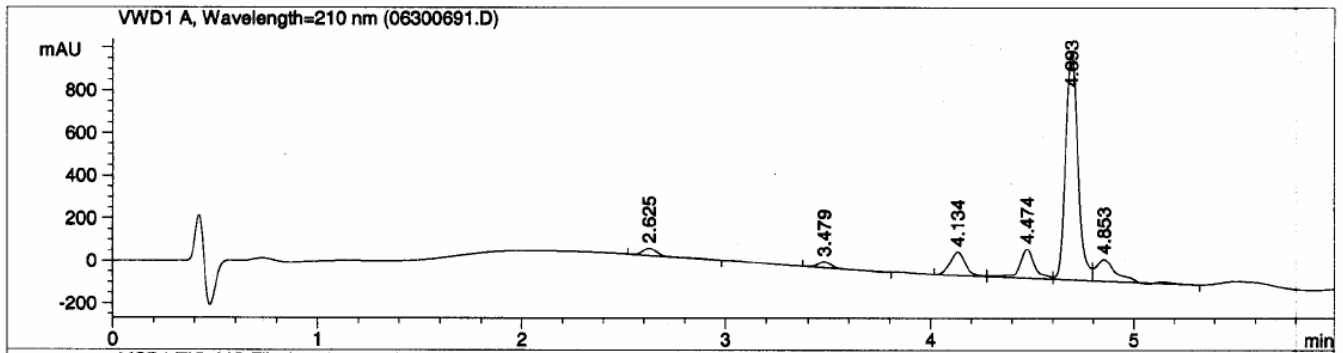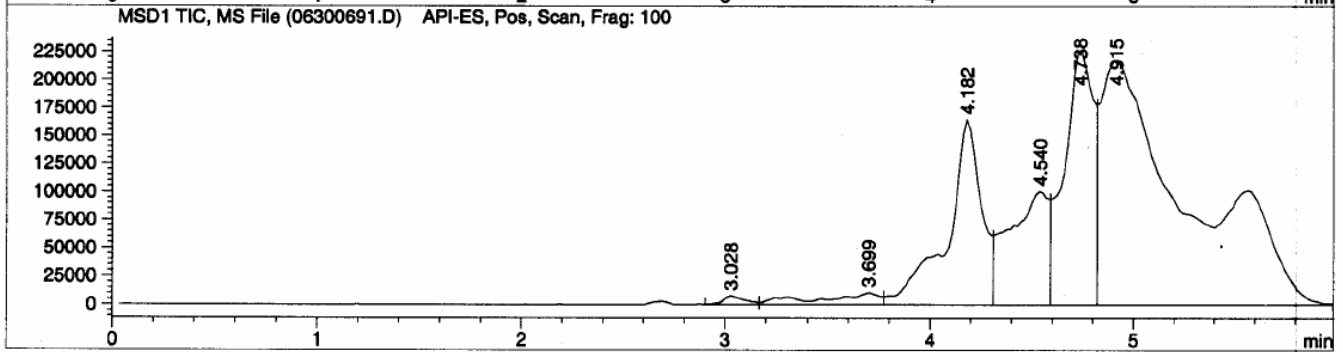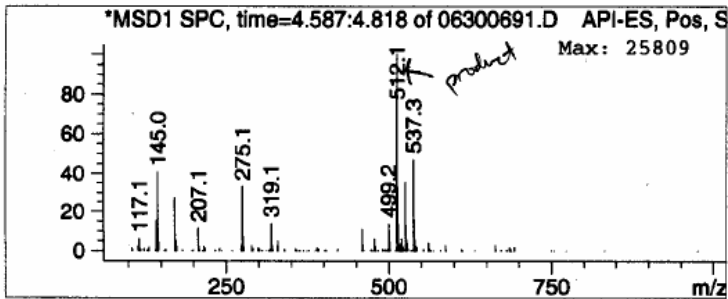

5-Ethyl-4-(hexylthio)-2-(*p*-tolyl)-1-tosylpyrrolidine-3-carboxylic acid (A05C02E25)

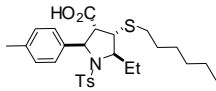

C<sub>27</sub>H<sub>37</sub>NO<sub>4</sub>S<sub>2</sub>  
 Exact Mass: 503.22  
 Mol. Wt.: 503.72

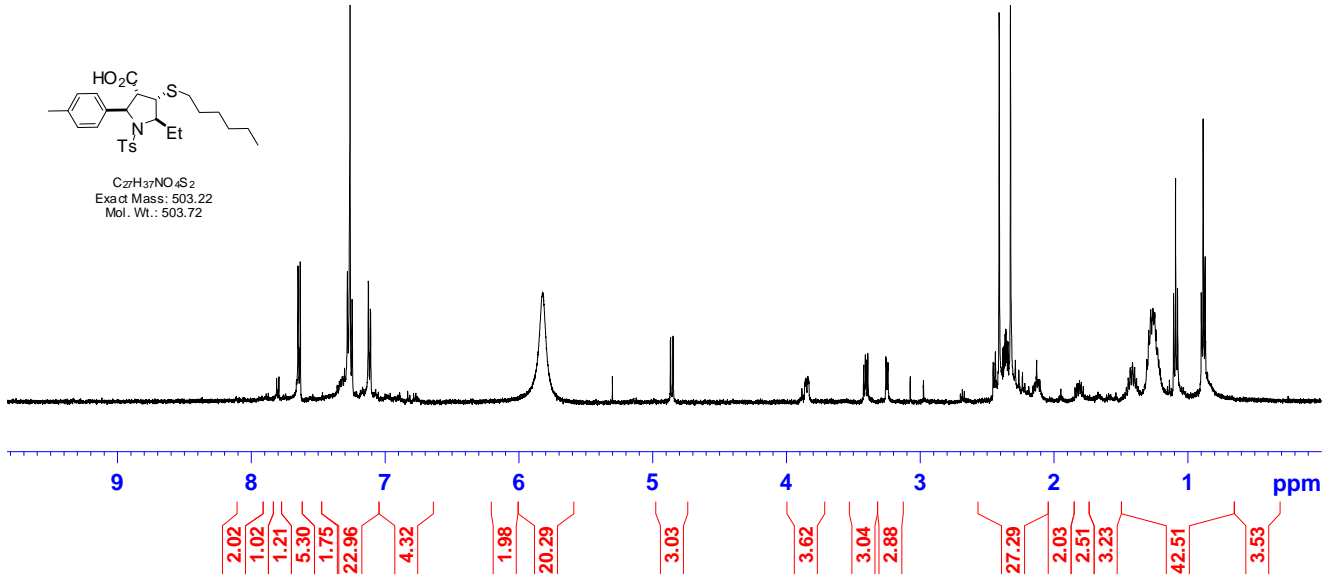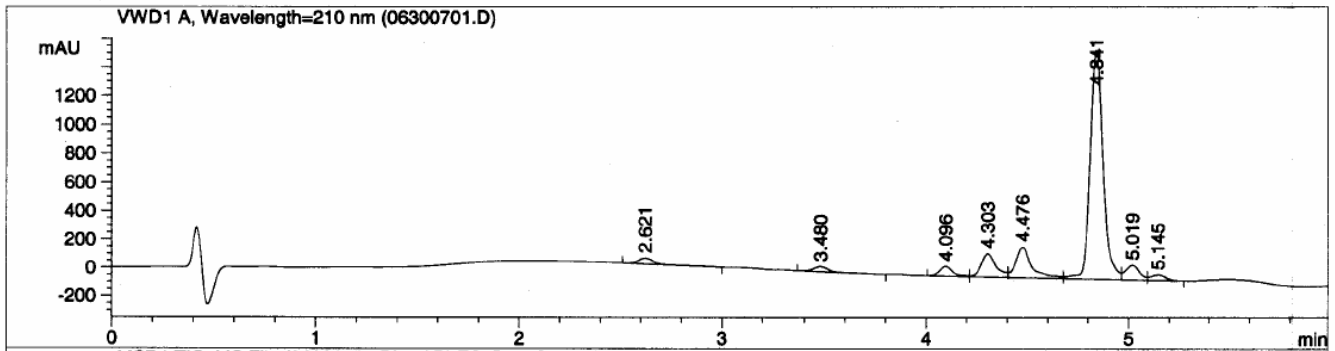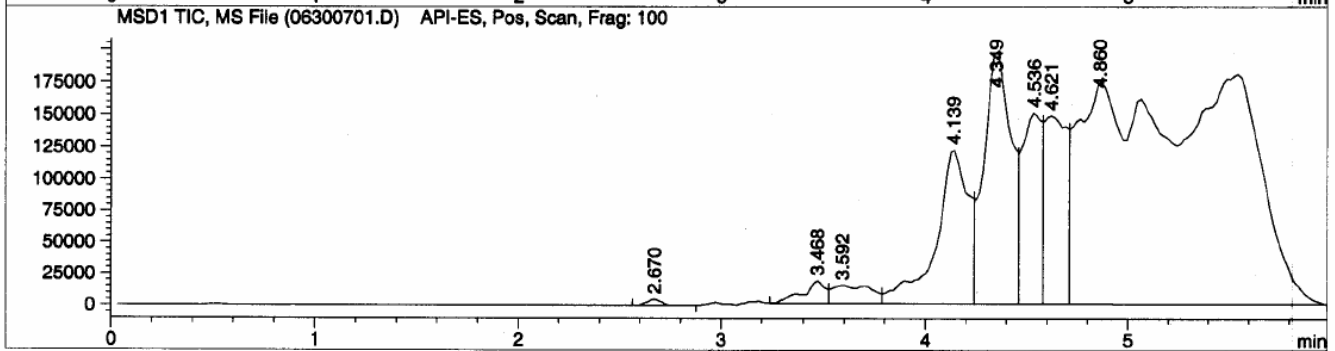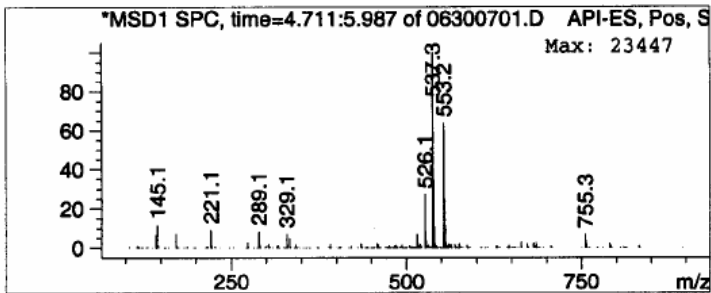

# 4-(Cyclopentylthio)-5-ethyl-2-(*p*-tolyl)-1-tosylpyrrolidine-3-carboxylic acid (A05C02E28)

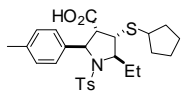

C<sub>26</sub>H<sub>33</sub>NO<sub>4</sub>S<sub>2</sub>  
Exact Mass: 487.19  
Mol. Wt.: 487.67

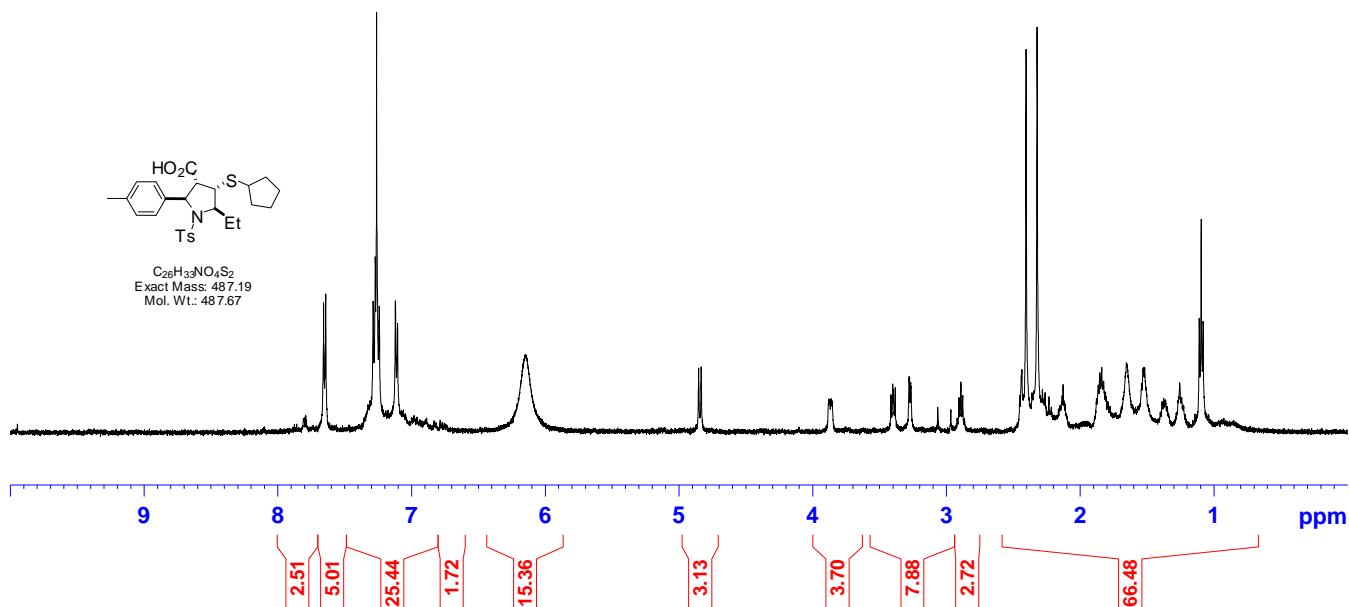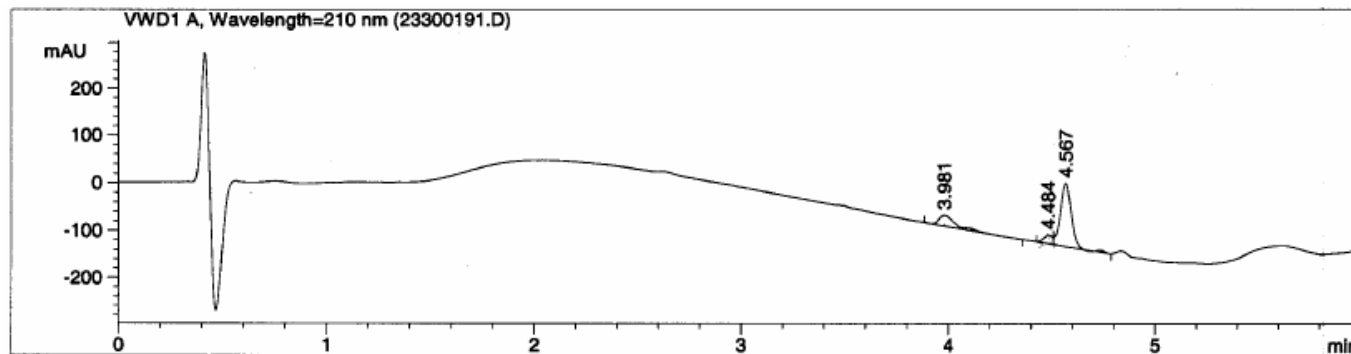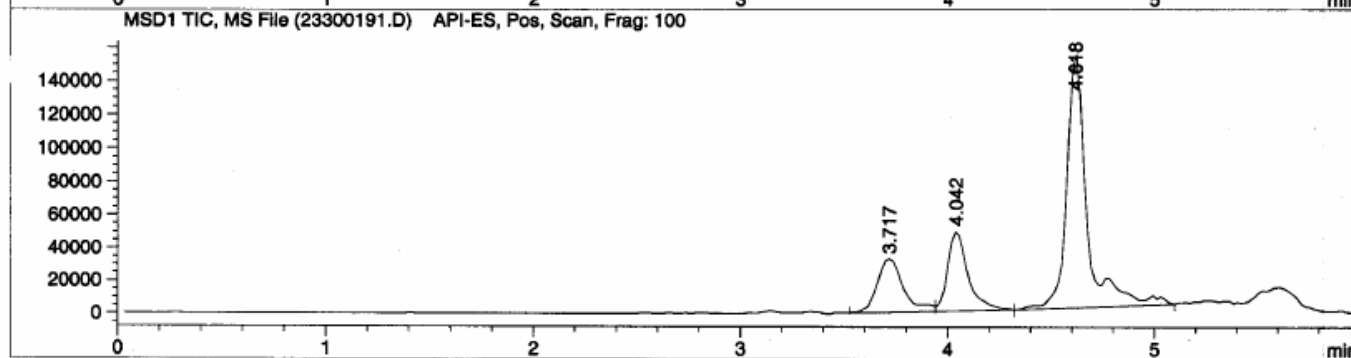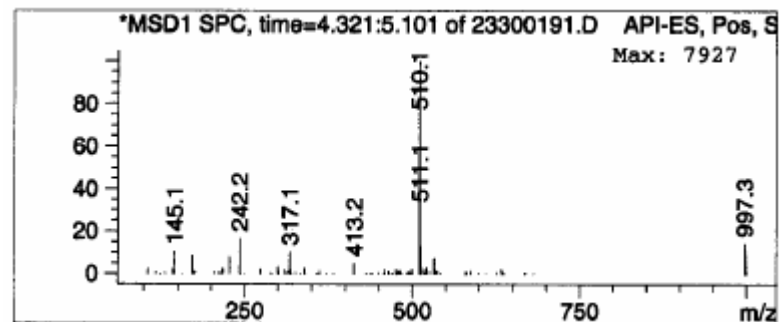

4-(Cyclohexylthio)-5-ethyl-2-(*p*-tolyl)-1-tosylpyrrolidine-3-carboxylic acid (A05C02E29)

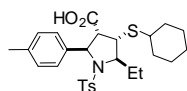

C<sub>27</sub>H<sub>35</sub>NO<sub>4</sub>S<sub>2</sub>  
Exact Mass: 501.2  
Mol. Wt.: 501.7

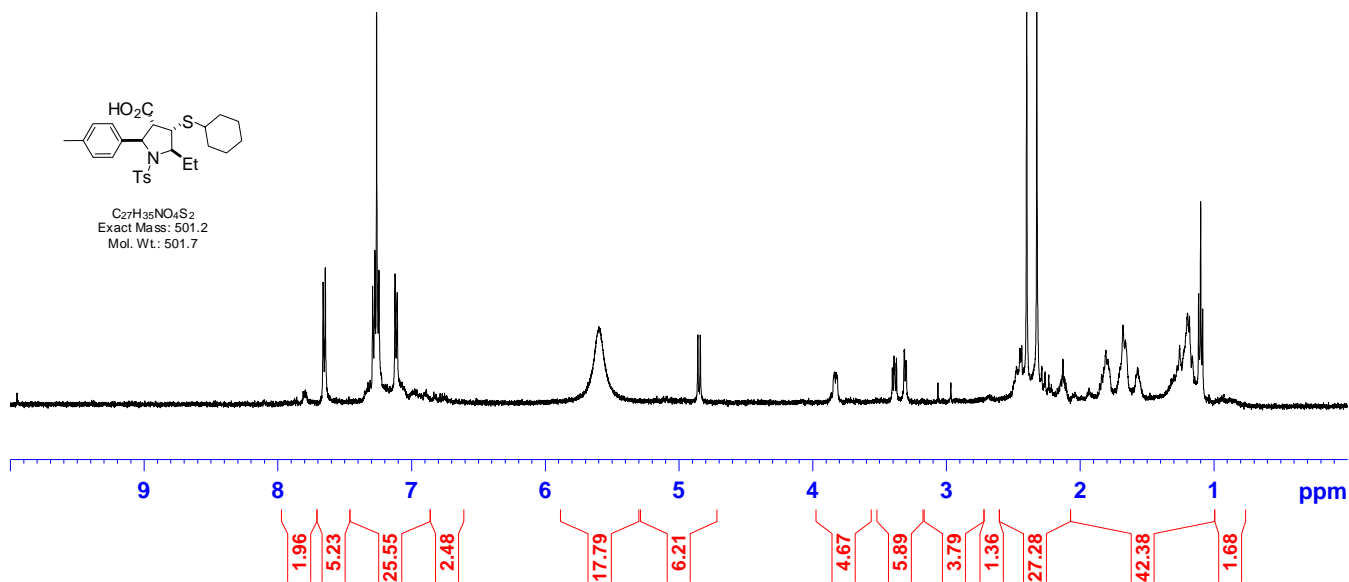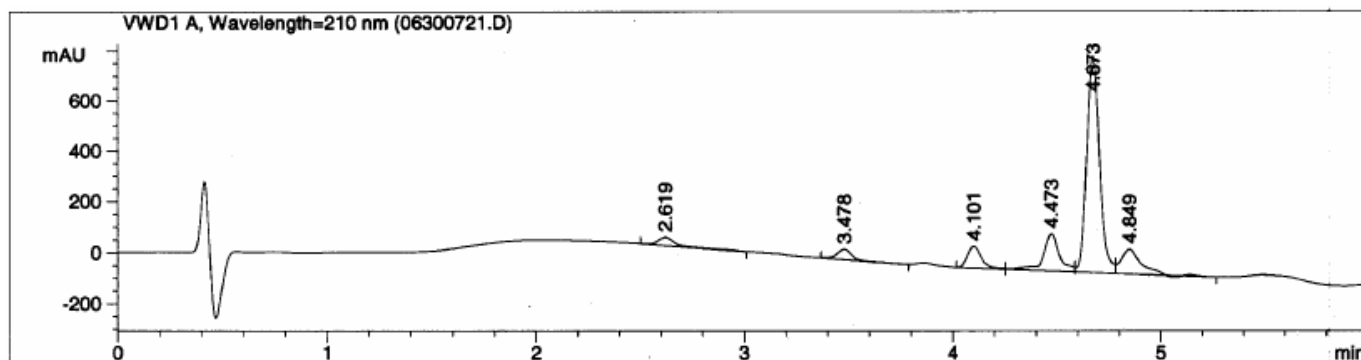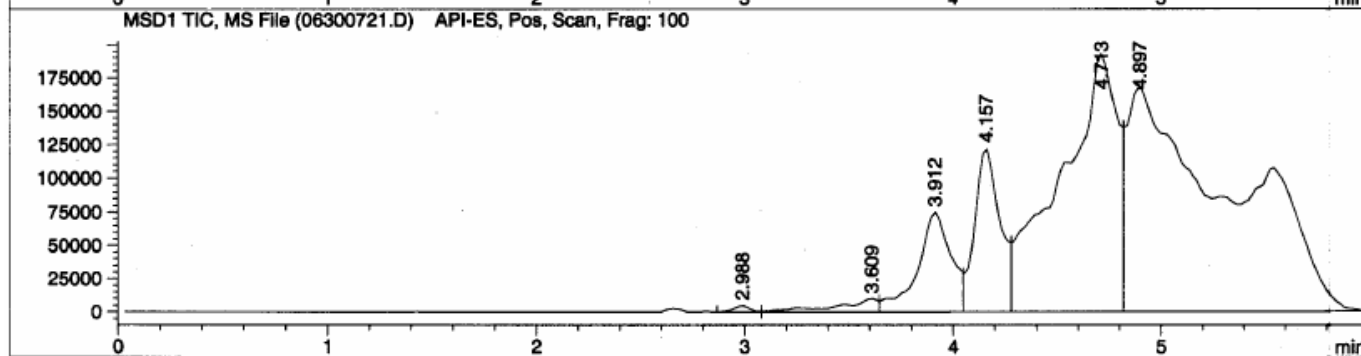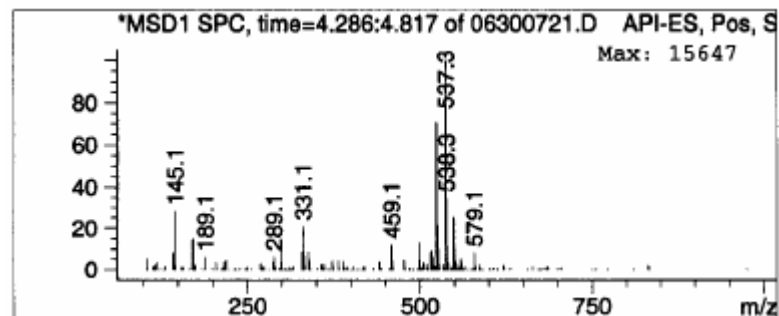

Component 4: Peak at Scan 265.1. Top ions are 524 145 331

# 4-(Allylthio)-5-ethyl-2-(*p*-tolyl)-1-tosylpyrrolidine-3-carboxylic acid (A05C02E30)

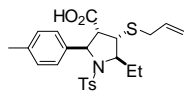

C<sub>24</sub>H<sub>29</sub>NO<sub>4</sub>S<sub>2</sub>  
Exact Mass: 459.15  
Mol. Wt.: 459.62

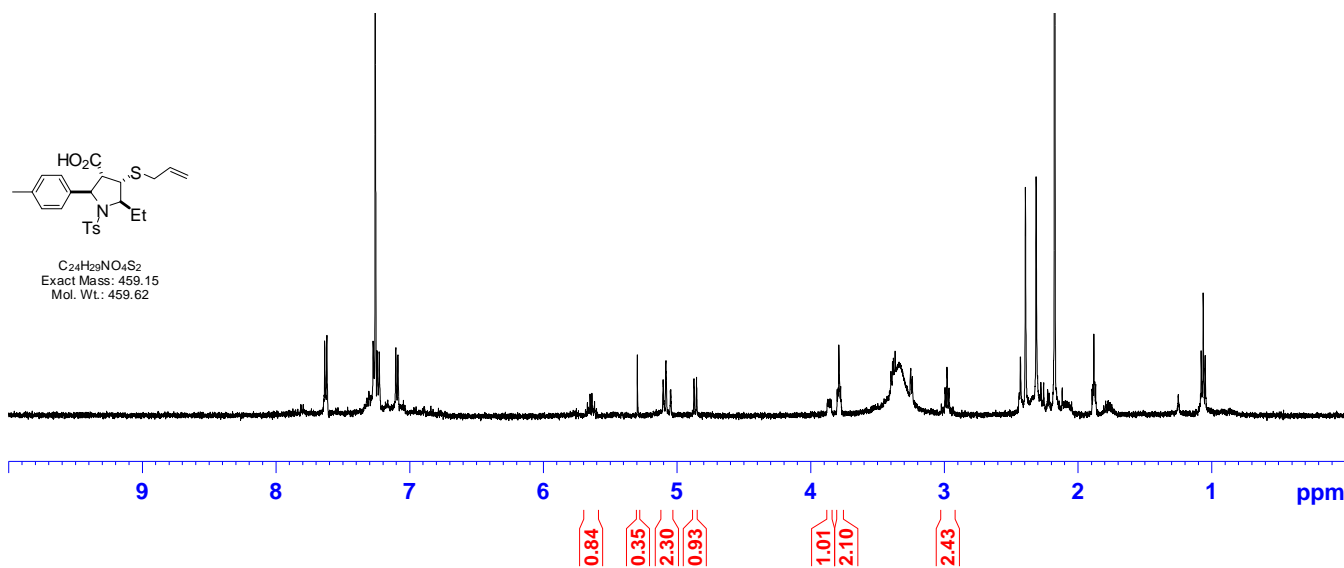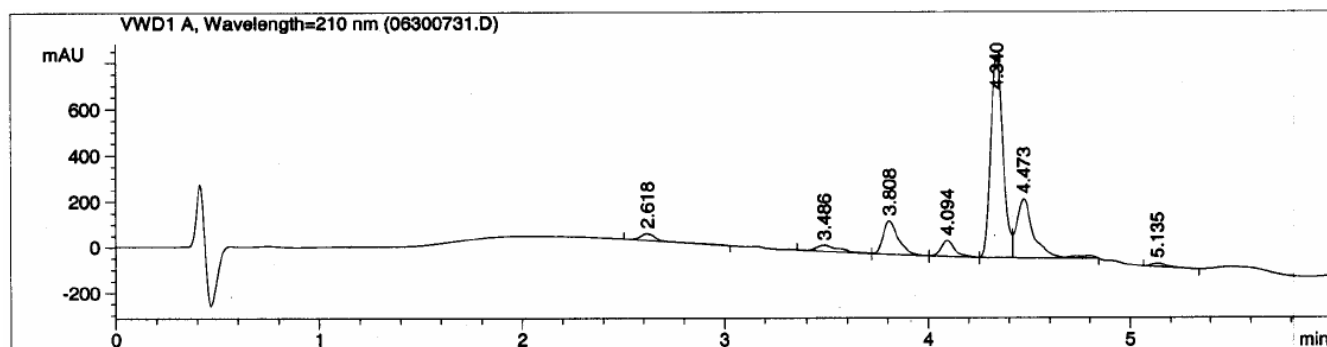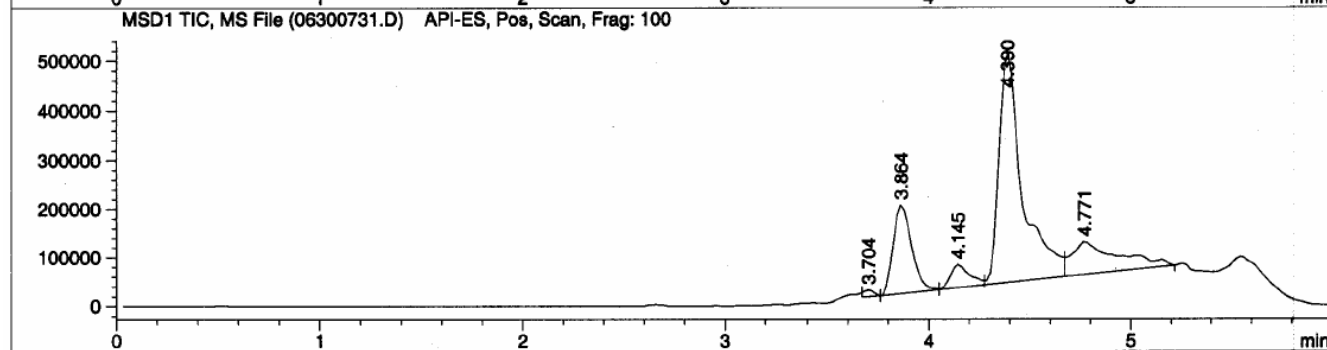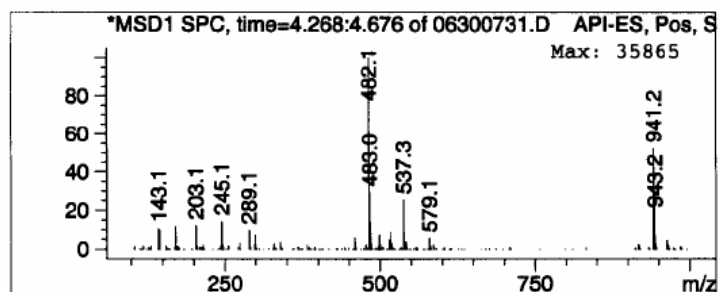

5-Ethyl-4-(3-methoxy-3-oxopropylthio)-2-p-tolyl-1-tosylpyrrolidine-3-carboxylic acid (A05C02E31)

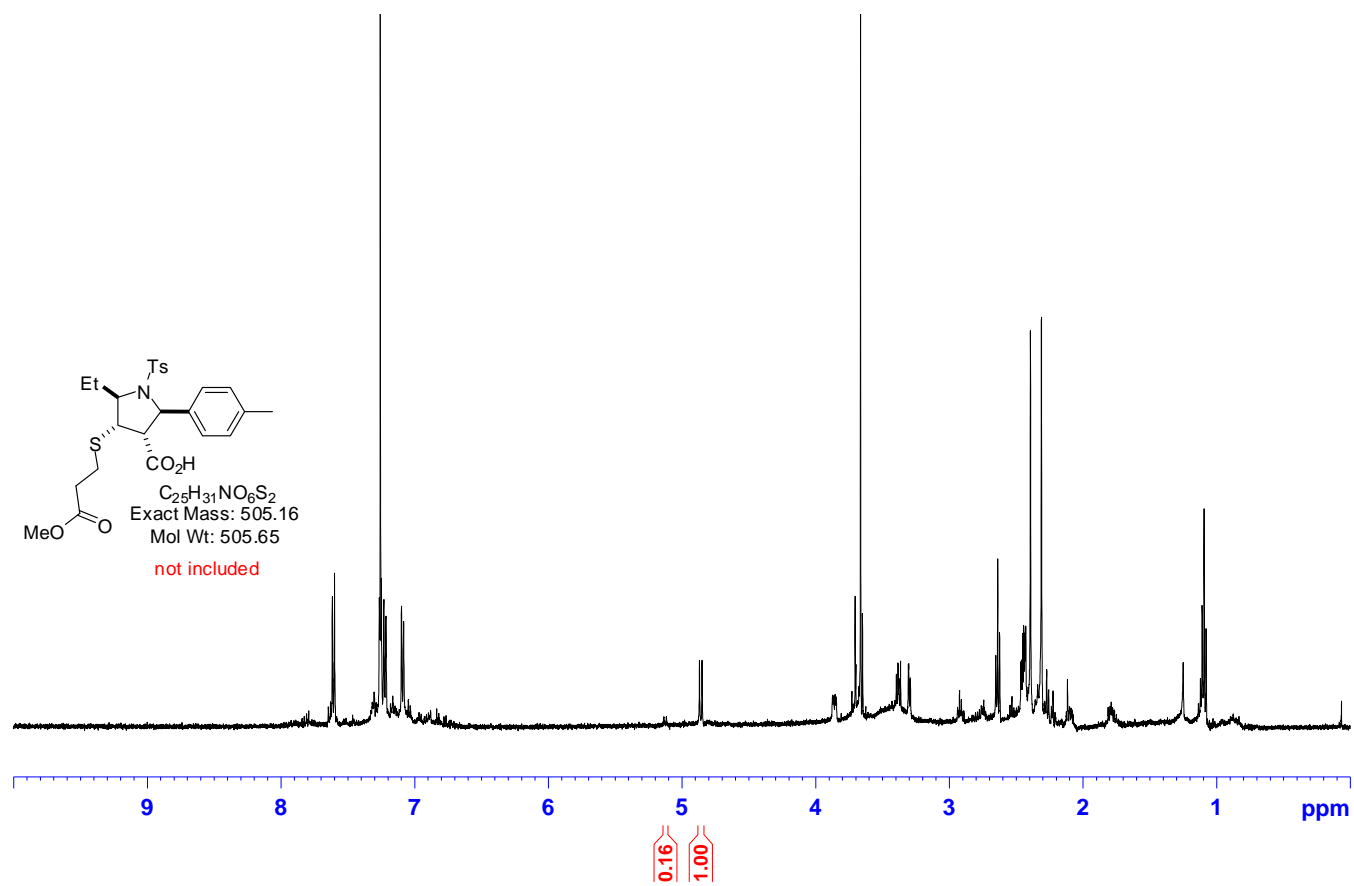

4-(3-Tert-butoxy-3-oxopropylthio)-5-ethyl-2-(p-tolyl)-1-tosylpyrrolidine-3-carboxylic acid (A05C02E32)

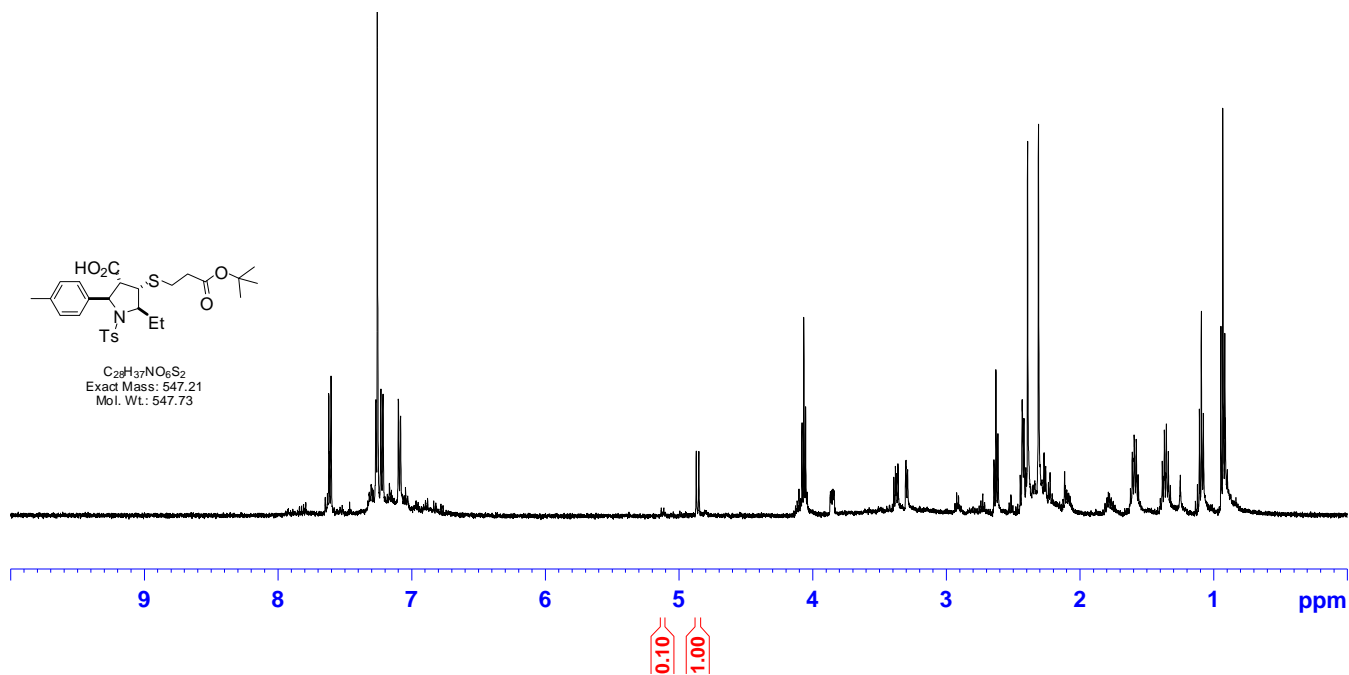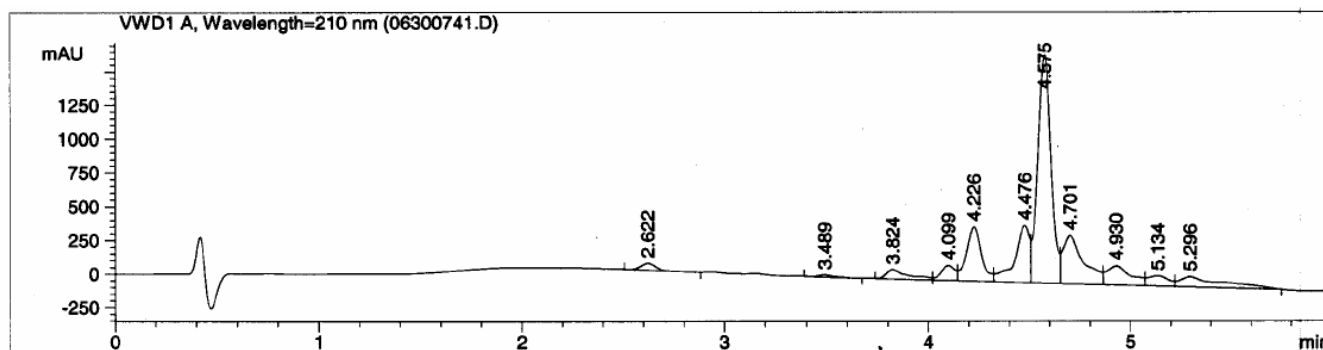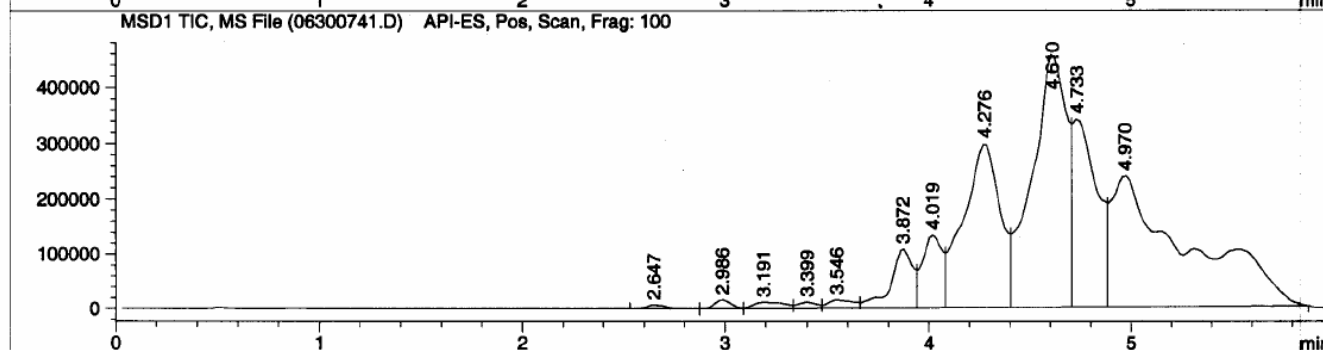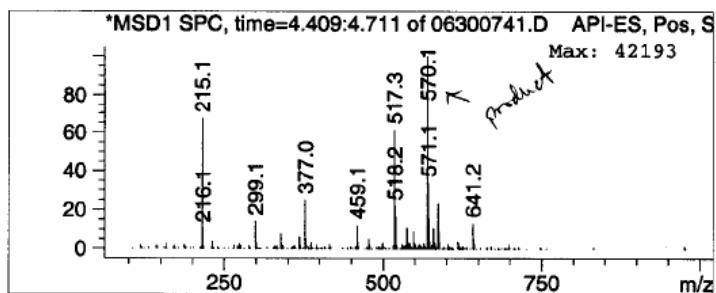

Supplement: NIHMS63737-supplement-4si20070310_06.pdf [file NIHMS63737-supplement-4si20070310_06.pdf]
