# Supplementary material
Source: PubMed Central journal article supplement (PMC2543057)

## Supporting Information, Part B

### Small-Molecule Inhibitors of Protein Geranylgeranyltransferase Type I

Sabrina Castellano, Hannah D. G. Fiji, Sape S. Kinderman, Masaru Watanabe,<sup>1</sup> Pablo de Leon, Fuyuhiko Tamanoi,<sup>1</sup>  
Ohyun Kwon\*

*Department of Chemistry and Biochemistry, Department of Microbiology, Immunology and Molecular Genetics,  
Jonsson Comprehensive Cancer Center and Molecular Biology Institute, University of California, Los Angeles,  
607 Charles E. Young Drive East, Los Angeles, CA 90095-1569  
[ohyun@chem.ucla.edu](mailto:ohyun@chem.ucla.edu)*

#### Contents

|                                                                                                                        |     |
|------------------------------------------------------------------------------------------------------------------------|-----|
| Spectral Data for 4-Ethyl-buta-2,3-dienoic acid <b>A05</b>                                                             | S44 |
| Spectral Data for 5-Cyclopentyl-penta-2,3-dienoic acid ethyl ester <b>Et-A11</b>                                       | S45 |
| Spectral Data for 5-Cyclopentyl-penta-2,3-dienoic acid <b>A11</b>                                                      | S46 |
| Spectral Data for 2-Benzyl-buta-2,3-dienoic acids <b>B(03-12)</b>                                                      | S47 |
| Spectral Data for Imines                                                                                               | S57 |
| Spectral Data for 2-( <i>p</i> -Tolyl)-1-tosyl-2,5-dihydro-1 <i>H</i> -pyrrole-3-carboxylic acid <b>A01C02</b>         | S65 |
| Spectral Data for 5-Ethyl-2-( <i>p</i> -tolyl)-1-tosyl-2,5-dihydro-1 <i>H</i> -pyrrole-3-carboxylic acid <b>A05C02</b> | S66 |
| Spectral Data for 1-Tosyl-6-( <i>p</i> -tolyl)-1,2,5,6-tetrahydropyridine-3-carboxylic acid <b>B01C02</b>              | S67 |
| Spectral Data for 6-(3-Chlorophenyl)-1-Tosyl-1,2,5,6-tetrahydropyridine-3-carboxylic acid <b>B01C12</b>                | S68 |
| Spectral Data for 2-Phenyl-1-Tosyl-6-( <i>p</i> -tolyl)-1,2,5,6-tetrahydropyridine-3-carboxylic acid <b>B02C02</b>     | S69 |
| Spectral Data for 5-Ethyl-4-phenylsulfanyl-2-( <i>p</i> -tolyl)-1-tosyl-pyrrolidine-3-carboxylic acid <b>A05C02E01</b> | S70 |
| Spectral Data for 6-Phenyl-4-phenylsulfanyl-1-tosyl-piperidine-3-carboxylic acid <b>B01C01E01</b>                      | S71 |
| Spectral Data for 4-(4- <i>t</i> -Butylbenzylsulfanyl)-6-phenyl-1-tosyl-piperidine-3-carboxylic acid <b>B01C01E07</b>  | S72 |

---

<sup>1</sup> Department of Microbiology, Immunology and Molecular Genetics

### 4-Ethyl-but-2,3-dienoic acid and hex-3-ynoic acid (A05)

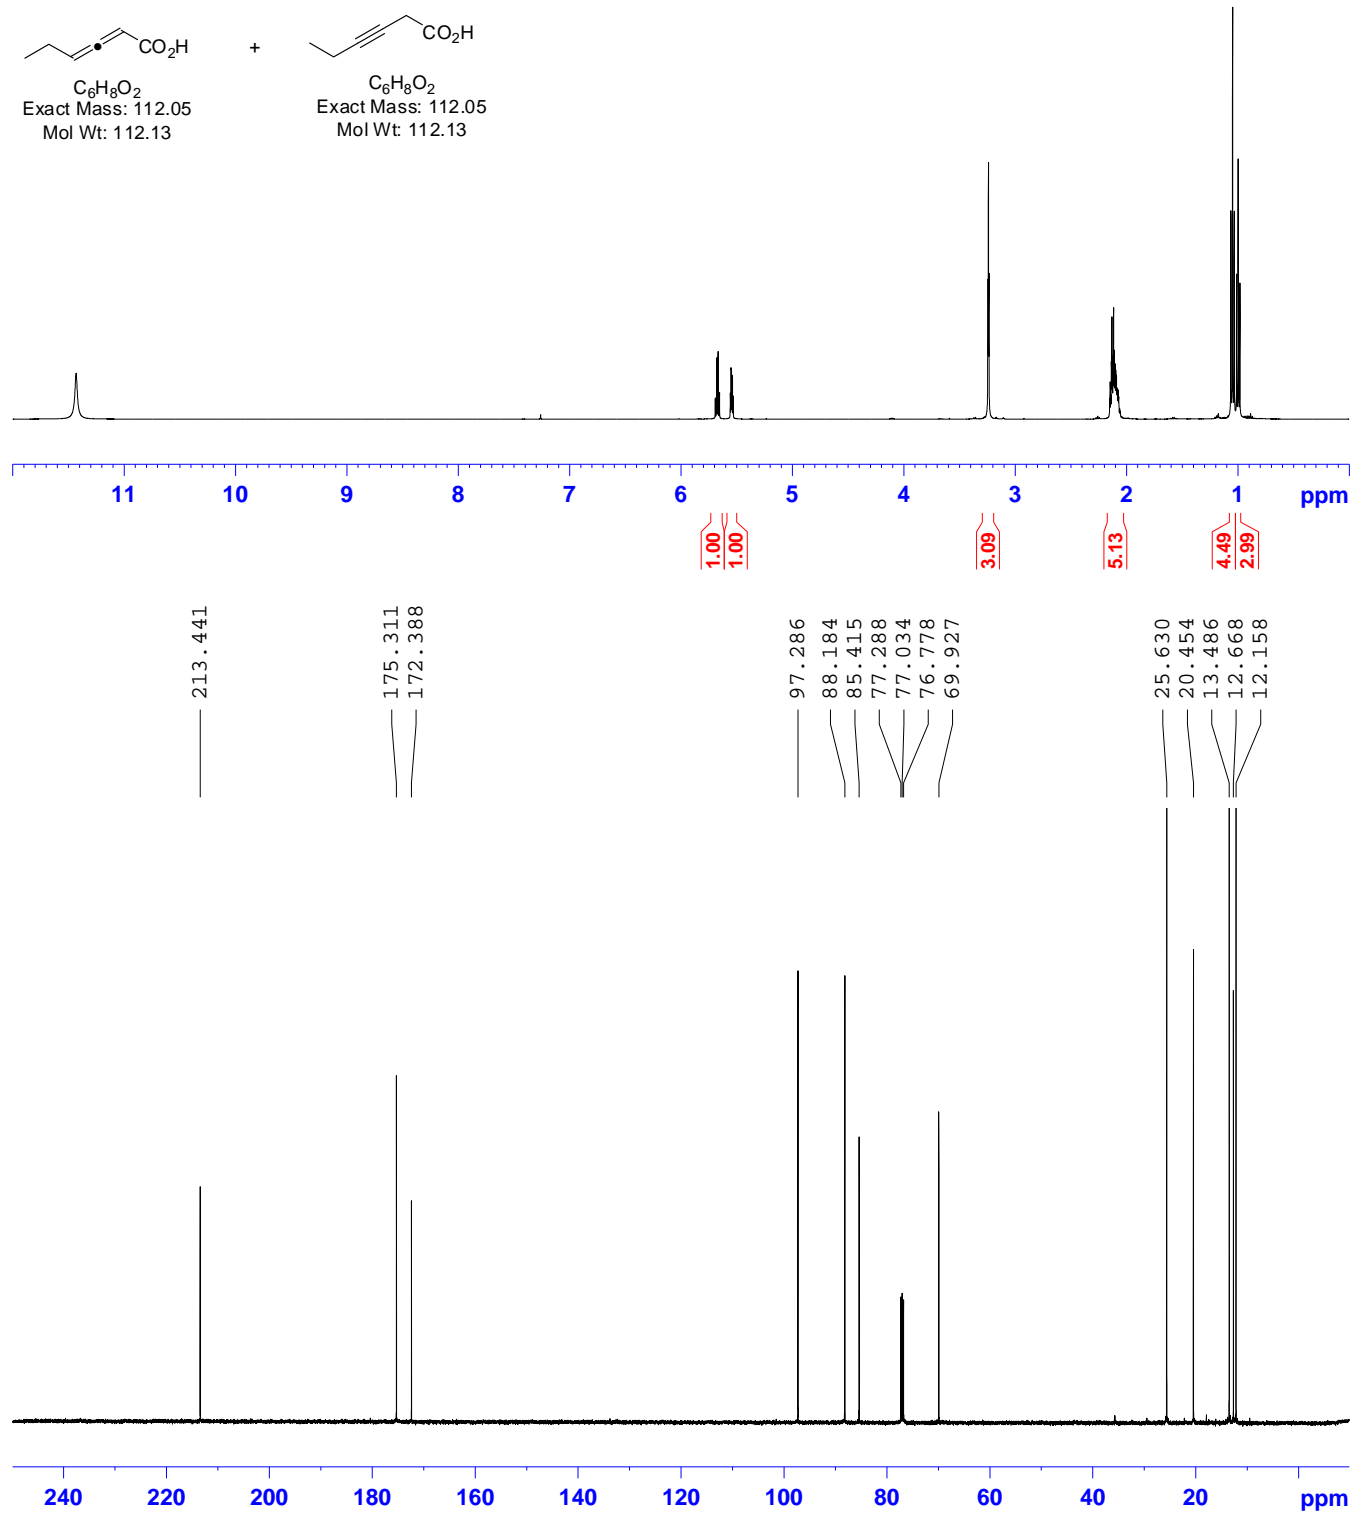

# 5-Cyclopentyl-penta-2,3-dienoic acid ethyl ester (Et-A11)

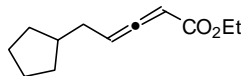

$C_{12}H_{18}O_2$   
Exact Mass: 194.13  
Mol. Wt.: 194.27

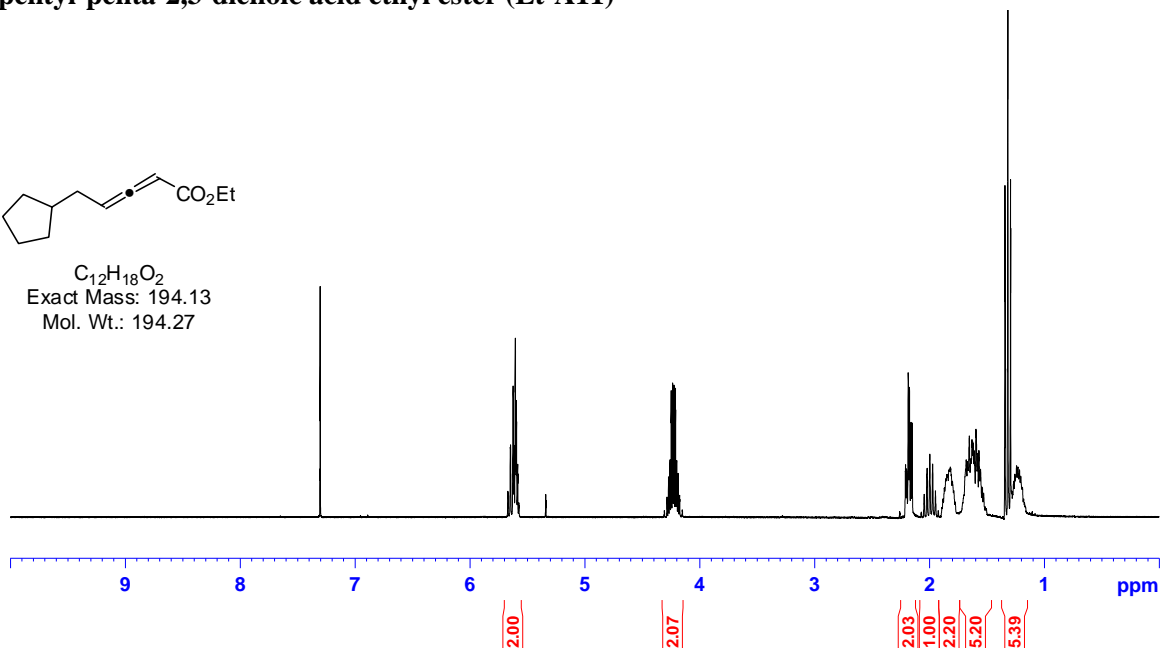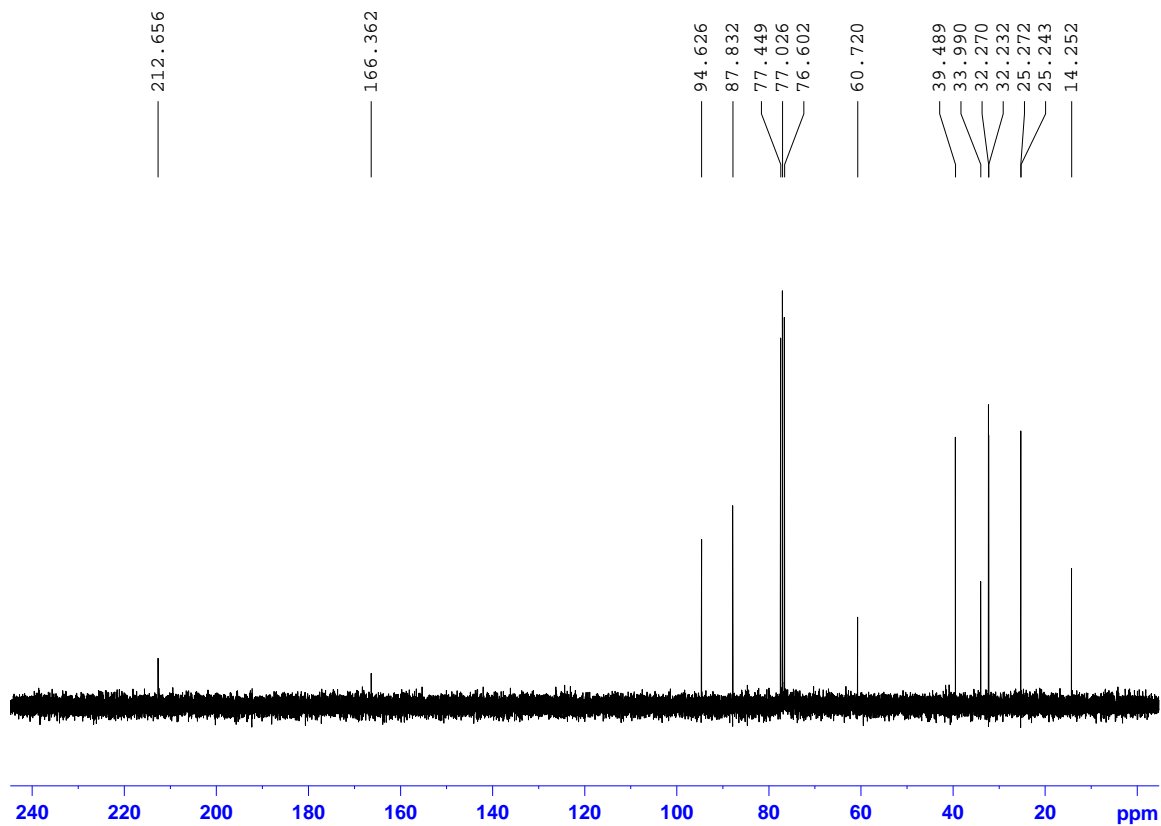

### 5-Cyclopentyl-penta-2,3-dienoic acid and 5-cyclopentyl-pent-3-ynoic acid (A11)

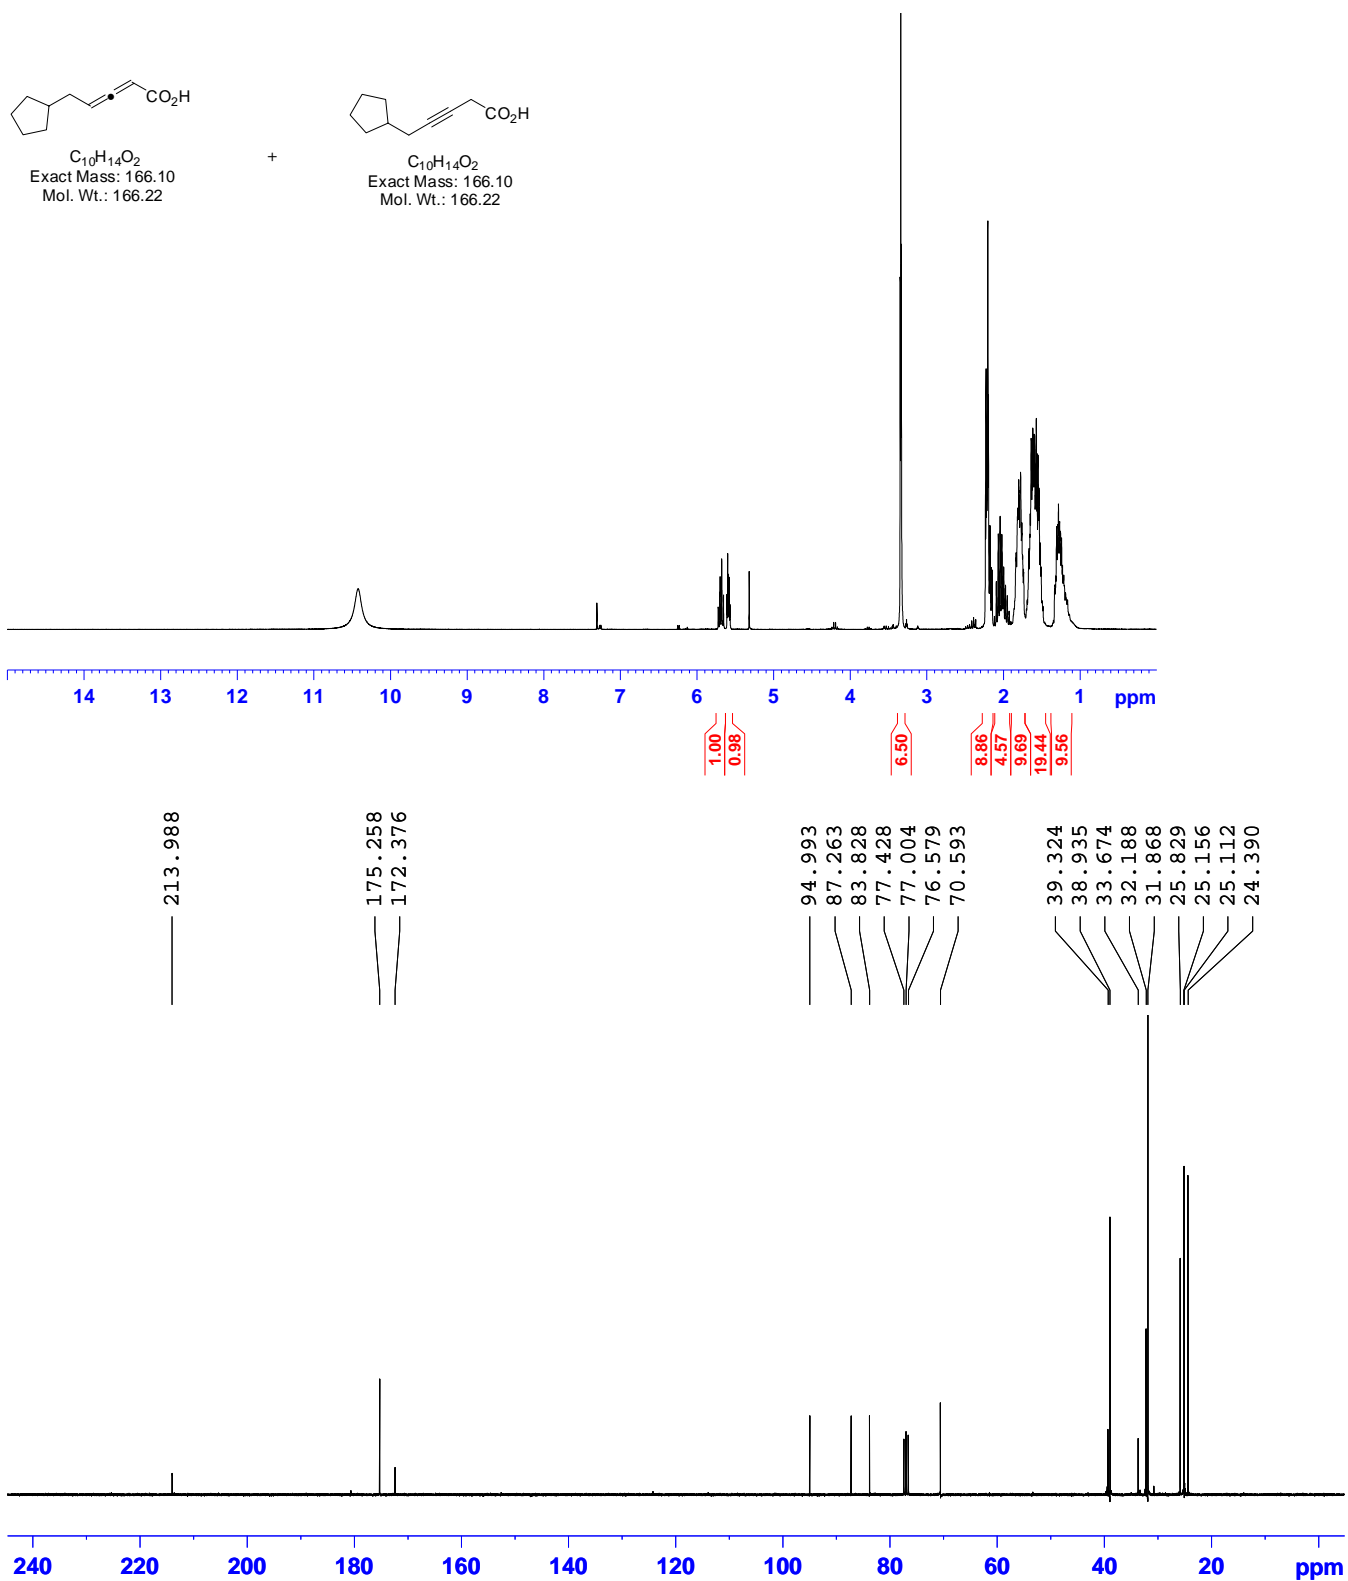

# 2-(2-Fluorobenzyl)-buta-2,3-dienoic acid (B03)

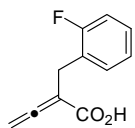

C<sub>11</sub>H<sub>9</sub>FO<sub>2</sub>  
Exact Mass: 192.06  
Mol. Wt.: 192.19

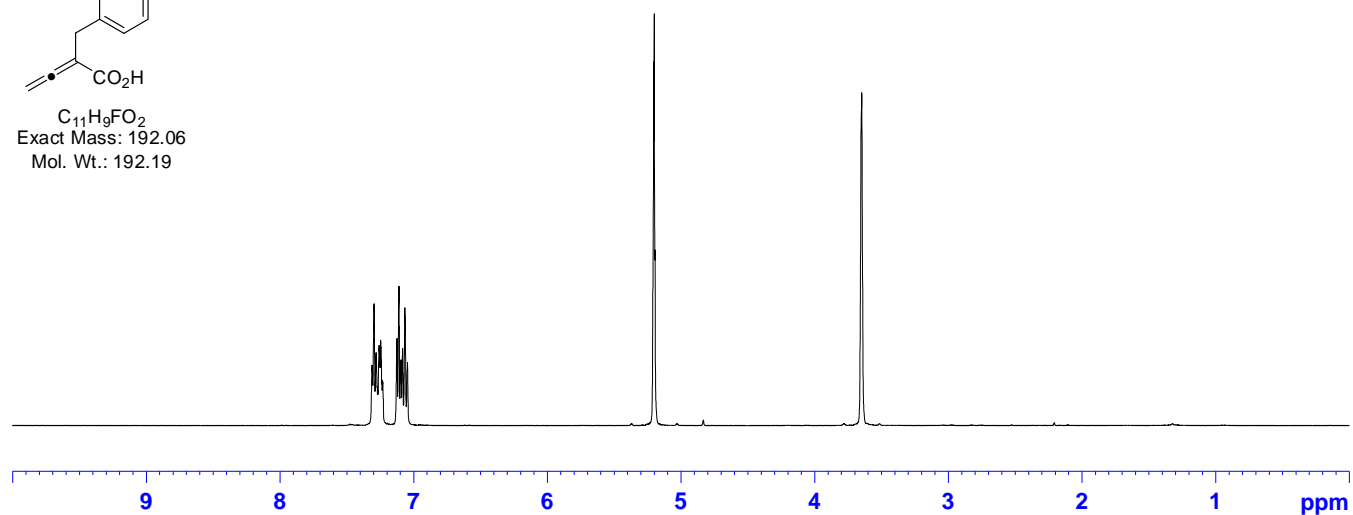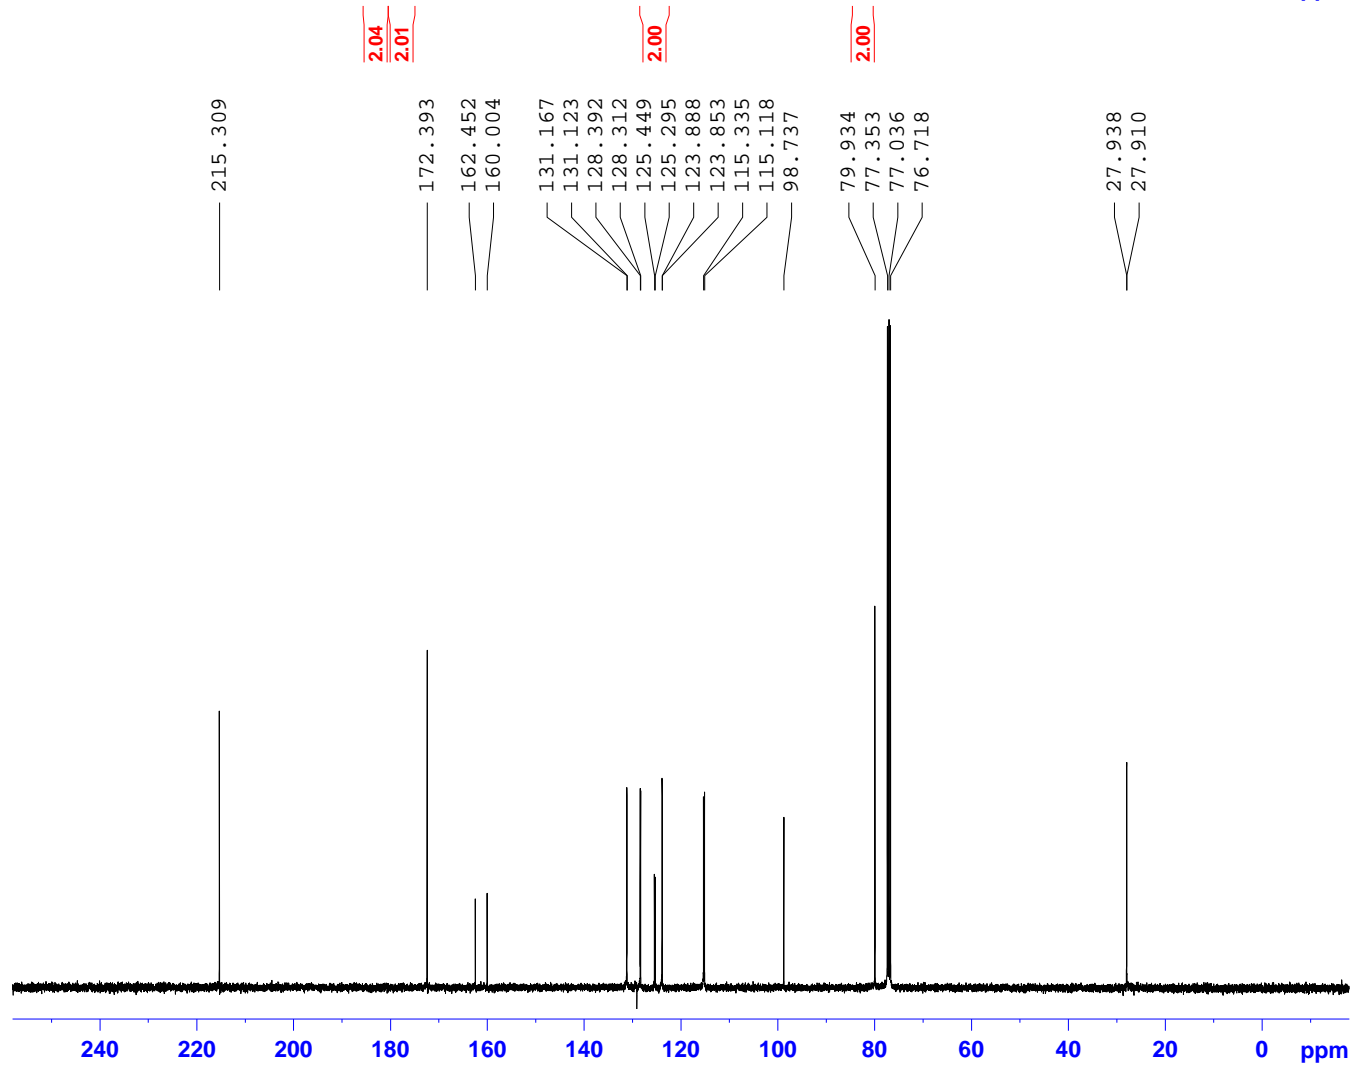

# 2-(3-Fluorobenzyl)-buta-2,3-dienoic acid (B04)

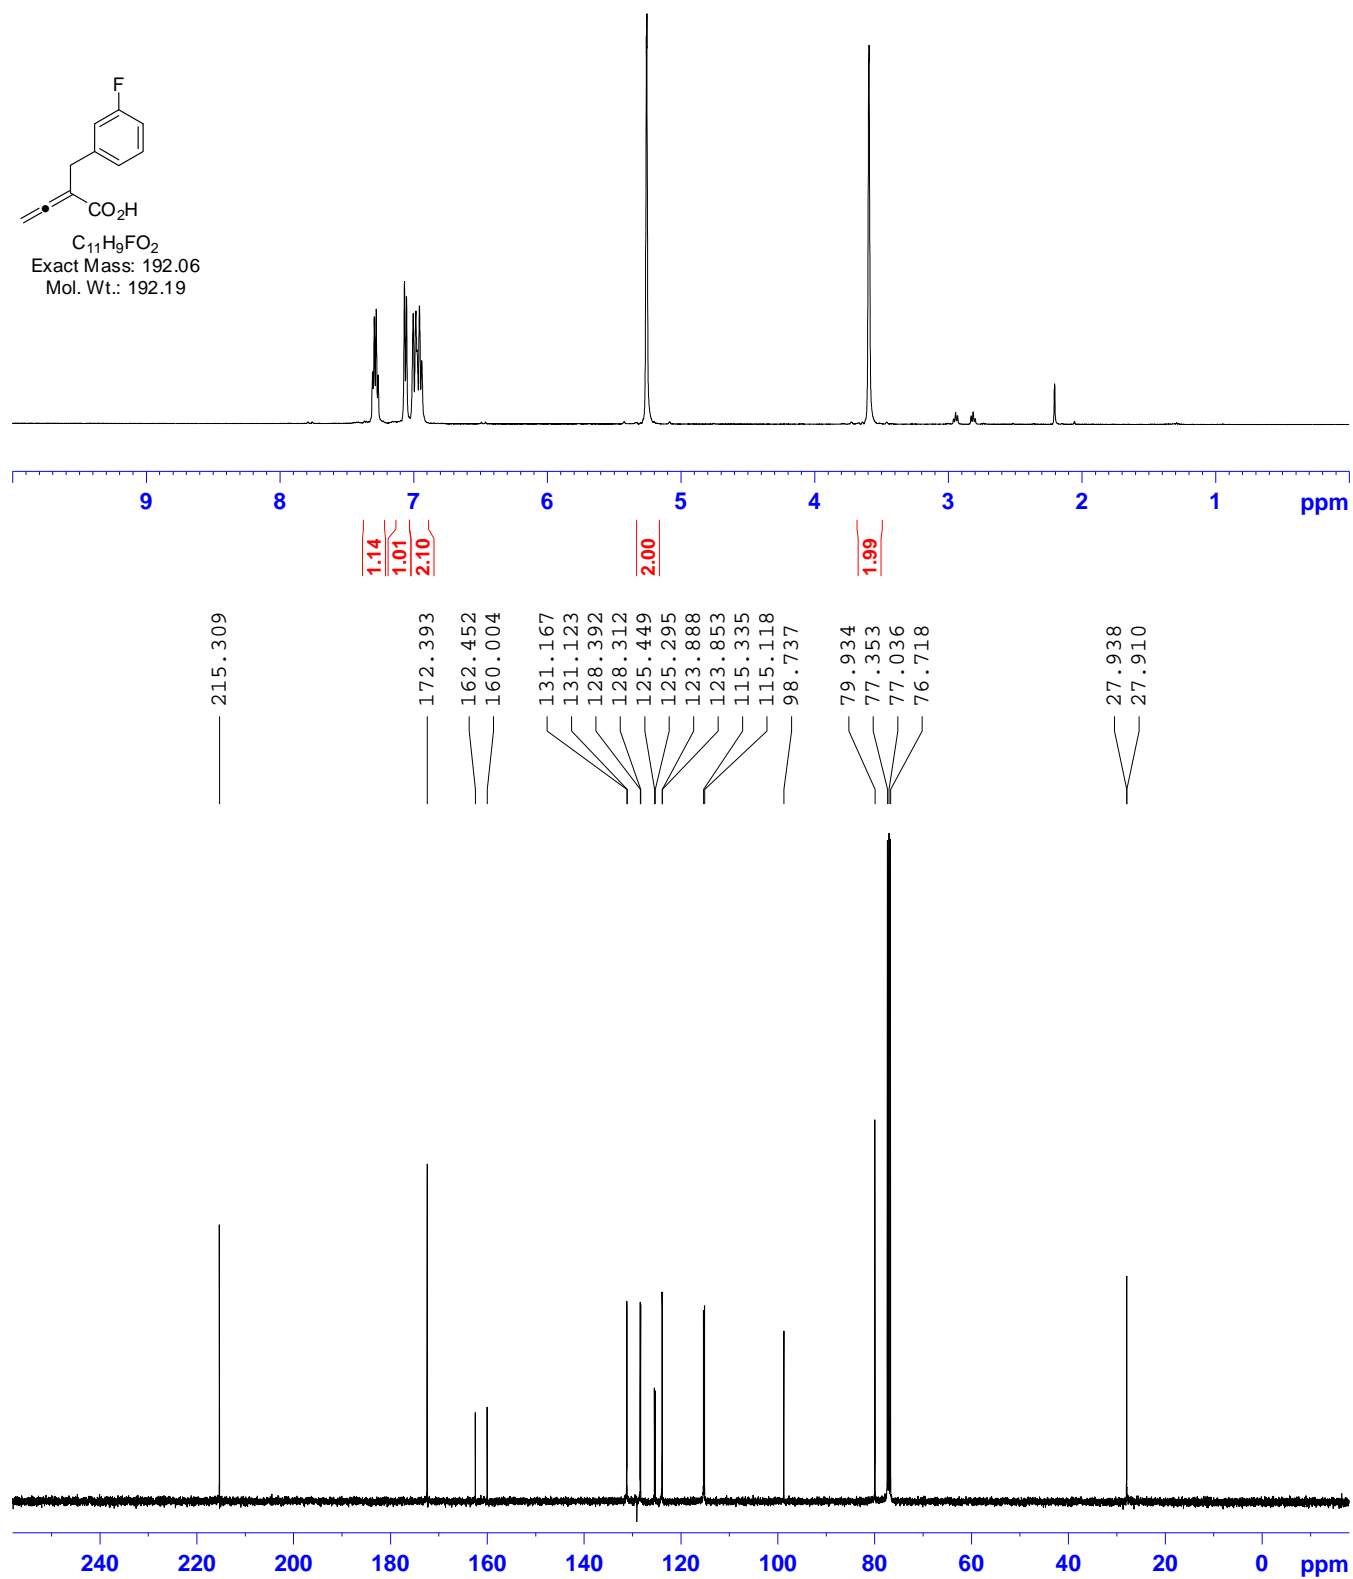

# 2-(3-Chlorobenzyl)-buta-2,3-dienoic acid (B05)

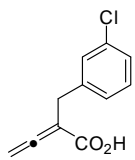

C<sub>11</sub>H<sub>9</sub>ClO<sub>2</sub>  
Exact Mass: 208.03  
Mol. Wt.: 208.64

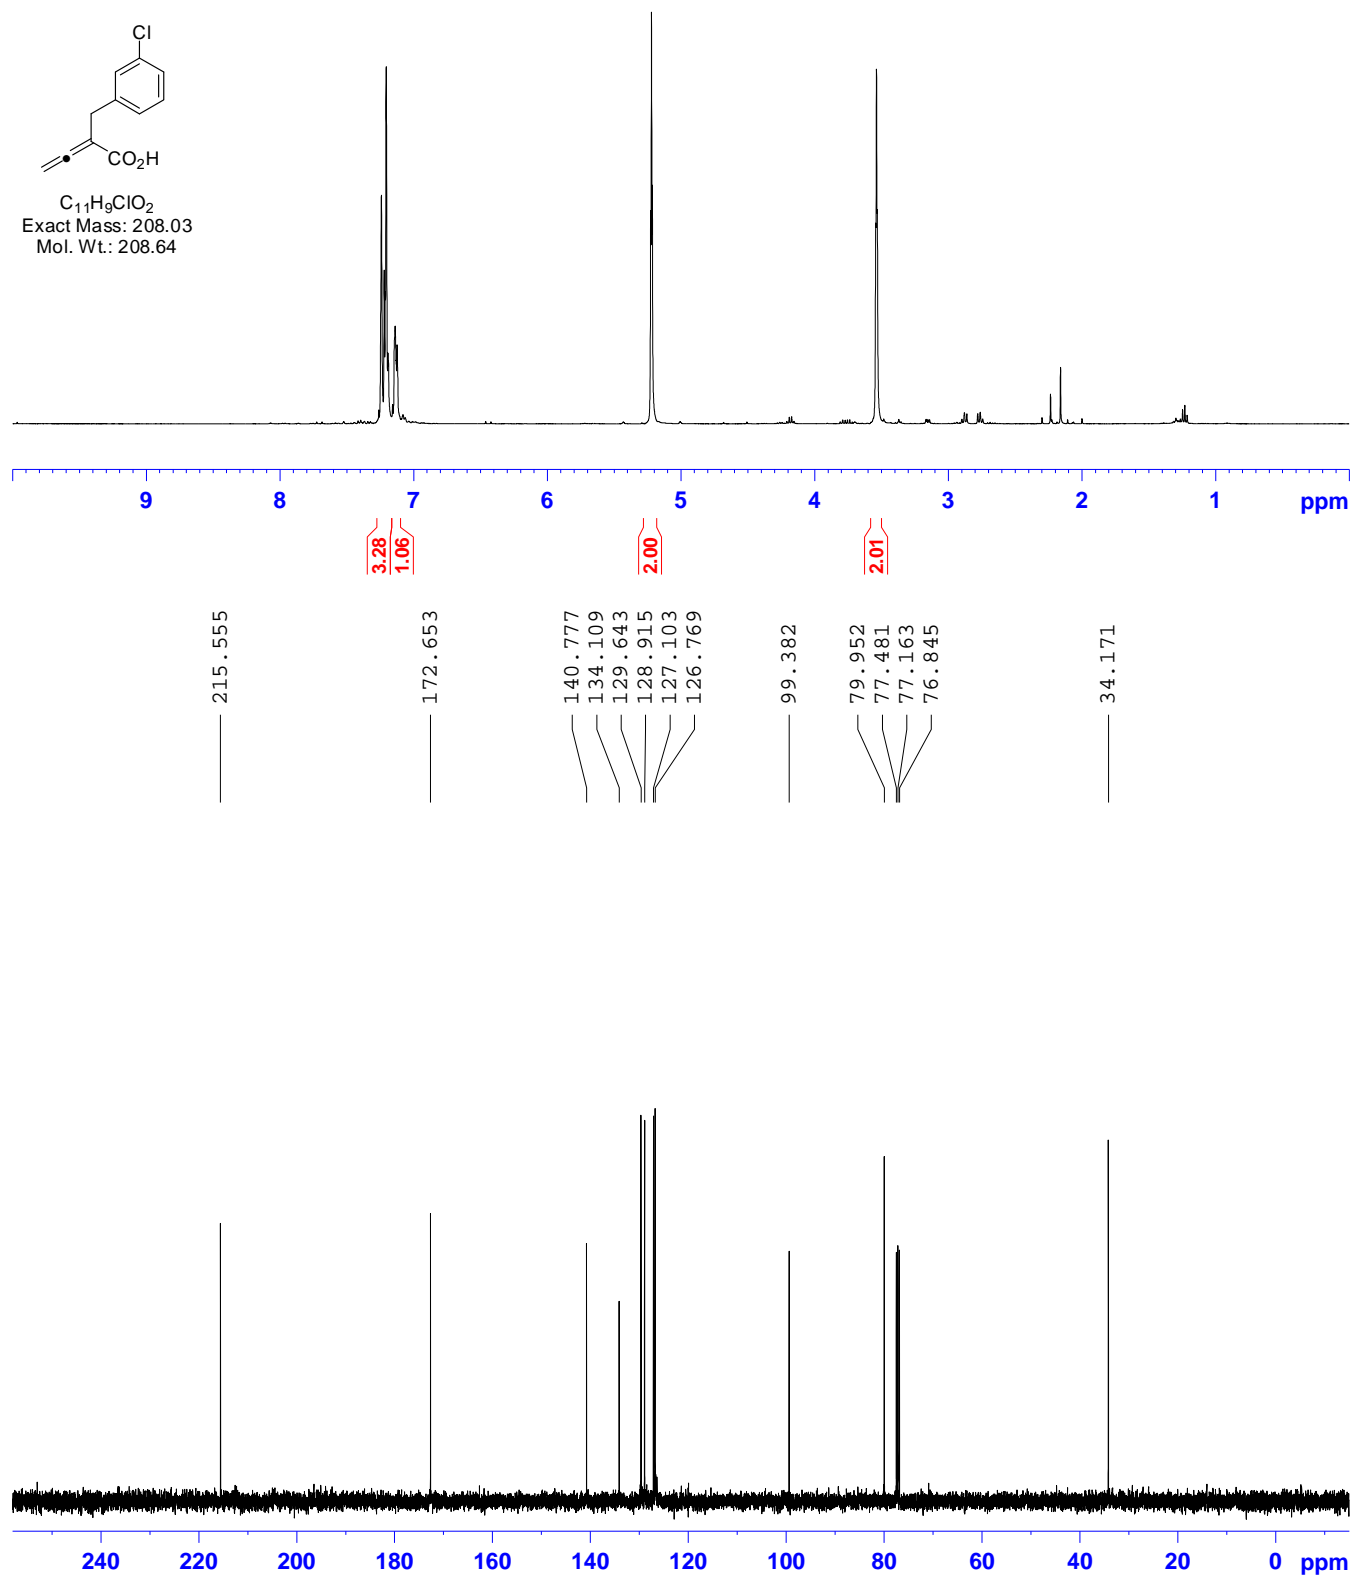

# 2-(3-Bromobenzyl)-buta-2,3-dienoic acid (B06)

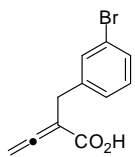

C<sub>11</sub>H<sub>9</sub>BrO<sub>2</sub>  
Exact Mass: 251.98  
Mol Wt: 253.09

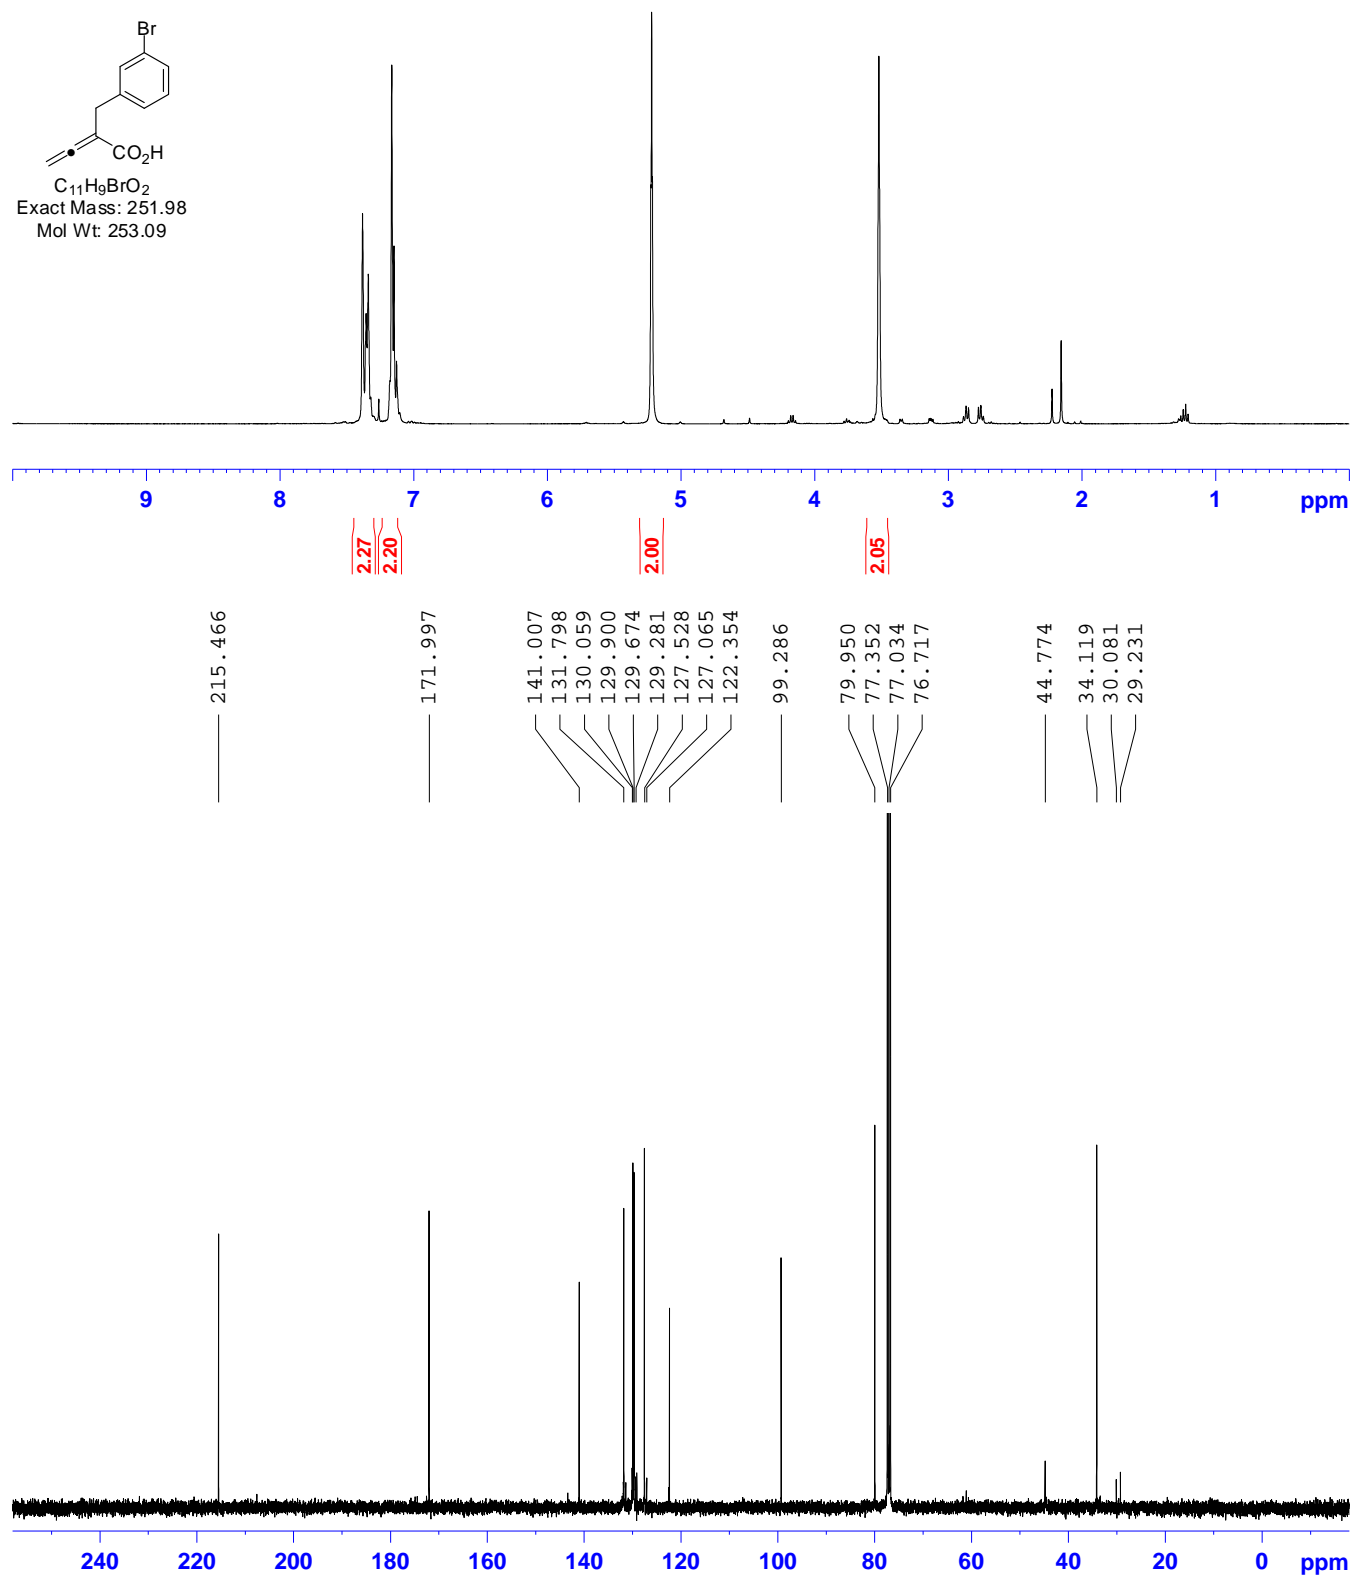



# 2-(3-Methylbenzyl)-buta-2,3-dienoic acid (B07)

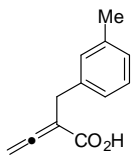

C<sub>12</sub>H<sub>12</sub>O<sub>2</sub>  
Exact Mass: 188.08  
Mol. Wt.: 188.22

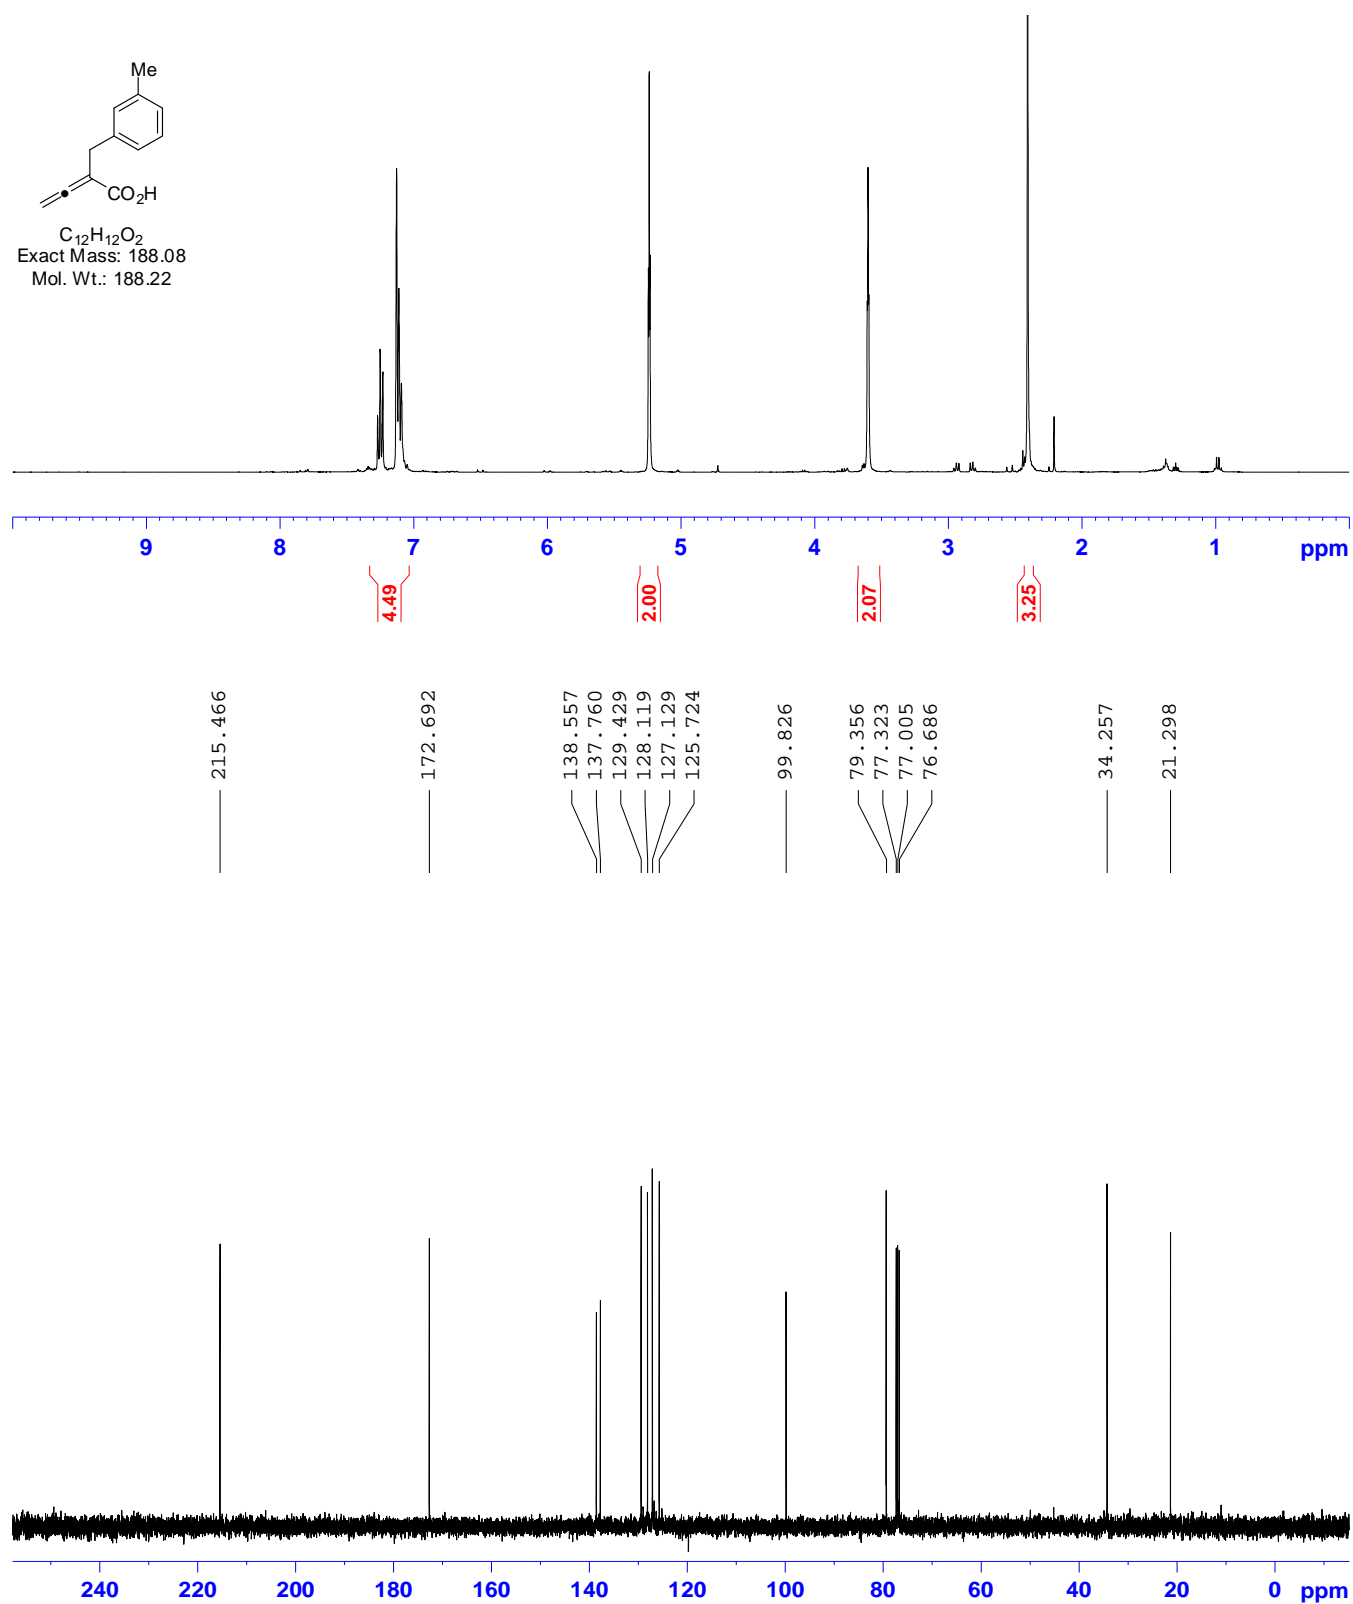

# 2-(4-Fluorobenzyl)-buta-2,3-dienoic acid (B08)

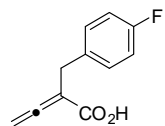

$C_{11}H_9FO_2$   
Exact Mass: 192.06  
Mol. Wt.: 192.19

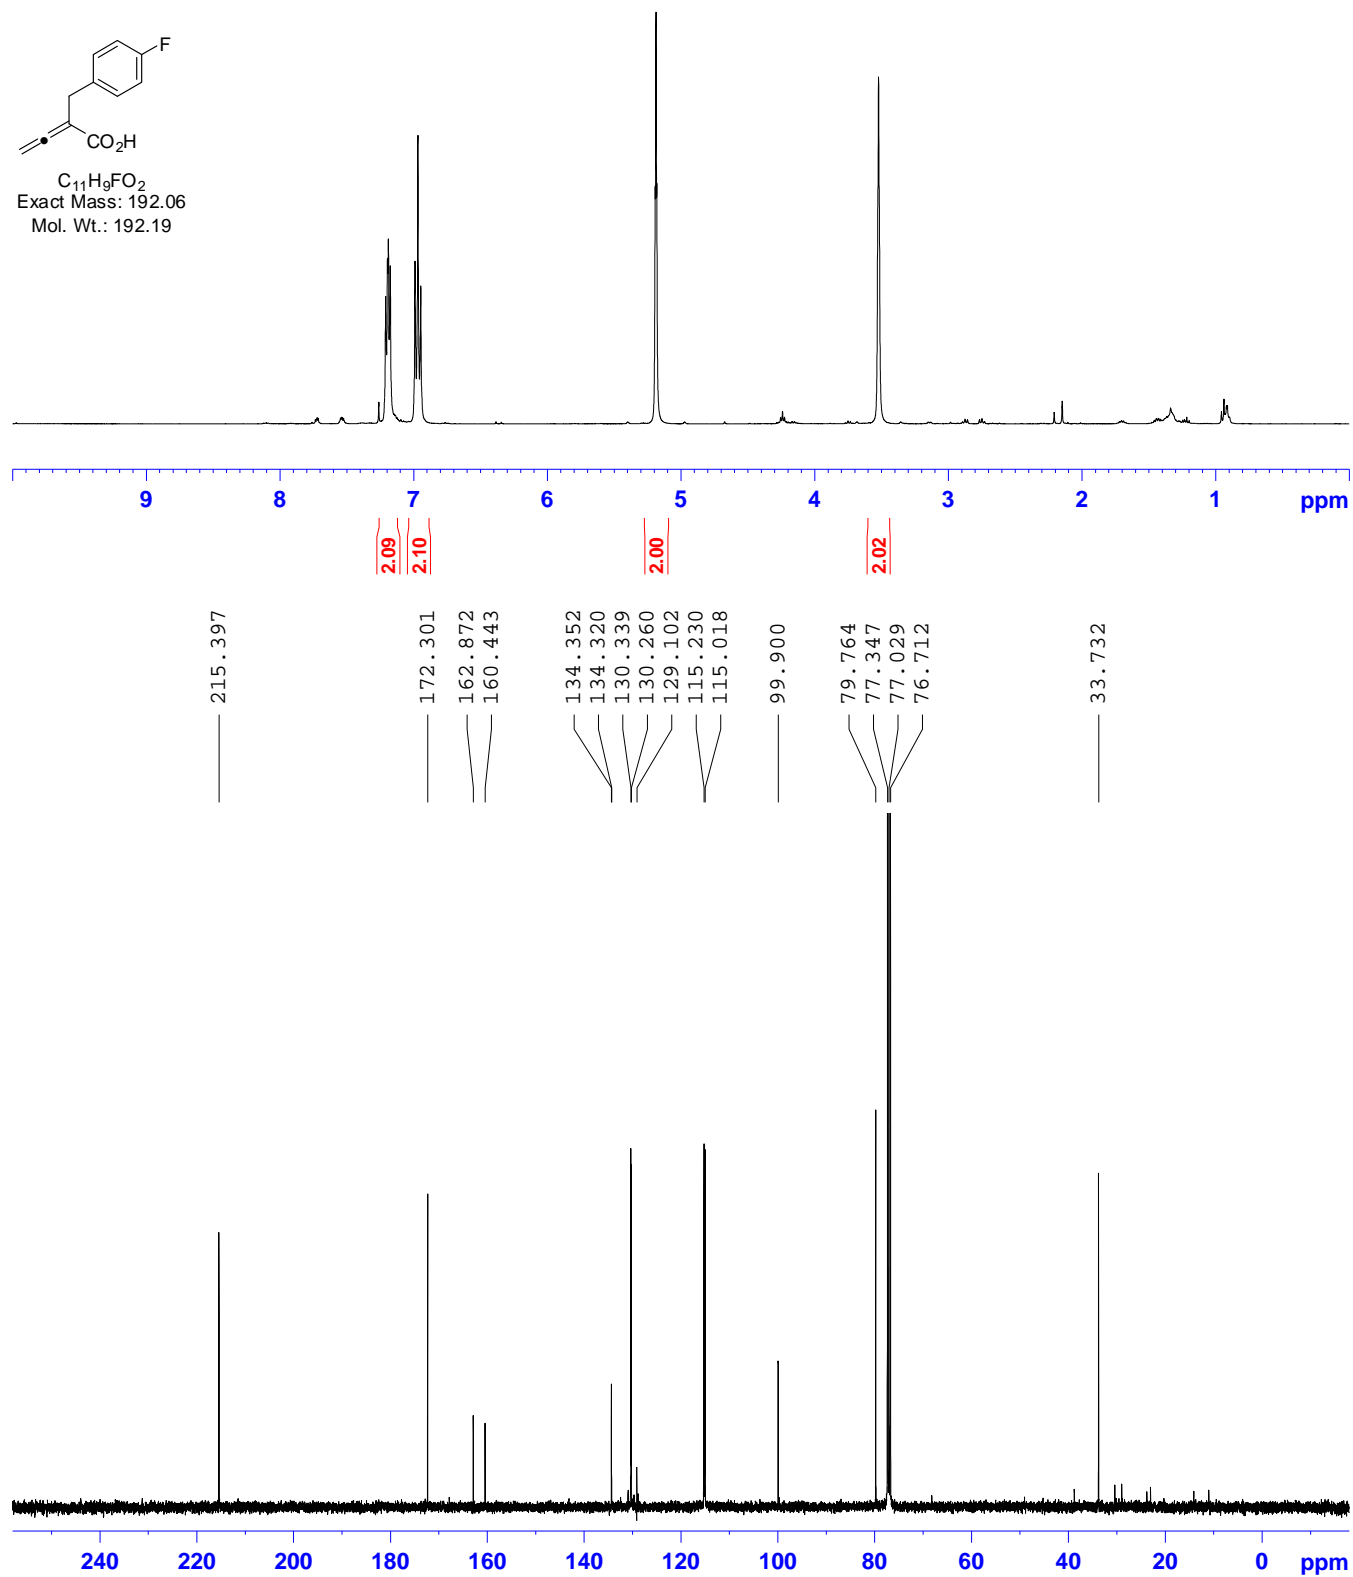

# 2-(4-Chlorobenzyl)-buta-2,3-dienoic acid (B09)

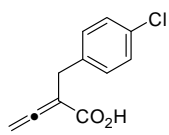

C<sub>11</sub>H<sub>9</sub>ClO<sub>2</sub>  
Exact Mass: 208.03  
Mol. Wt.: 208.64

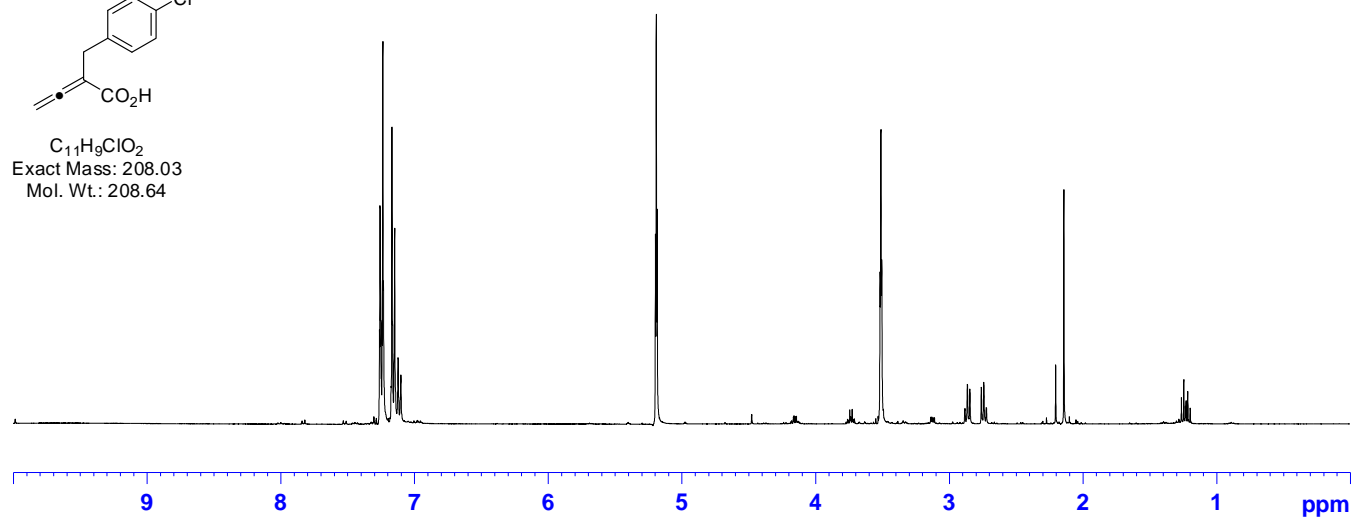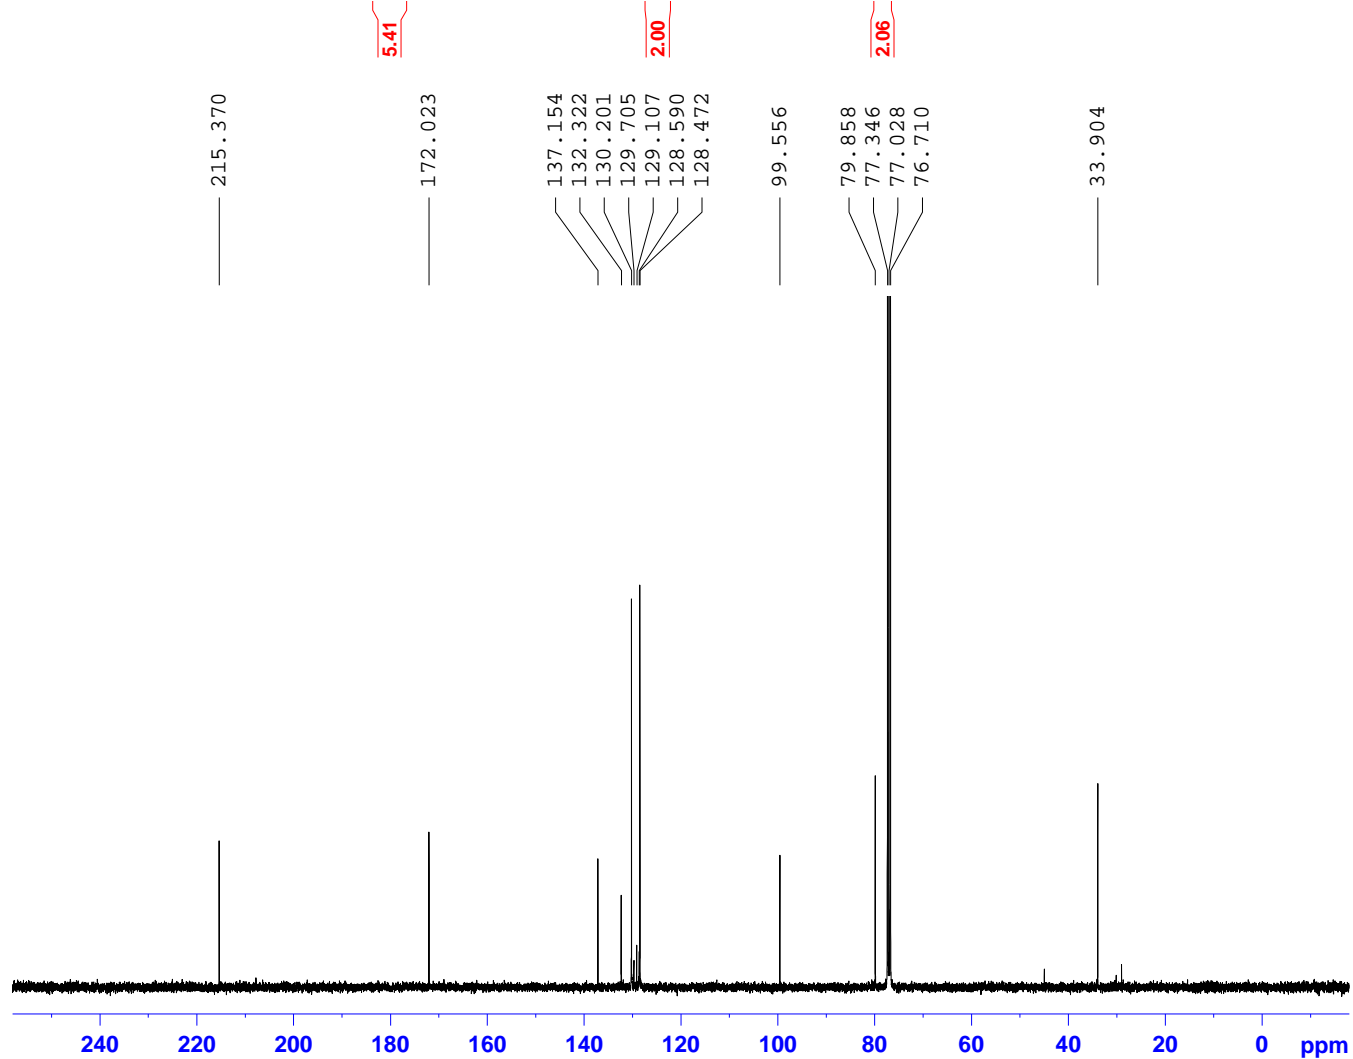

## 2-(4-bromobenzyl)-buta-2,3-dienoic acid (B10)

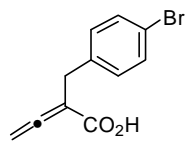

$C_{11}H_9BrO_2$   
Exact Mass: 251.98  
Mol Wt: 253.09

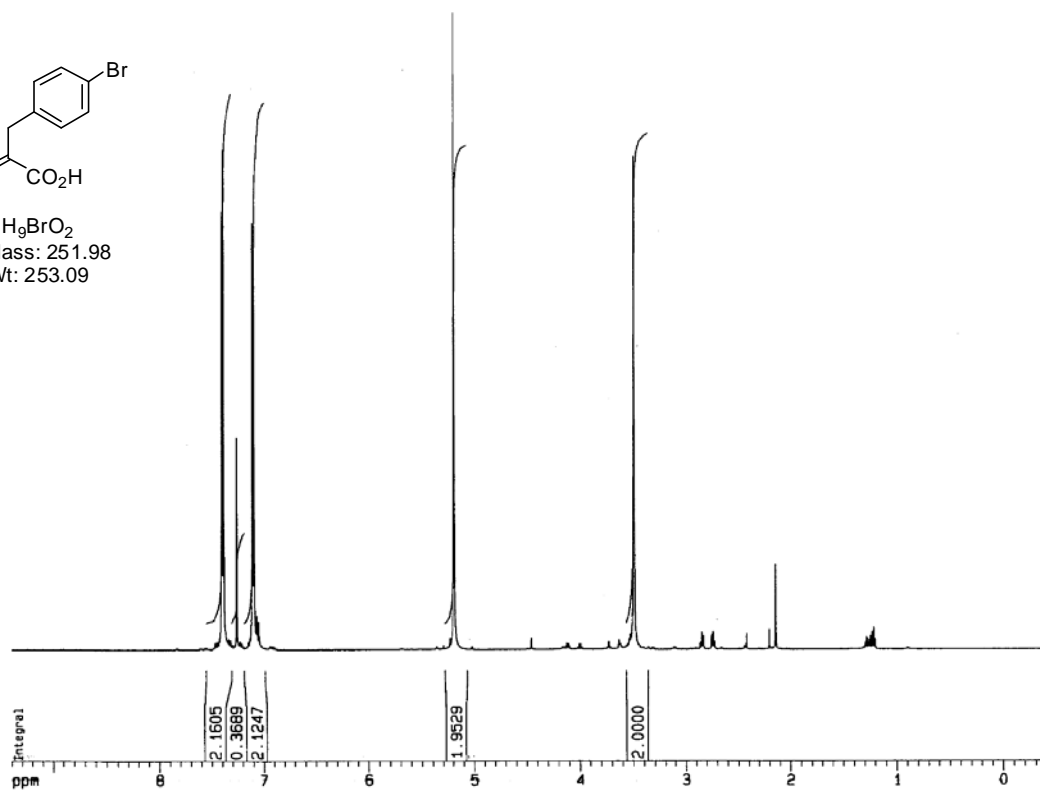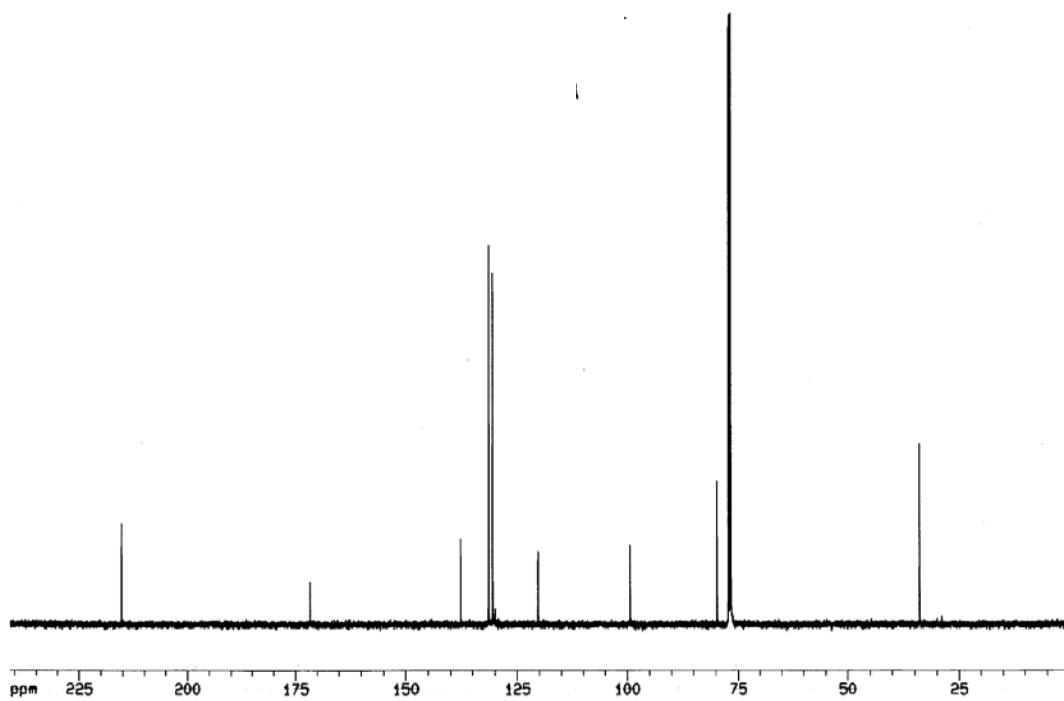

# 2-(4-Methylbenzyl)-buta-2,3-dienoic acid (B11)

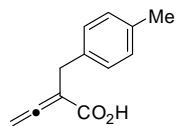

$C_{12}H_{12}O_2$   
Exact Mass: 188.08  
Mol. Wt.: 188.22

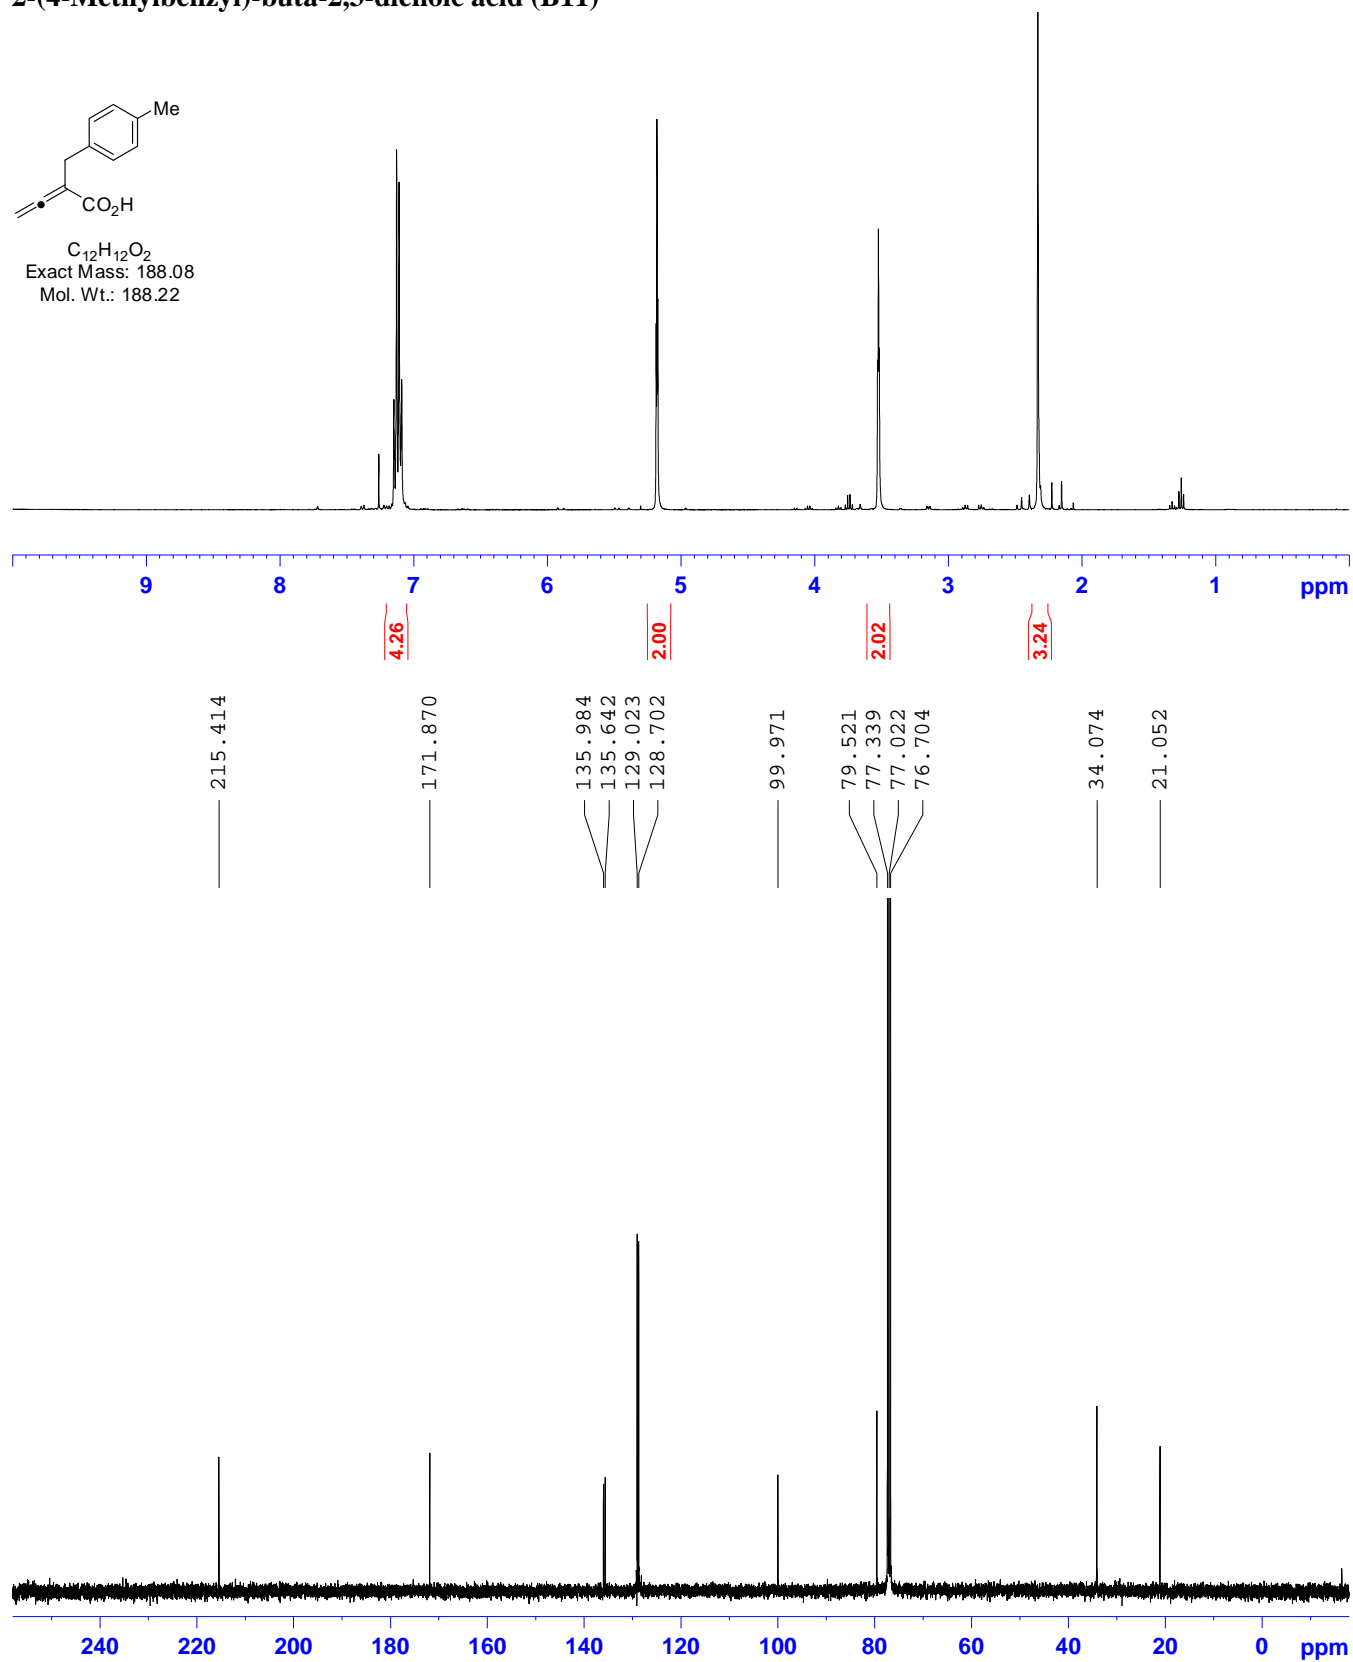

# 2-(4-*t*-Butylbenzyl)-buta-2,3-dienoic acid (B12)

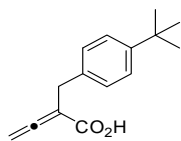

C<sub>15</sub>H<sub>18</sub>O<sub>2</sub>  
Exact Mass: 230.13  
Mol. Wt.: 230.30

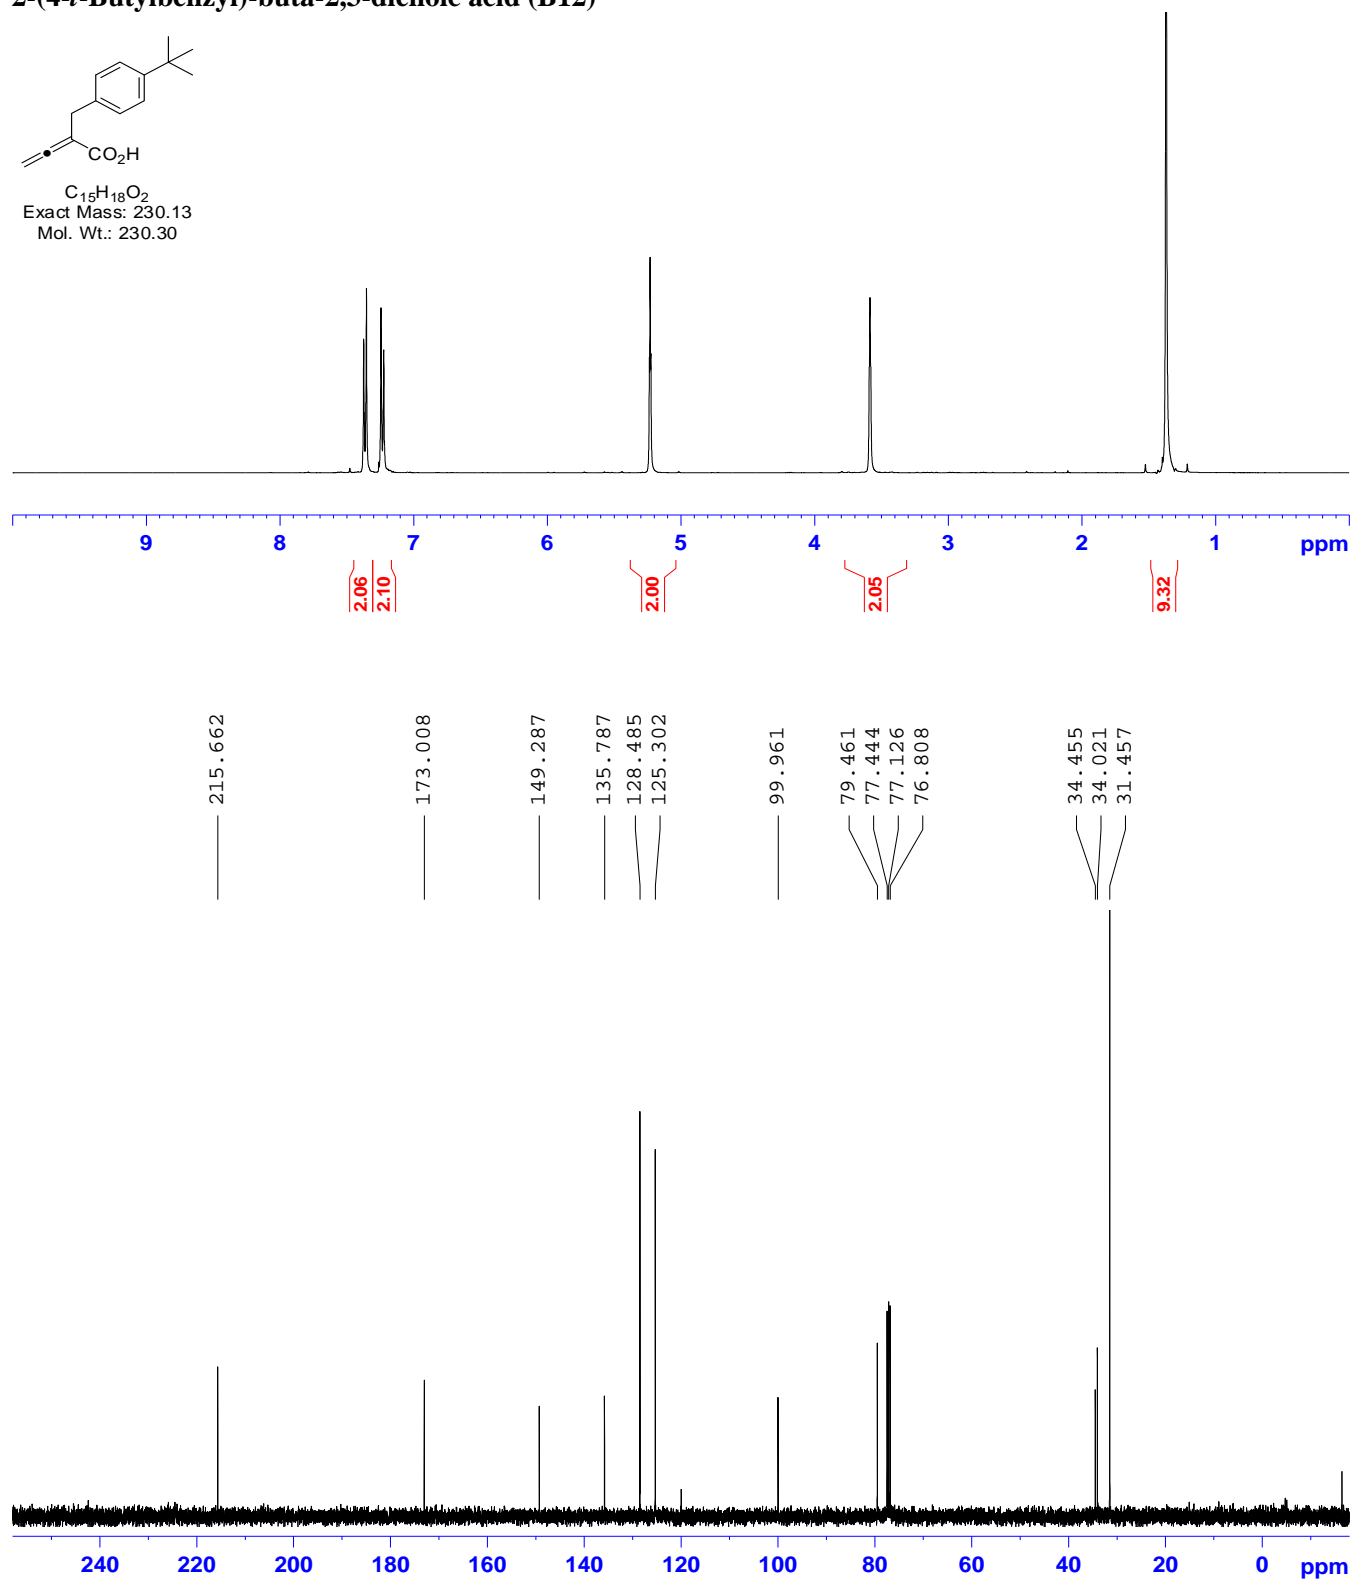

# N-(2-Fluorobenzylidene)-4-methylbenzenesulfonamide (C10)

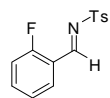

C<sub>14</sub>H<sub>12</sub>FNO<sub>2</sub>S  
Exact Mass: 277.06  
Mol. Wt.: 277.31

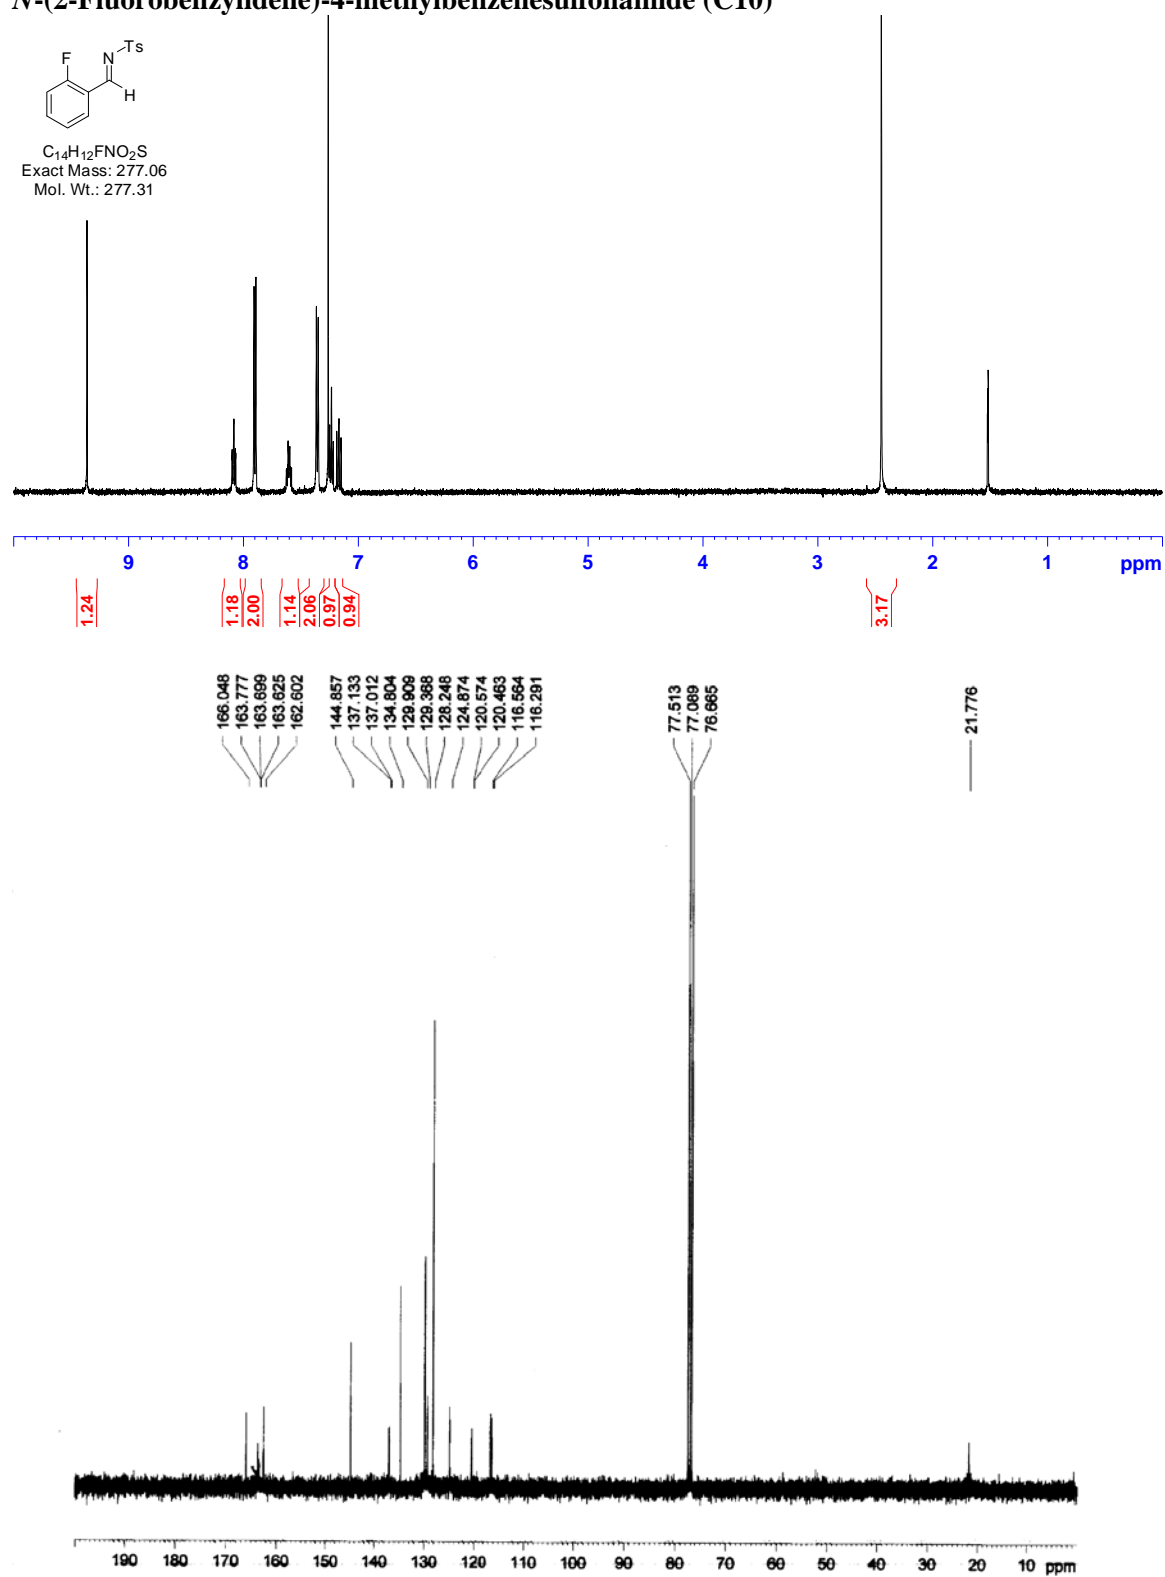

# 2-[(4-Methoxybenzylidene)-sulfamoyl]-benzoic acid methyl ester (C34)

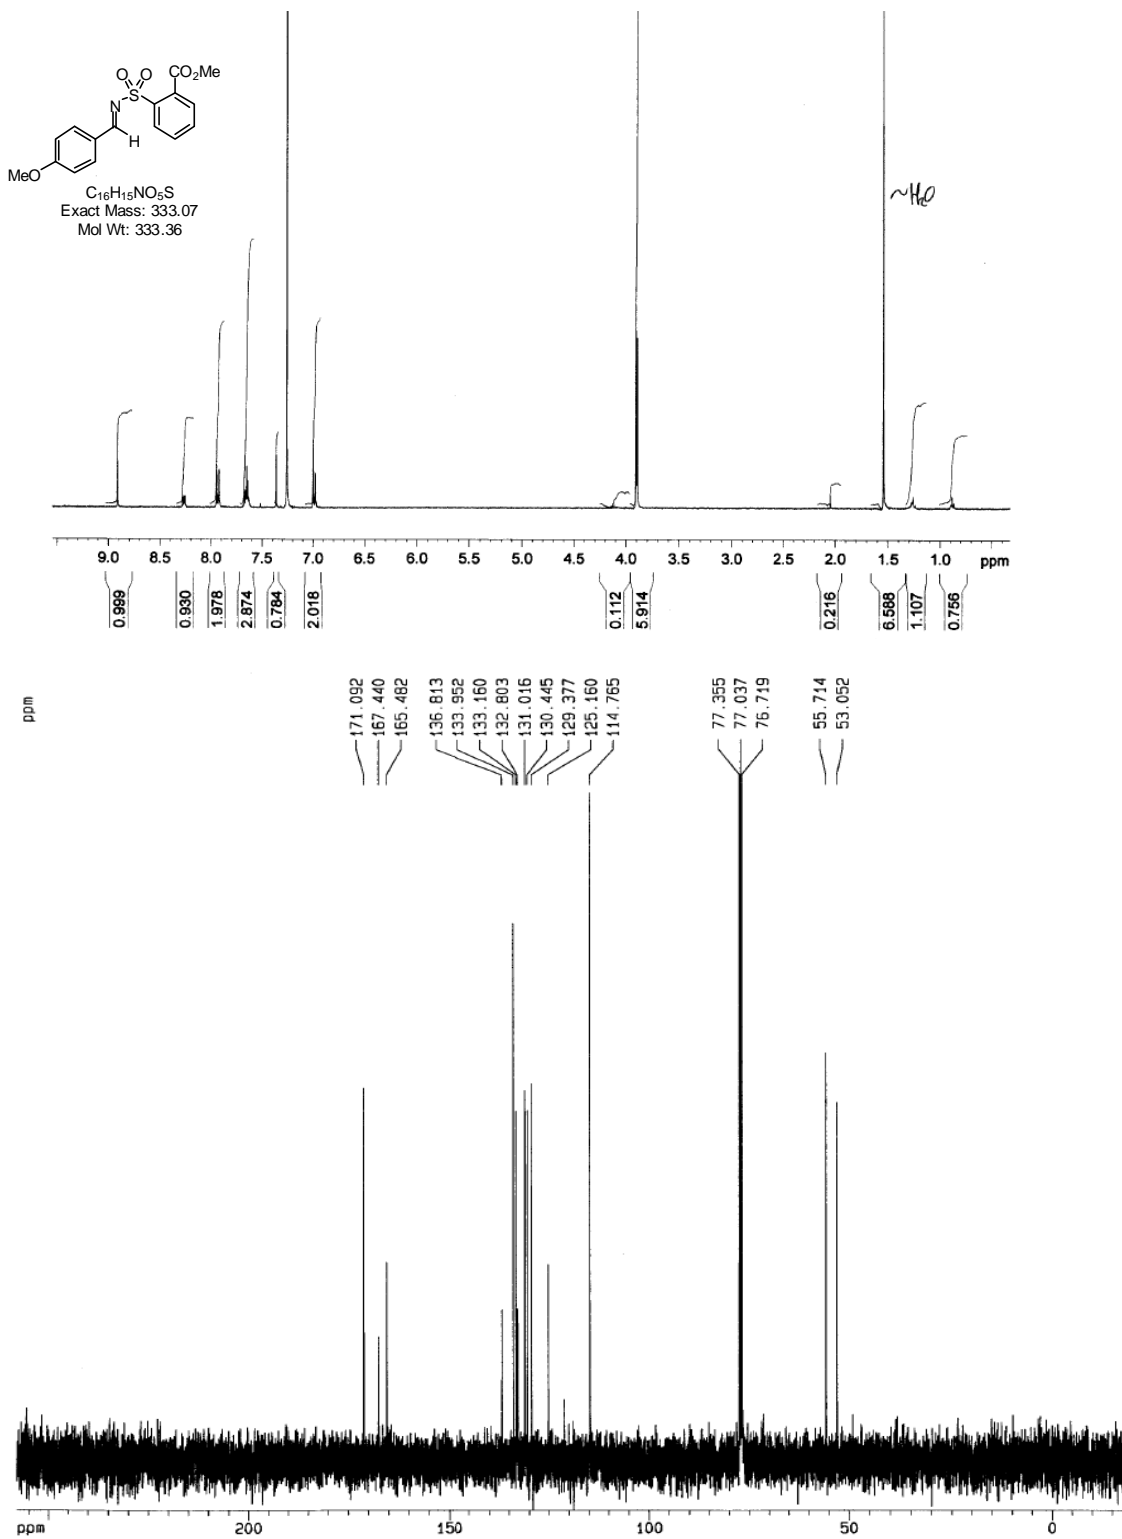



# *N*-(4-Methylbenzylidene)-2-nitrobenzenesulfonamide (C36)

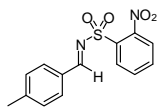

C<sub>14</sub>H<sub>12</sub>N<sub>2</sub>O<sub>4</sub>S  
Exact Mass: 304.05  
Mol Wt: 304.32

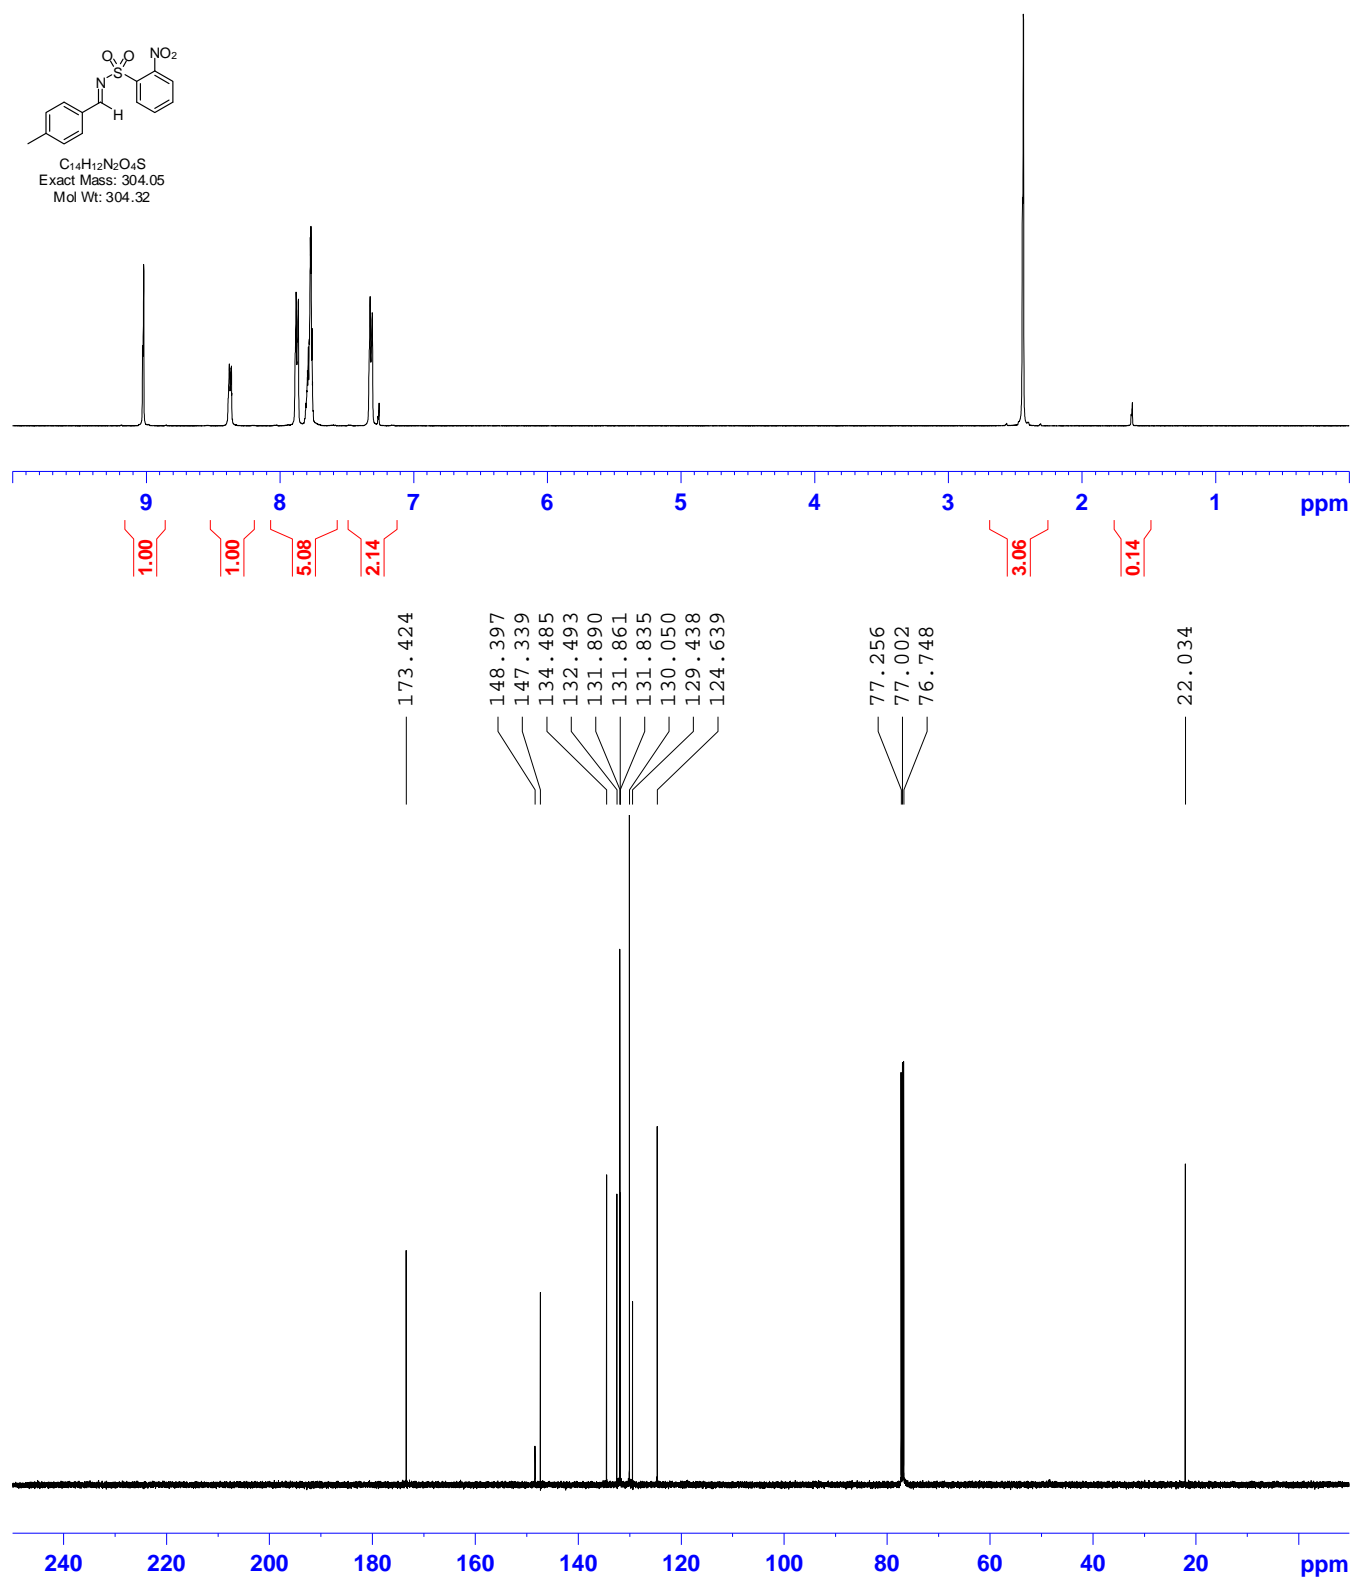

# 4-Chloro-N-(4-methoxybenzylidene)-benzenesulfonamide (C37)

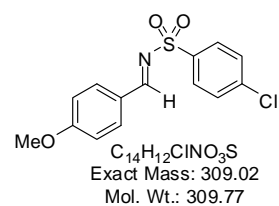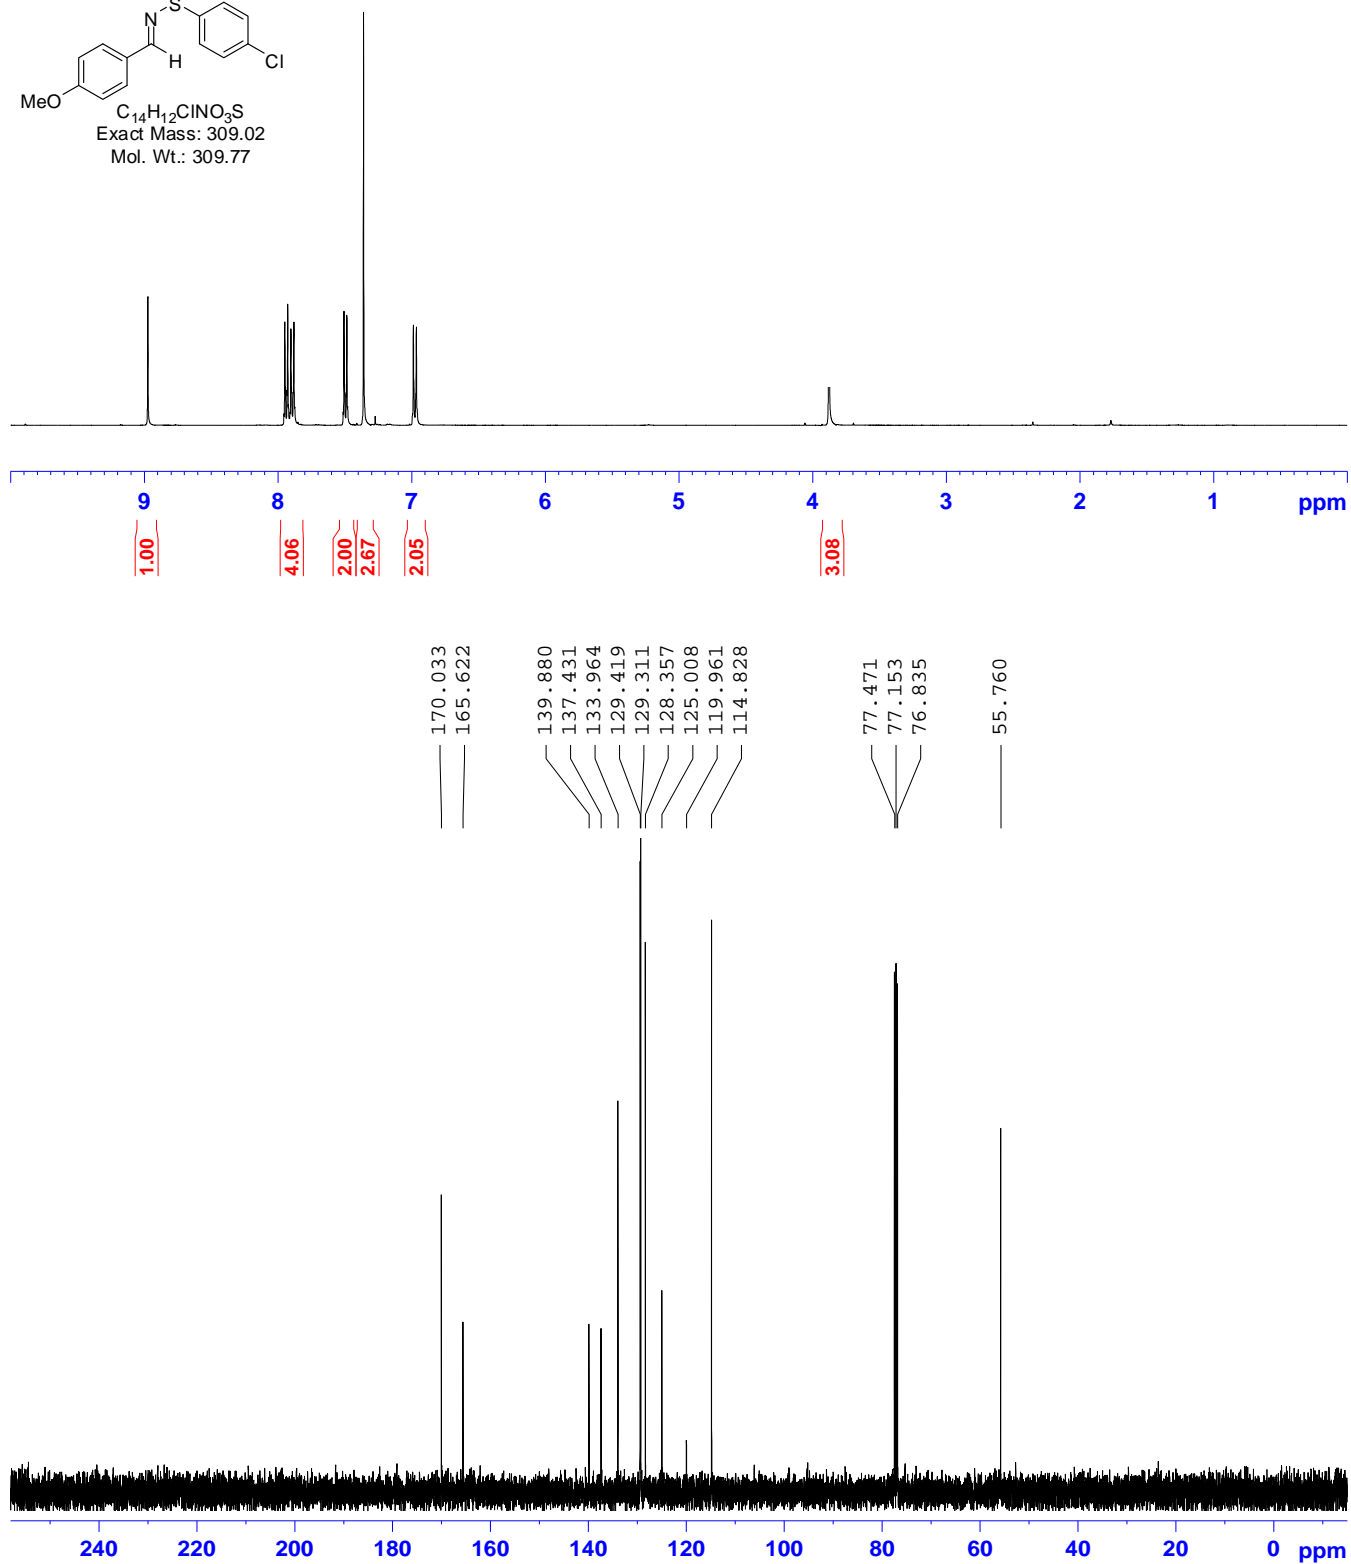

# *N*-(4-Methoxybenzylidene)-2-methylbenzenesulfonamide (C38)

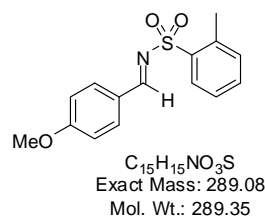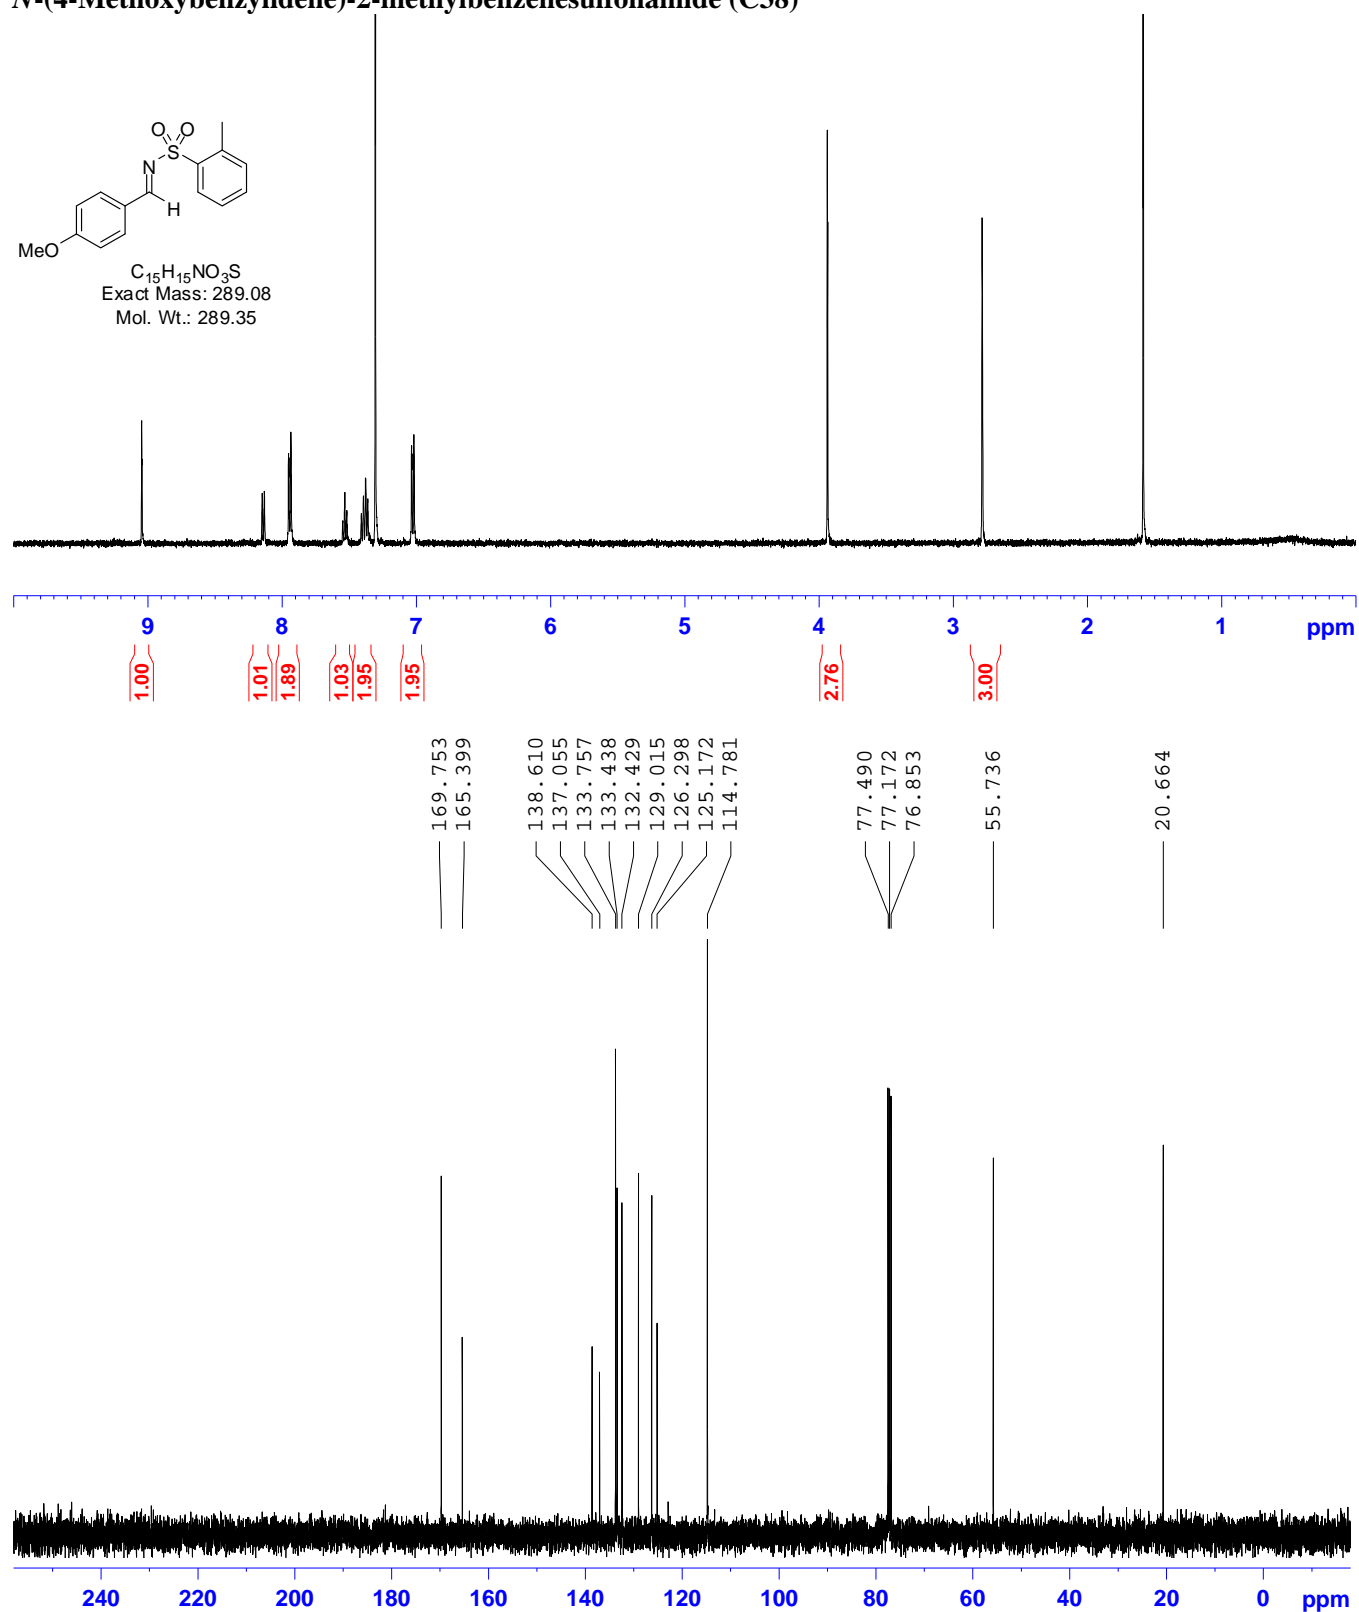

# *N*-(4-Chlorobenzylidene)-2-methylbenzenesulfonamide (C40)

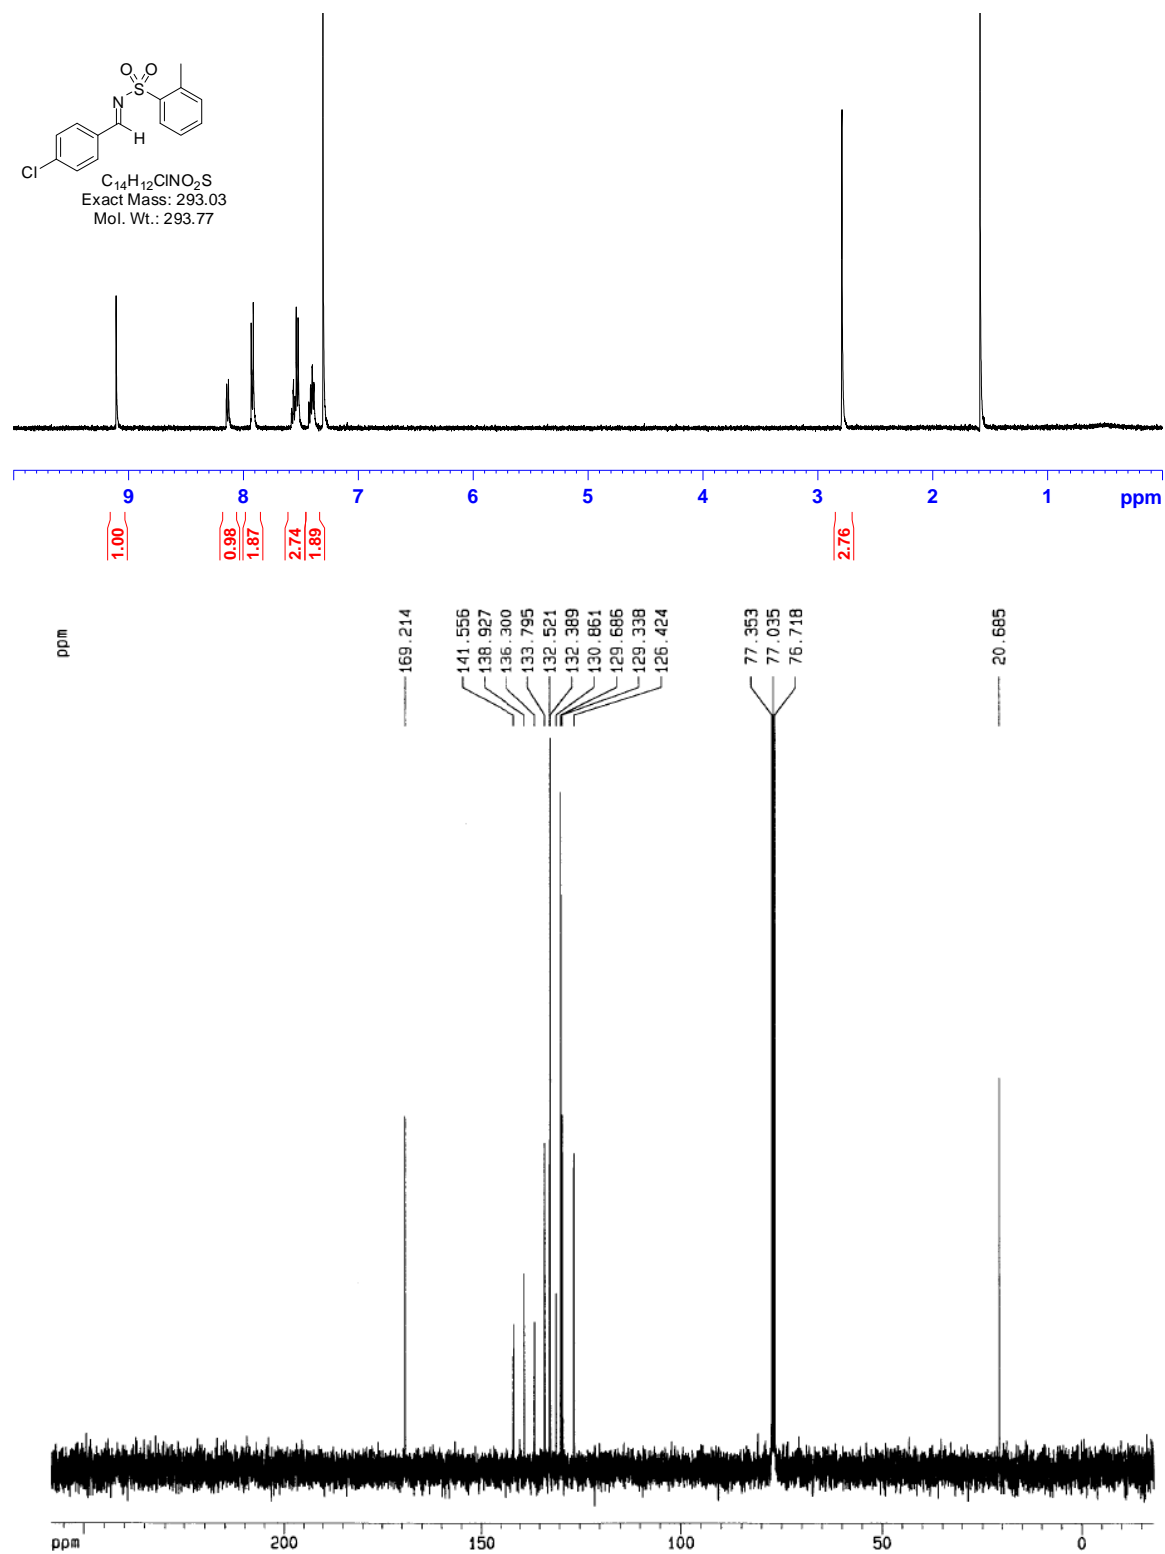

# 2-Methyl-N-(4-methylbenzylidene)-benzenesulfonamide (C41)

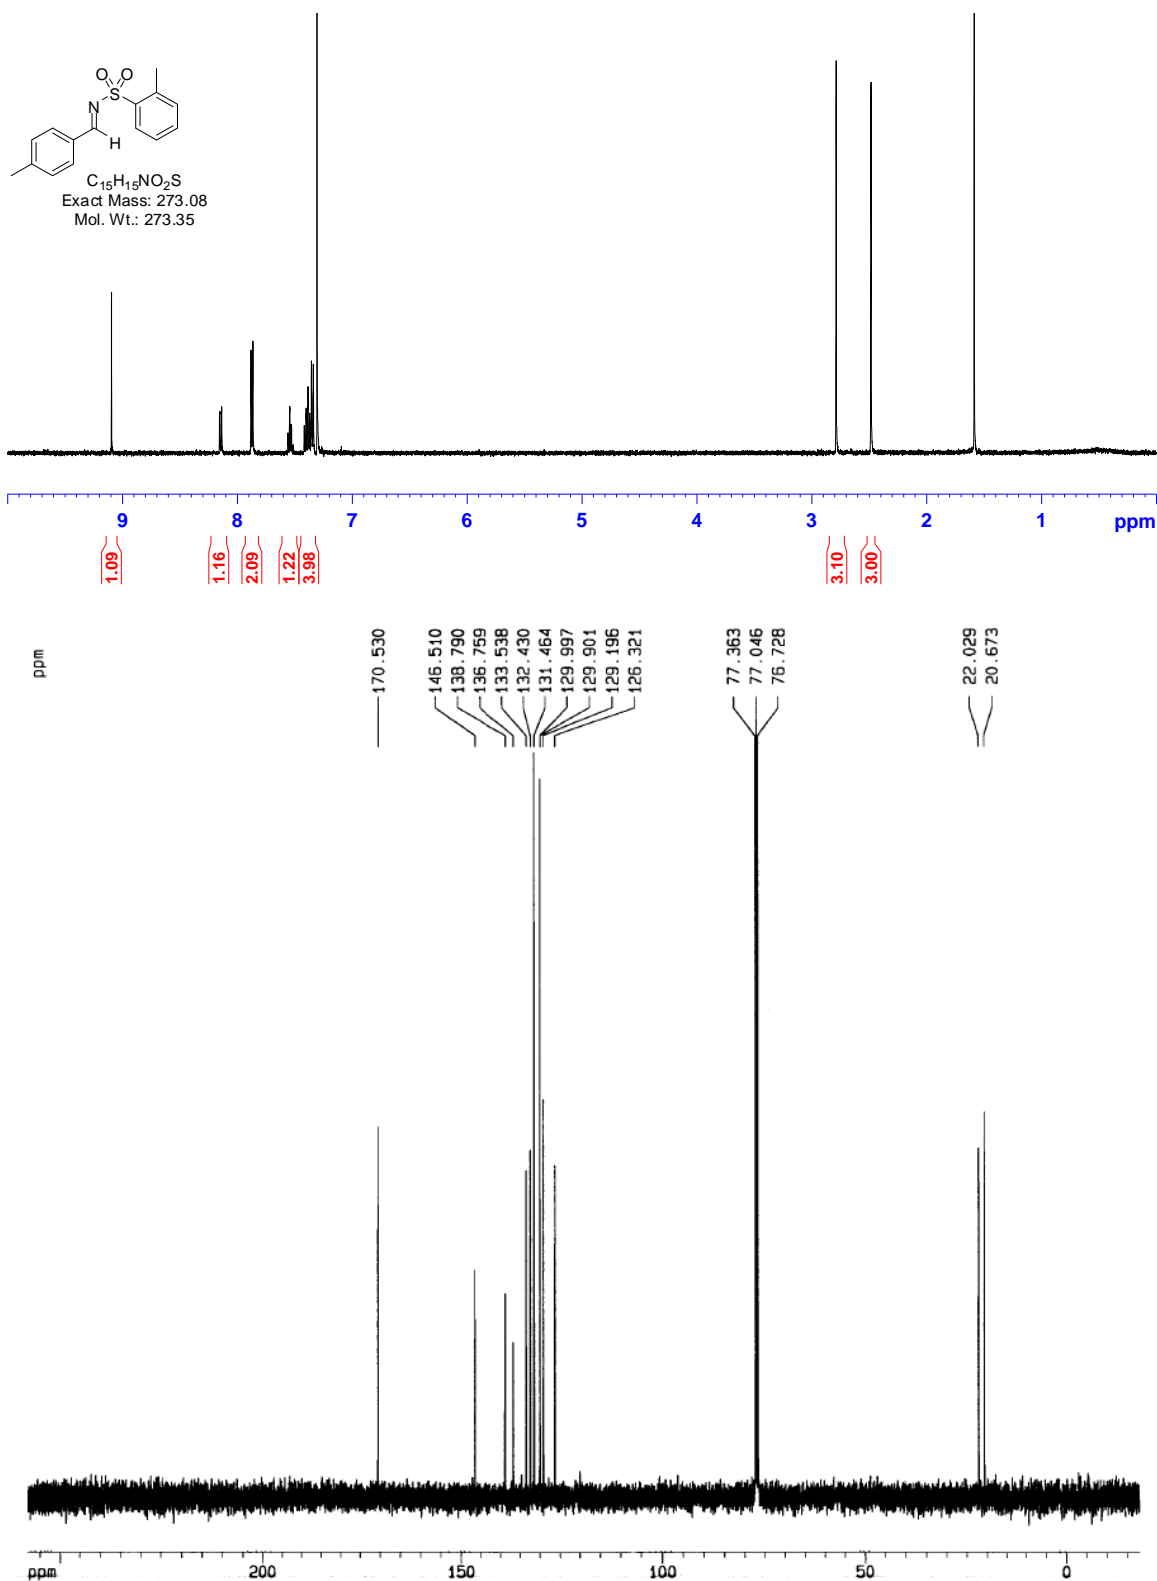

## 2-[4-Methylbenzylidene)-sulfamoyl]-benzoic acid methyl ester (C42)

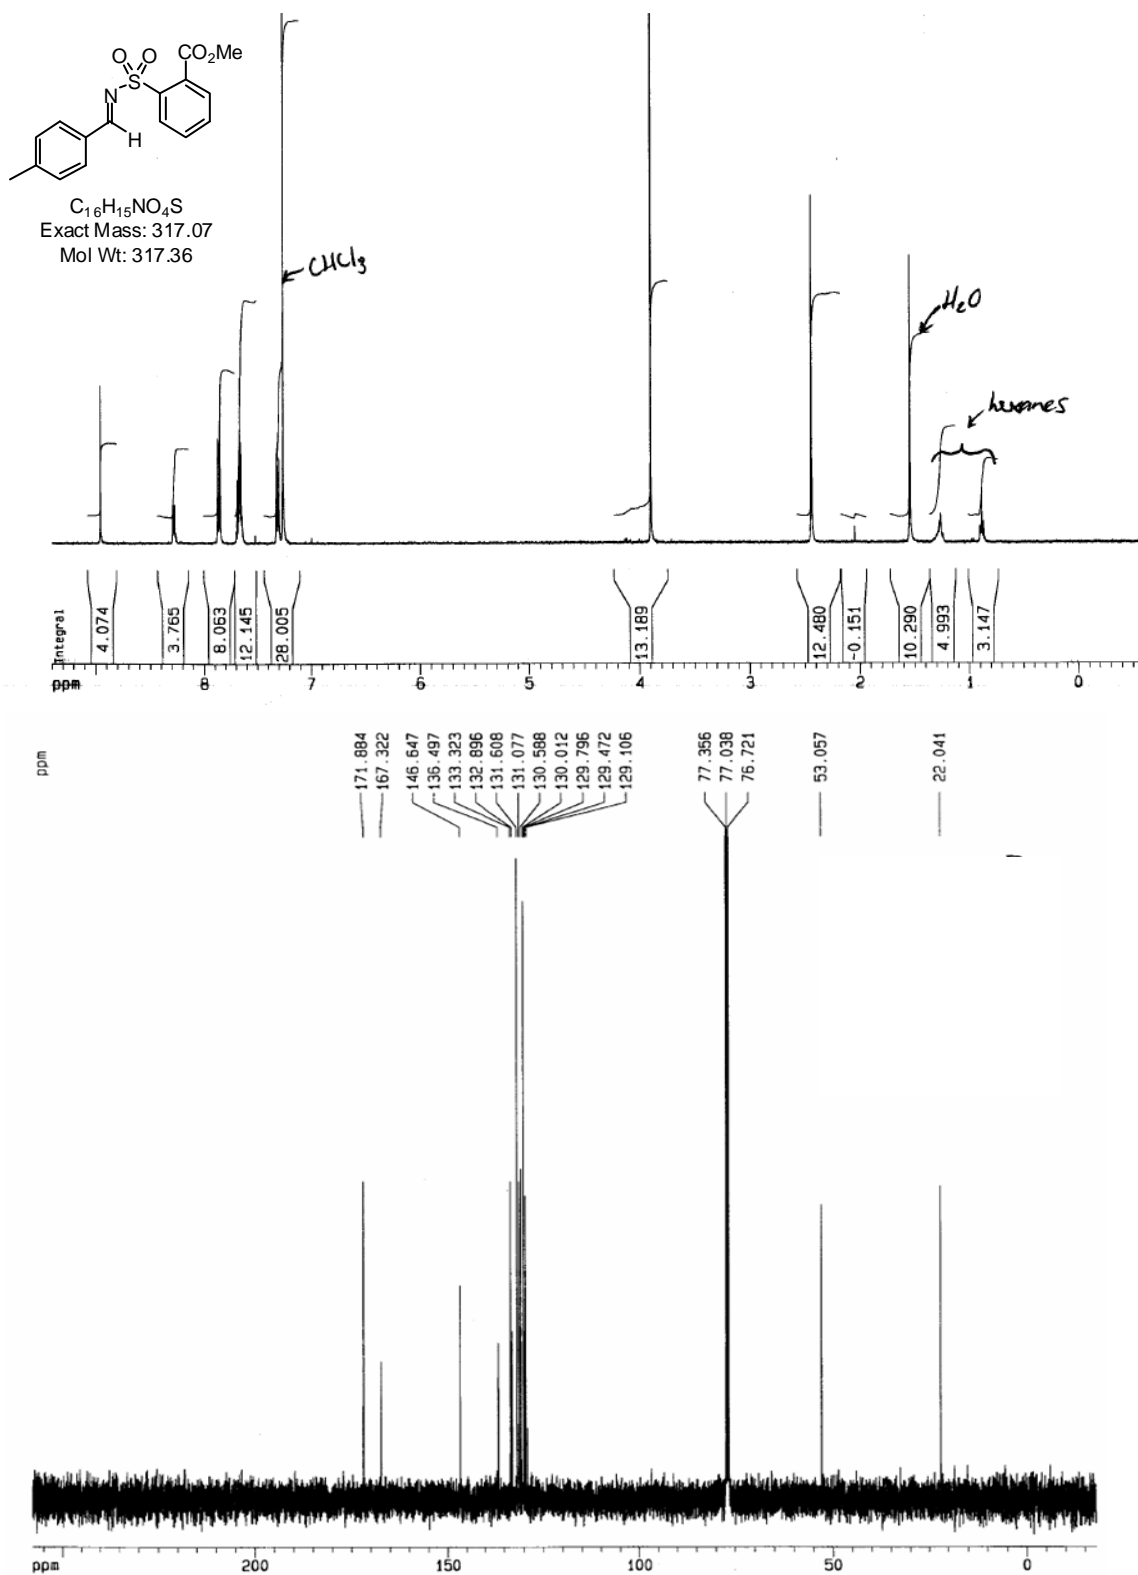

1-(4-Toluenesulfonyl)-2-(*p*-tolyl)-2,5-dihydro-1*H*-pyrrole-3-carboxylic acid (A01C02)

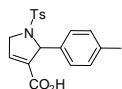

C<sub>19</sub>H<sub>19</sub>NO<sub>4</sub>S  
Exact Mass: 357.1  
Mol. Wt.: 357.42

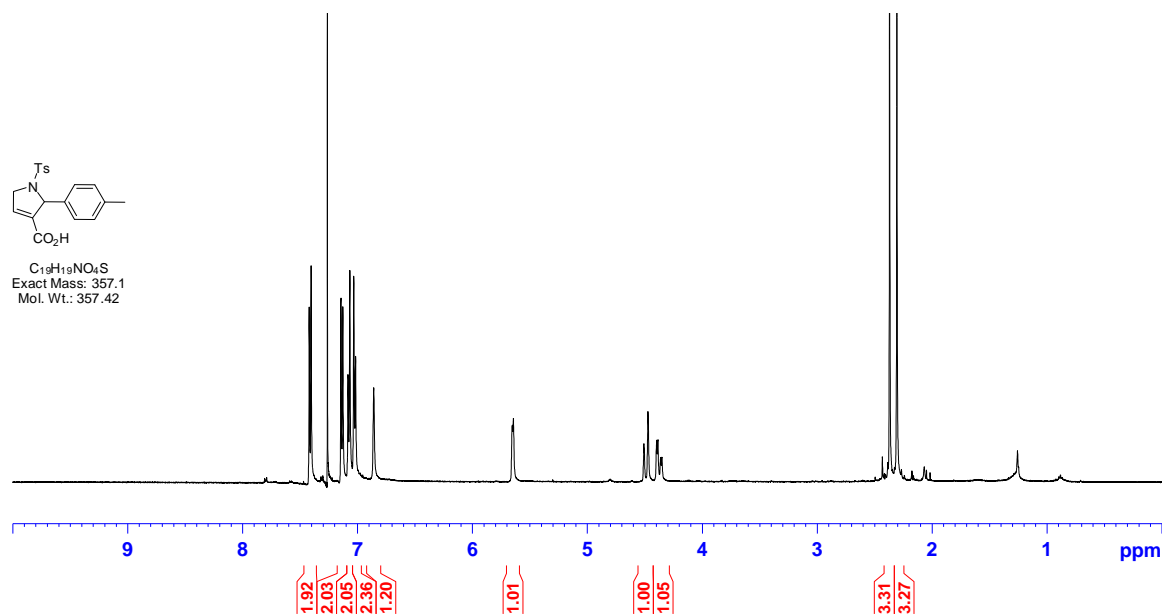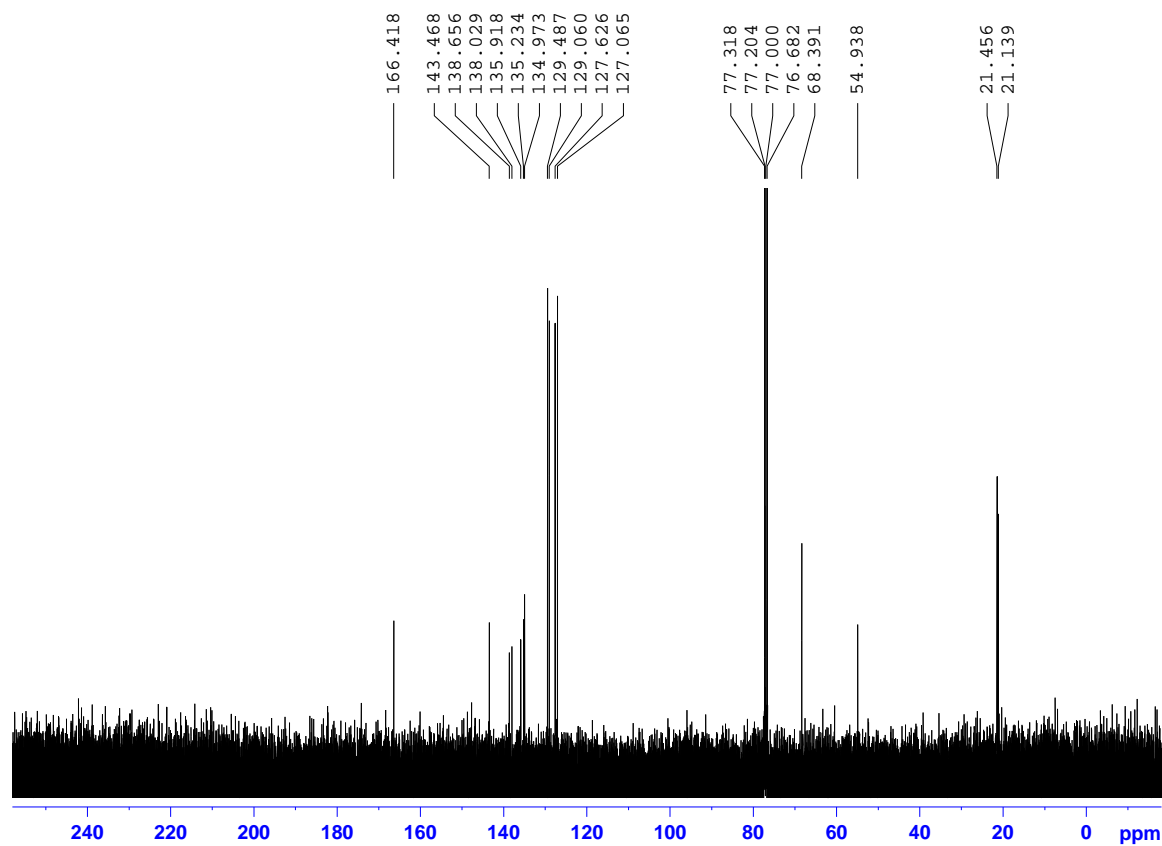

# 5-Ethyl-1-(4-toluenefonyl)-2-(*p*-tolyl)-2,5-dihydro-1-pyrrole-3-carboxylic acid (A05C02)

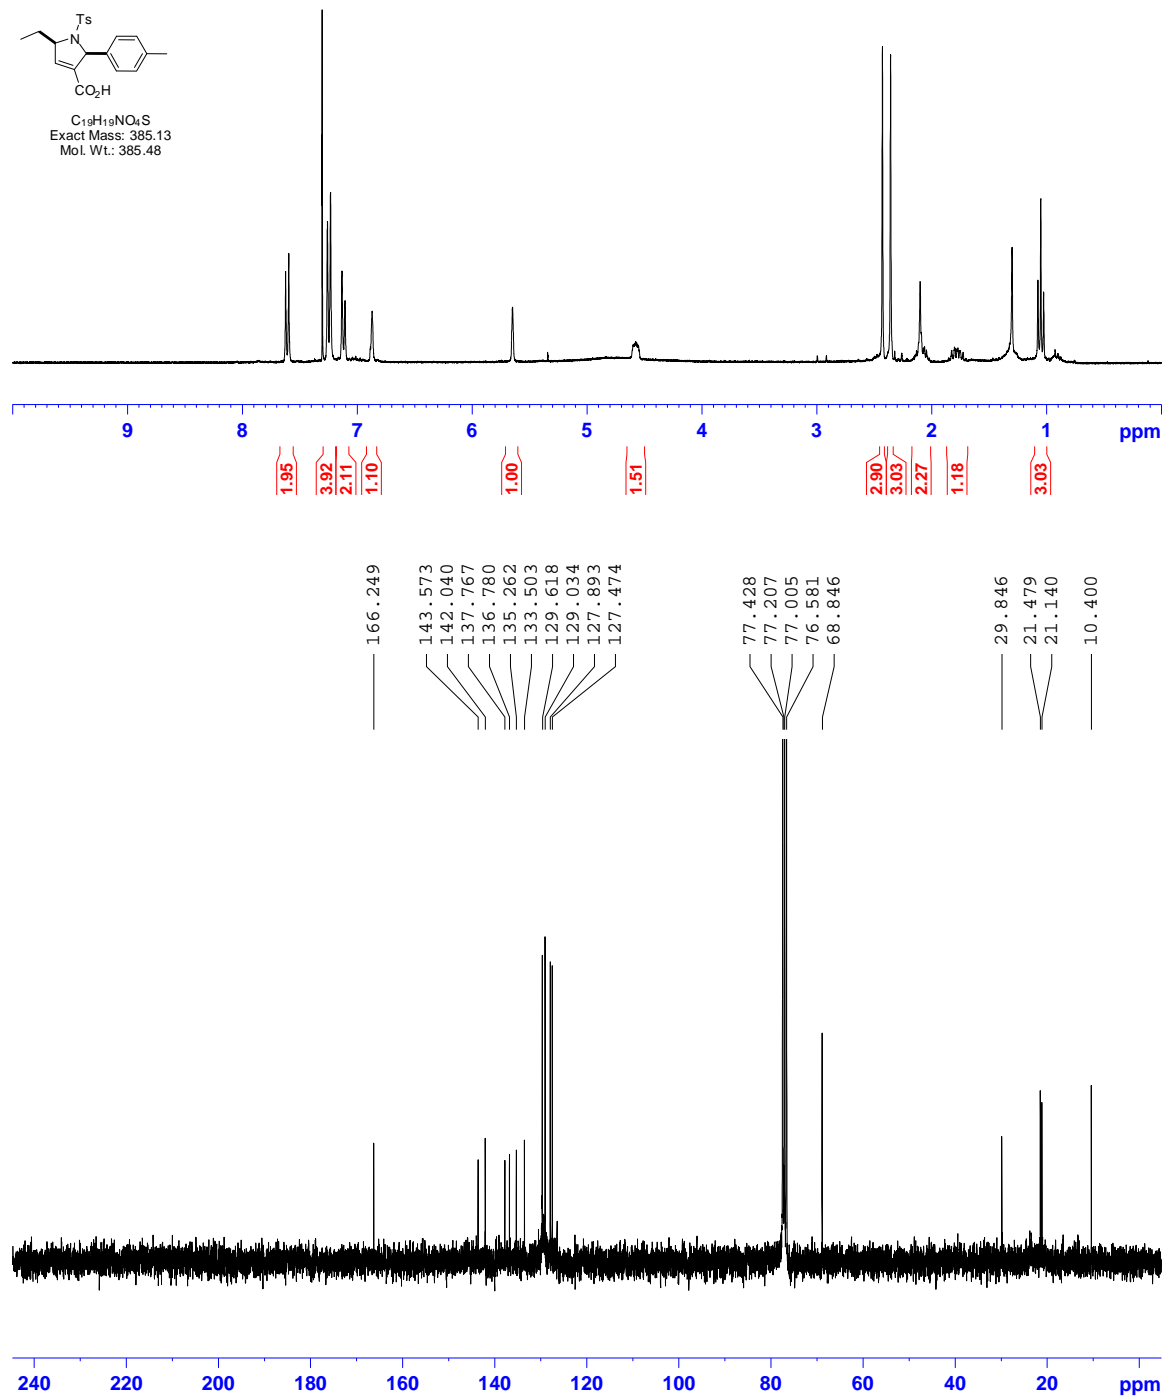



1-(4-Toluenesulfonyl)-6-(*p*-tolyl)-1,2,5,6-tetrahydropyridine-3-carboxylic acid (B01C02)

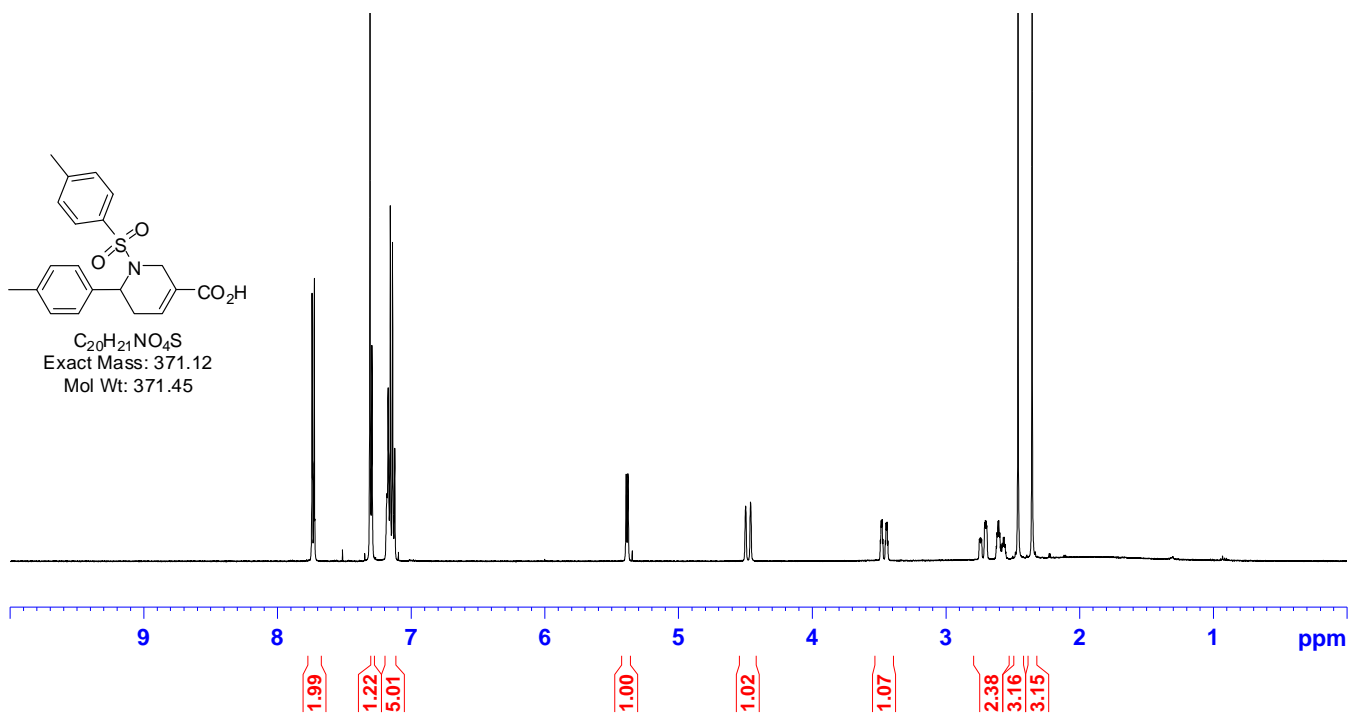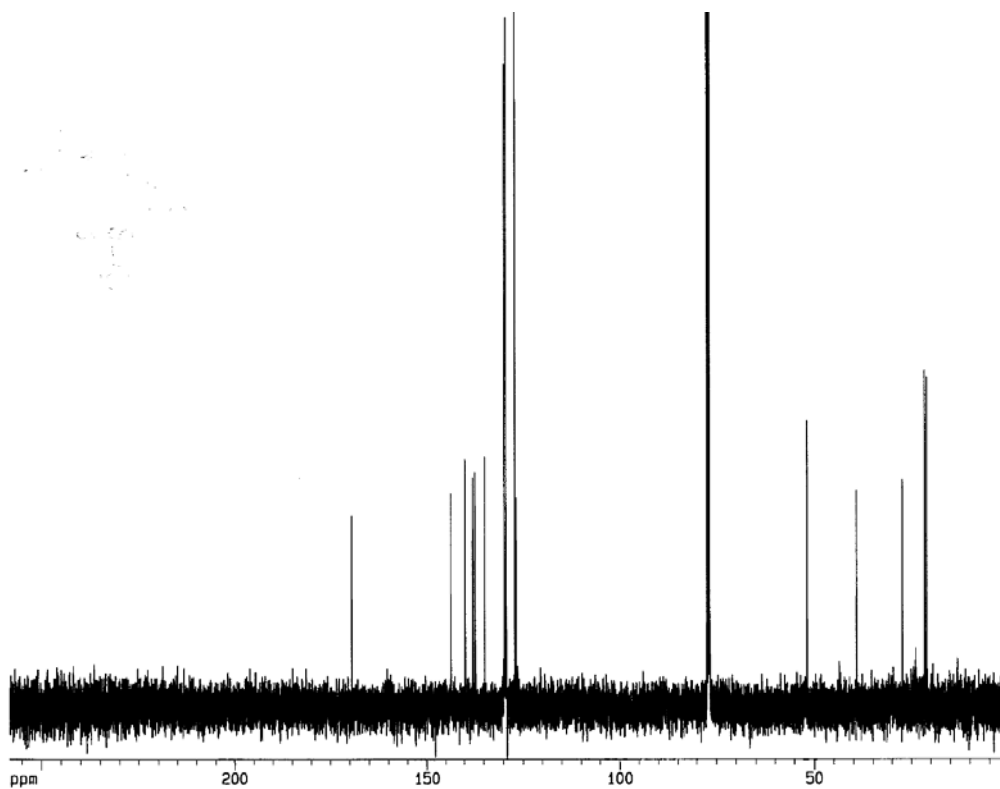

# 6-(3-Chlorophenyl)-1-(4-toluenesulfonyl)-1,2,5,6-tetrahydropyridine-3-carboxylic acid (B01C12)

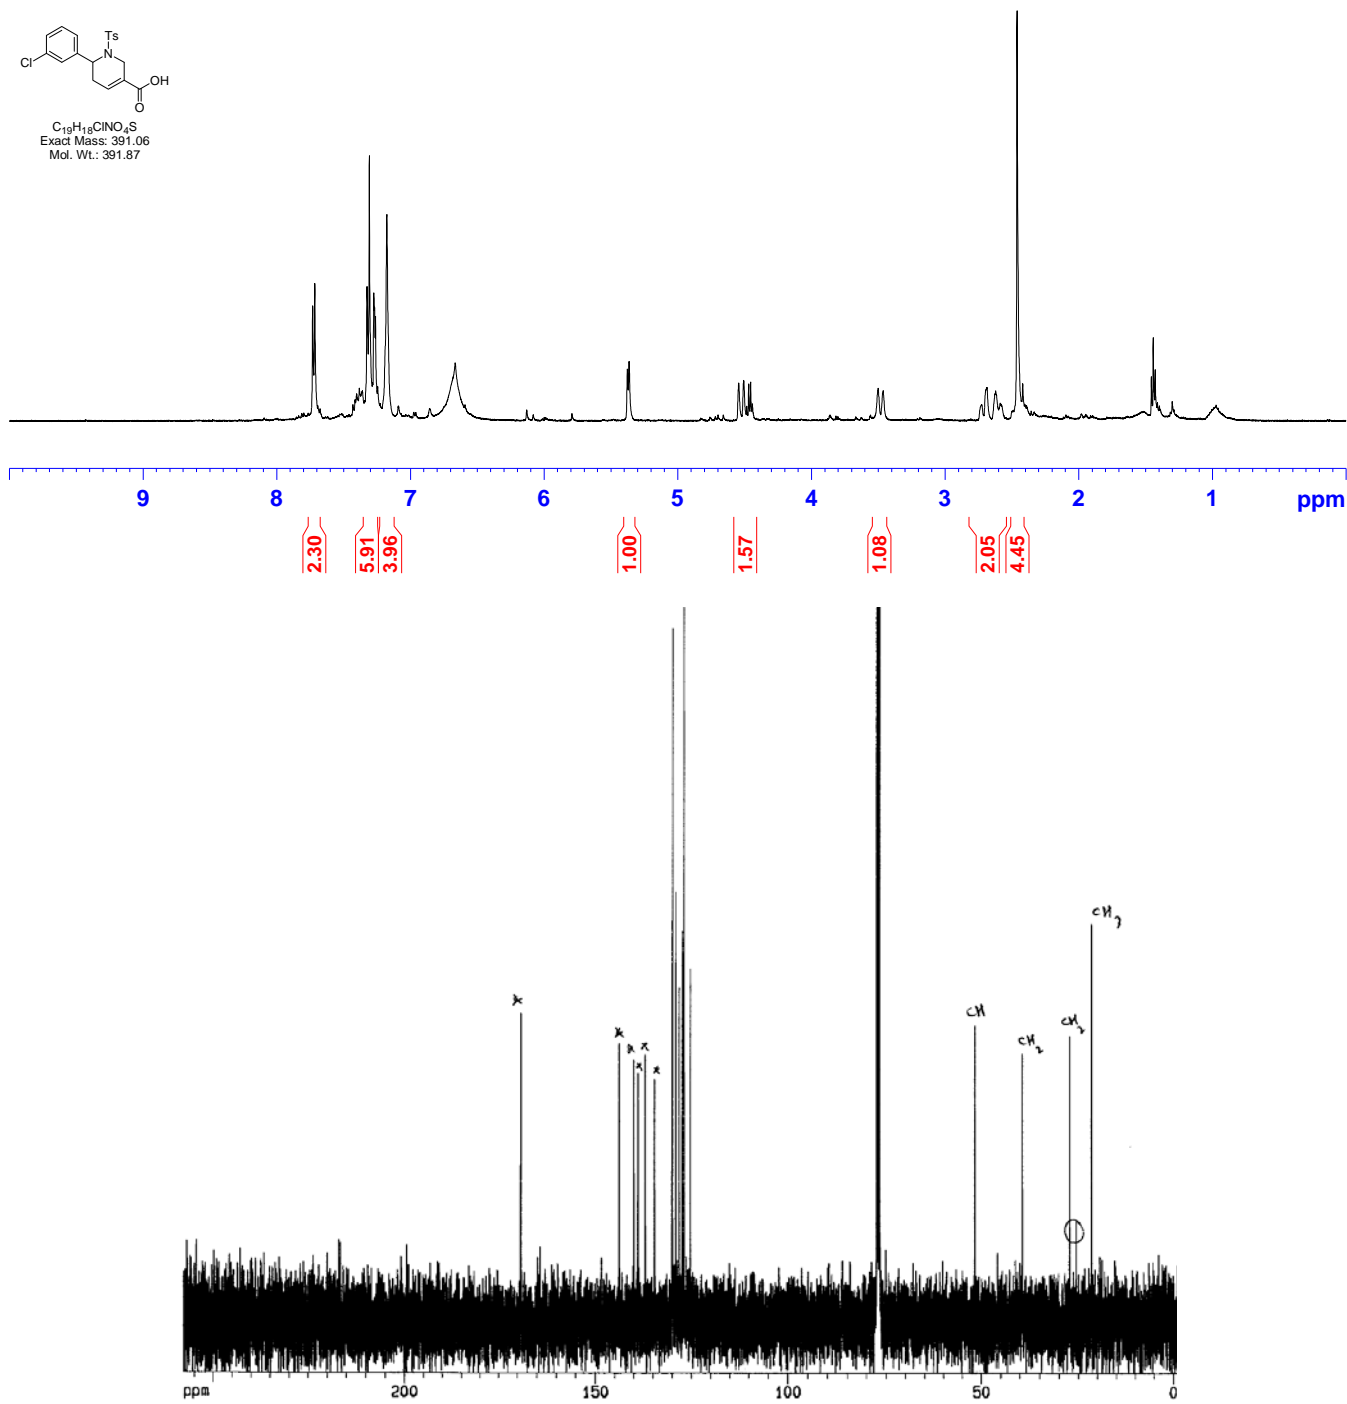

**2-Phenyl-1-(4-toluenesulfonyl)-6-(*p*-tolyl)-1,2,5,6-tetrahydropyridine-3-carboxylic acid (B02C02)**

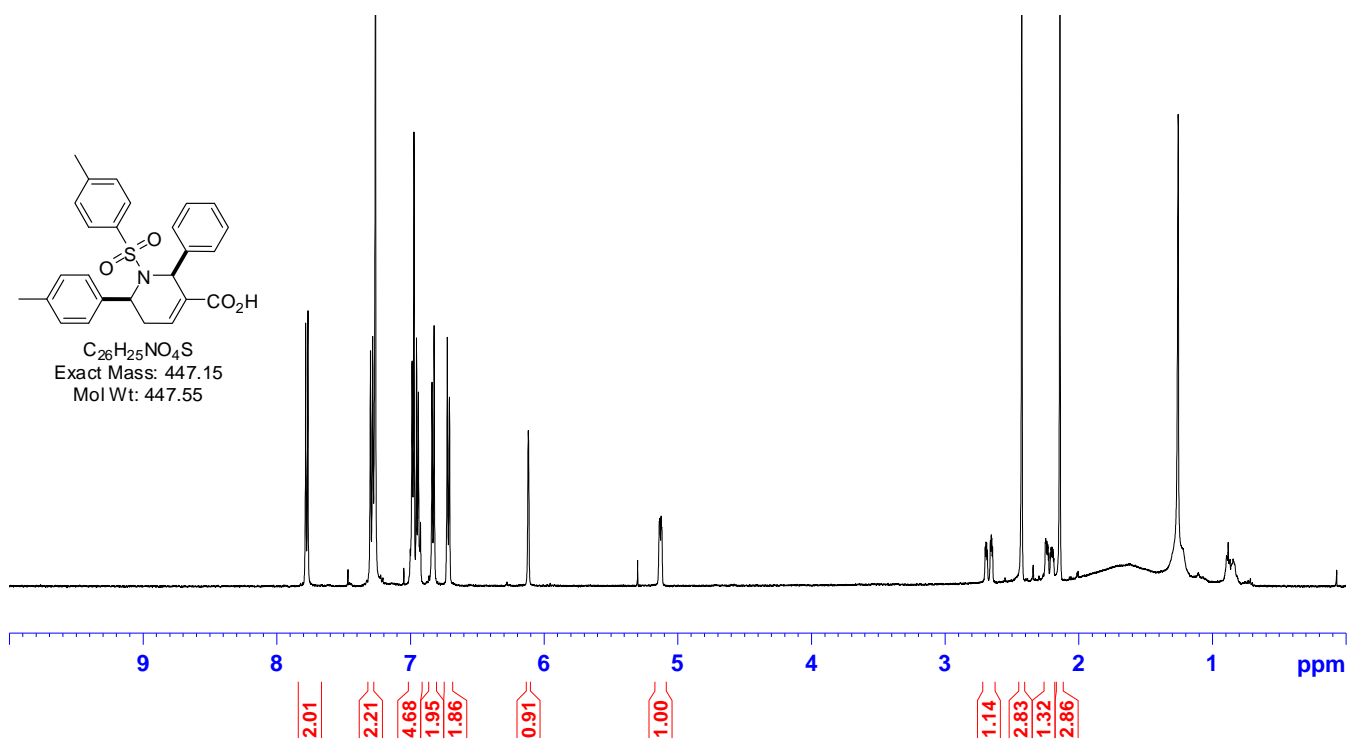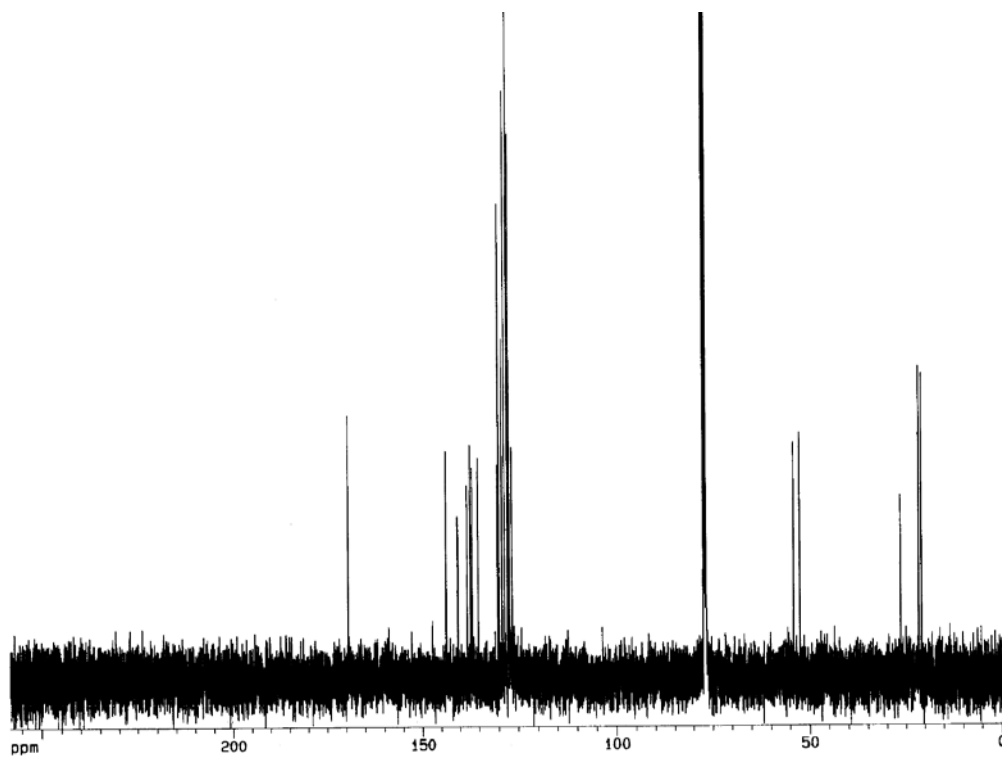

# 5-Ethyl-4-phenylsulfanyl-1-(4-toluenesulfonyl)-2-(*p*-tolyl)-pyrrolidine-3-carboxylic acid (A05C02E01)

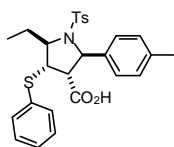

$C_{27}H_{29}NO_4S_2$   
Exact Mass: 495.15  
Mol Wt: 495.65

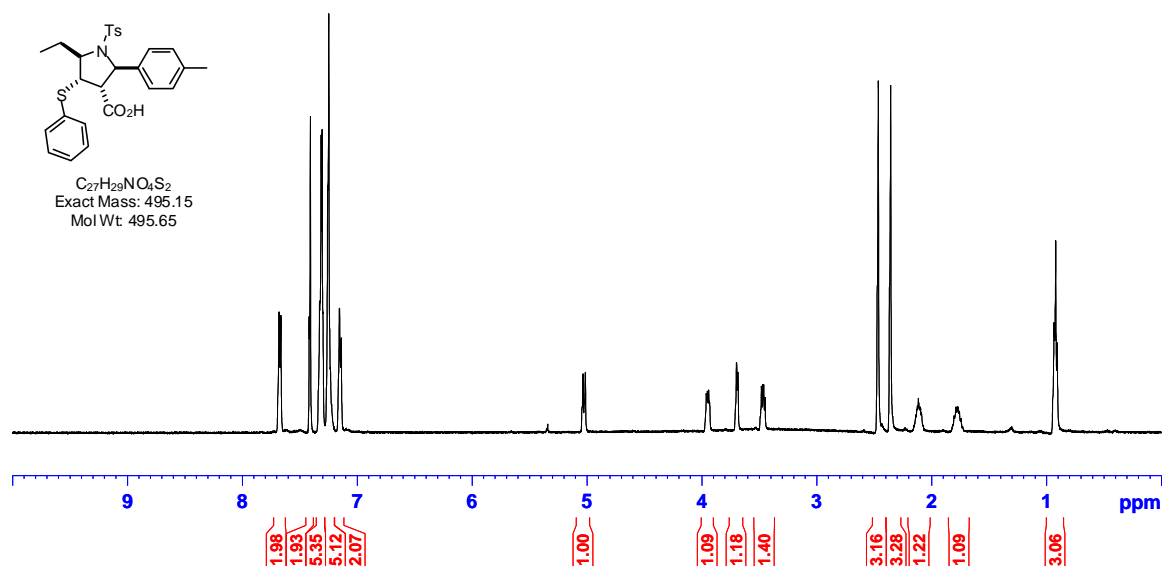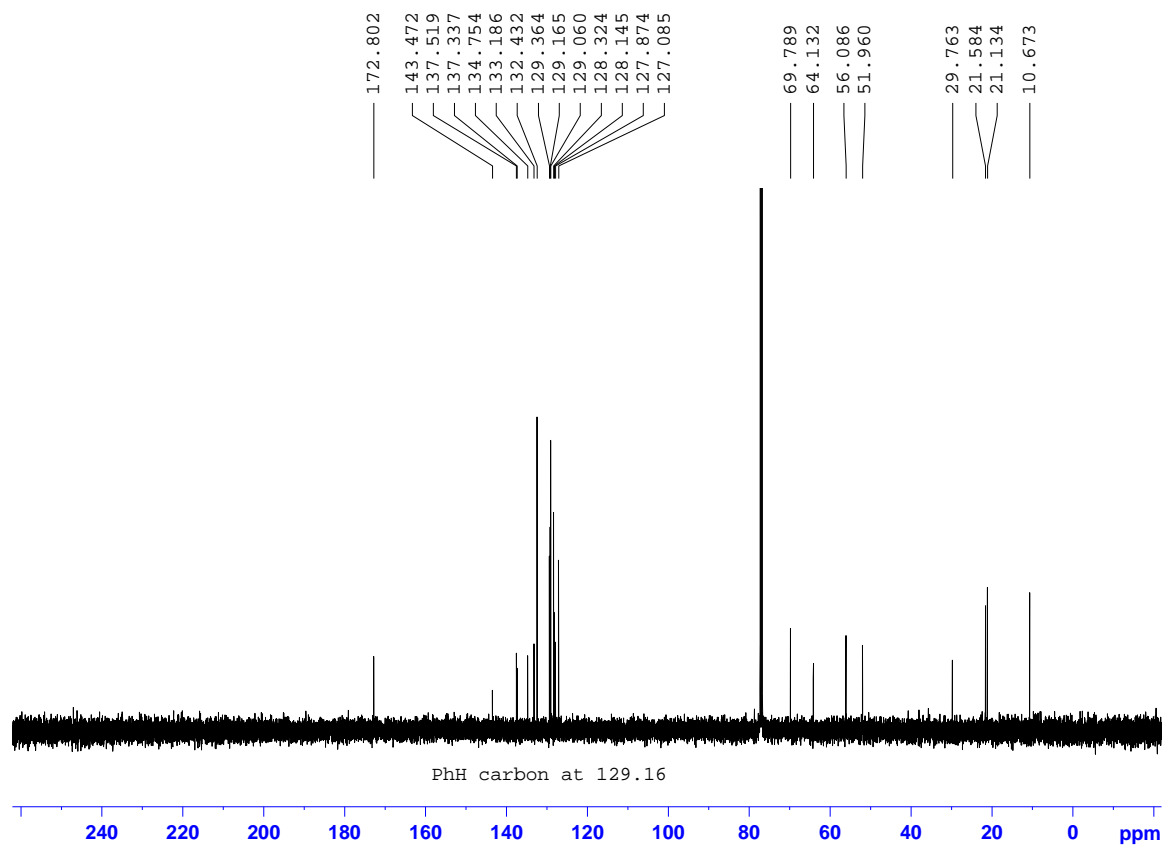

**6-Phenyl-4-phenylsulfanyl-1-(4-toluenesulfonyl)-piperidine-3-carboxylic acid (B01C01E01)**

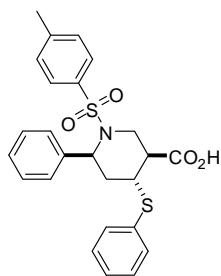

C<sub>25</sub>H<sub>25</sub>NO<sub>4</sub>S<sub>2</sub>  
Exact Mass: 467.12  
Mol Wt: 467.60

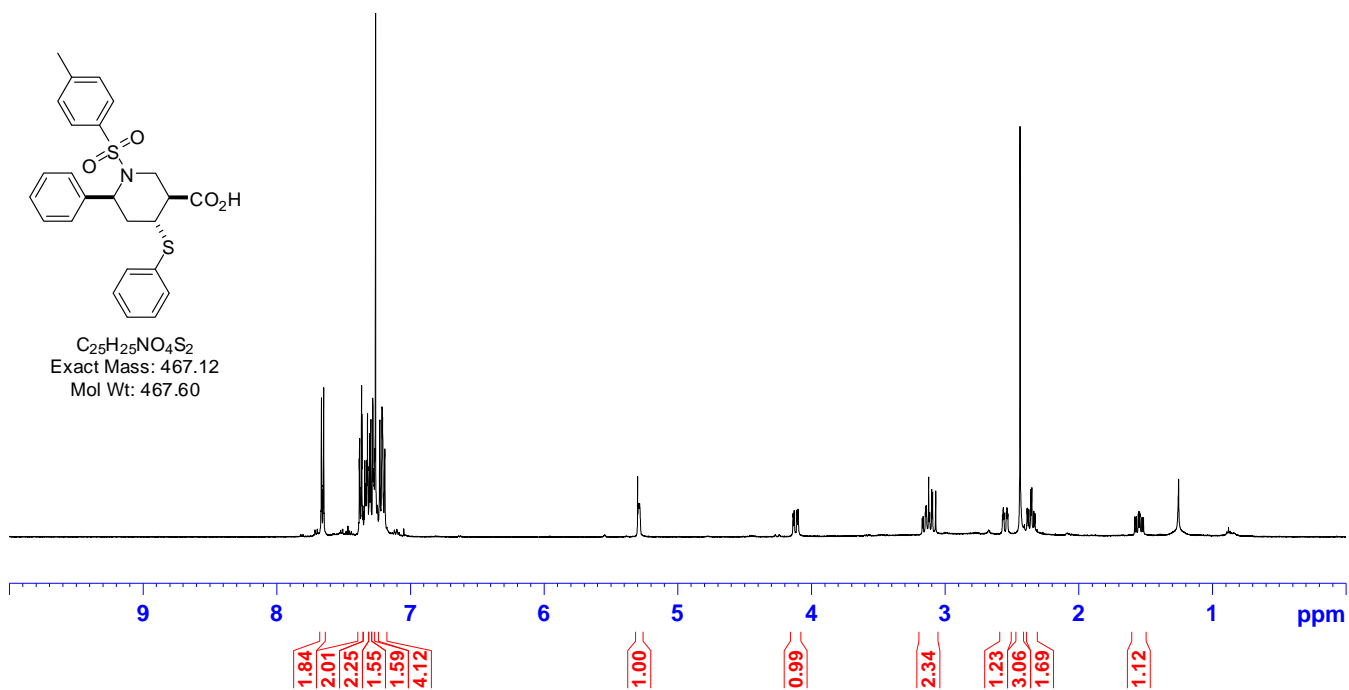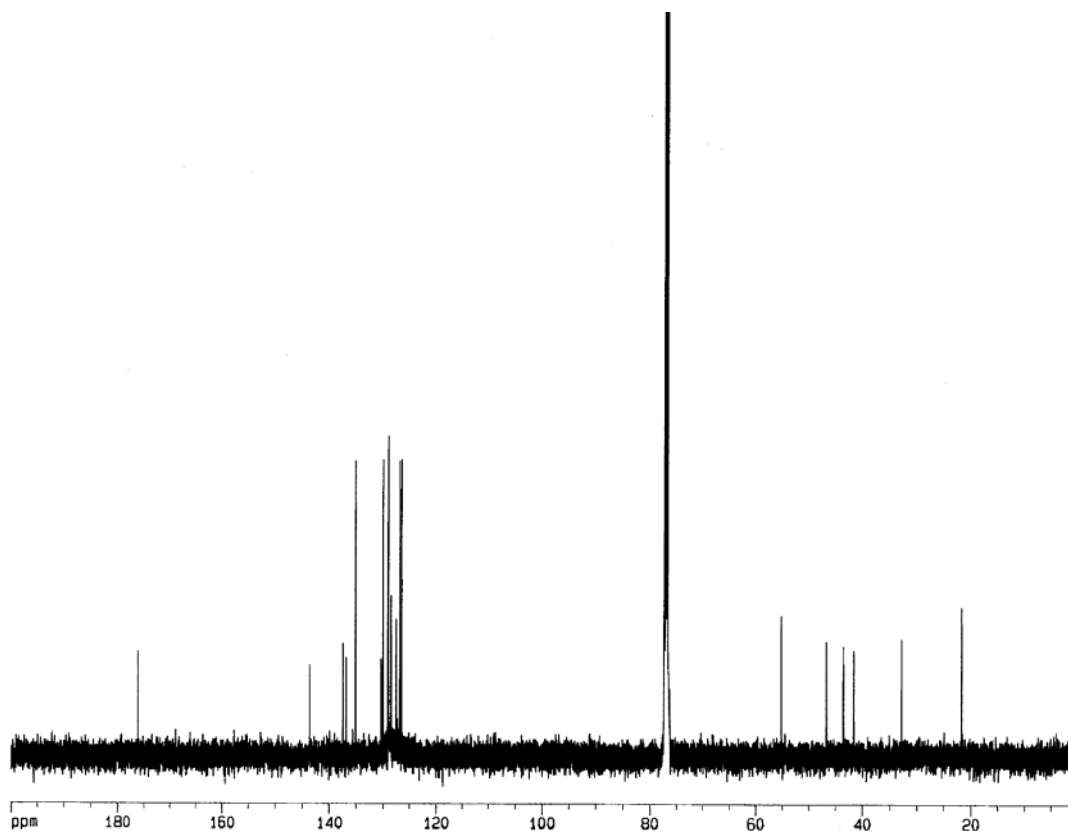

4-(4-*t*-Butylbenzylsulfanyl)-6-phenyl-1-(4-toluenesulfonyl)-piperidine-3-carboxylic acid (B01C01E07)

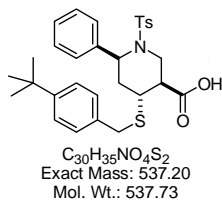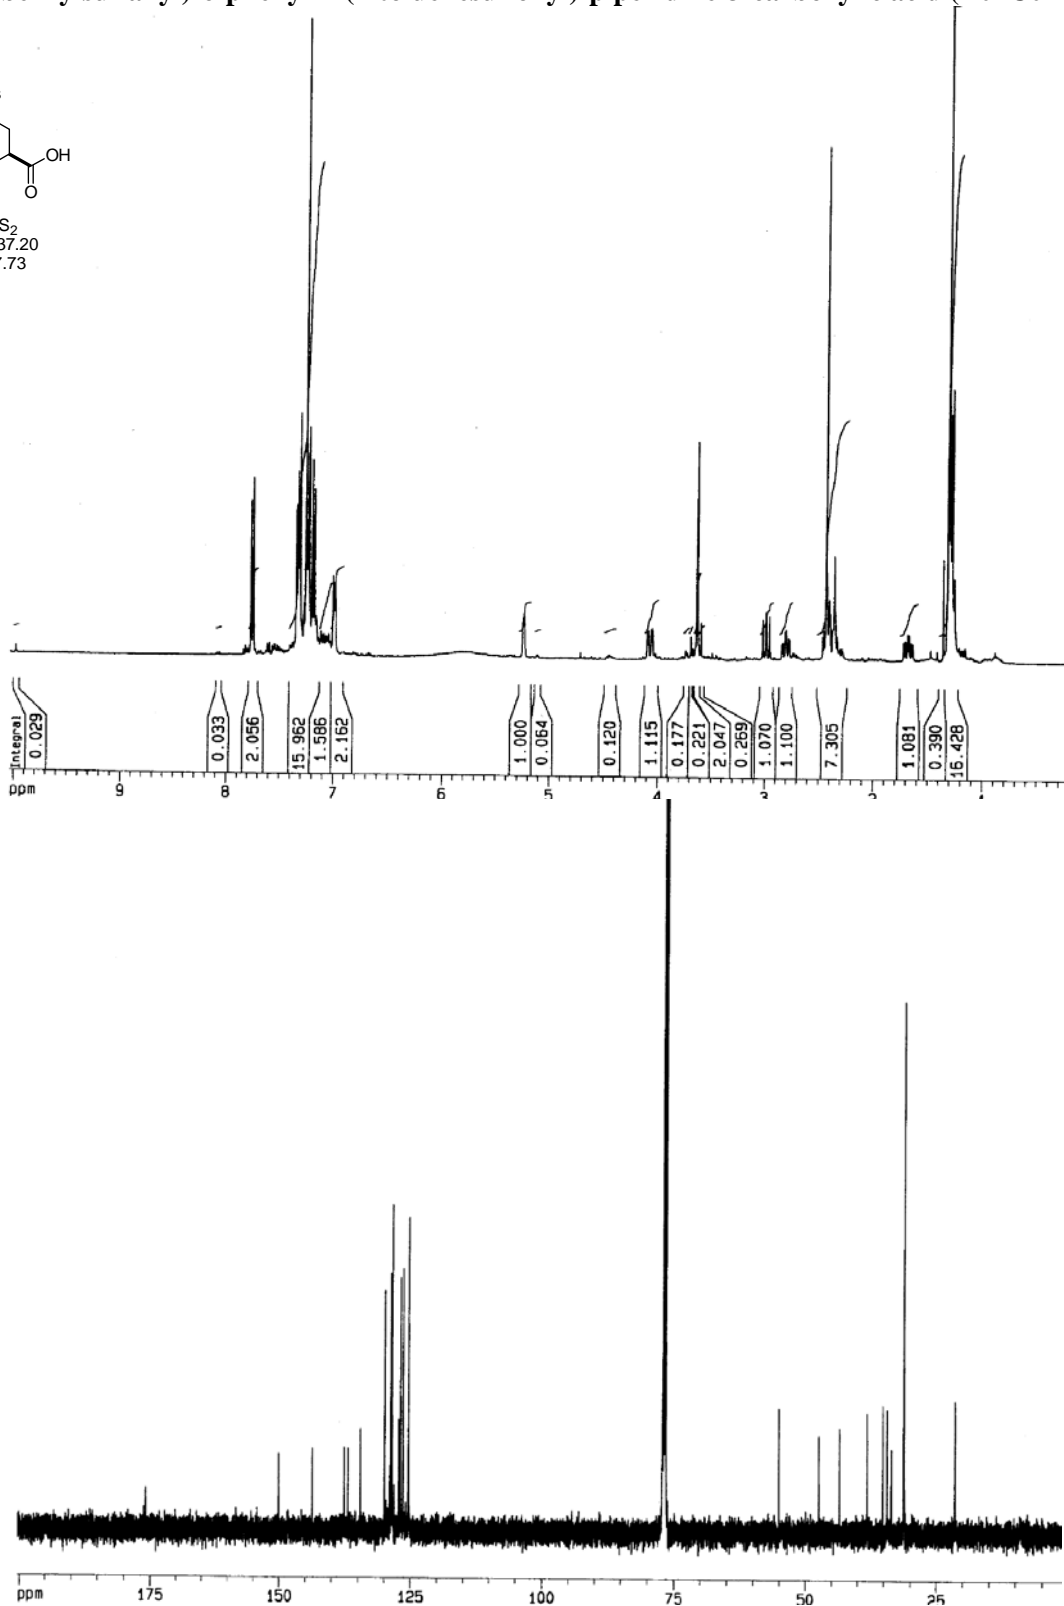

Supplement: NIHMS63737-supplement-5si20070310_06.pdf [file NIHMS63737-supplement-5si20070310_06.pdf]
