# Supplementary material
Source: PubMed Central journal article supplement (PMC2543057)

Supporting Information, Part D

**Small-Molecule Inhibitors of Protein Geranylgeranyltransferase Type I**

Sabrina Castellano, Hannah D. G. Fiji, Sape S. Kinderman, Masaru Watanabe,<sup>1</sup> Pablo de Leon, Fuyuhiko Tamanoi,<sup>1</sup>  
Ohyun Kwon\*

*Department of Chemistry and Biochemistry, Department of Microbiology, Immunology and Molecular Genetics,  
Jonsson Comprehensive Cancer Center and Molecular Biology Institute, University of California, Los Angeles,  
607 Charles E. Young Drive East, Los Angeles, CA 90095-1569*  
[ohyun@chem.ucla.edu](mailto:ohyun@chem.ucla.edu)

**Contents**

|                            |      |
|----------------------------|------|
| Spectral Data for Table 6  | S222 |
| Spectral Data for Table 7  | S266 |
| Spectral Data for Table 8  | S277 |
| Spectral Data for Table 12 | S319 |
| Spectral Data for Table 13 | S350 |

---

<sup>1</sup> Department of Microbiology, Immunology and Molecular Genetics

Spectral Data for Table 6

6-Phenyl-1-(4-toluenesulfonyl)-1,2,5,6-tetrahydropyridine-3-carboxylic acid (B01C01)

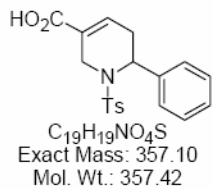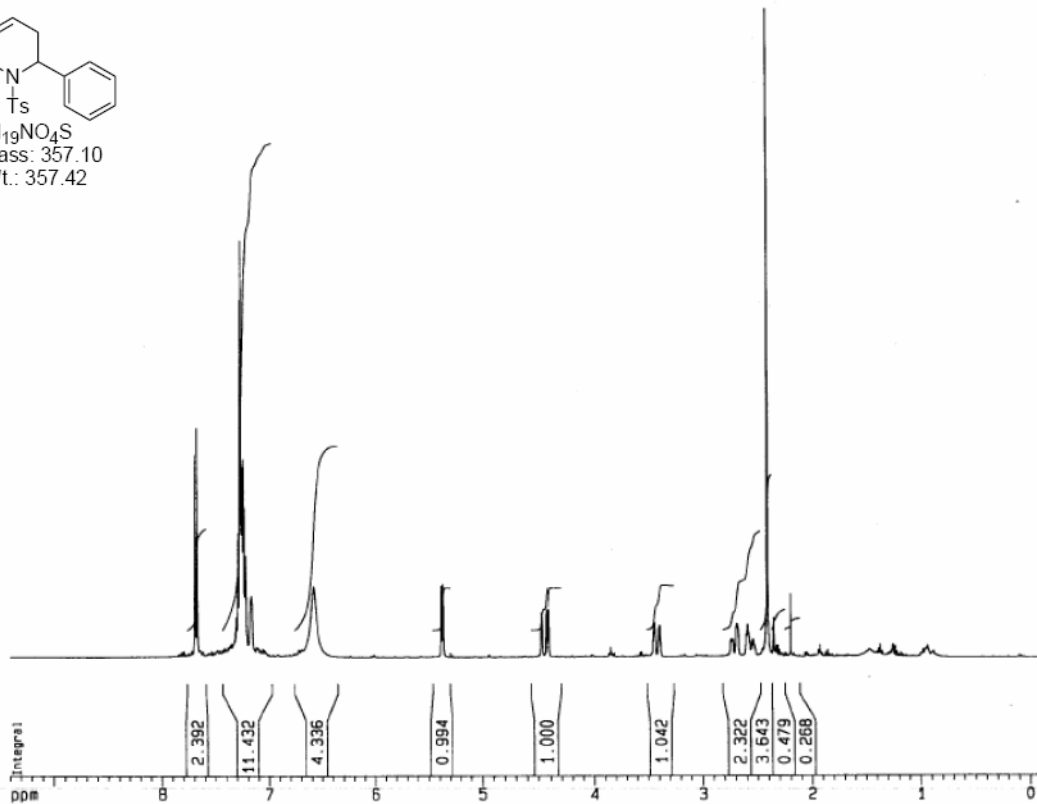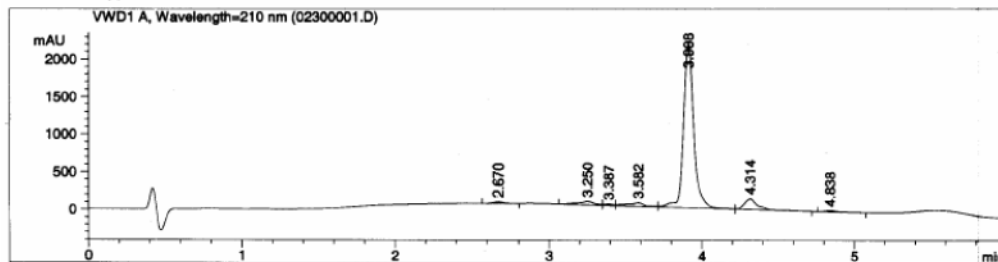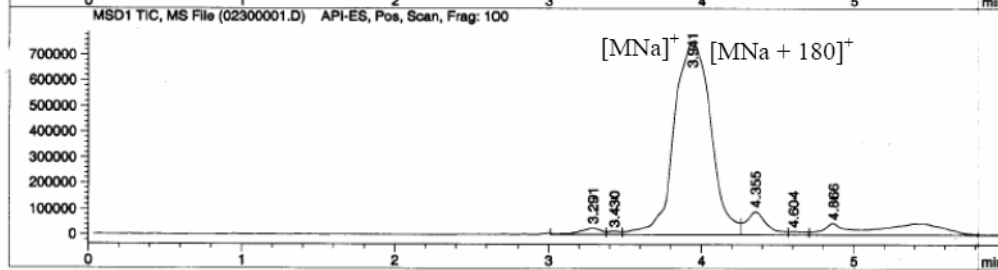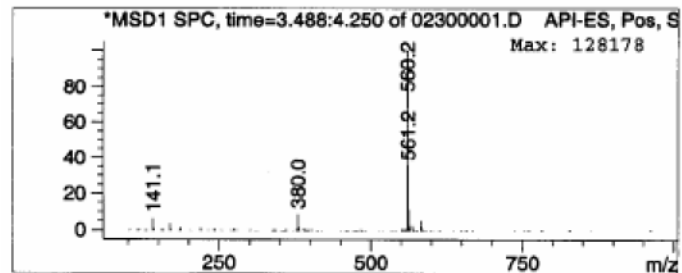

# 1-(4-Toluenesulfonyl)-6-(*p*-tolyl)-1,2,5,6-tetrahydropyridine-3-carboxylic acid (B01C02)

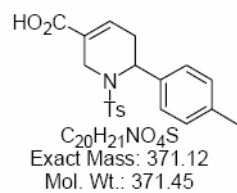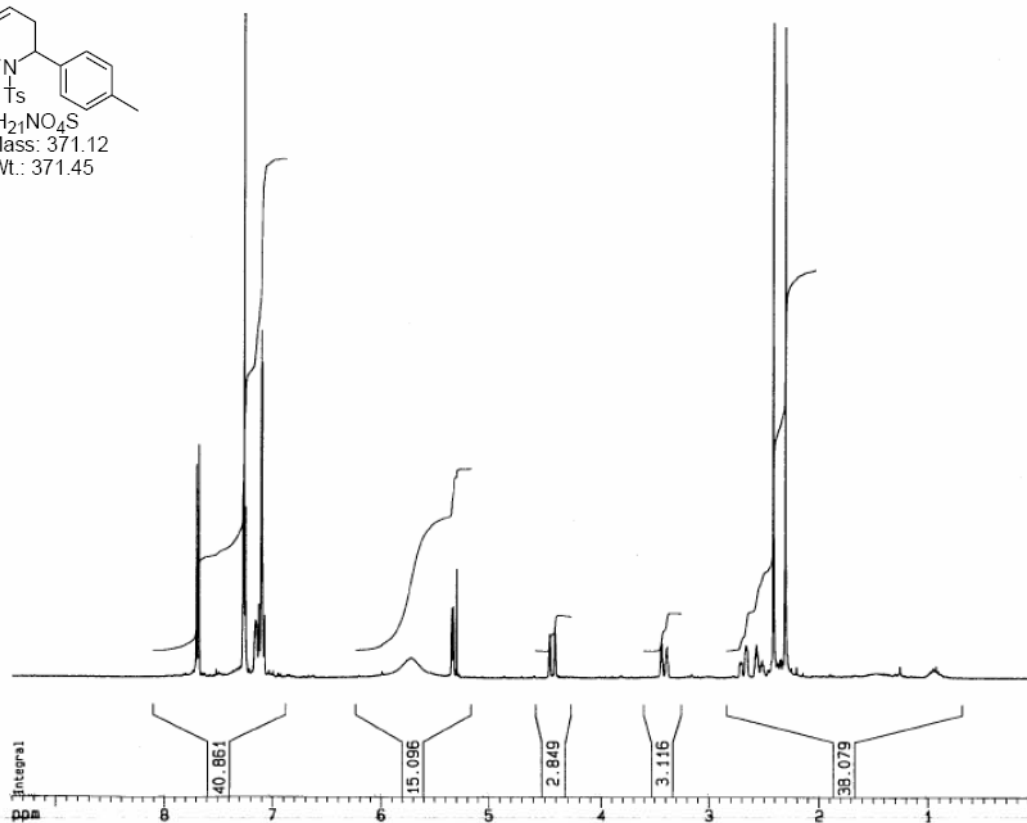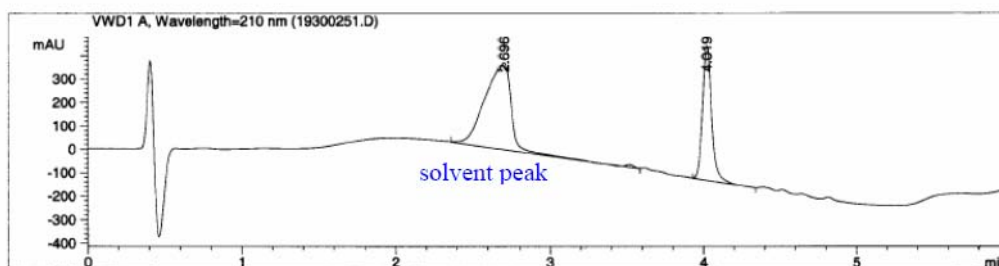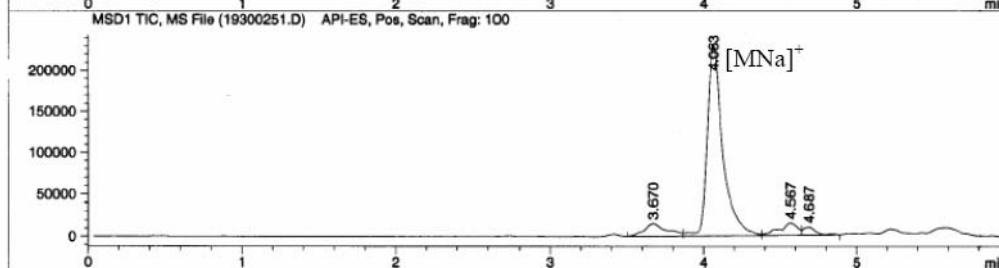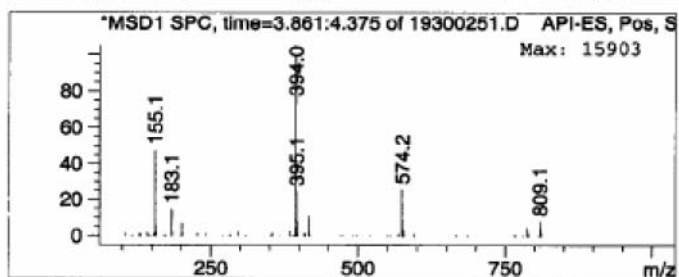

6-(4-Ethylphenyl)-1-(4-toluenesulfonyl)-1,2,5,6-tetrahydropyridine-3-carboxylic acid (B01C03)

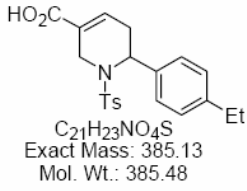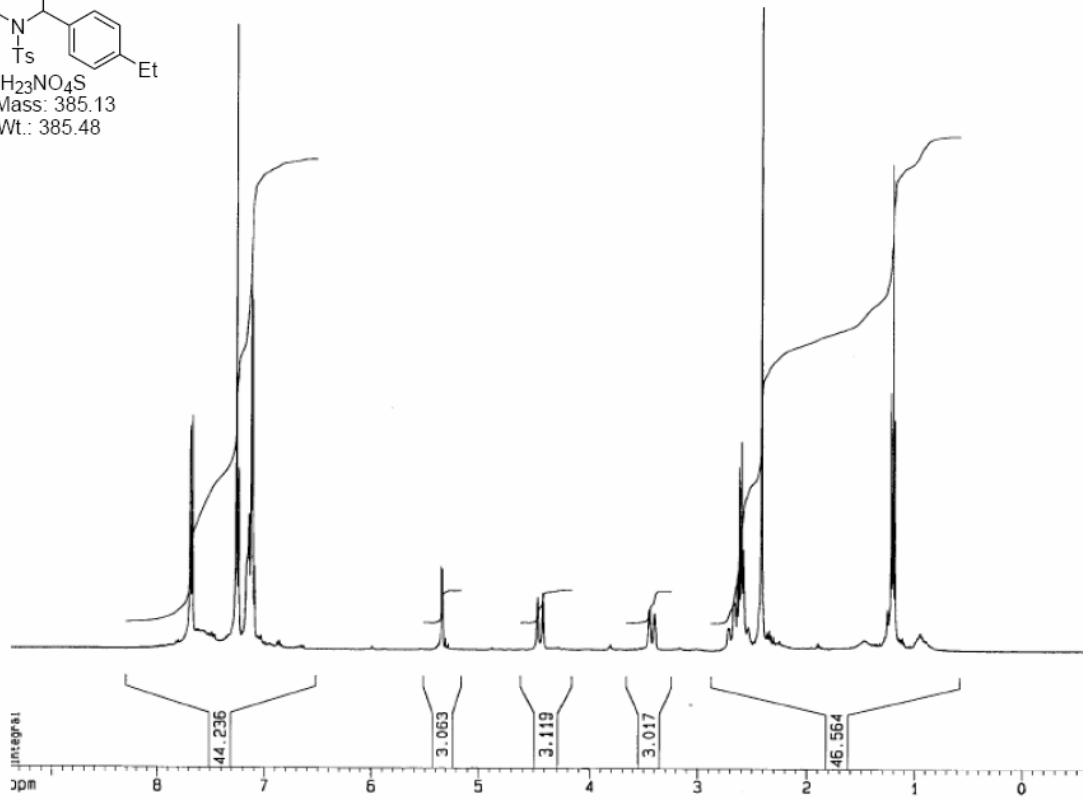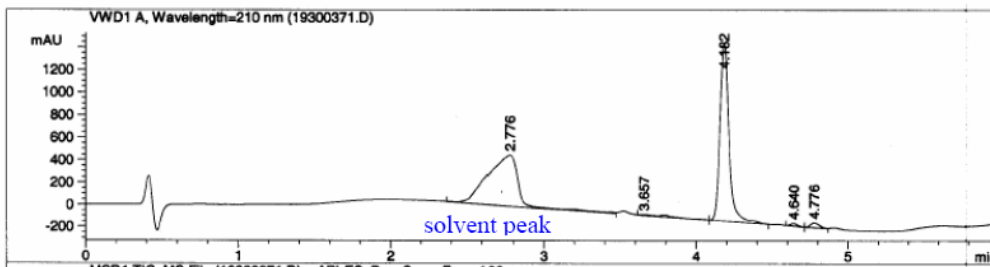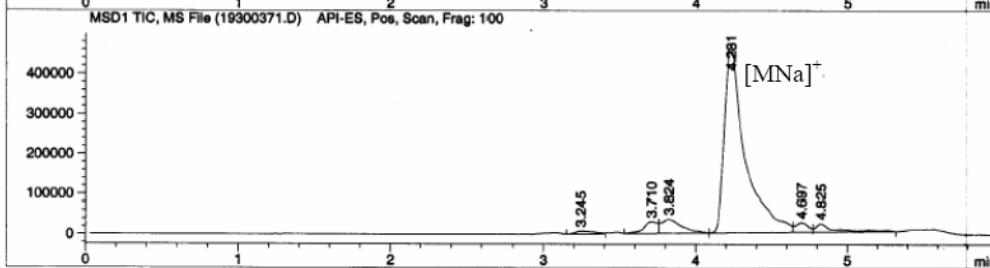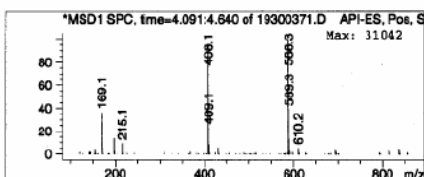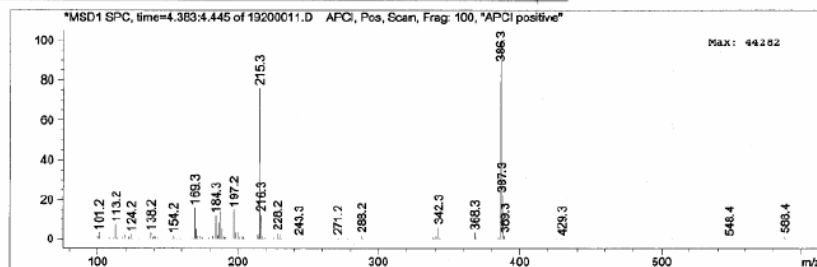



6-(4-Methoxyphenyl)-1-(4-toluenesulfonyl)-1,2,5,6-tetrahydropyridine-3-carboxylic acid (B01C04)

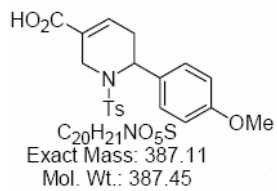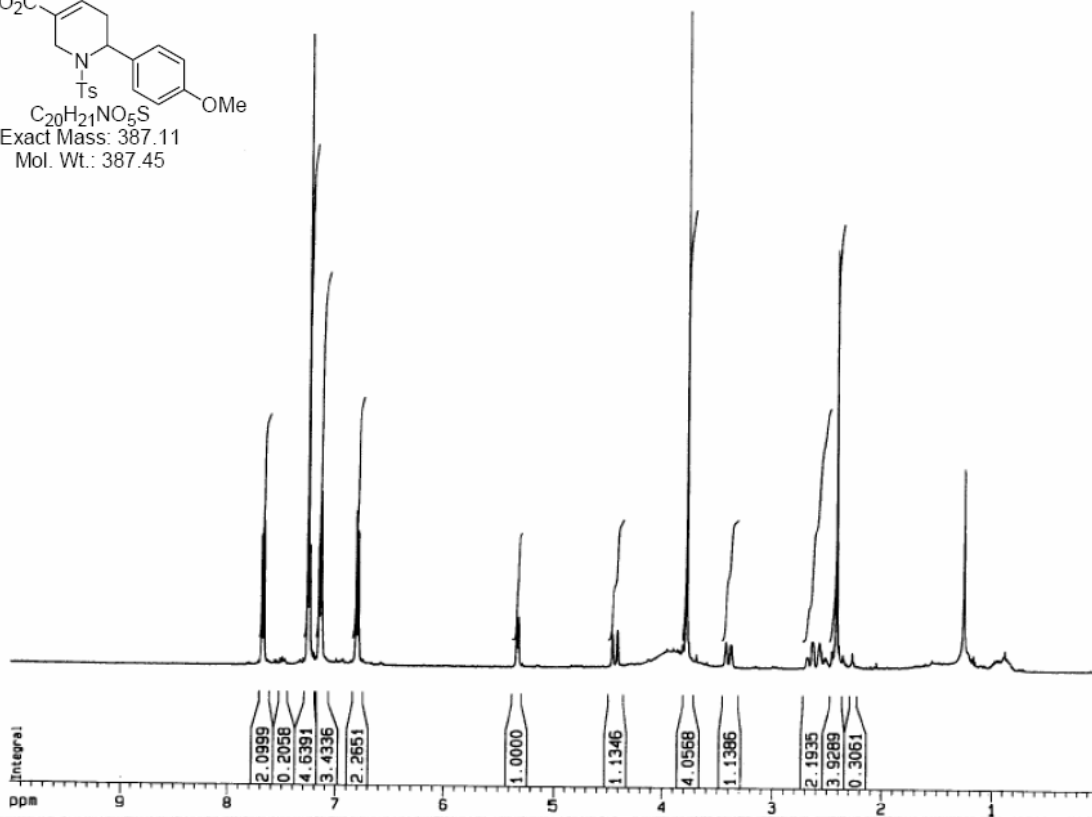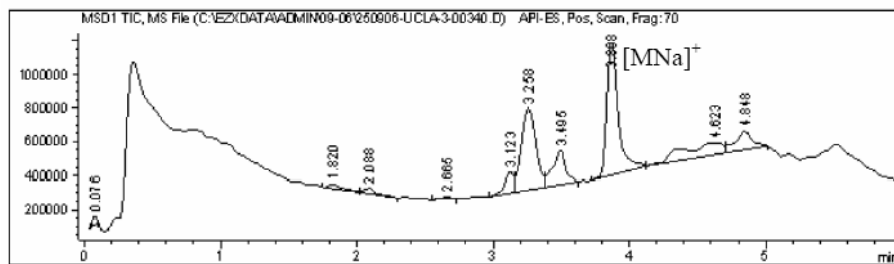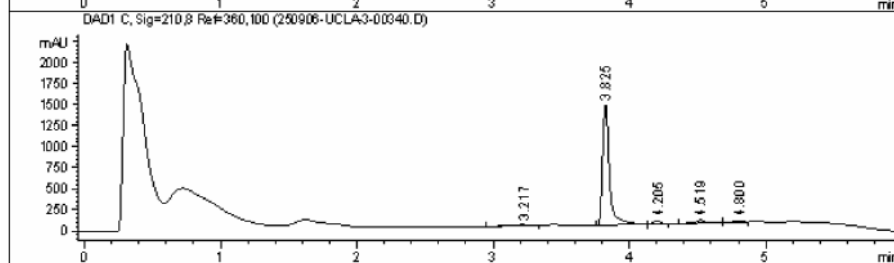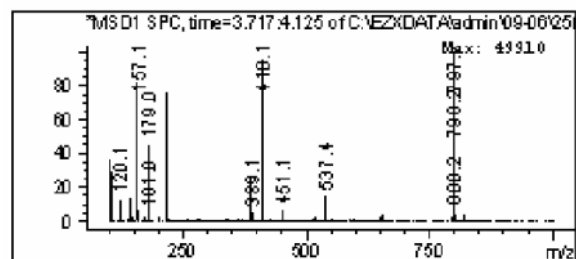

6-(4-Ethoxyphenyl)-1-(4-toluenesulfonyl)-1,2,5,6-tetrahydropyridine-3-carboxylic acid (B01C05)

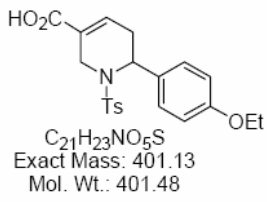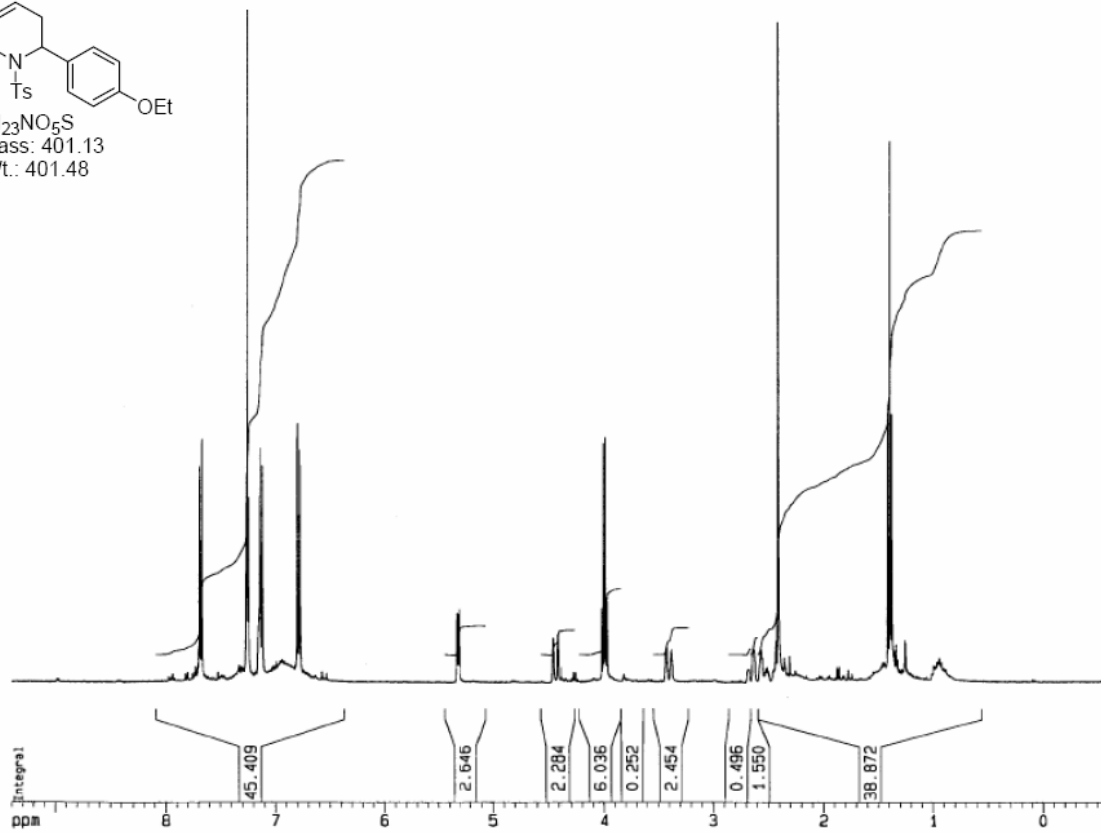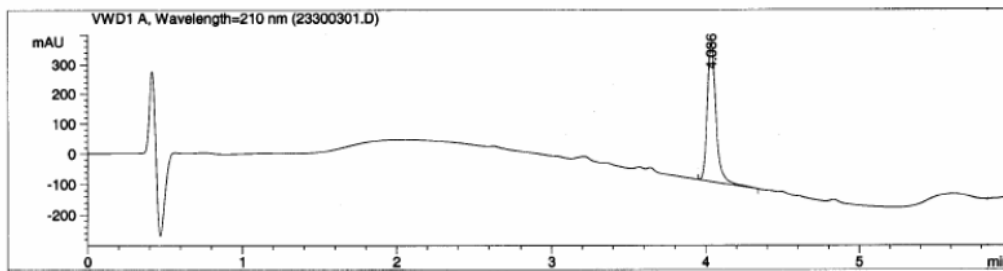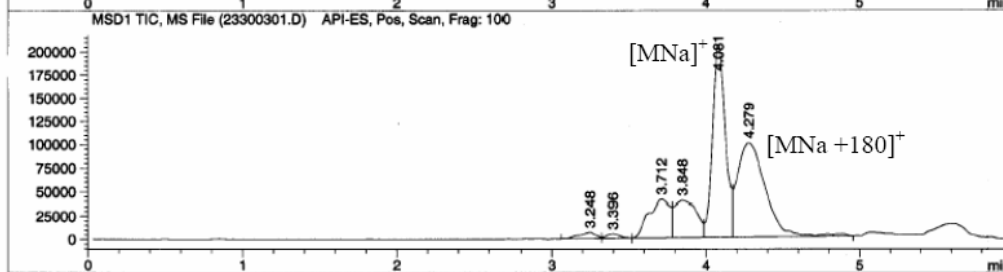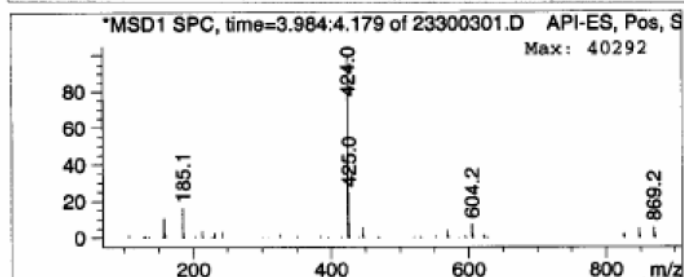

6-(Benzo[1,3]dioxol-5-yl)-1-(4-toluenesulfonyl)-1,2,5,6-tetrahydropyridine-3-carboxylic acid (B01C06)

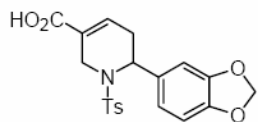

C<sub>20</sub>H<sub>19</sub>NO<sub>6</sub>S  
 Exact Mass: 401.09  
 Mol. Wt.: 401.43

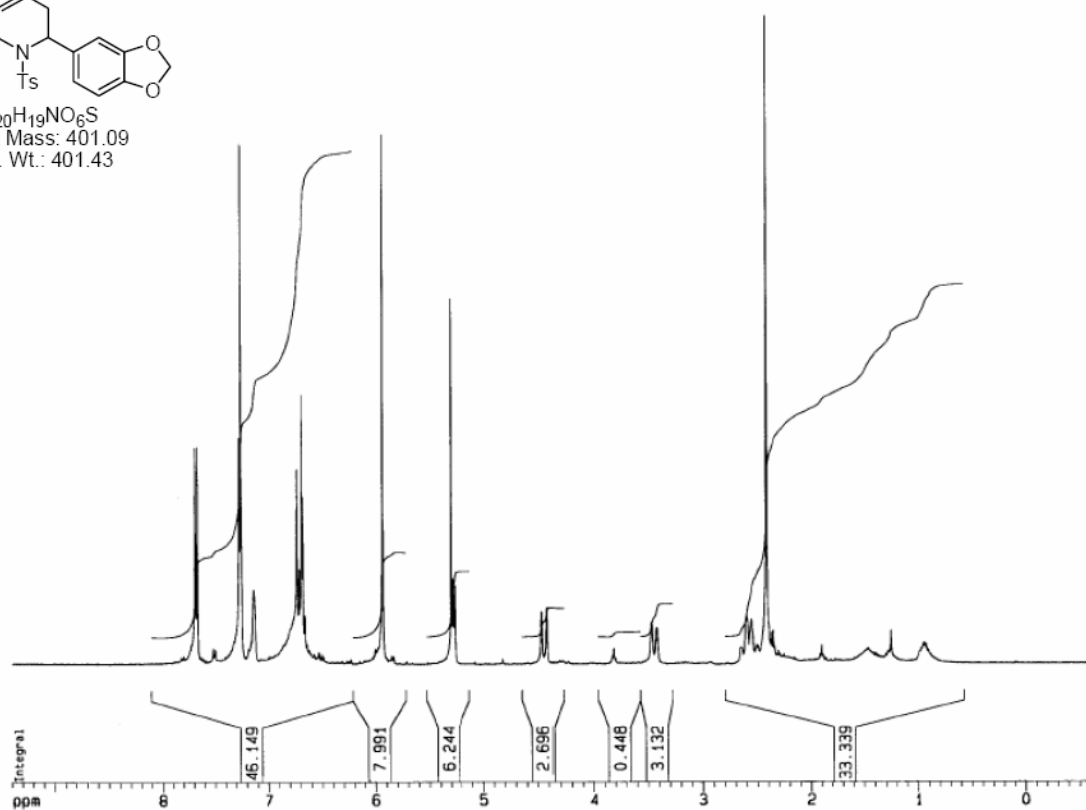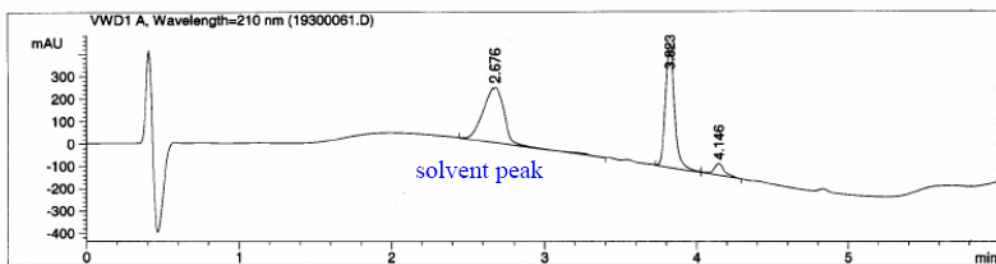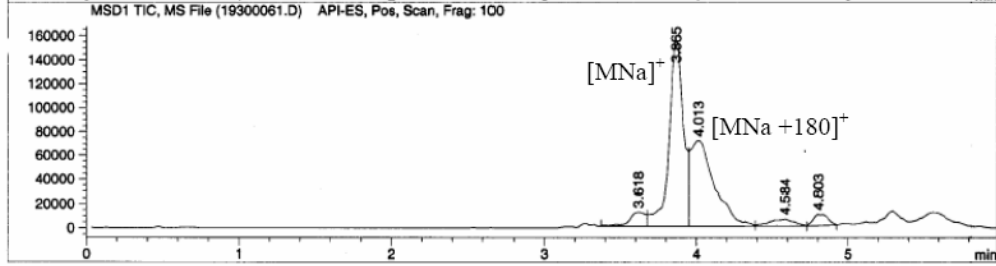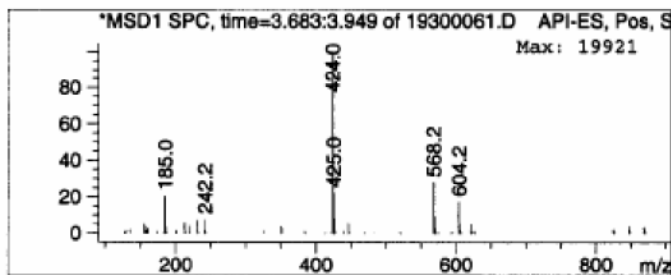

6-(4-Dimethylaminophenyl)-1-(4-toluenesulfonyl)-1,2,5,6-tetrahydropyridine-3-carboxylic acid (B01C07)

Not included.

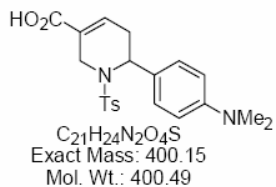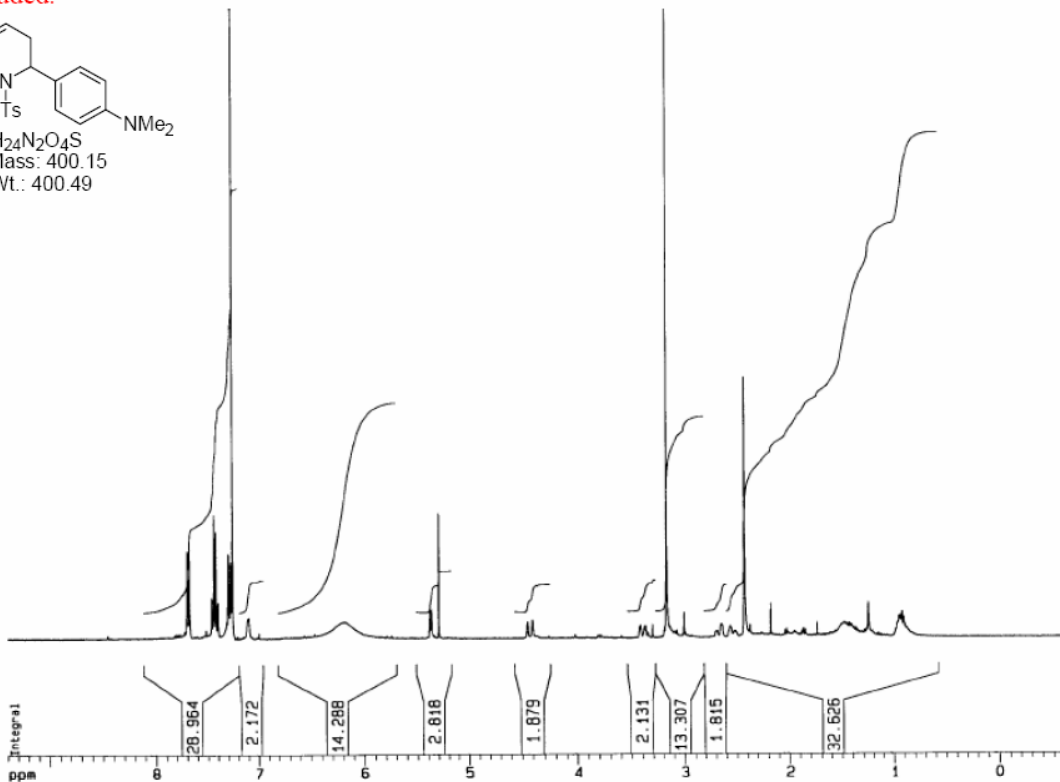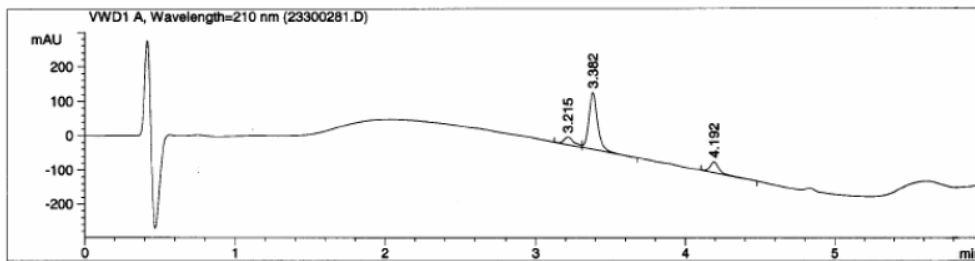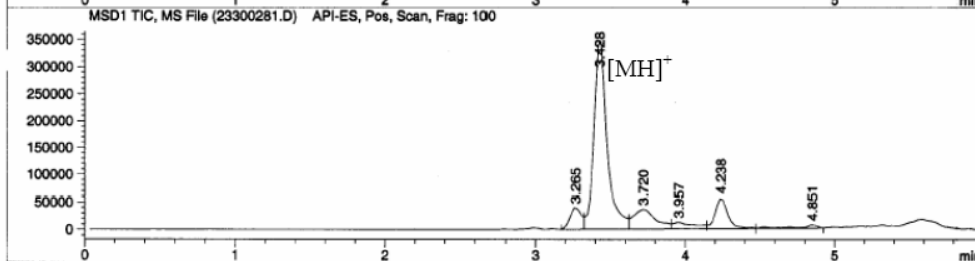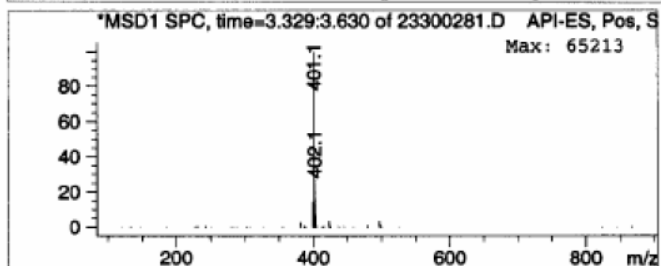

**6-(4-Diethylaminophenyl)-1-(4-toluenesulfonyl)-1,2,5,6-tetrahydropyridine-3-carboxylic acid (B01C08)**

Not included.

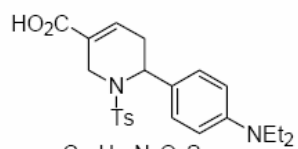

$C_{23}H_{28}N_2O_4S$   
Exact Mass: 428.18  
Mol. Wt.: 428.54

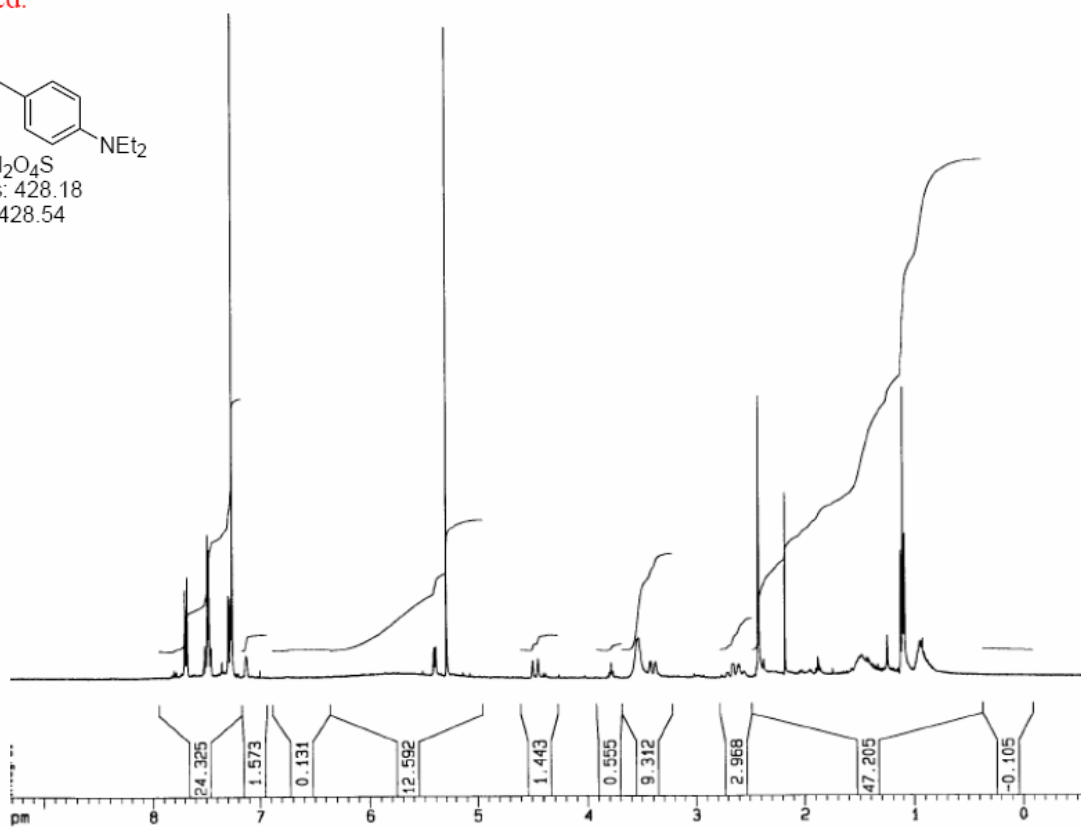

6-(4-Cyanophenyl)-1-(4-toluenesulfonyl)-1,2,5,6-tetrahydropyridine-3-carboxylic acid (B01C09)

Not included.

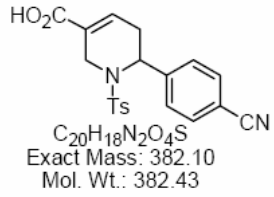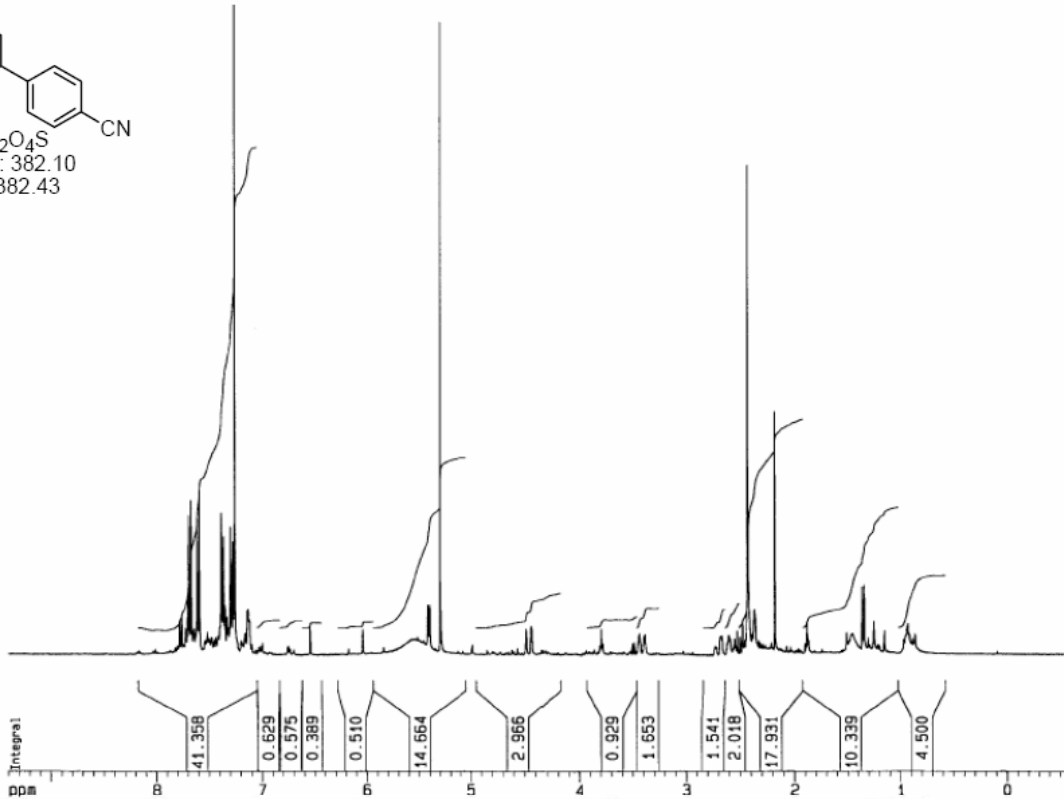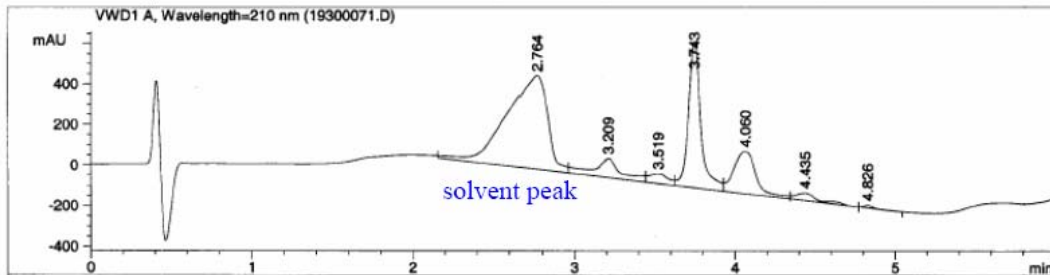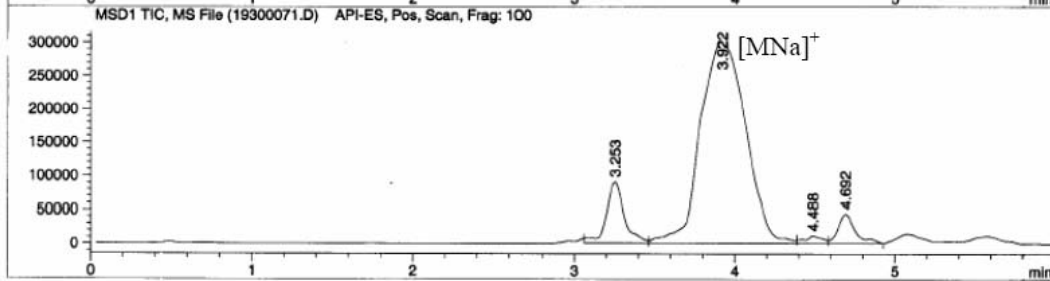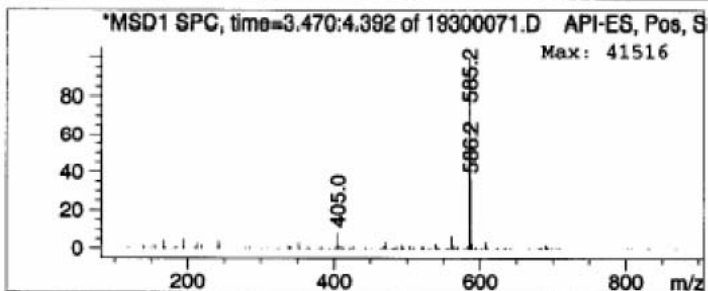

6-(2-Fluorophenyl)-1-(4-toluenesulfonyl)-1,2,5,6-tetrahydropyridine-3-carboxylic acid (B01C10)

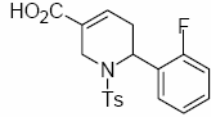

C<sub>19</sub>H<sub>18</sub>FNO<sub>4</sub>S  
 Exact Mass: 375.09  
 Mol. Wt.: 375.41

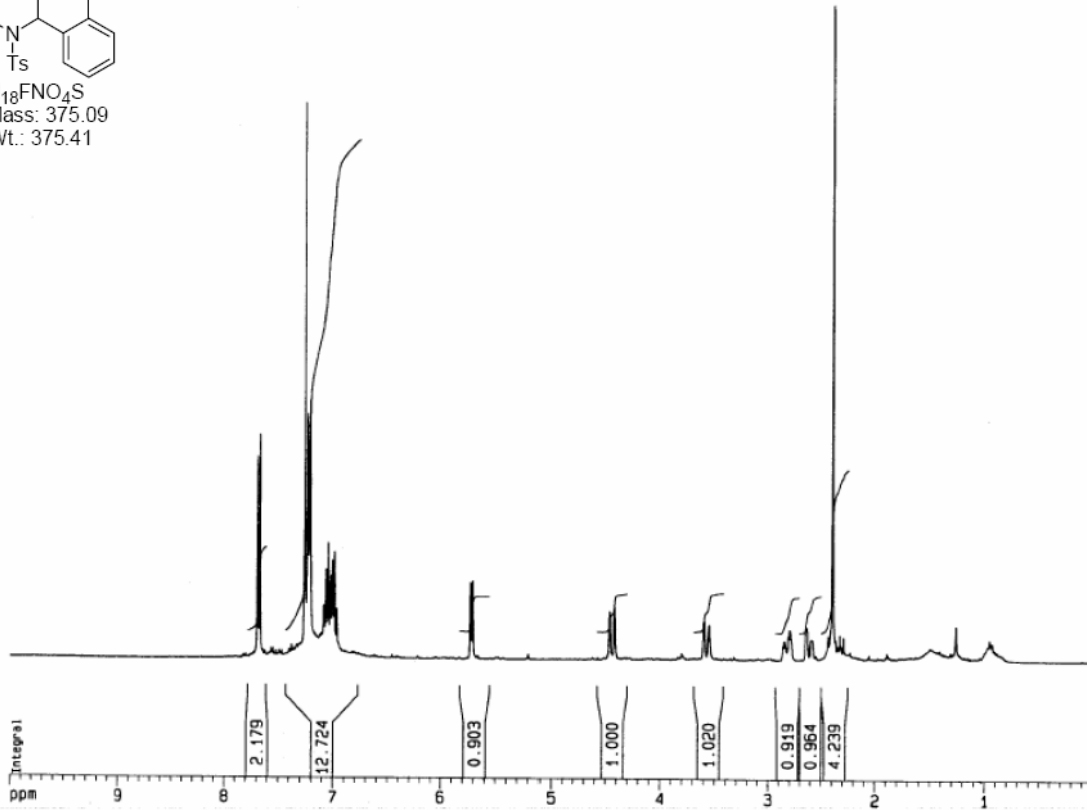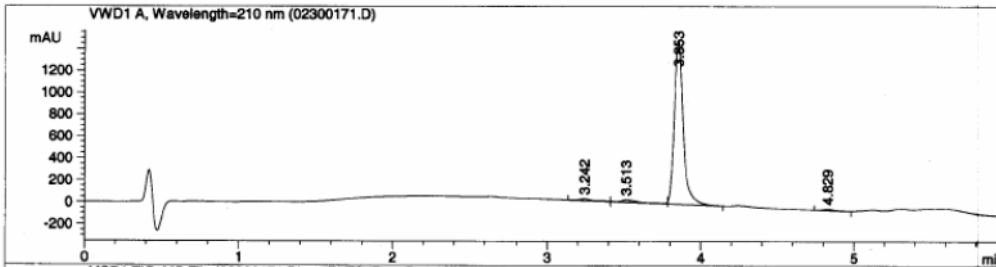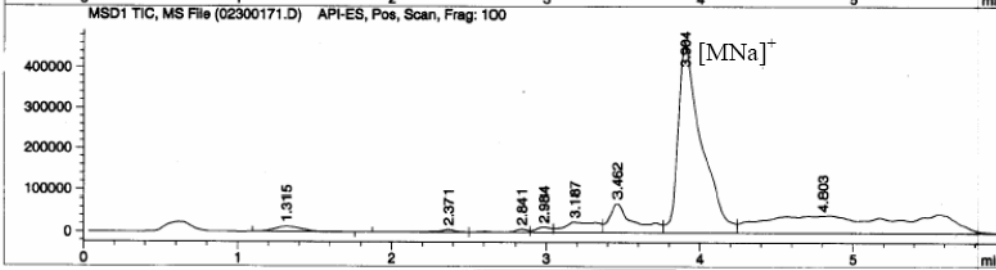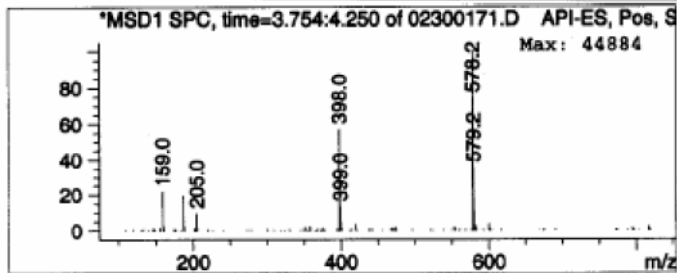

6-(4-Chlorophenyl)-1-(4-toluenesulfonyl)-1,2,5,6-tetrahydropyridine-3-carboxylic acid (B01C11)

Not included.

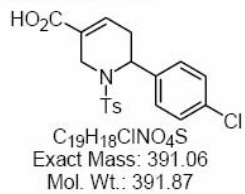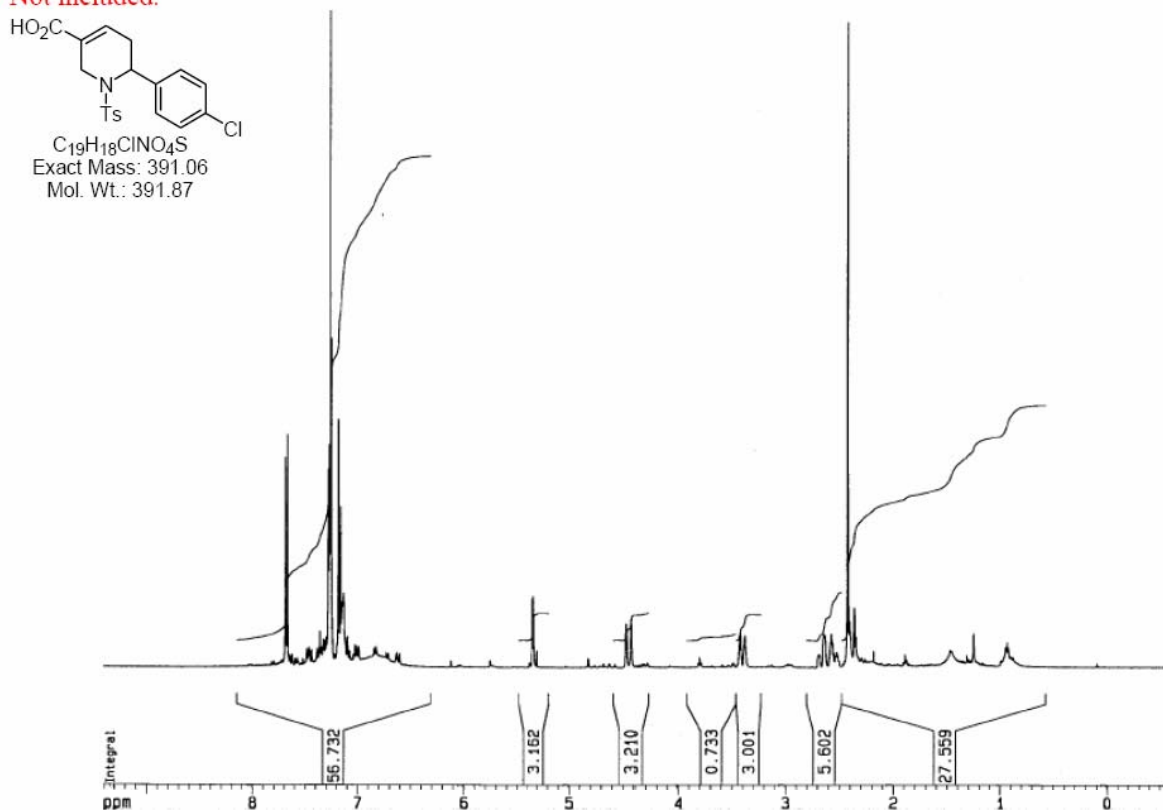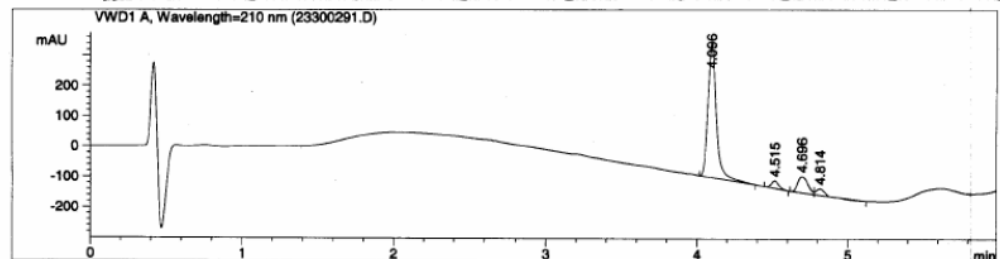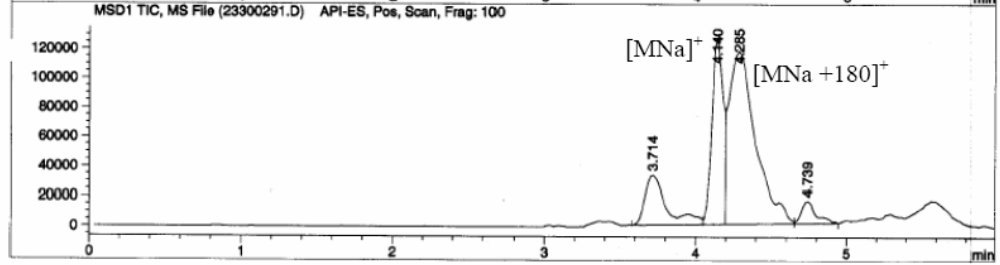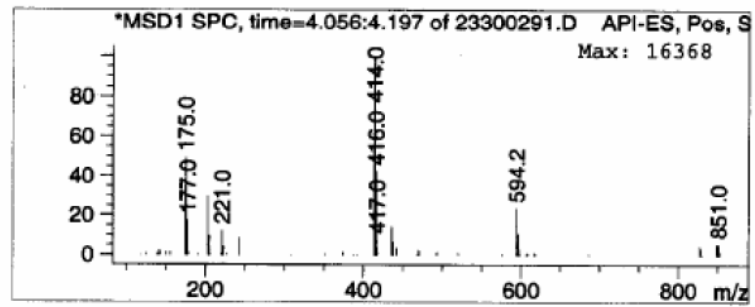



6-(3-Chlorophenyl)-1-(4-toluenesulfonyl)-1,2,5,6-tetrahydropyridine-3-carboxylic acid (B01C12)

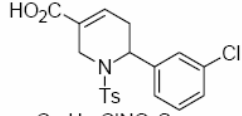

C<sub>19</sub>H<sub>18</sub>ClNO<sub>4</sub>S  
 Exact Mass: 391.06  
 Mol. Wt.: 391.87

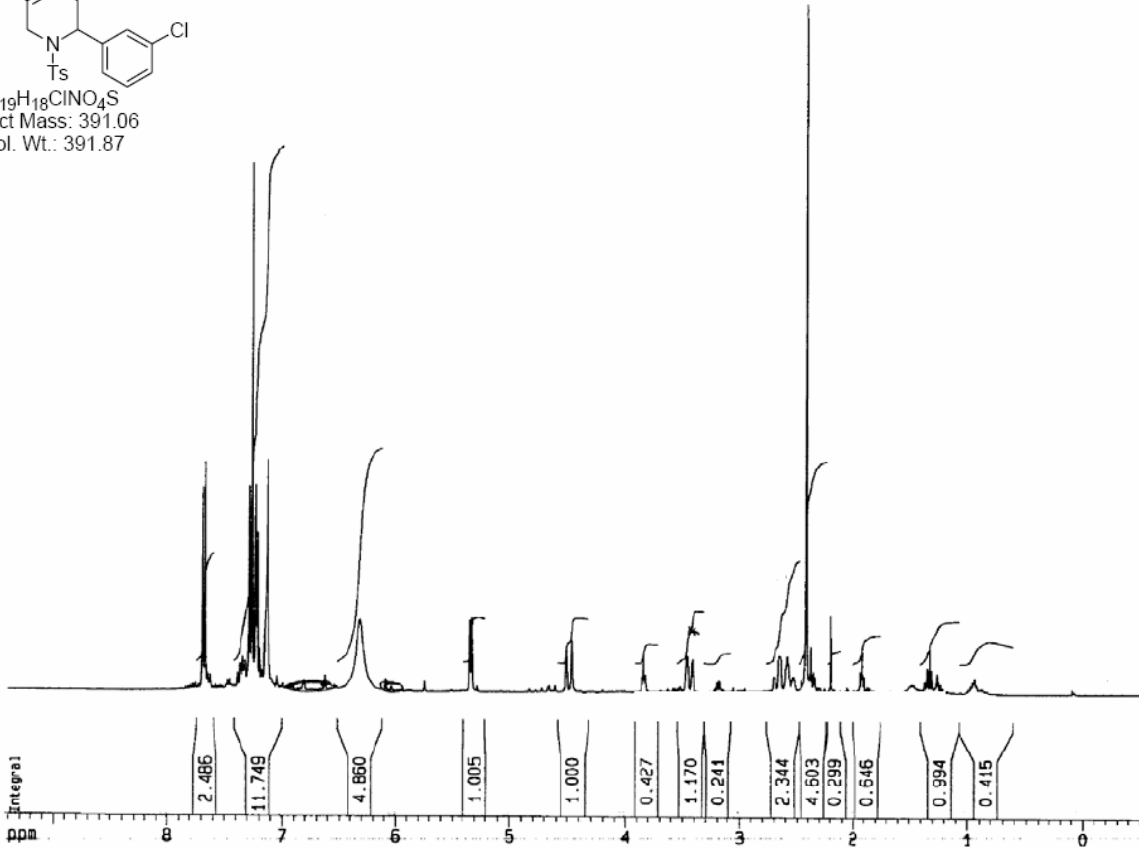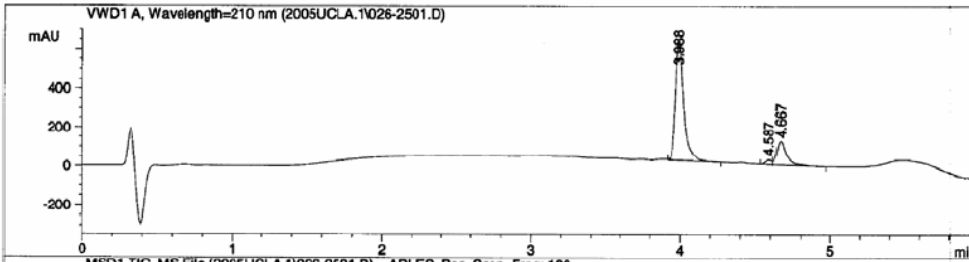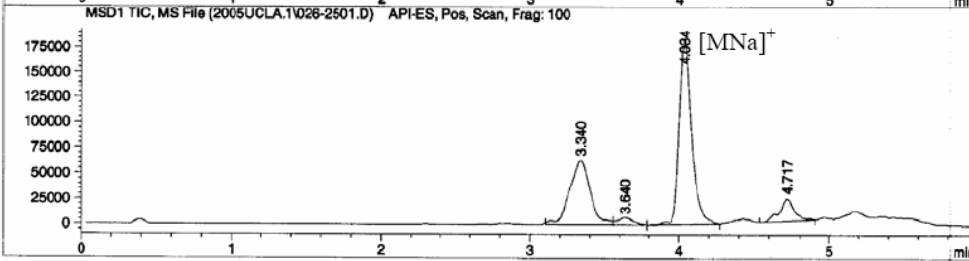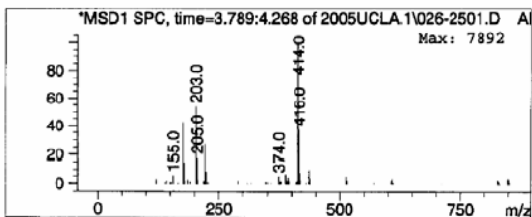

6-(3,4-Dichlorophenyl)-1-(4-toluenesulfonyl)-1,2,5,6-tetrahydropyridine-3-carboxylic acid (B01C13)  
Not included.

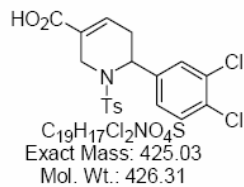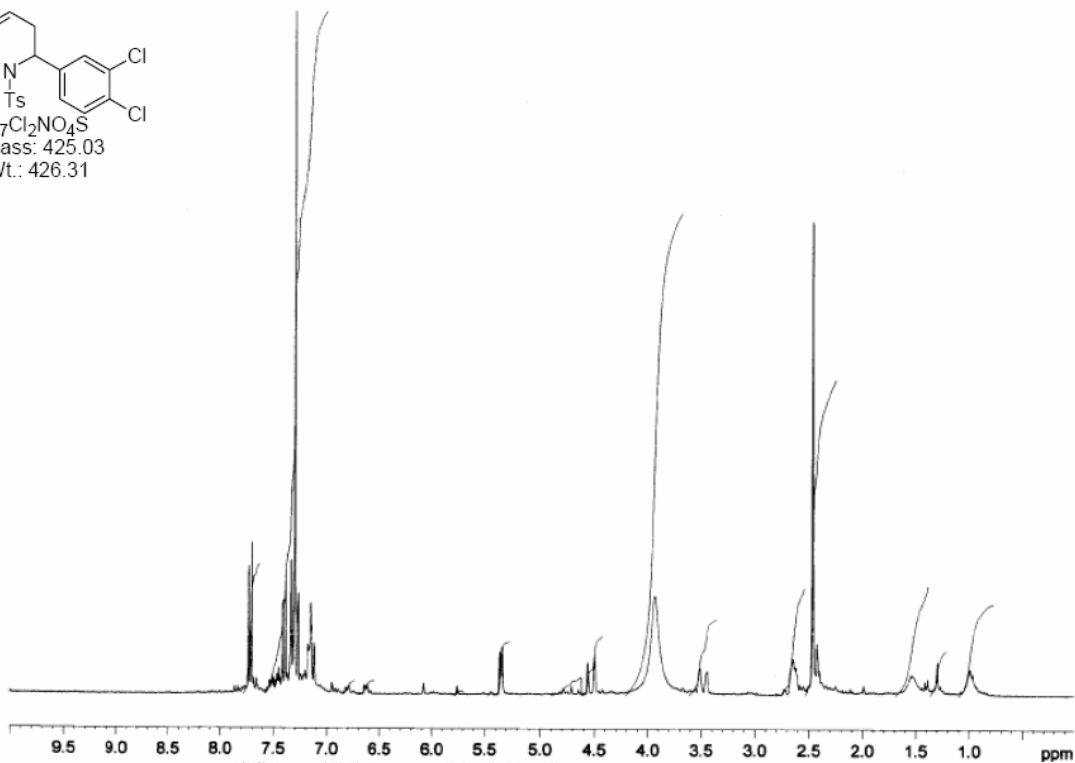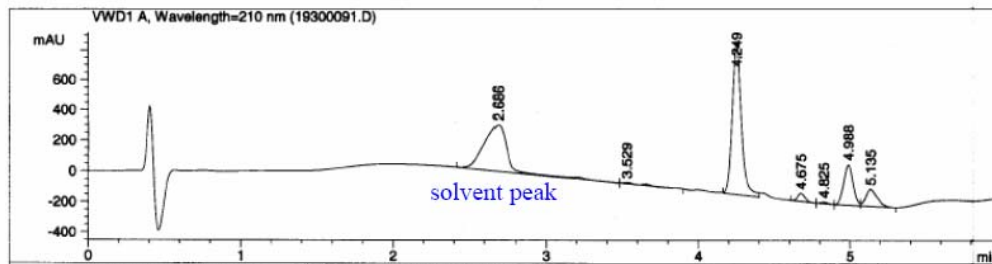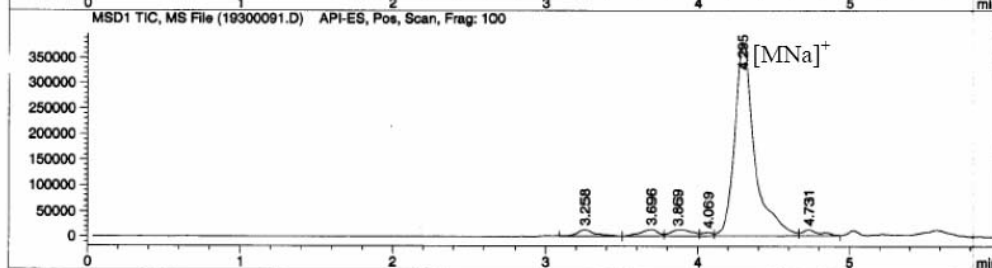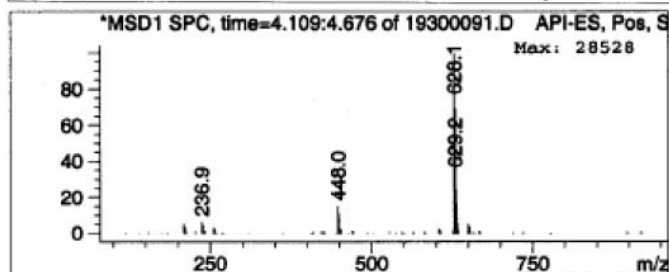

6-(4-Bromophenyl)-1-(4-toluenesulfonyl)-1,2,5,6-tetrahydropyridine-3-carboxylic acid (B01C14)

Not included.

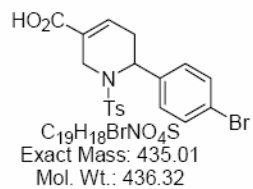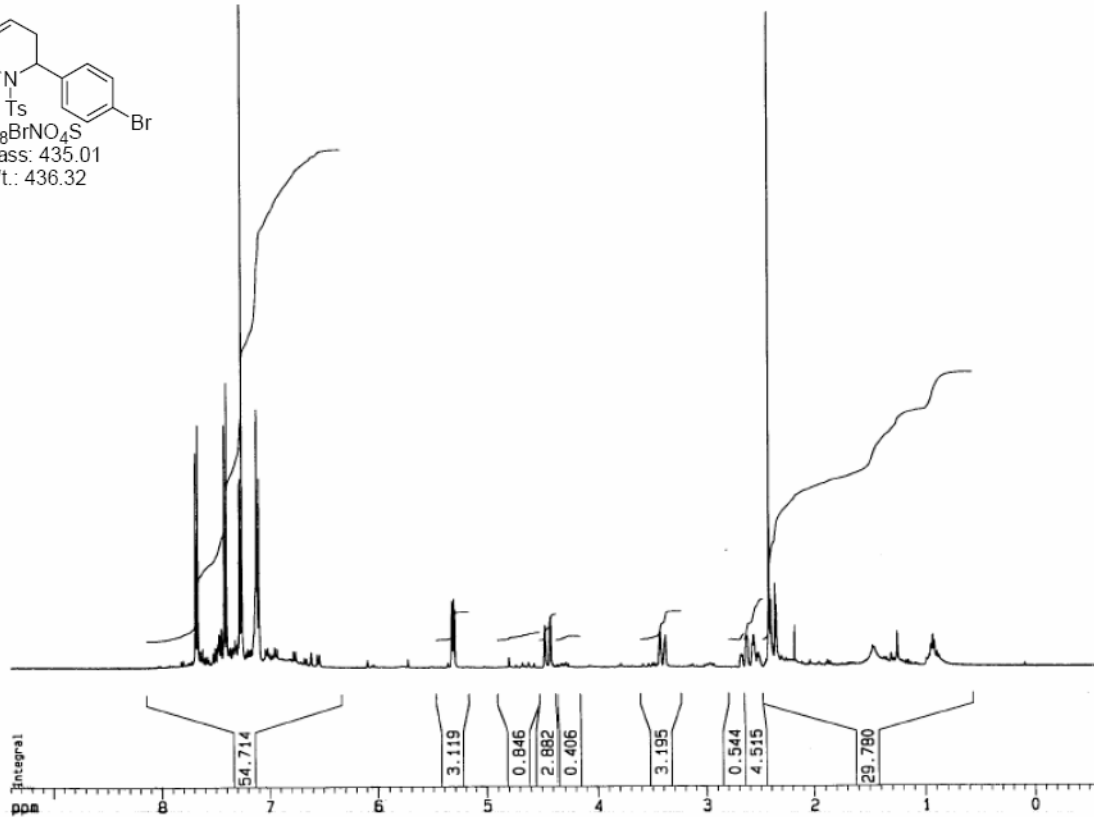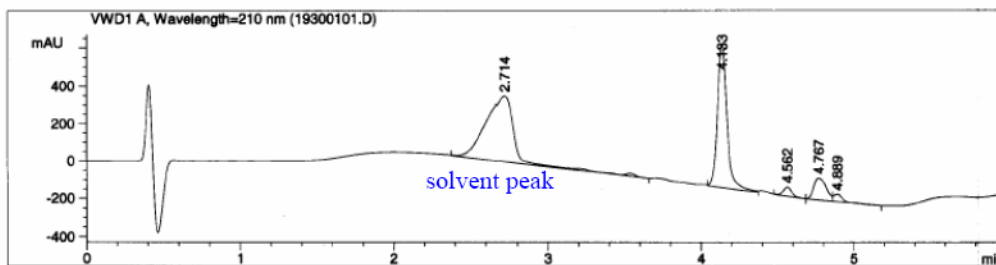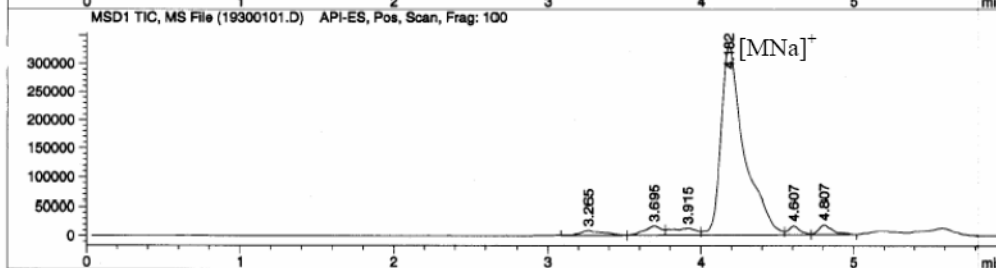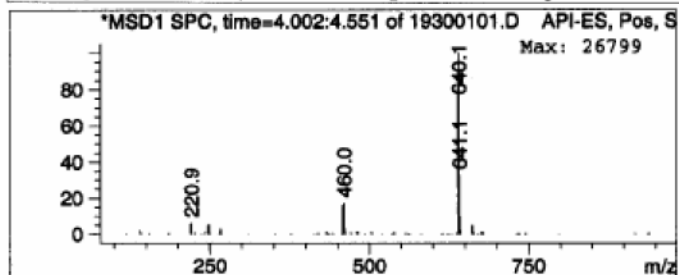

**6-(3-Bromophenyl)-1-(4-toluenesulfonyl)-1,2,5,6-tetrahydropyridine-3-carboxylic acid (B01C15)**  
 Not included.

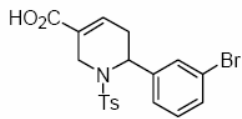

C<sub>19</sub>H<sub>18</sub>BrNO<sub>4</sub>S  
 Exact Mass: 435.01  
 Mol. Wt.: 436.32

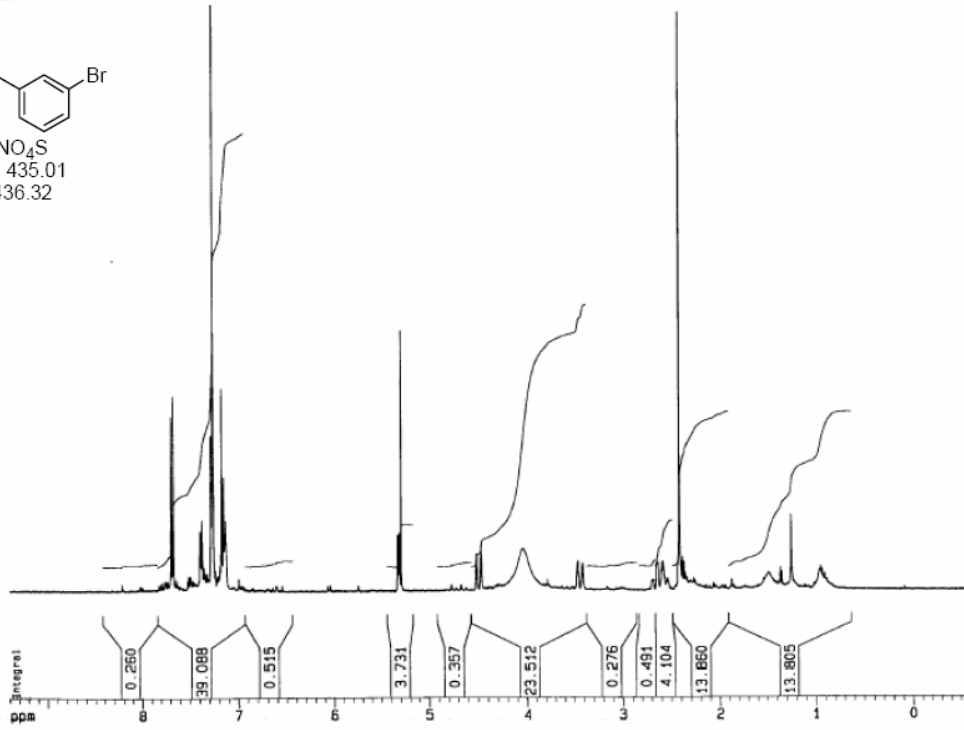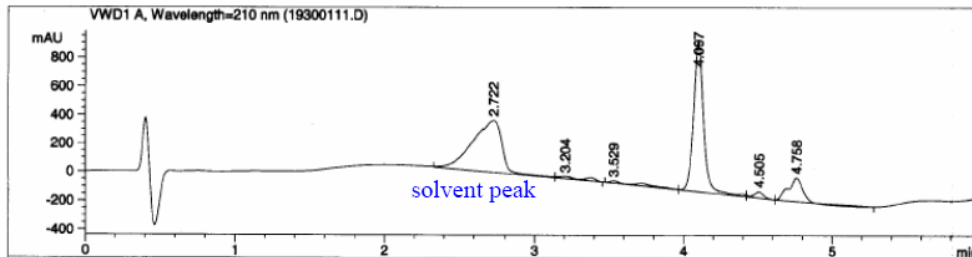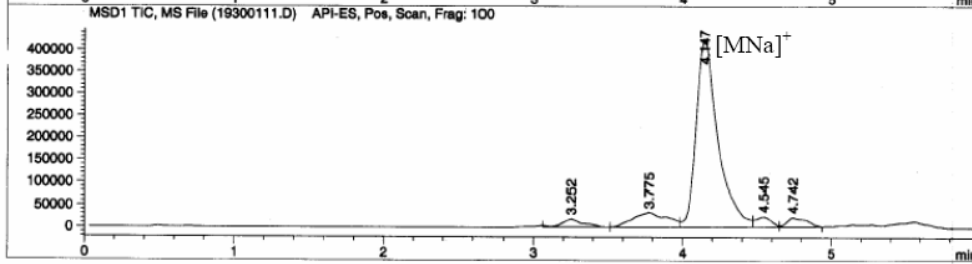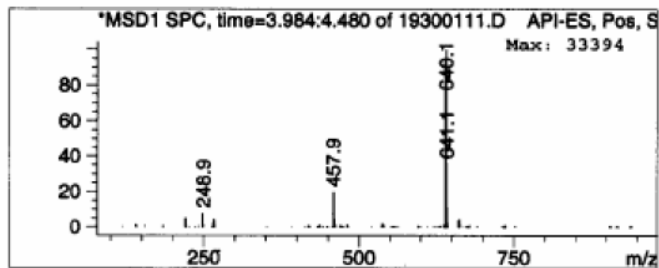

6-(Naphthalen-1-yl)-1-(4-toluenesulfonyl)-1,2,5,6-tetrahydropyridine-3-carboxylic acid (B01C16)

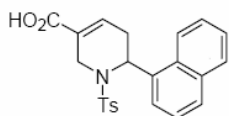

C<sub>23</sub>H<sub>21</sub>NO<sub>4</sub>S  
 Exact Mass: 407.12  
 Mol. Wt.: 407.48

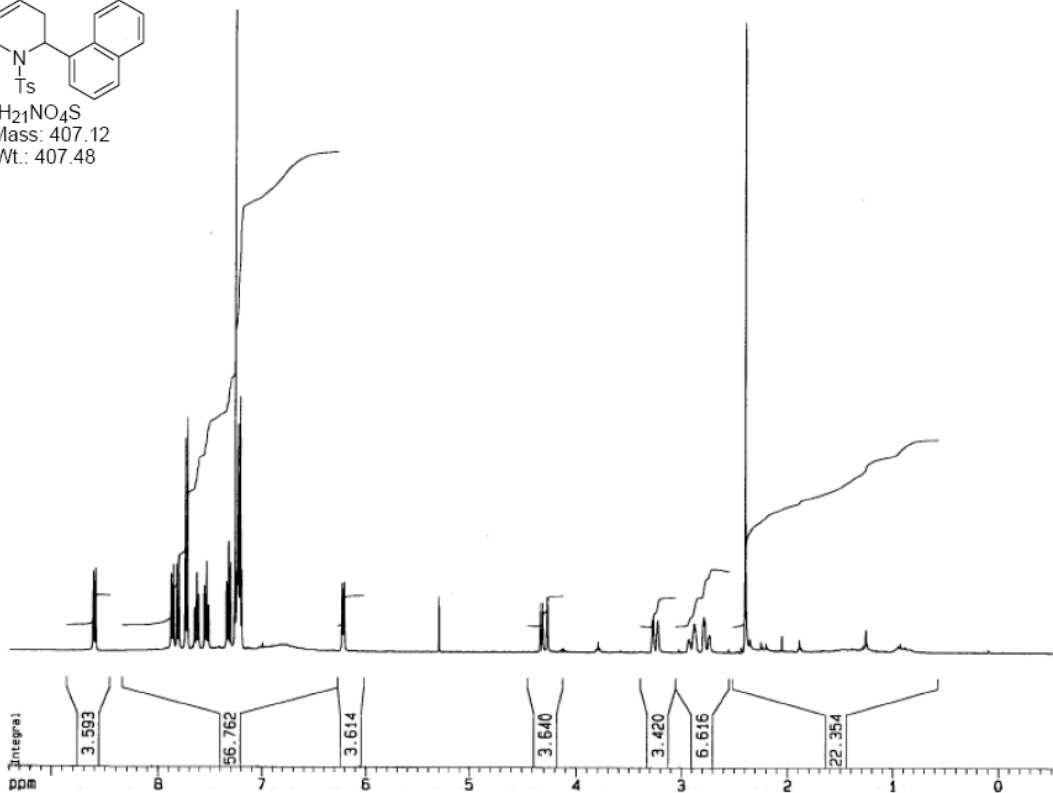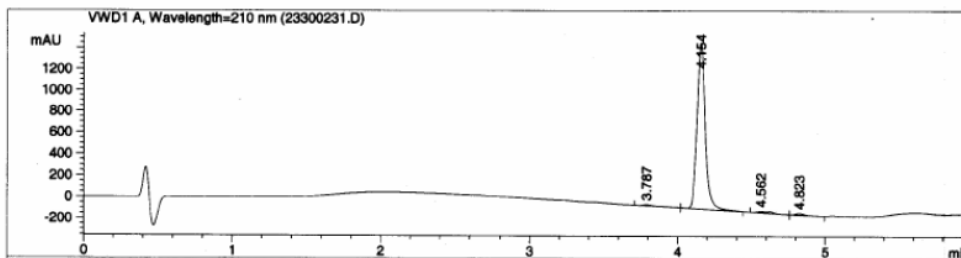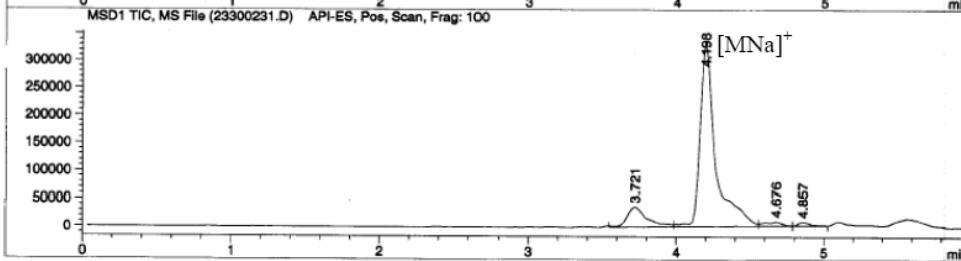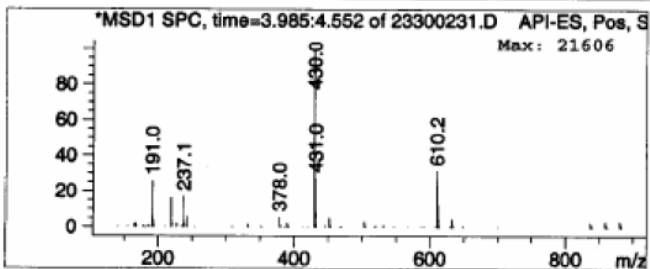

**6-(Furan-2-yl)-1-(4-toluenesulfonyl)-1,2,5,6-tetrahydropyridine-3-carboxylic acid (B01C17)**

Not included.

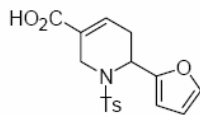

C<sub>17</sub>H<sub>17</sub>NO<sub>5</sub>S  
Exact Mass: 347.08  
Mol. Wt.: 347.39

**1-(4-Nitrobenzenesulfonyl)-6-phenyl-1,2,5,6-tetrahydropyridine-3-carboxylic acid (B01C18)**

Not included.

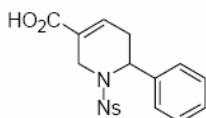

C<sub>18</sub>H<sub>16</sub>N<sub>2</sub>O<sub>6</sub>S  
Exact Mass: 388.07  
Mol. Wt.: 388.39

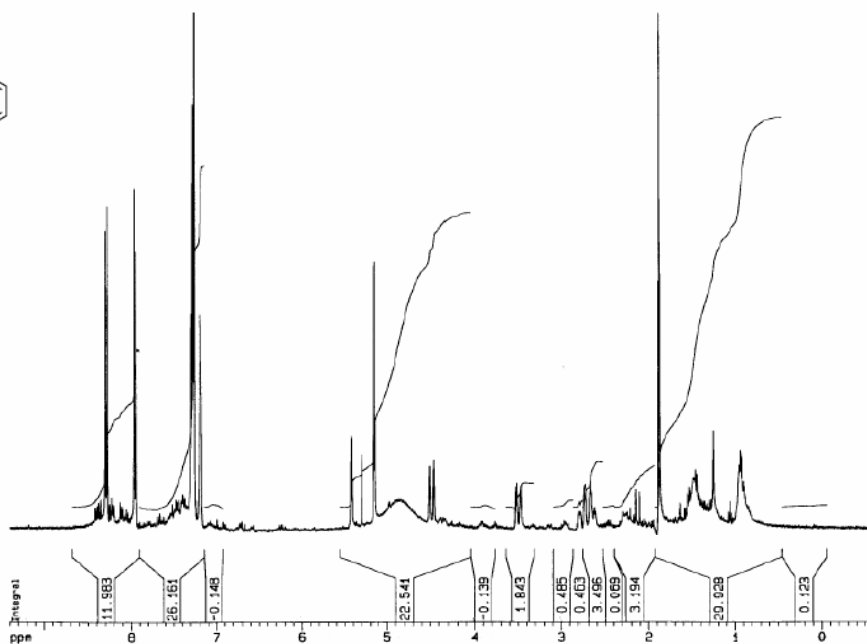

**1-Methanesulfonyl-6-phenyl-1,2,5,6-tetrahydropyridine-3-carboxylic acid (B01C19)**

Not included.

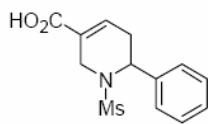

C<sub>13</sub>H<sub>15</sub>NO<sub>4</sub>S  
Exact Mass: 281.07  
Mol. Wt.: 281.33

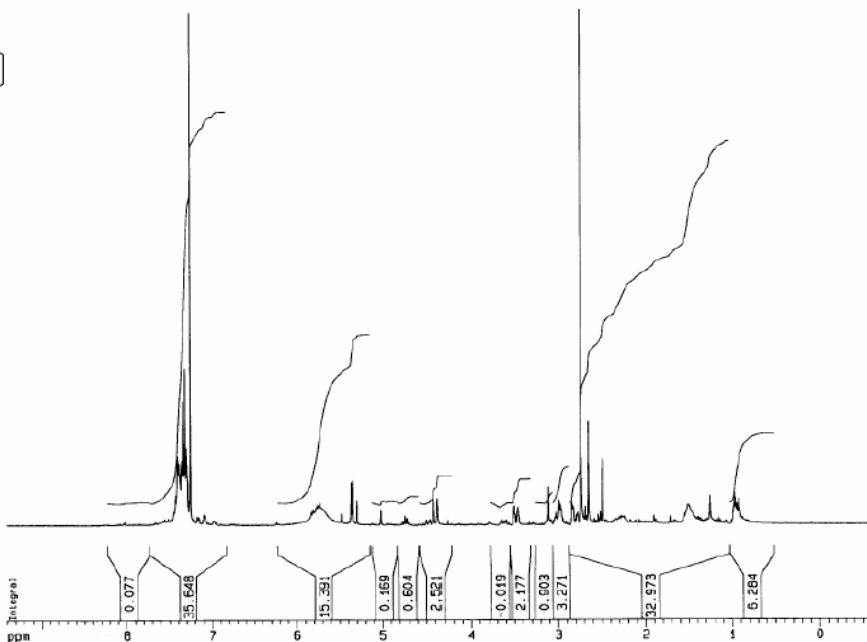

6-(3,4-Dimethoxyphenyl)-1-(4-toluenesulfonyl)-1,2,5,6-tetrahydropyridine-3-carboxylic acid (B01C20)

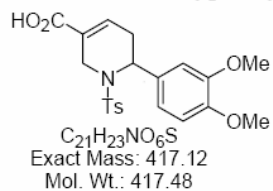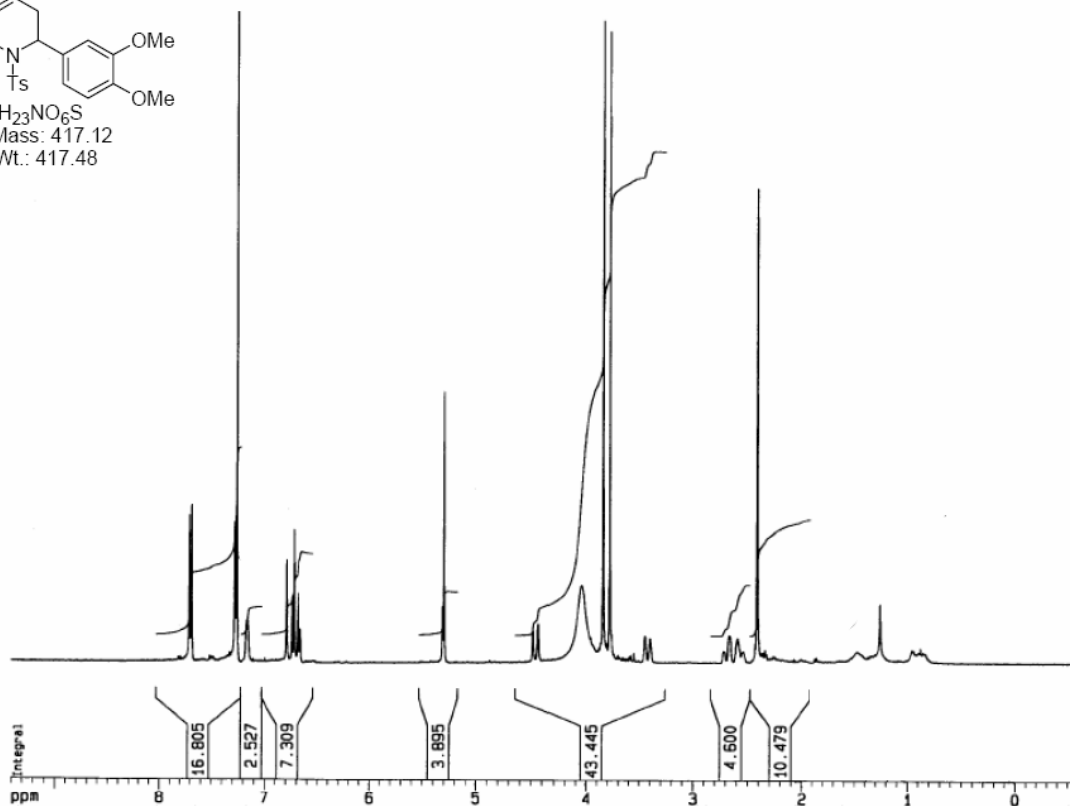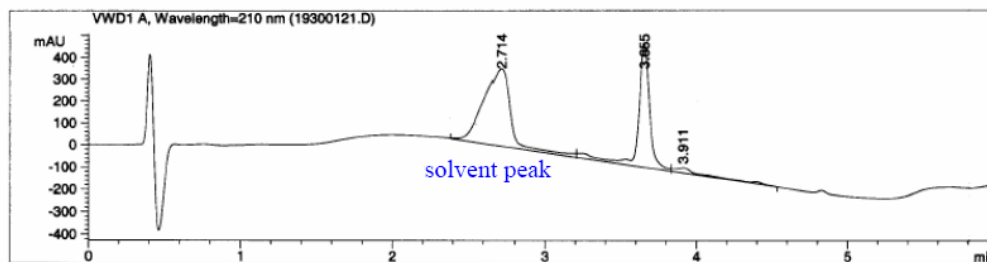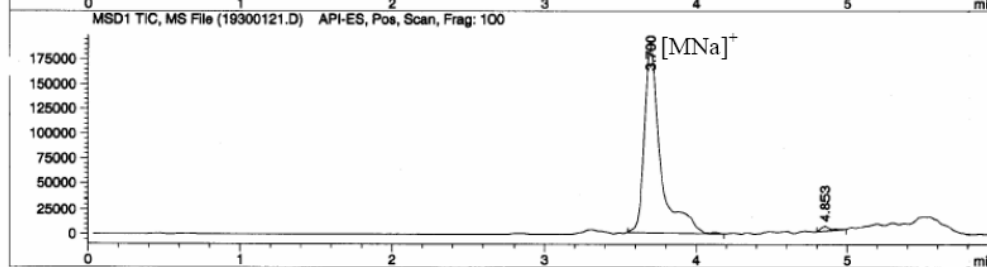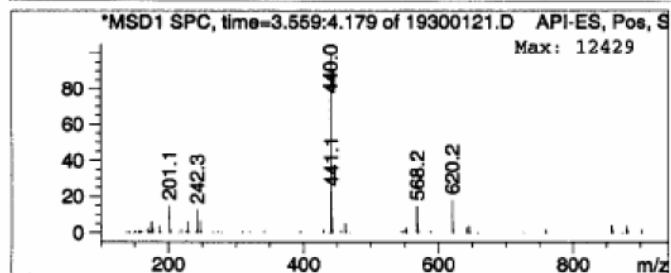

6-(Thiophen-2-yl)-1-(4-toluenesulfonyl)-1,2,5,6-tetrahydropyridine-3-carboxylic acid (B01C21)

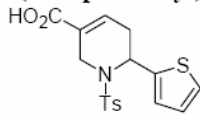

C<sub>17</sub>H<sub>17</sub>NO<sub>4</sub>S<sub>2</sub>  
 Exact Mass: 363.06  
 Mol. Wt.: 363.45

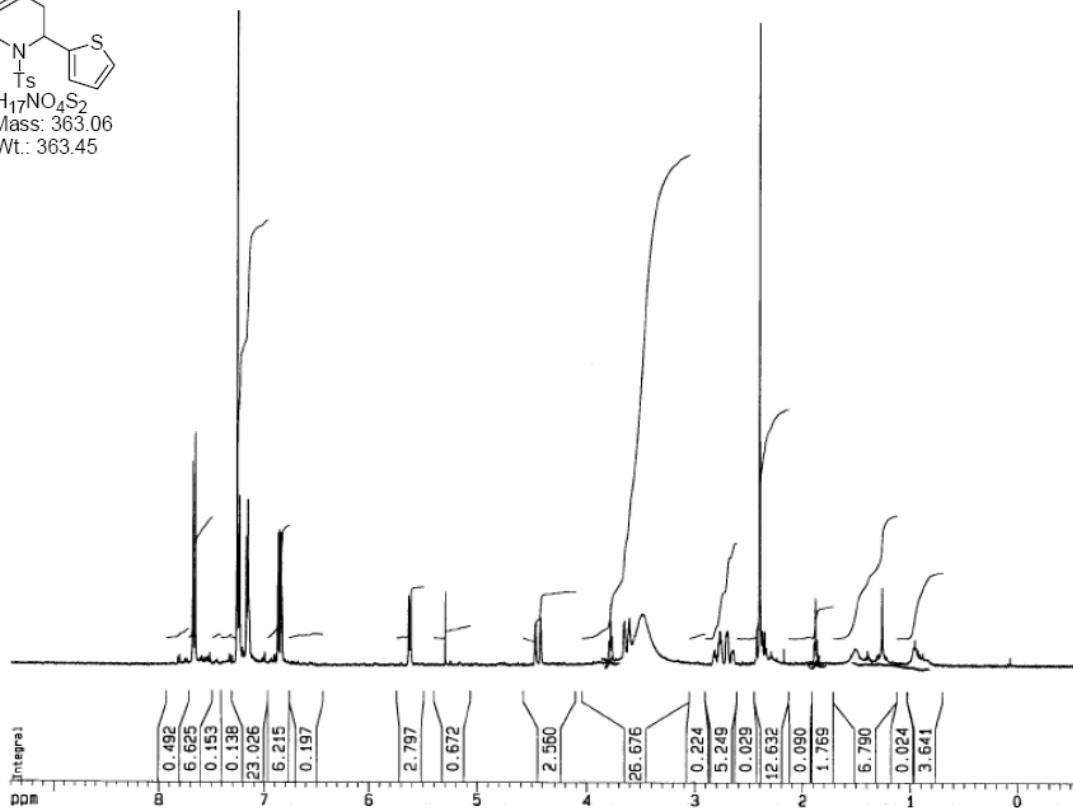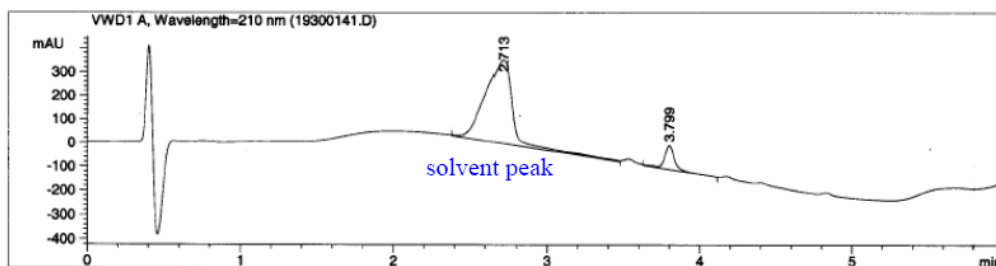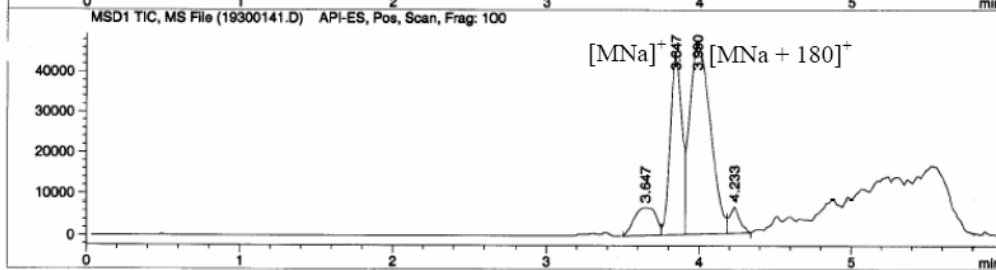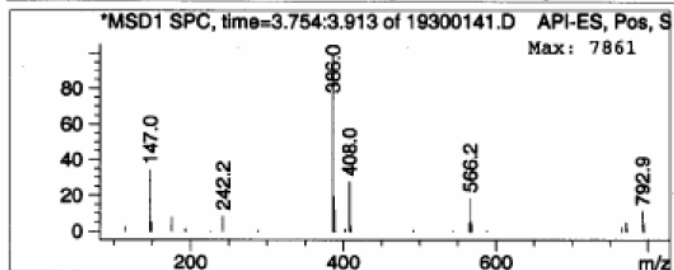



6-(5-Methylfuran-2-yl)-1-(4-toluenesulfonyl)-1,2,5,6-tetrahydropyridine-3-carboxylic acid (B01C22)

Not included.

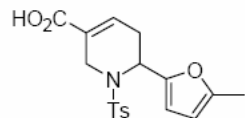

$C_{18}H_{19}NO_5S$   
Exact Mass: 361.10  
Mol. Wt.: 361.41

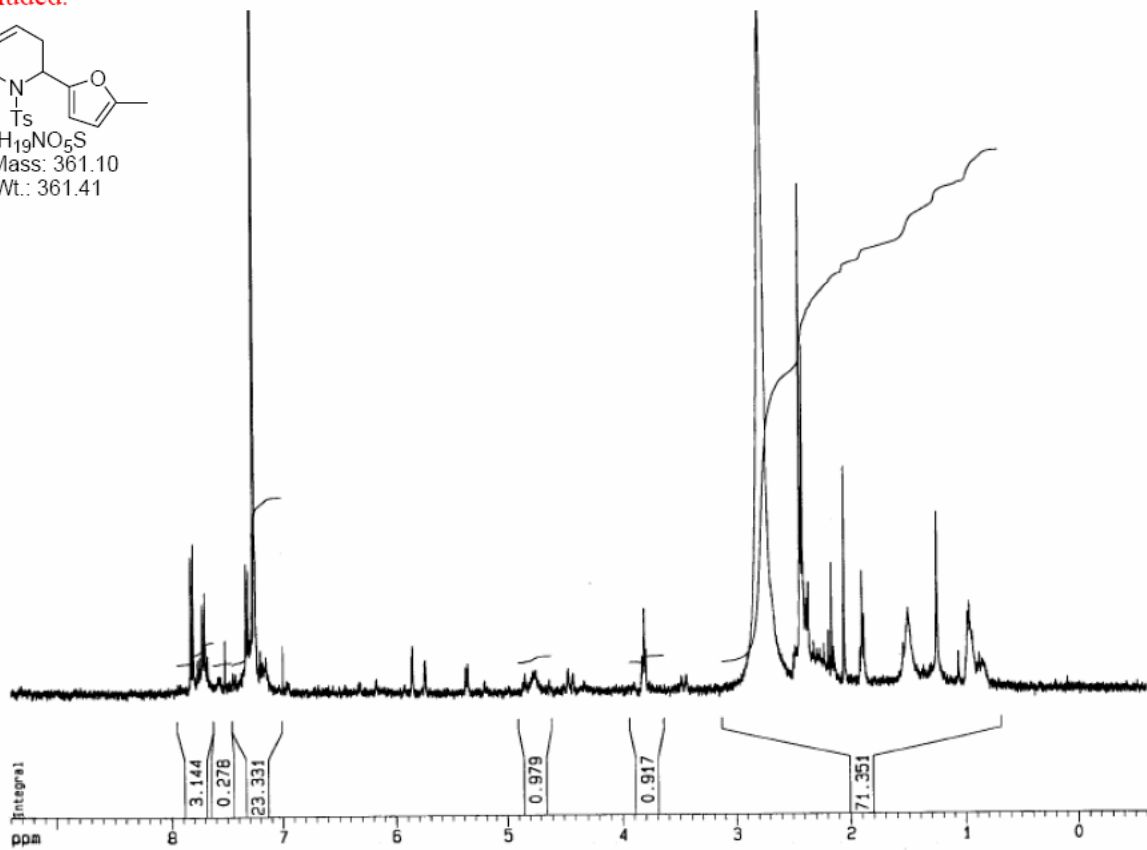

# 6-(4-Fluorophenyl)-1-(4-toluenesulfonyl)-1,2,5,6-tetrahydropyridine-3-carboxylic acid (B01C23)

Not included.

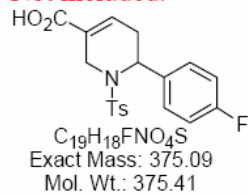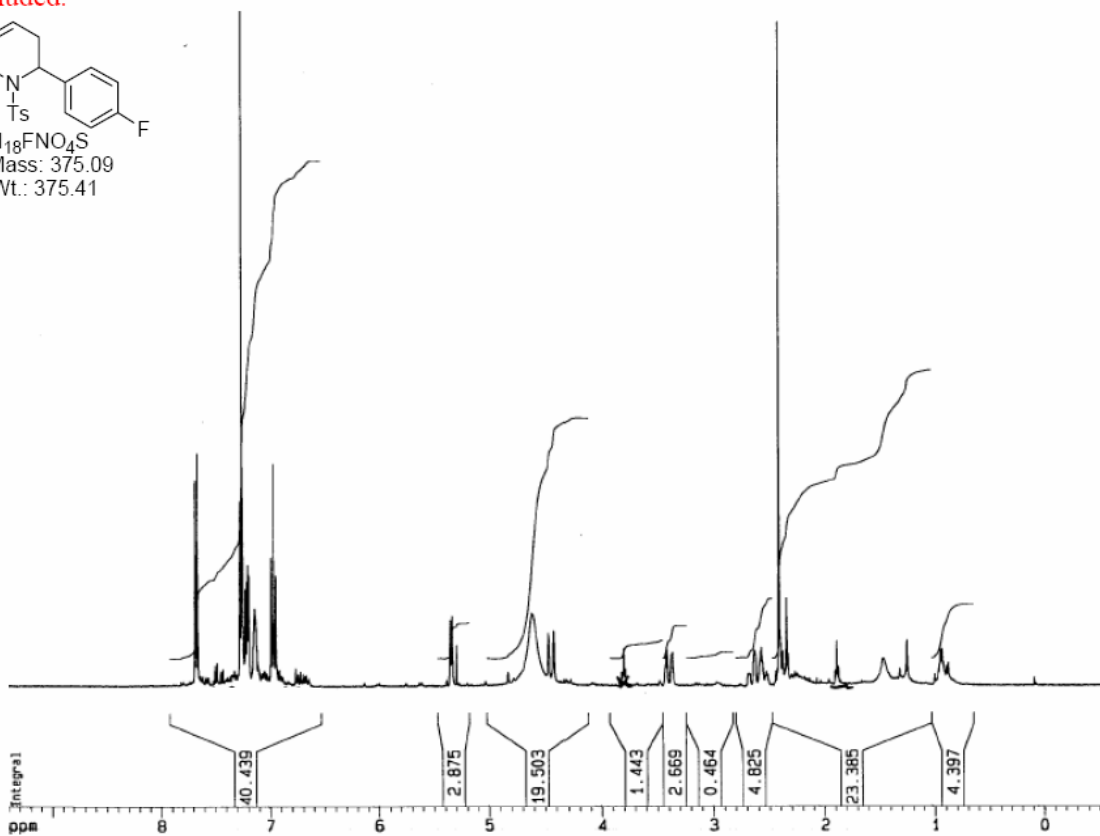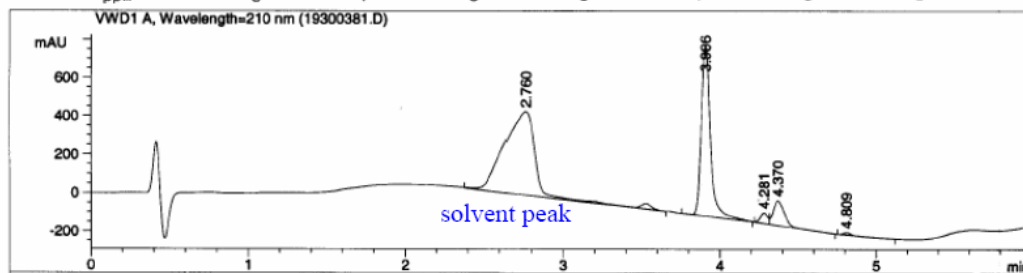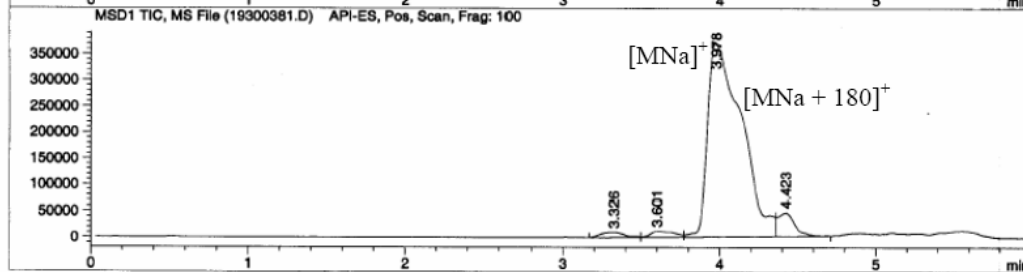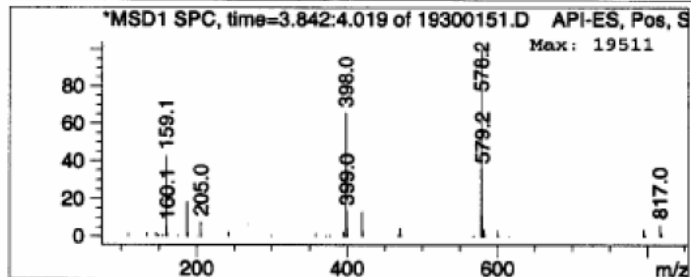

6-(4-Isopropylphenyl)-1-(4-toluenesulfonyl)-1,2,5,6-tetrahydropyridine-3-carboxylic acid (B01C24)

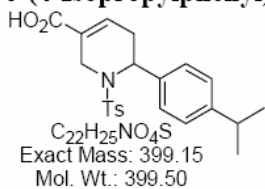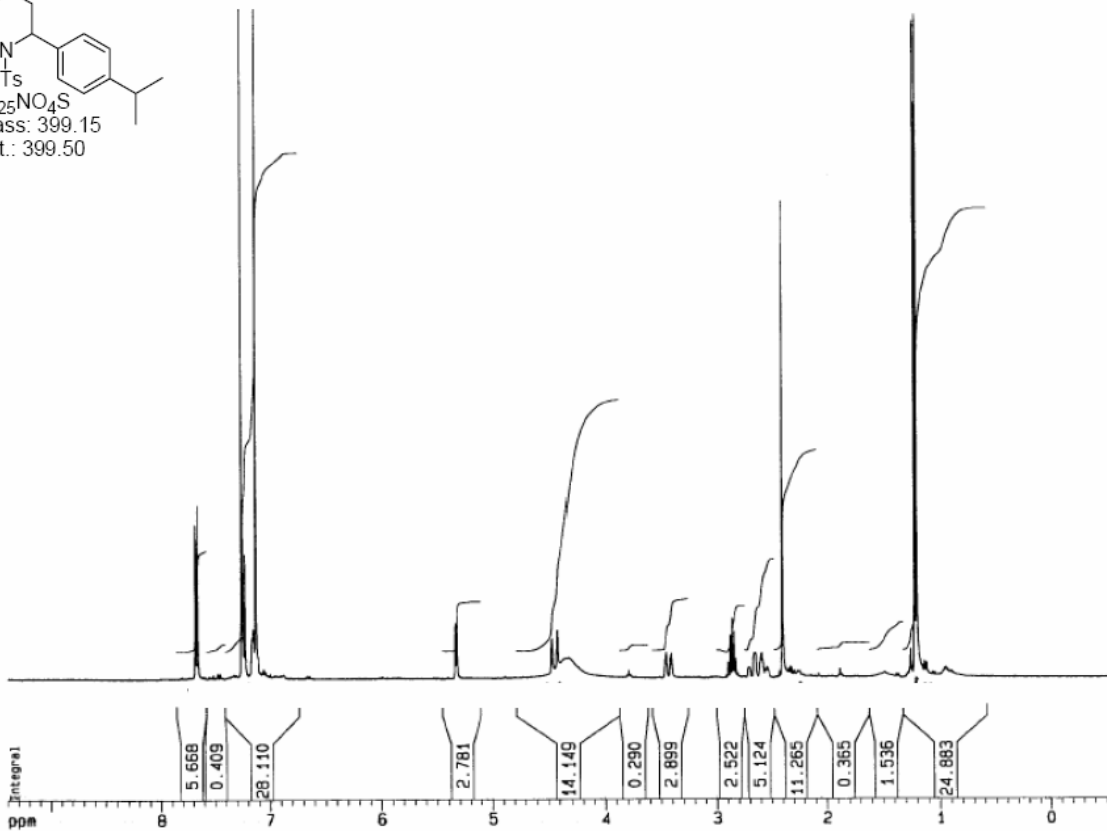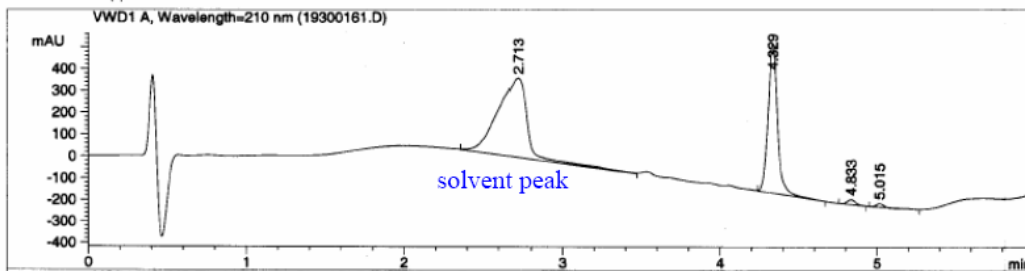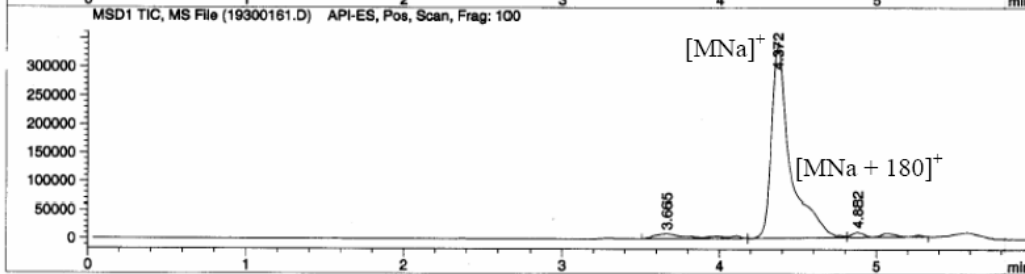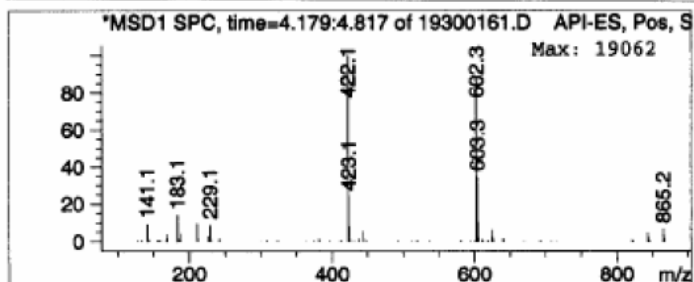

1-(4-Toluenesulfonyl)-6-(3,4,5-trimethoxyphenyl)-1,2,5,6-tetrahydropyridine-3-carboxylic acid (B01C25)

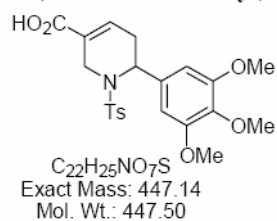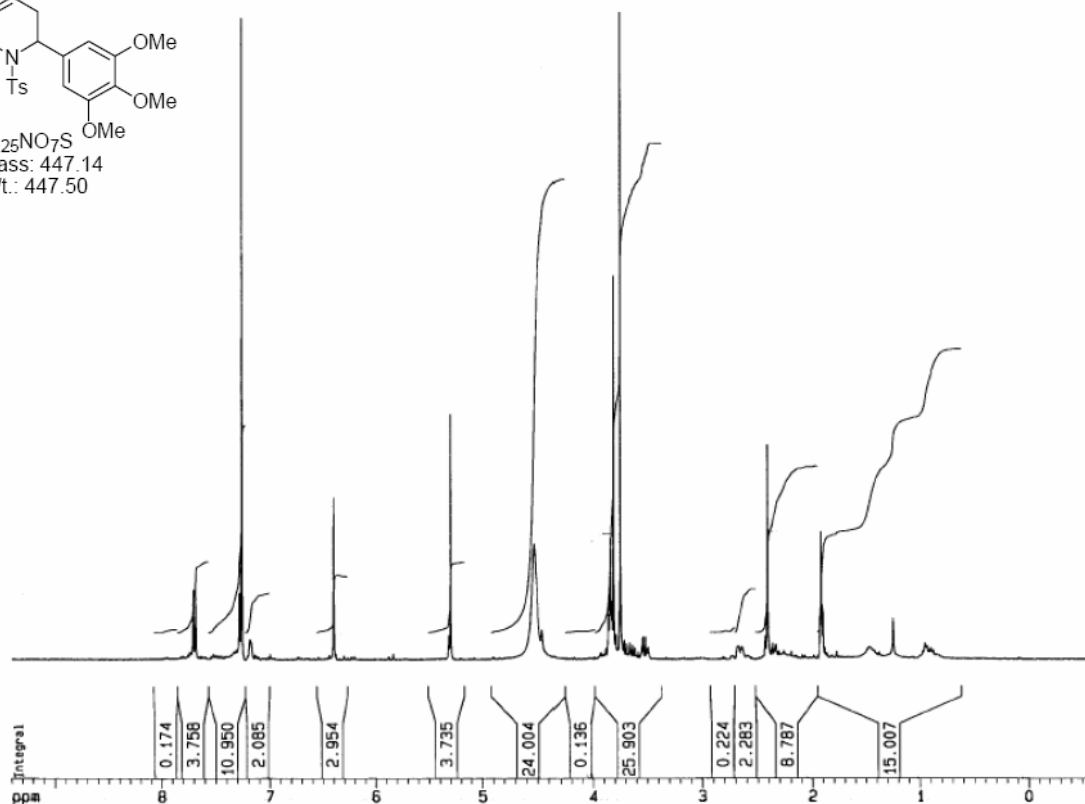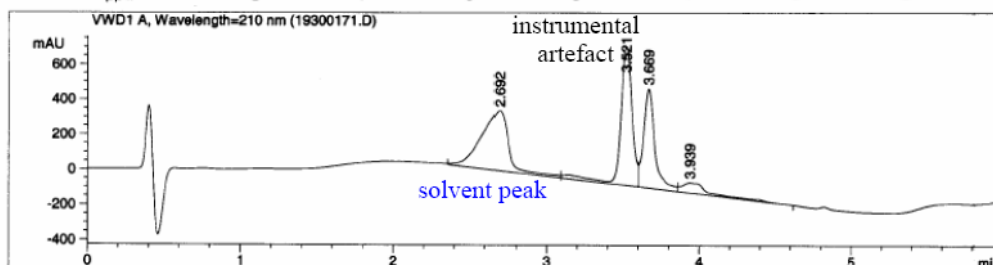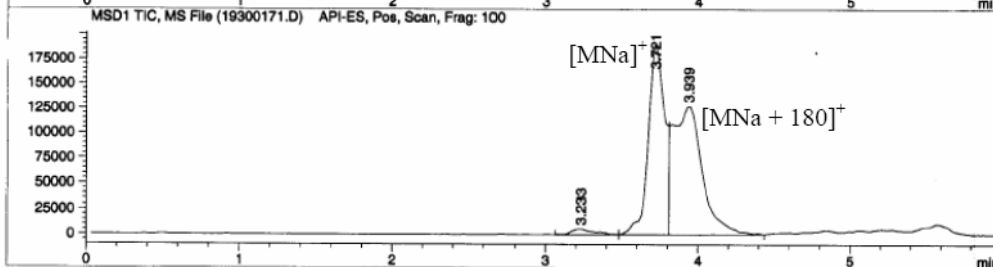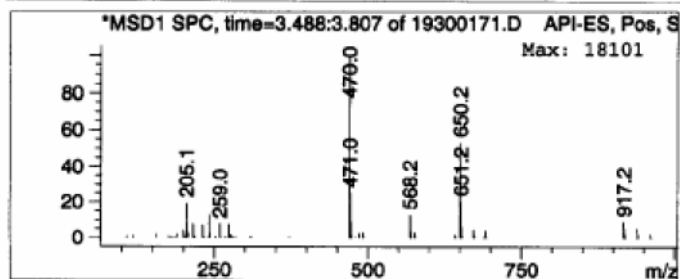

6-(3-Fluorophenyl)-1-(4-toluenesulfonyl)-1,2,5,6-tetrahydropyridine-3-carboxylic acid (B01C26)  
Not included.

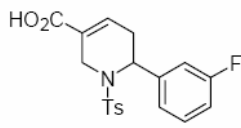

C<sub>19</sub>H<sub>18</sub>FNO<sub>4</sub>S  
Exact Mass: 375.09  
Mol. Wt.: 375.41

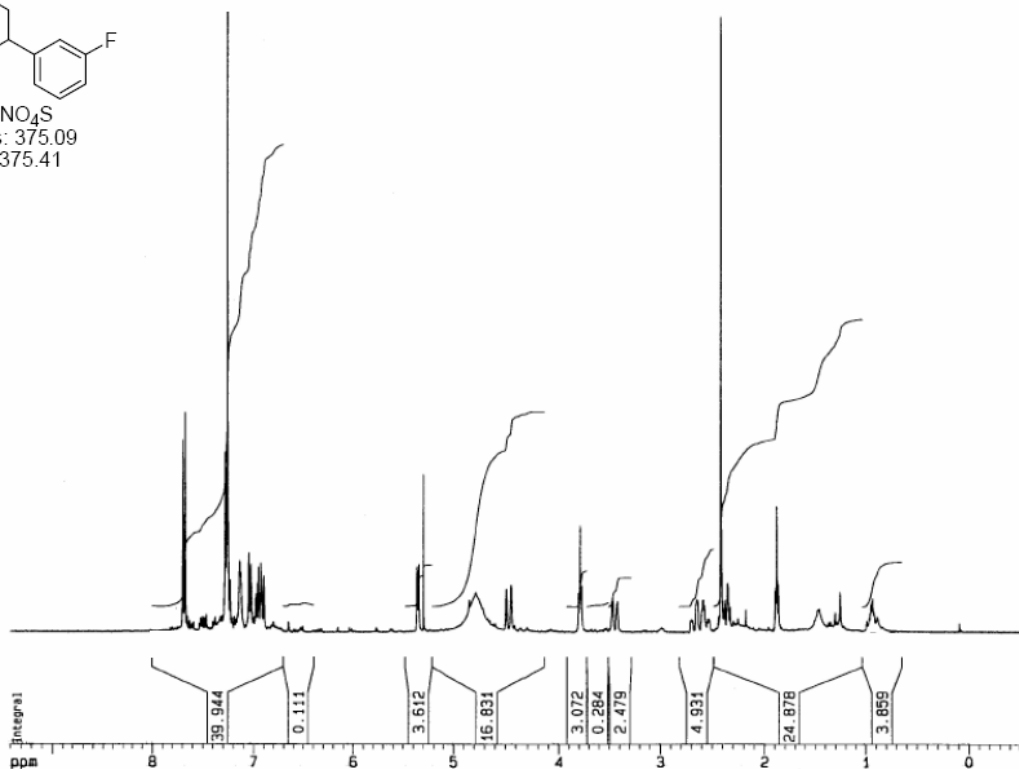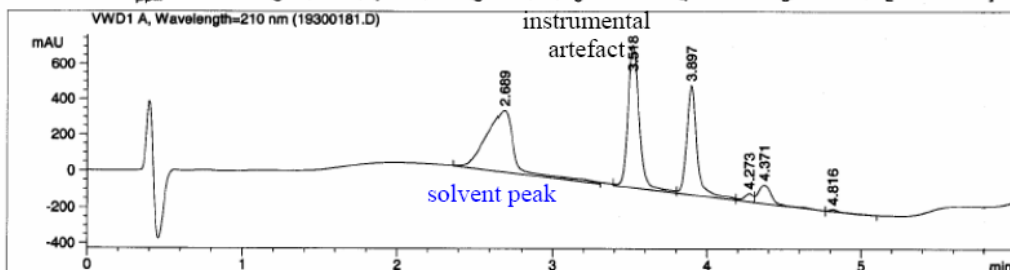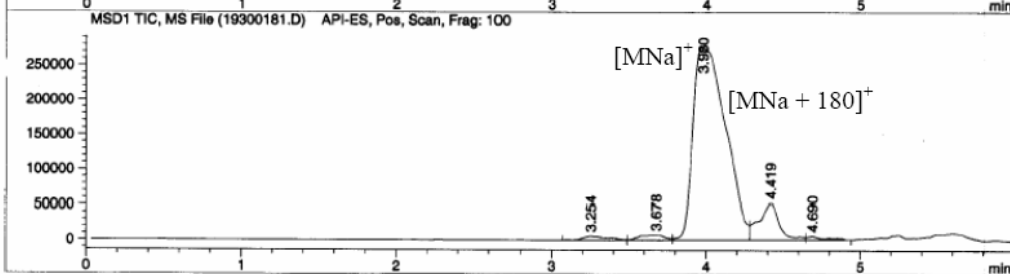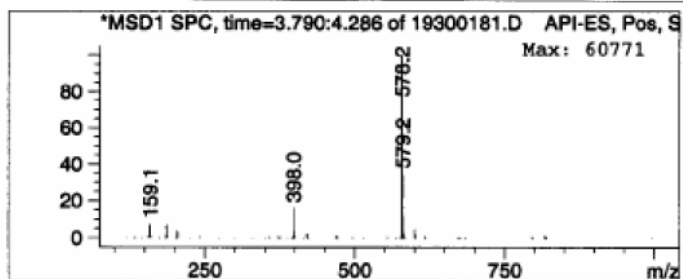

**1-(4-Chlorobenzenesulfonyl)-6-(4-chlorophenyl)-1,2,5,6-tetrahydropyridine-3-carboxylic acid (B01C27)**

Not included.

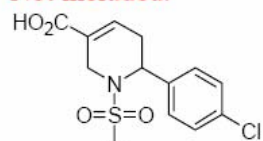

C<sub>18</sub>H<sub>15</sub>Cl<sub>2</sub>NO<sub>4</sub>S  
Exact Mass: 411.01  
Mol. Wt.: 412.29

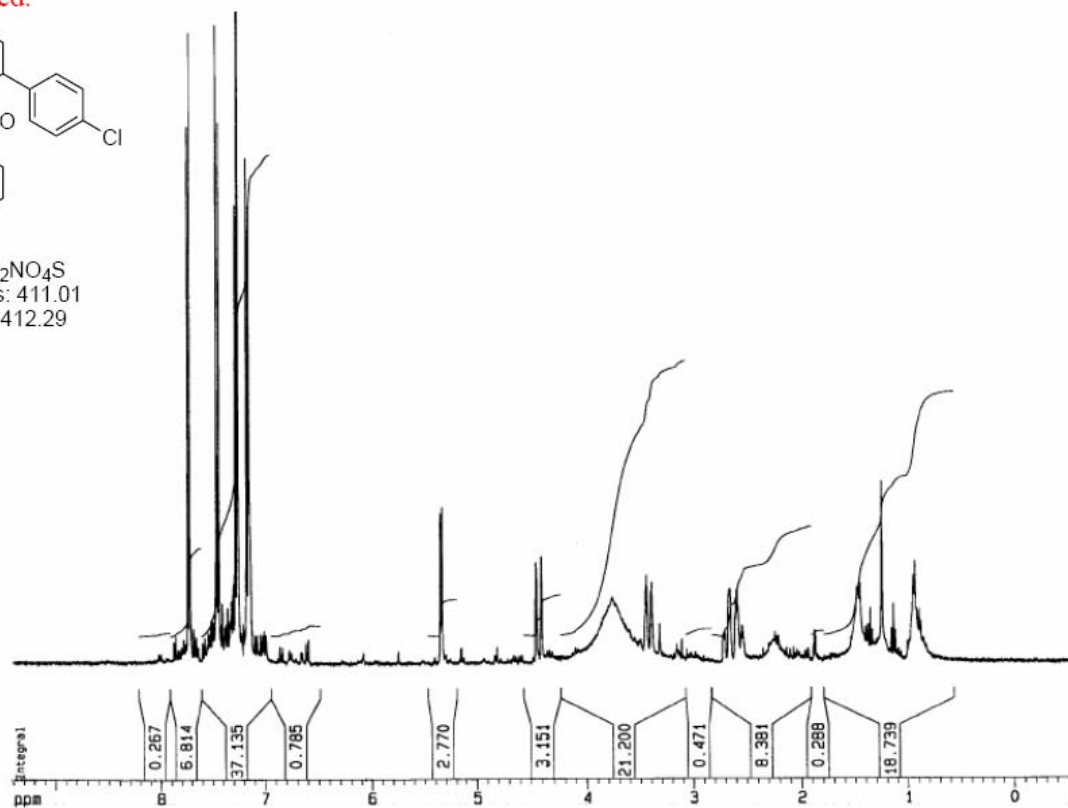

**6-(4-Chlorophenyl)-1-methanesulfonyl-1,2,5,6-tetrahydropyridine-3-carboxylic acid (B01C28)**

Not included.

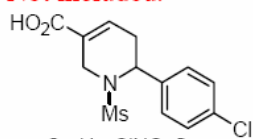

$C_{13}H_{14}ClNO_4S$   
Exact Mass: 315.03  
Mol. Wt.: 315.77

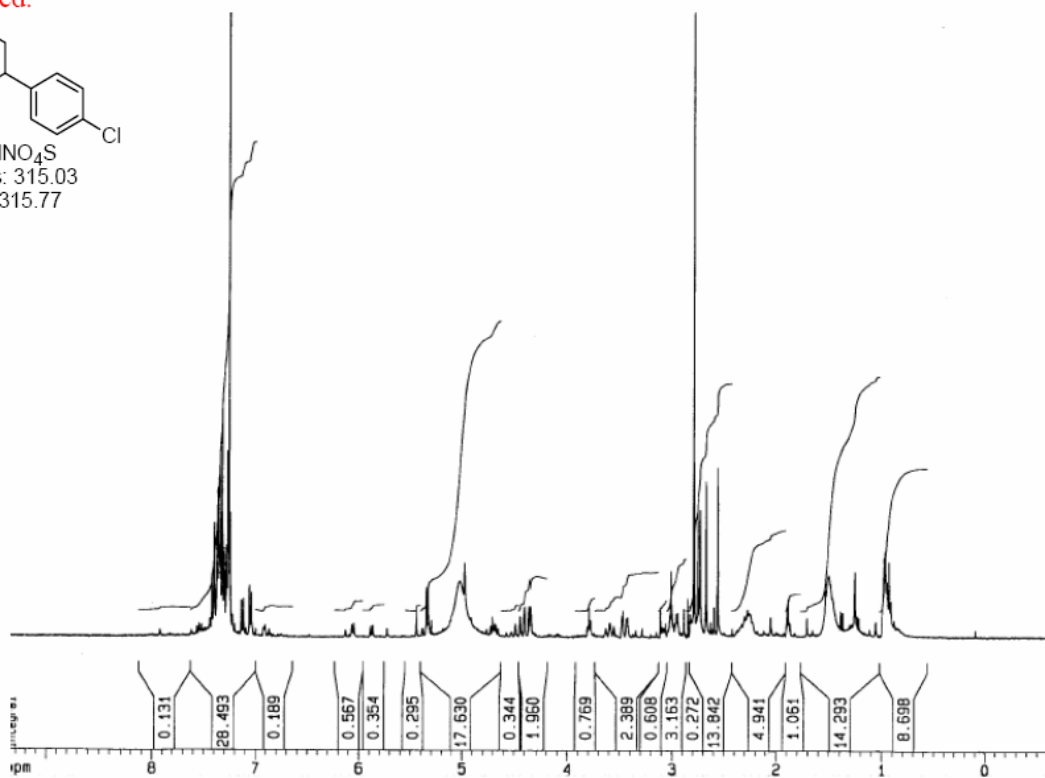

**Benzenesulfonyl-6-(4-chlorophenyl)-1,2,5,6-tetrahydropyridine-3-carboxylic acid (B01C29)**

Not included.

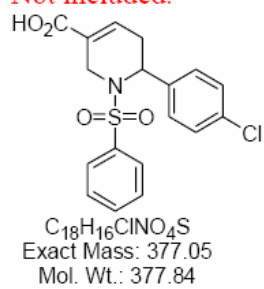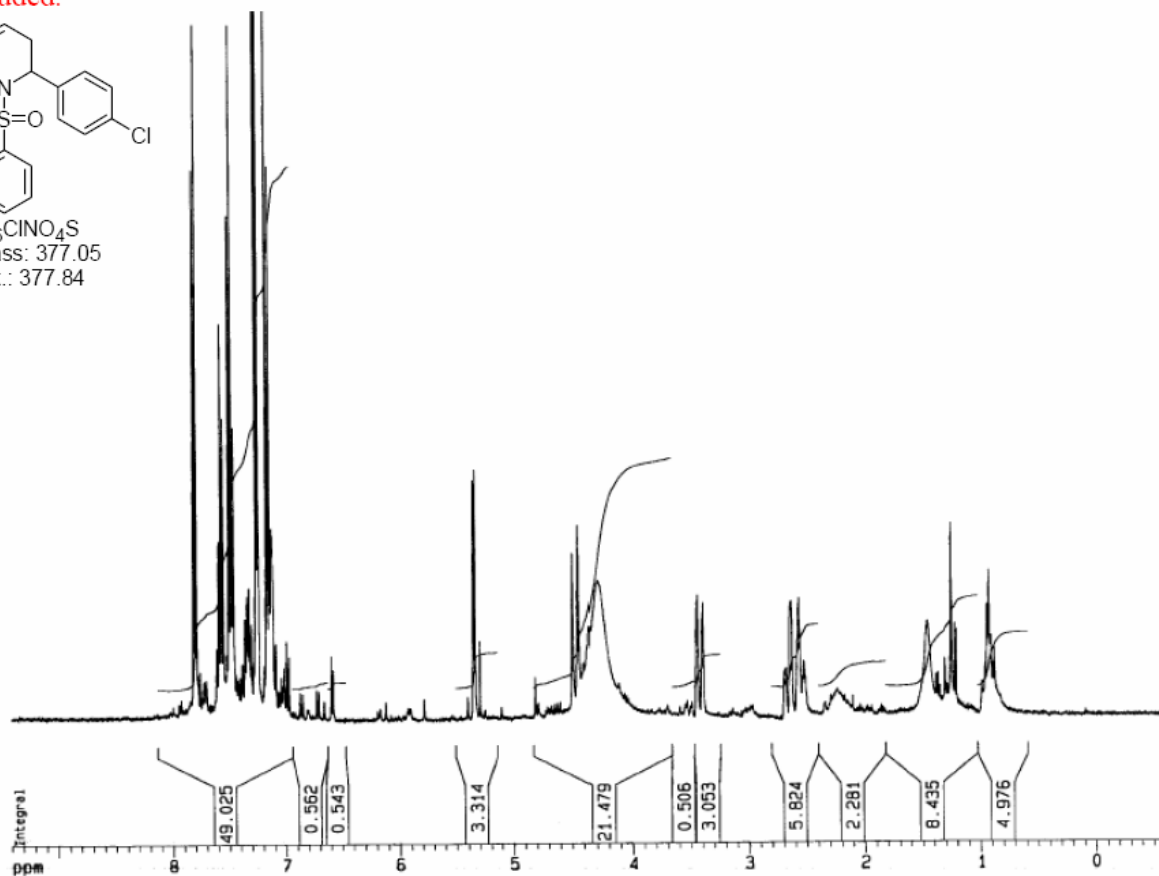



1-(4-Chlorobenzenesulfonyl)-6-(*p*-tolyl)-1,2,5,6-tetrahydropyridine-3-carboxylic acid (B01C30)

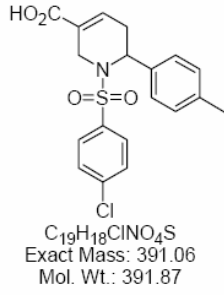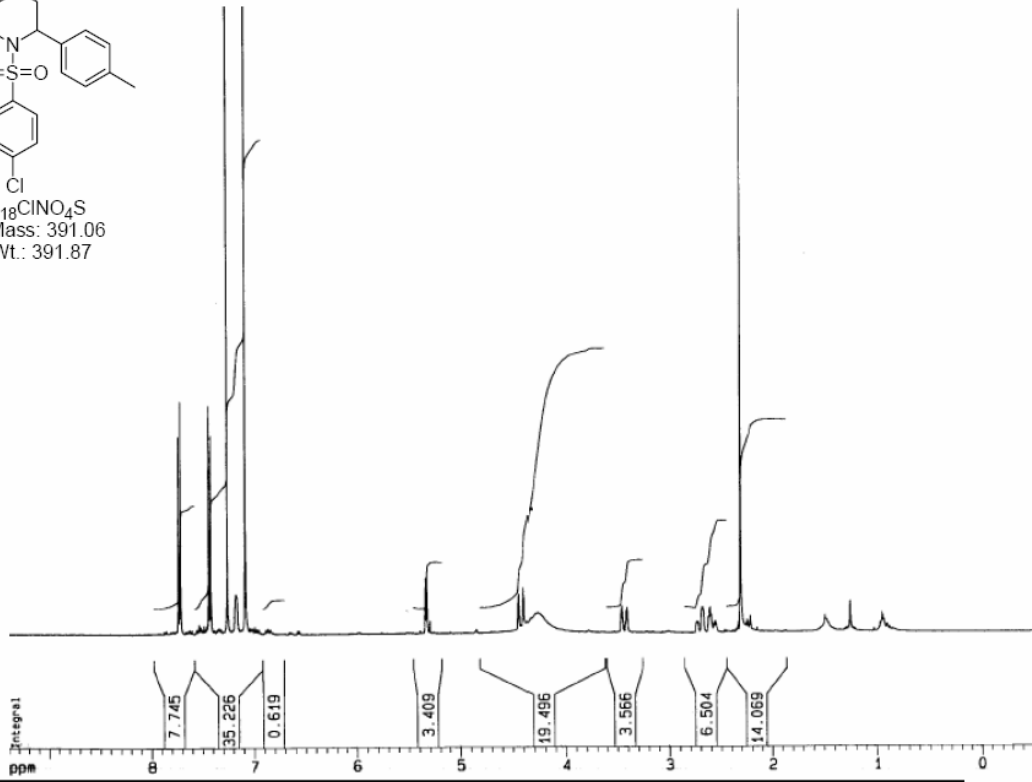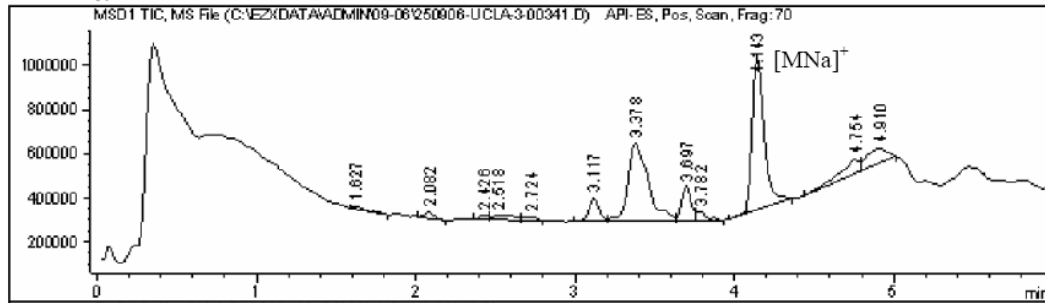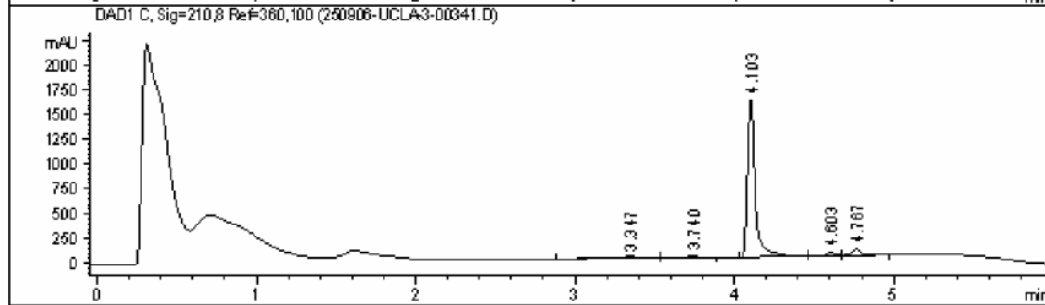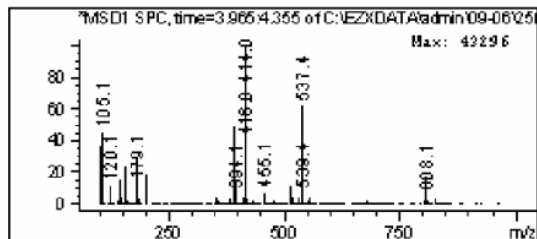

**6-(4-Chlorophenyl)-1-(2-methoxycarbonylbenzenesulfonyl)-1,2,5,6-tetrahydropyridine-3-carboxylic acid (B01C31)**

Not included

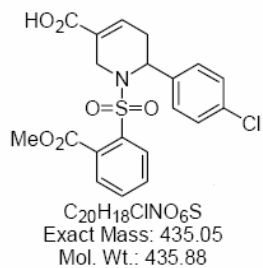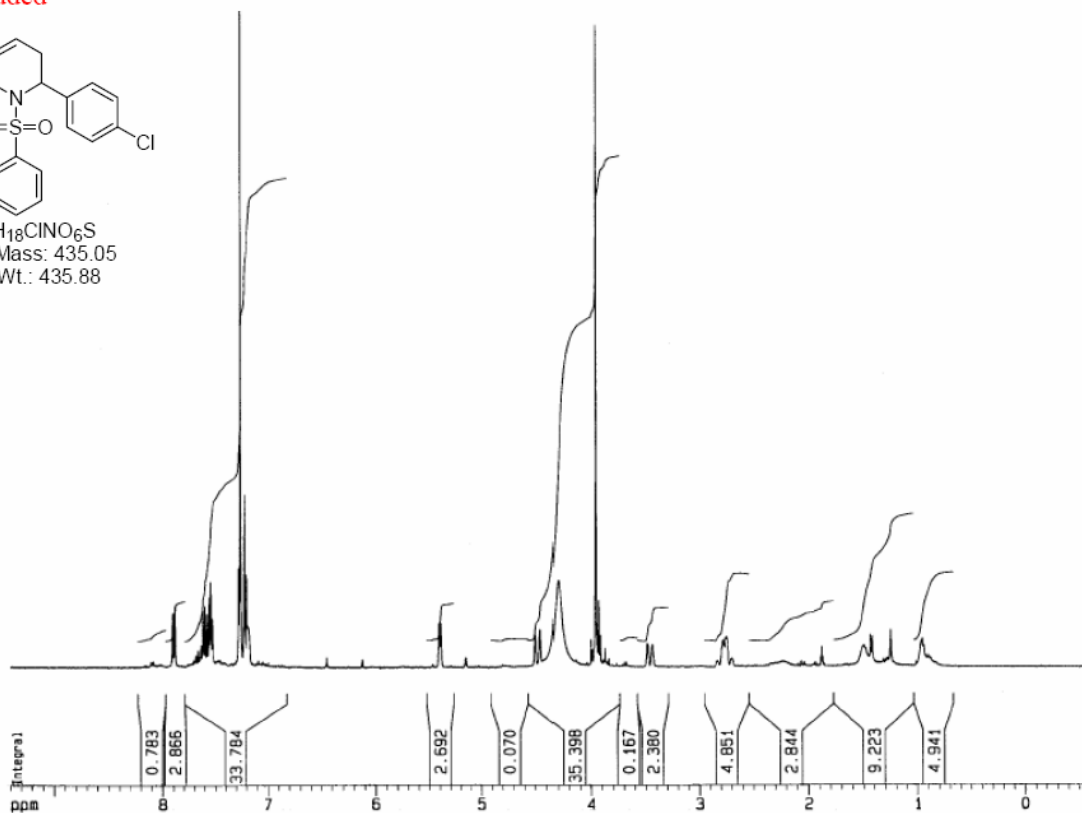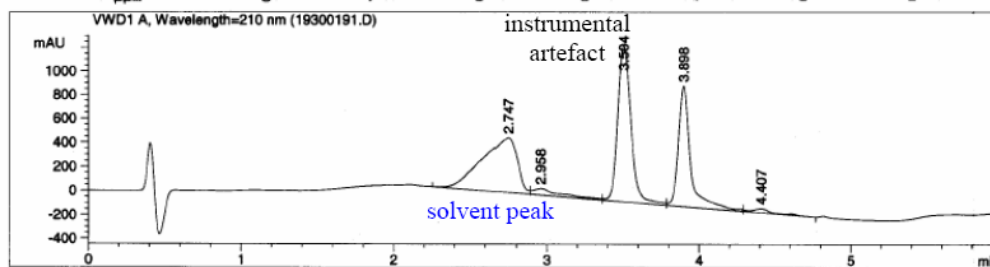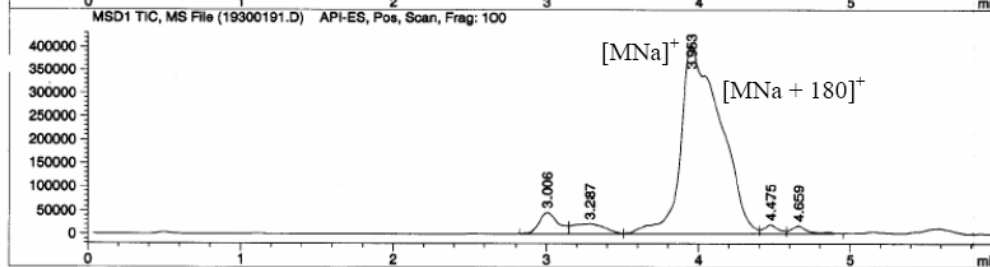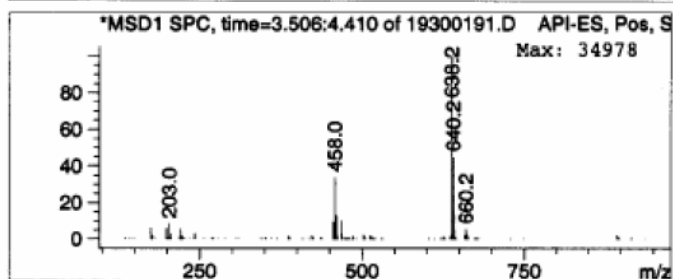

**6-(1-Methyl-1H-pyrrol-2-yl)-1-(4-toluenesulfonyl)-1,2,5,6-tetrahydropyridine-3-carboxylic acid (B01C32)**  
**Not included.**

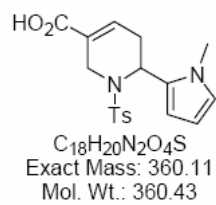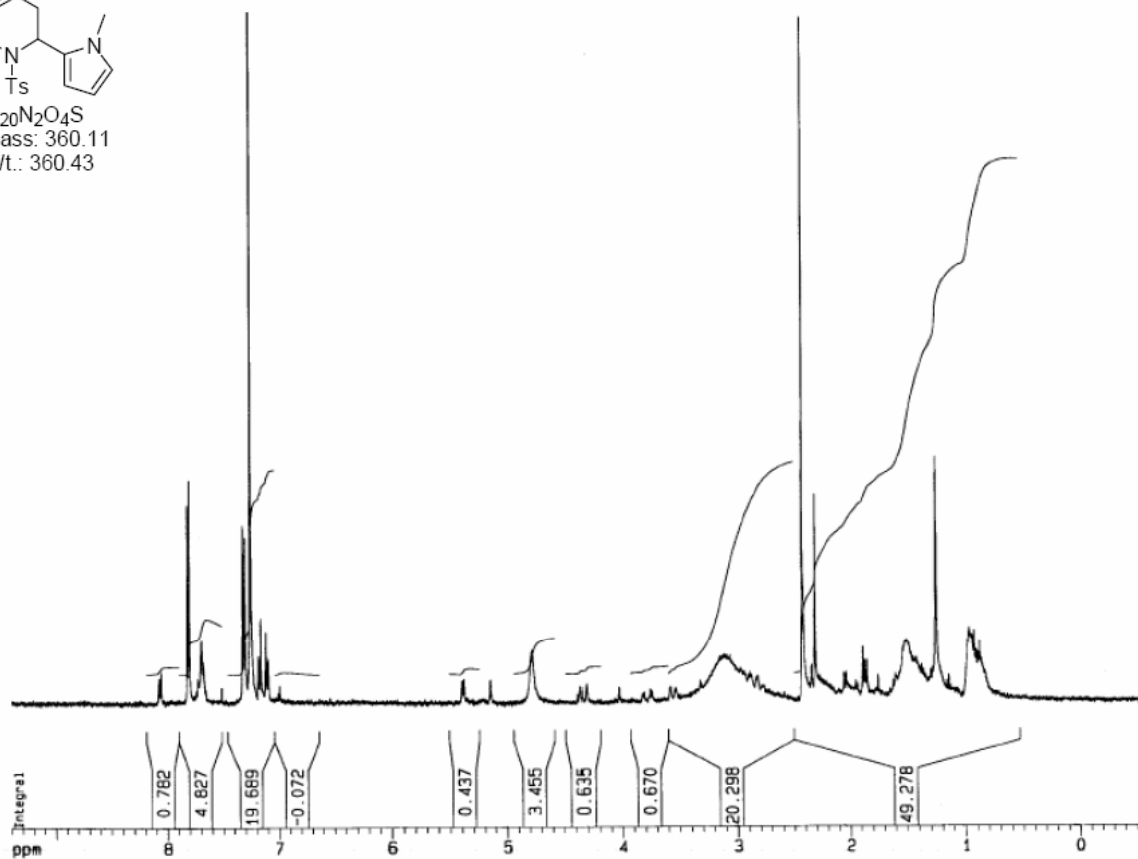

1-(4-Toluenesulfonyl)-6-(*m*-tolyl)-1,2,5,6-tetrahydropyridine-3-carboxylic acid (B01C33)

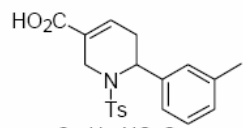

C<sub>20</sub>H<sub>21</sub>NO<sub>4</sub>S  
 Exact Mass: 371.12  
 Mol. Wt.: 371.45

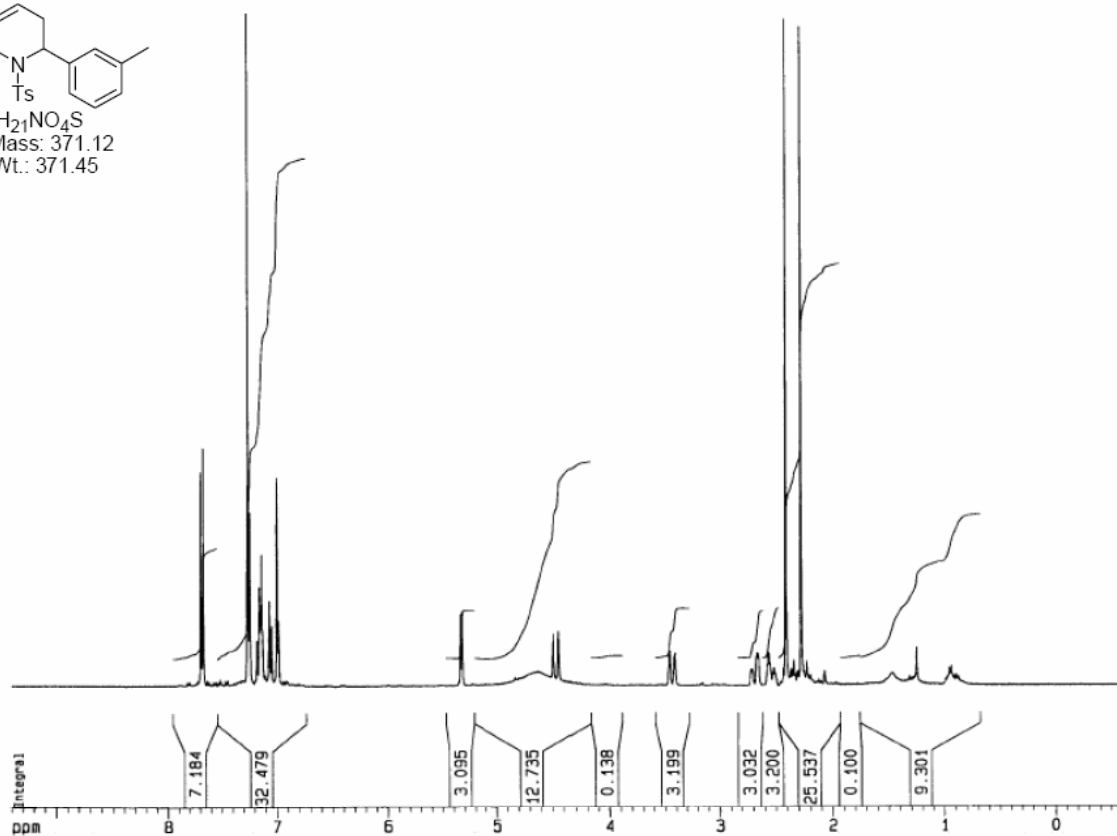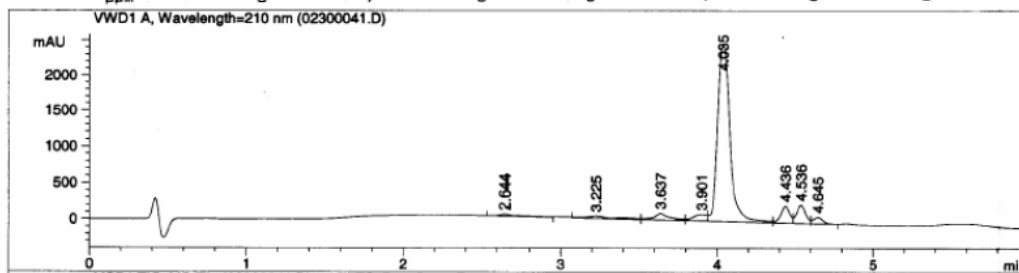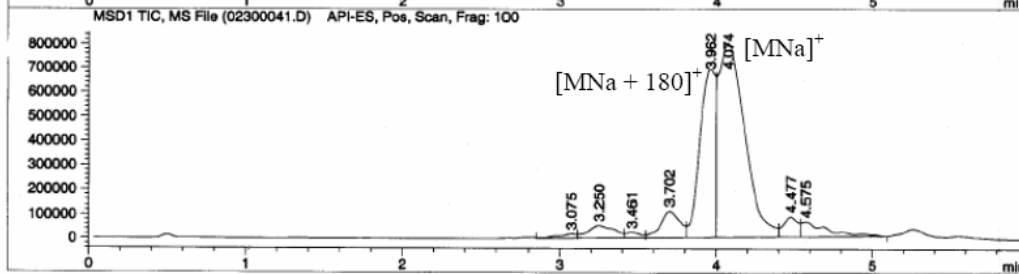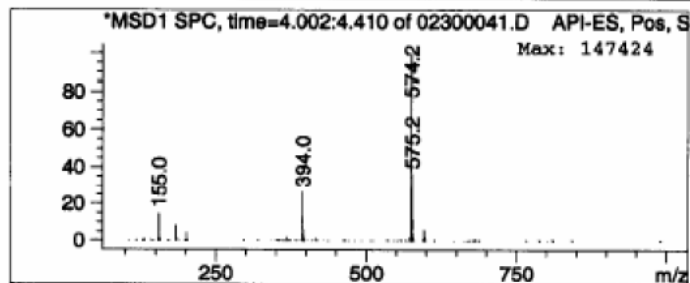

**1-(2-Methoxycarbonylbenzenesulfonyl)-6-(4-methoxyphenyl)-1,2,5,6-tetrahydropyridine-3-carboxylic acid (B01C34)**

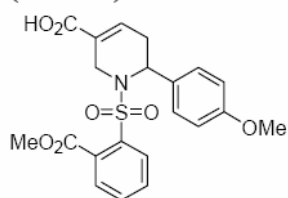

C<sub>21</sub>H<sub>21</sub>NO<sub>7</sub>S  
 Exact Mass: 431.10  
 Mol. Wt.: 431.46

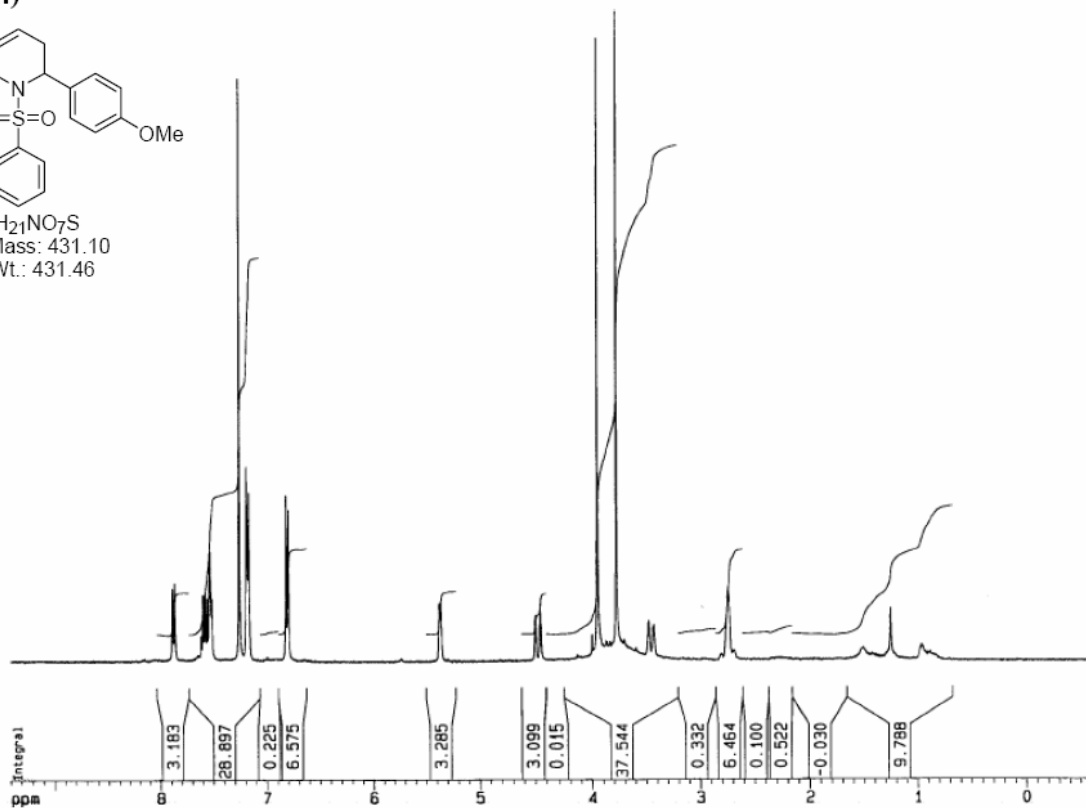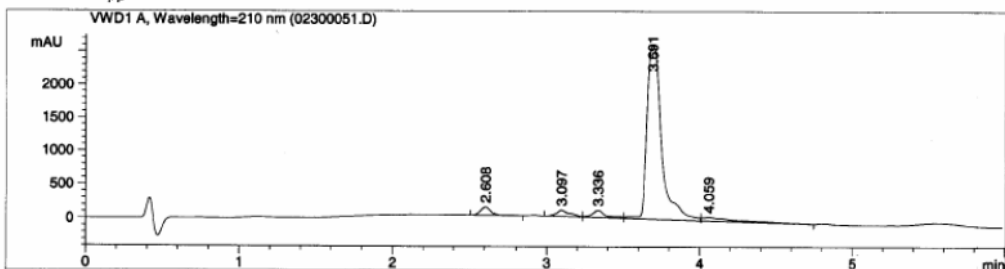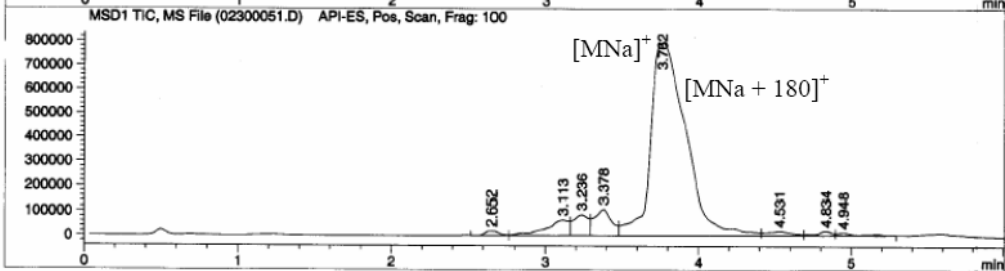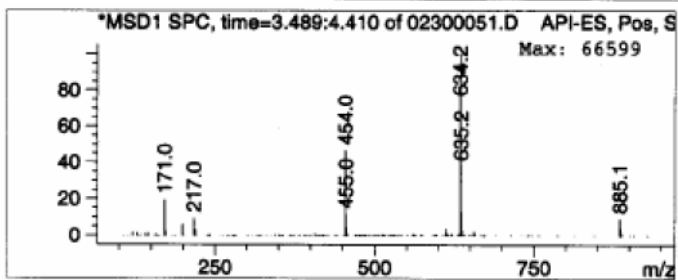

**Benzenesulfonyl-6-(4-methoxyphenyl)-1,2,5,6-tetrahydropyridine-3-carboxylic acid (B01C35)**

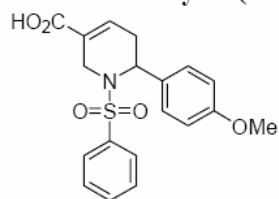

C<sub>19</sub>H<sub>19</sub>NO<sub>5</sub>S  
 Exact Mass: 373.10  
 Mol. Wt.: 373.42

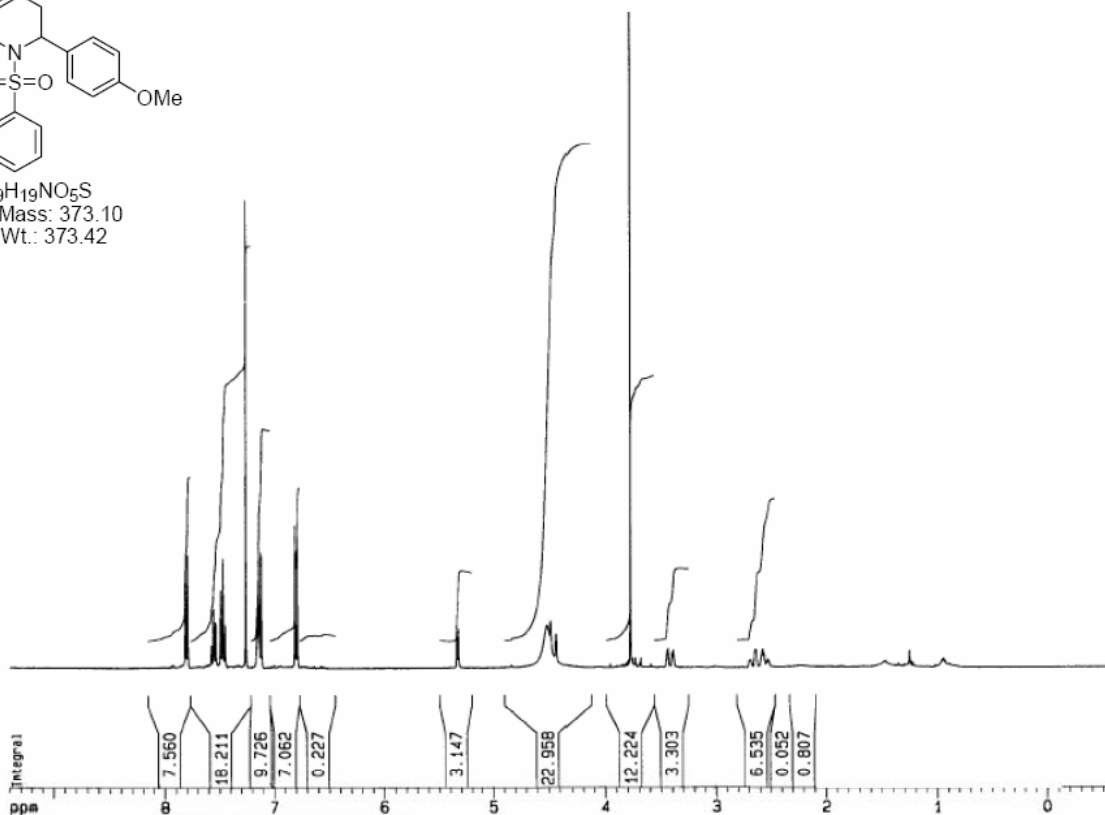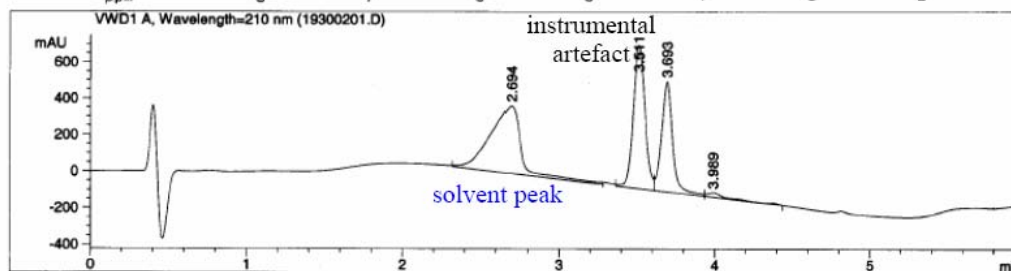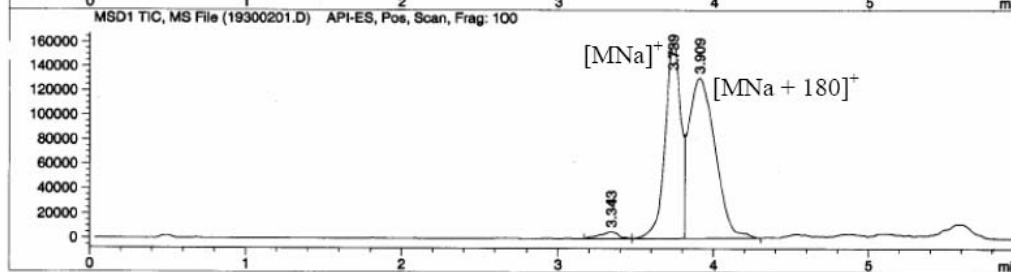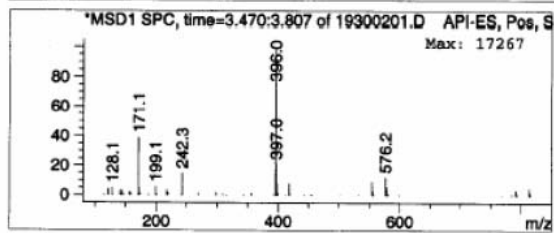

1-(2-Nitrobenzenesulfonyl)-6-(*p*-tolyl)-1,2,5,6-tetrahydropyridine-3-carboxylic acid (B01C36)

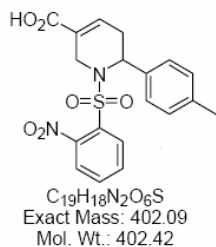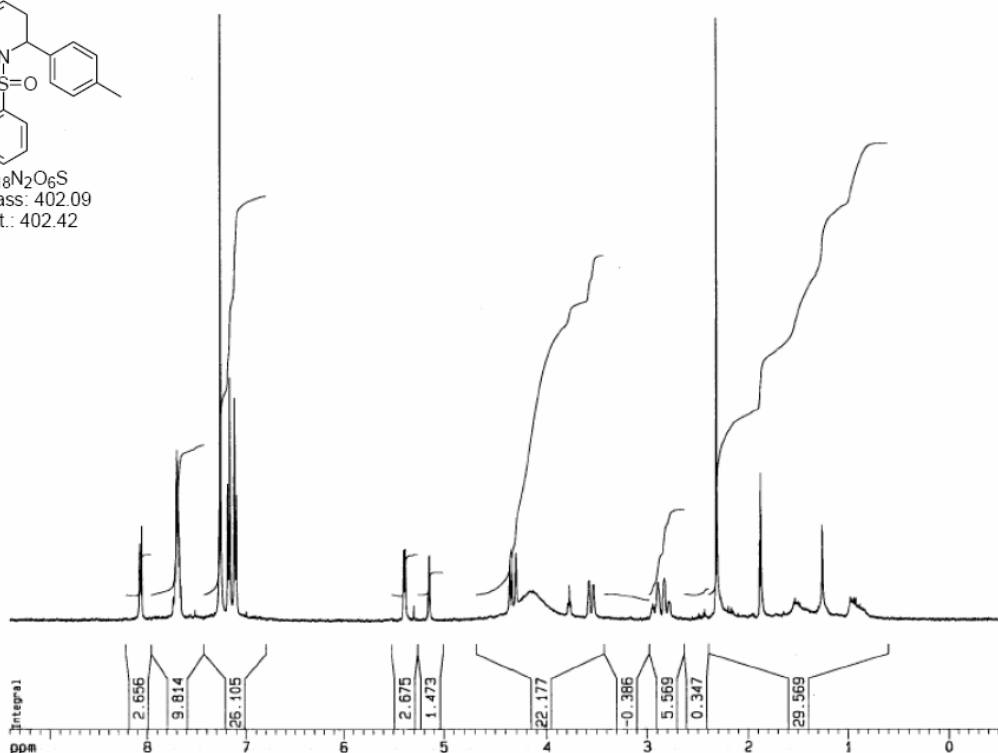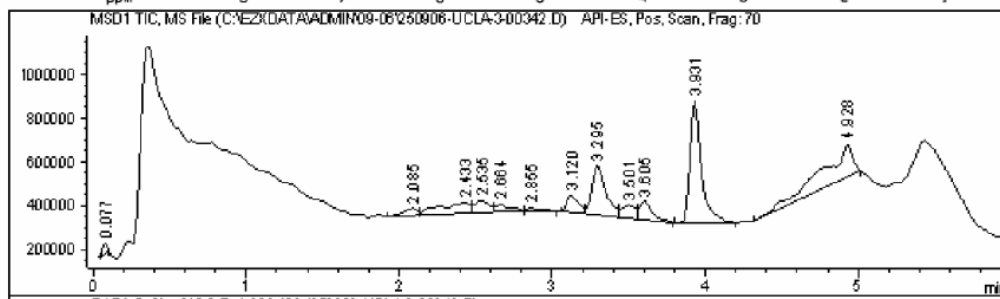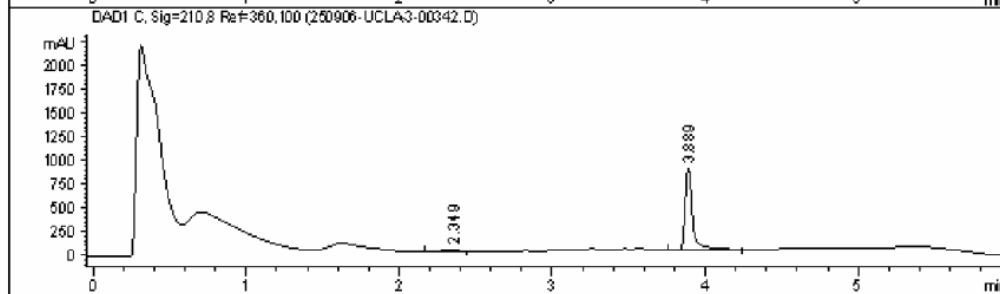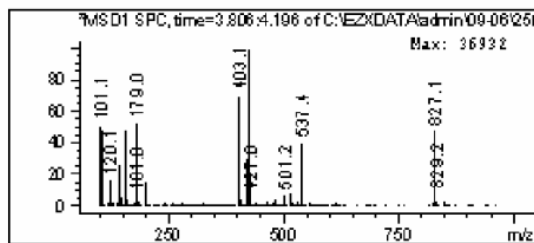

**1-(4-Chlorobenzenesulfonyl)-6-(4-methoxyphenyl)-1,2,5,6-tetrahydropyridine-3-carboxylic acid (B01C37)**

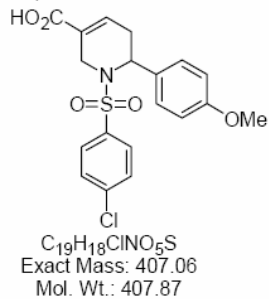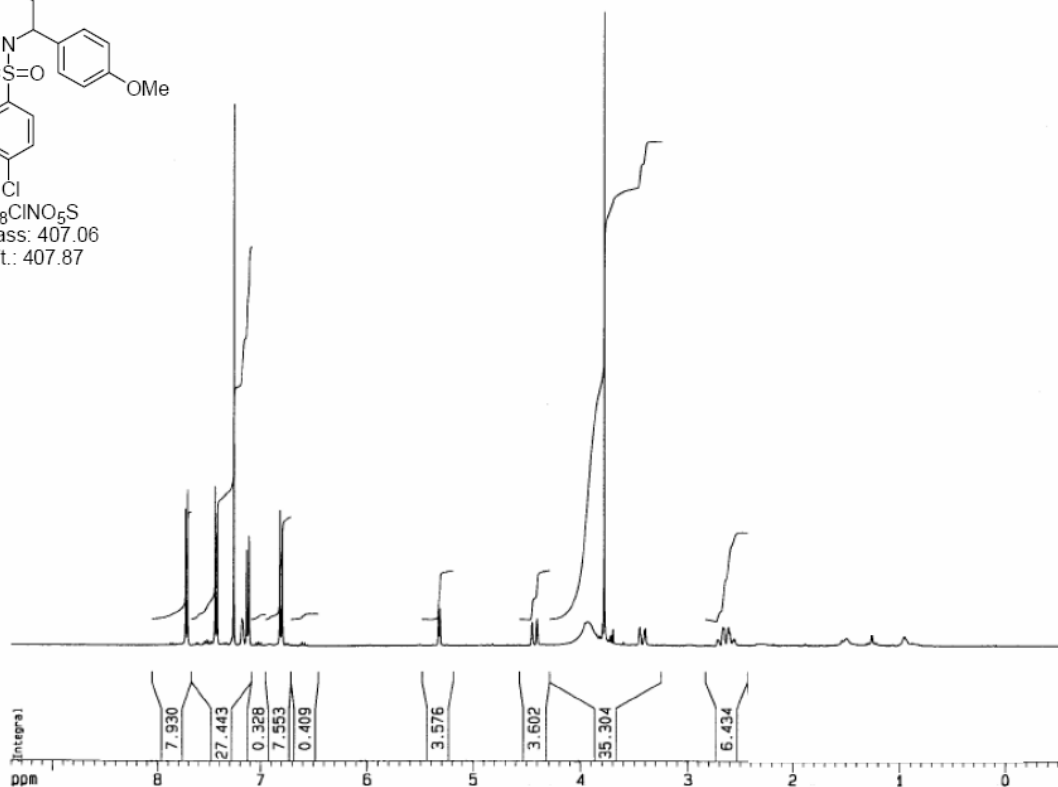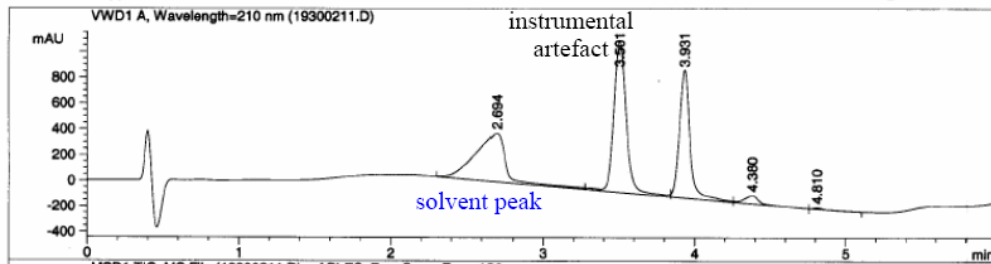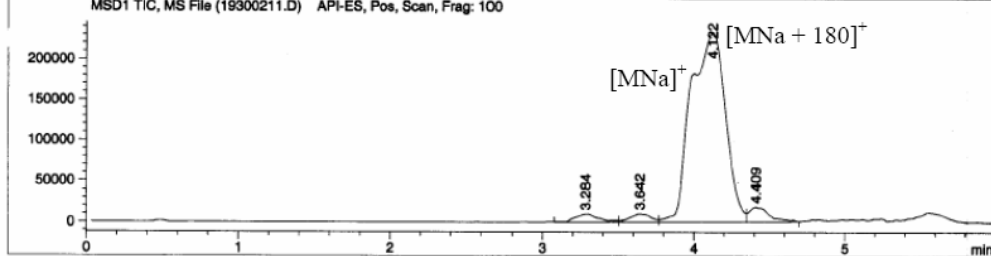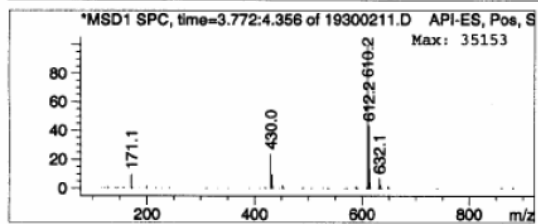



6-(4-Methoxyphenyl)-1-(2-toluenesulfonyl)-1,2,5,6-tetrahydropyridine-3-carboxylic acid (B01C38)

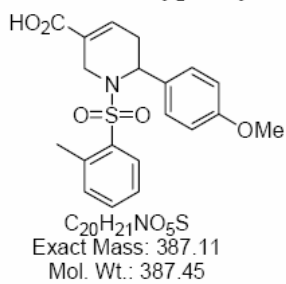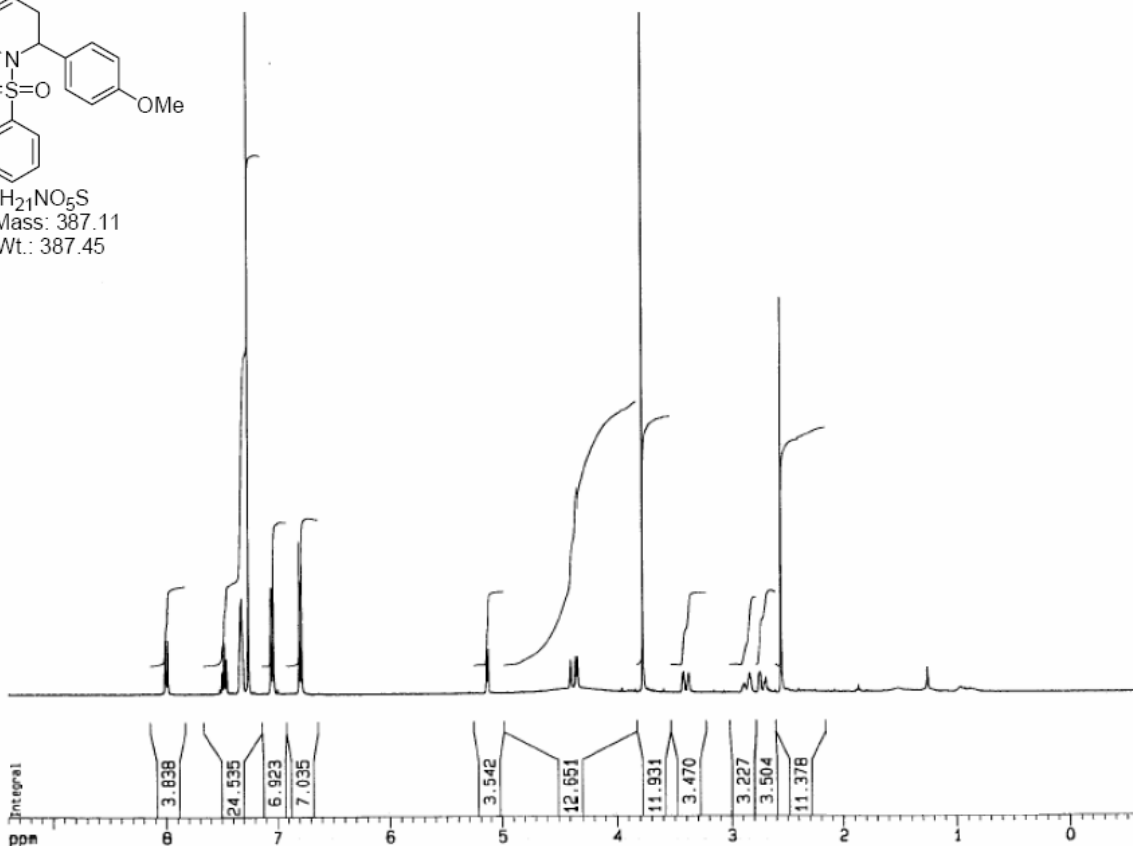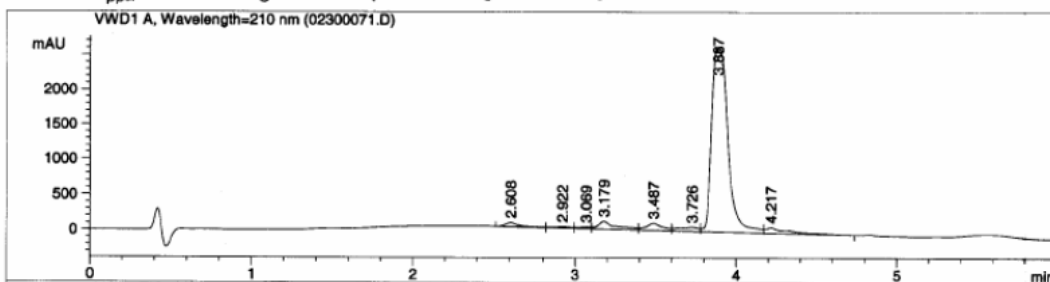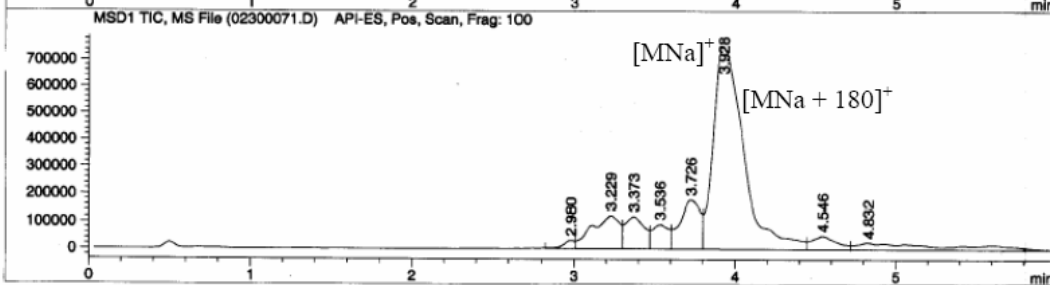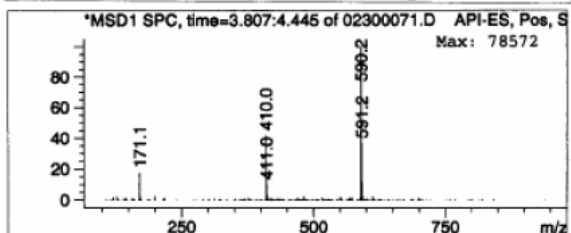

6-(3-Methoxyphenyl)-1-(4-toluenesulfonyl)-1,2,5,6-tetrahydropyridine-3-carboxylic acid (B01C39)

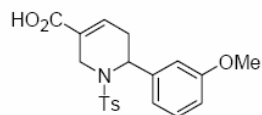

C<sub>20</sub>H<sub>21</sub>NO<sub>5</sub>S  
 Exact Mass: 387.11  
 Mol. Wt.: 387.45

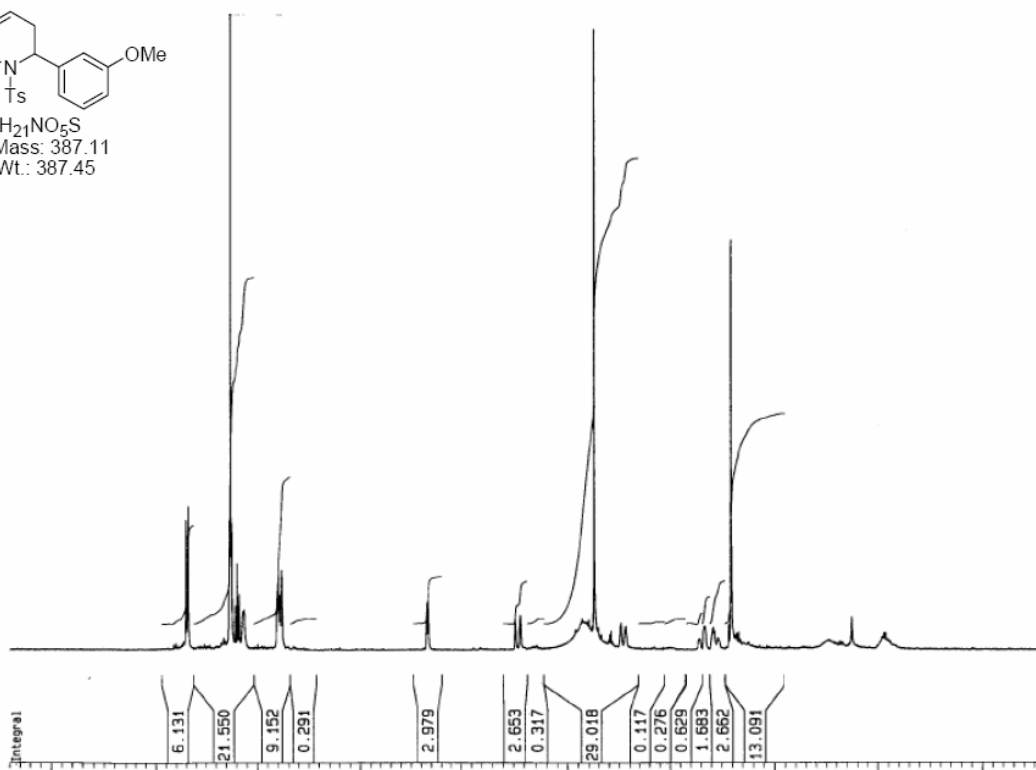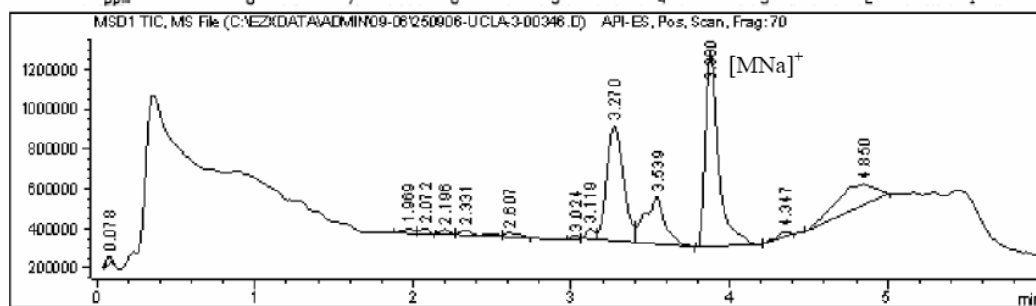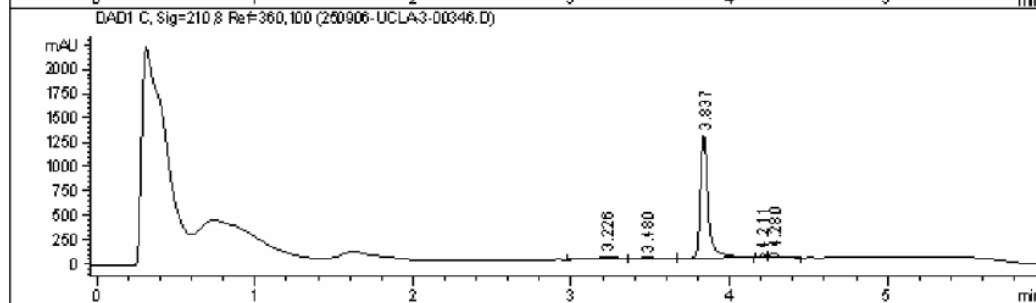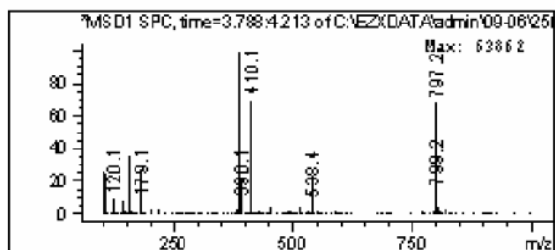

# 6-(4-Chlorophenyl)-1-(2-toluenesulfonyl)-1,2,5,6-tetrahydropyridine-3-carboxylic acid (B01C40)

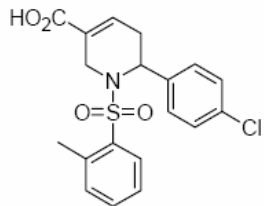

C<sub>19</sub>H<sub>18</sub>ClNO<sub>4</sub>S  
Exact Mass: 391.06  
Mol. Wt.: 391.87

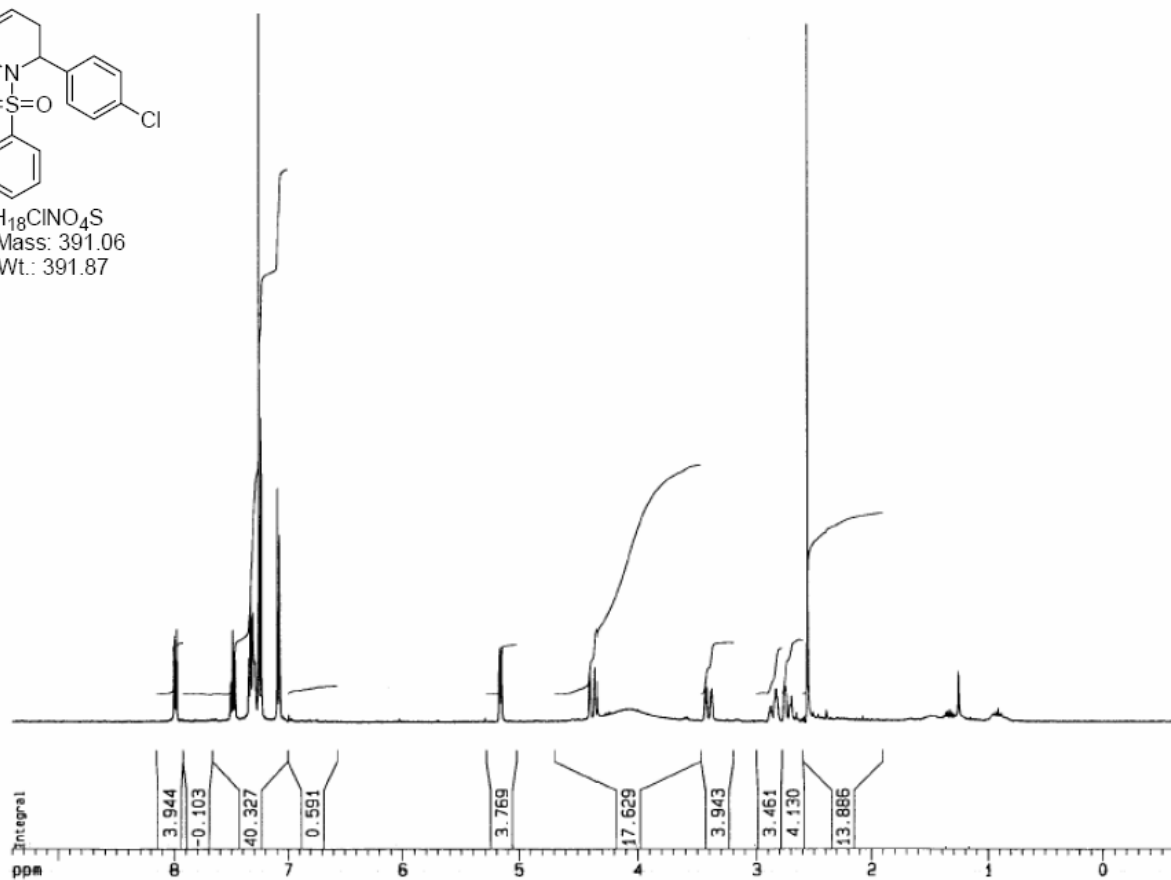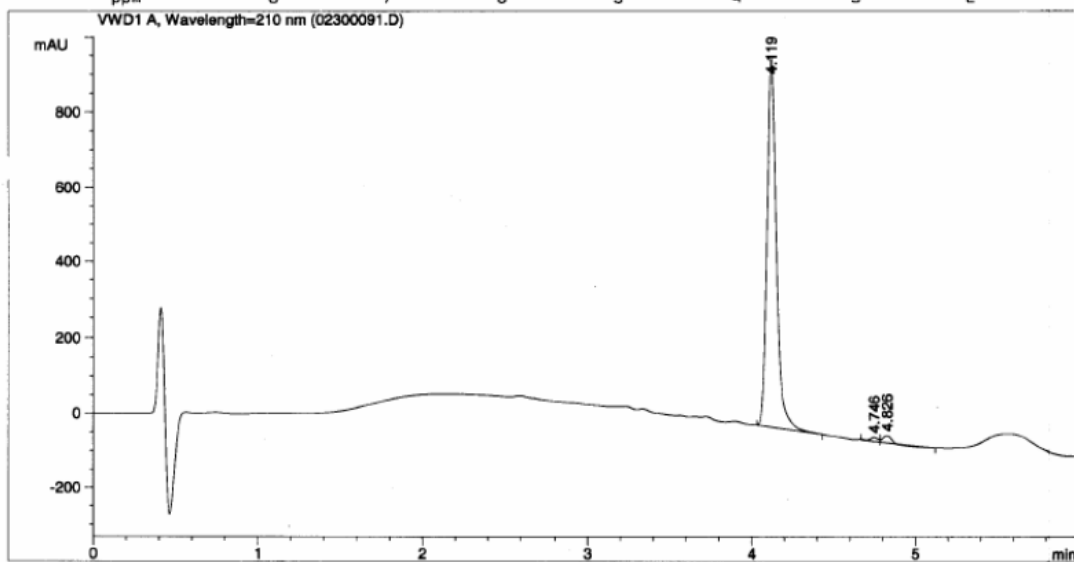

1-(2-Toluenesulfonyl)-6-(*p*-tolyl)-1,2,5,6-tetrahydropyridine-3-carboxylic acid (B01C41)

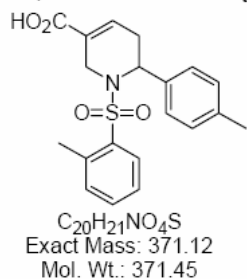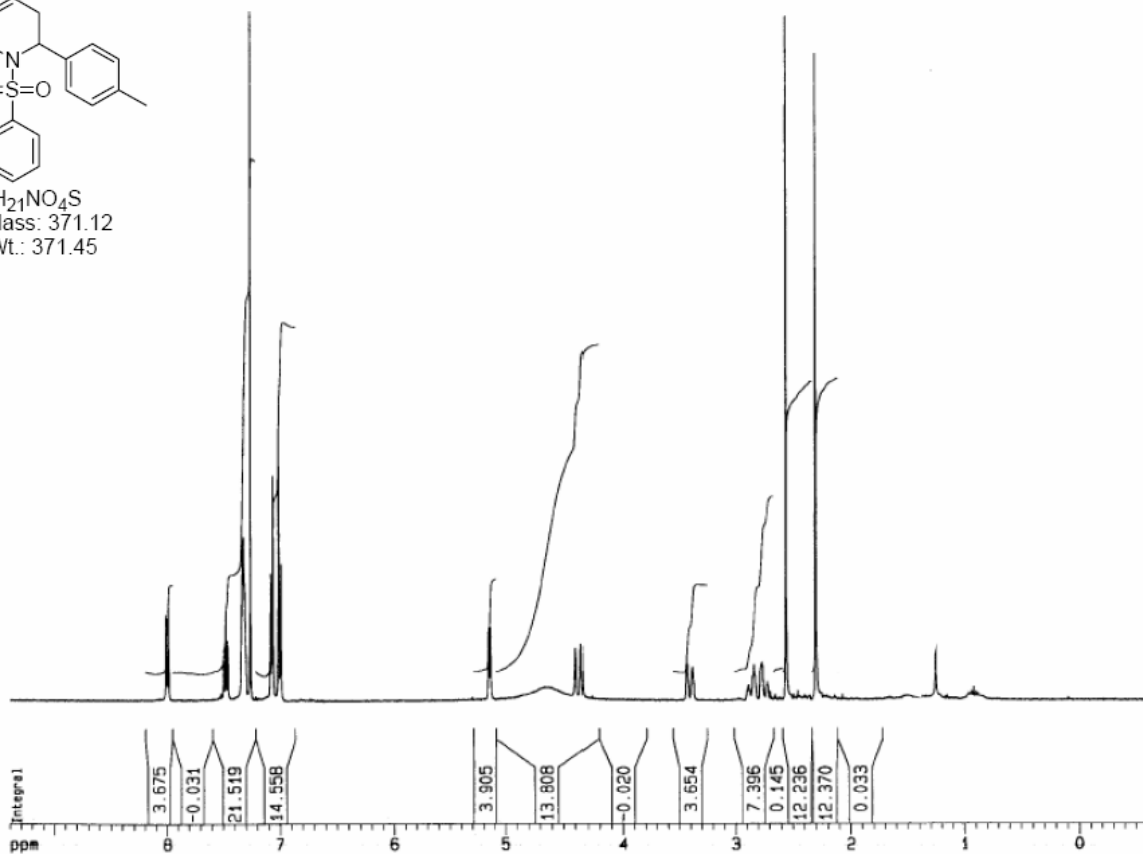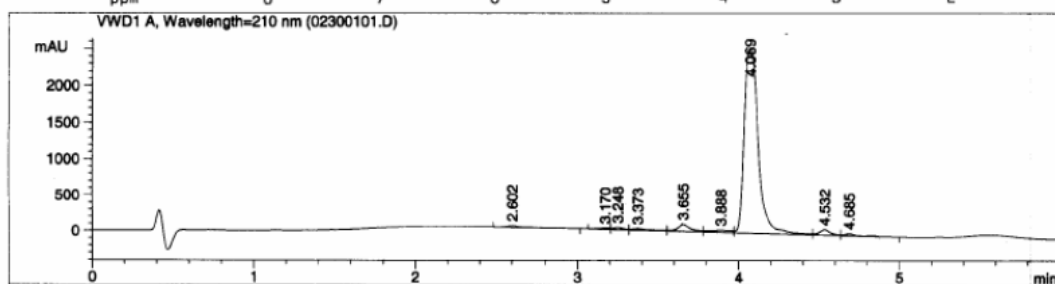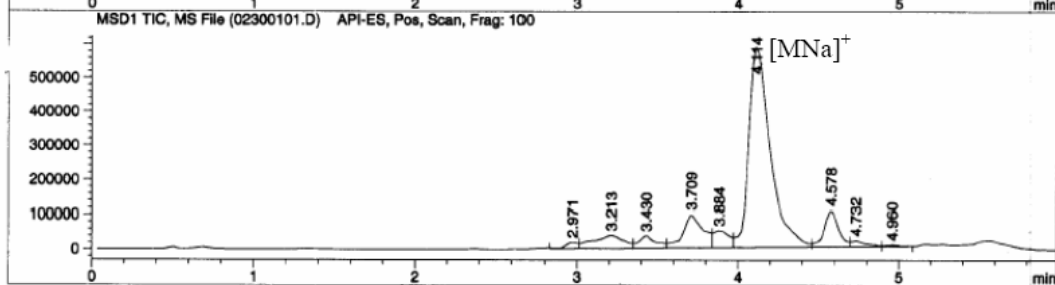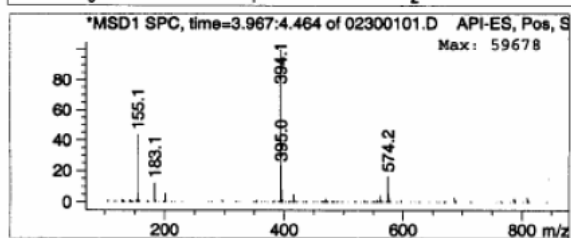

**1-(2-Methoxycarbonylbenzenesulfonyl)-6-(*p*-tolyl)-1,2,5,6-tetrahydropyridine-3-carboxylic acid (B01C42)**

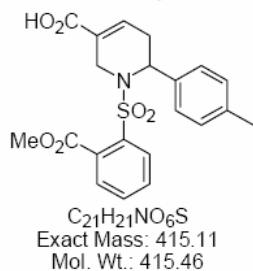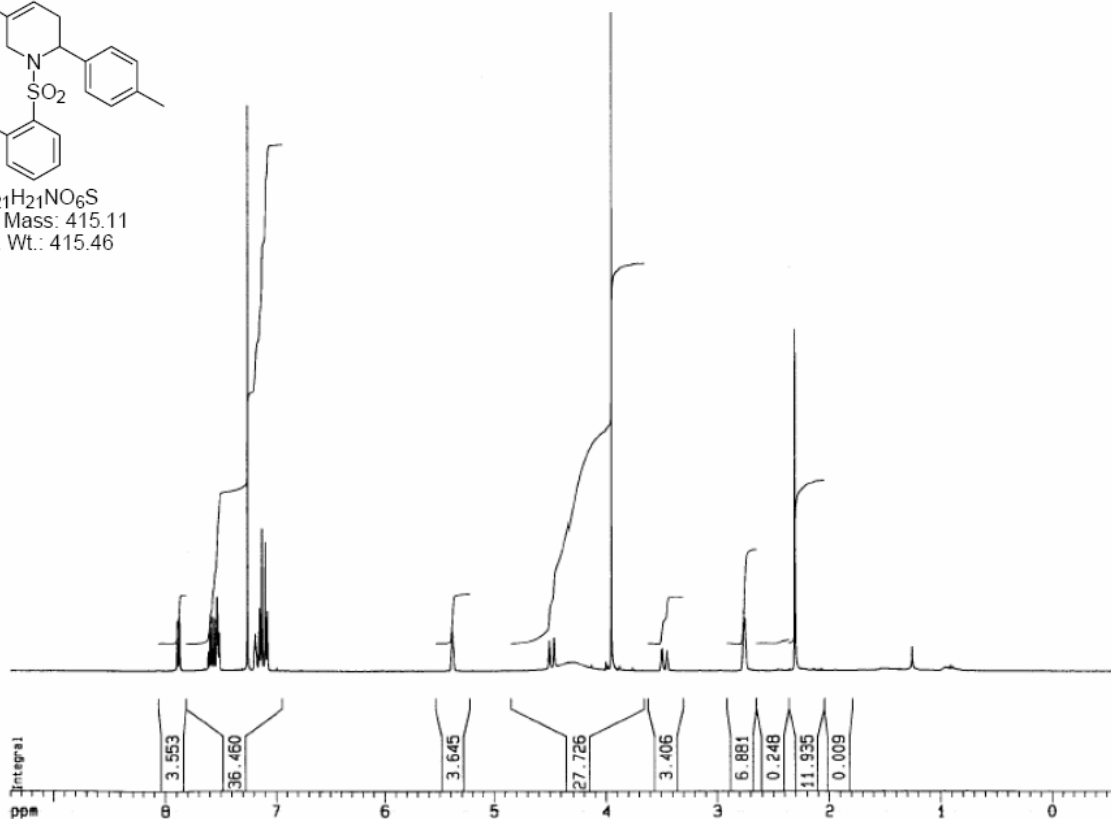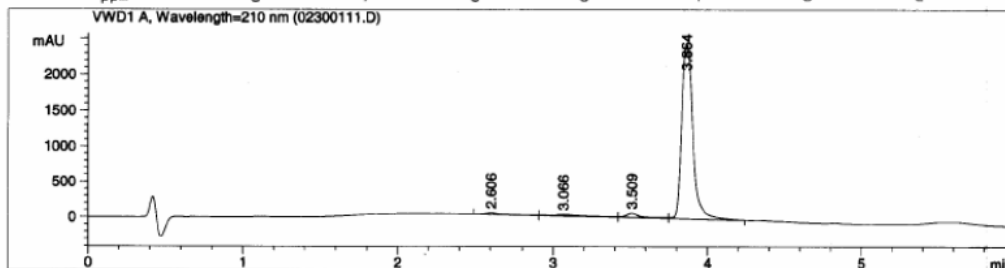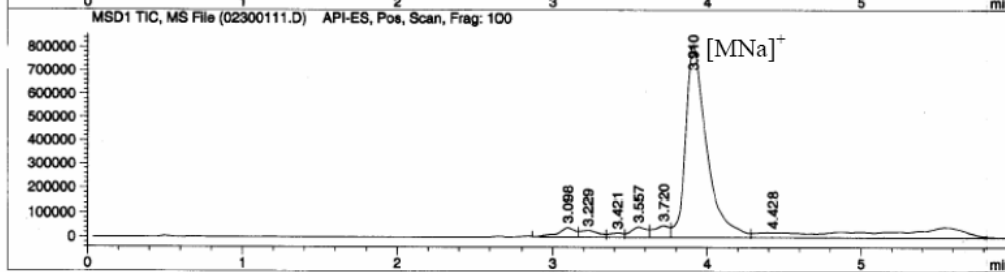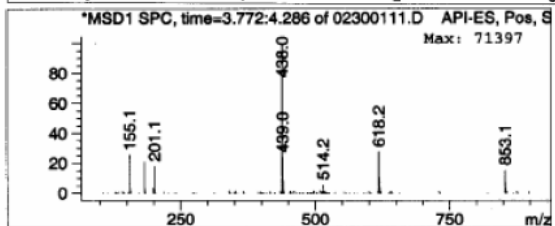

1-Benzenesulfonyl-6-(*p*-tolyl)-1,2,5,6-tetrahydropyridine-3-carboxylic acid (B01C43)

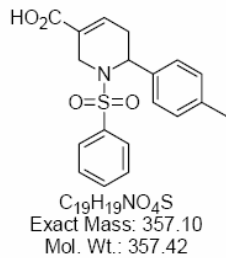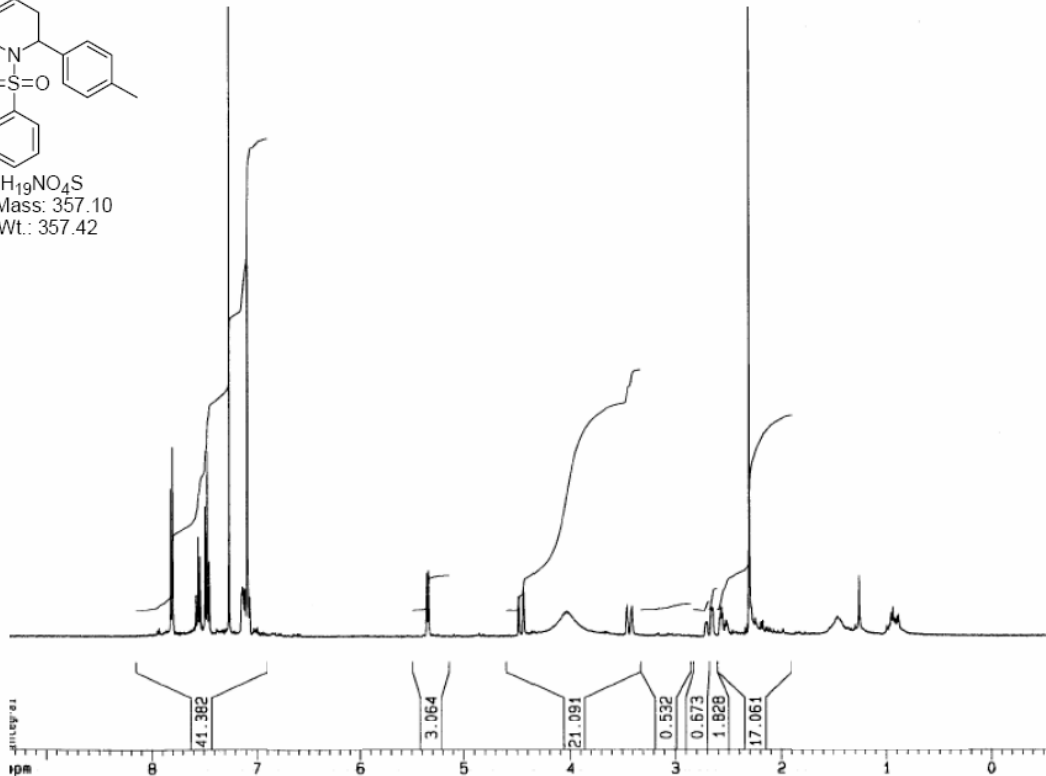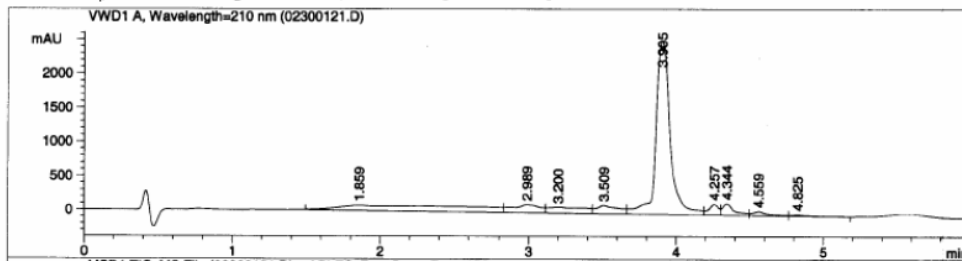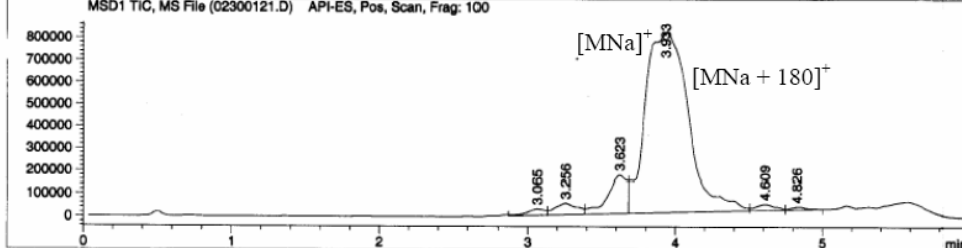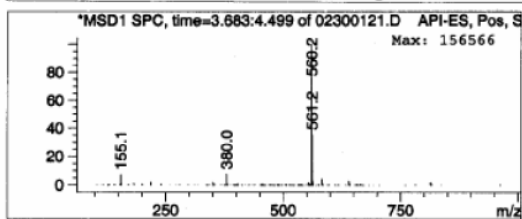

1-(4-Nitrobenzenesulfonyl)-6-(*p*-tolyl)-1,2,5,6-tetrahydropyridine-3-carboxylic acid (B01C44)

Not included.

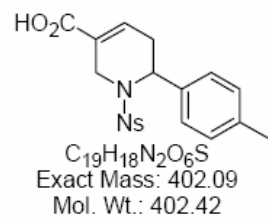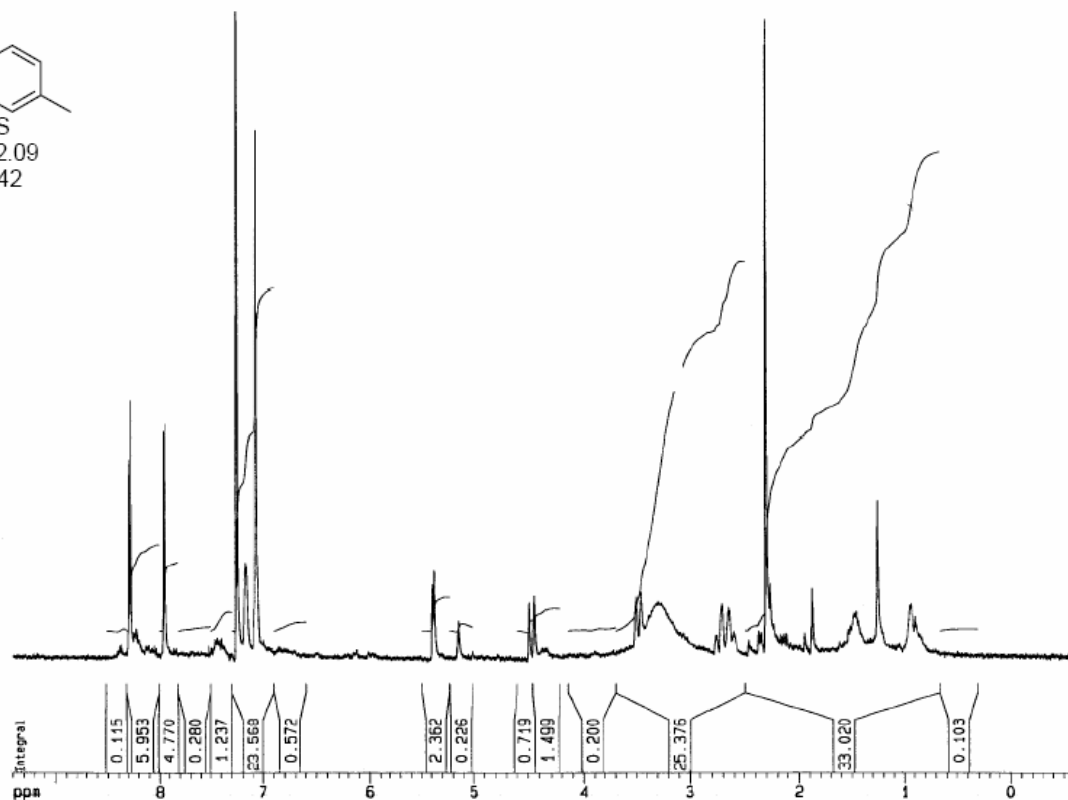

**1-(3-Nitrobenzenesulfonyl)-6-(*p*-tolyl)-1,2,5,6-tetrahydropyridine-3-carboxylic acid (B01C45)**

Not included.

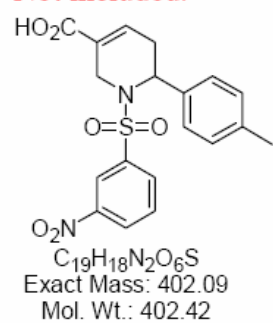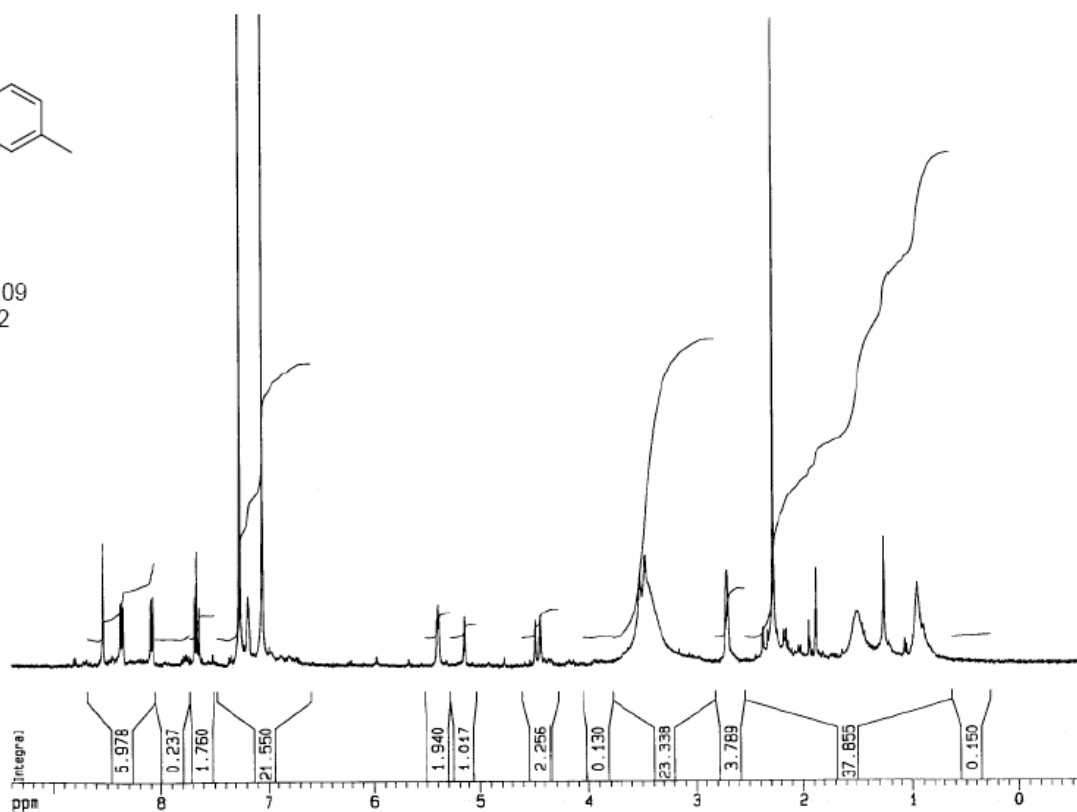



1-Methanesulfonyl-6-(*p*-tolyl)-1,2,5,6-tetrahydropyridine-3-carboxylic acid (B01C46)

Not included.

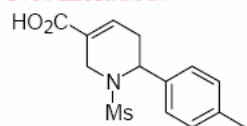

C<sub>14</sub>H<sub>17</sub>NO<sub>4</sub>S  
Exact Mass: 295.09  
Mol. Wt.: 295.35

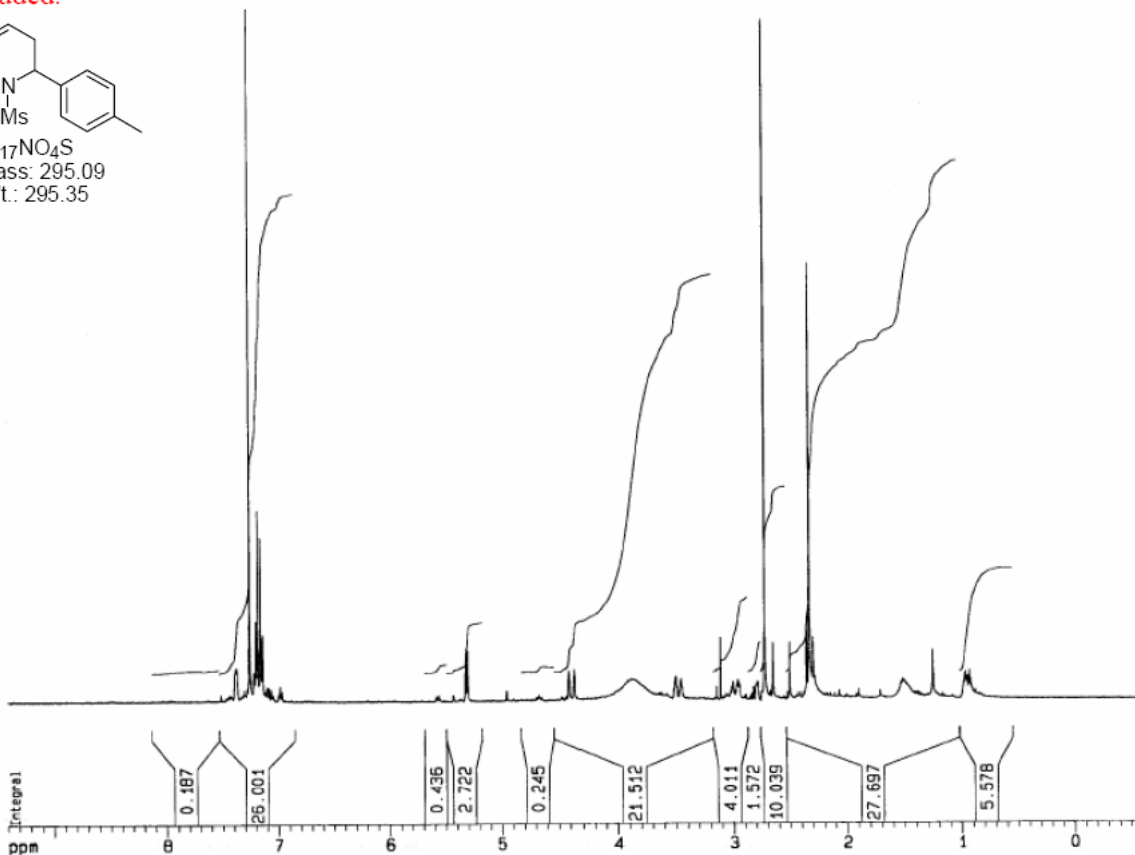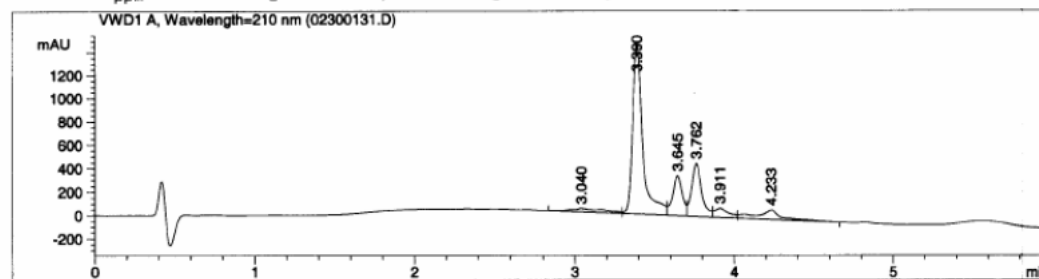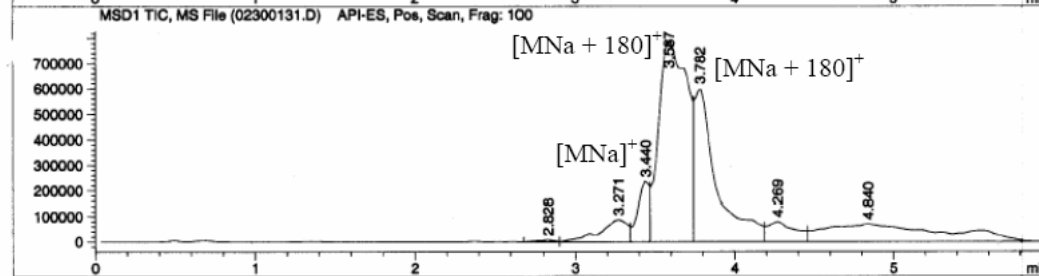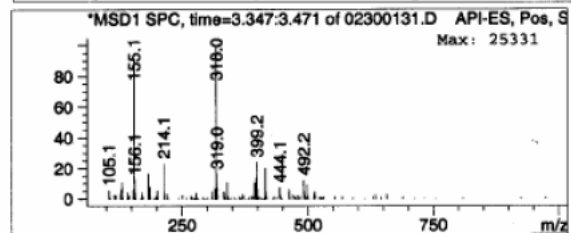

## Spectral data for Table 7

### 2-Phenyl-1-(4-toluenesulfonyl)-6-(*p*-tolyl)-1,2,5,6-tetrahydropyridine-3-carboxylic acid (B02C02)

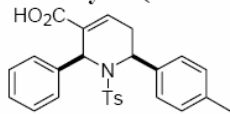

C<sub>26</sub>H<sub>25</sub>NO<sub>4</sub>S  
 Exact Mass: 447.15  
 Mol. Wt.: 447.55

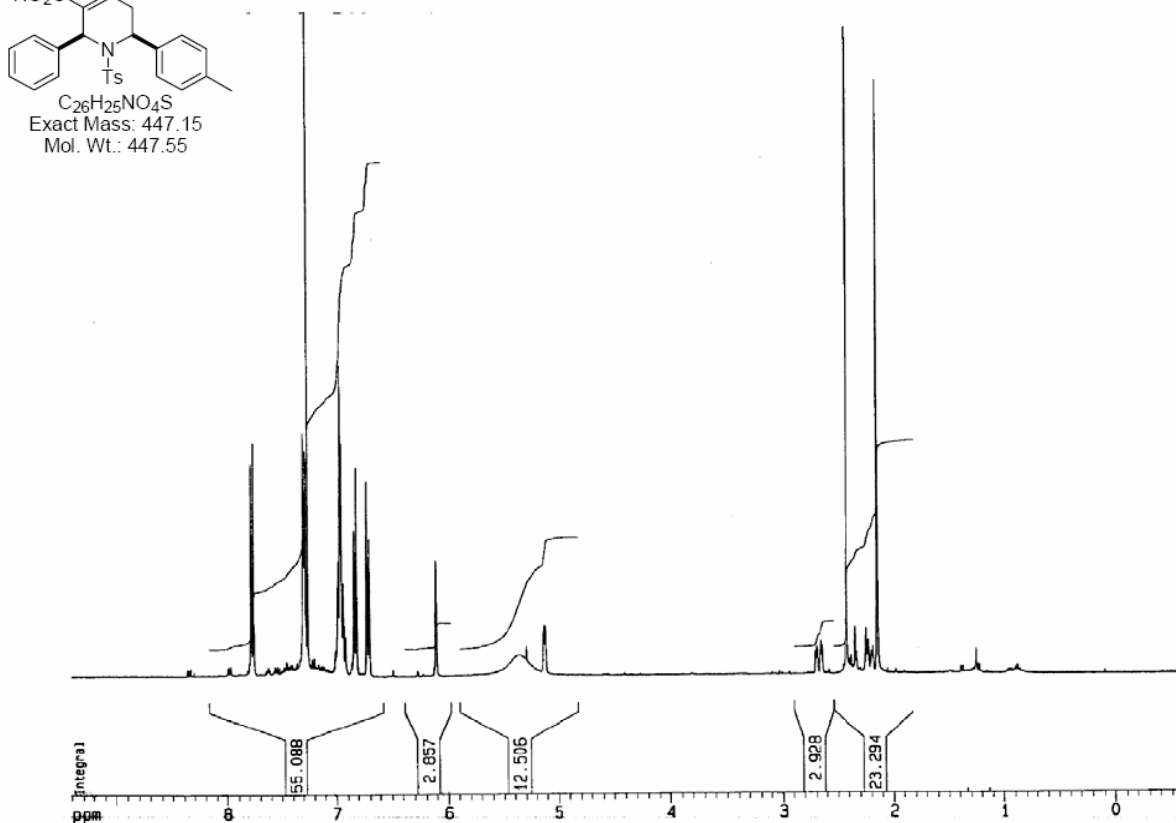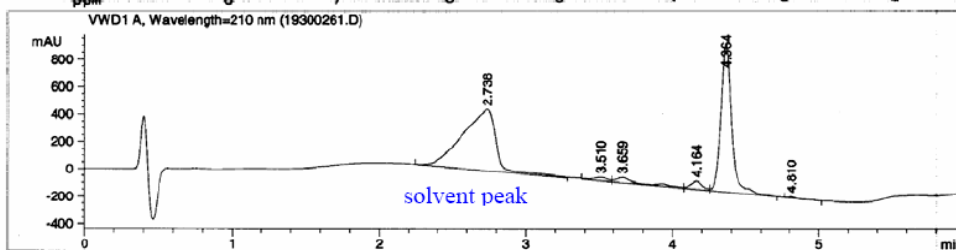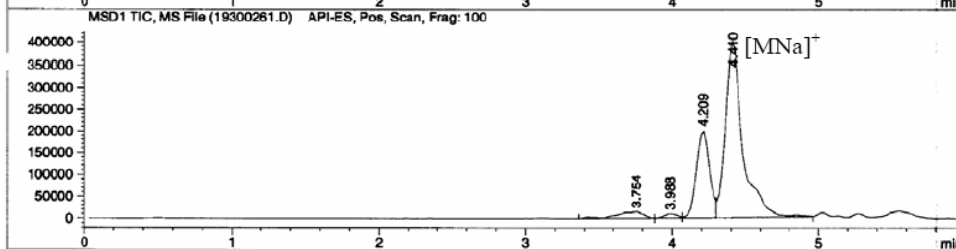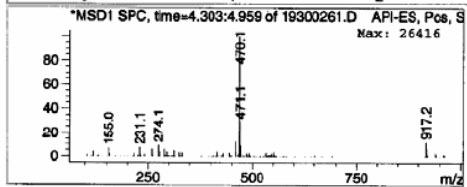

2-(2-Fluorophenyl)-1-(4-toluenesulfonyl)-6-(*p*-tolyl)-1,2,5,6-tetrahydropyridine-3-carboxylic acid (B03C02)

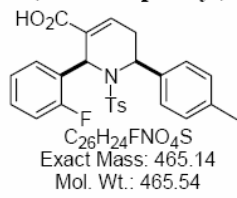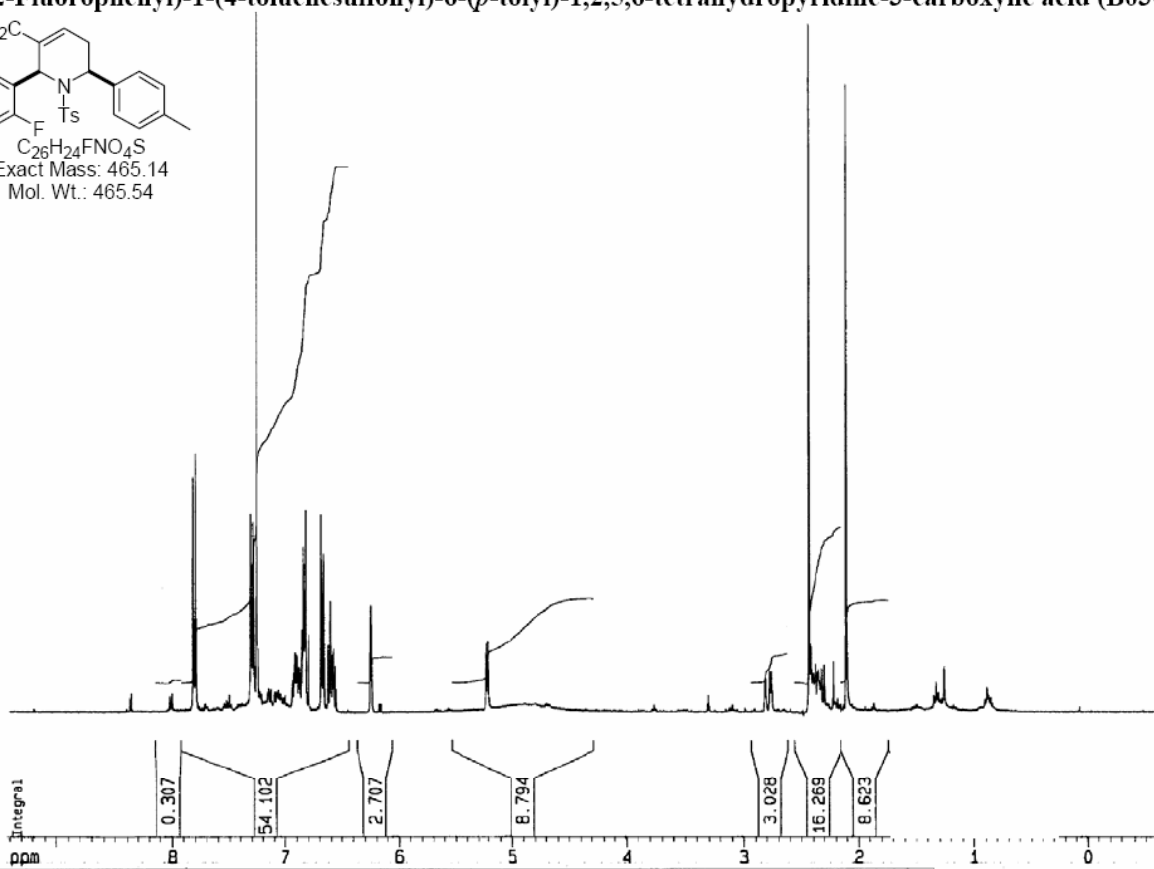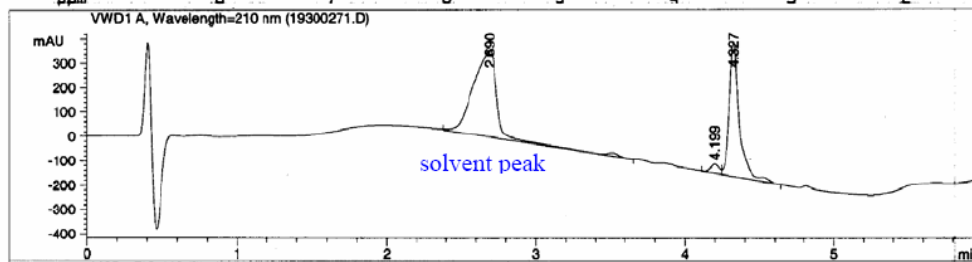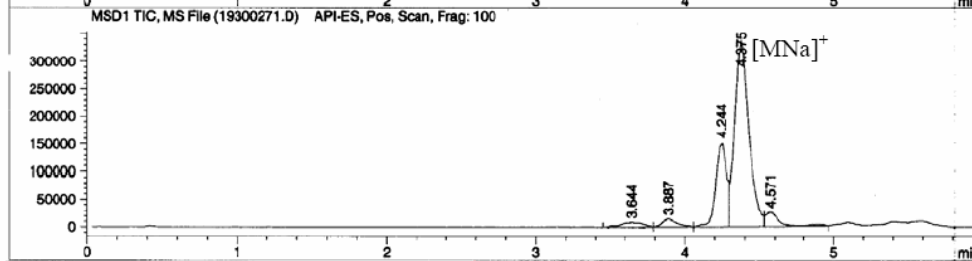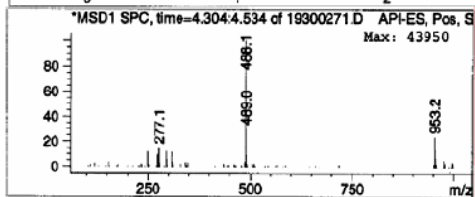

2-(3-Fluorophenyl)-1-(4-toluenesulfonyl)-6-(*p*-tolyl)-1,2,5,6-tetrahydropyridine-3-carboxylic acid (B04C02)

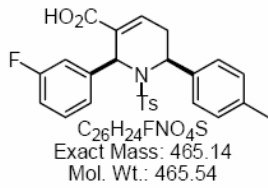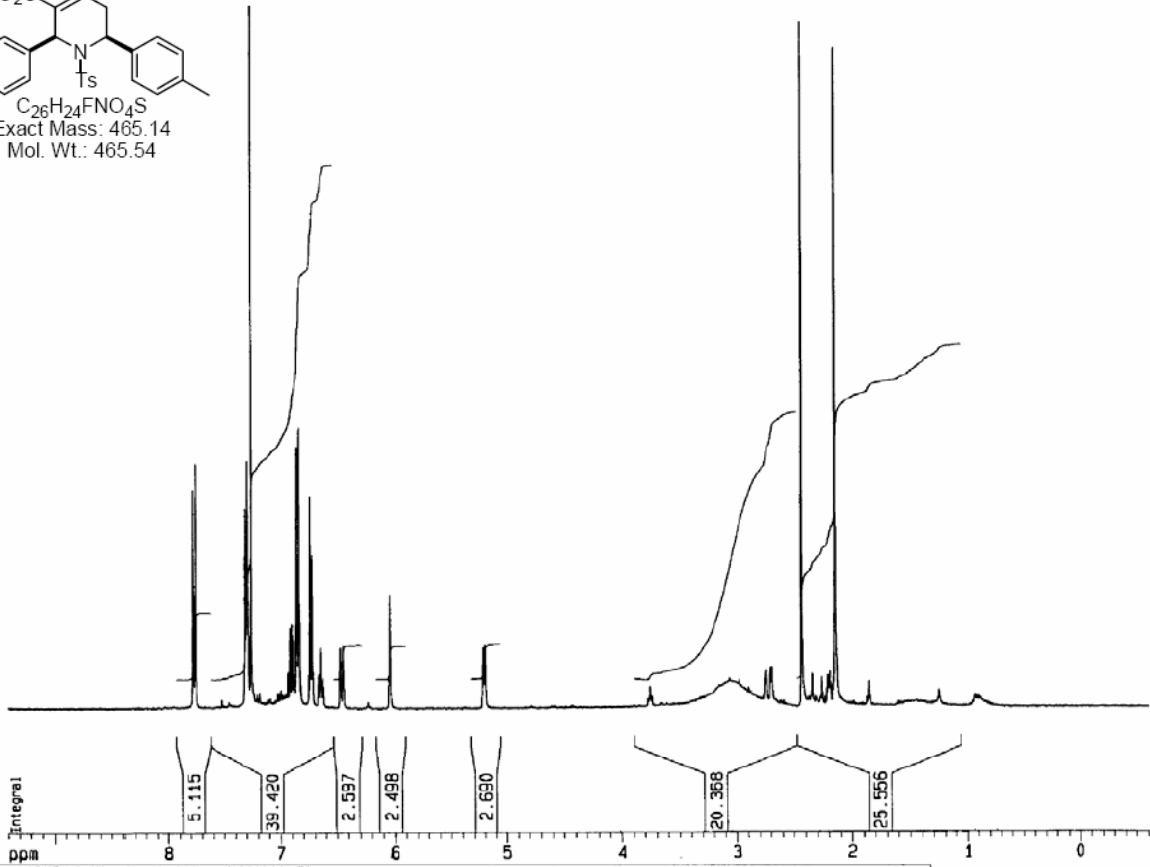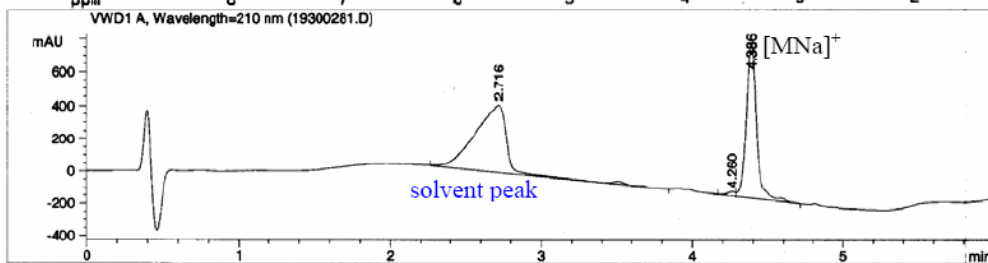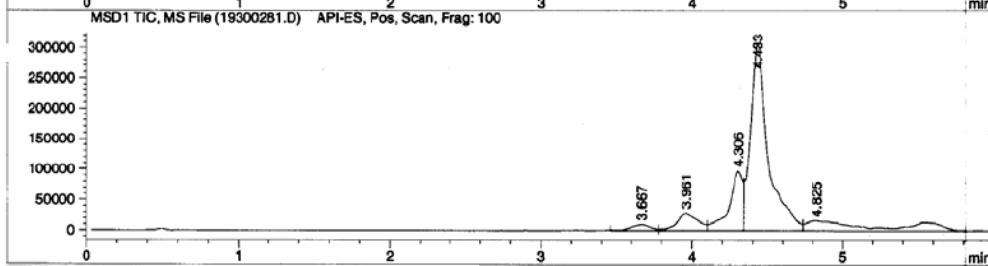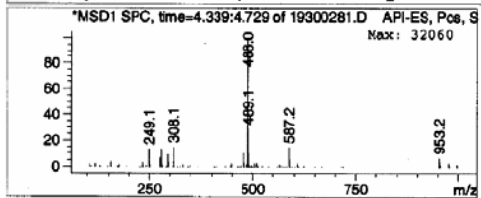

2-(3-Chlorophenyl)-1-(4-toluenesulfonyl)-6-(*p*-tolyl)-1,2,5,6-tetrahydropyridine-3-carboxylic acid (B05C02)

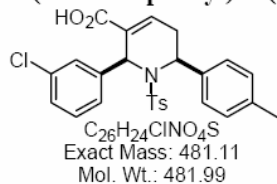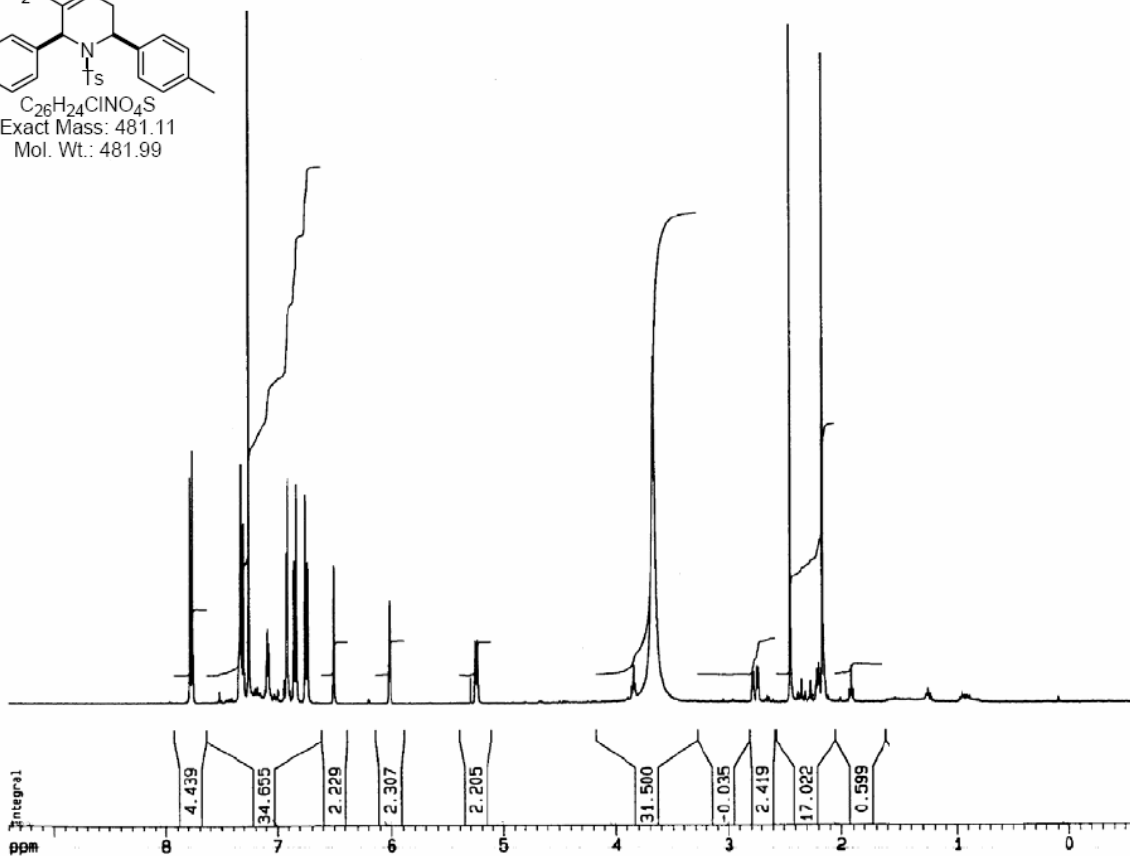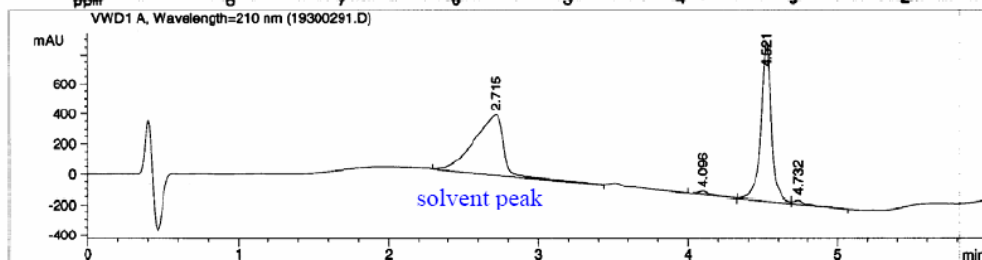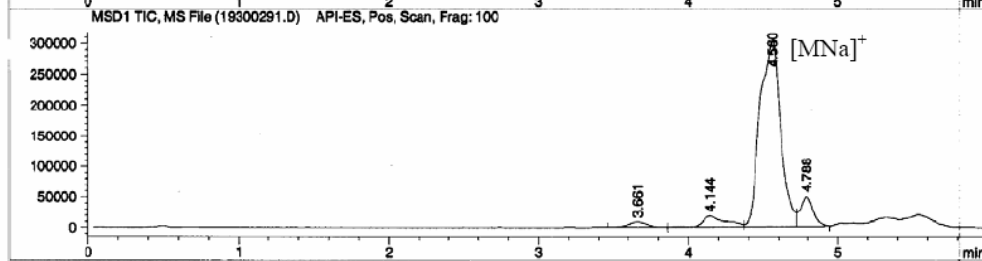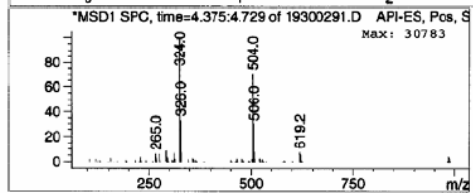

2-(3-Bromophenyl)-1-(4-toluenesulfonyl)-6-(*p*-tolyl)-1,2,5,6-tetrahydropyridine-3-carboxylic acid (B06C02)

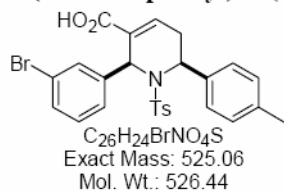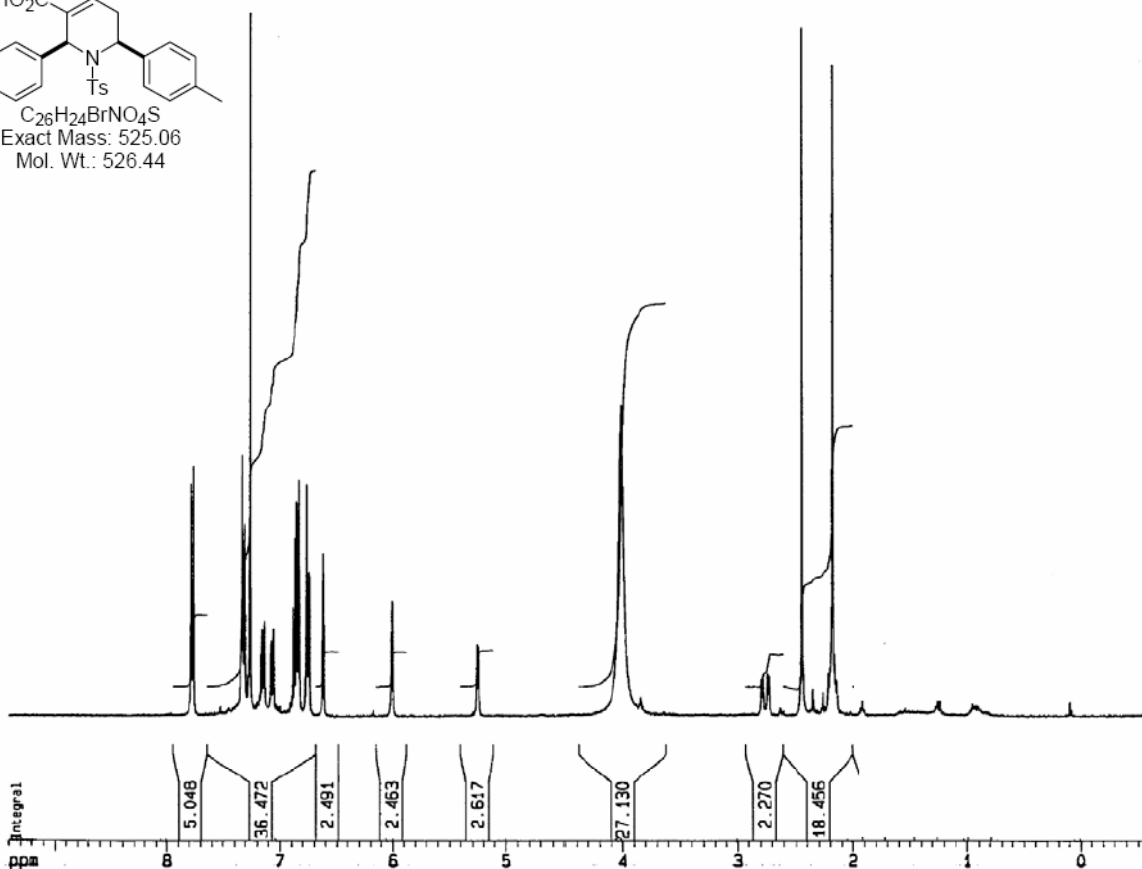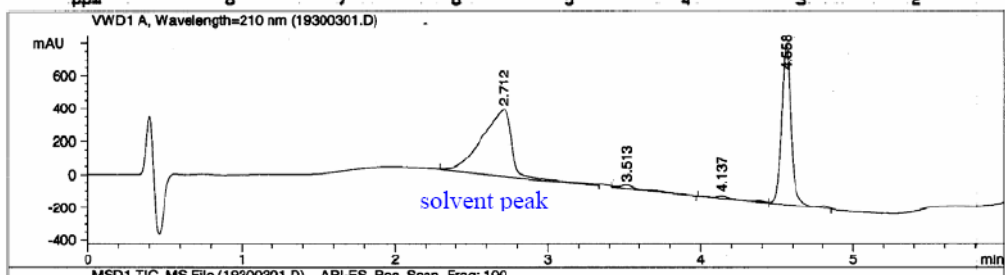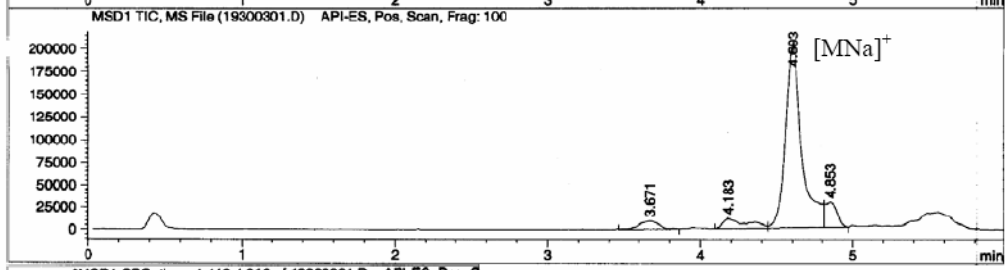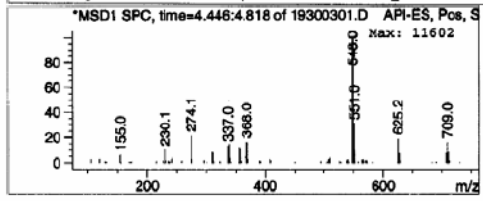

1-(4-Toluenesulfonyl)-2-(*m*-tolyl)-6-(*p*-tolyl)-1,2,5,6-tetrahydropyridine-3-carboxylic acid (B07C02)

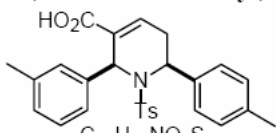

C<sub>27</sub>H<sub>27</sub>NO<sub>4</sub>S  
 Exact Mass: 461.17  
 Mol. Wt.: 461.57

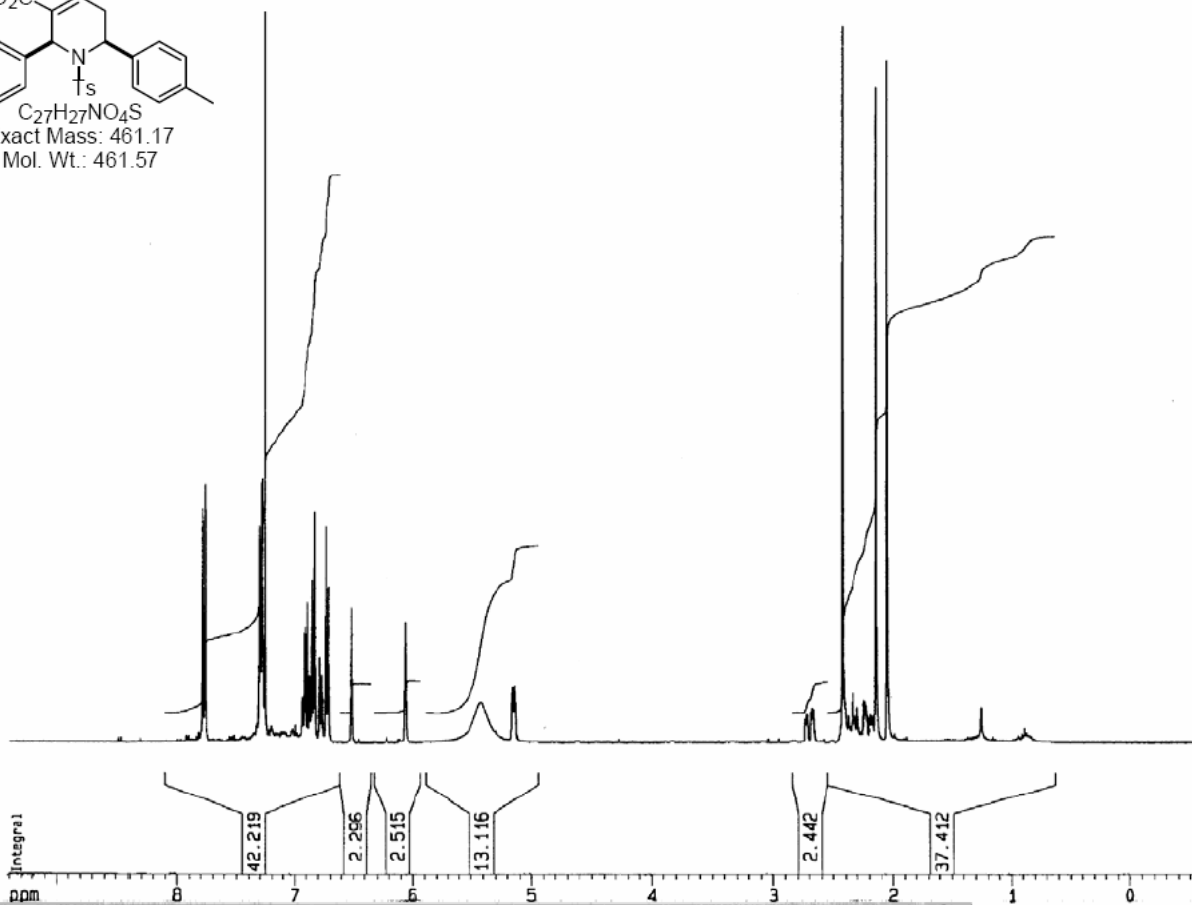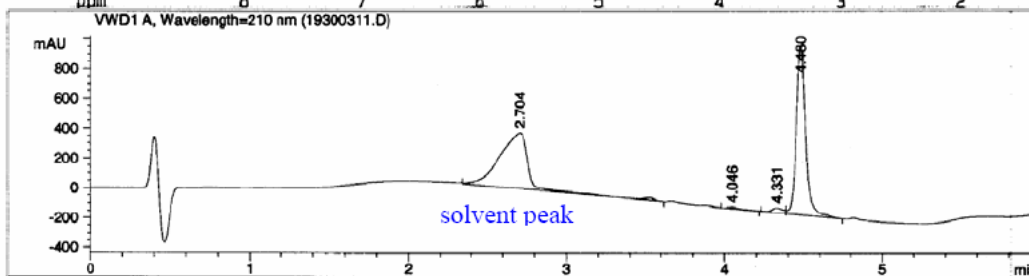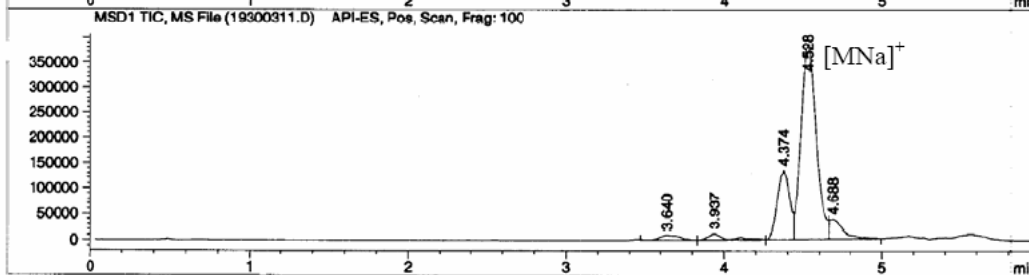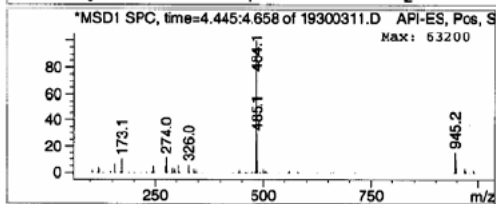

2-(4-Fluorophenyl)-1-(4-toluenesulfonyl)-6-(p-tolyl)-1,2,5,6-tetrahydropyridine-3-carboxylic acid (B08C02)

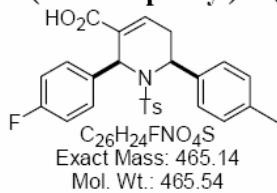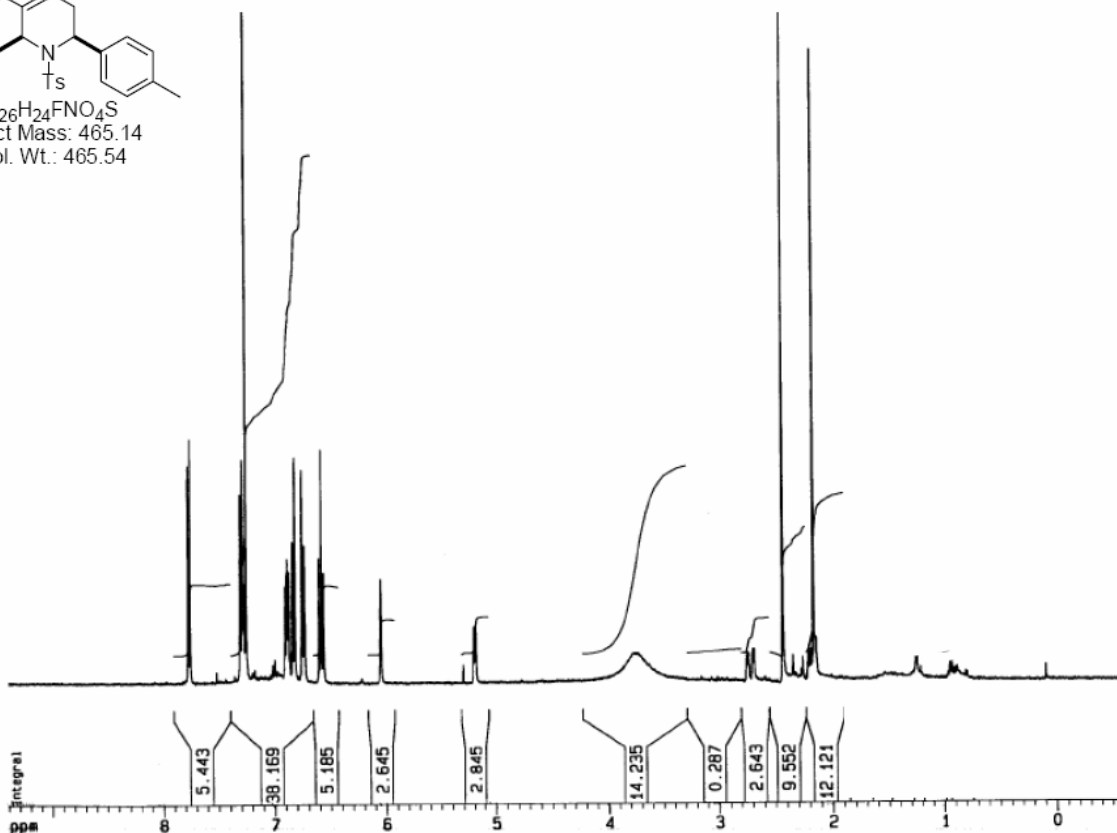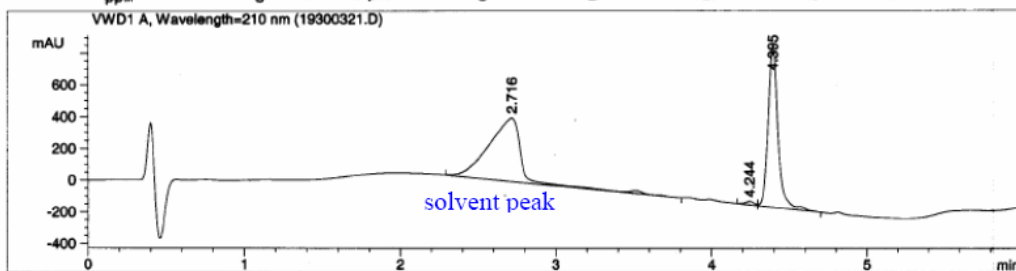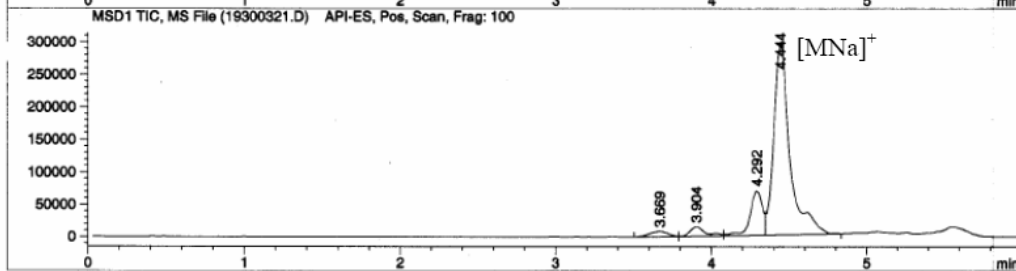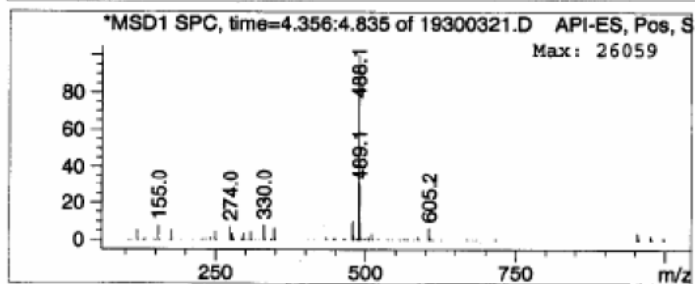



2-(4-Chlorophenyl)-1-(4-toluenesulfonyl)-6-(*p*-tolyl)-1,2,5,6-tetrahydropyridine-3-carboxylic acid (B09C02)

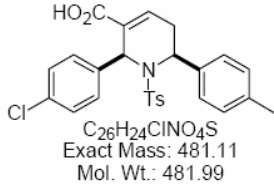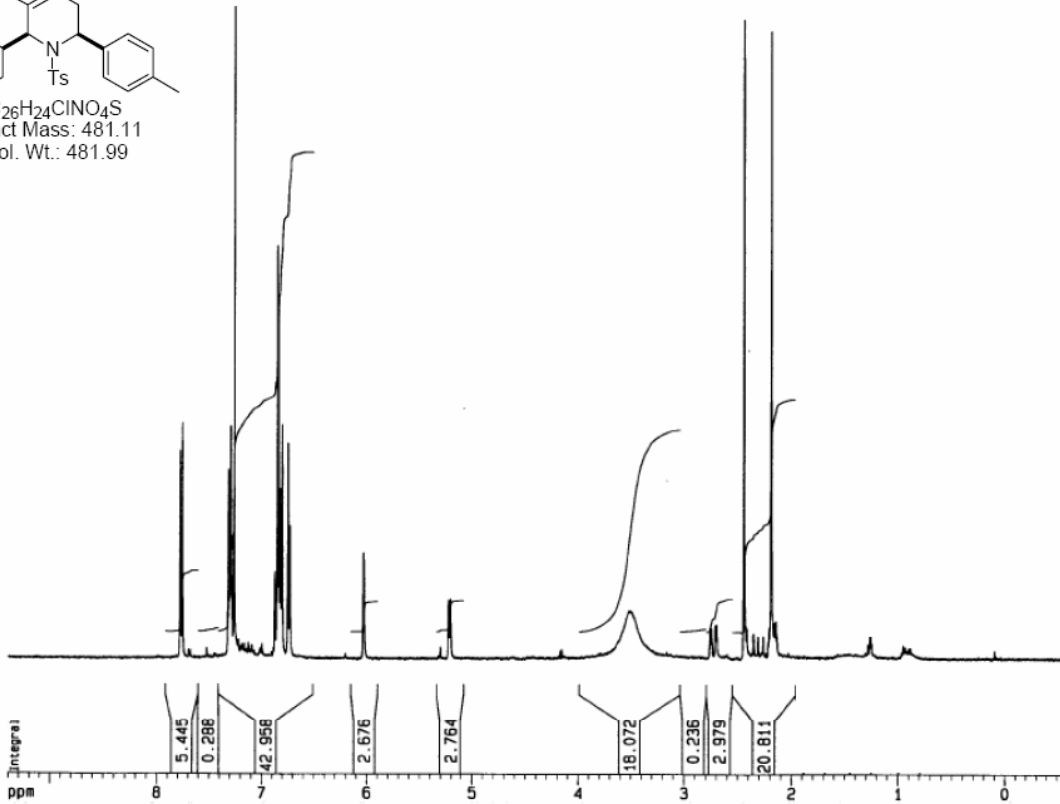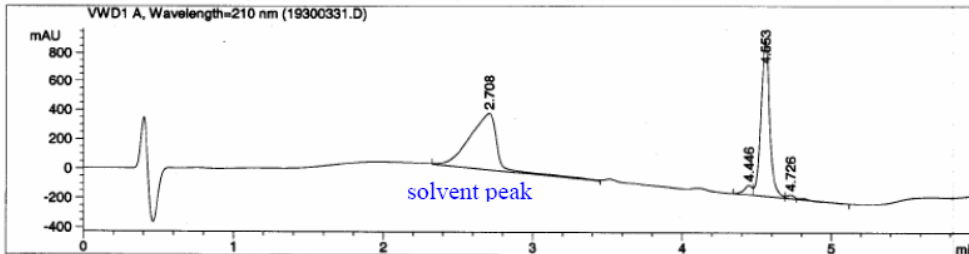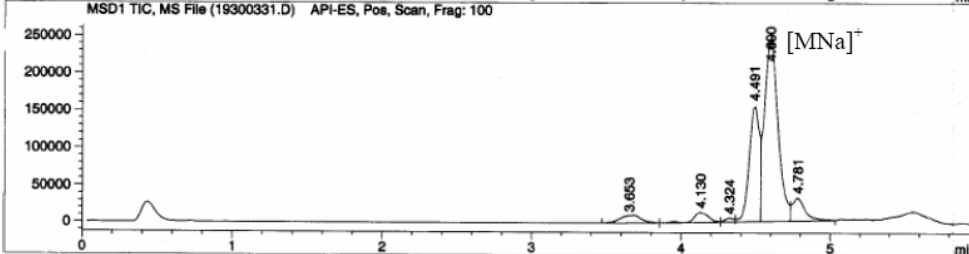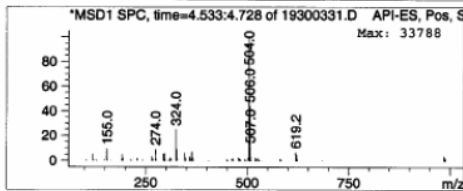

2-(4-Bromophenyl)-1-(4-toluenesulfonyl)-6-(*p*-tolyl)-1,2,5,6-tetrahydropyridine-3-carboxylic acid (B10C02)

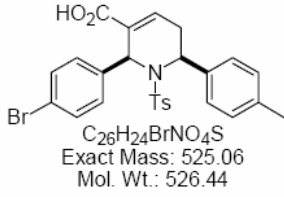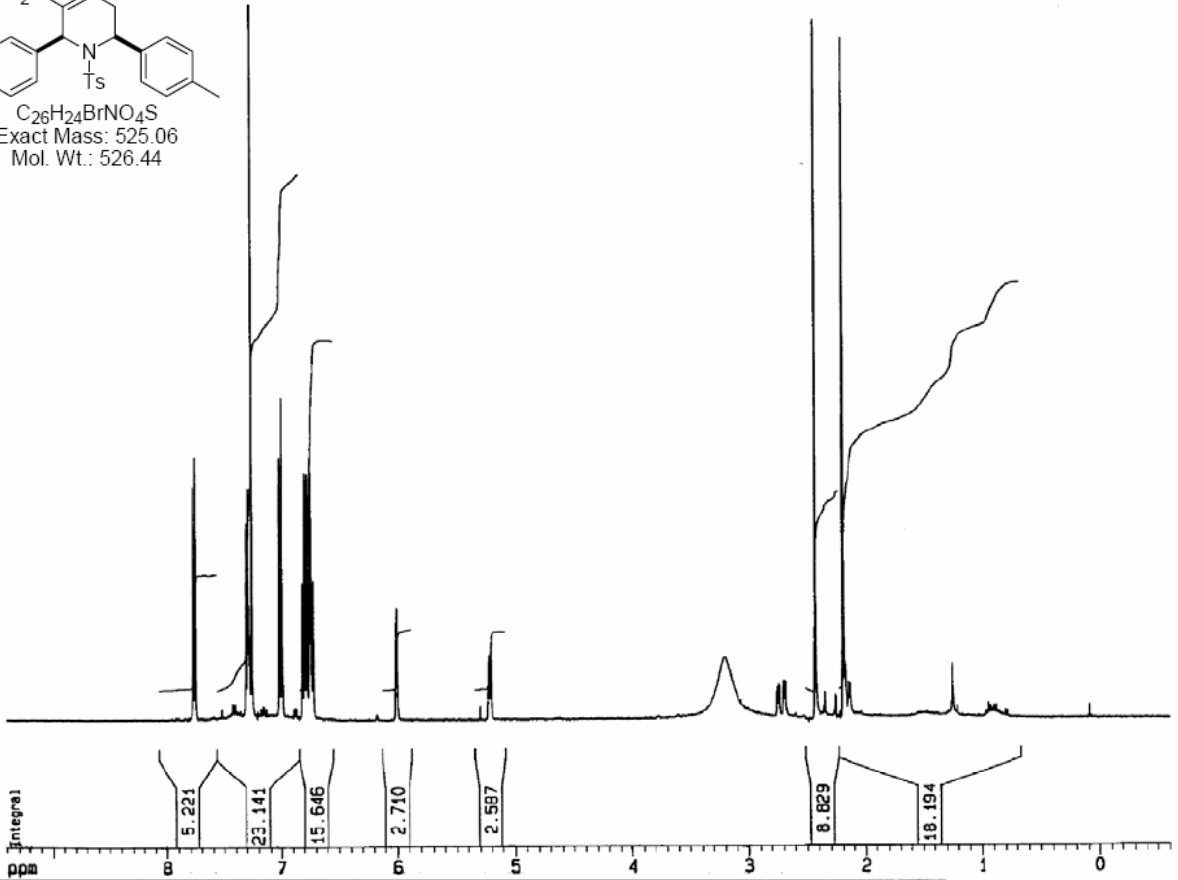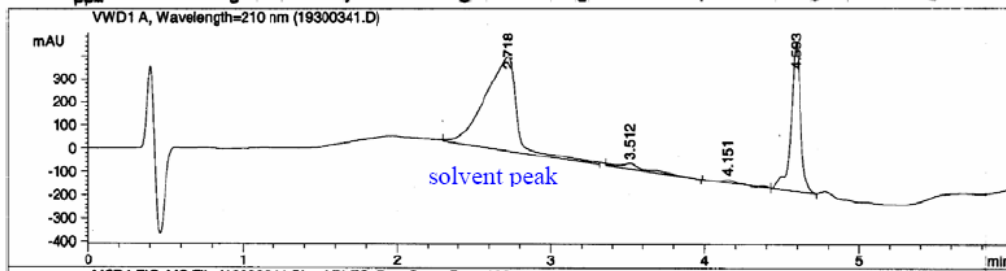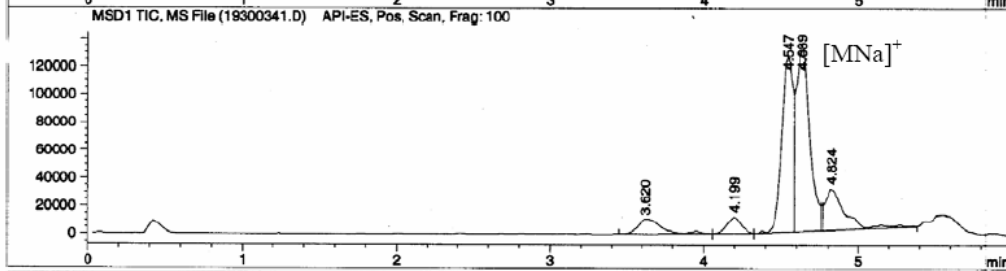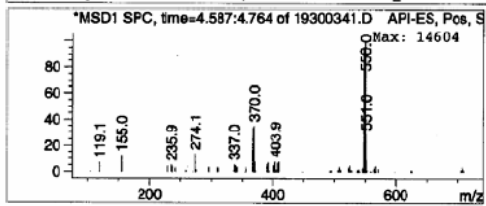

1-(4-Toluenesulfonyl)-2,6-di-(p-tolyl)-1,2,5,6-tetrahydropyridine-3-carboxylic acid (B11C02)

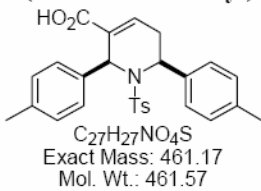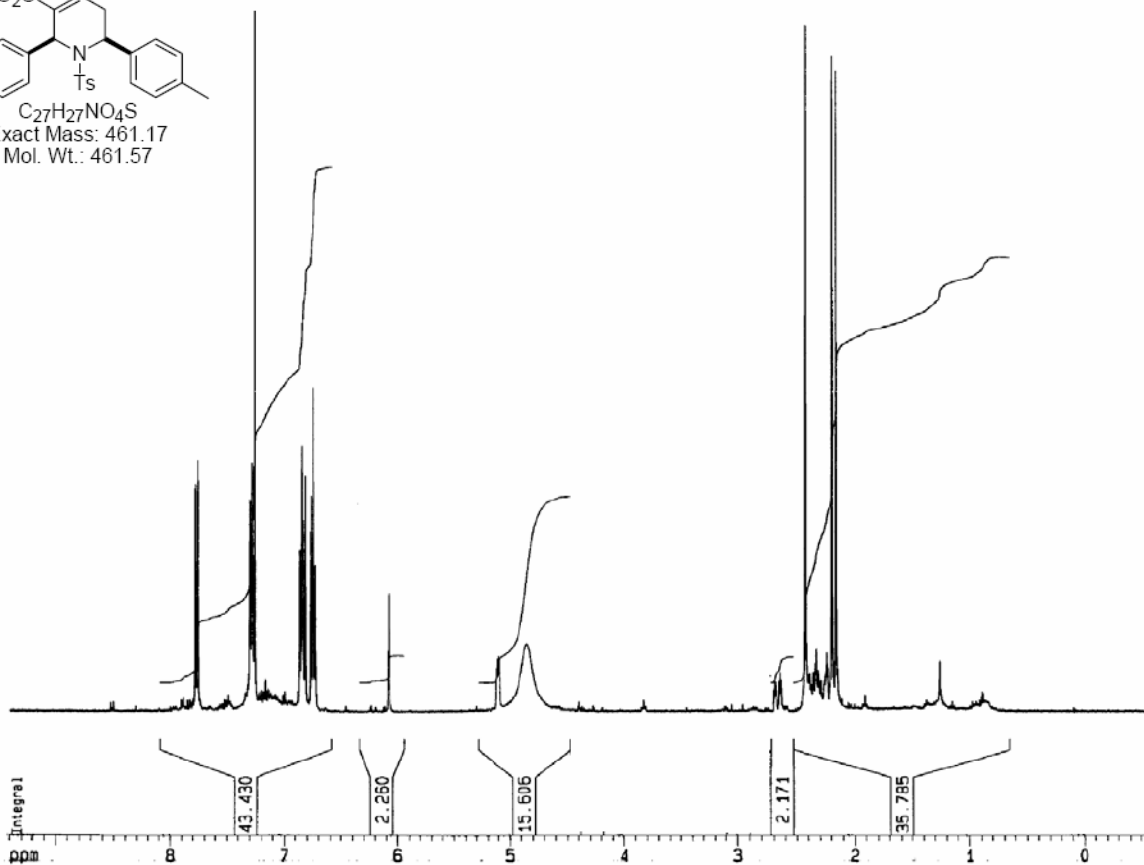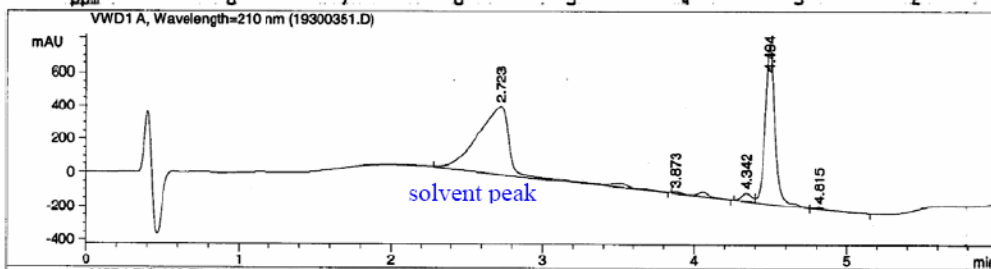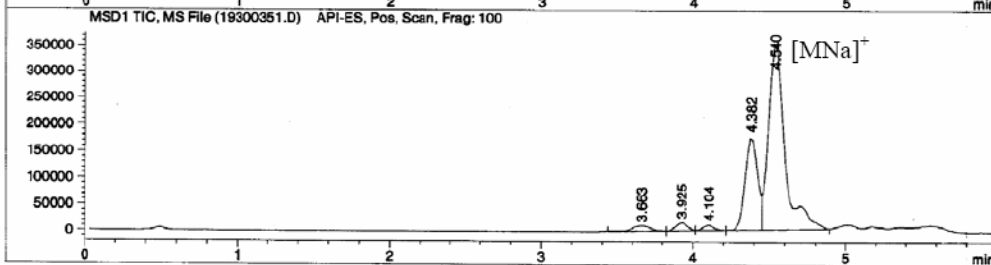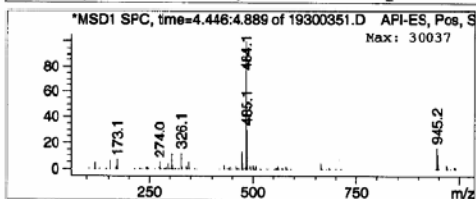

2-(4-*tert*-Butylphenyl)-1-(4-toluenesulfonyl)-6-(*p*-tolyl)-1,2,5,6-tetrahydropyridine-3-carboxylic acid acid

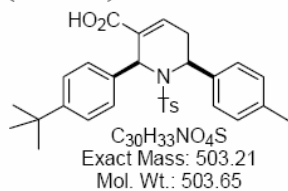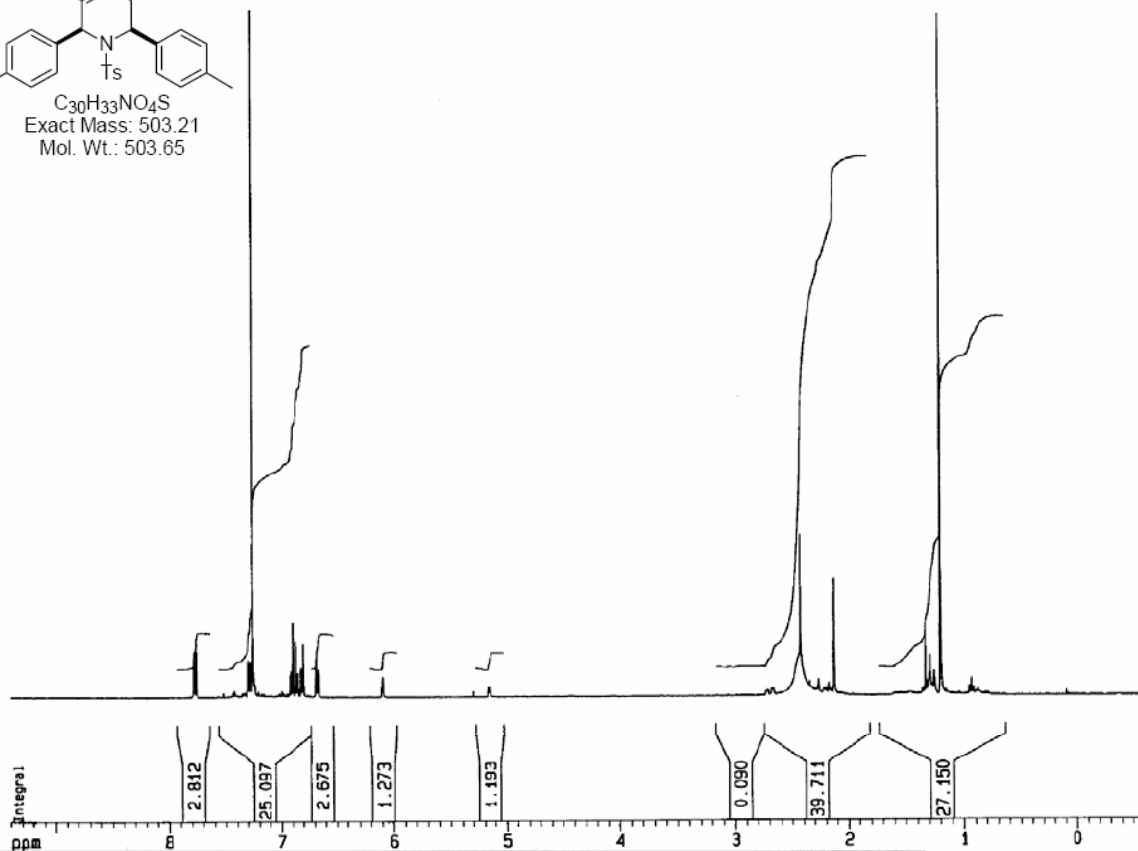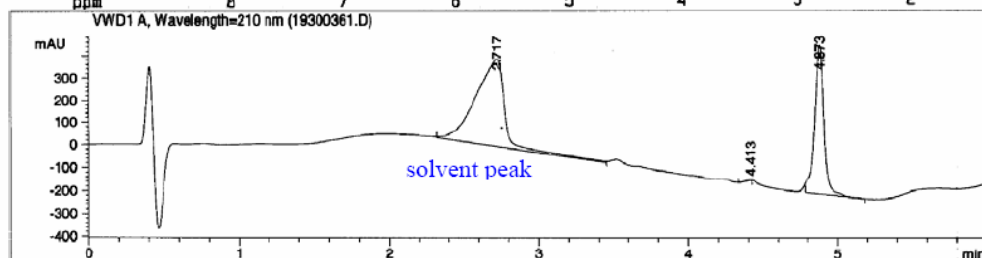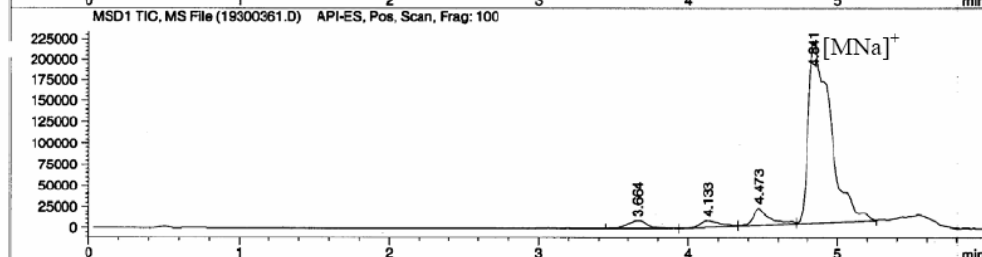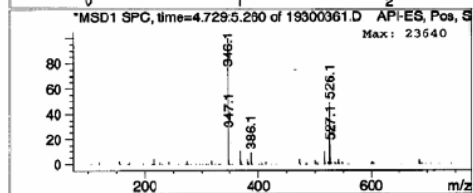

**Spectral data for Table 8**

**2-(3-Chlorophenyl)-6-phenyl-1-(4-toluenesulfonyl)-1,2,5,6-tetrahydropyridine-3-carboxylic acid (B05C01)**

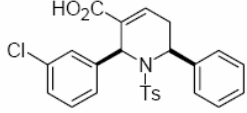

C<sub>25</sub>H<sub>22</sub>ClNO<sub>4</sub>S  
 Exact Mass: 467.10  
 Mol. Wt.: 467.96

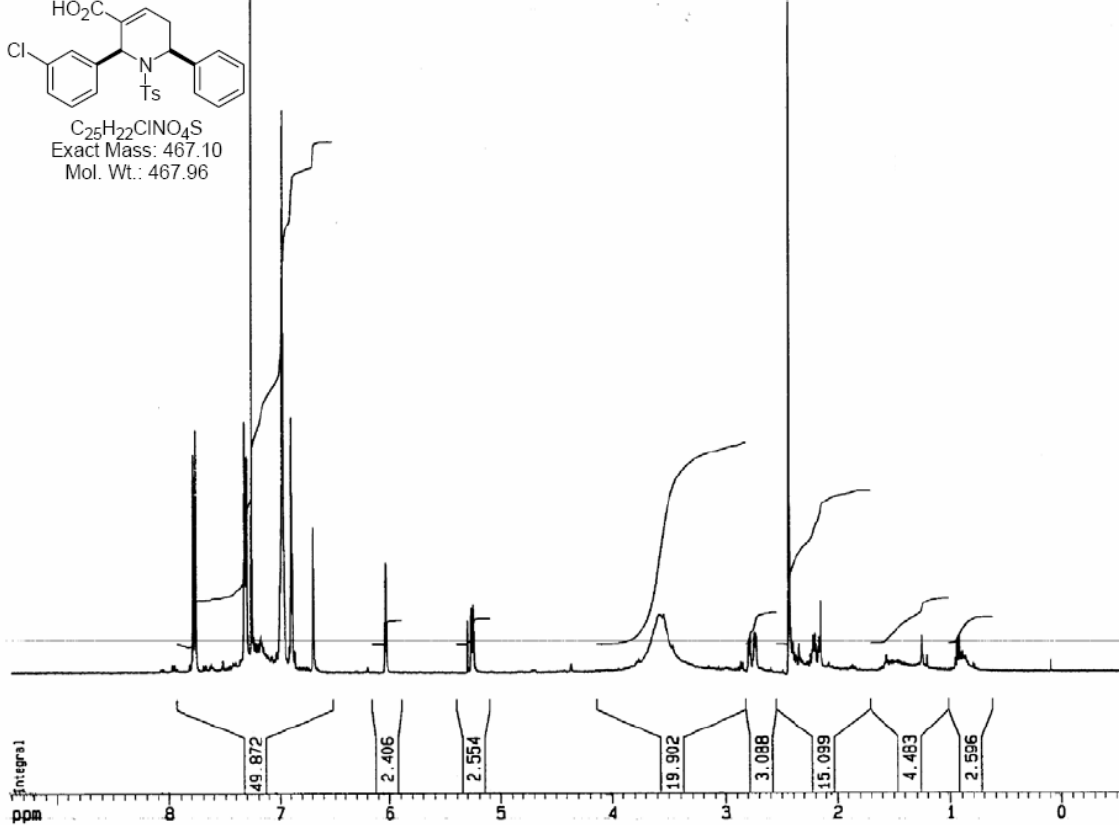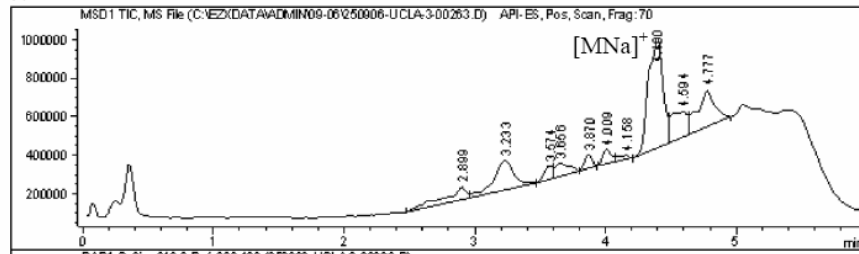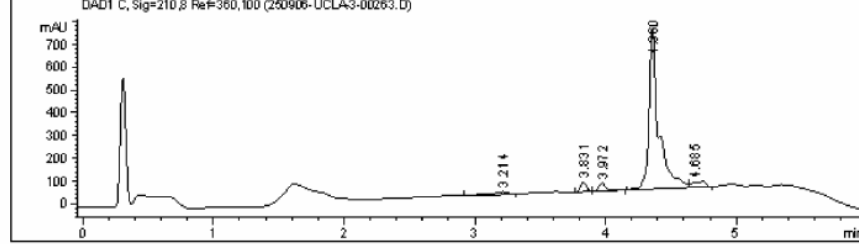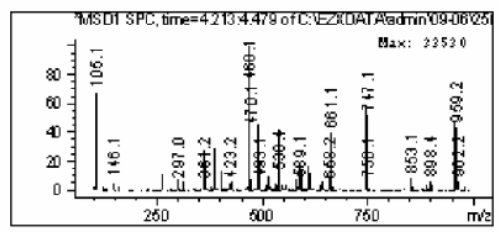

2-(3-Chlorophenyl)-1-(4-toluenesulfonyl)-6-(*p*-tolyl)-1,2,5,6-tetrahydropyridine-3-carboxylic acid (B05C02)

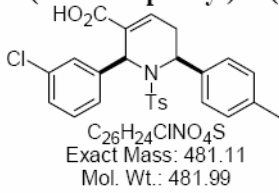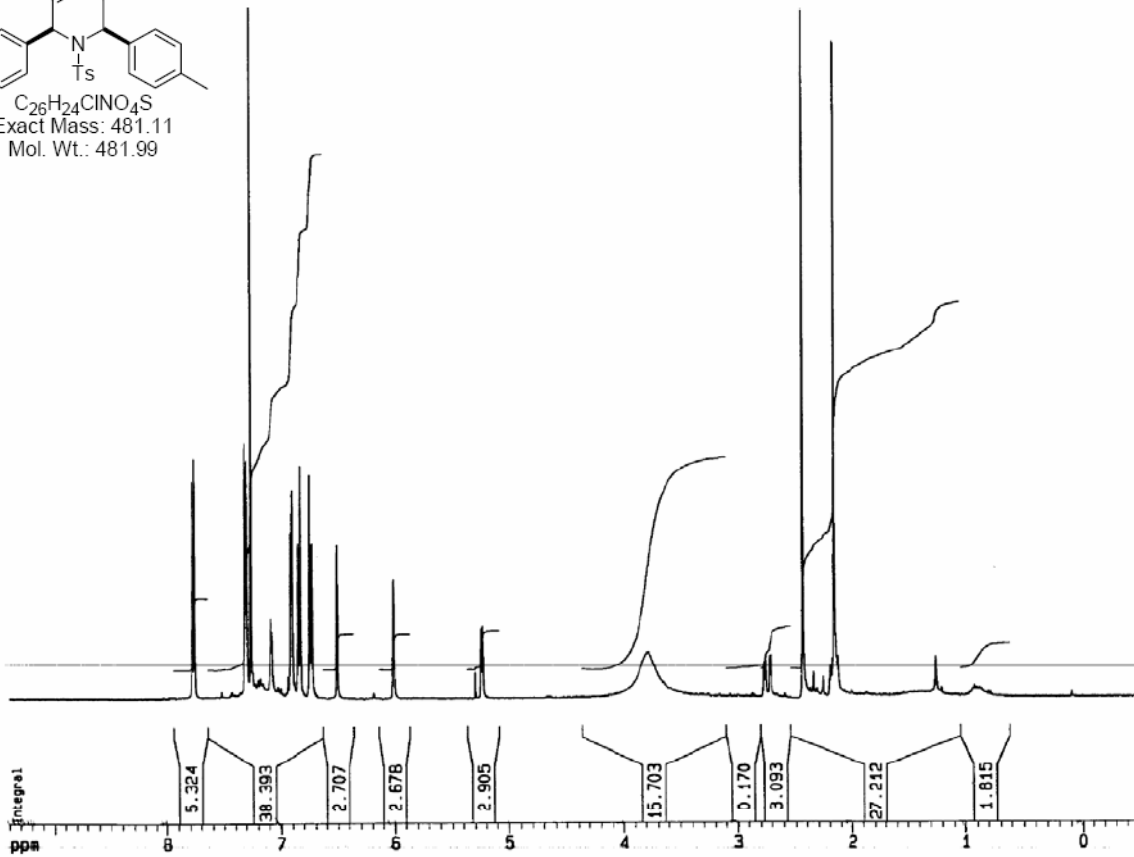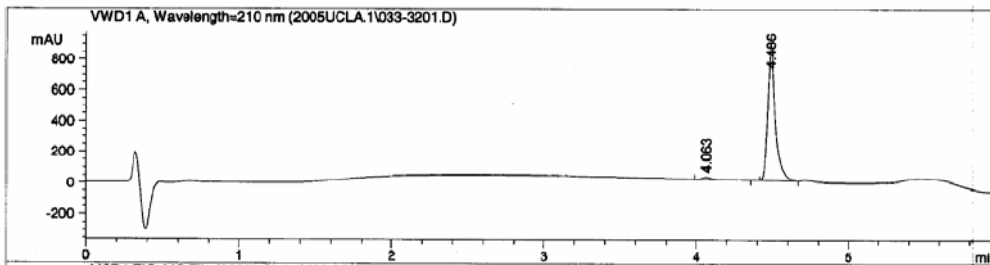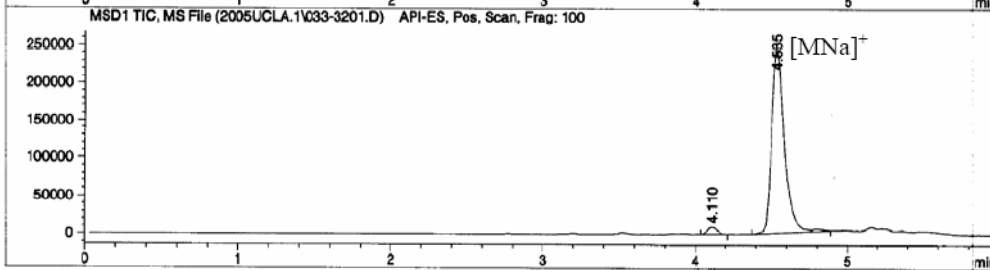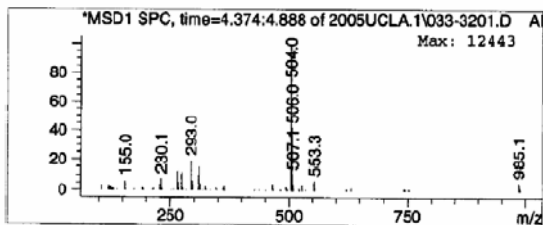

**2-(3-Chlorophenyl)-6-(4-ethylphenyl)-1-(4-toluenesulfonyl)-1,2,5,6-tetrahydropyridine-3-carboxylic acid (B05C03)**

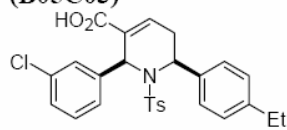

C<sub>27</sub>H<sub>26</sub>ClNO<sub>4</sub>S  
 Exact Mass: 495.13  
 Mol. Wt.: 496.02

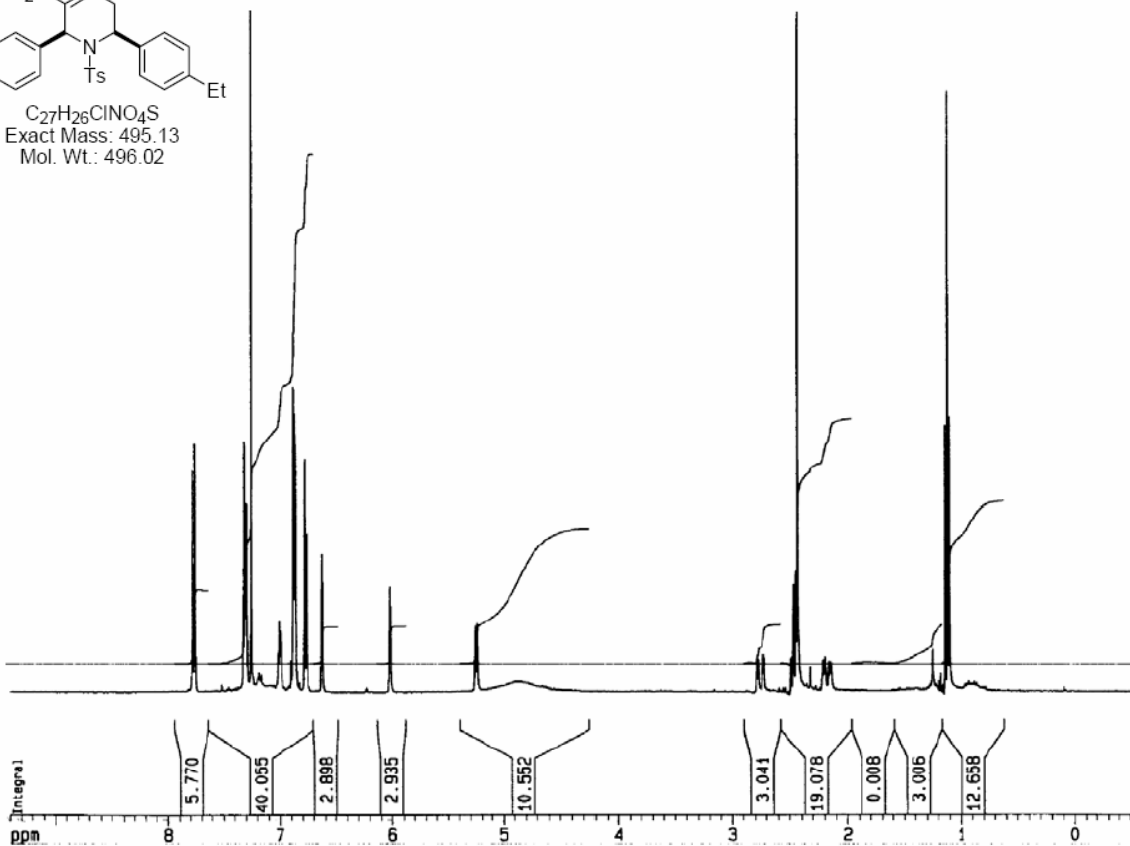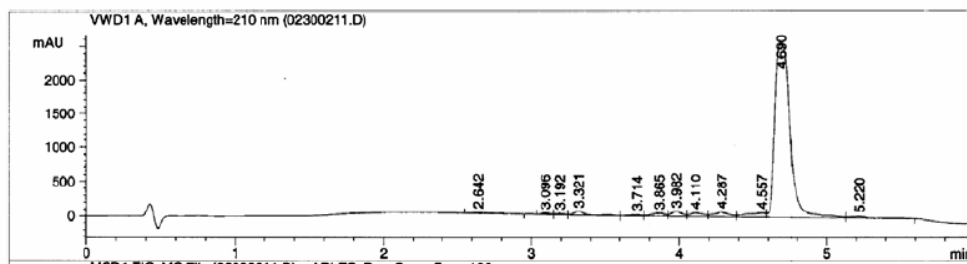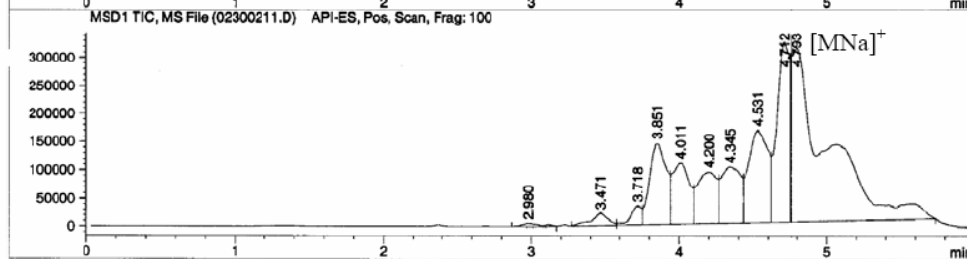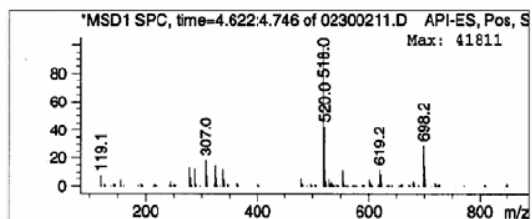

**2-(3-Chlorophenyl)-6-(4-methoxyphenyl)-1-(4-toluenesulfonyl)-1,2,5,6-tetrahydropyridine-3-carboxylic acid (B05C04)**

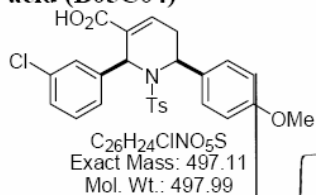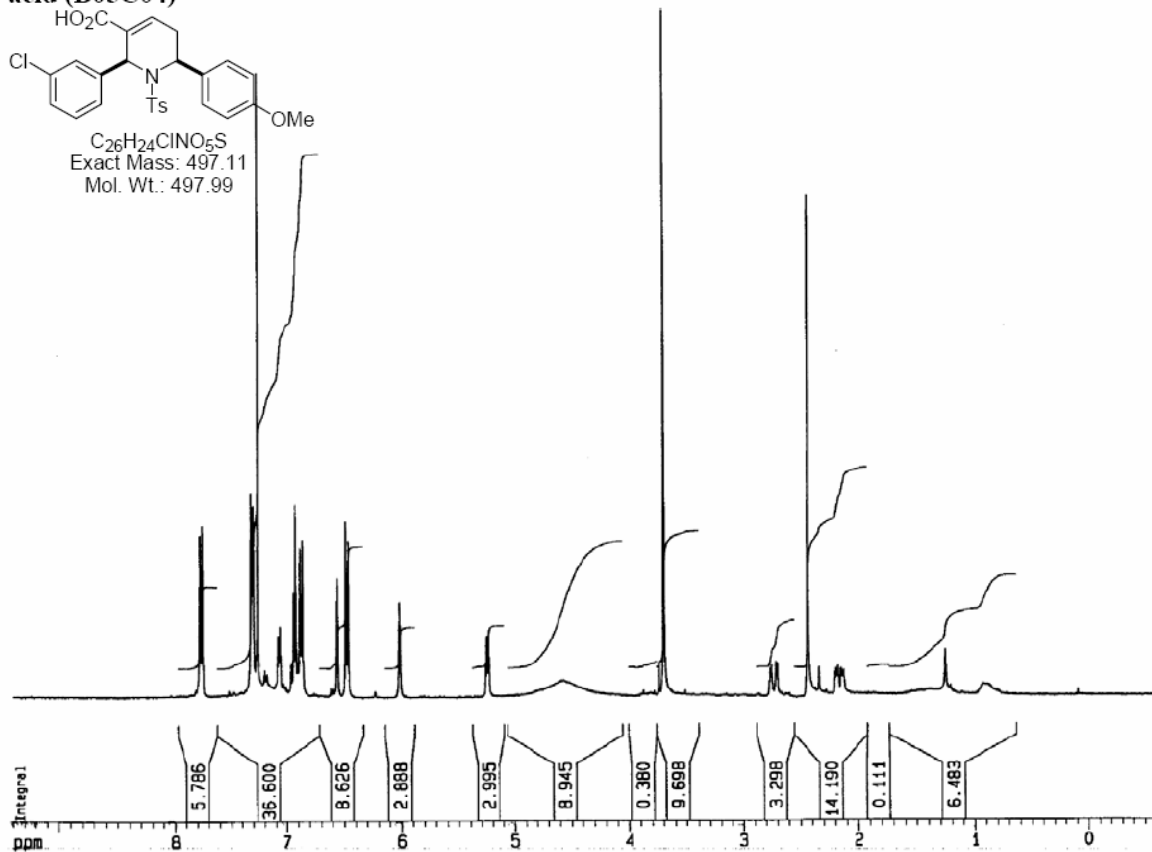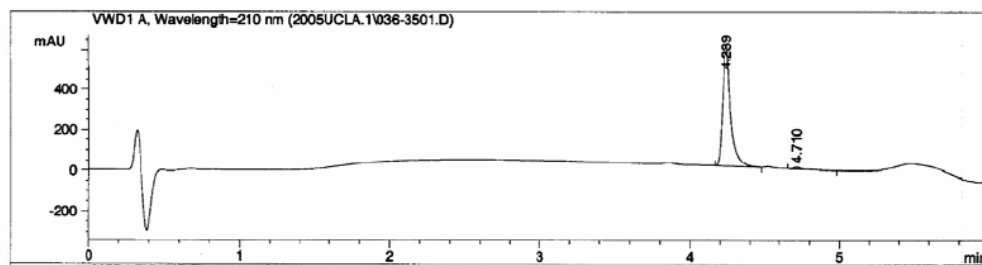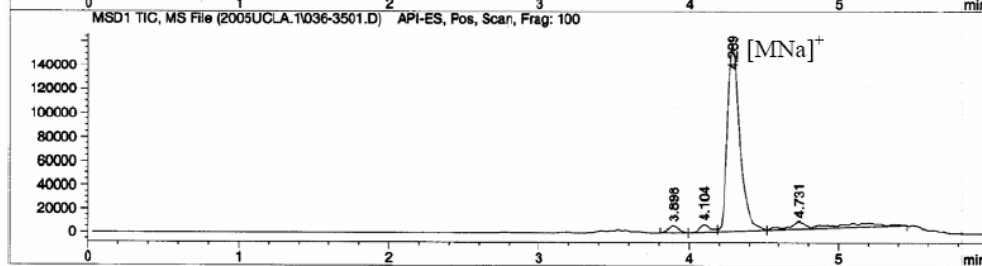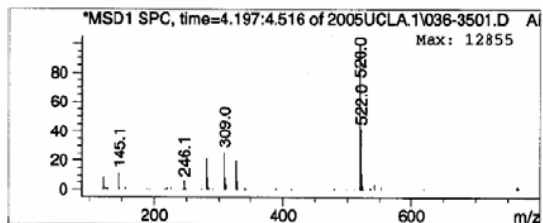



**2-(3-Chlorophenyl)-6-(4-ethoxyphenyl)-1-(4-toluenesulfonyl)-1,2,5,6-tetrahydropyridine-3-carboxylic acid (B05C05)**

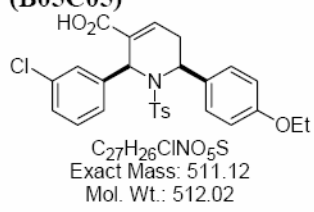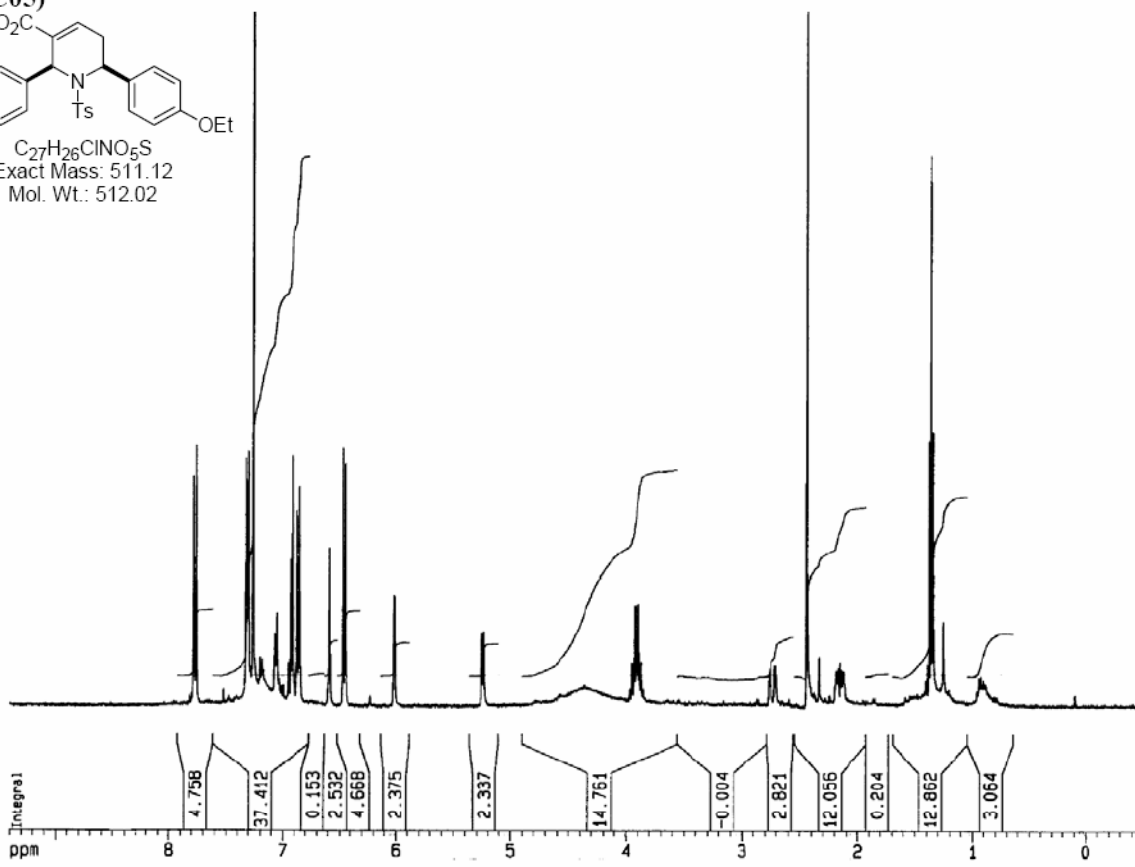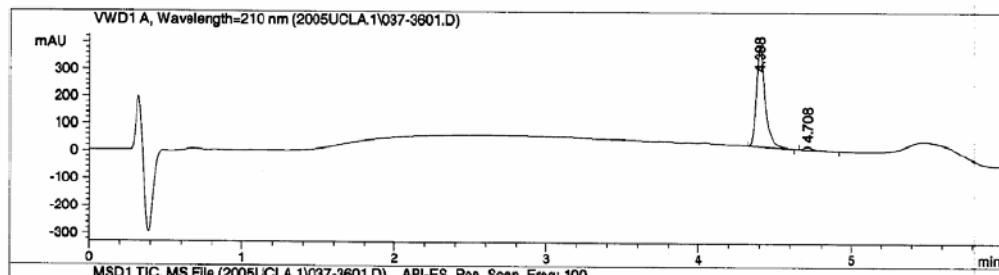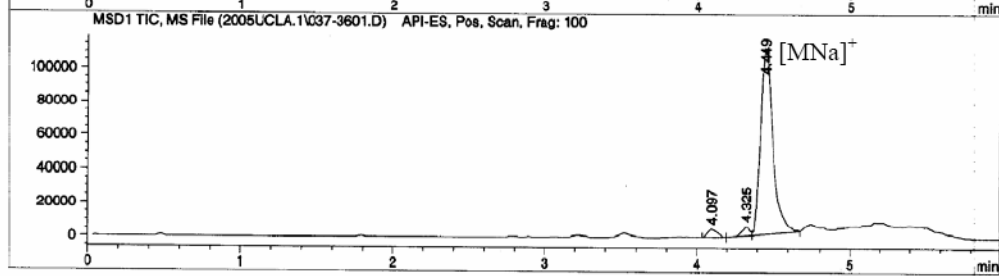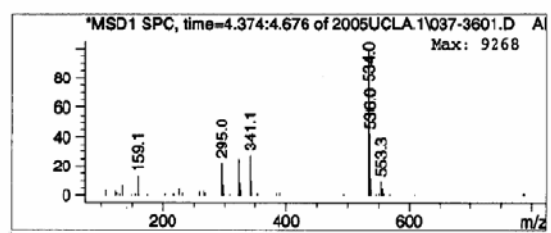

**6-(Benzo[1,3]dioxol-5-yl)-2-(3-chlorophenyl)-1-(4-toluenesulfonyl)-1,2,5,6-tetrahydropyridine-3-carboxylic acid (B05C06)**

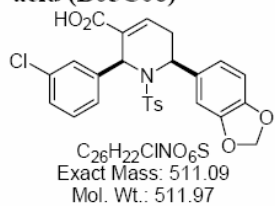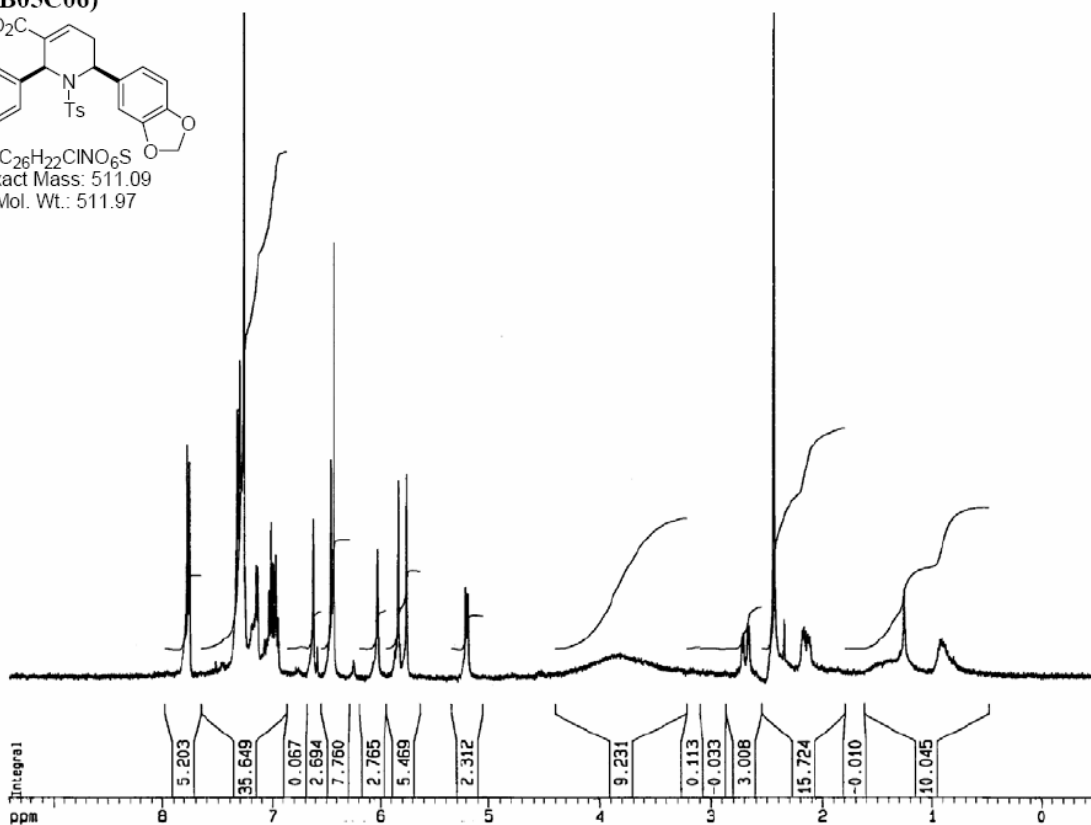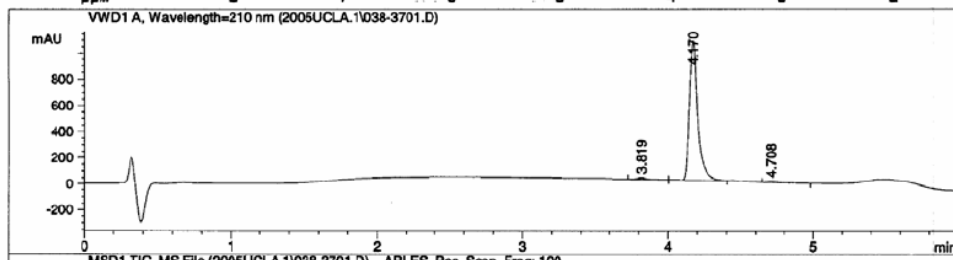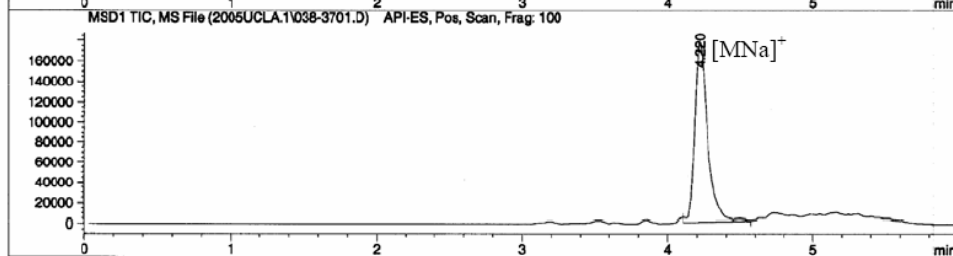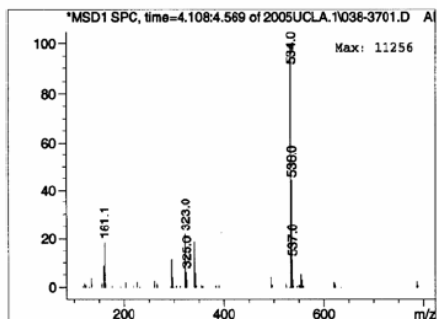

**2-(3-Chlorophenyl)-6-(4-dimethylaminophenyl)-1-(4-toluenesulfonyl)-1,2,5,6-tetrahydropyridine-3-carboxylic acid (B05C07)**

Not included

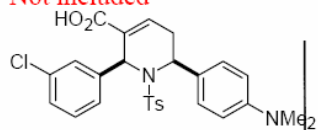

C<sub>27</sub>H<sub>27</sub>ClN<sub>2</sub>O<sub>4</sub>S  
Exact Mass: 510.14  
Mol. Wt.: 511.03

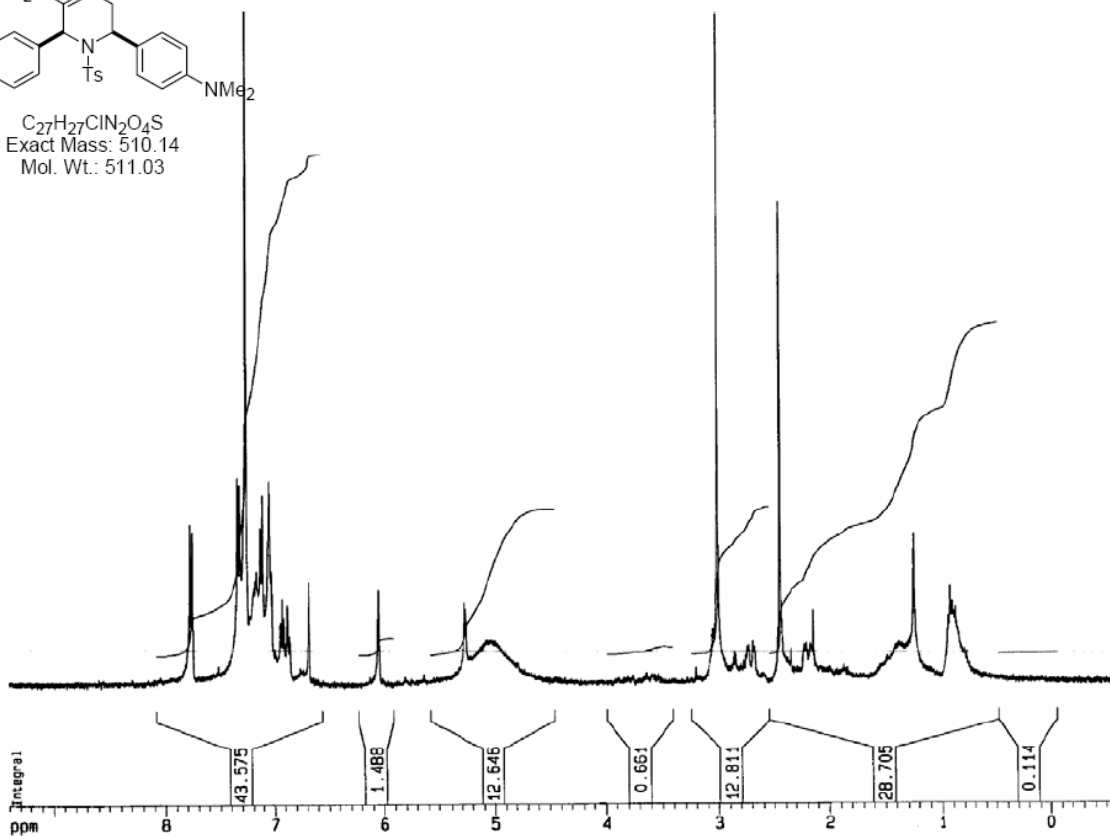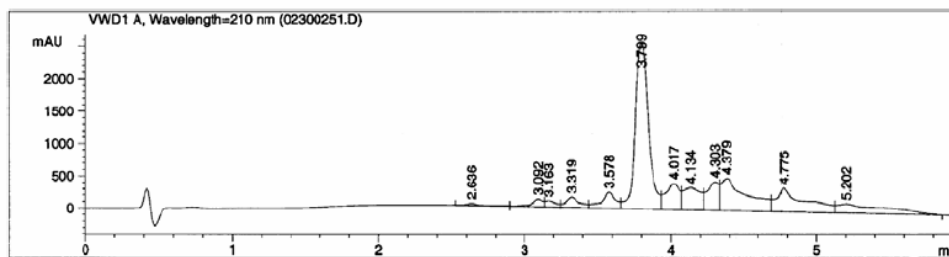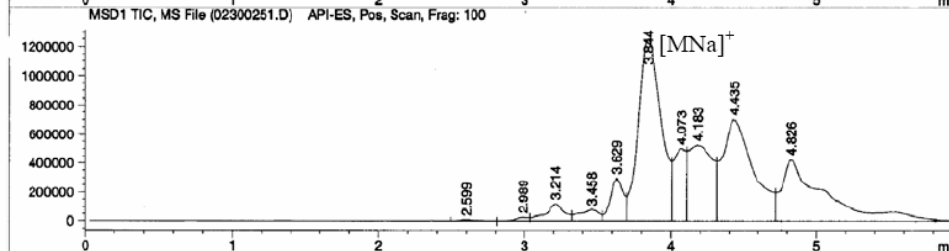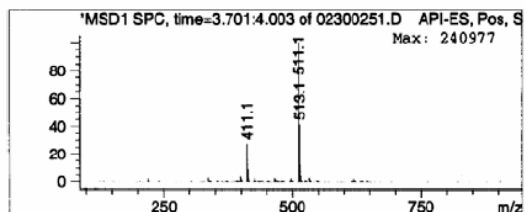

**2-(3-Chlorophenyl)-6-(4-cyanophenyl)-1-(4-toluenesulfonyl)-1,2,5,6-tetrahydropyridine-3-carboxylic acid (B05C09)**

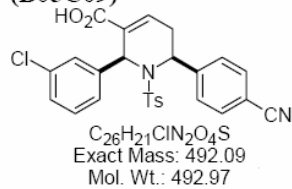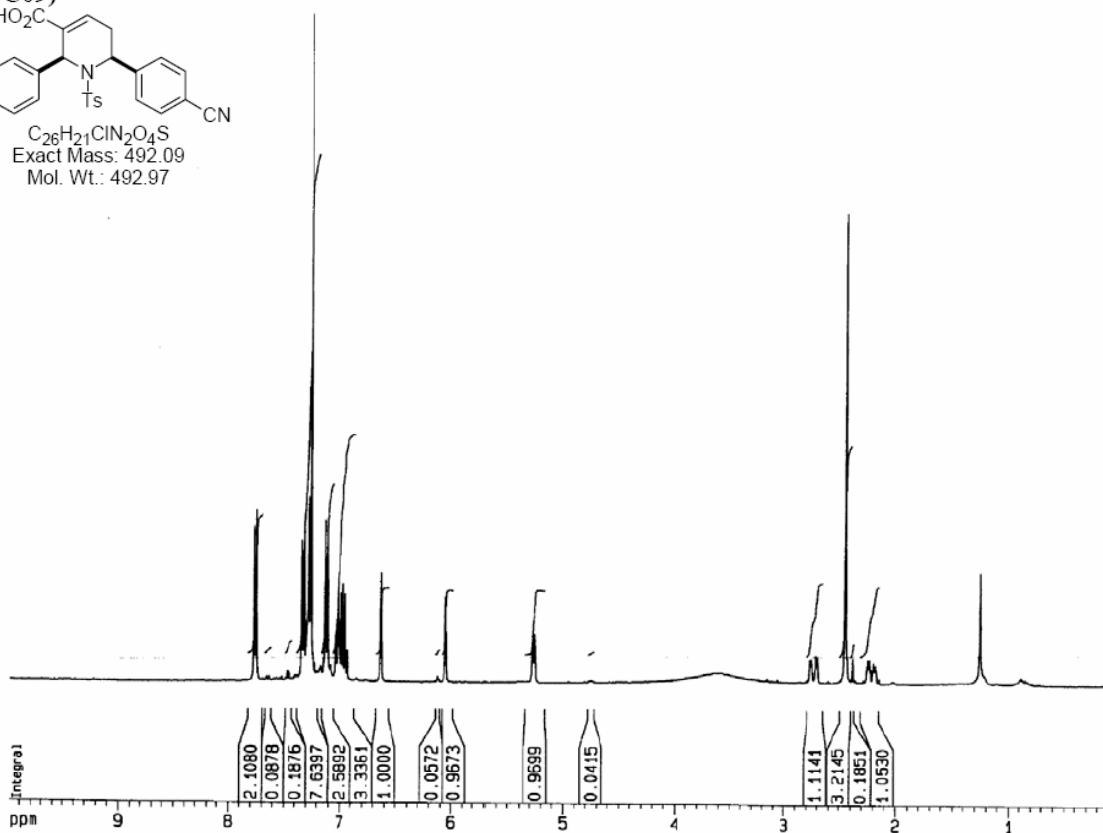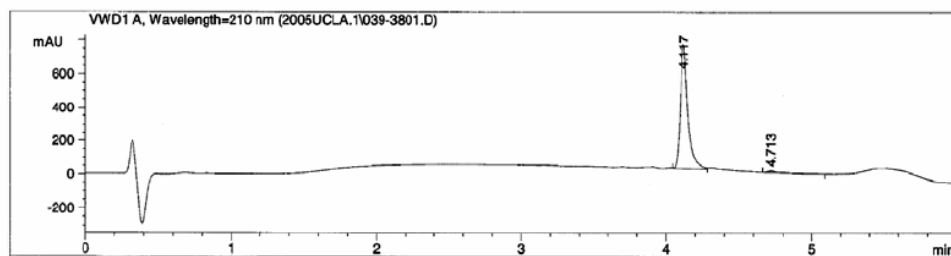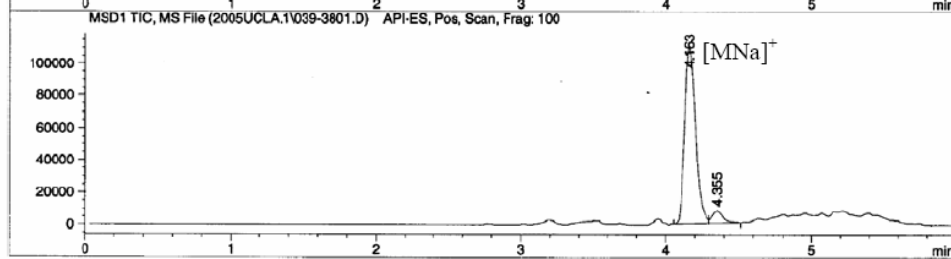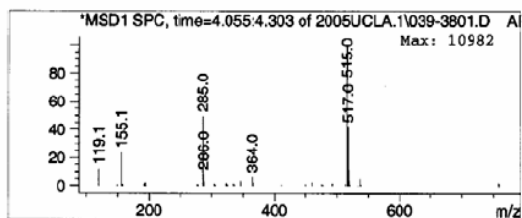

**2-(3-Chlorophenyl)-6-(2-fluorophenyl)-1-(4-toluenesulfonyl)-1,2,5,6-tetrahydropyridine-3-carboxylic acid (B05C10)**

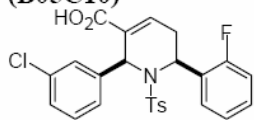

C<sub>25</sub>H<sub>21</sub>ClFNO<sub>4</sub>S  
 Exact Mass: 485.09  
 Mol. Wt.: 485.95

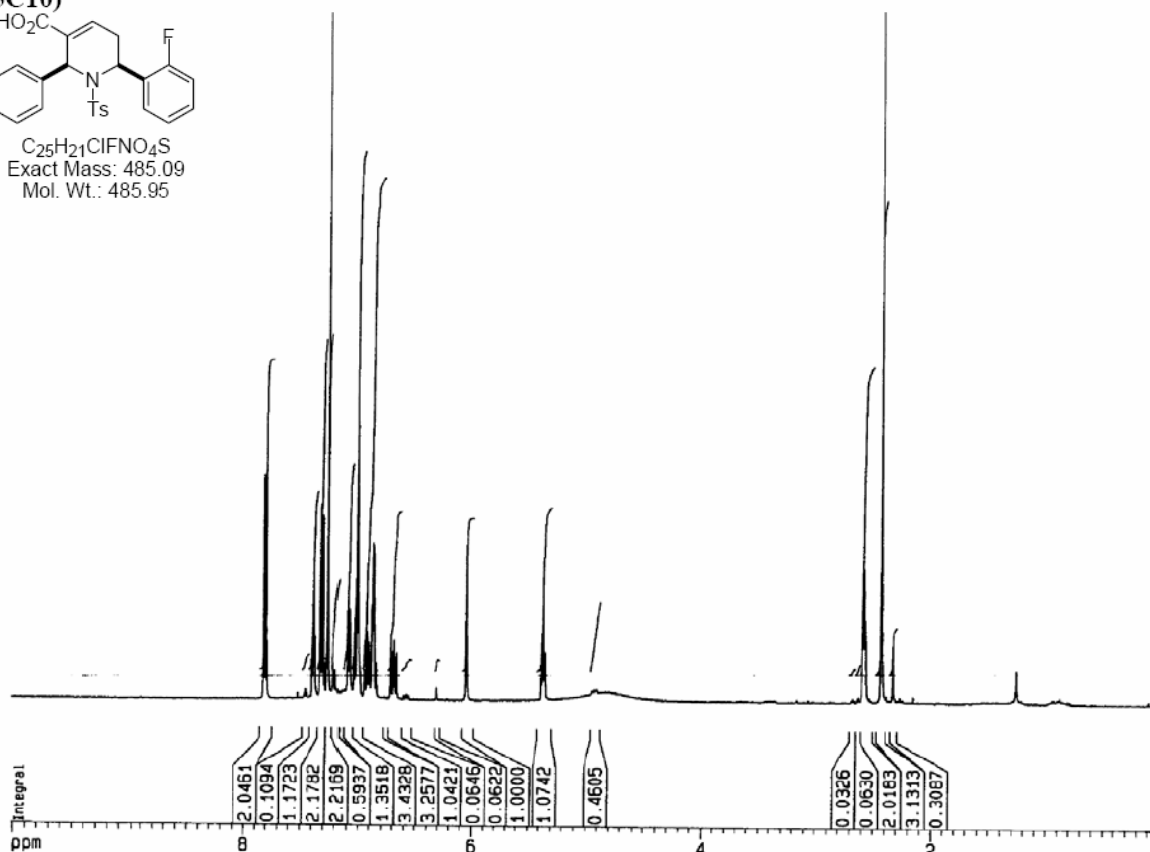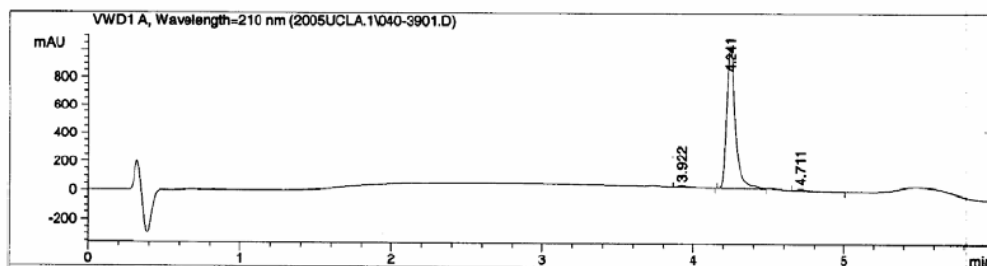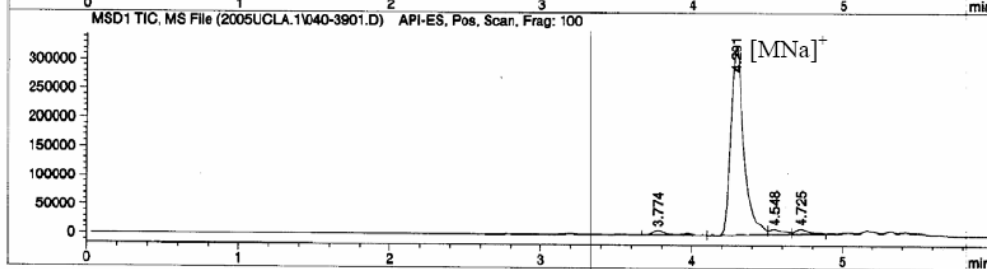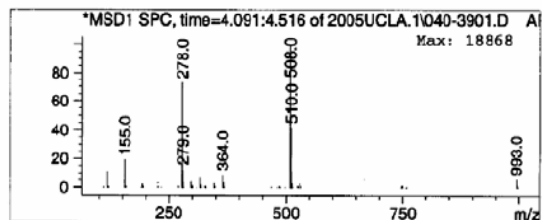

**6-(4-Chlorophenyl)-2-(3-chlorophenyl)-1-(4-toluenesulfonyl)-1,2,5,6-tetrahydropyridine-3-carboxylic acid (B05C11)**

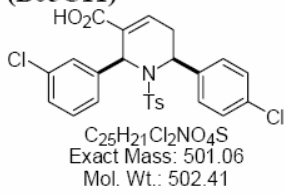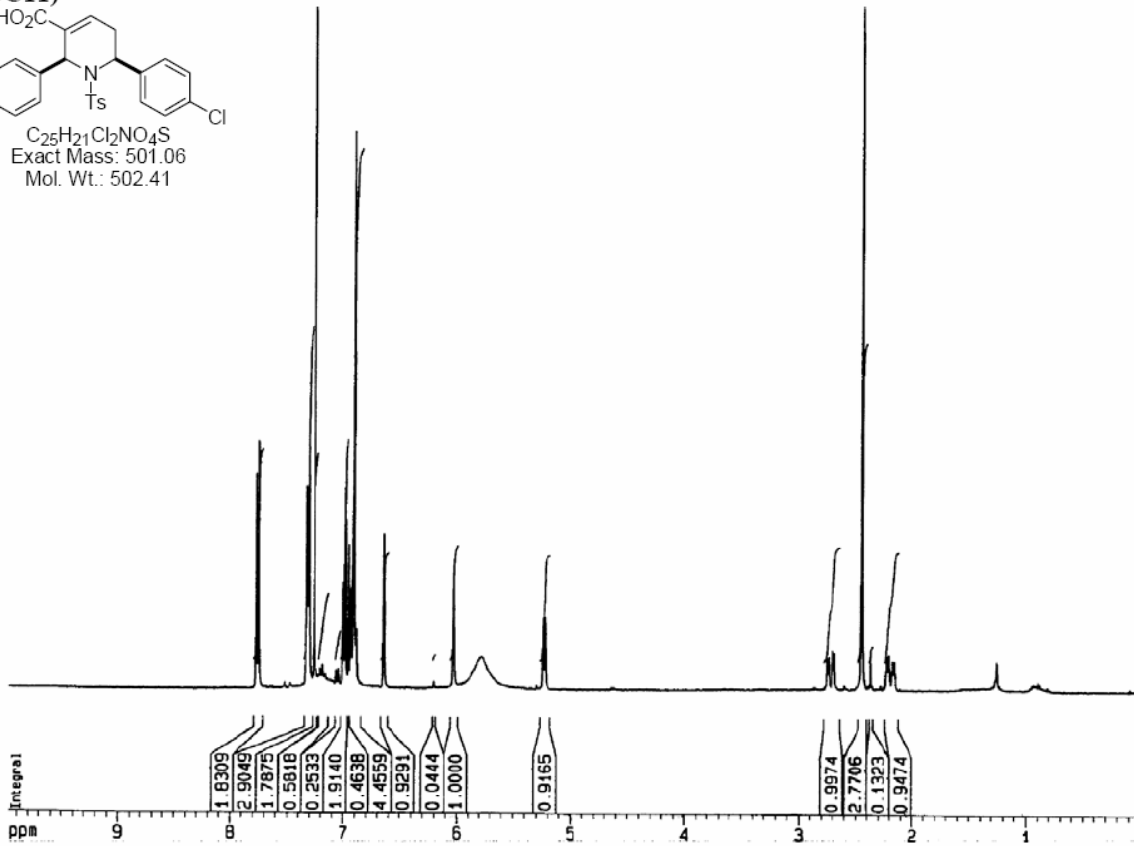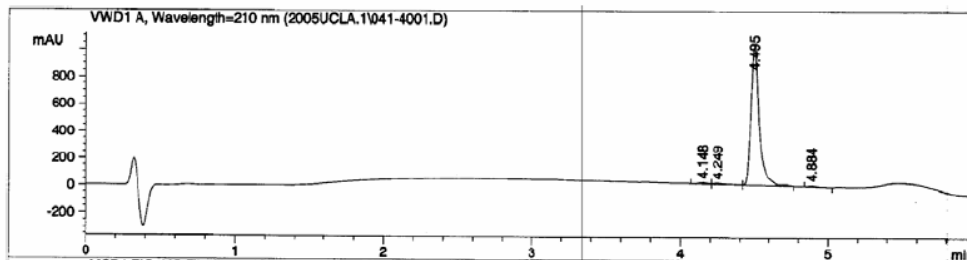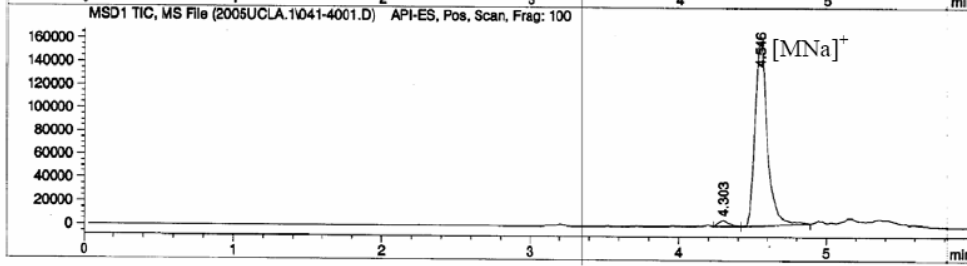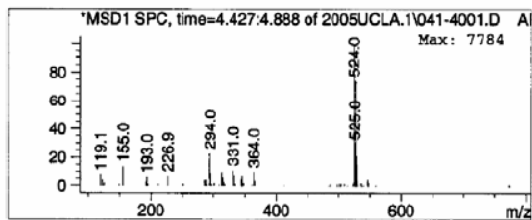

2,6-Bis-(3-chlorophenyl)-1-(4-toluenesulfonyl)-1,2,5,6-tetrahydropyridine-3-carboxylic acid (B05C12)

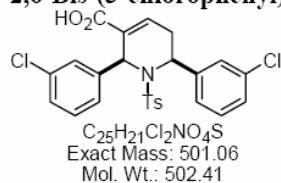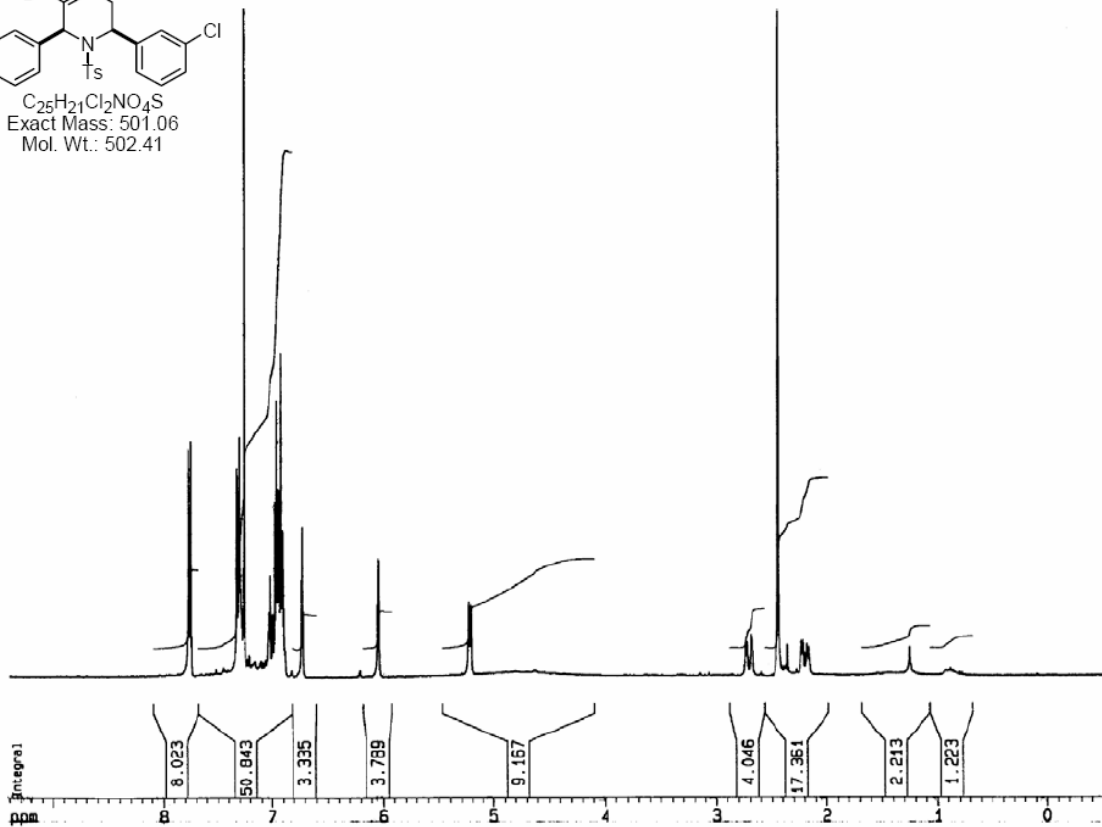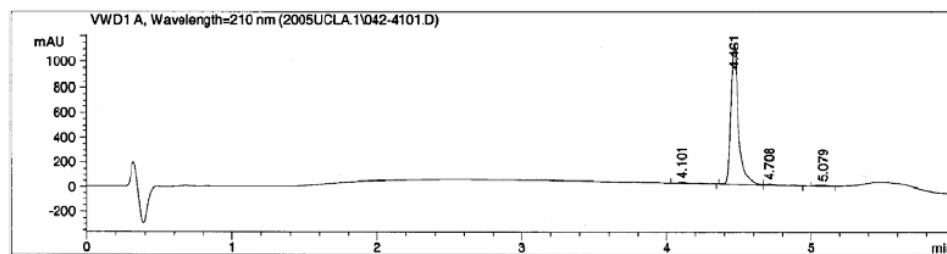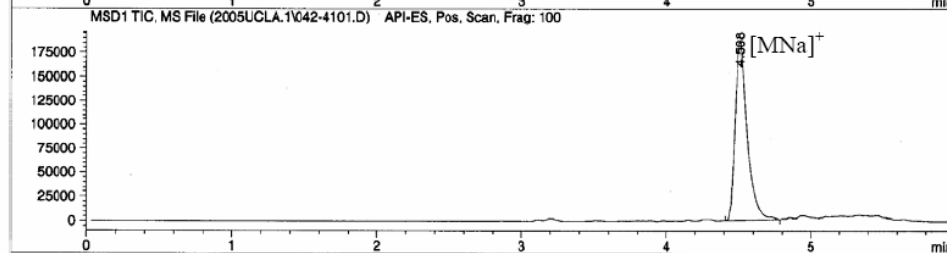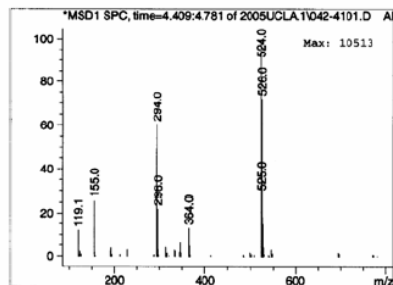

**2-(3-Chlorophenyl)-6-(3,4-dichlorophenyl)-1-(toluene-4-sulfonyl)-1,2,5,6-tetrahydropyridine-3-carboxylic acid (B05C13)**

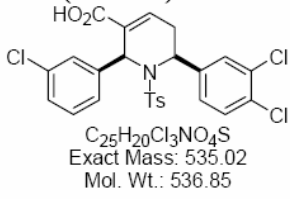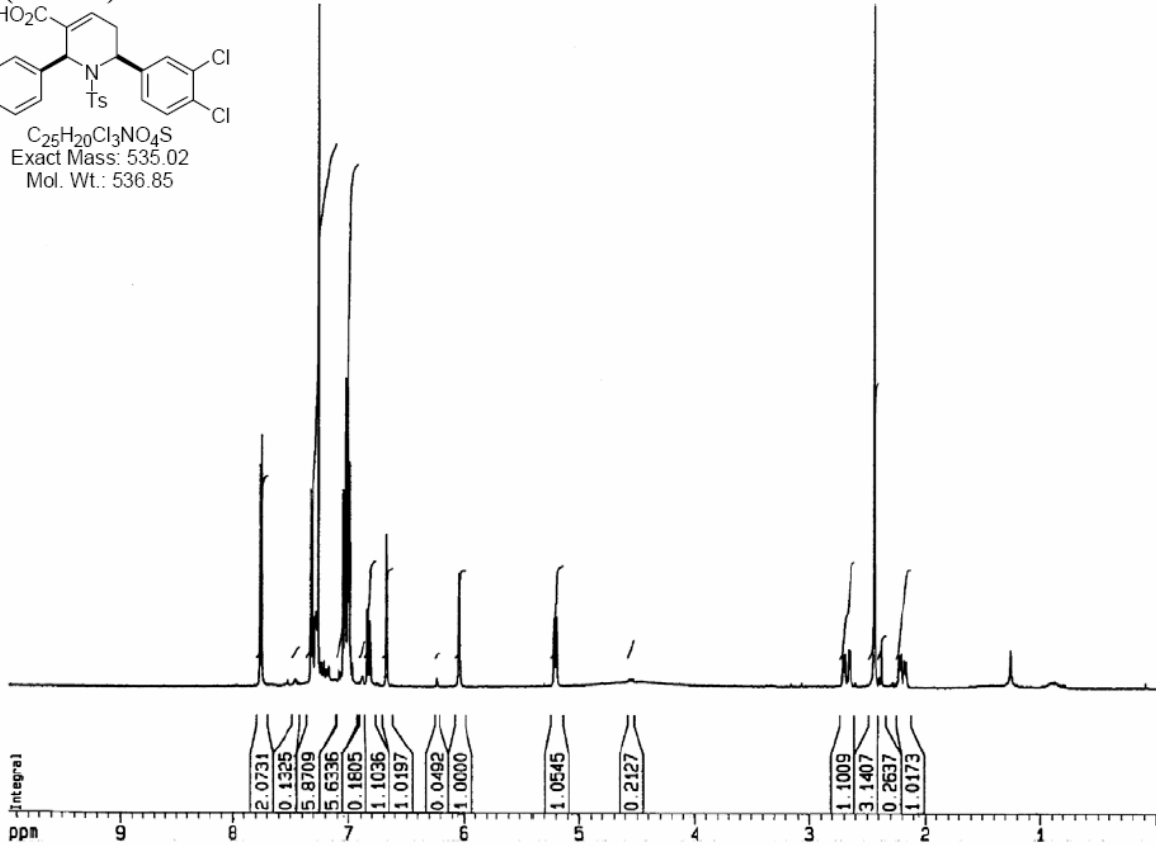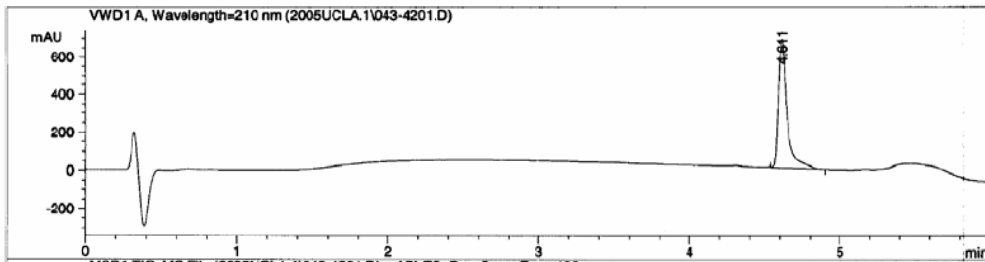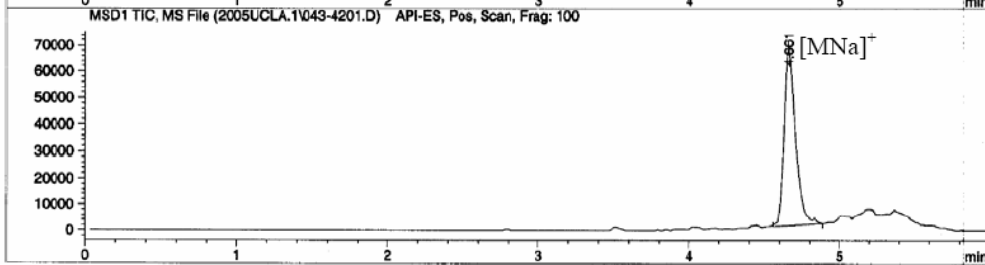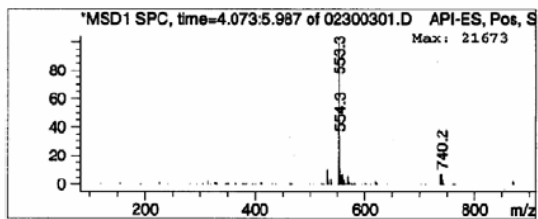



6-(4-Bromophenyl)-2-(3-chlorophenyl)-1-(4-toluenesulfonyl)-1,2,5,6-tetrahydropyridine-3-carboxylic acid (B05C14)

Not included

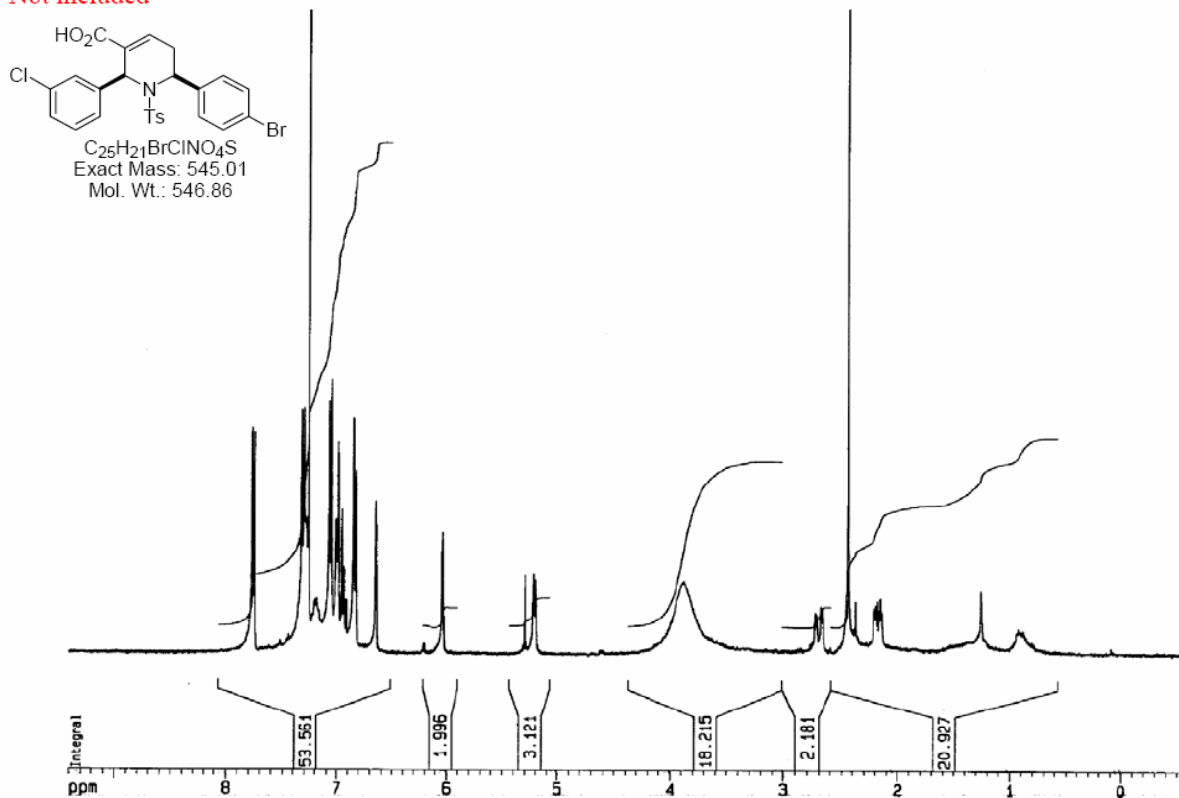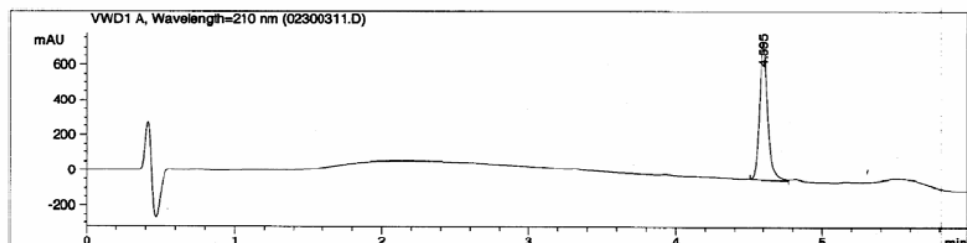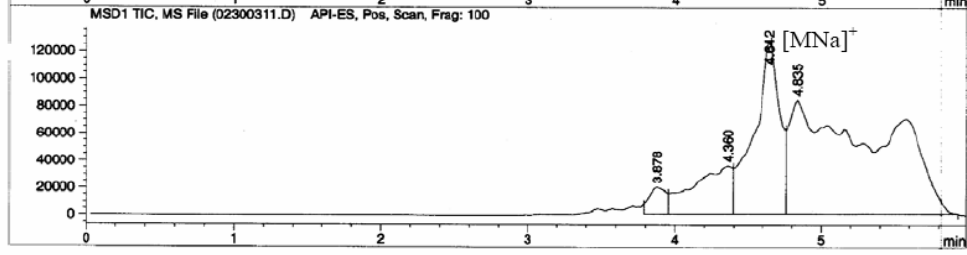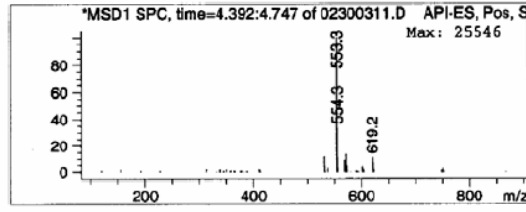

Component 3: Peak at Scan 261.3. Top ions are 553 570 568

6-(3-Bromophenyl)-2-(3-chlorophenyl)-1-(4-toluenesulfonyl)-1,2,5,6-tetrahydropyridine-3-carboxylic acid (B05C15)

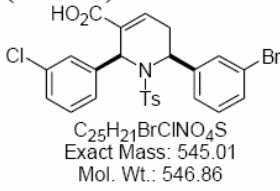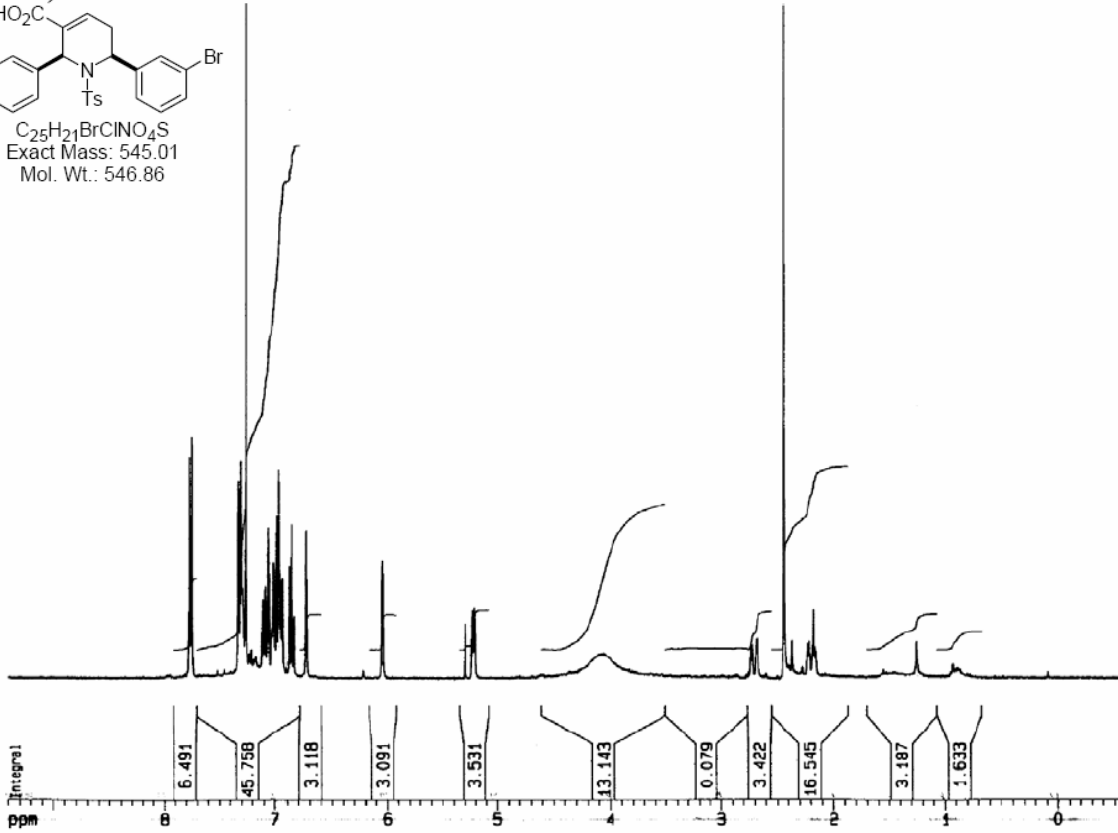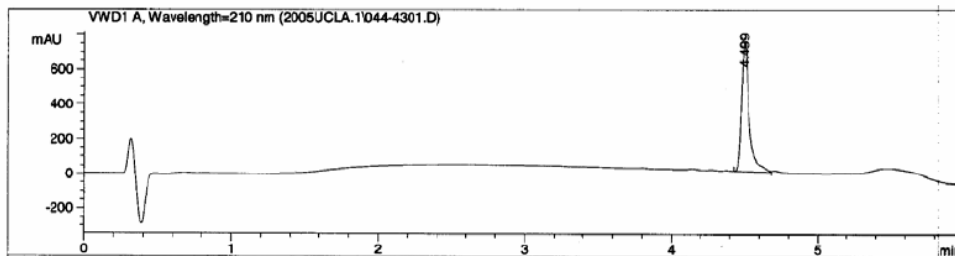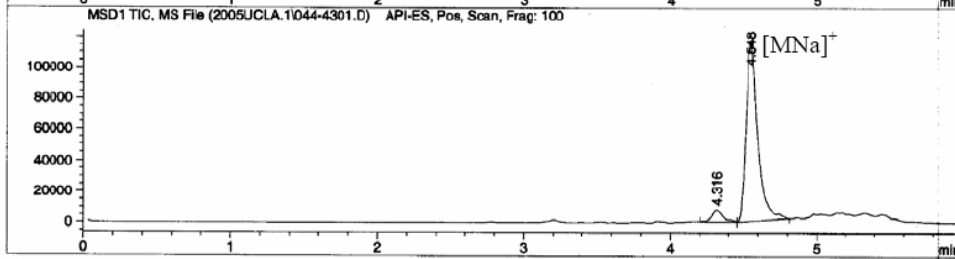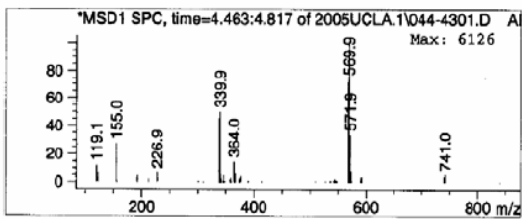

2-(3-Chlorophenyl)-6-(naphthalen-1-yl)-1-(4-toluenesulfonyl)-1,2,5,6-tetrahydropyridine-3-carboxylic acid (B05C16)

Not included, different product formed

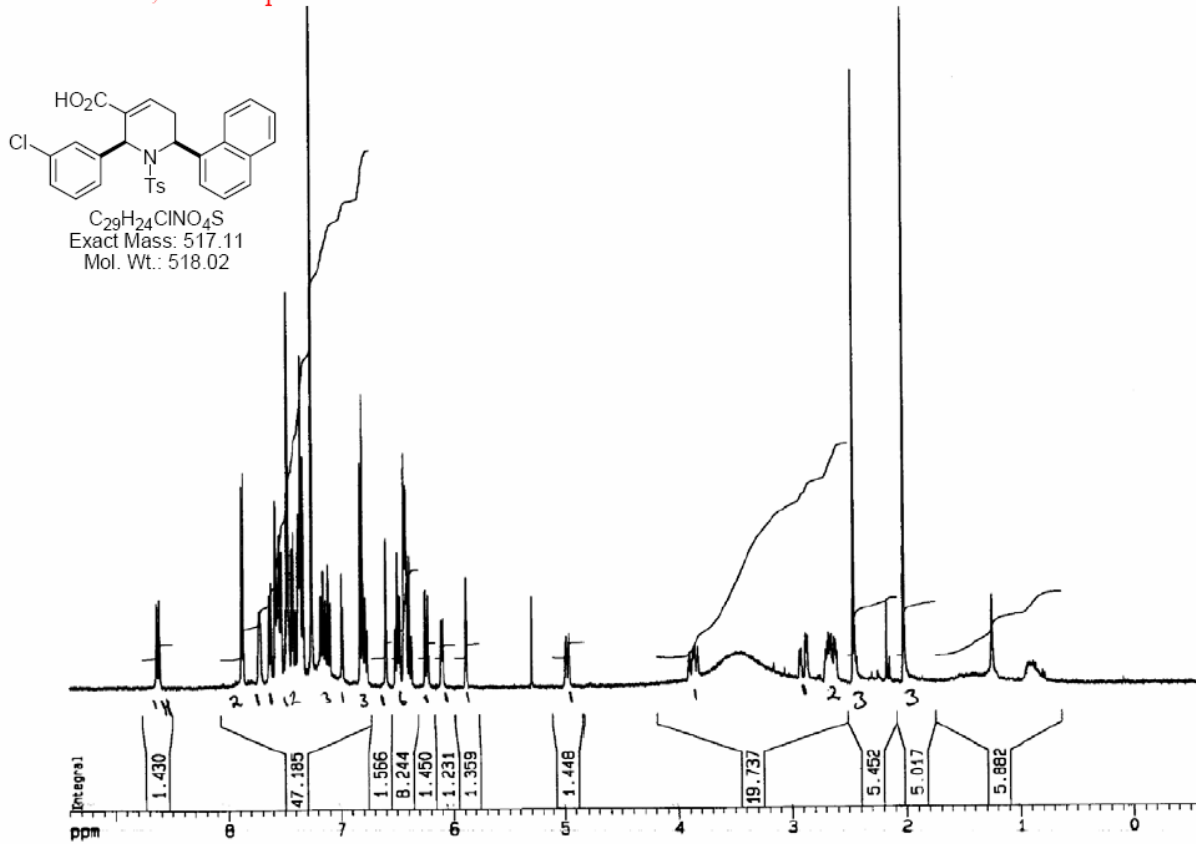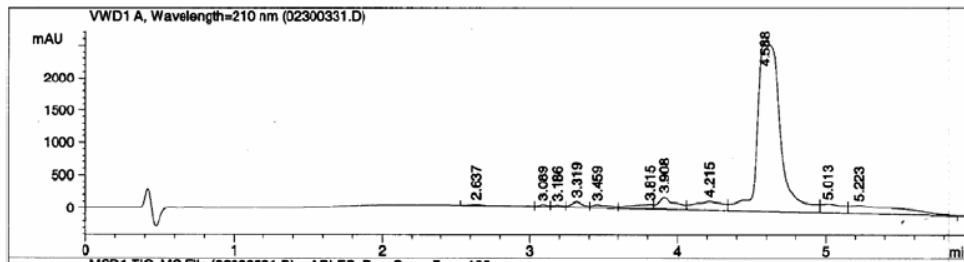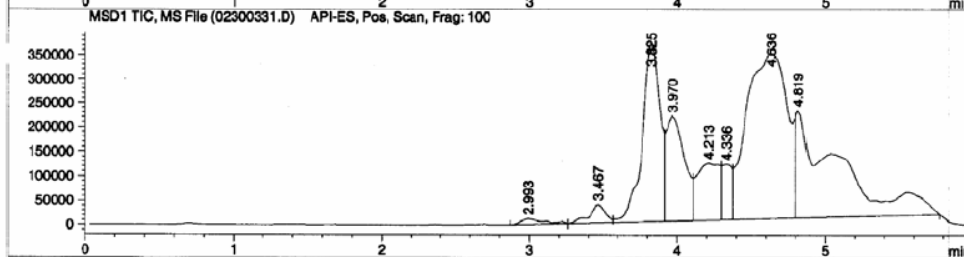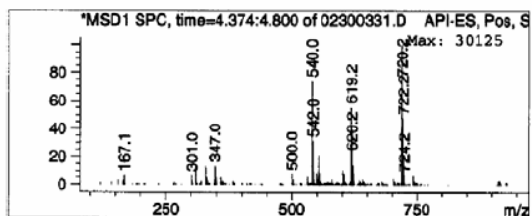

2-(3-Chlorophenyl)-1-(4-nitrobenzenesulfonyl)-6-phenyl-1,2,5,6-tetrahydropyridine-3-carboxylic acid (B05C18)

Not included

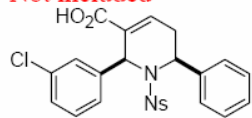

C<sub>24</sub>H<sub>19</sub>ClN<sub>2</sub>O<sub>6</sub>S  
Exact Mass: 498.07  
Mol. Wt.: 498.94

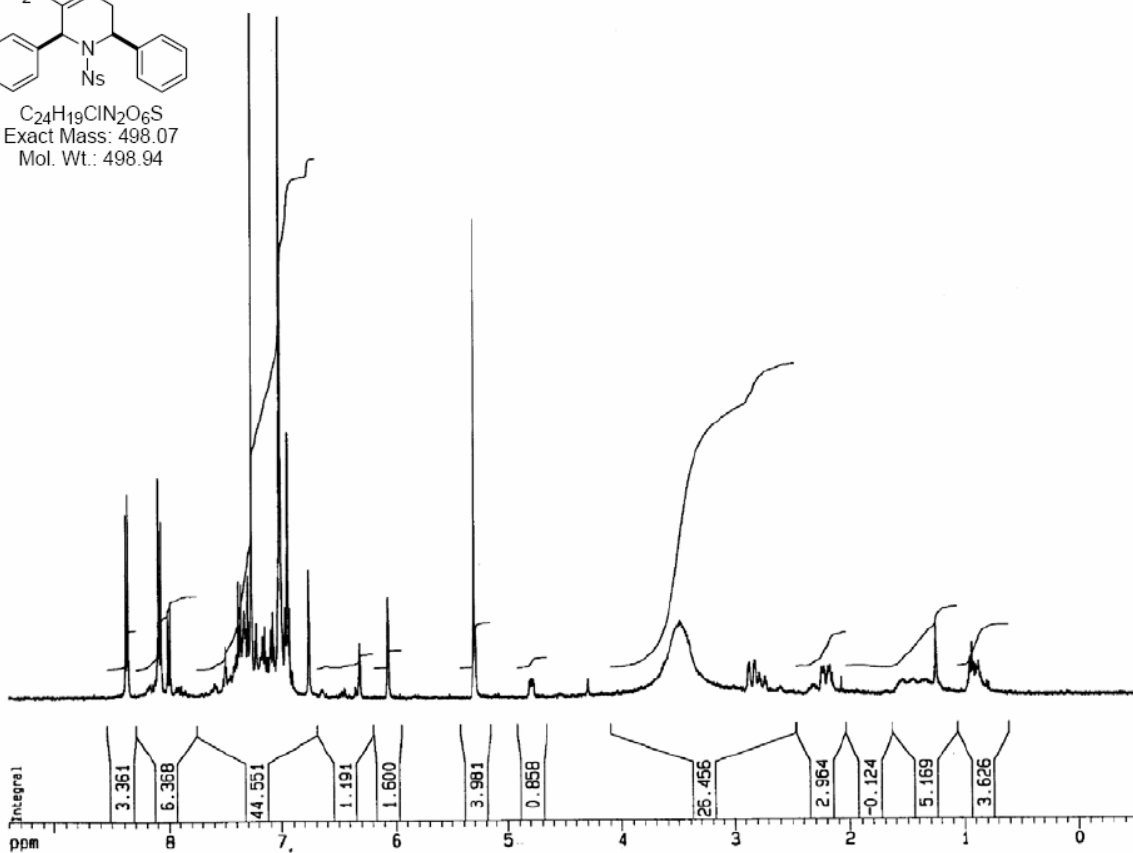

2-(3-Chlorophenyl)-1-methanesulfonyl-6-phenyl-1,2,5,6-tetrahydropyridine-3-carboxylic acid (B05C19)

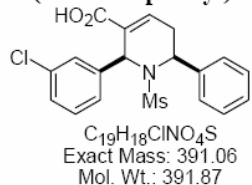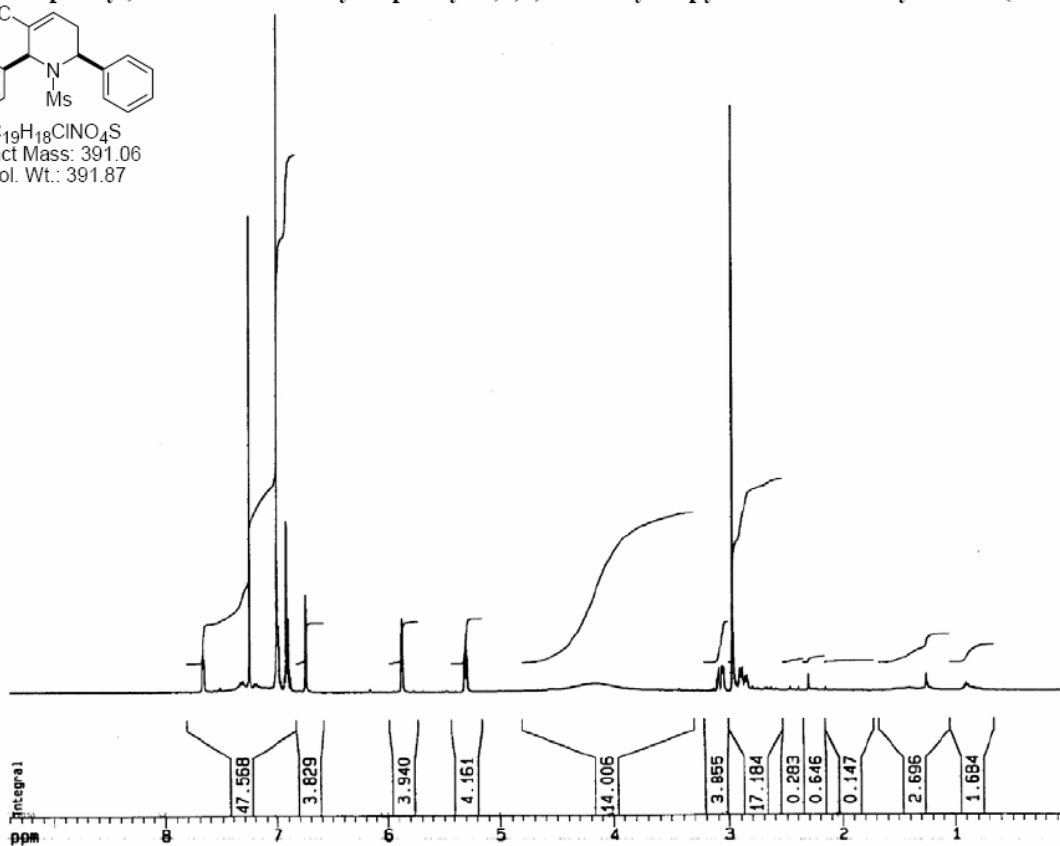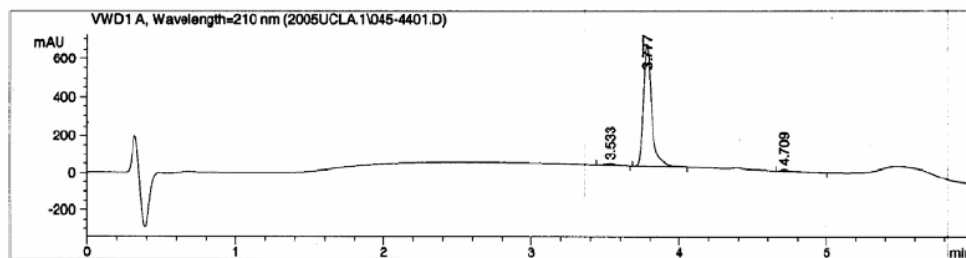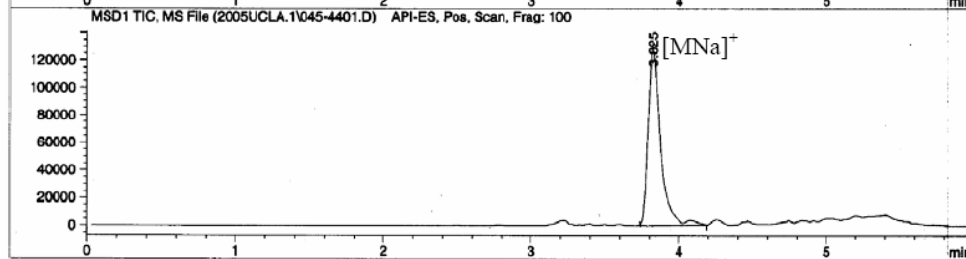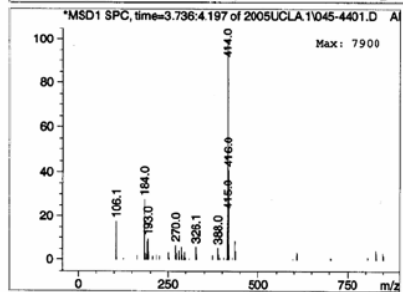

**2-(3-Chlorophenyl)-6-(3,4-dimethoxyphenyl)-1-(4-toluenesulfonyl)-1,2,5,6-tetrahydropyridine-3-carboxylic acid (B05C20)**

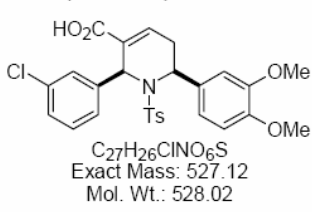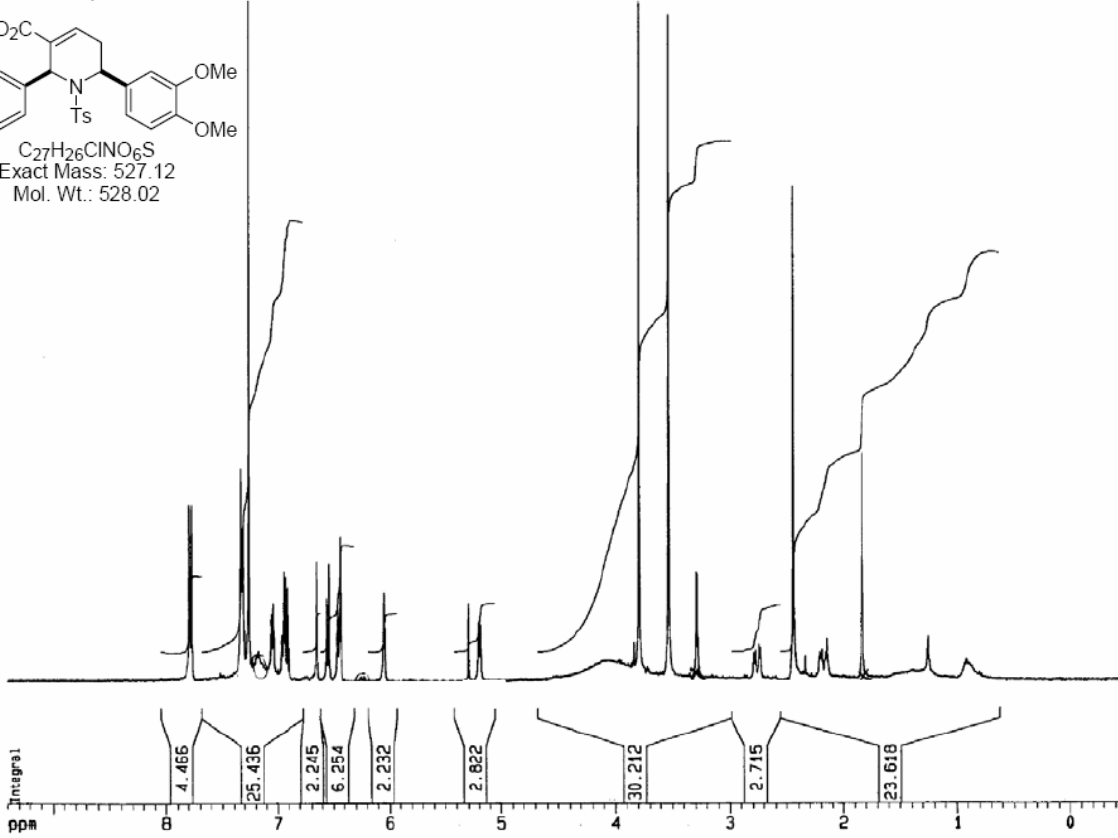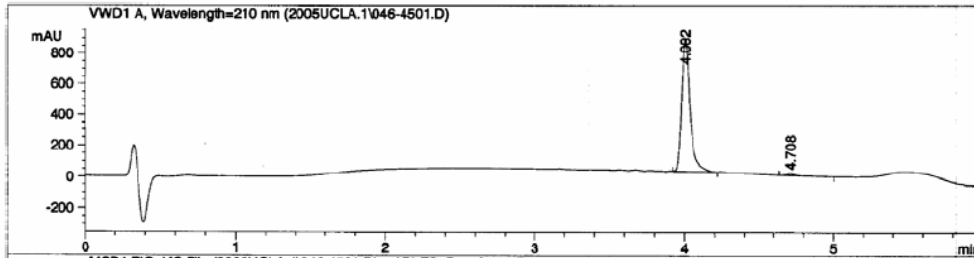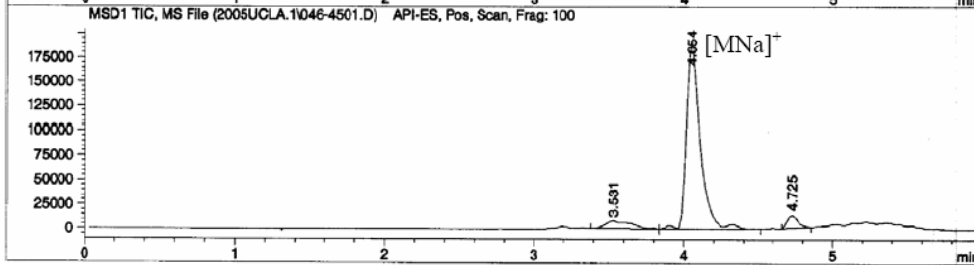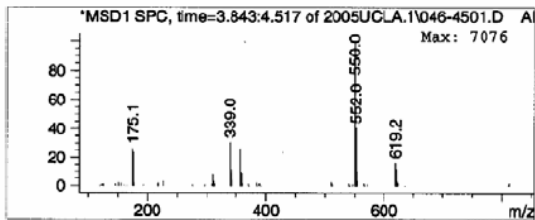

**2-(3-Chlorophenyl)-6-(thiophen-2-yl)-1-(4-toluenesulfonyl)-1,2,5,6-tetrahydropyridine-3-carboxylic acid (B05C21)**

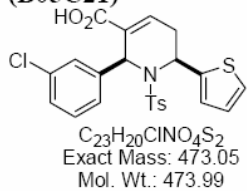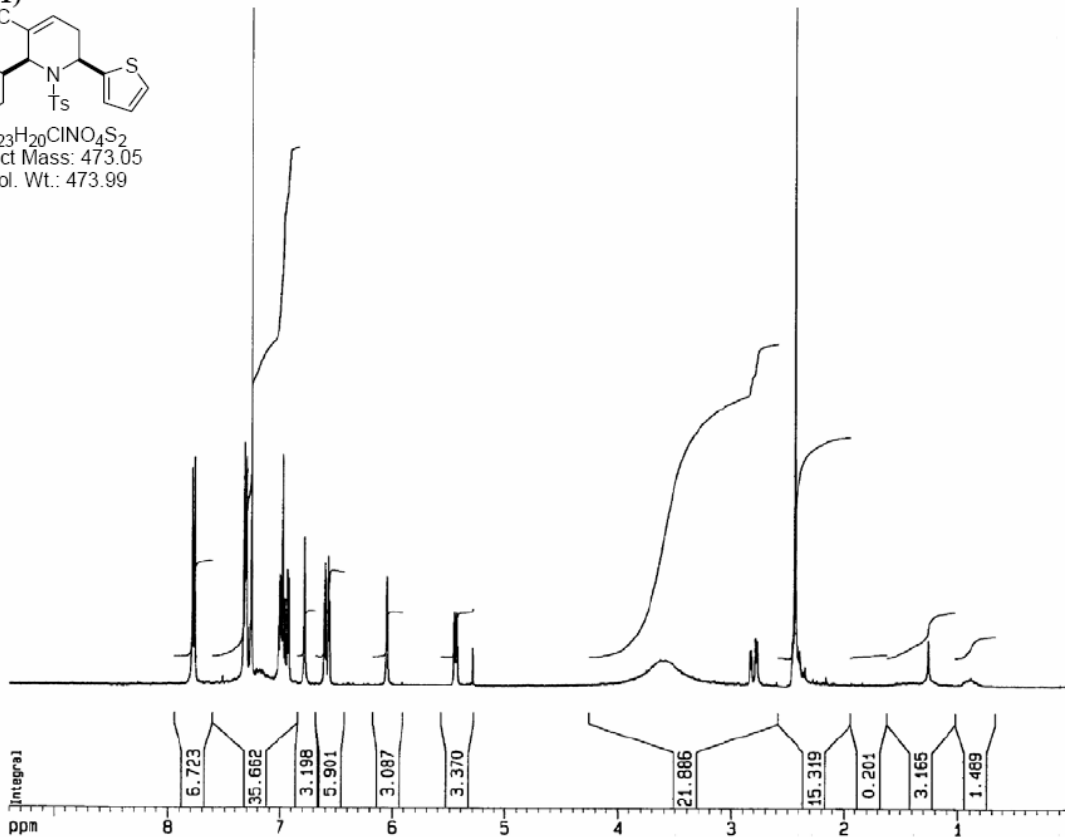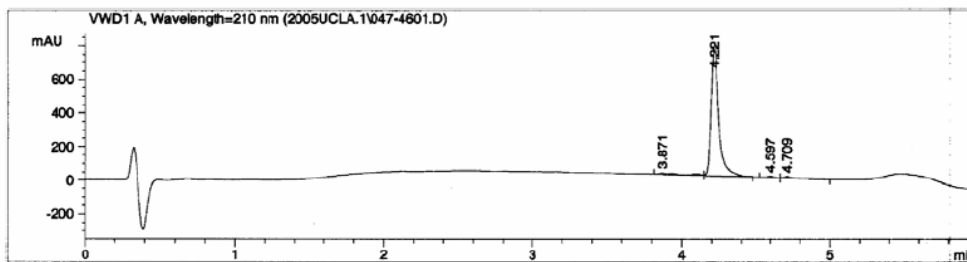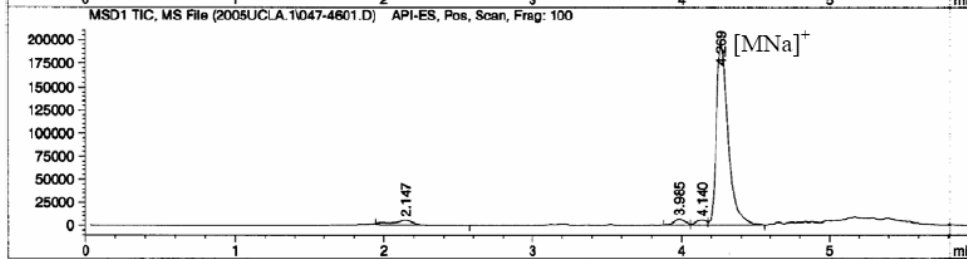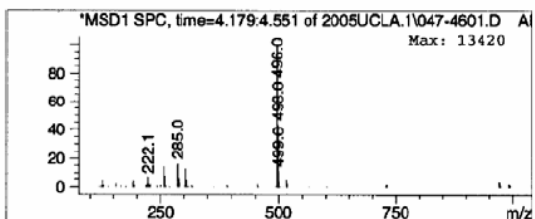

**2-(3-Chlorophenyl)-6-(4-fluorophenyl)-1-(4-toluenesulfonyl)-1,2,5,6-tetrahydropyridine-3-carboxylic acid (B05C23)**

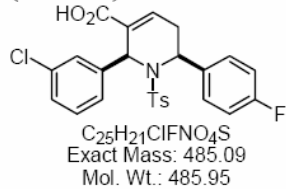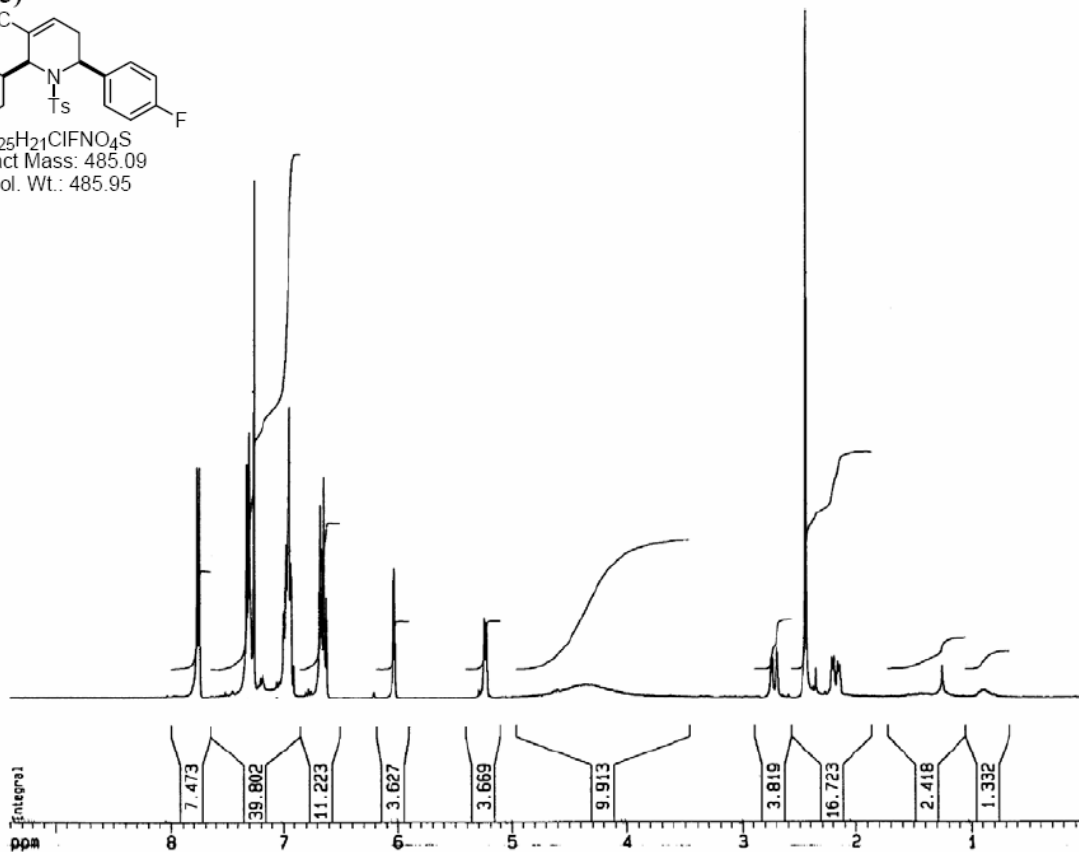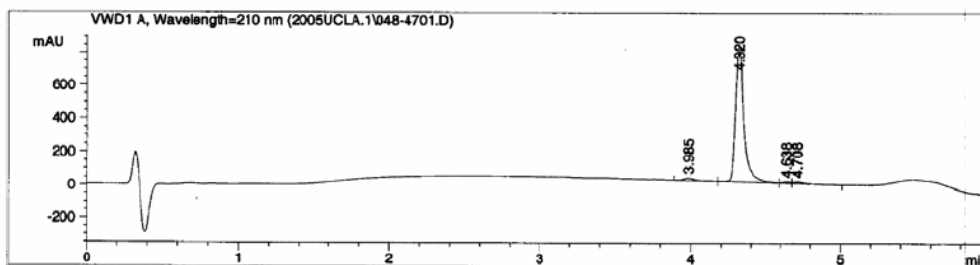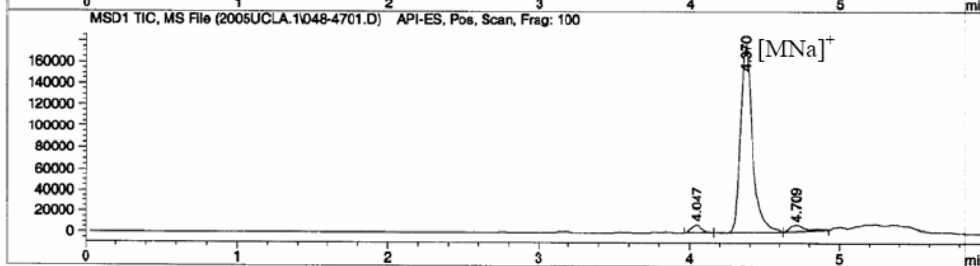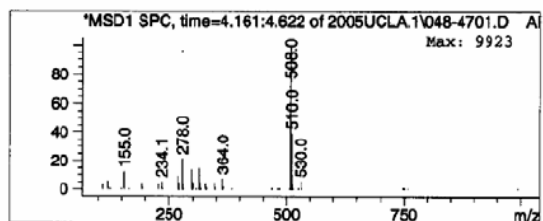



**2-(3-Chlorophenyl)-6-(4-isopropylphenyl)-1-(4-toluenesulfonyl)-1,2,5,6-tetrahydropyridine-3-carboxylic acid (B05C24)**

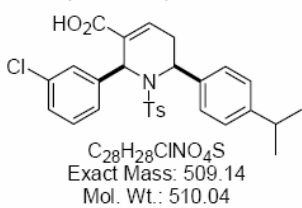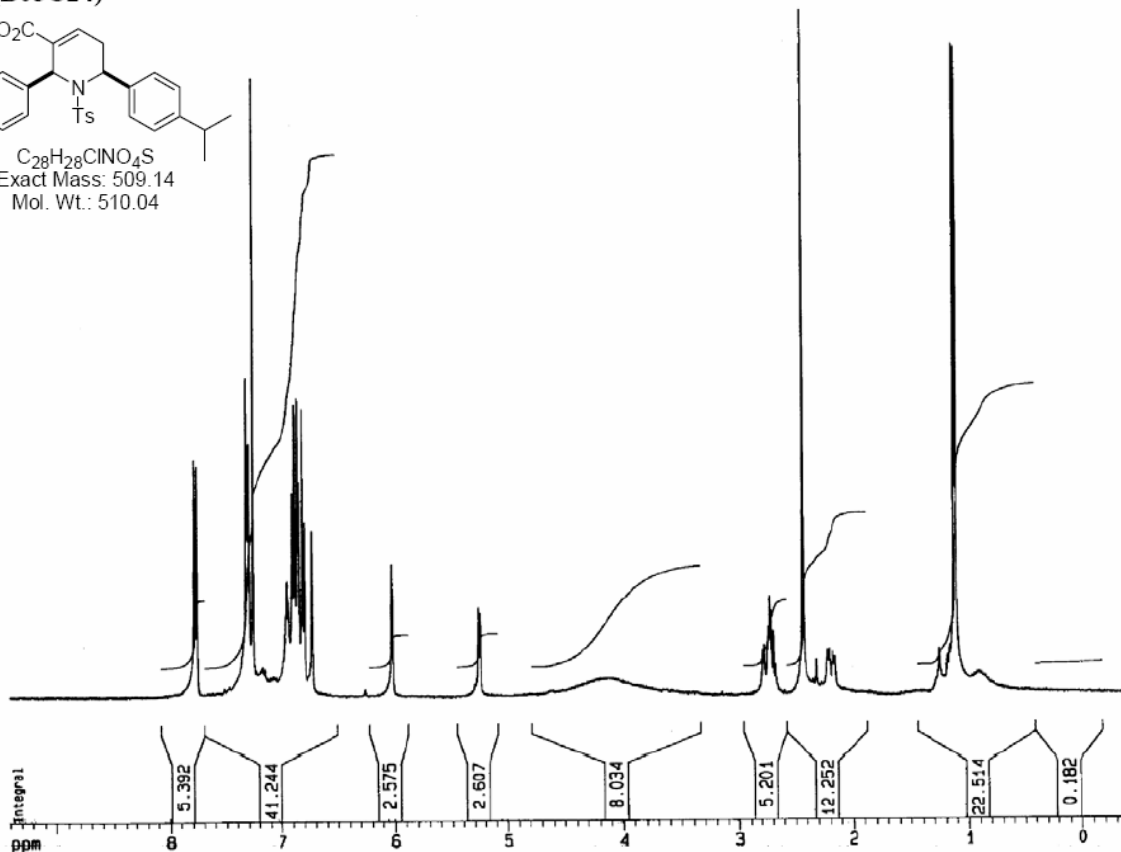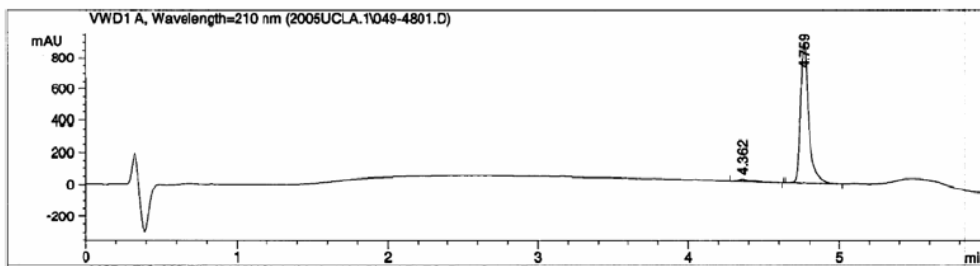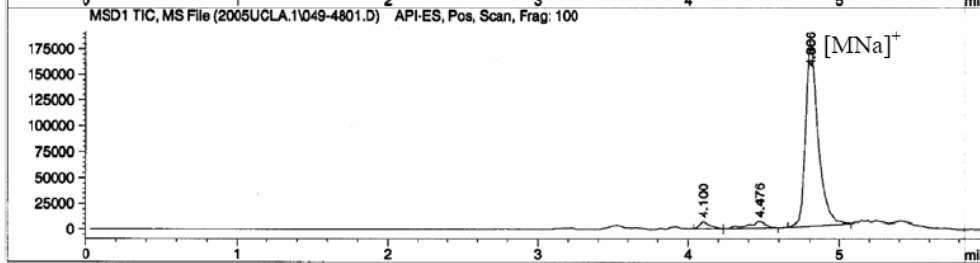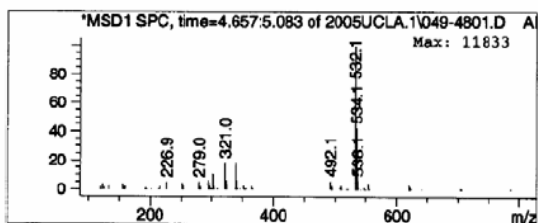

**2-(3-Chlorophenyl)-1-(4-toluenesulfonyl)-6-(3,4,5-trimethoxyphenyl)-1,2,5,6-tetrahydropyridine-3-carboxylic acid (B05C25)**

Not included

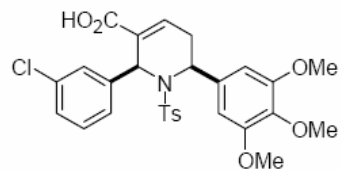

$C_{28}H_{28}ClNO_7S$   
Exact Mass: 557.13  
Mol. Wt.: 558.04

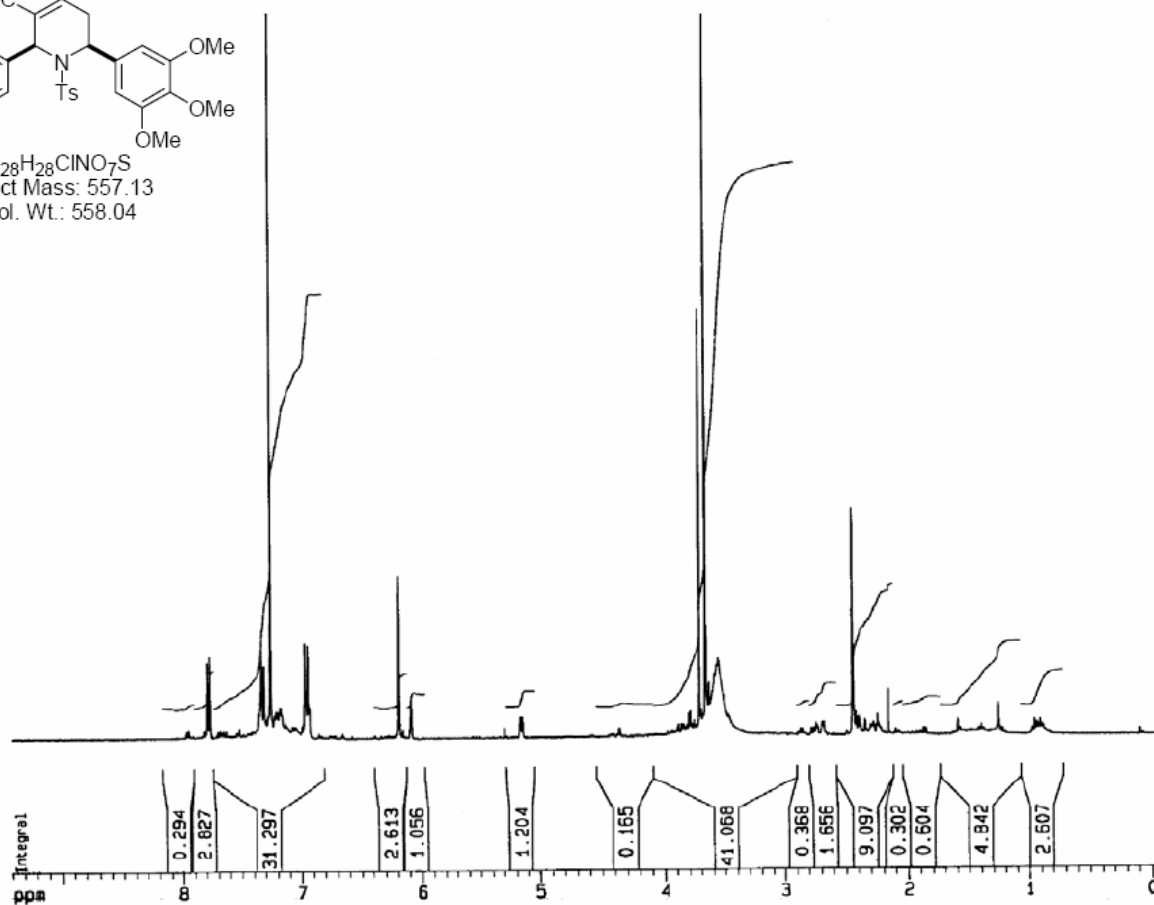

**2-(3-Chlorophenyl)-6-(3-fluorophenyl)-1-(4-toluenesulfonyl)-1,2,5,6-tetrahydropyridine-3-carboxylic acid (B05C26)**

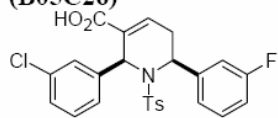

C<sub>25</sub>H<sub>21</sub>ClFNO<sub>4</sub>S  
 Exact Mass: 485.09  
 Mol. Wt.: 485.95

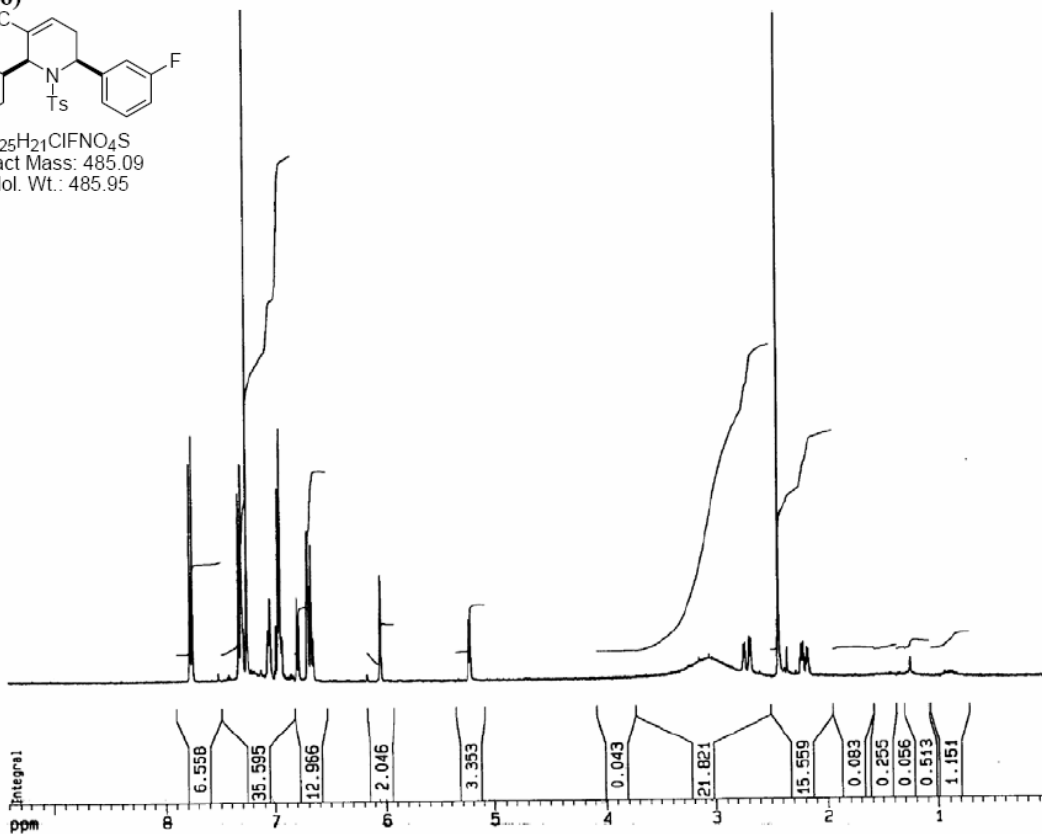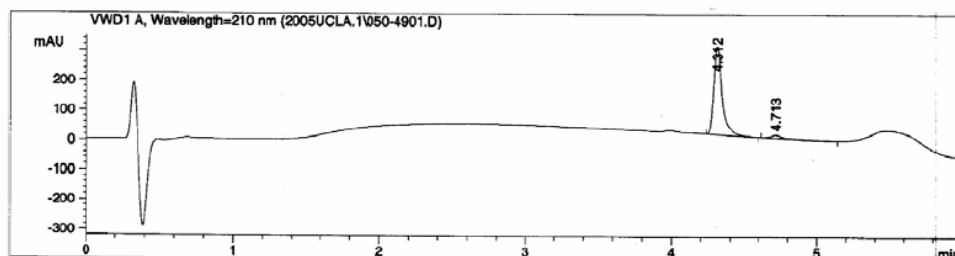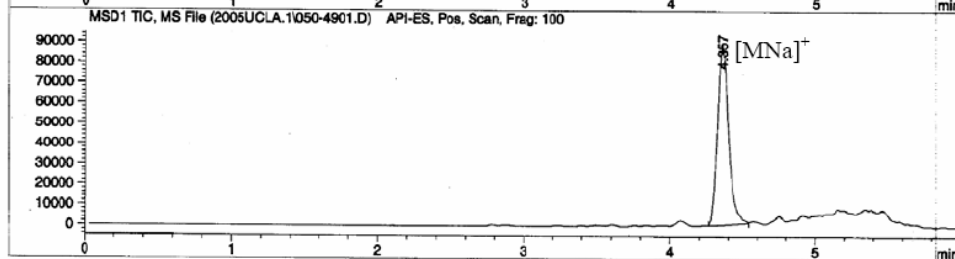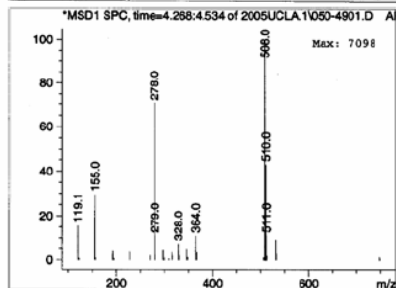

**1-(4-Chlorobenzenesulfonyl)-6-(4-chlorophenyl)-2-(3-chlorophenyl)-1,2,5,6-tetrahydropyridine-3-carboxylic acid (B05C27)**

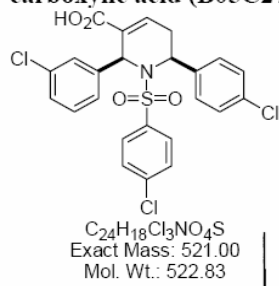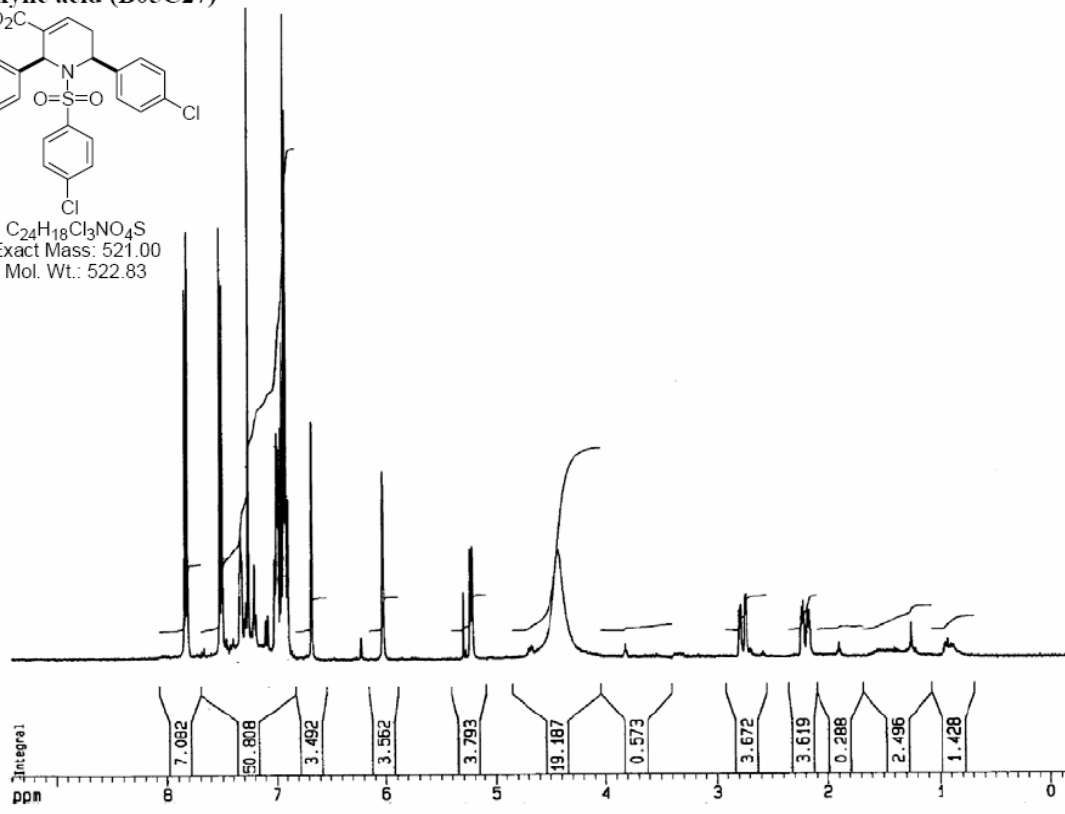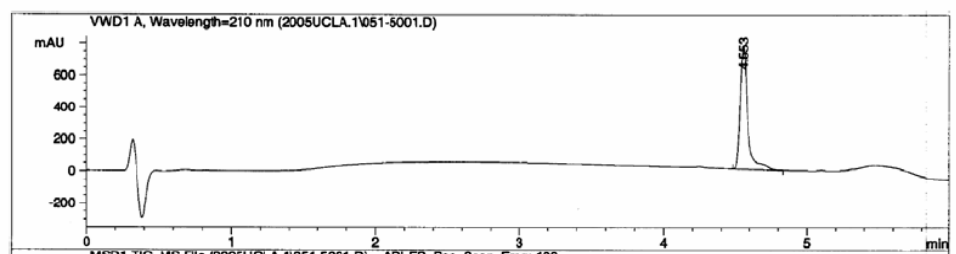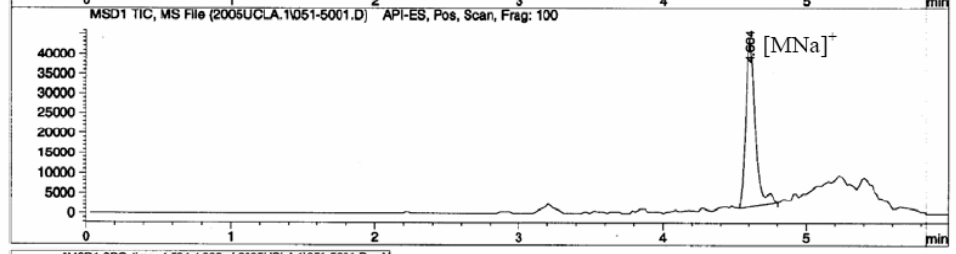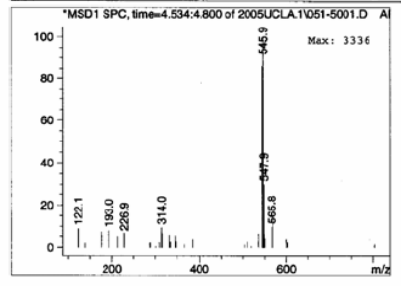

Component 2: Peak at Scan 258.9. Top ions are 546 544 548

6-(4-Chlorophenyl)-2-(3-chlorophenyl)-1-methanesulfonyl-1,2,5,6-tetrahydropyridine-3-carboxylic acid (B05C28)

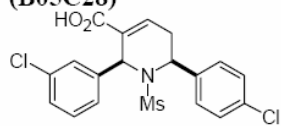

C<sub>19</sub>H<sub>17</sub>Cl<sub>2</sub>NO<sub>4</sub>S  
 Exact Mass: 425.03  
 Mol. Wt.: 426.31

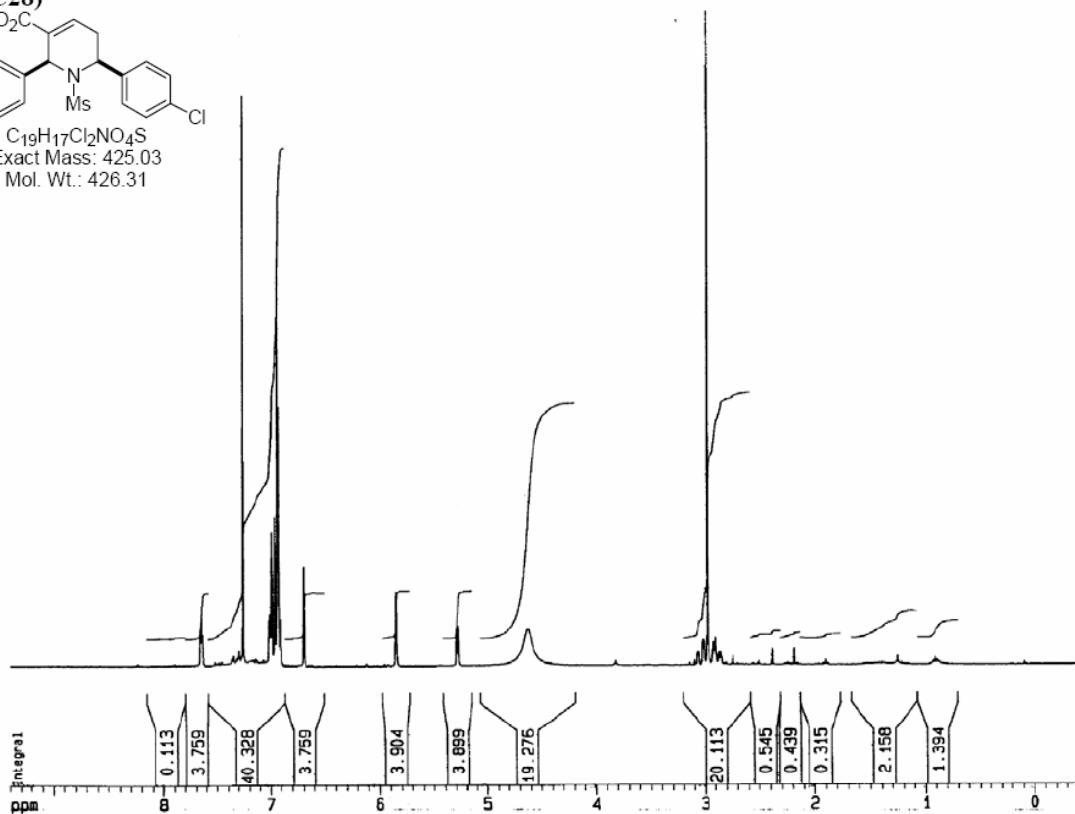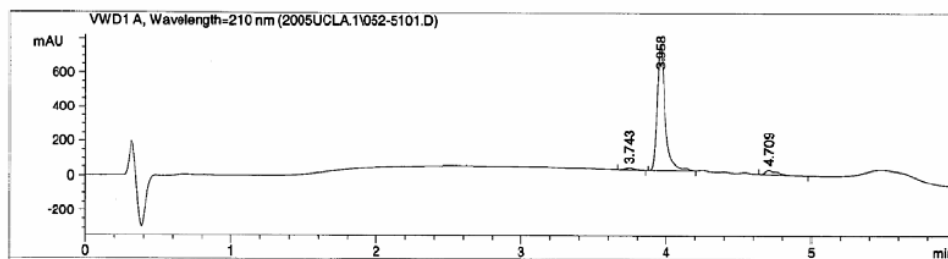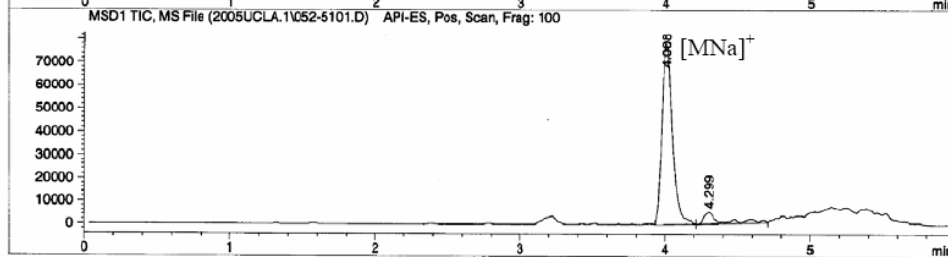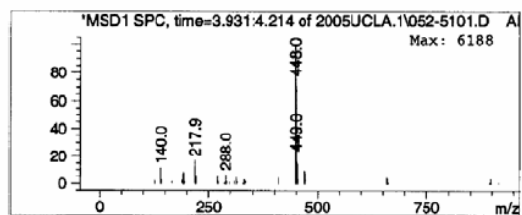

**1-Benzenesulfonyl-6-(4-chlorophenyl)-2-(3-chlorophenyl)-1,2,5,6-tetrahydropyridine-3-carboxylic acid (B05C29)**

Not included

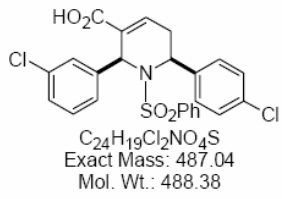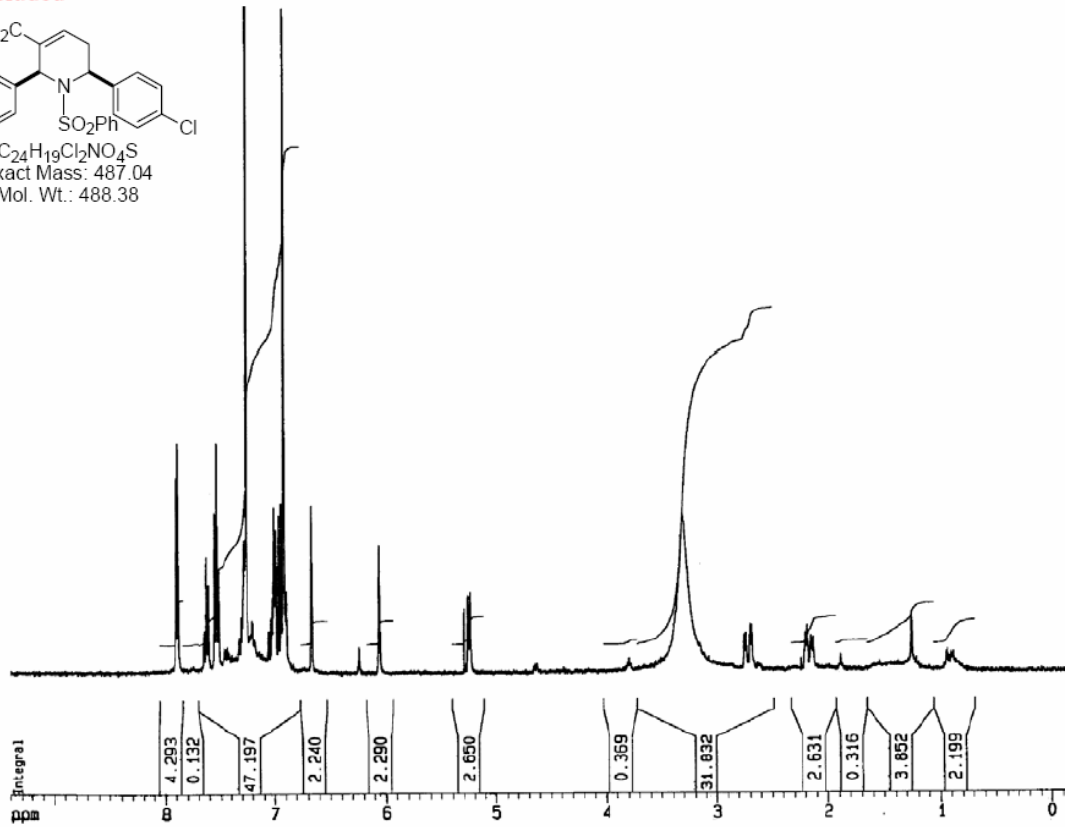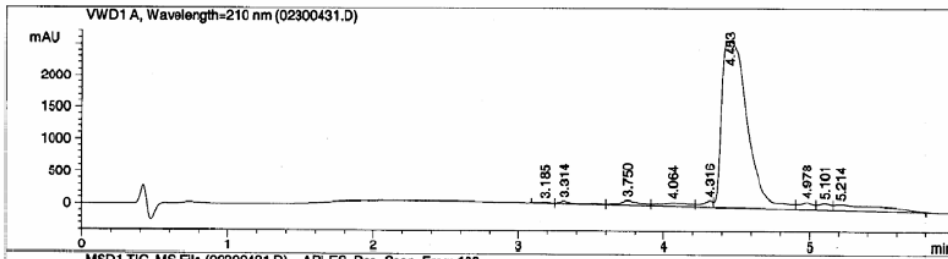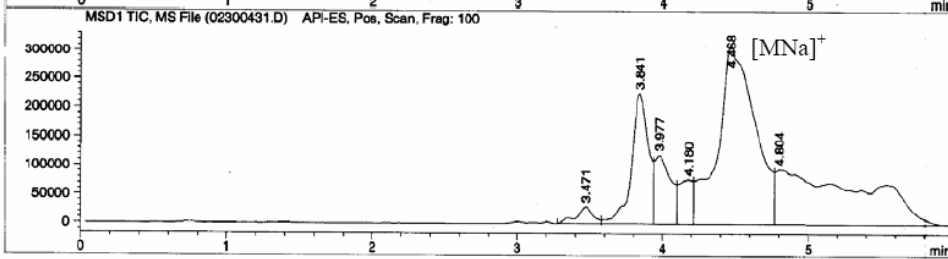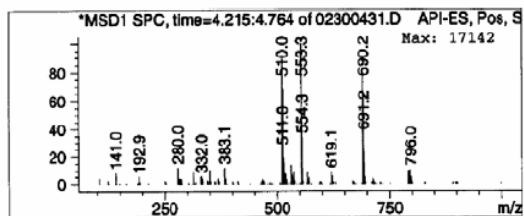

**1-(4-Chlorobenzenesulfonyl)-2-(3-chlorophenyl)-6-(p-tolyl)-1,2,5,6-tetrahydropyridine-3-carboxylic acid (B05C30)**

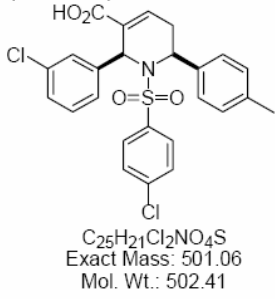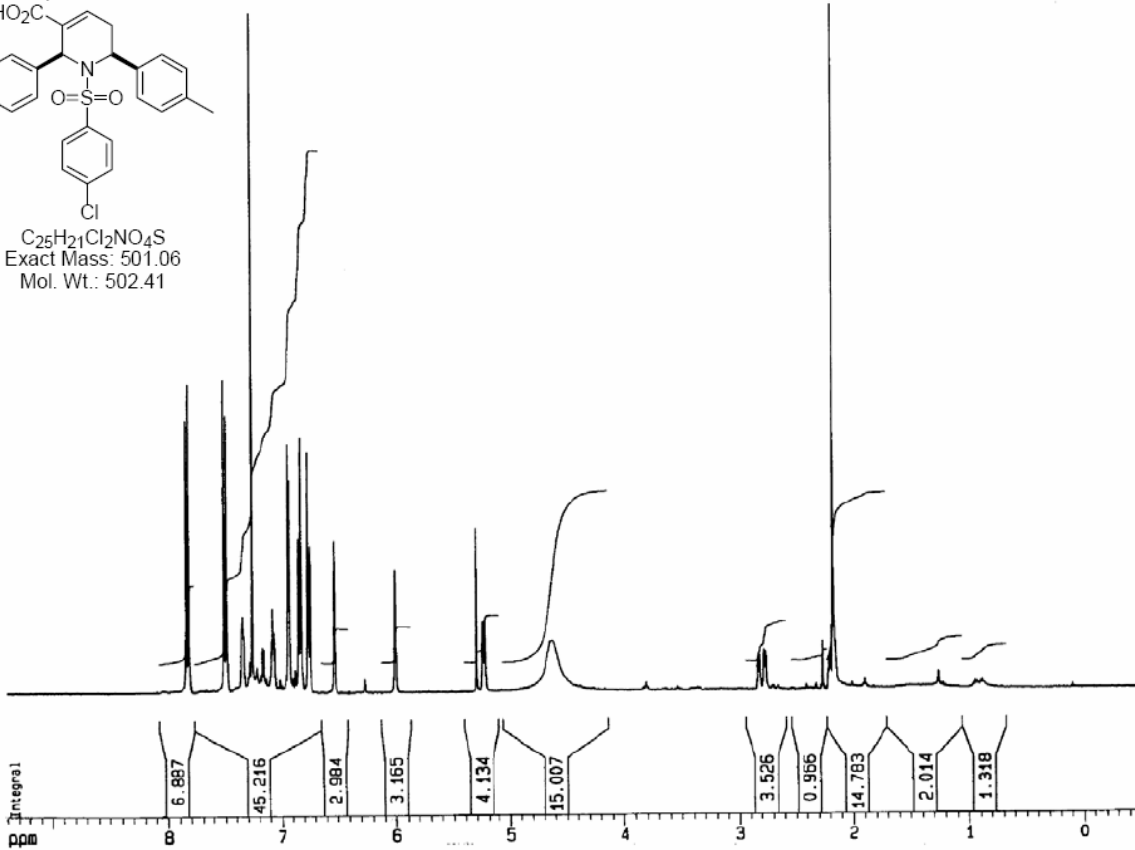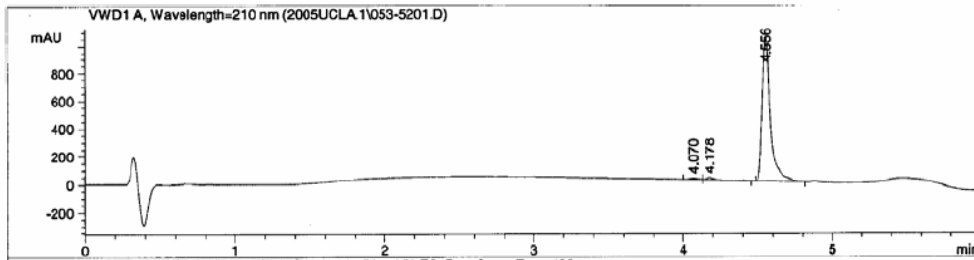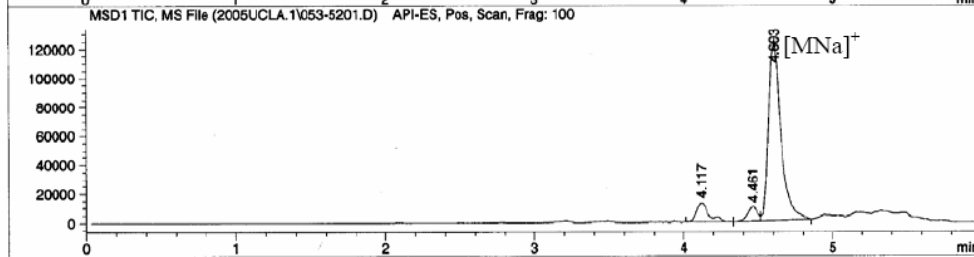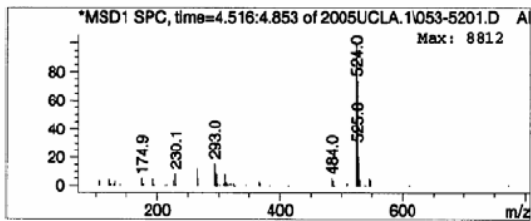

**6-(4-Chlorophenyl)-2-(3-chlorophenyl)-1-(2-methoxycarbonylbenzenesulfonyl)-1,2,5,6-tetrahydropyridine-3-carboxylic acid (B05C31)**

Not included

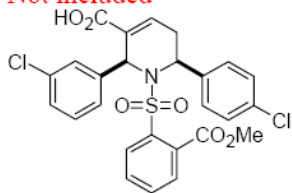

C<sub>26</sub>H<sub>21</sub>Cl<sub>2</sub>NO<sub>6</sub>S  
Exact Mass: 545.05  
Mol. Wt.: 546.42

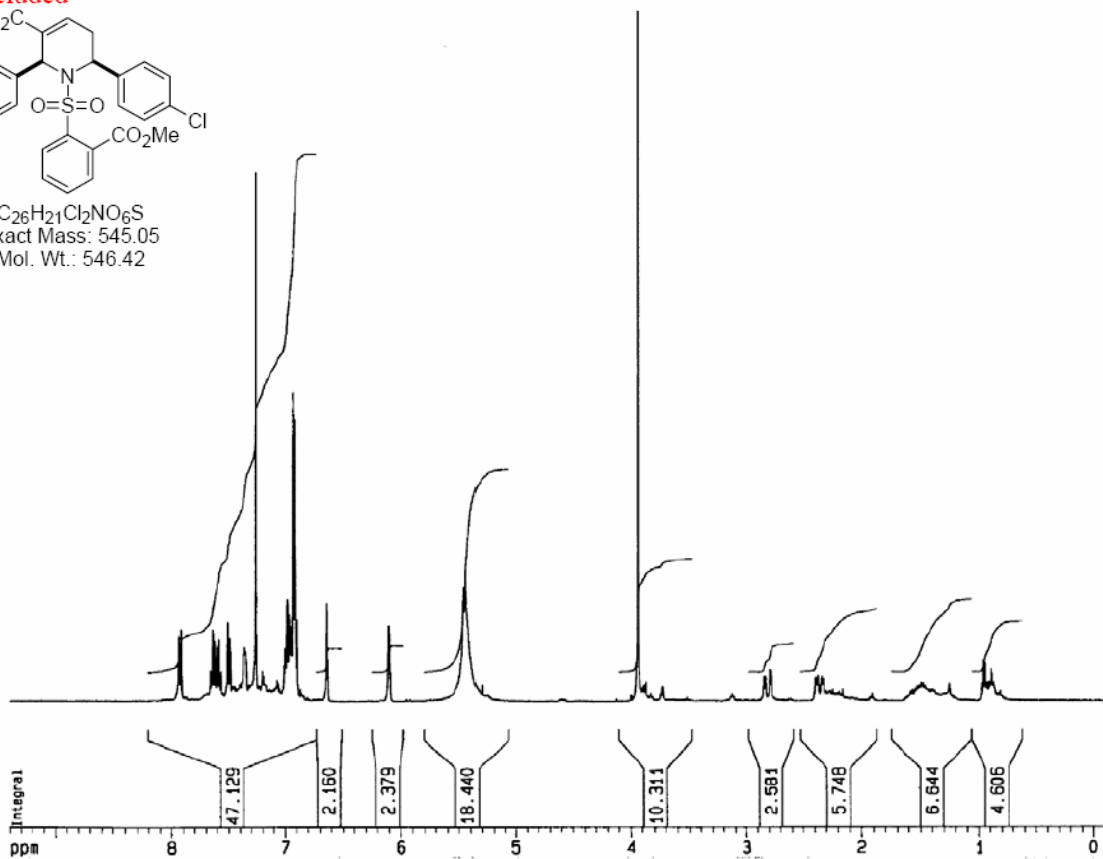



**2-(3-Chlorophenyl)-1-(4-toluenesulfonyl)-6-(*m*-tolyl)-1,2,5,6-tetrahydropyridine-3-carboxylic acid (B05C33)**

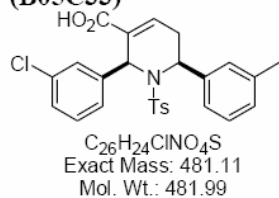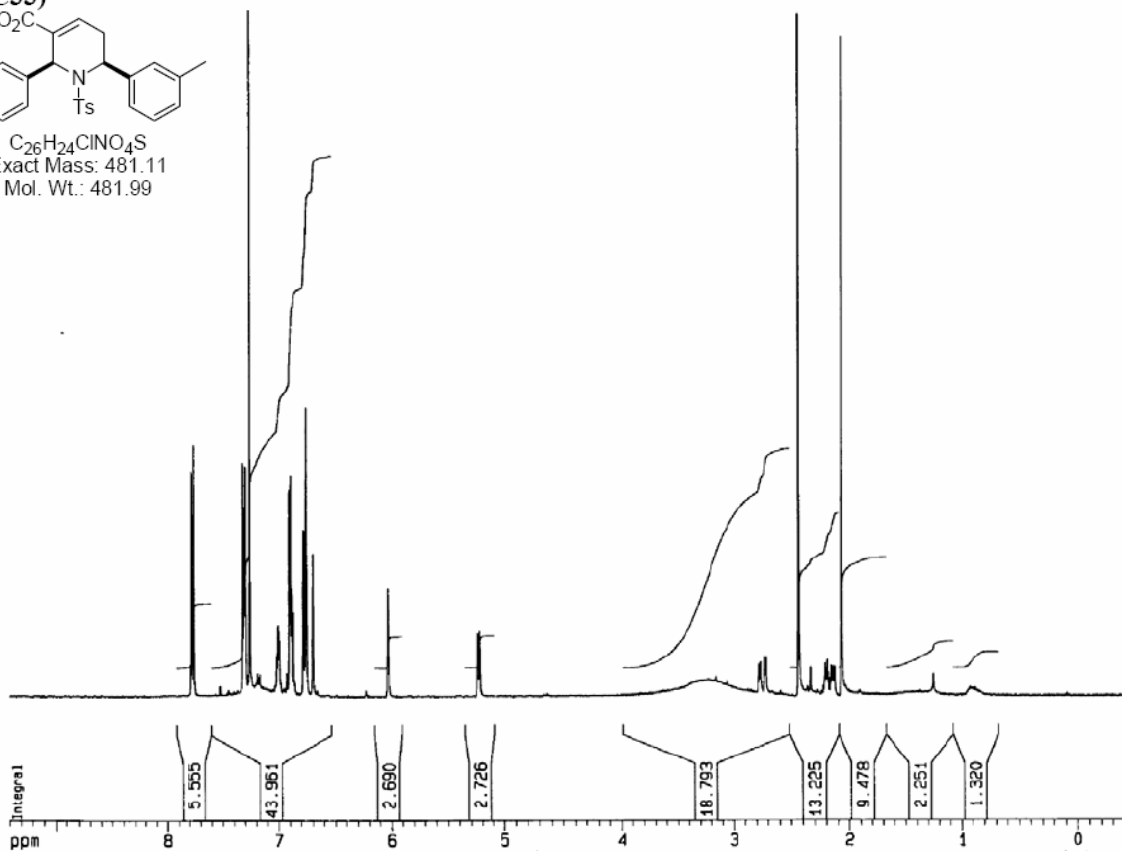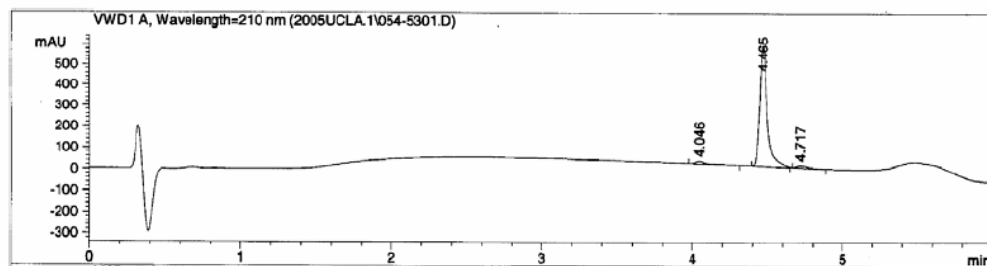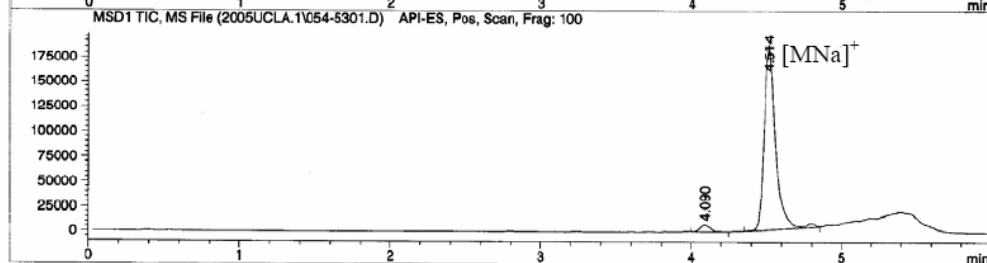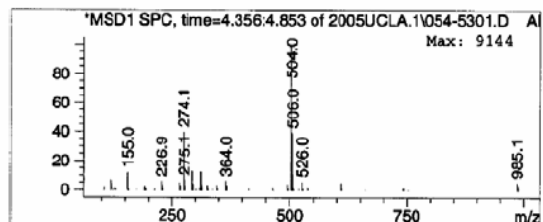

**2-(3-Chlorophenyl)-1-(2-methoxycarbonylbenzenesulfonyl)-6-(4-methoxyphenyl)-1,2,5,6-tetrahydropyridine-3-carboxylic acid (B05C34)**

Not included

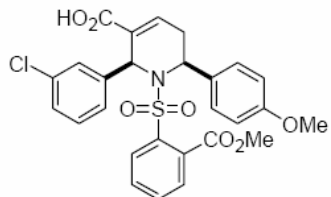

C<sub>27</sub>H<sub>24</sub>ClNO<sub>7</sub>S  
Exact Mass: 541.10  
Mol. Wt.: 542.00

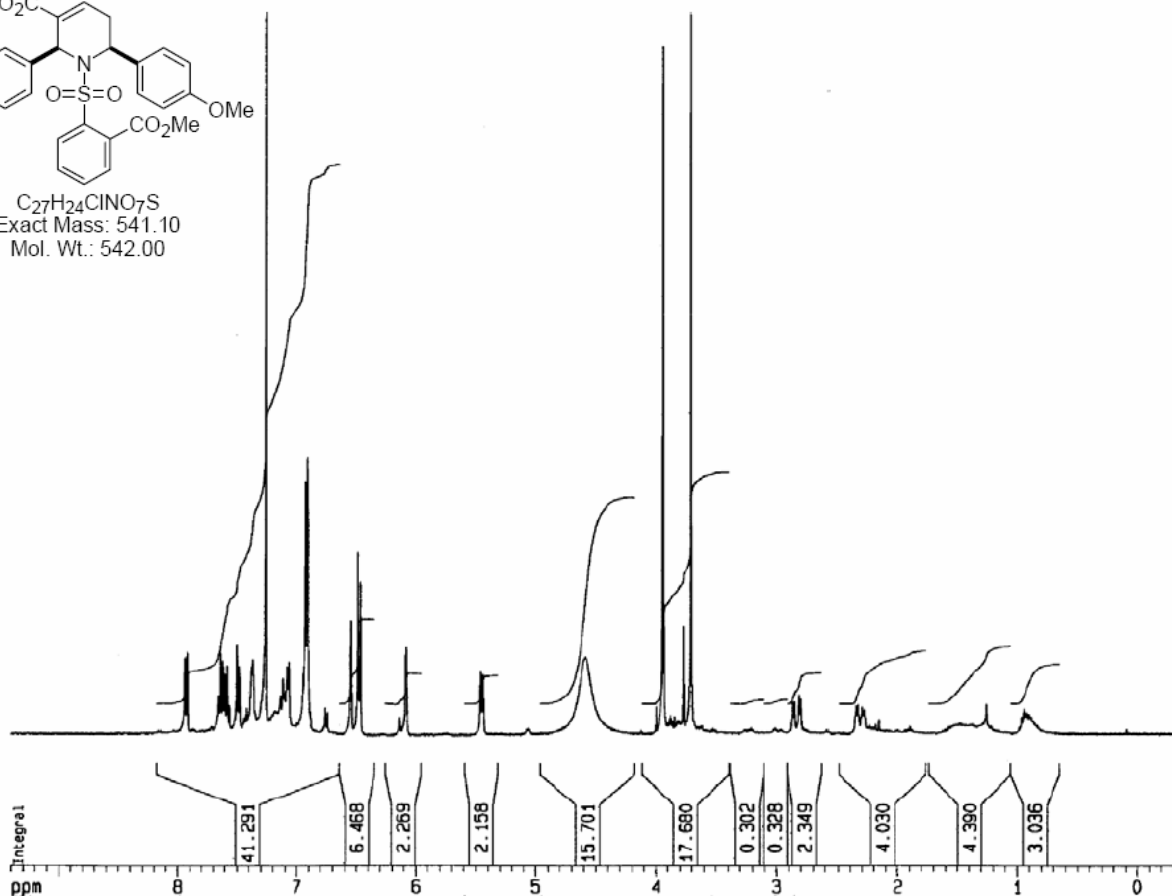

**1-Benzenesulfonyl-2-(3-chlorophenyl)-6-(4-methoxyphenyl)-1,2,5,6-tetrahydropyridine-3-carboxylic acid (B05C35)**

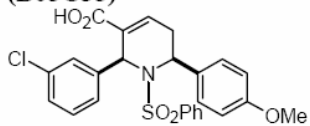

C<sub>25</sub>H<sub>22</sub>ClNO<sub>6</sub>S  
 Exact Mass: 483.09  
 Mol. Wt.: 483.96

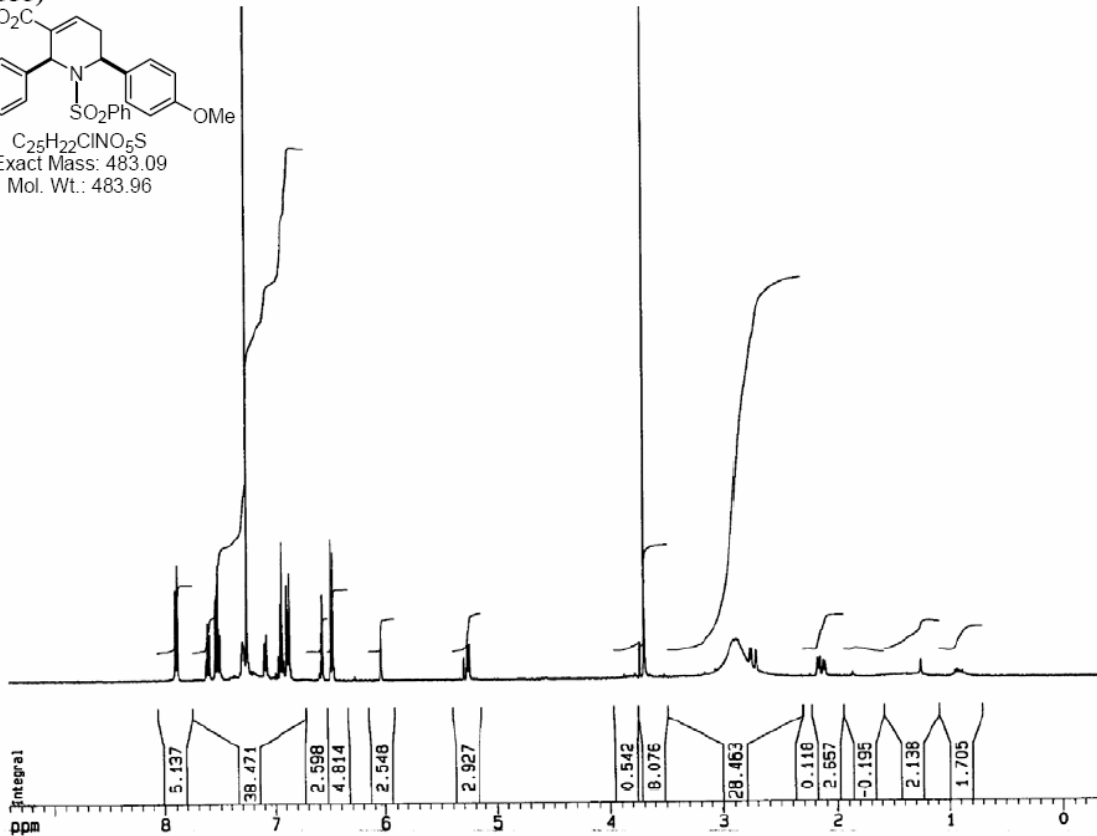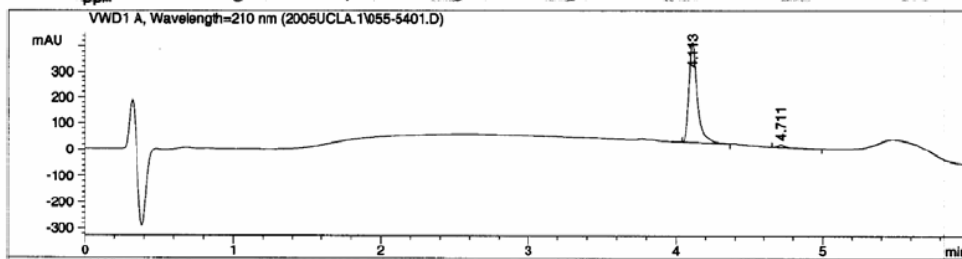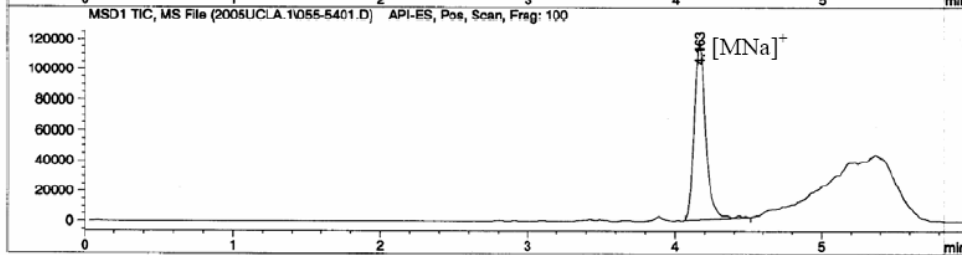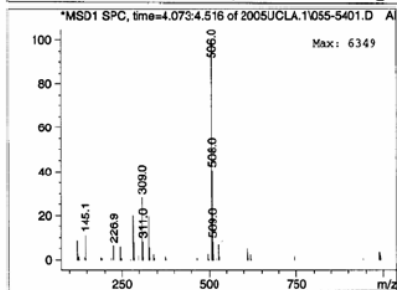

2-(3-Chlorophenyl)-1-(2-nitrobenzenesulfonyl)-6-(*p*-tolyl)-1,2,5,6-tetrahydropyridine-3-carboxylic acid (B05C36)

Not included

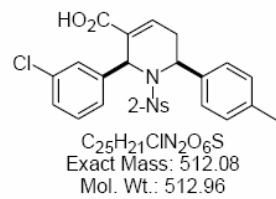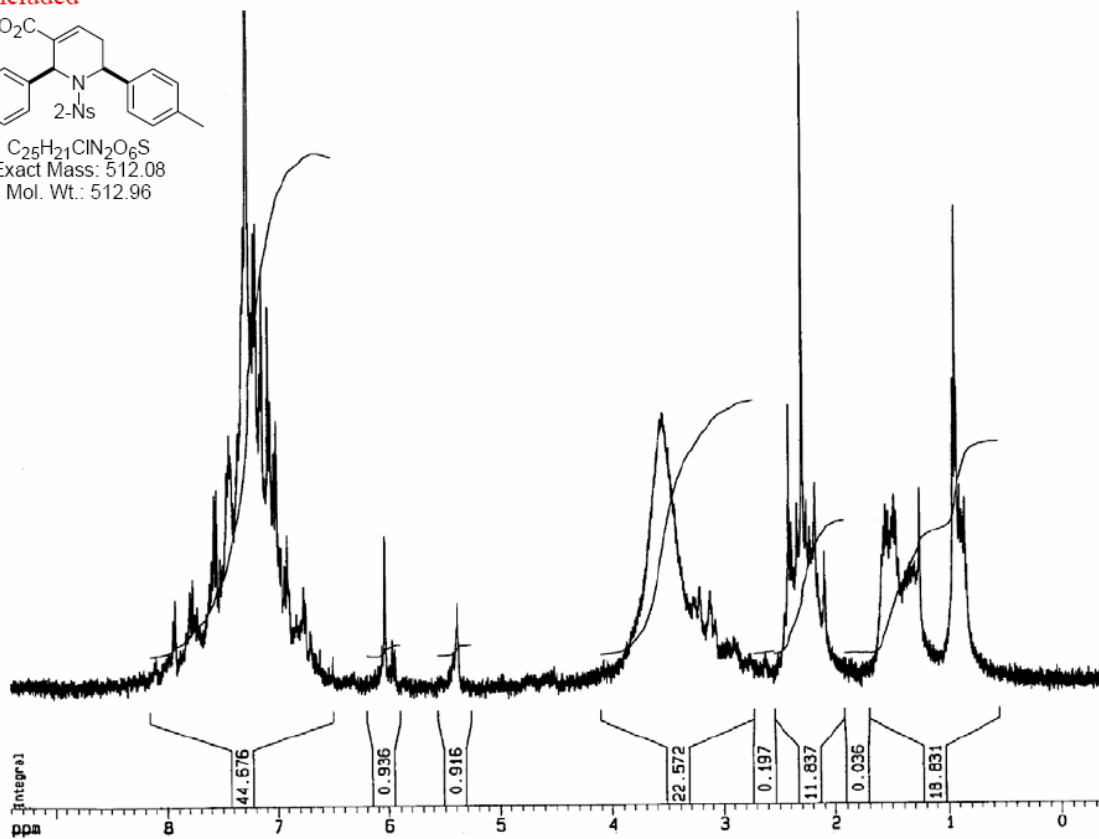

**1-(4-Chlorobenzenesulfonyl)-2-(3-chlorophenyl)-6-(4-methoxyphenyl)-1,2,5,6-tetrahydropyridine-3-carboxylic acid (B05C37)**

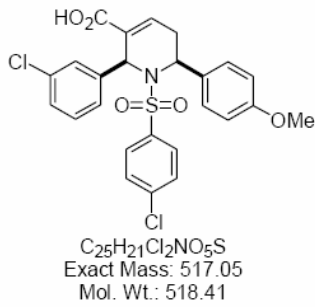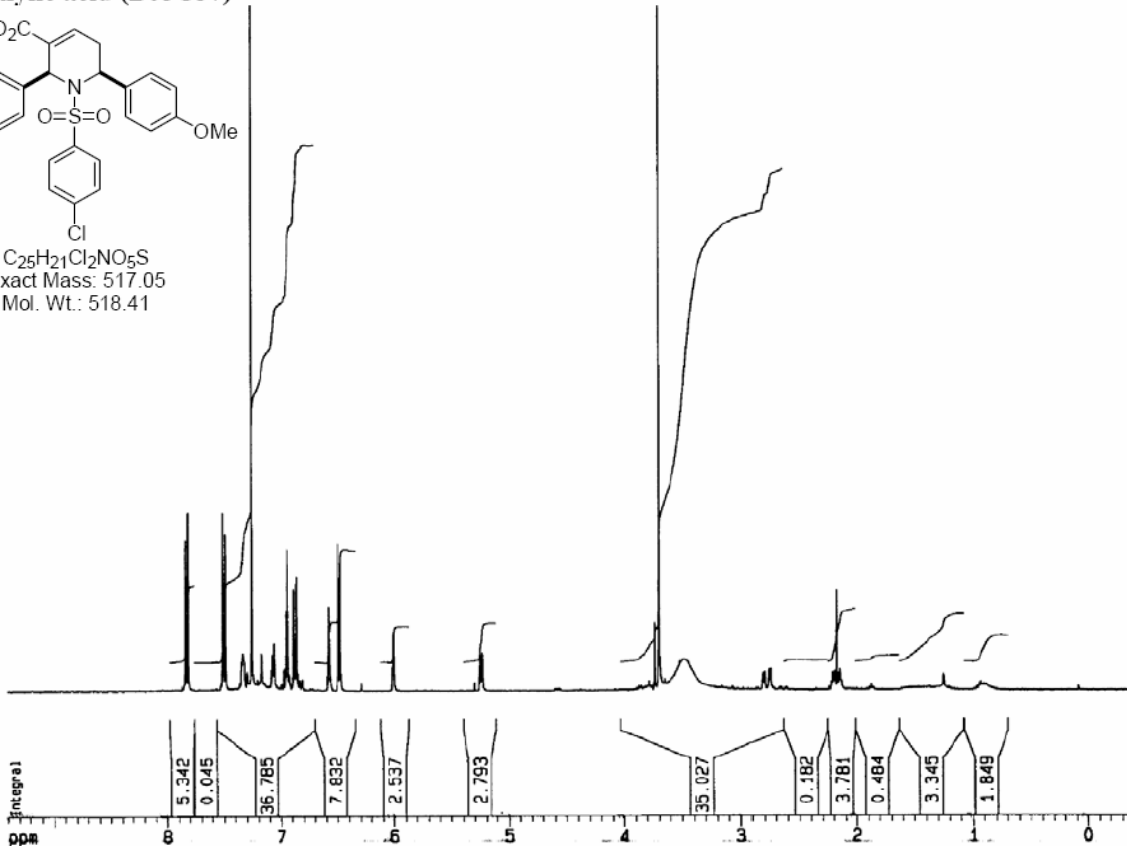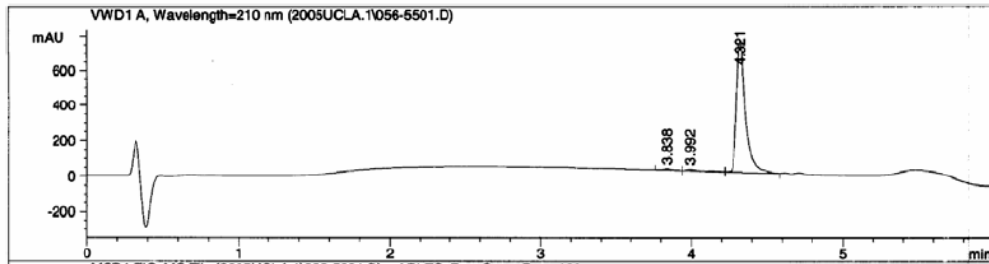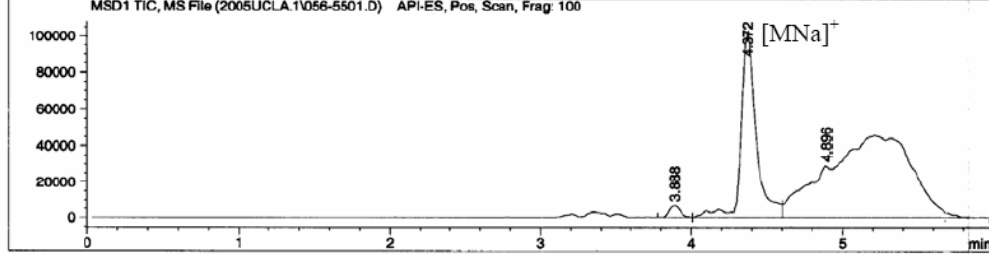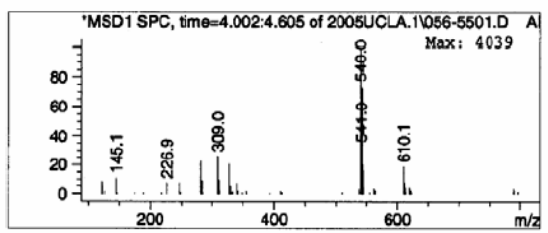

**2-(3-Chlorophenyl)-6-(4-methoxyphenyl)-1-(2-toluenesulfonyl)-1,2,5,6-tetrahydropyridine-3-carboxylic acid (B05C38)**

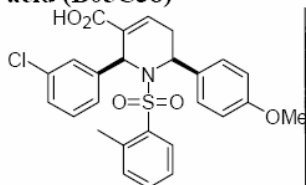

C<sub>26</sub>H<sub>24</sub>ClNO<sub>5</sub>S  
 Exact Mass: 497.11  
 Mol. Wt.: 497.99

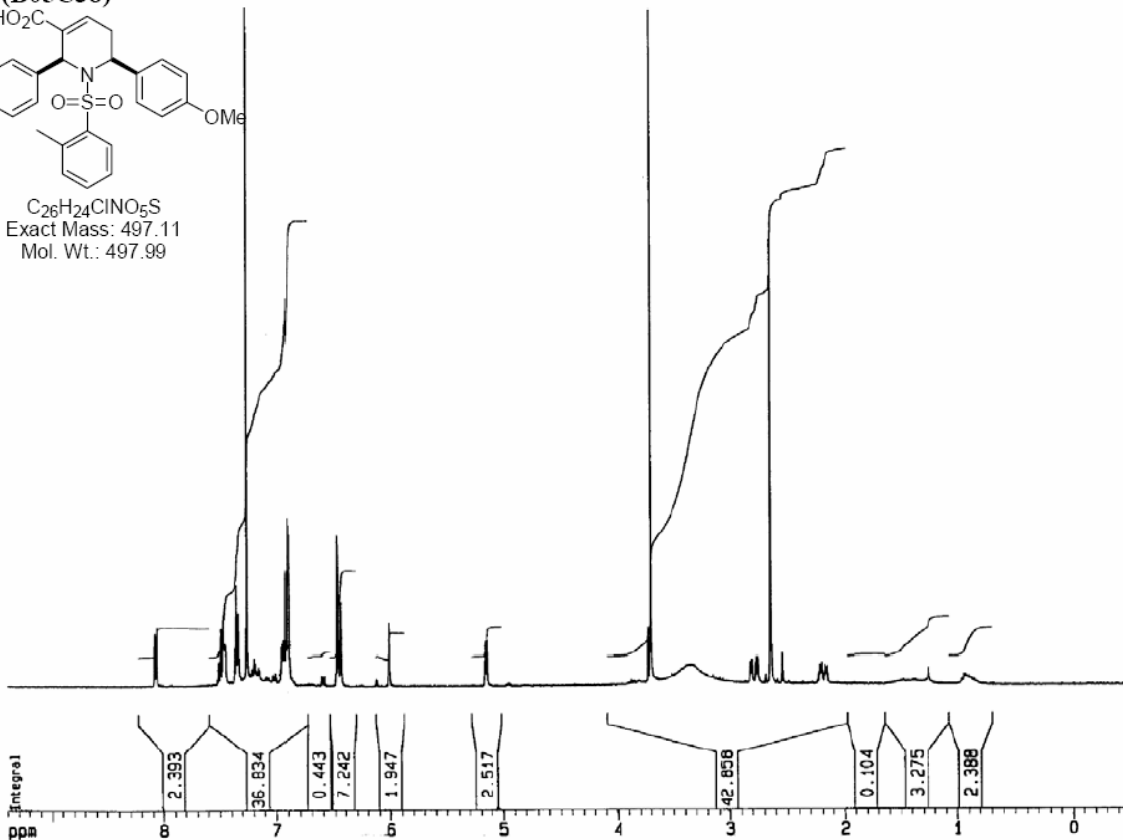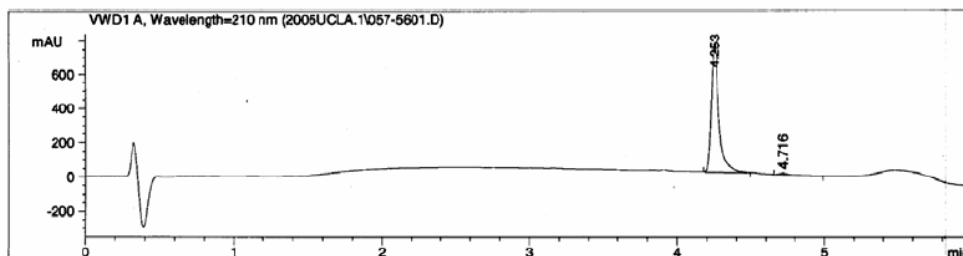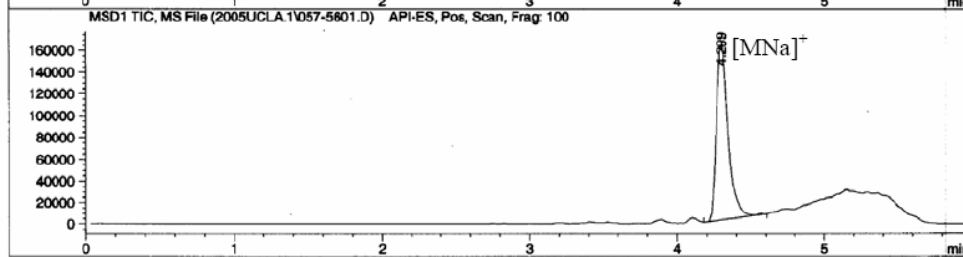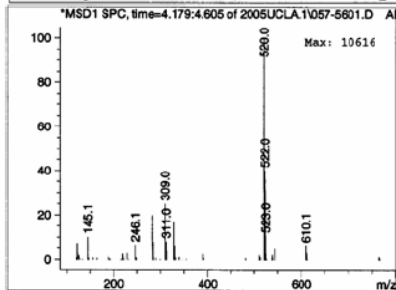

**2-(3-Chlorophenyl)-6-(3-methoxyphenyl)-1-(4-toluenesulfonyl)-1,2,5,6-tetrahydropyridine-3-carboxylic acid (B05C39)**

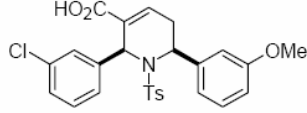

C<sub>26</sub>H<sub>24</sub>ClNO<sub>5</sub>S  
 Exact Mass: 497.11  
 Mol. Wt.: 497.99

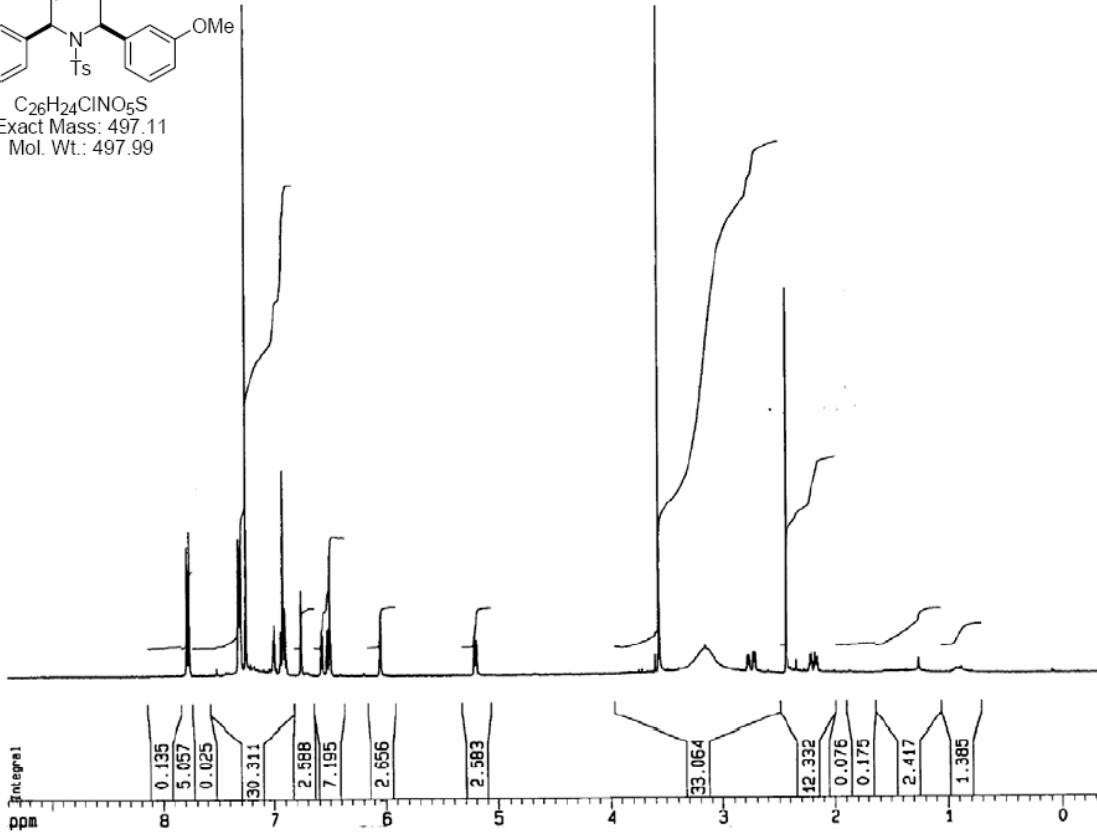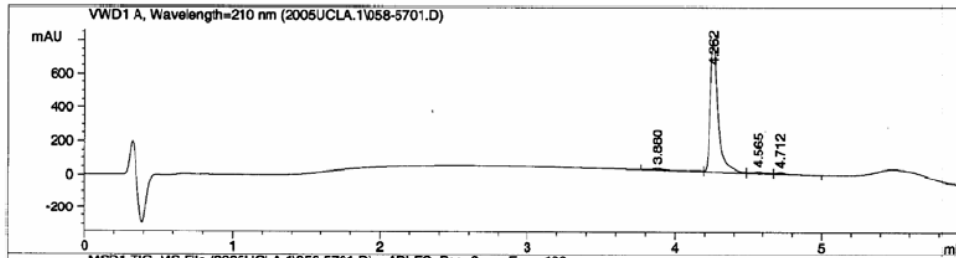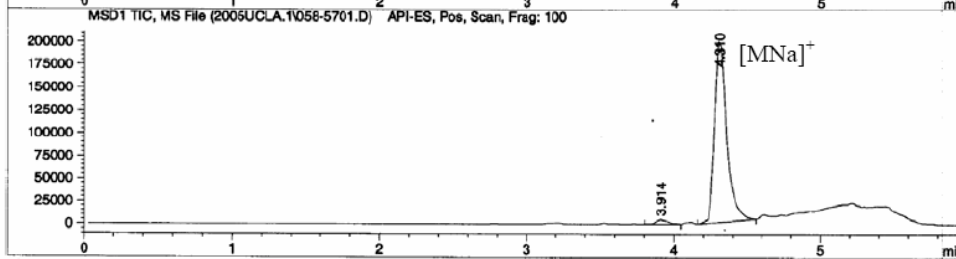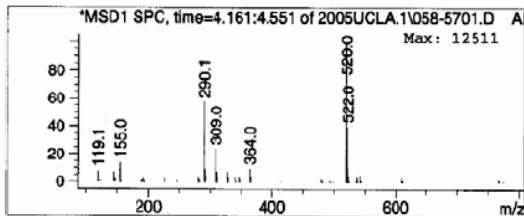

6-(4-Chlorophenyl)-2-(3-chlorophenyl)-1-(2-toluenesulfonyl)-1,2,5,6-tetrahydropyridine-3-carboxylic acid (B05C40)

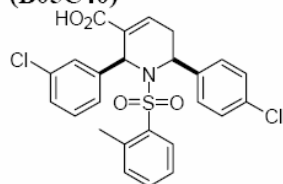

C<sub>25</sub>H<sub>21</sub>Cl<sub>2</sub>NO<sub>4</sub>S  
 Exact Mass: 501.06  
 Mol. Wt.: 502.41

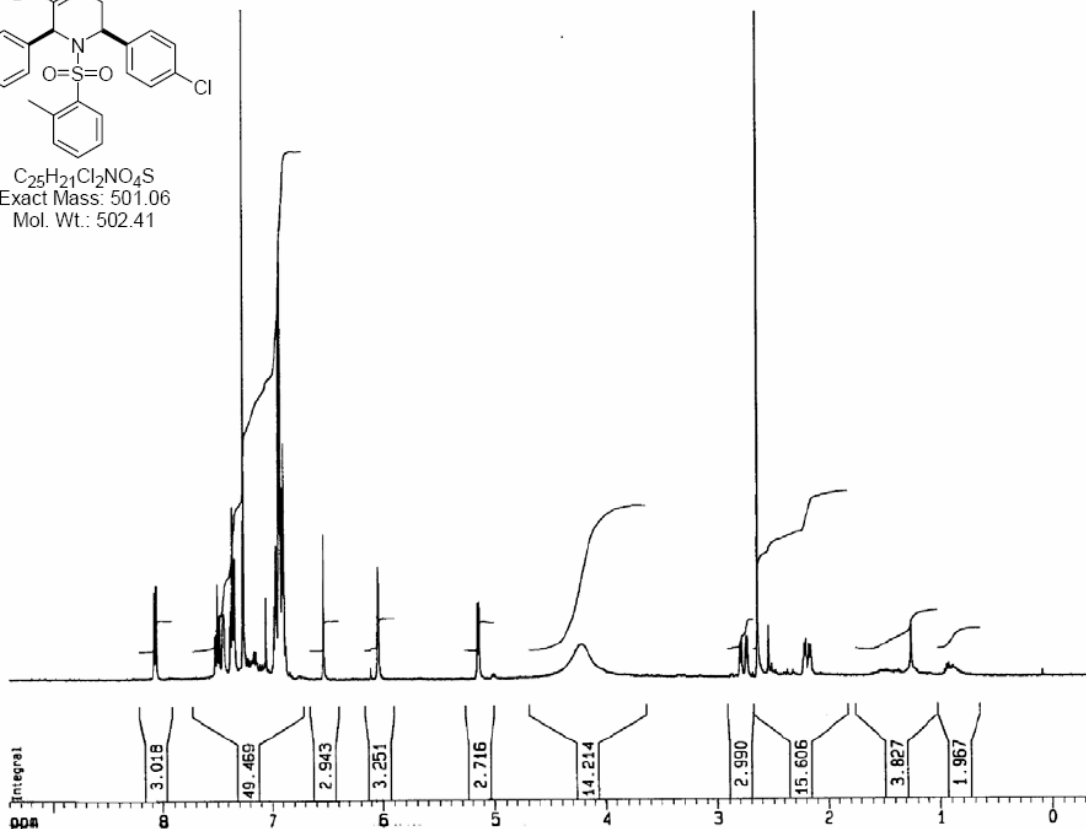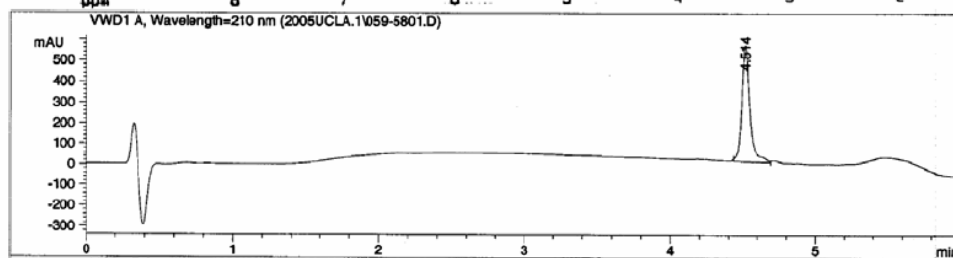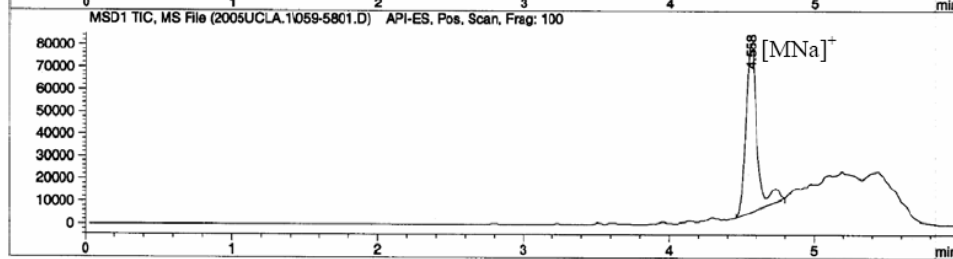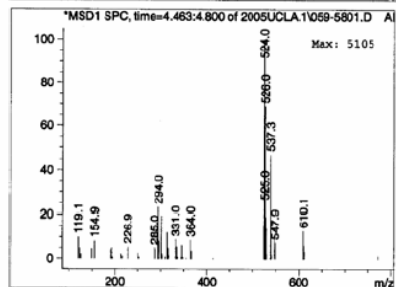



2-(3-Chlorophenyl)-1-(2-toluenesulfonyl)-6-(*p*-tolyl)-1,2,5,6-tetrahydropyridine-3-carboxylic acid (B05C41)

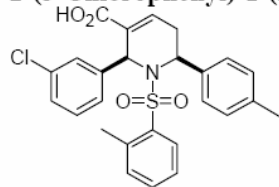

C<sub>26</sub>H<sub>24</sub>ClNO<sub>4</sub>S  
 Exact Mass: 481.11  
 Mol. Wt.: 481.99

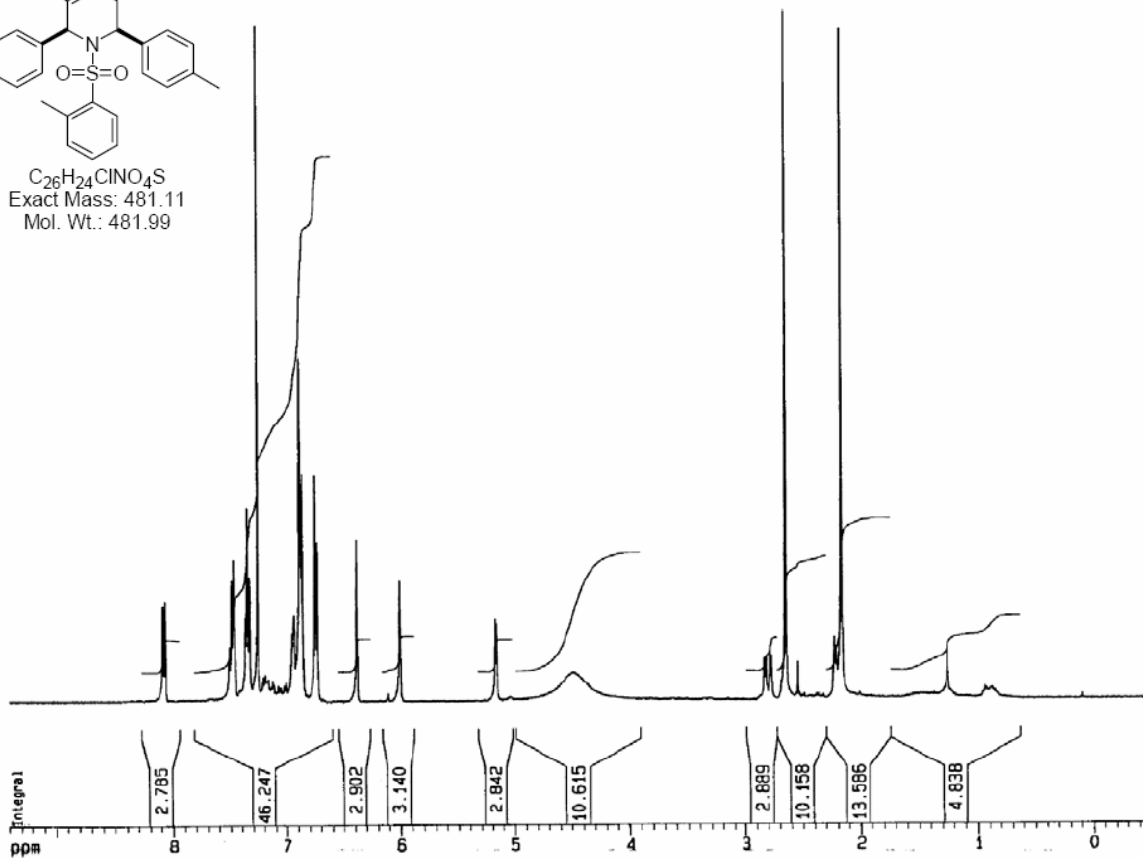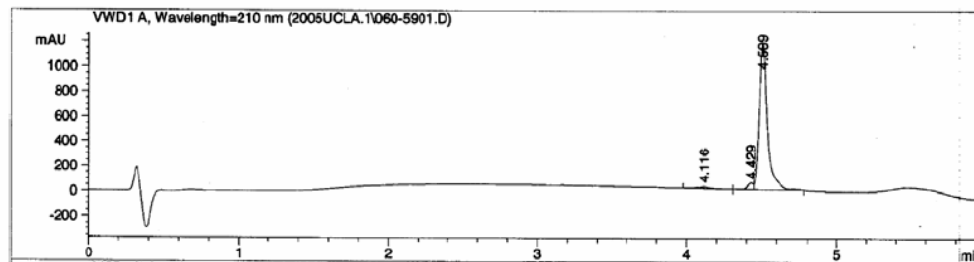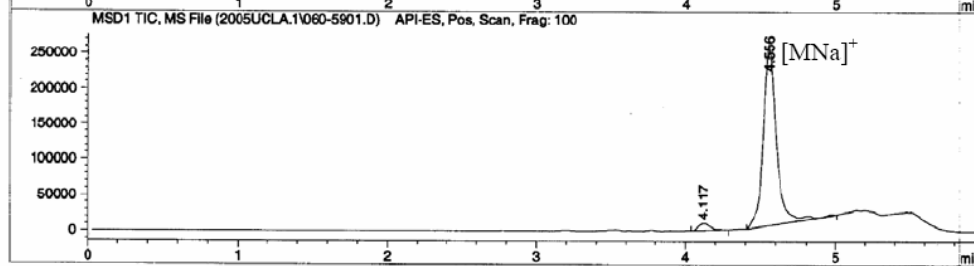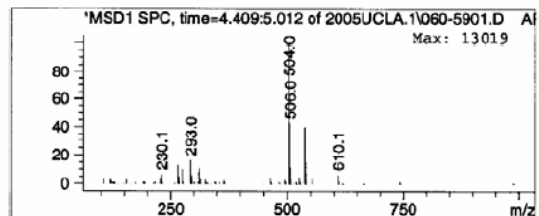

**2-(3-Chlorophenyl)-1-(2-methoxycarbonylbenzenesulfonyl)-6-(*p*-tolyl)-1,2,5,6-tetrahydropyridine-3-carboxylic acid (B05C42)**

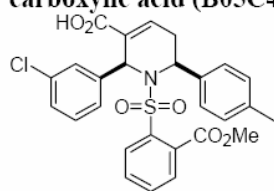

C<sub>27</sub>H<sub>24</sub>ClNO<sub>6</sub>S  
 Exact Mass: 525.10  
 Mol. Wt.: 526.00

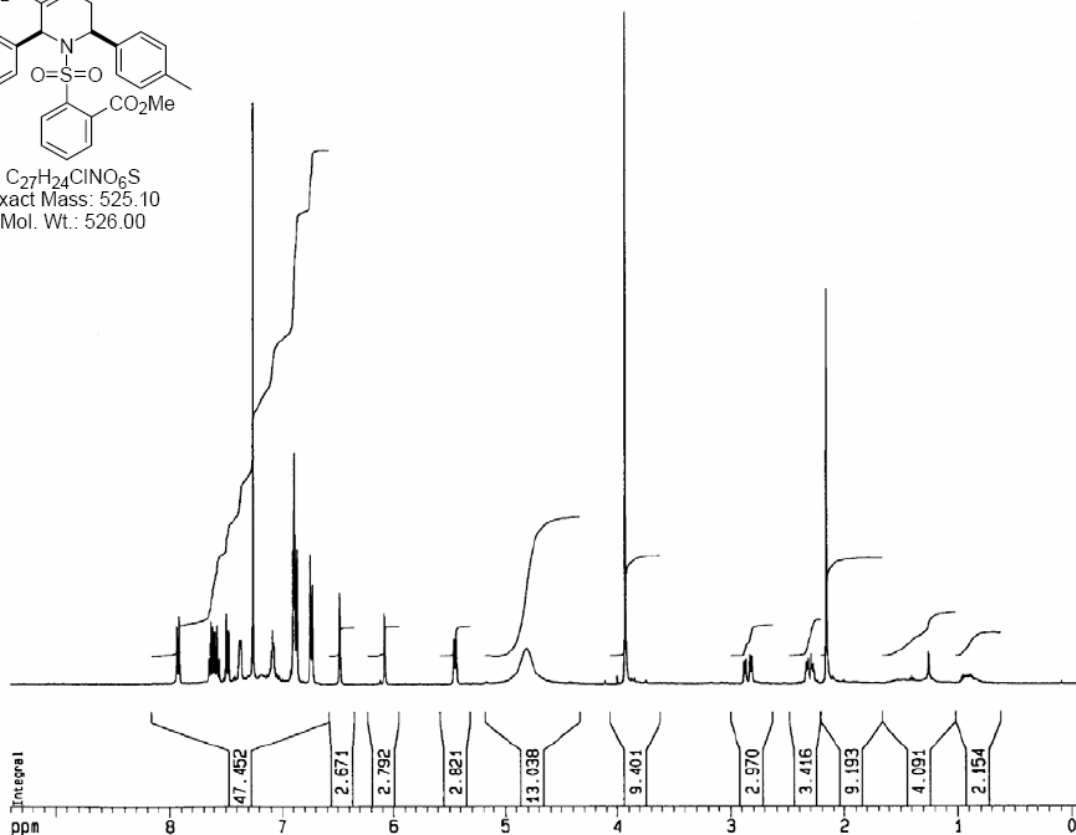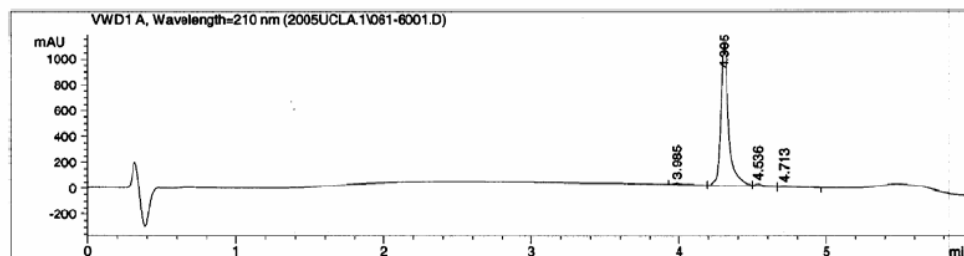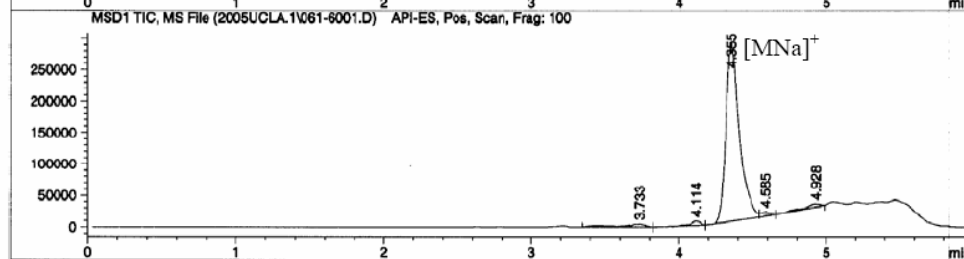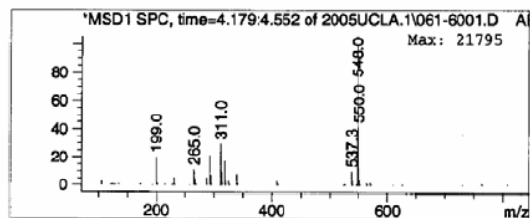

1-Benzenesulfonyl-2-(3-chlorophenyl)-6-(*p*-tolyl)-1,2,5,6-tetrahydropyridine-3-carboxylic acid (B05C43)

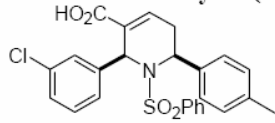

C<sub>25</sub>H<sub>22</sub>ClNO<sub>4</sub>S  
 Exact Mass: 467.10  
 Mol. Wt.: 467.96

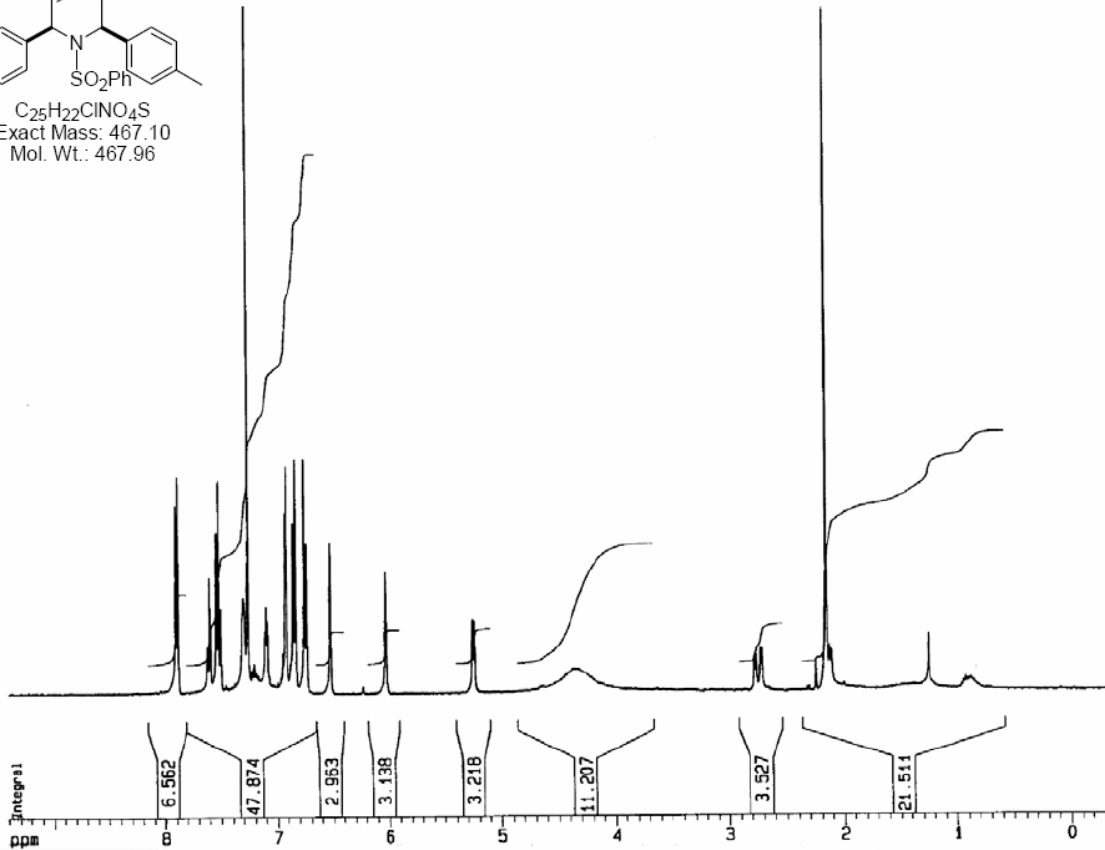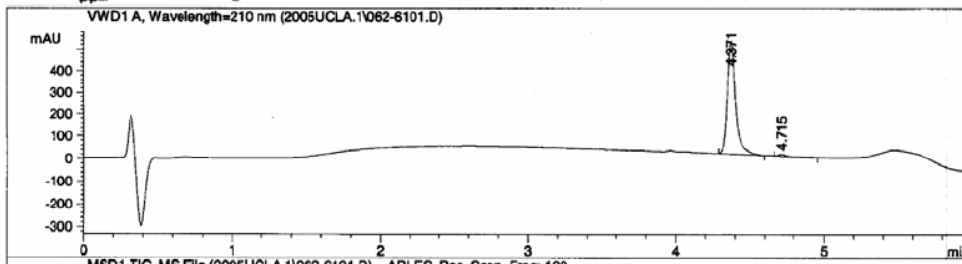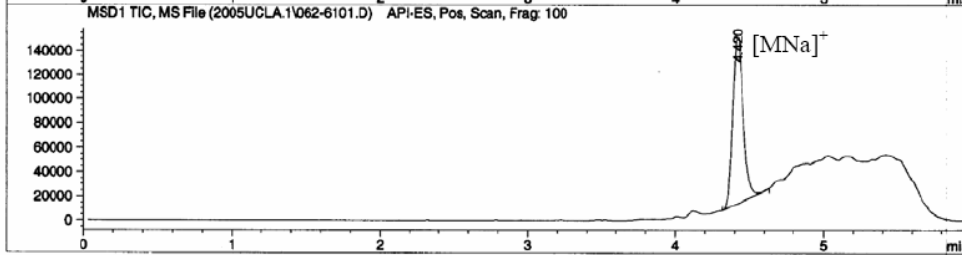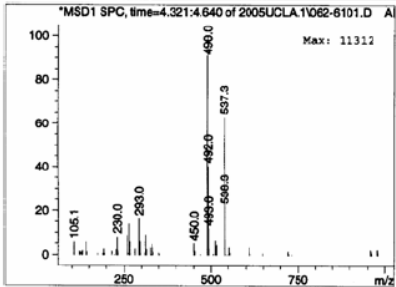

2-(3-Chlorophenyl)-1-(4-nitrobenzenesulfonyl)-6-(*p*-tolyl)-1,2,5,6-tetrahydropyridine-3-carboxylic acid (B05C44)

Not included

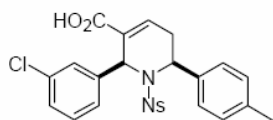

C<sub>25</sub>H<sub>21</sub>ClN<sub>2</sub>O<sub>6</sub>S  
Exact Mass: 512.08  
Mol. Wt.: 512.96

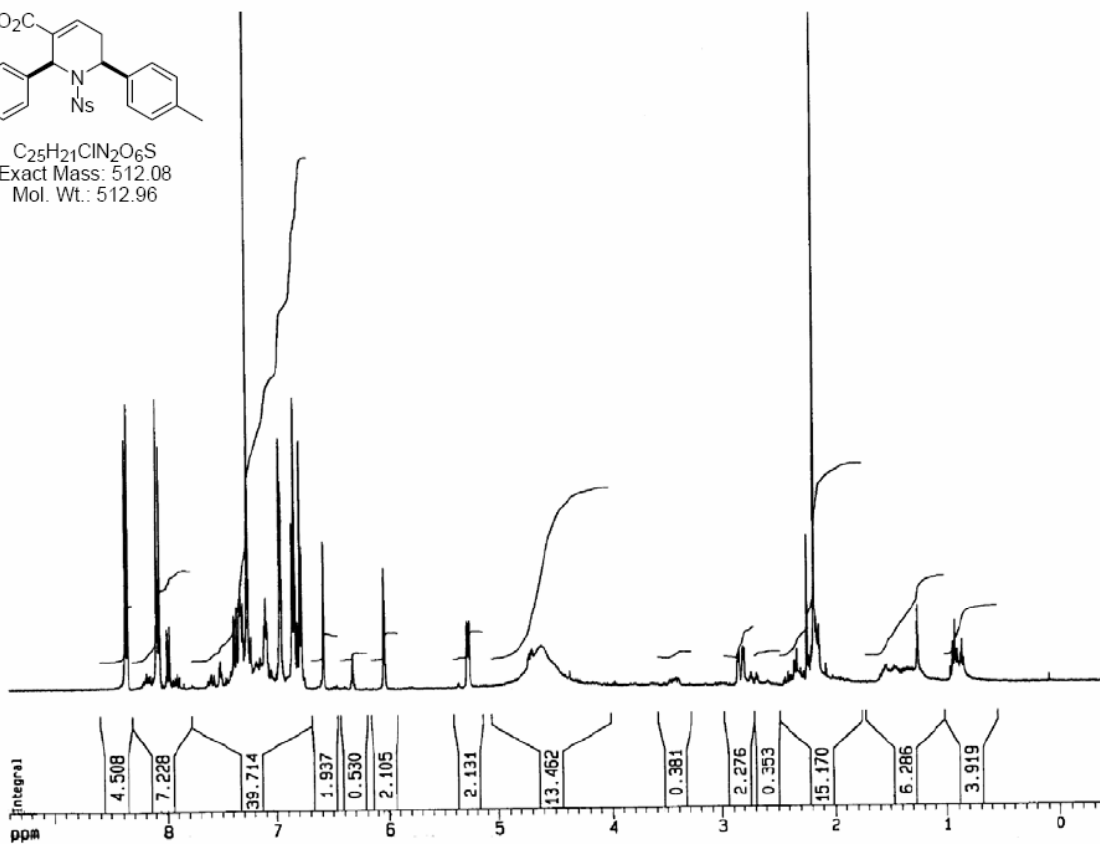

**2-(3-Chlorophenyl)-1-(3-nitrobenzenesulfonyl)-6-(*p*-tolyl)-1,2,5,6-tetrahydropyridine-3-carboxylic acid (B05C45)**

Not included

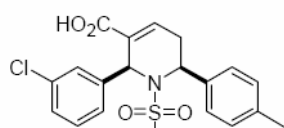

C<sub>25</sub>H<sub>21</sub>ClN<sub>2</sub>O<sub>6</sub>S  
Exact Mass: 512.08  
Mol. Wt.: 512.96

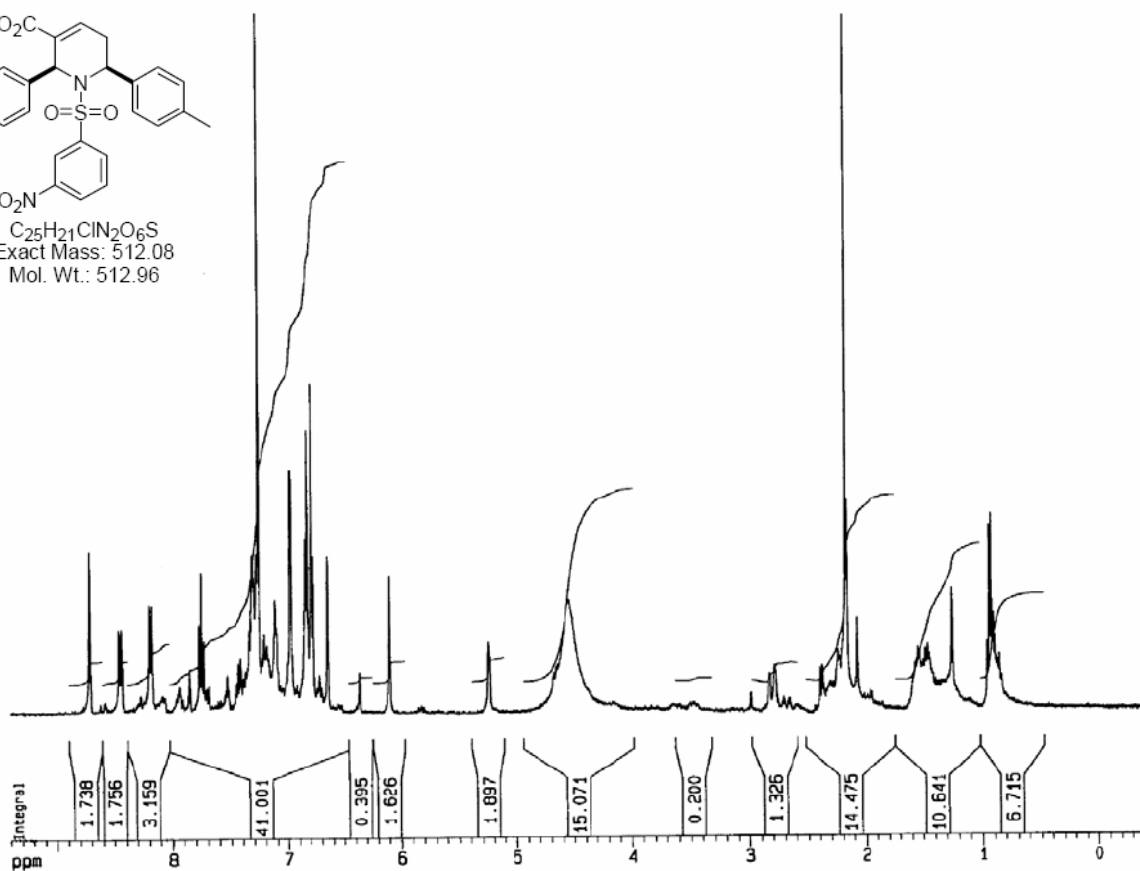

**2-(3-Chlorophenyl)-1-methanesulfonyl-6-(*p*-tolyl)-1,2,5,6-tetrahydropyridine-3-carboxylic acid (B05C46)**

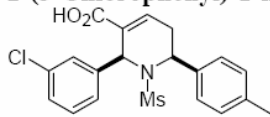

C<sub>20</sub>H<sub>20</sub>ClNO<sub>4</sub>S  
 Exact Mass: 405.08  
 Mol. Wt.: 405.90

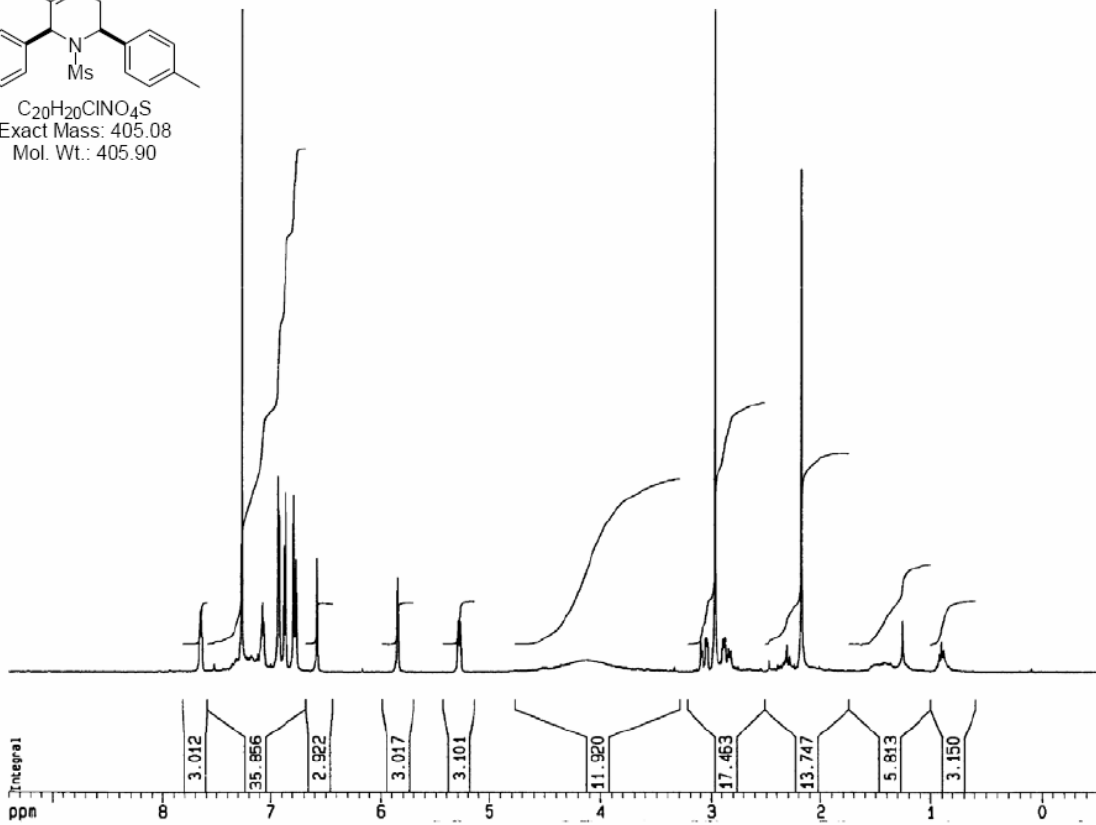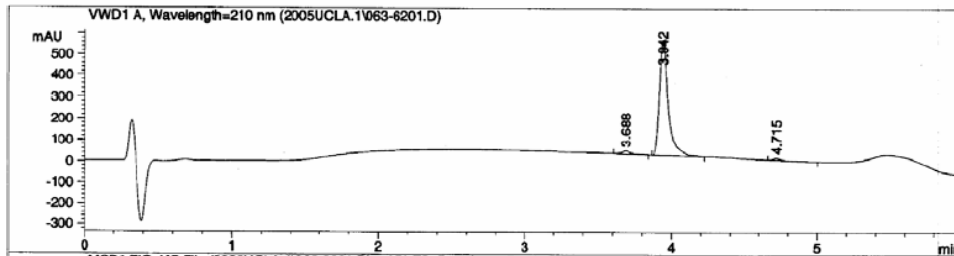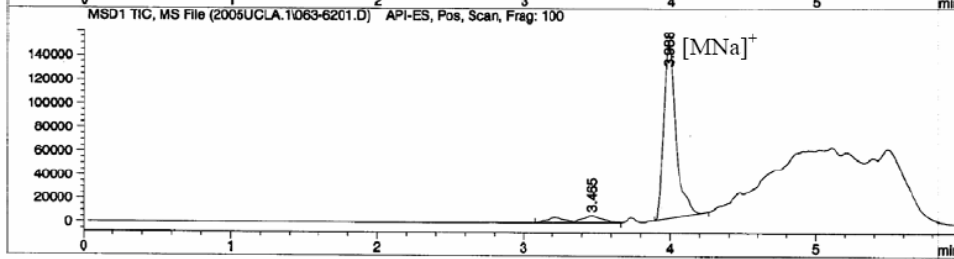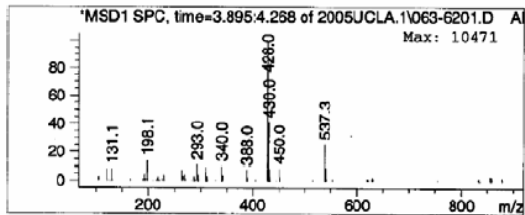

### Spectral data for Table 12

#### 4-Benzylsulfanyl-6-phenyl-1-(4-toluenesulfonyl)-piperidine-3-carboxylic acid (B01C01E06)

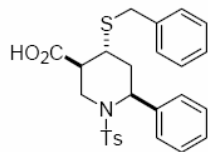

C<sub>26</sub>H<sub>27</sub>NO<sub>4</sub>S<sub>2</sub>  
 Exact Mass: 481.14  
 Mol. Wt.: 481.63

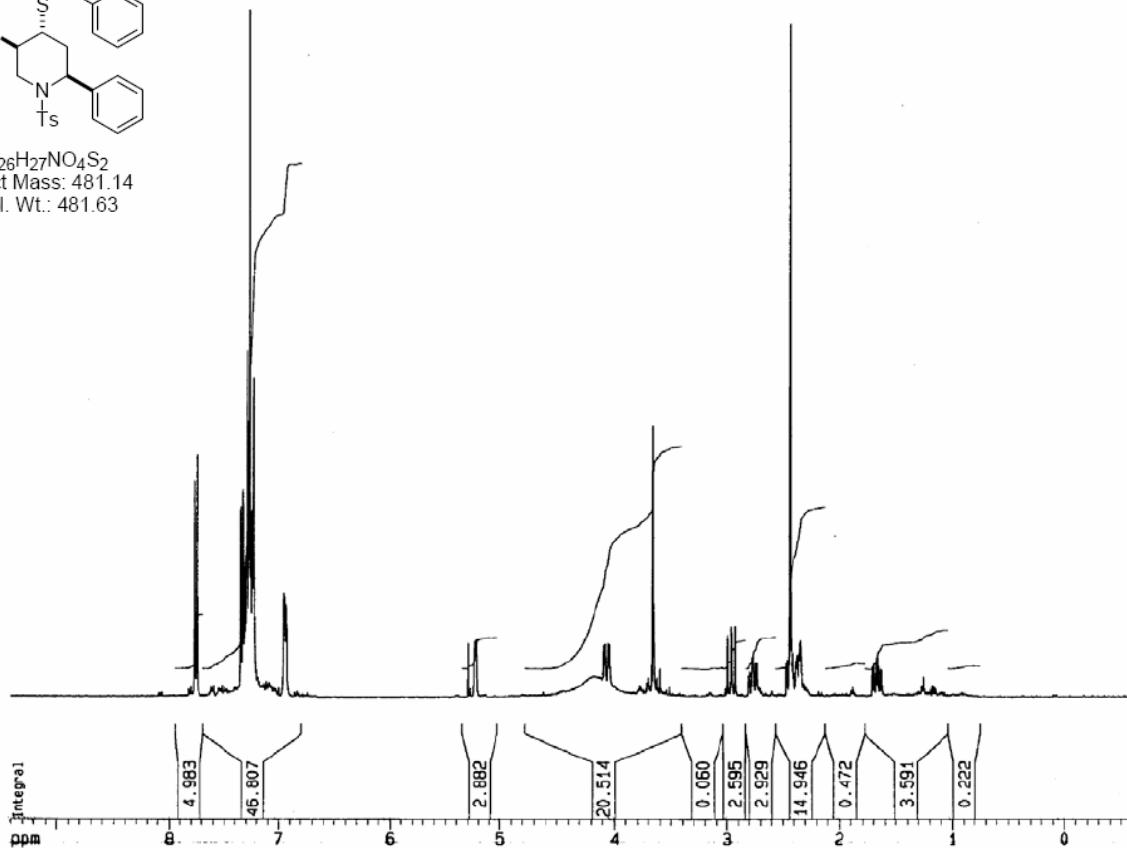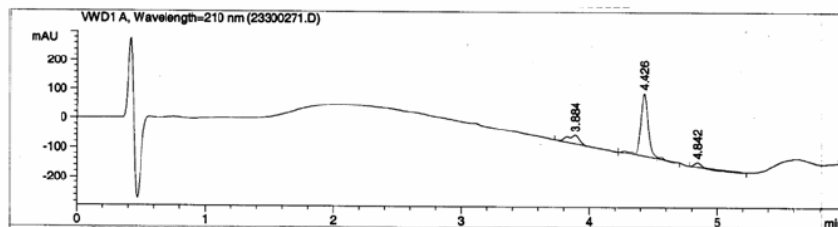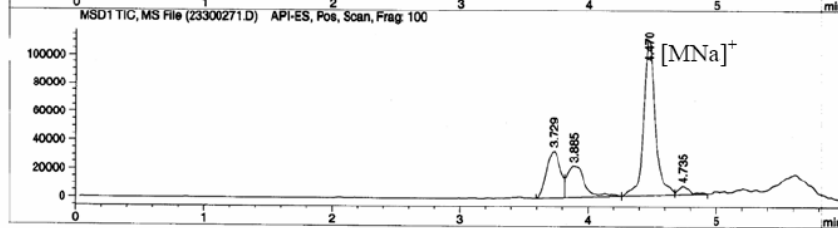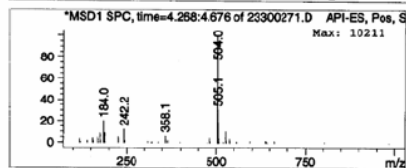

4-Benzylsulfanyl-1-(4-toluenesulfonyl)-6-(*p*-tolyl)-piperidine-3-carboxylic acid (B01C02E06)

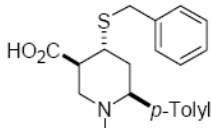

C<sub>27</sub>H<sub>29</sub>NO<sub>4</sub>S<sub>2</sub>  
 Exact Mass: 495.15  
 Mol. Wt.: 495.65

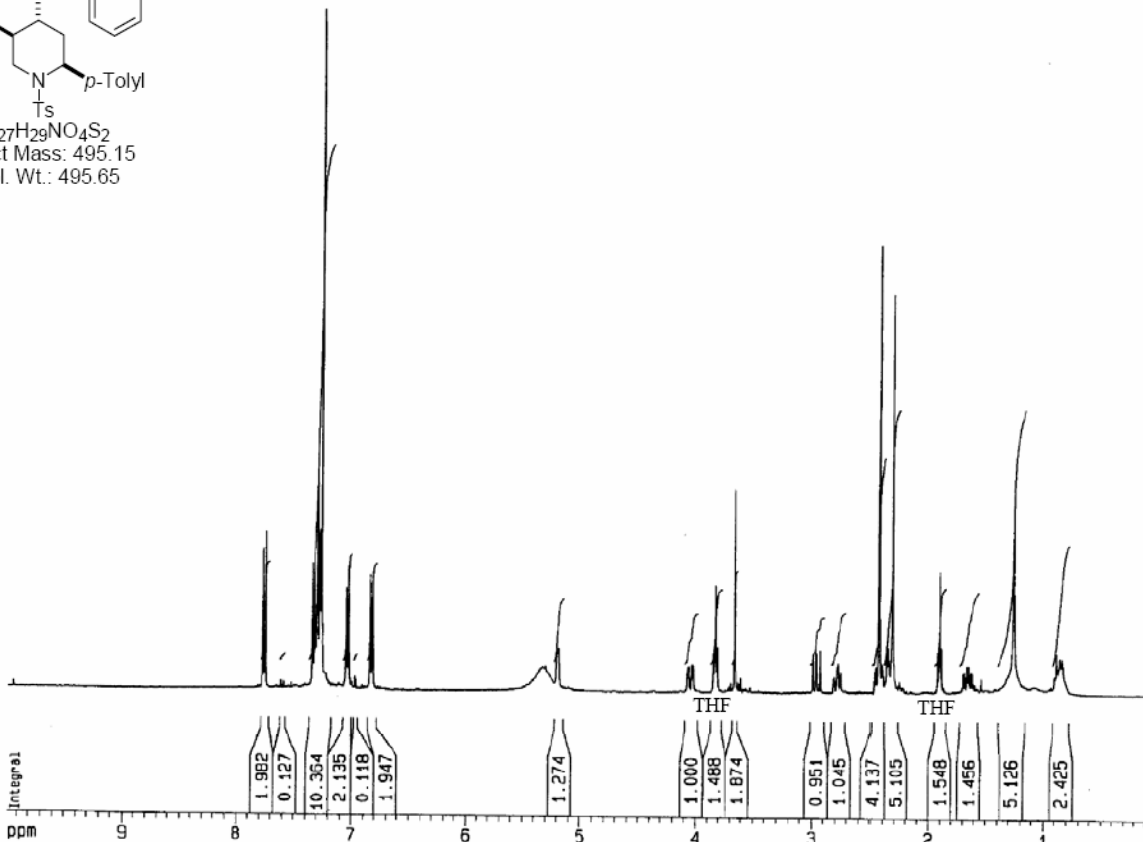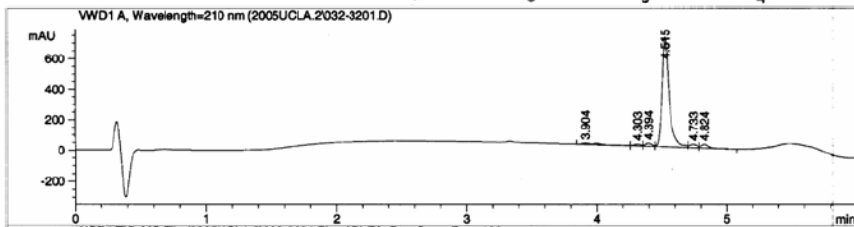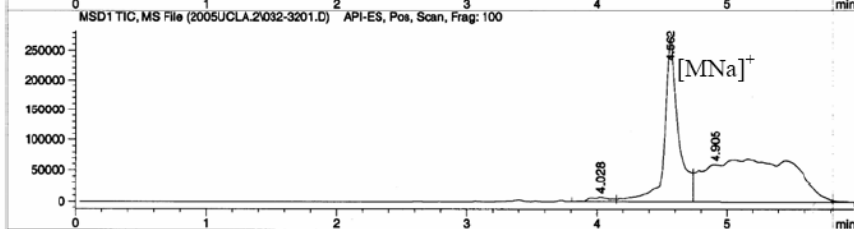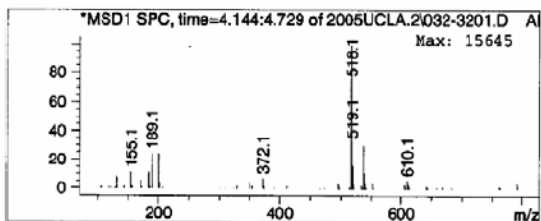



4-Benzylsulfanyl-6-(4-ethylphenyl)-1-(4-toluenesulfonyl)-piperidine-3-carboxylic acid (B01C03E06)

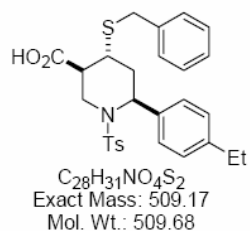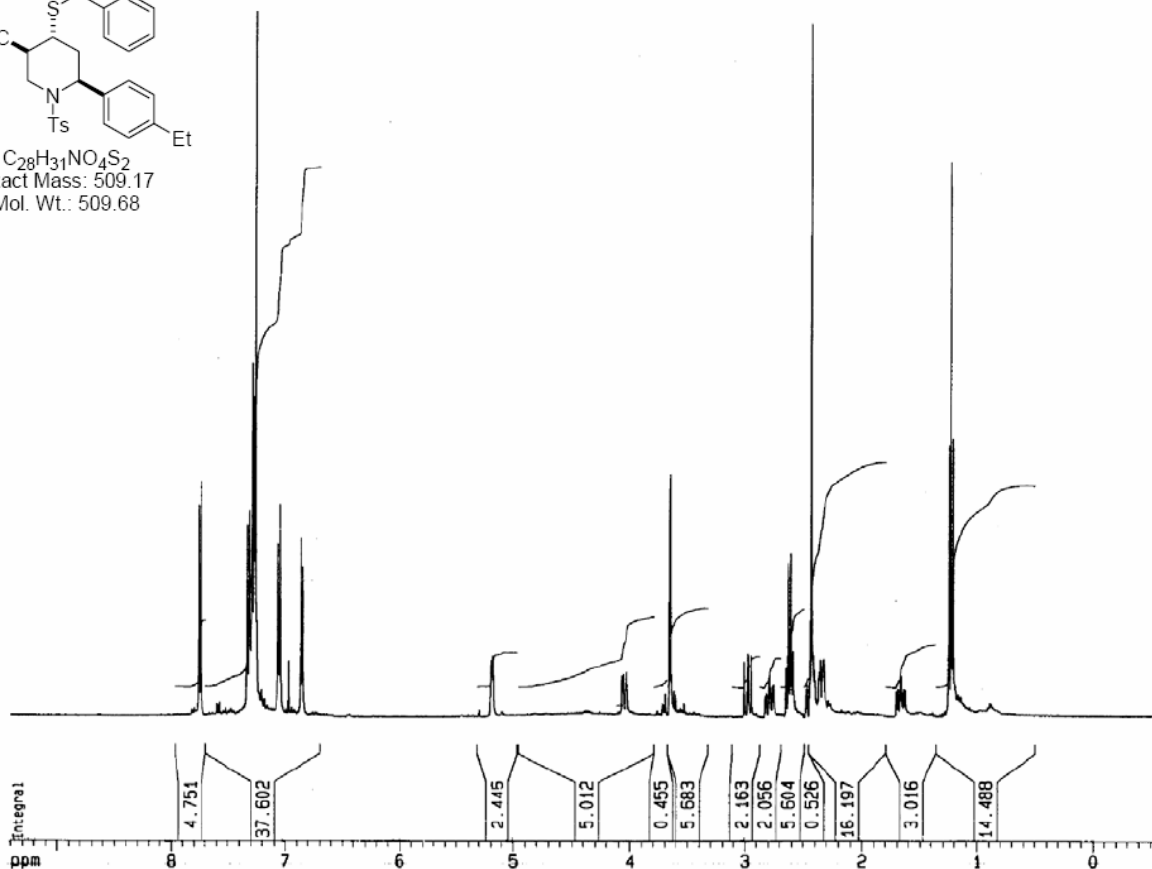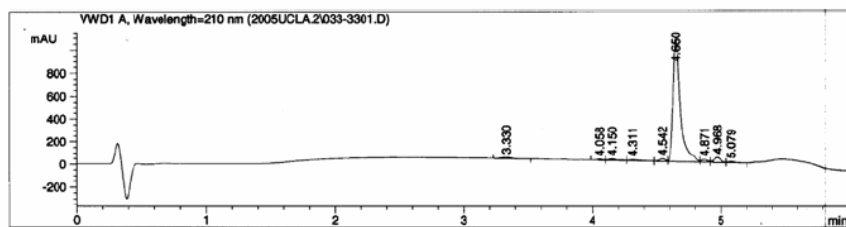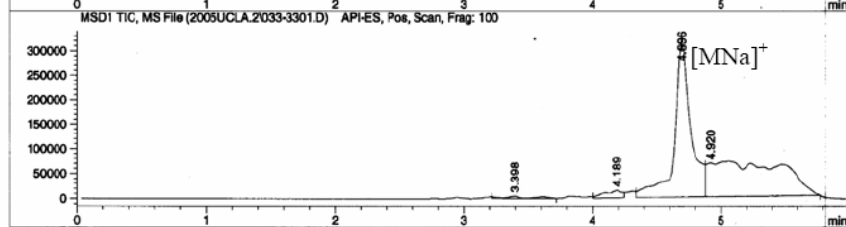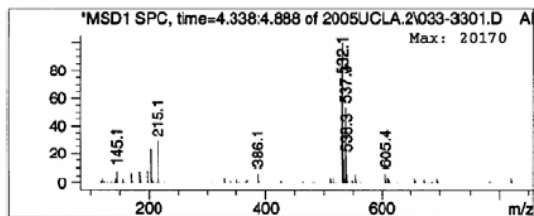

# 4-Benzylsulfanyl-6-(4-methoxyphenyl)-1-(4-toluenesulfonyl)-piperidine-3-carboxylic acid (B01C04E06)

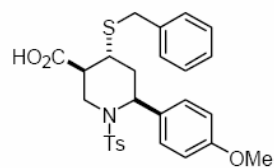

C<sub>27</sub>H<sub>29</sub>NO<sub>5</sub>S<sub>2</sub>  
Exact Mass: 511.15  
Mol. Wt.: 511.65

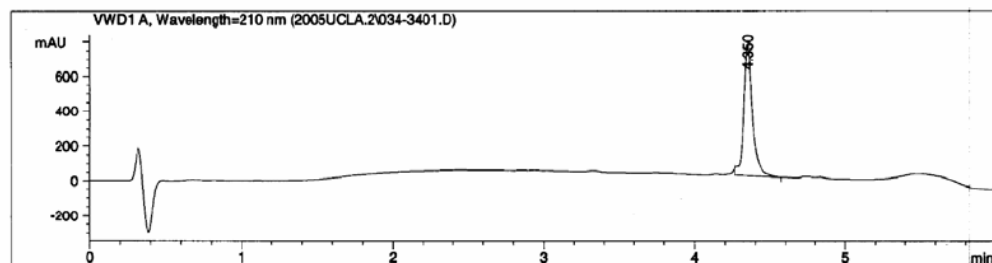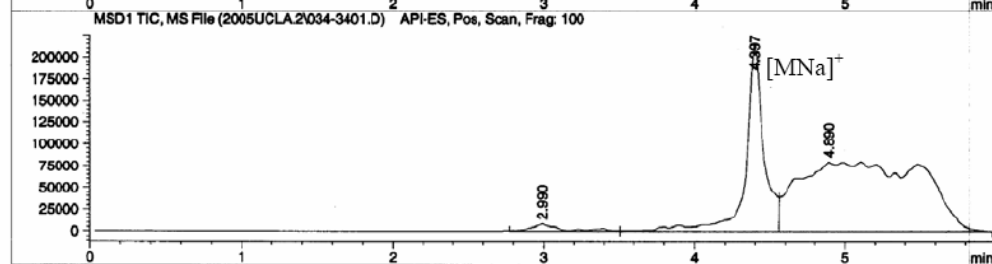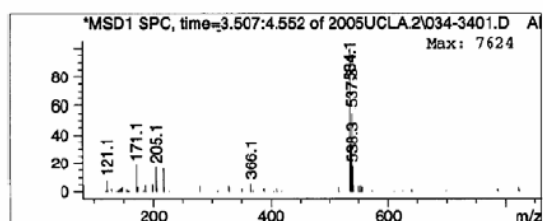

4-Benzylsulfanyl-6-(4-ethoxyphenyl)-1-(4-toluenesulfonyl)-piperidine-3-carboxylic acid (B01C05E06)

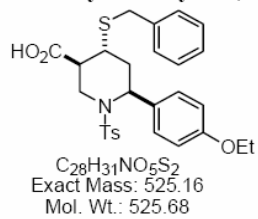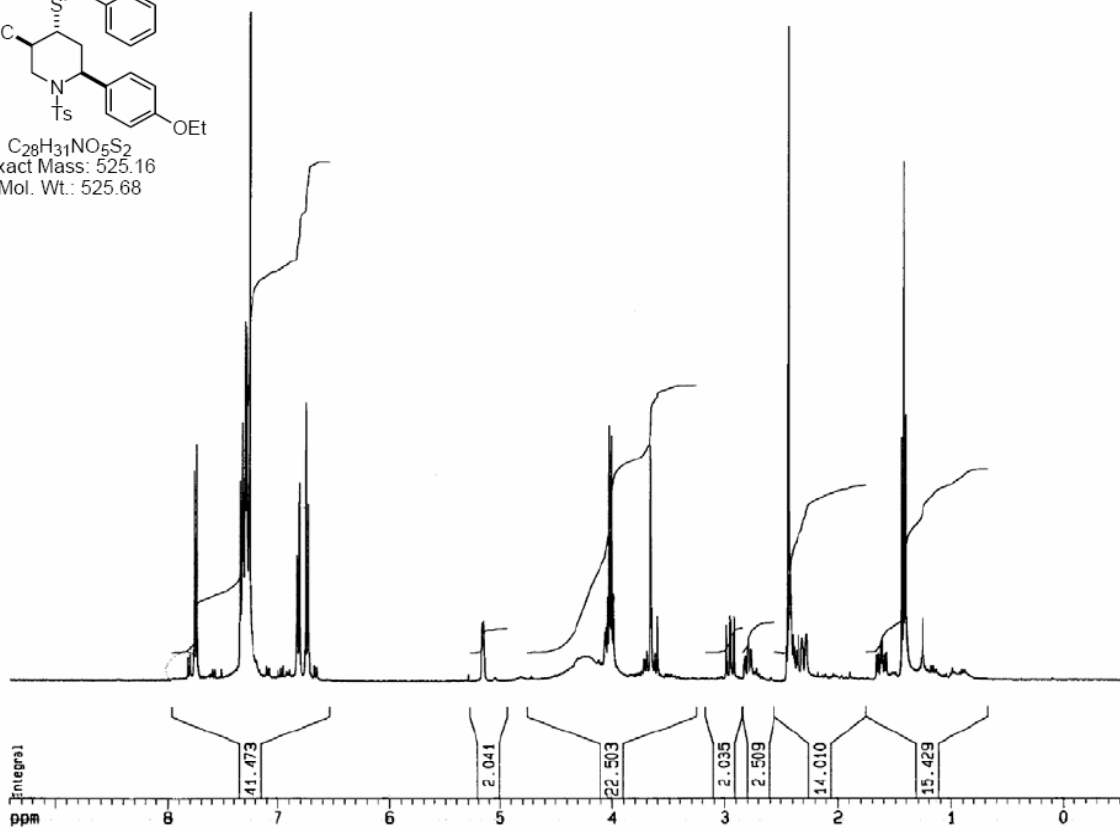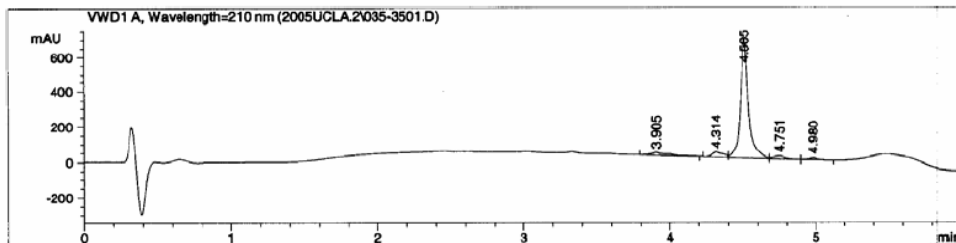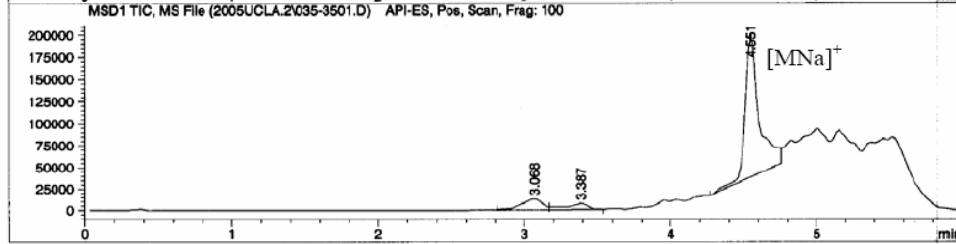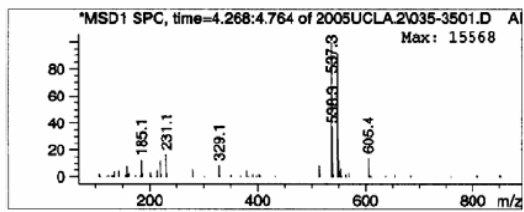

Component 1: Peak at Scan 255.9. Top ions are 548 549 231

6-(Benzo[1,3]dioxol-5-yl)-4-benzylsulfanyl-1-(4-toluenesulfonyl)-piperidine-3-carboxylic acid (B01C06E06)

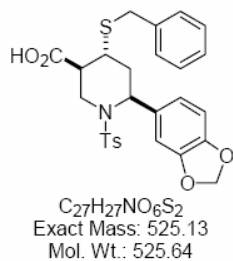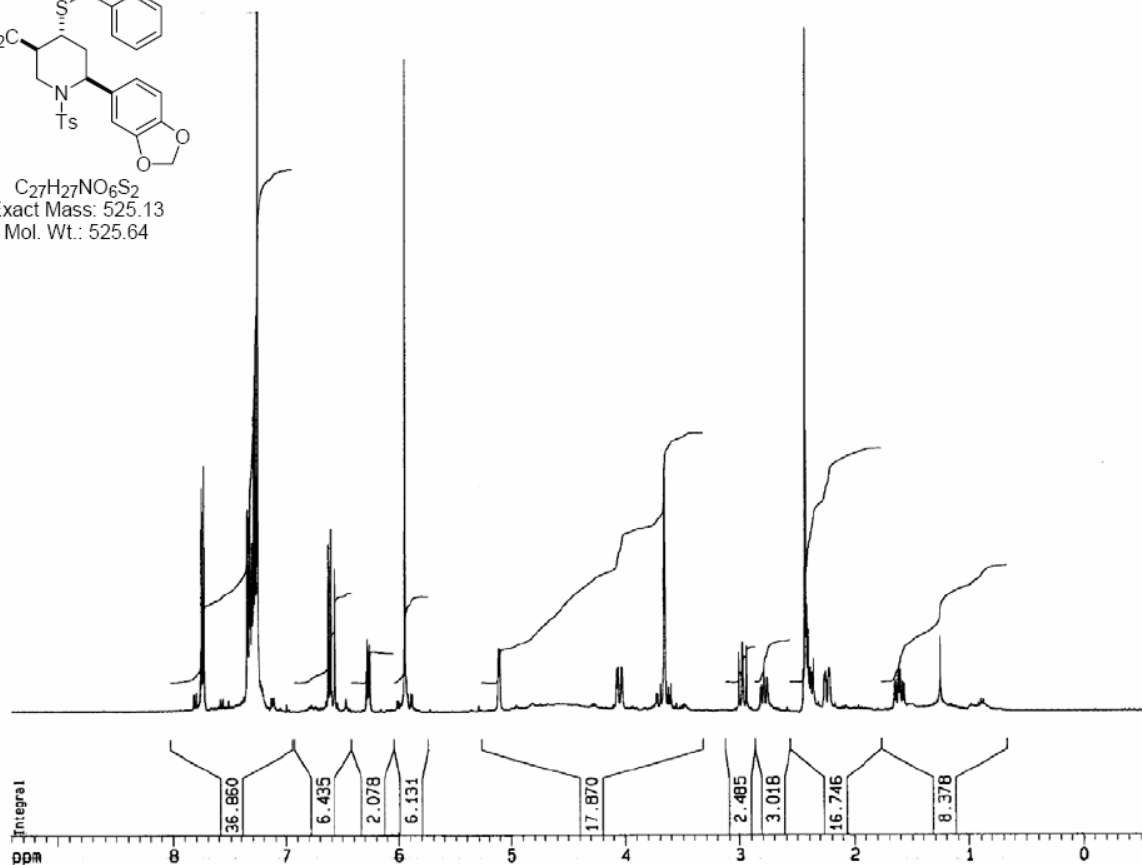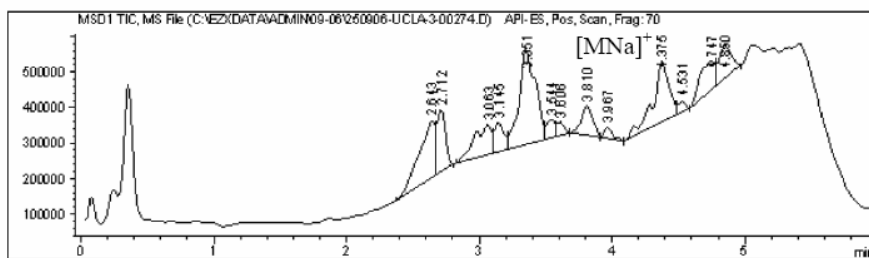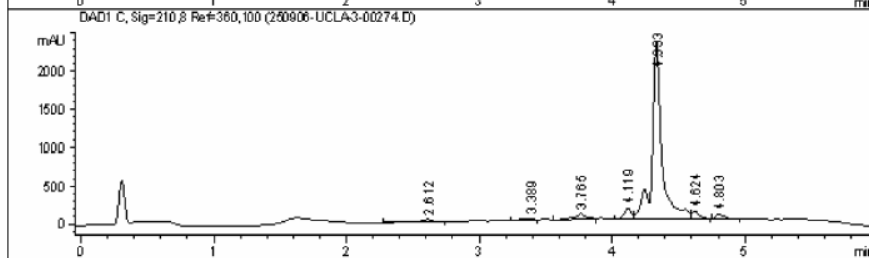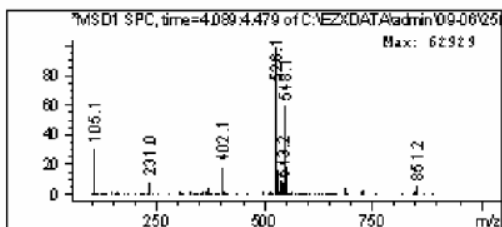

4-Benzylsulfanyl-6-(4-dimethylaminophenyl)-1-(4-toluenesulfonyl)-piperidine-3-carboxylic acid

acid

(B01C07E06)

Not included

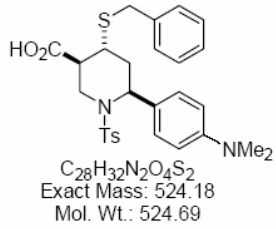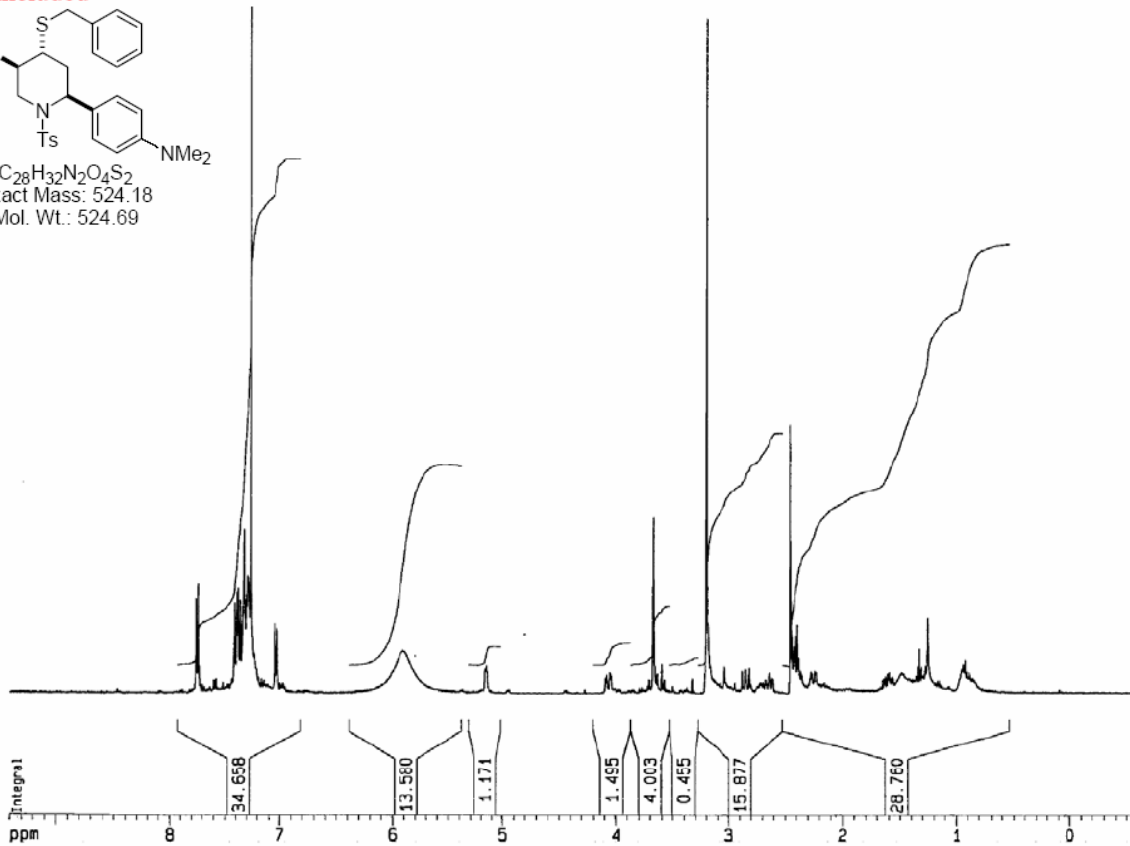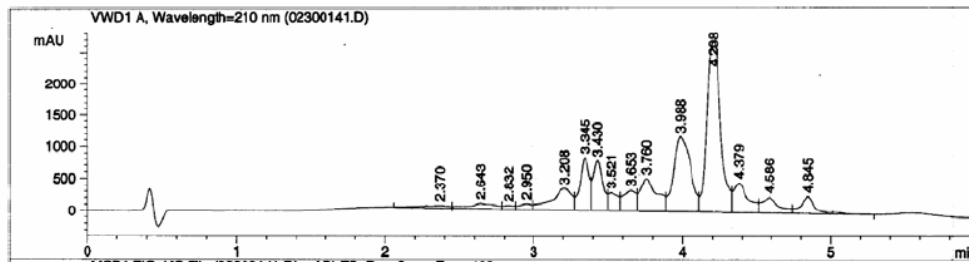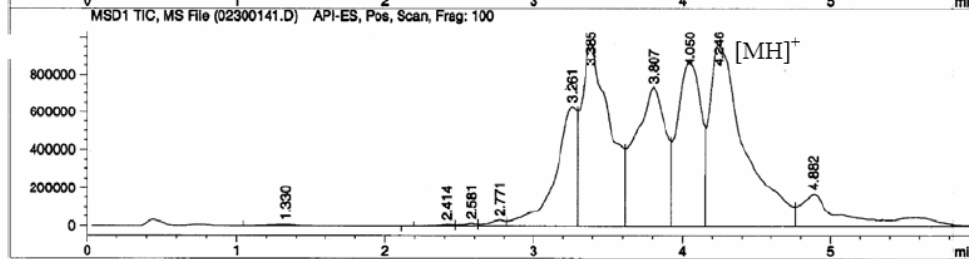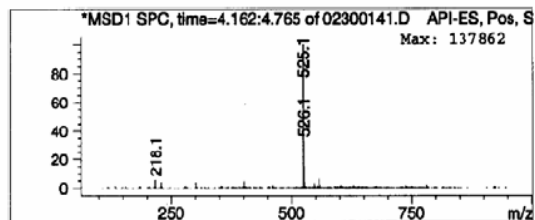

4-Benzylsulfanyl-6-(2-fluorophenyl)-1-(4-toluenesulfonyl)-piperidine-3-carboxylic acid (B01C10E06)

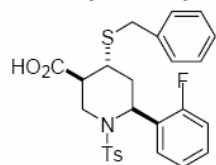

C<sub>26</sub>H<sub>26</sub>FNO<sub>4</sub>S<sub>2</sub>  
 Exact Mass: 499.13  
 Mol. Wt.: 499.62

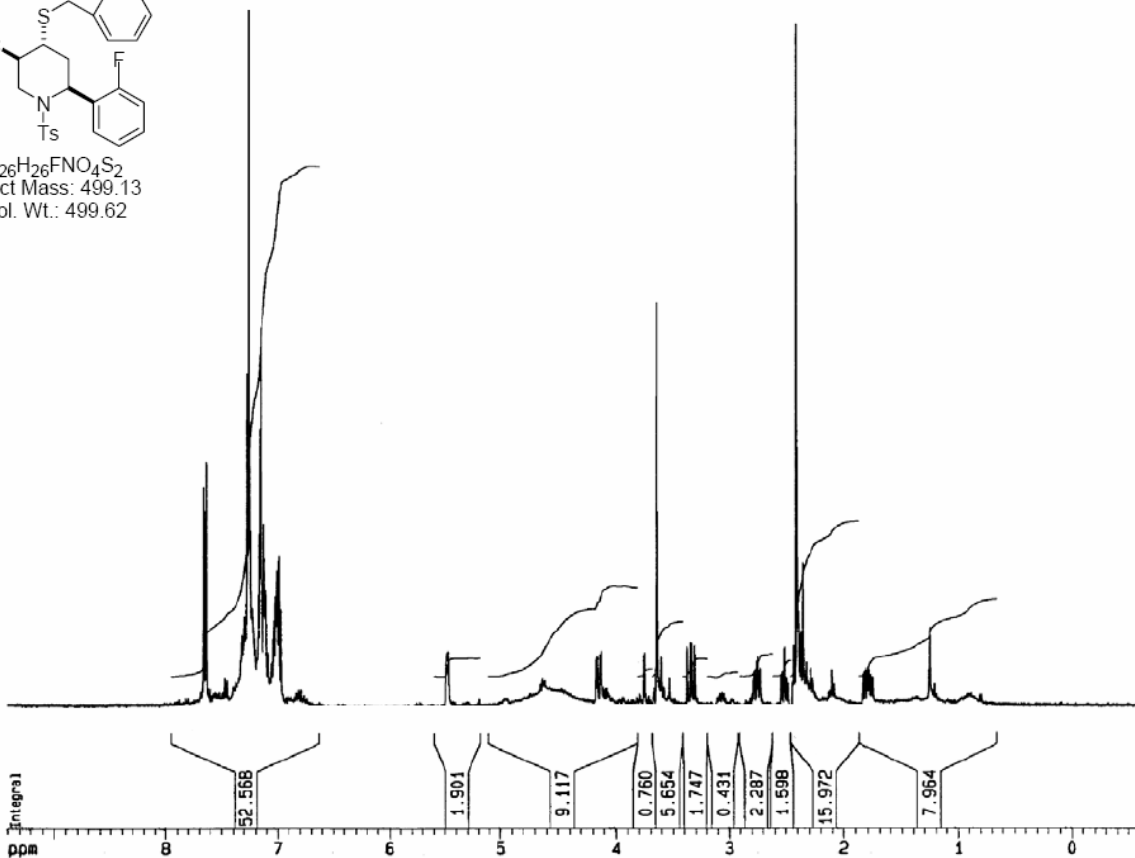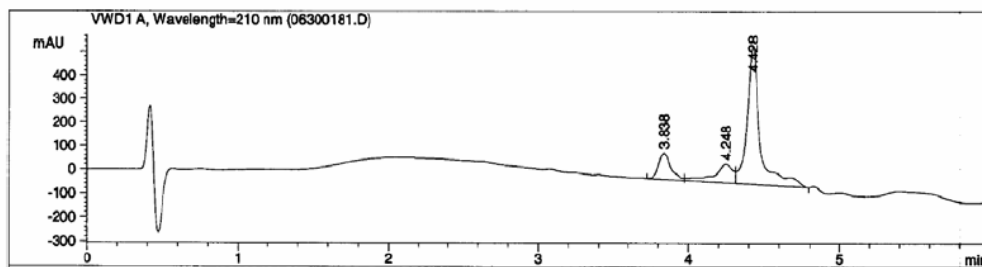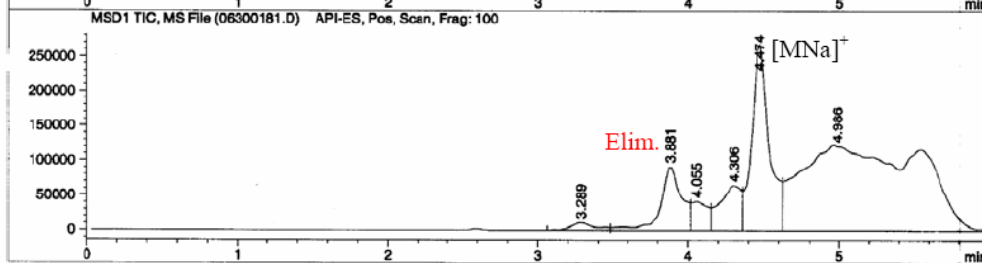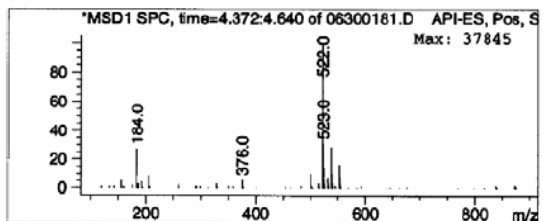

4-Benzylsulfanyl-6-(4-chlorophenyl)-1-(4-toluenesulfonyl)-piperidine-3-carboxylic acid (B01C11E06)

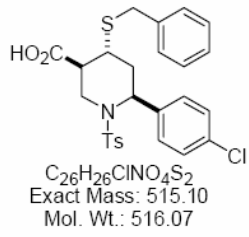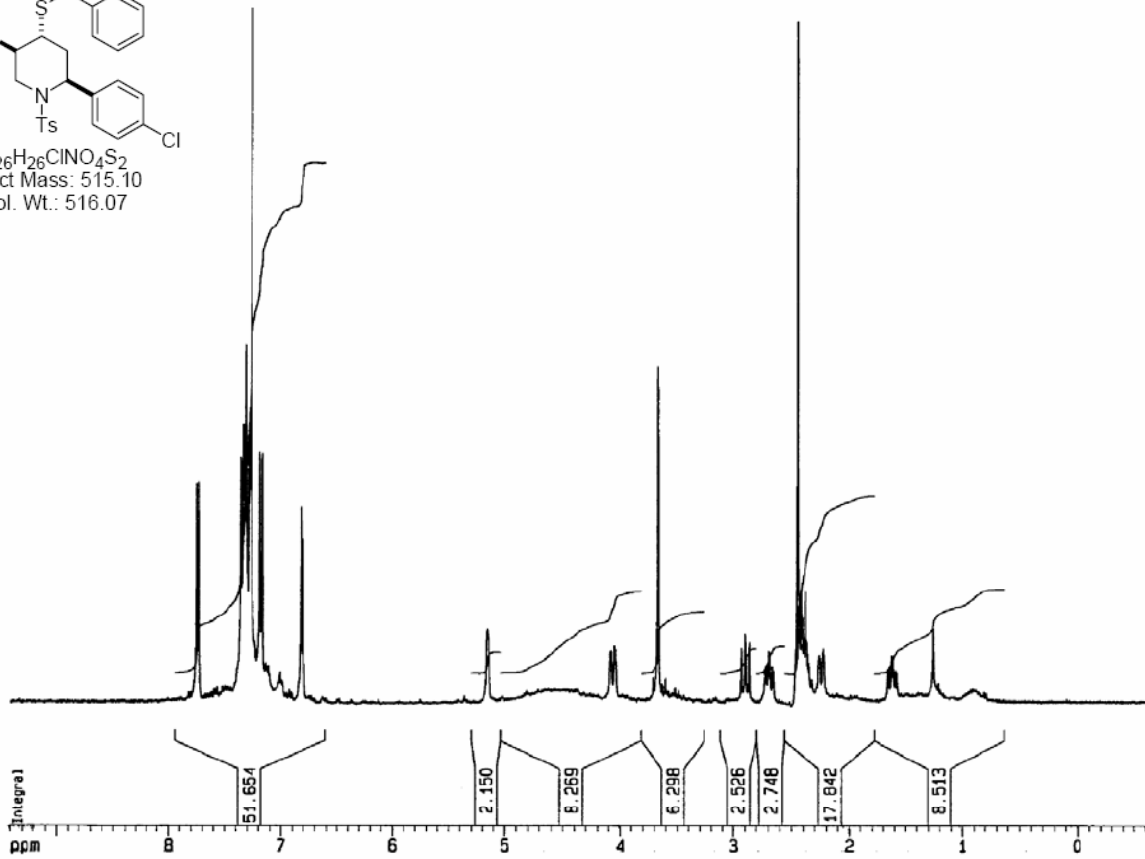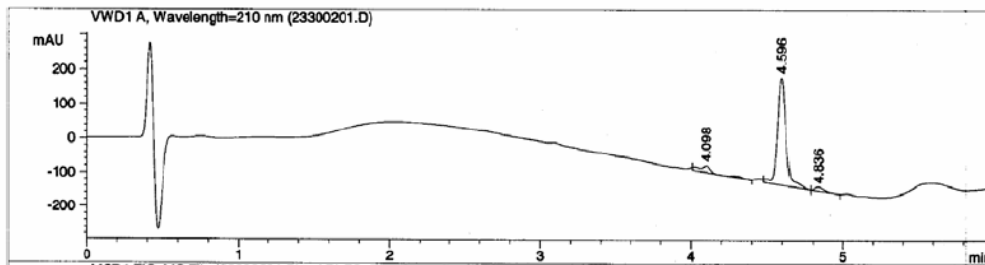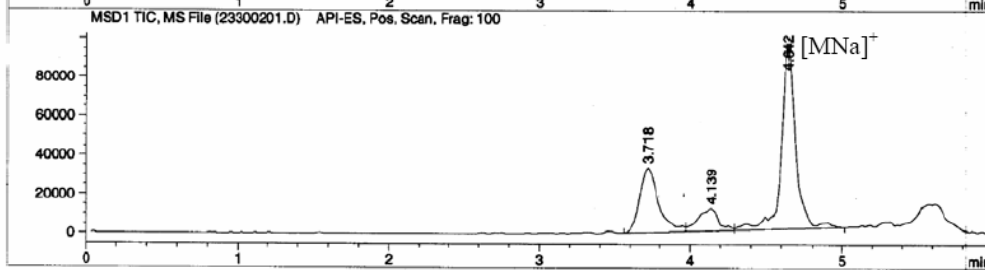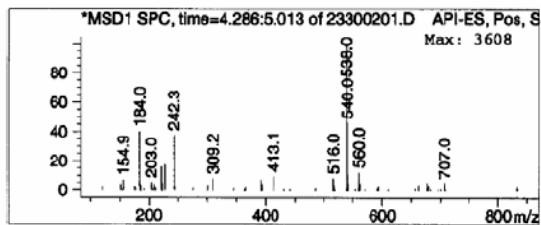

4-Benzylsulfanyl-6-(3-chlorophenyl)-1-(4-toluenesulfonyl)-piperidine-3-carboxylic acid (B01C12E06)

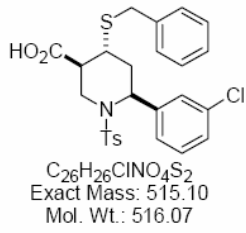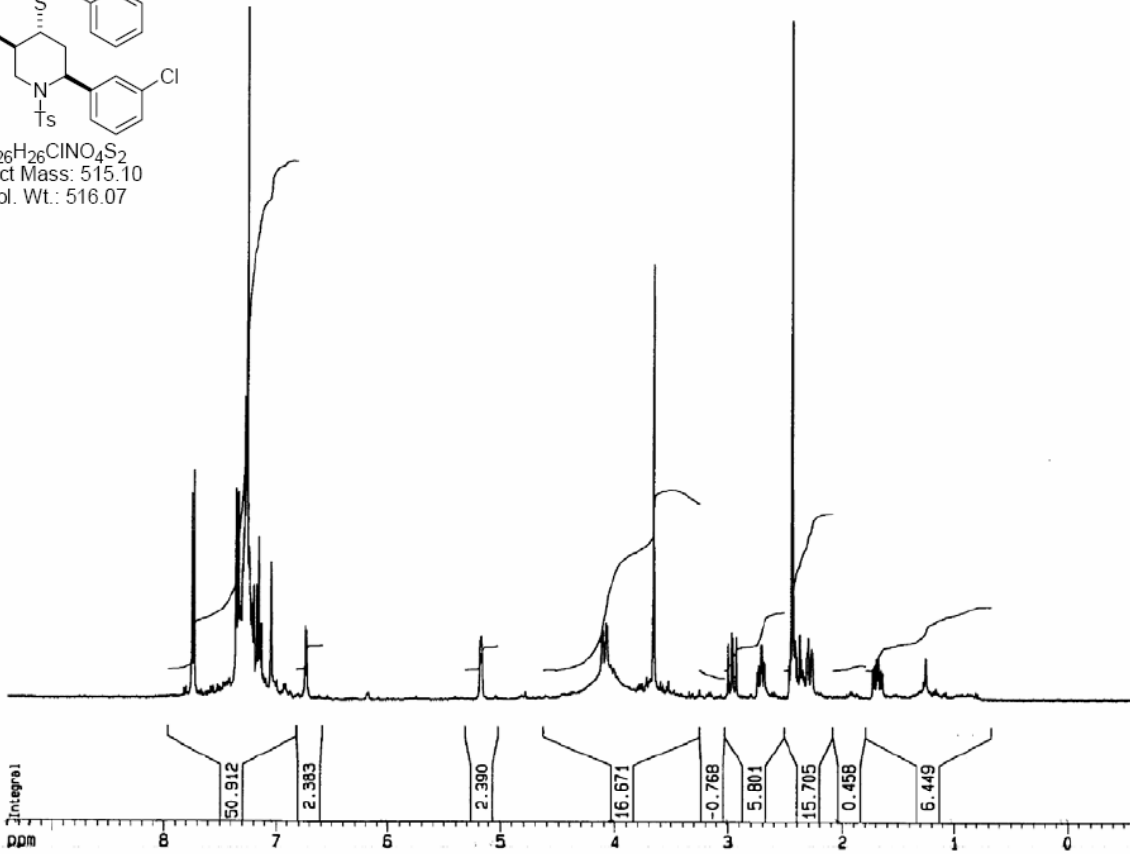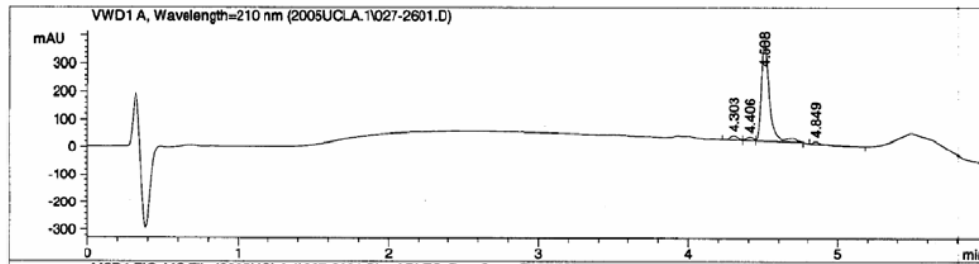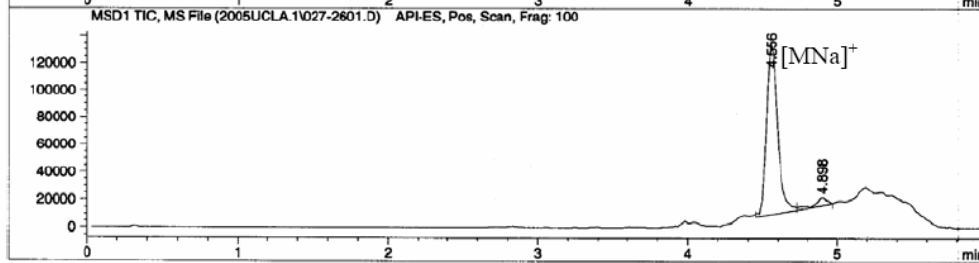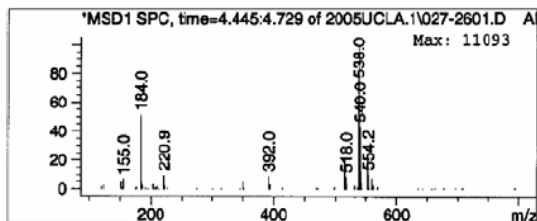



**4-Benzylsulfanyl-6-(3,4-dichlorophenyl)-1-(4-toluenesulfonyl)-piperidine-3-carboxylic acid (B01C13E06)**  
**Not included**

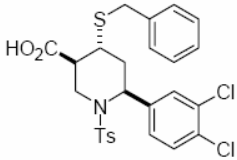

C<sub>26</sub>H<sub>25</sub>Cl<sub>2</sub>NO<sub>4</sub>S<sub>2</sub>  
 Exact Mass: 549.06  
 Mol. Wt.: 550.52

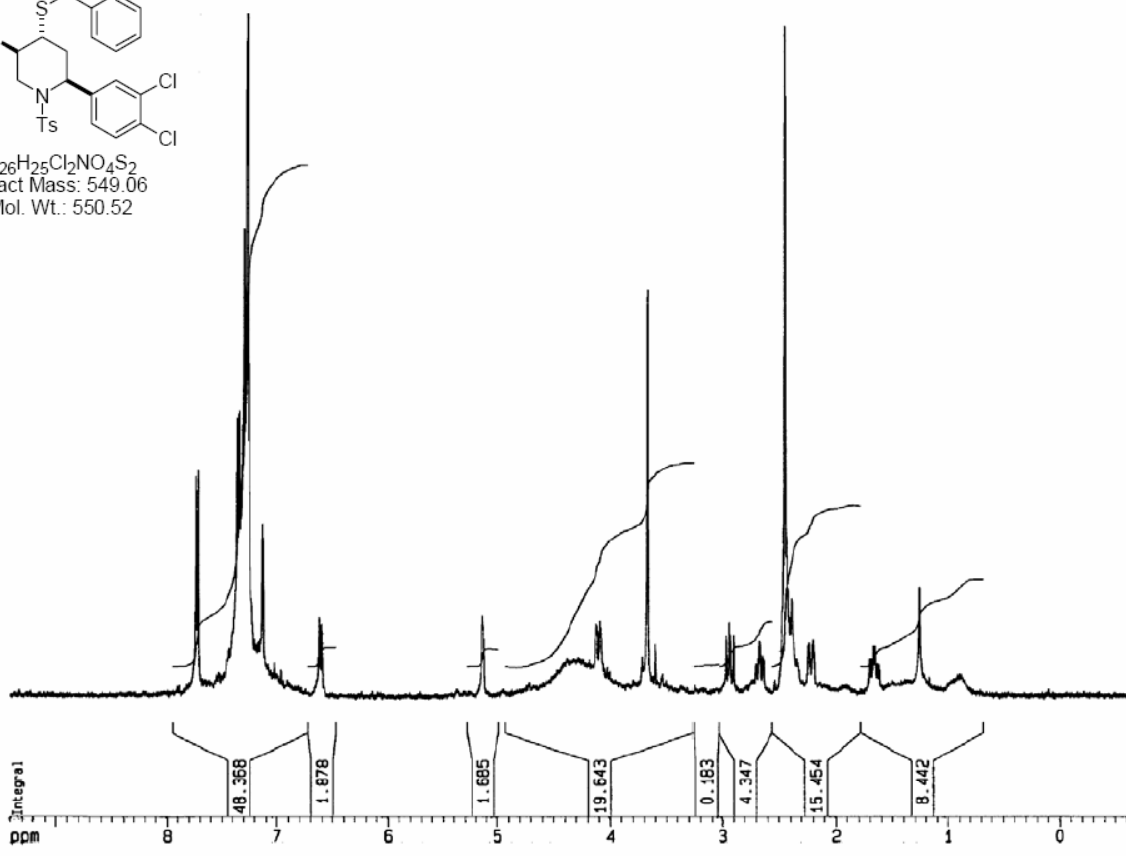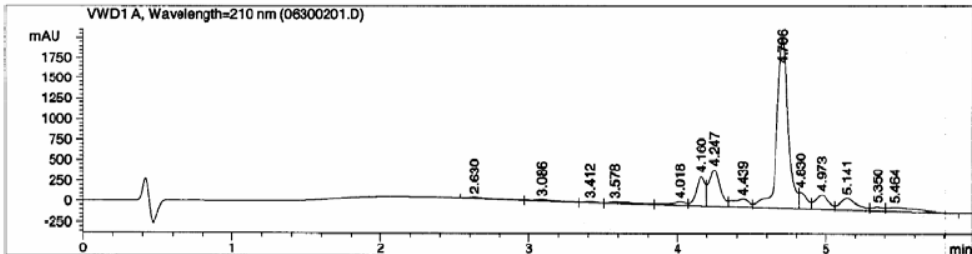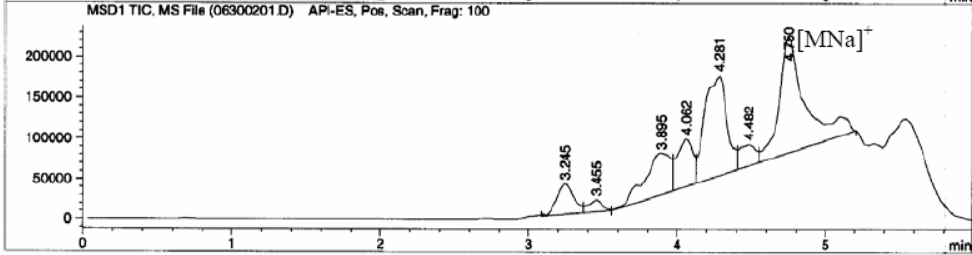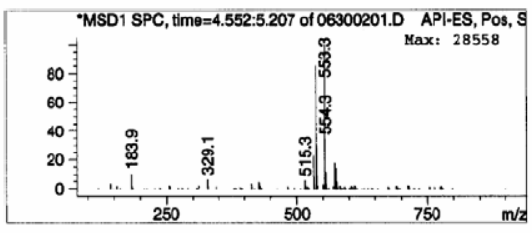

**4-Benzylsulfanyl-6-(4-bromophenyl)-1-(4-toluenesulfonyl)-piperidine-3-carboxylic acid (B01C14E06)**  
**Not included**

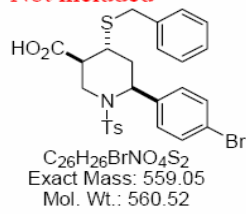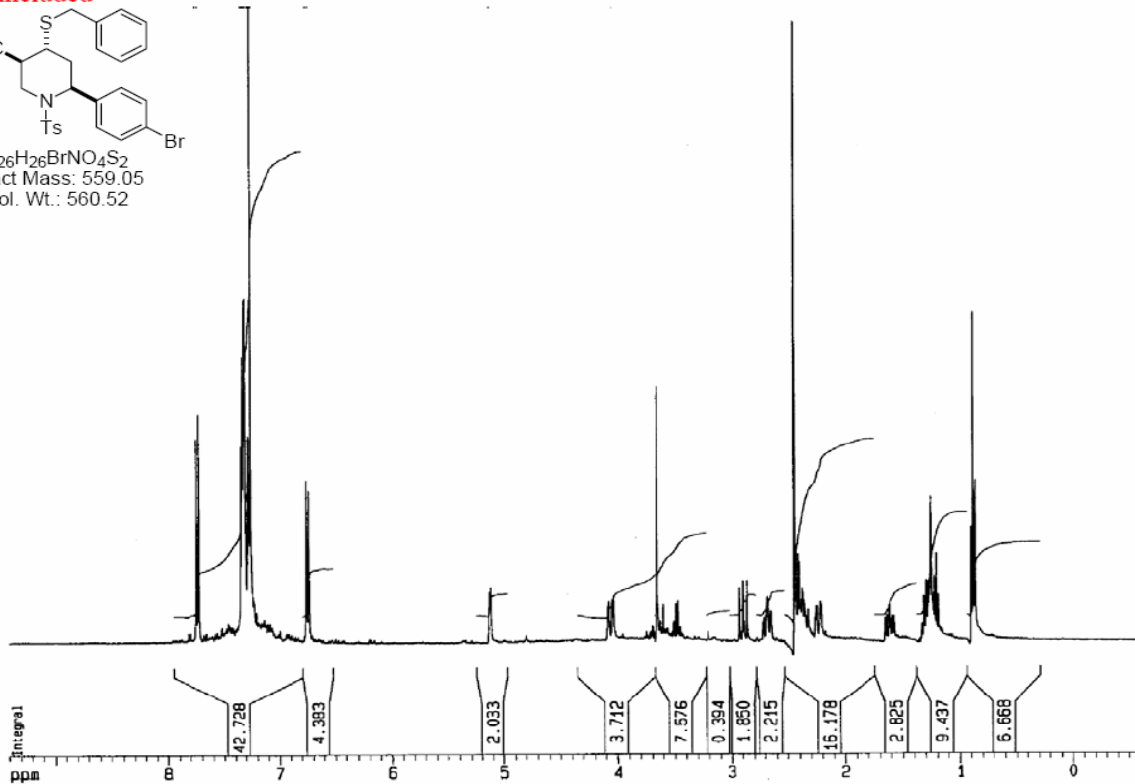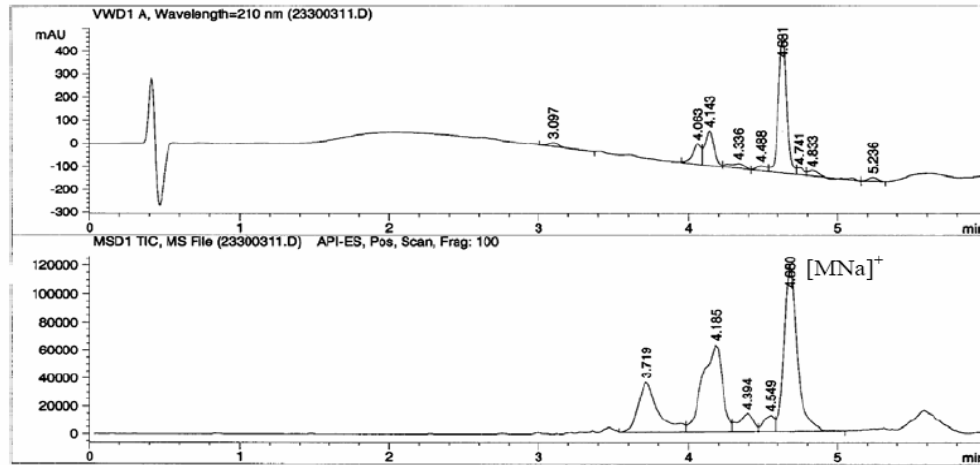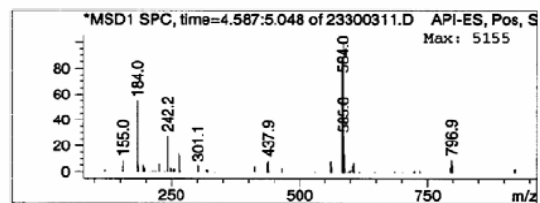

**Component 3: Peak at Scan 261.6. Top ions are 584 582 583**

4-Benzylsulfanyl-6-(3-bromophenyl)-1-(4-toluenesulfonyl)-piperidine-3-carboxylic acid (B01C15E06)

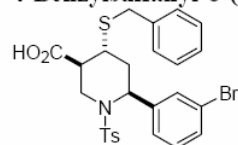

C<sub>26</sub>H<sub>26</sub>BrNO<sub>4</sub>S<sub>2</sub>  
 Exact Mass: 559.05  
 Mol. Wt.: 560.52

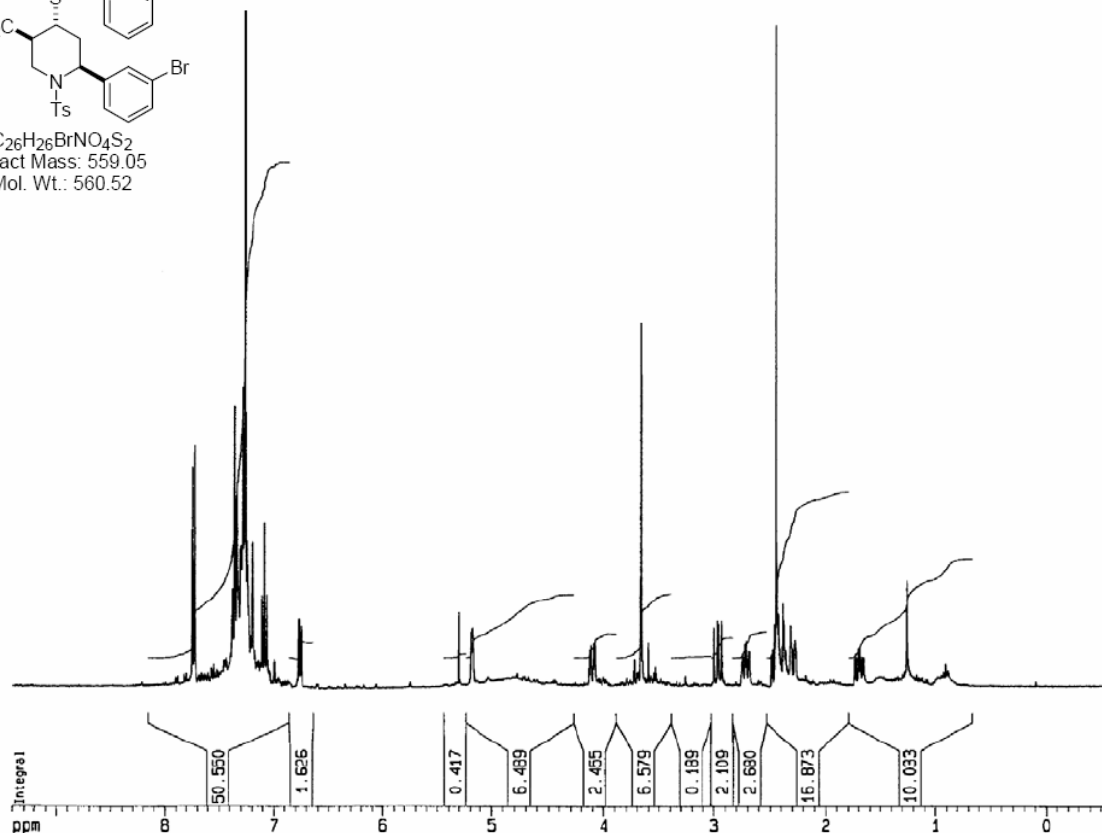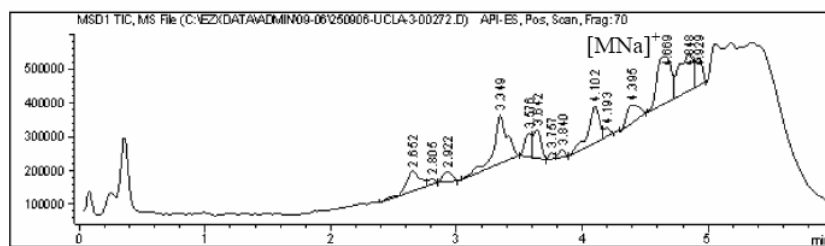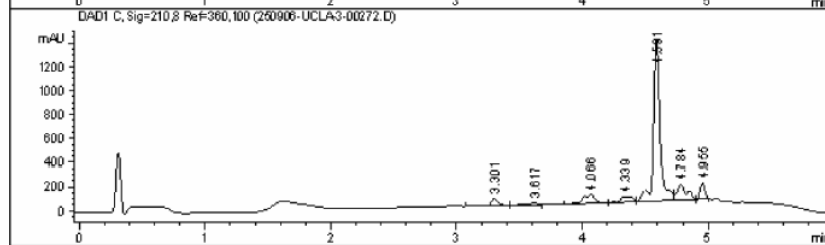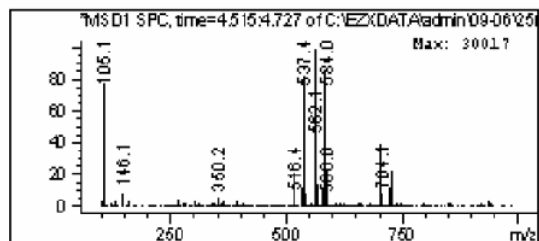

Component 2: Peak at Scan 260.8. Top ions are 562 560 584

# 4-Benzylsulfanyl-1-methanesulfonyl-6-phenylpiperidine-3-carboxylic acid (B01C19E06)

Not included

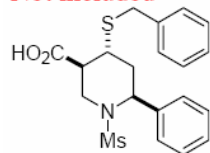

C<sub>20</sub>H<sub>23</sub>NO<sub>4</sub>S<sub>2</sub>  
Exact Mass: 405.11  
Mol. Wt.: 405.53

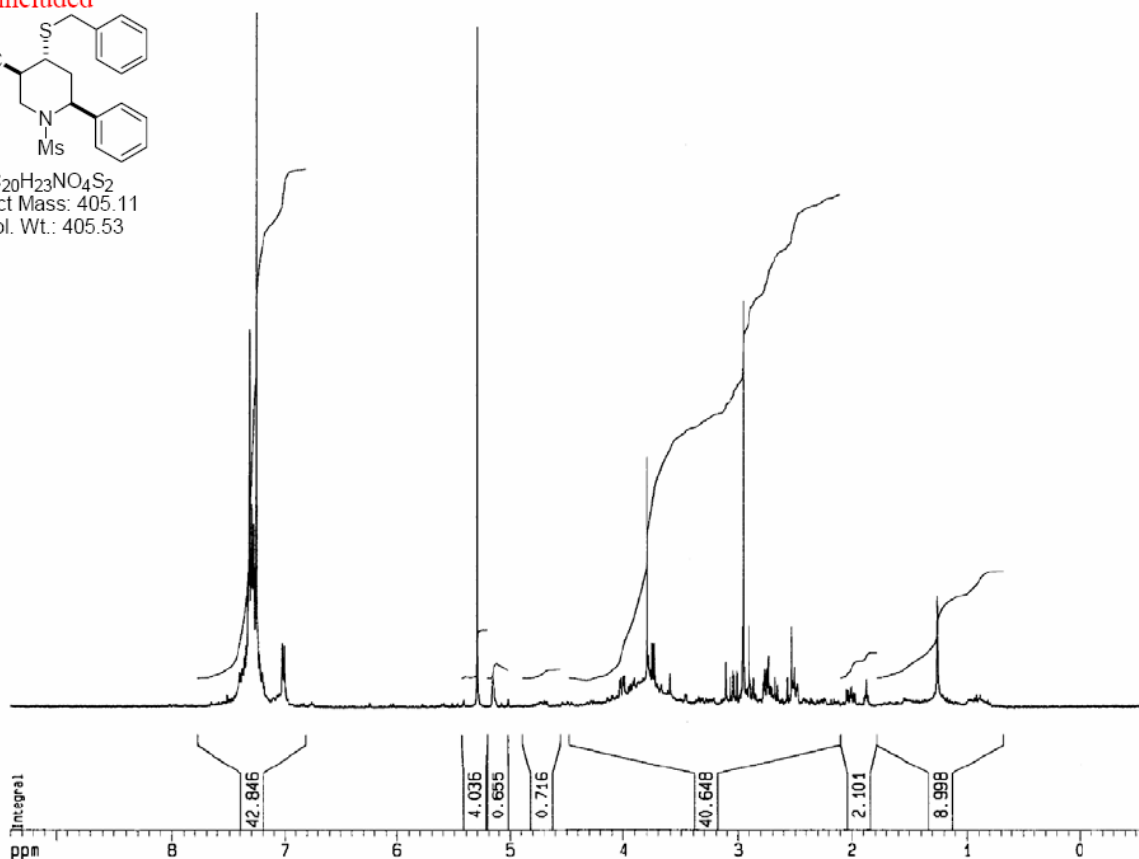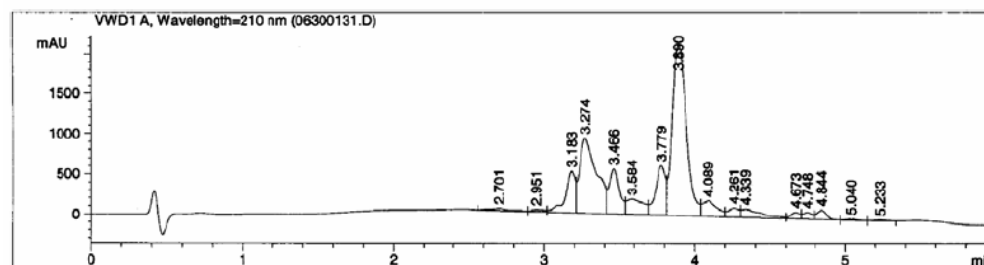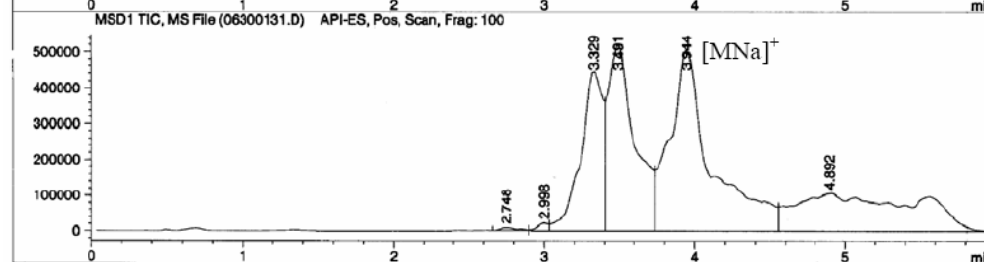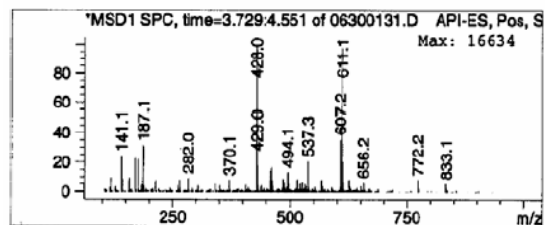

4-Benzylsulfanyl-6-(3,4-dimethoxyphenyl)-1-(4-toluenesulfonyl)-piperidine-3-carboxylic acid (B01C20E06)

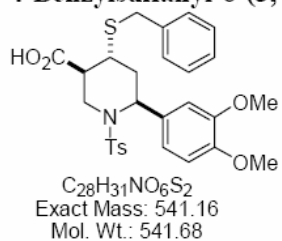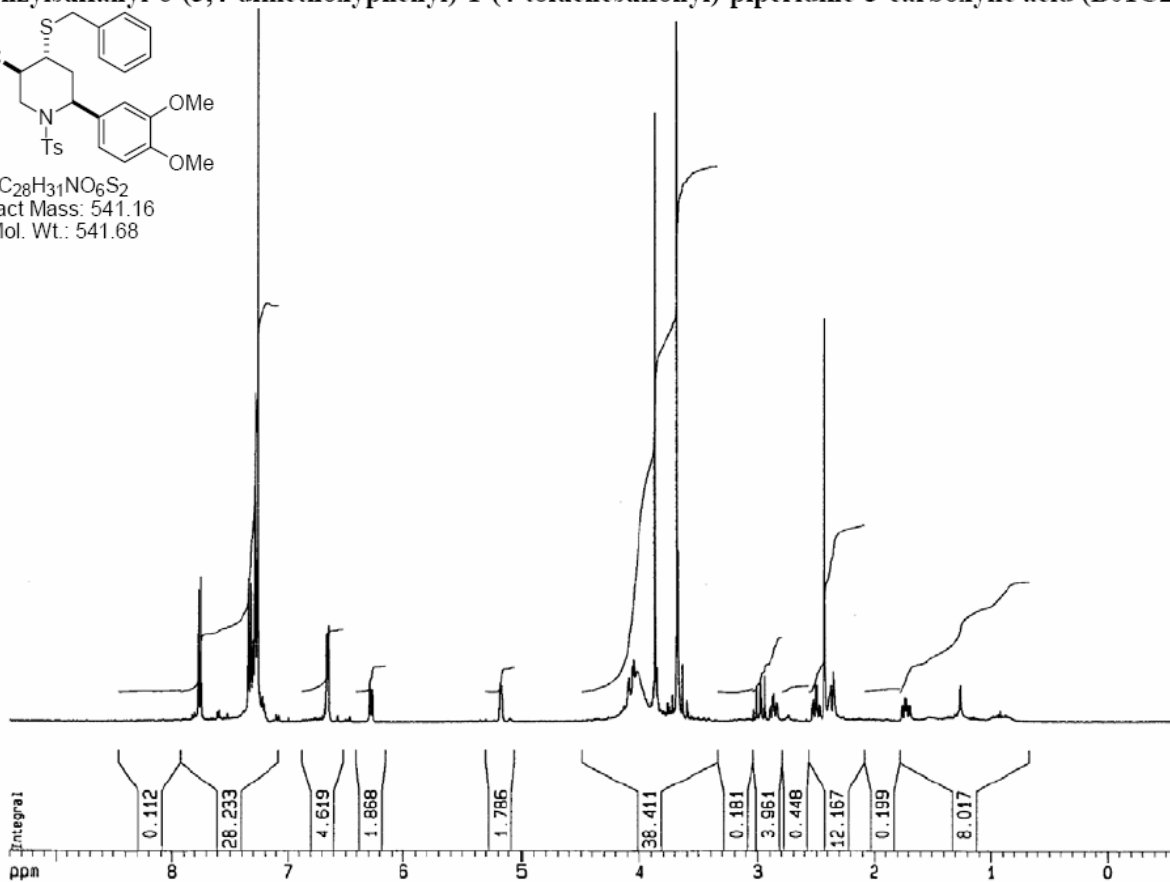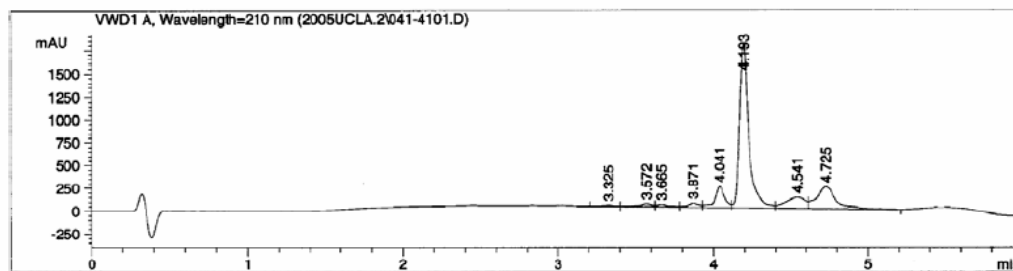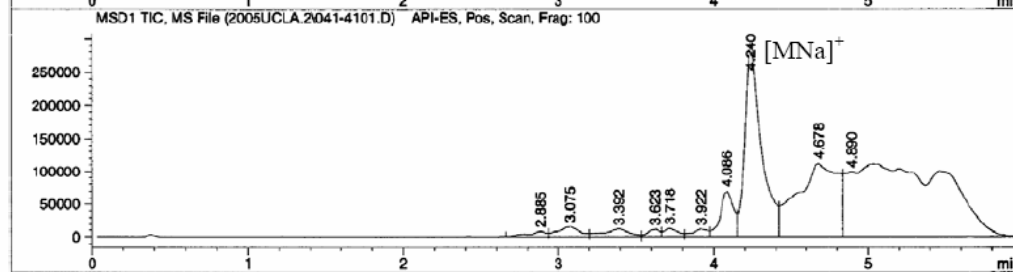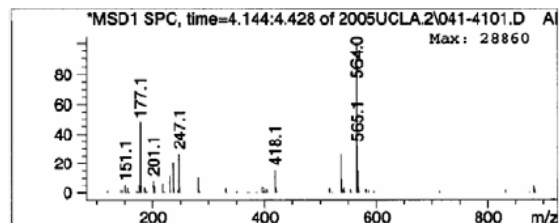

4-Benzylsulfanyl-6-(thiophen-2-yl)-1-(4-toluenesulfonyl)-piperidine-3-carboxylic acid (B01C21E06)

Not included

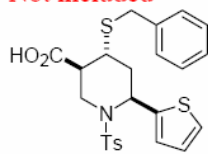

C<sub>24</sub>H<sub>25</sub>NO<sub>4</sub>S<sub>3</sub>  
Exact Mass: 487.09  
Mol. Wt.: 487.65

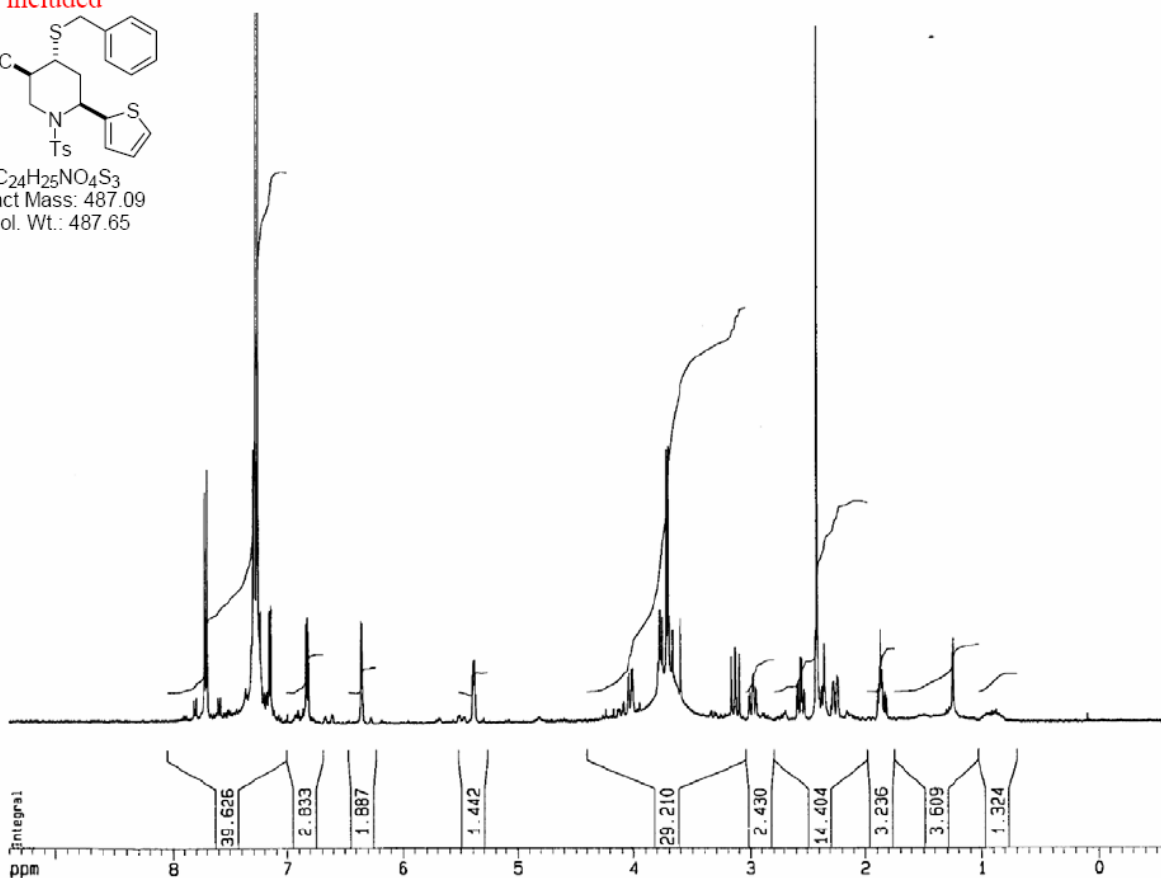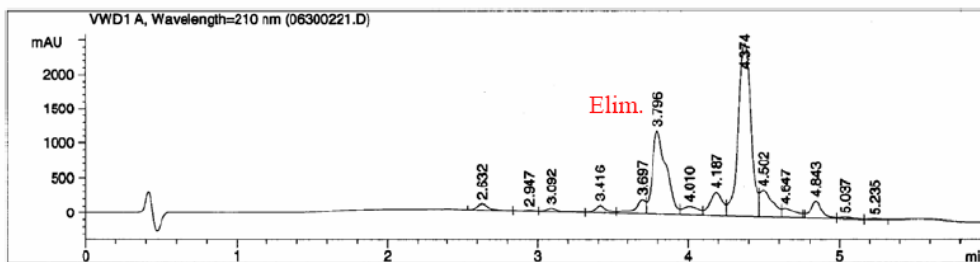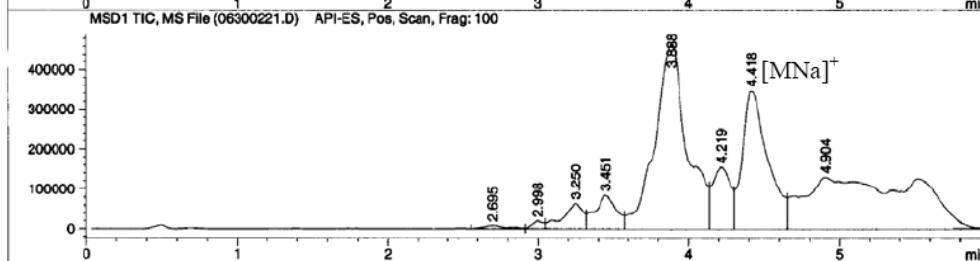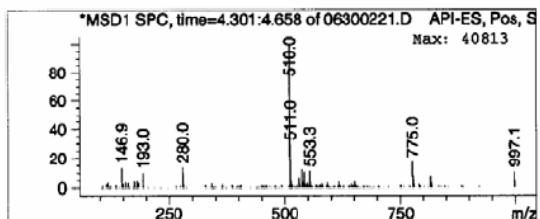

# 4-Benzylsulfanyl-6-(4-fluorophenyl)-1-(4-toluenesulfonyl)-piperidine-3-carboxylic acid (B01C23E06)

Not included

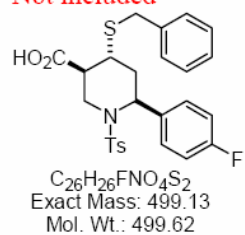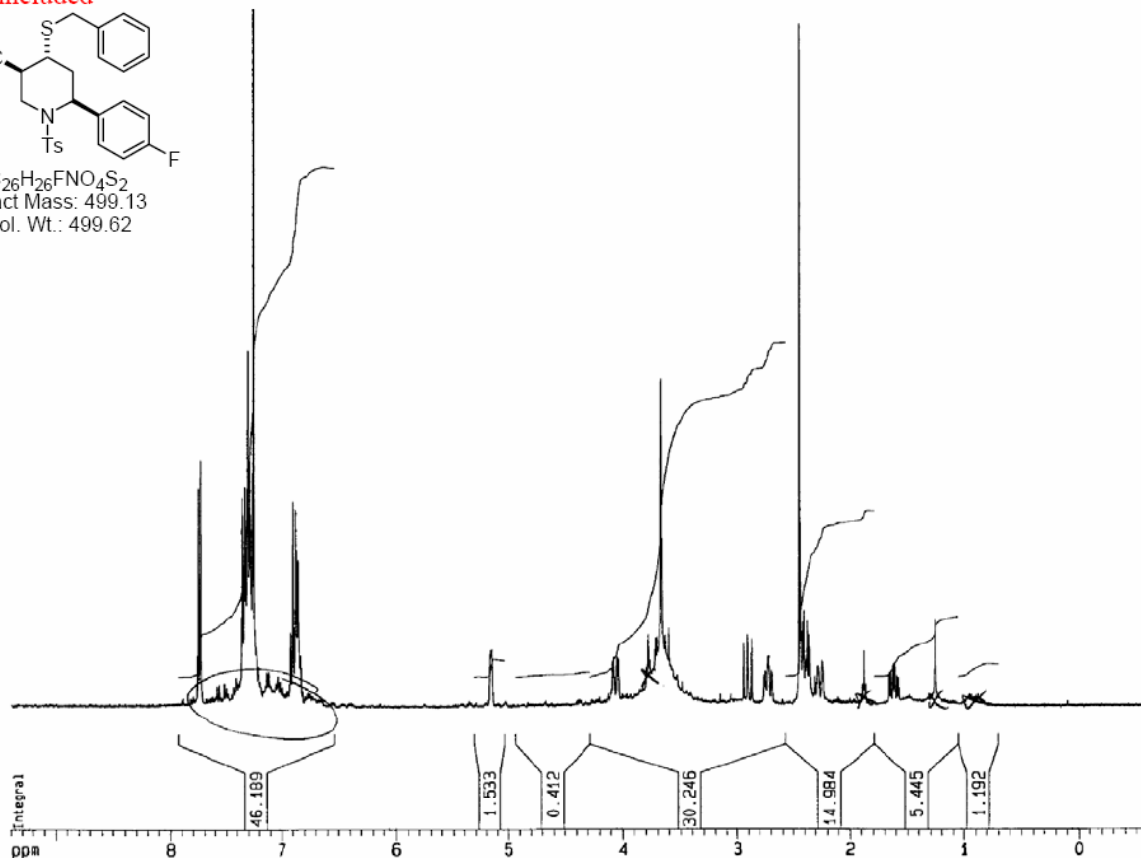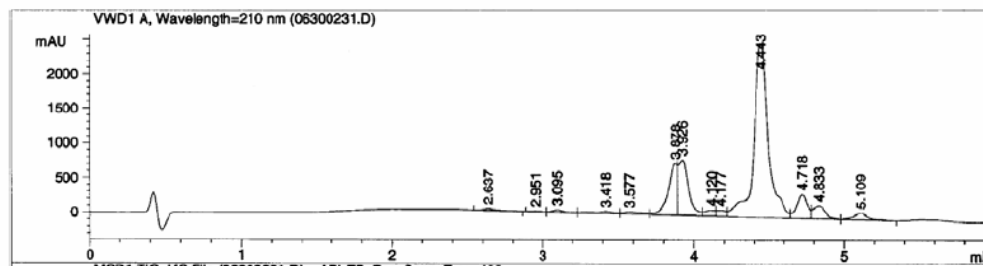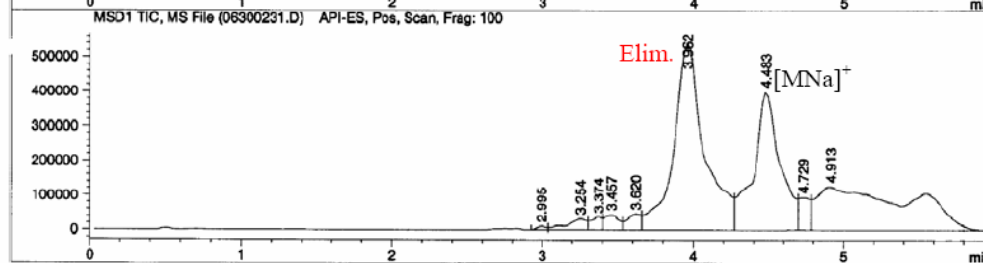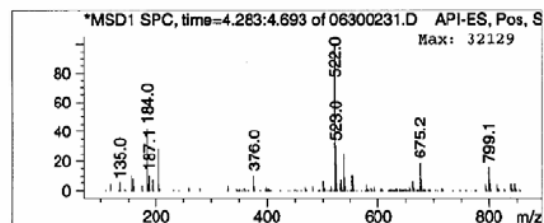

4-Benzylsulfanyl-6-(4-isopropylphenyl)-1-(4-toluenesulfonyl)-piperidine-3-carboxylic acid (B01C24E06)  
 Not included

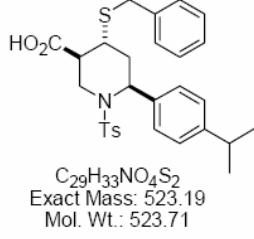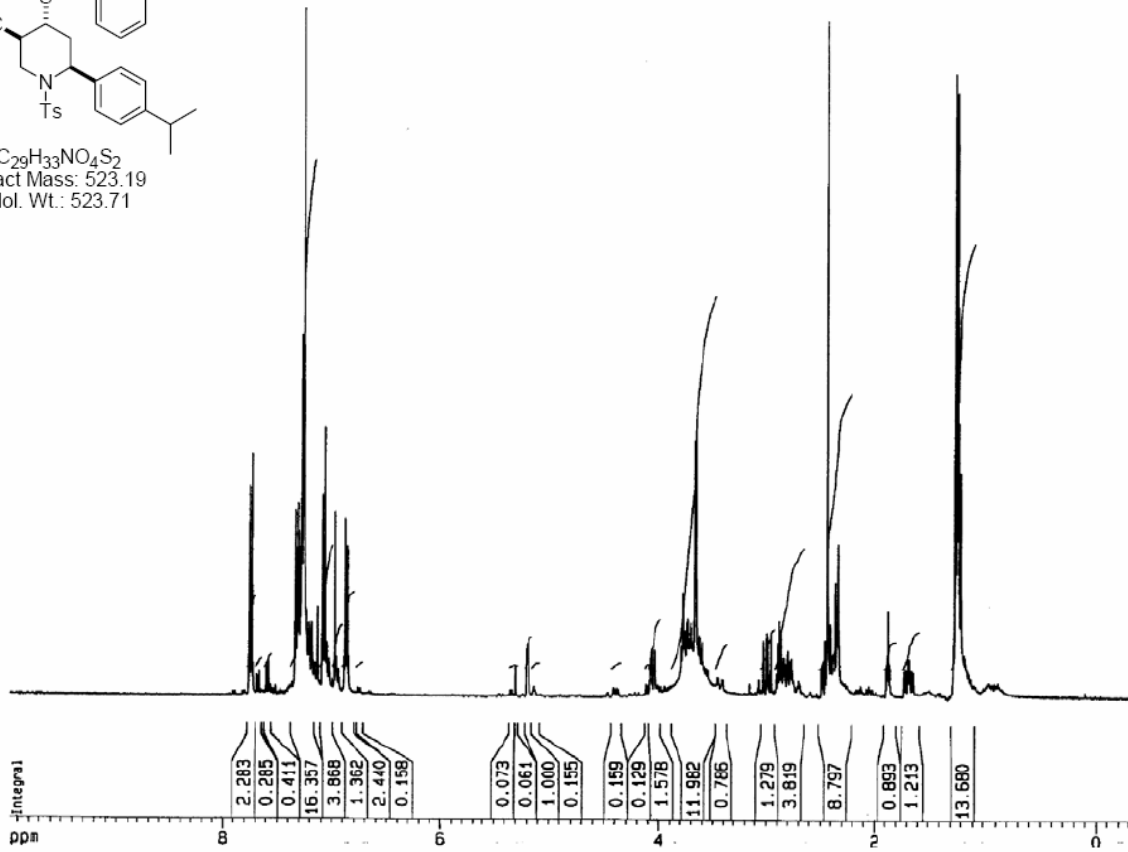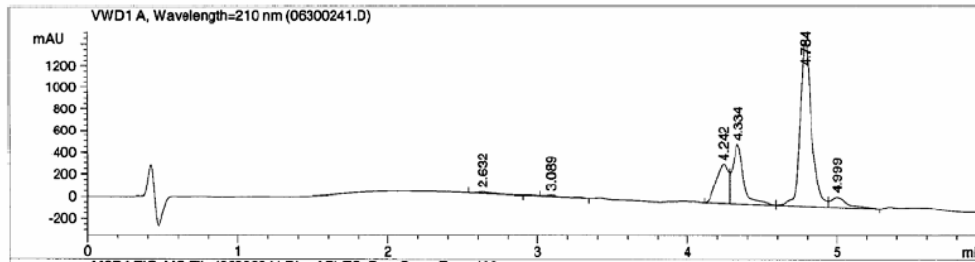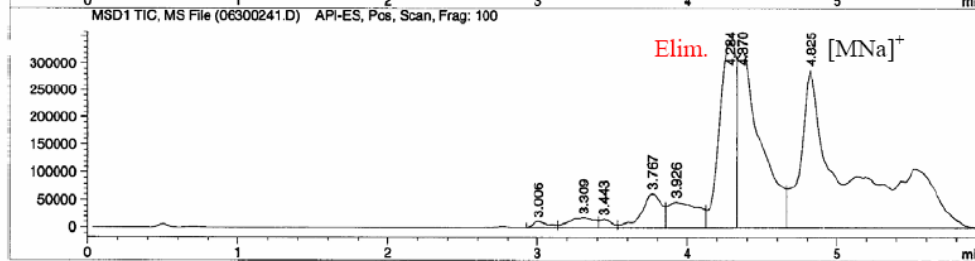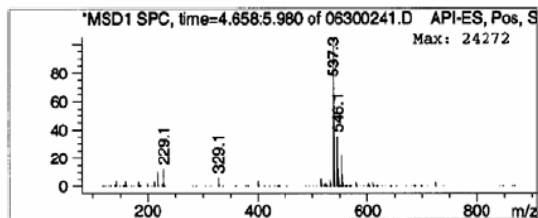



4-Benzylsulfanyl-1-(4-toluenesulfonyl)-6-(3,4,5-trimethoxyphenyl)-piperidine-3-carboxylic acid (B01C25E06)

acid

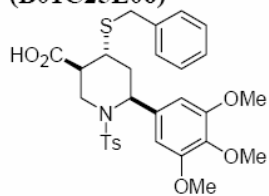

C<sub>29</sub>H<sub>33</sub>NO<sub>7</sub>S<sub>2</sub>  
 Exact Mass: 571.17  
 Mol. Wt.: 571.70

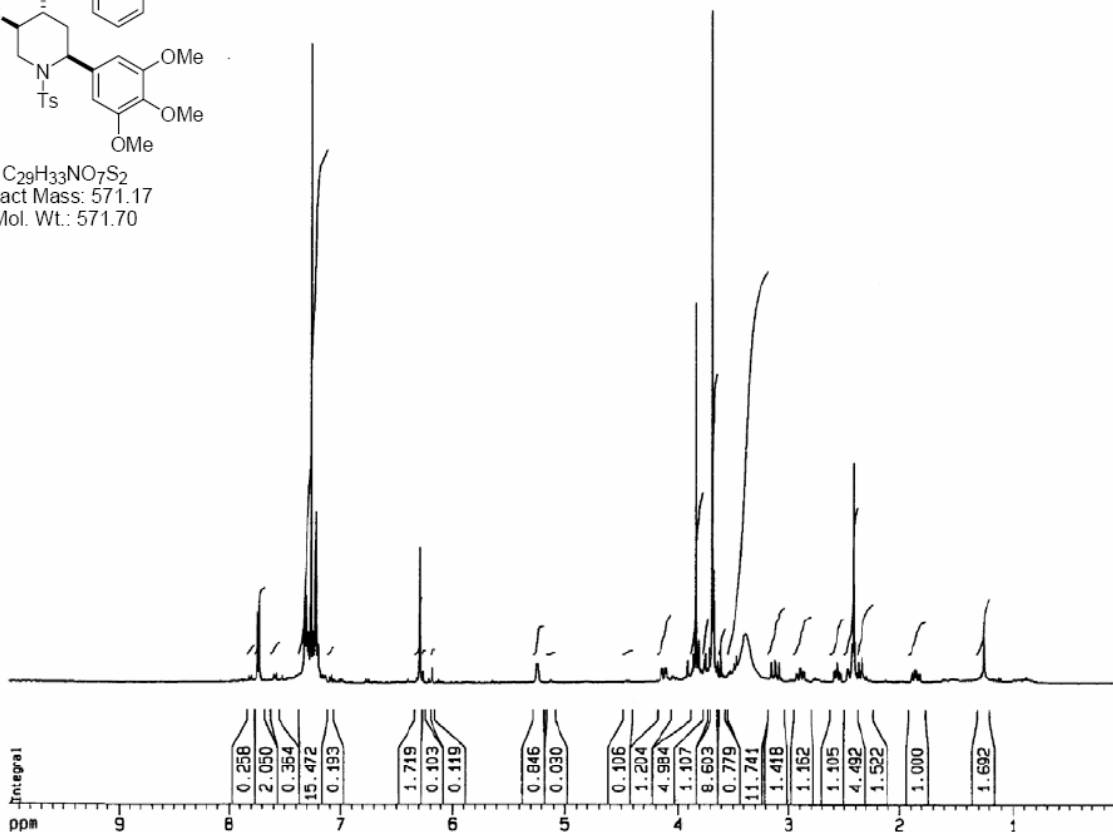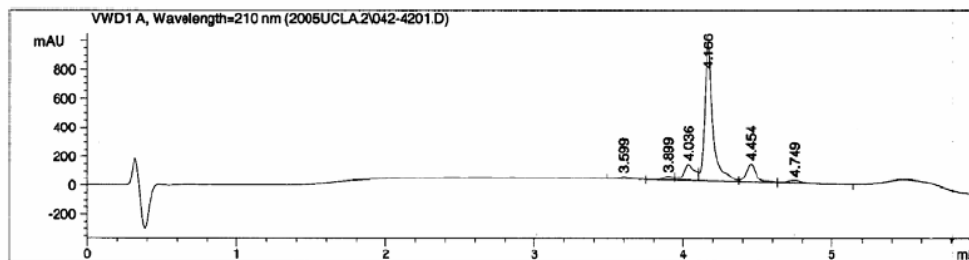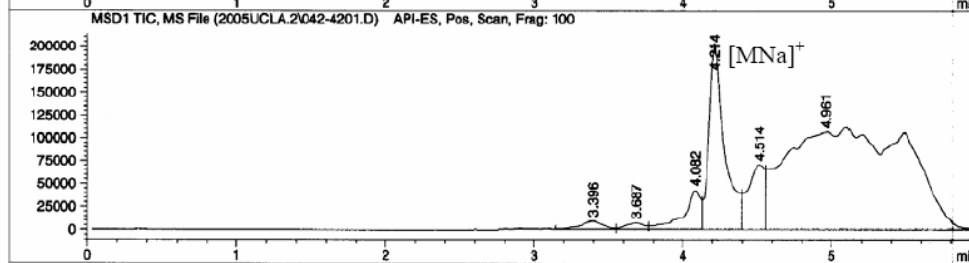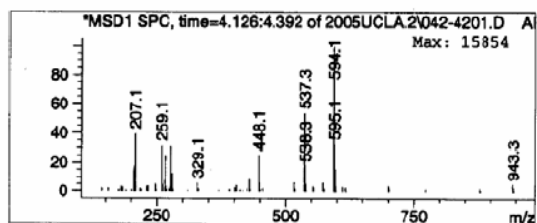

**4-Benzylsulfanyl-6-(3-fluorophenyl)-1-(4-toluenesulfonyl)-piperidine-3-carboxylic acid (B01C26E06)**  
**Not included**

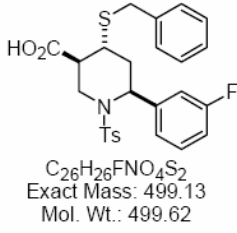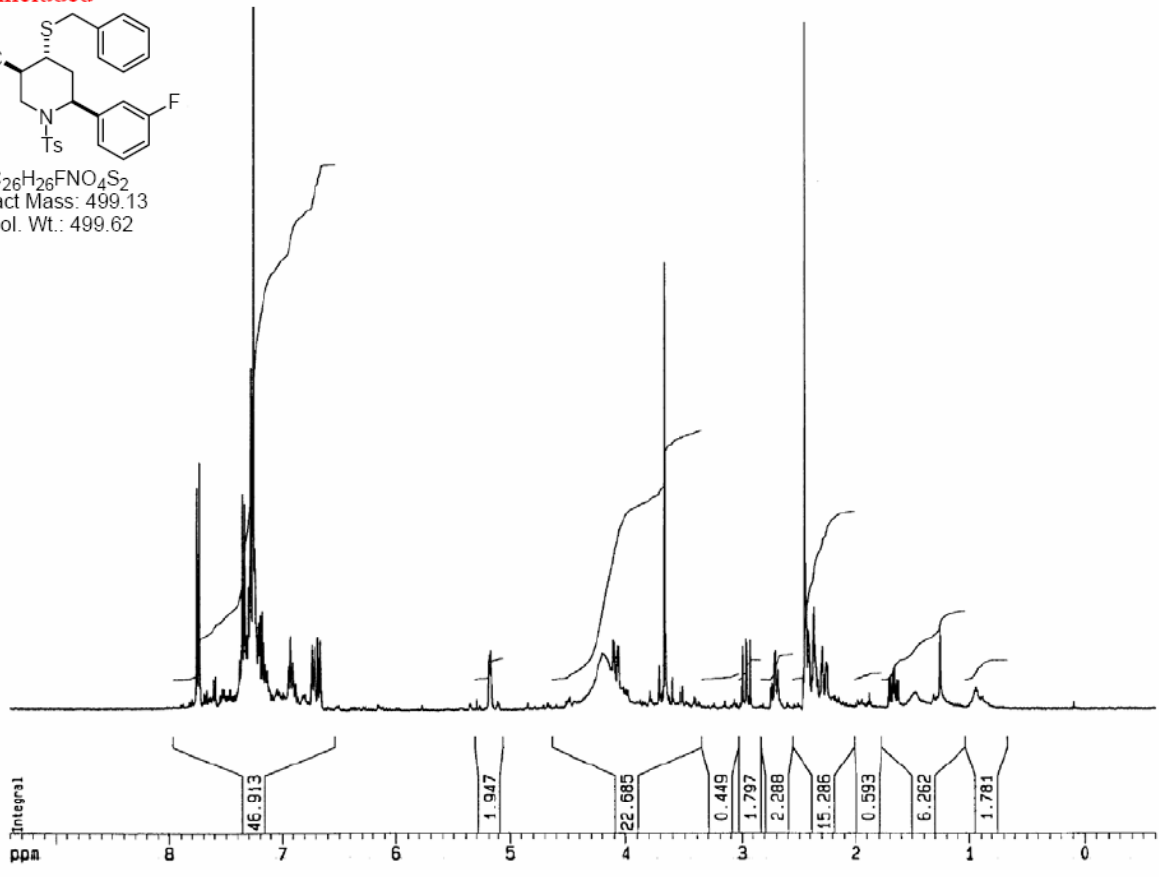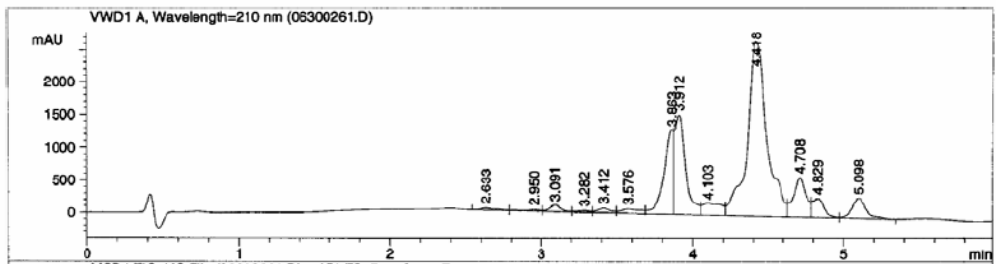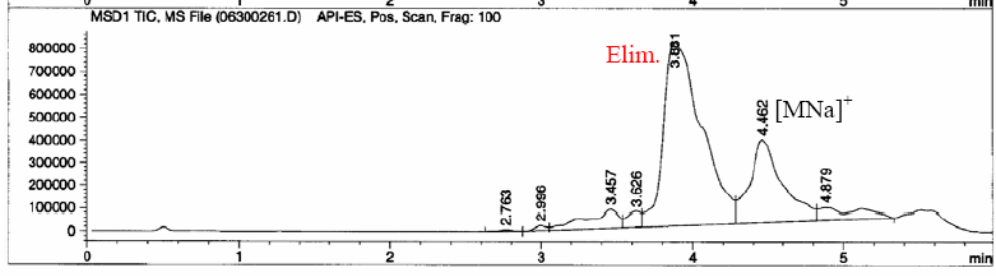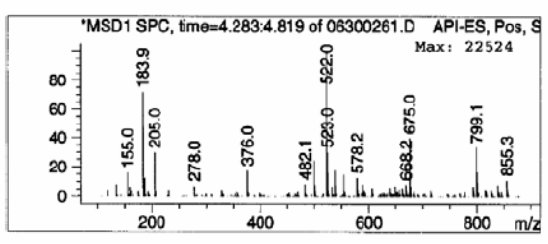

**1-Benzenesulfonyl-4-benzylsulfanyl-6-(4-chlorophenyl)-piperidine-3-carboxylic acid (B01C29E06)**  
 Not included

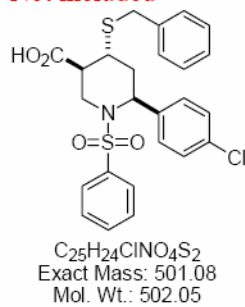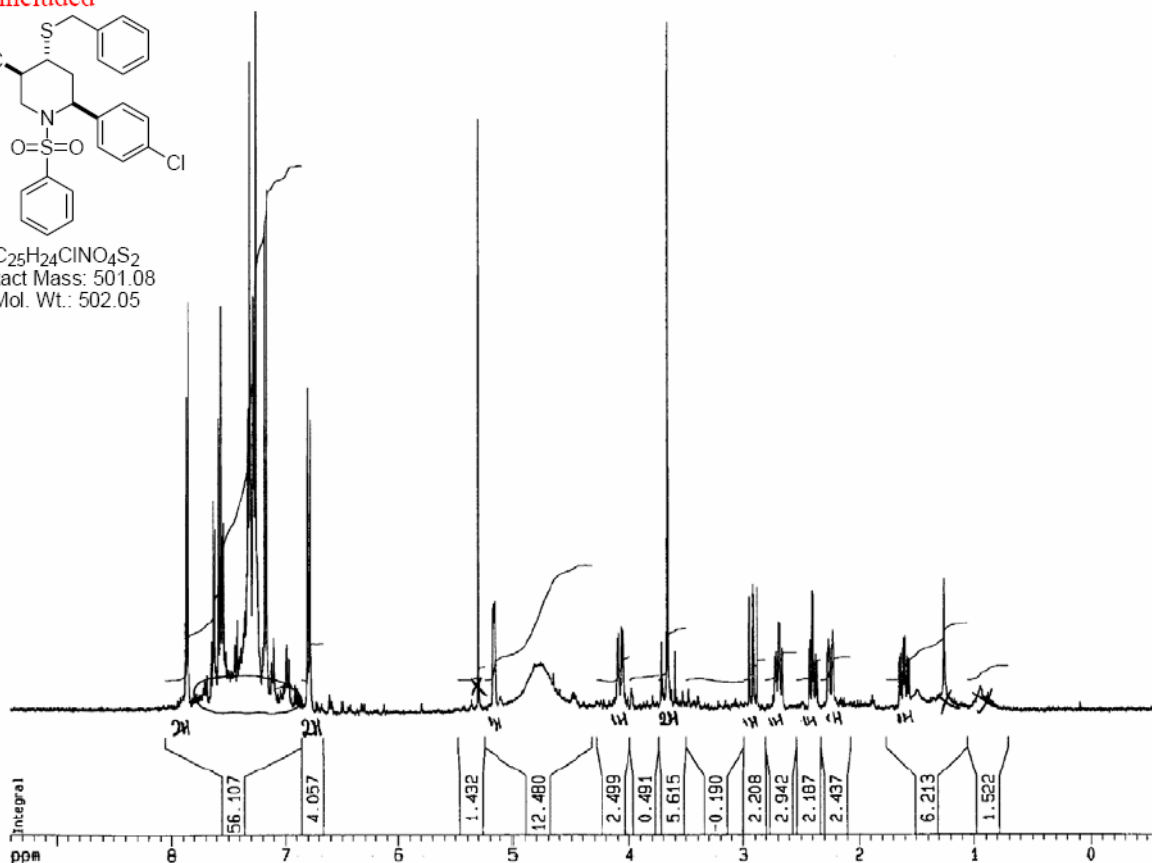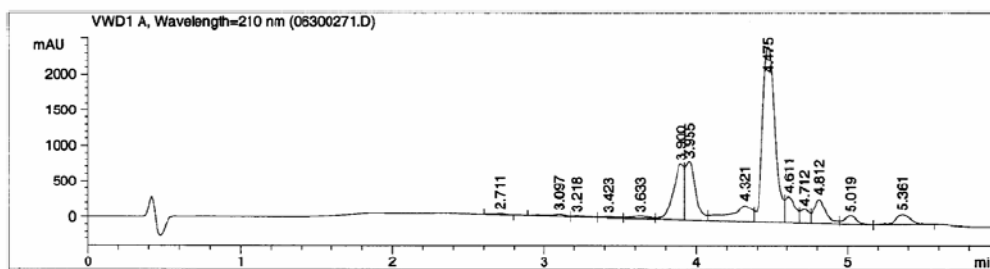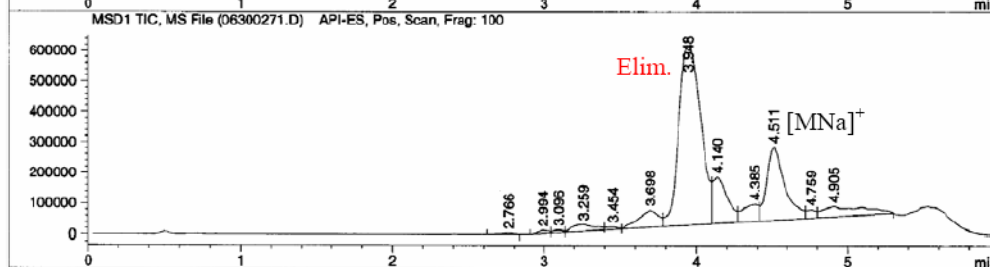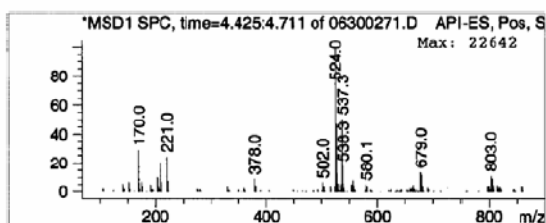

**4-Benzylsulfanyl-1-(4-chlorobenzenesulfonyl)-6-(p-tolyl)-piperidine-3-carboxylic acid (B01C30E06)**

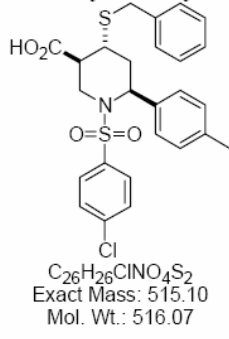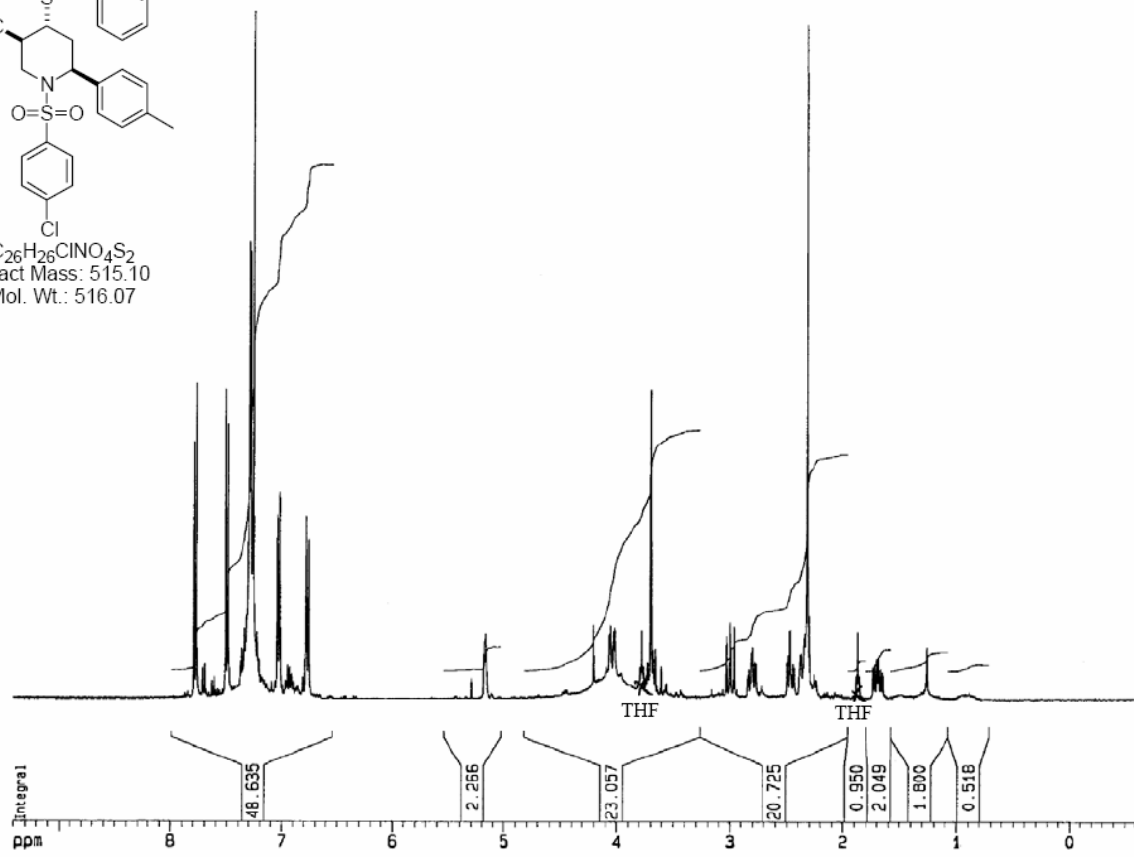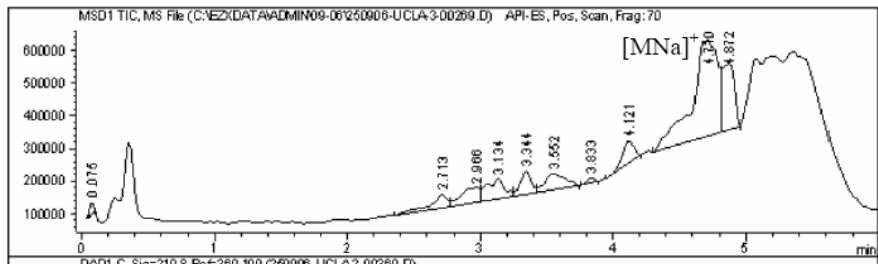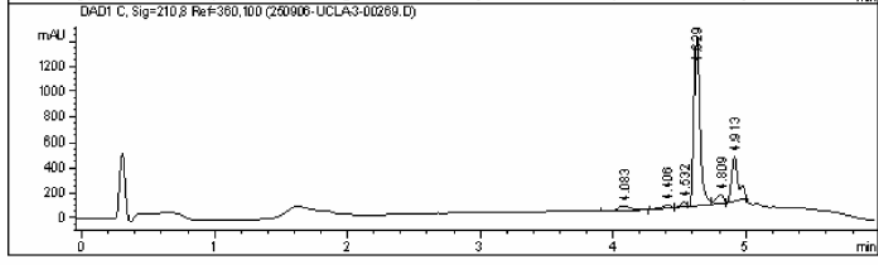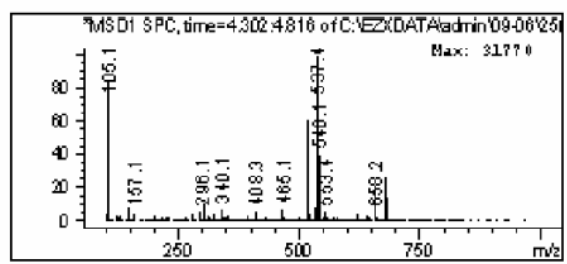

Peak #9 at 4.710 min ( 4.302 to 4.816 min)  
 -> The analysis found 3 components, indicating an impure peak. <-

Component 1: Peak at Scan 248.8, Top ions are 678 656  
 Component 2: Peak at Scan 262.9, Top ions are 538 516 540  
 Component 3: Peak at Scan 268.1, Top ions are 537 301

4-Benzylsulfanyl-1-(4-toluenesulfonyl)-6-(*m*-tolyl)-piperidine-3-carboxylic acid (B01C33E06)

Not included

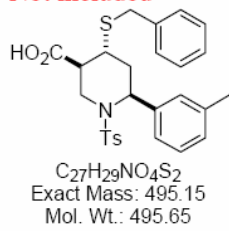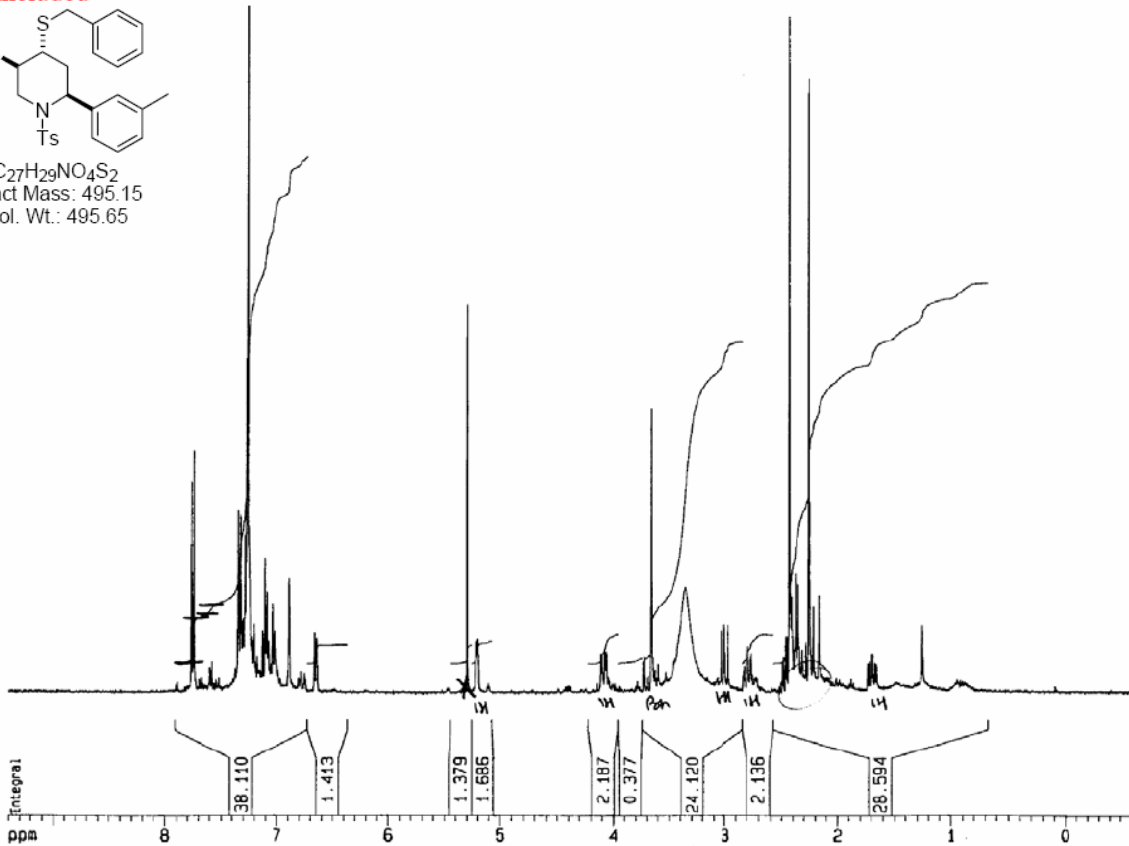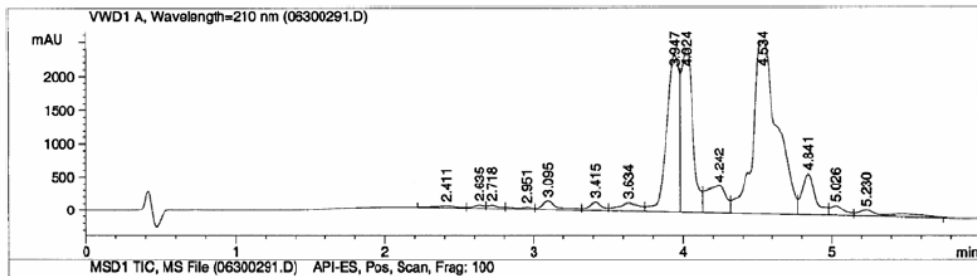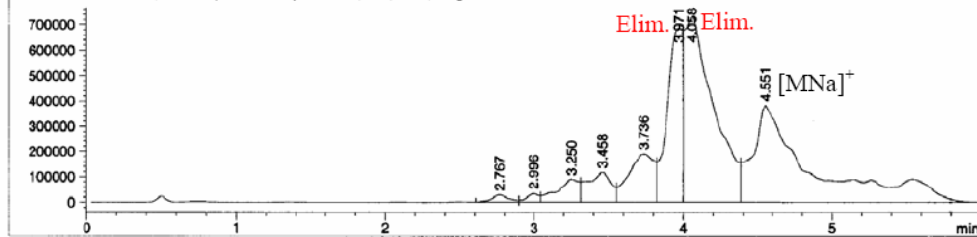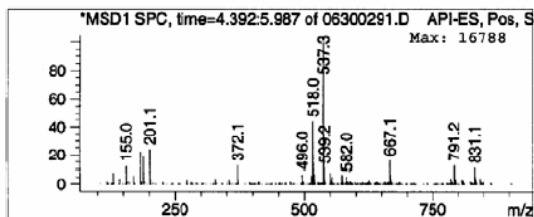

1-Benzenesulfonyl-4-benzylsulfanyl-6-(4-methoxyphenyl)-piperidine-3-carboxylic acid (B01C35E06)

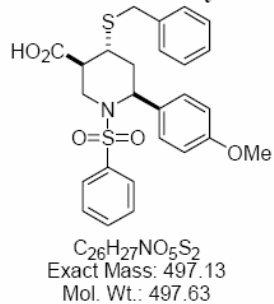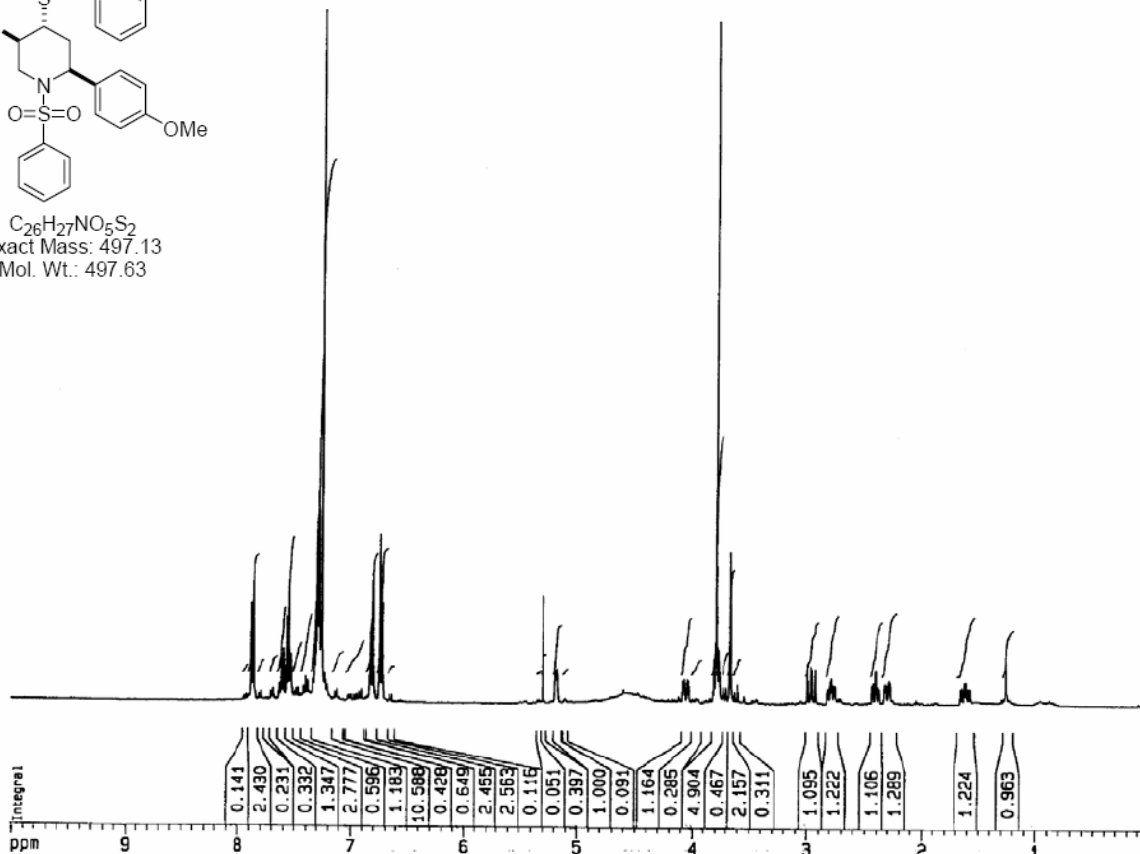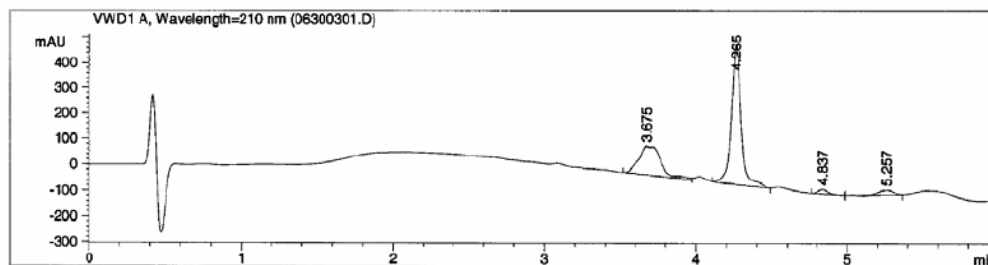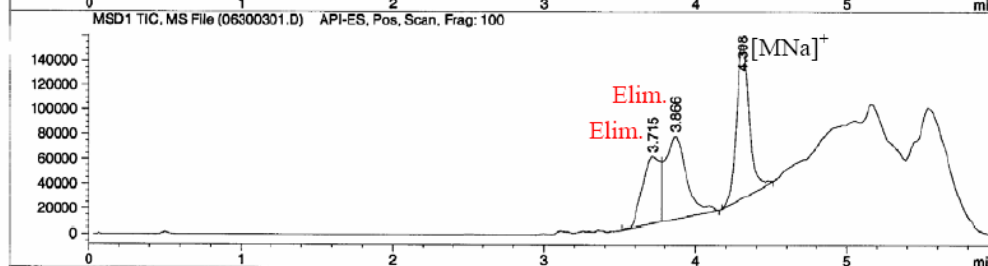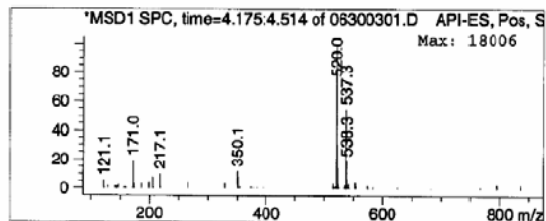

4-Benzylsulfanyl-1-(4-chlorobenzenesulfonyl)-6-(4-methoxyphenyl)-piperidine-3-carboxylic acid (B01C37E06)

acid

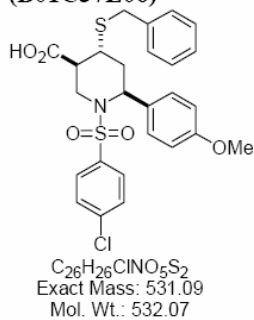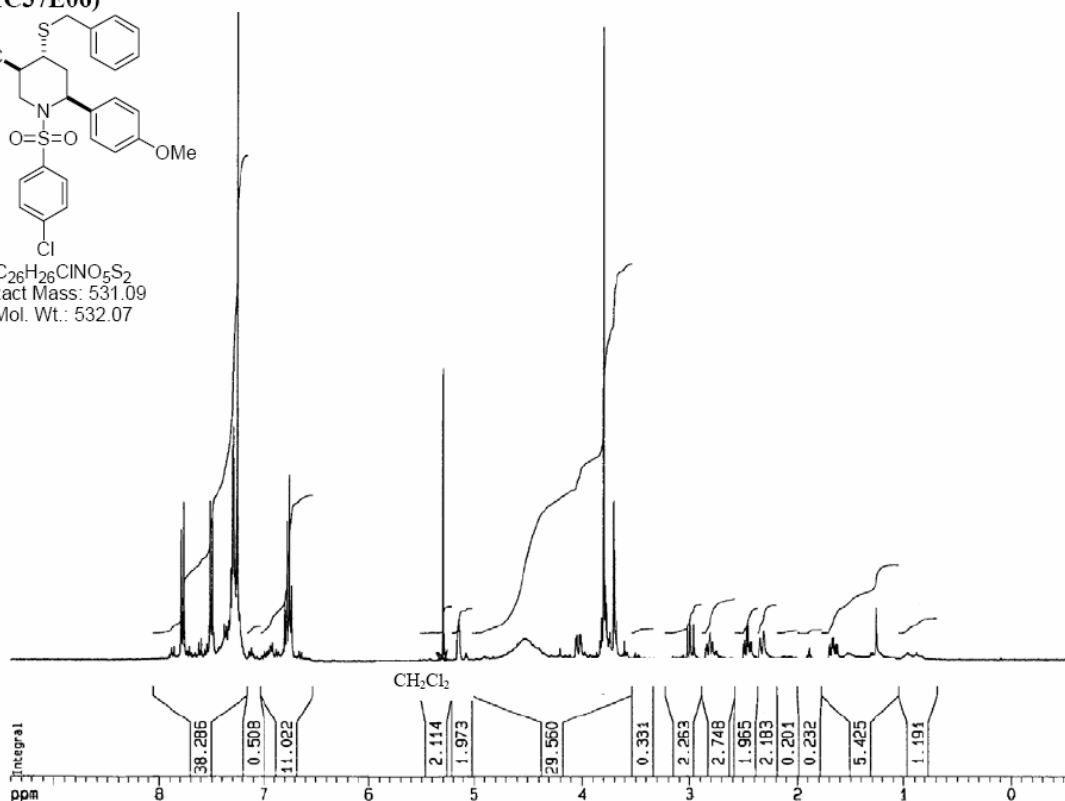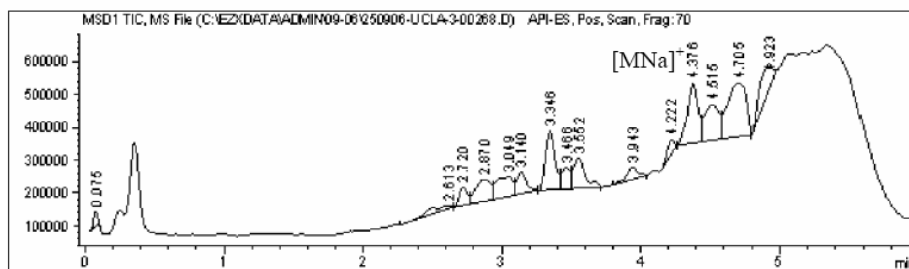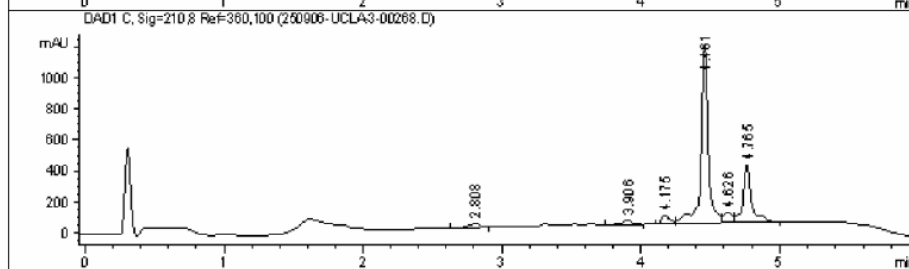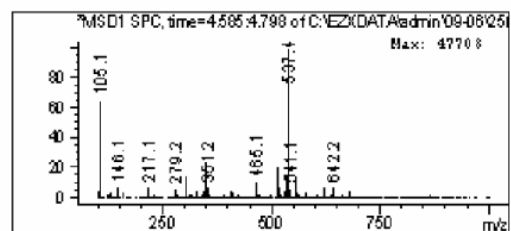

Component 1: Peak at Scan 253.2. Top ions are 554 532 534

4-Benzylsulfanyl-6-(4-methoxyphenyl)-1-(2-toluenesulfonyl)-piperidine-3-carboxylic acid (B01C38E06)

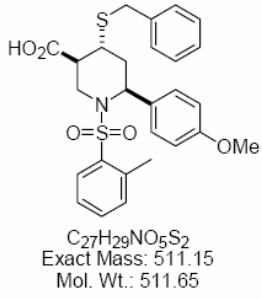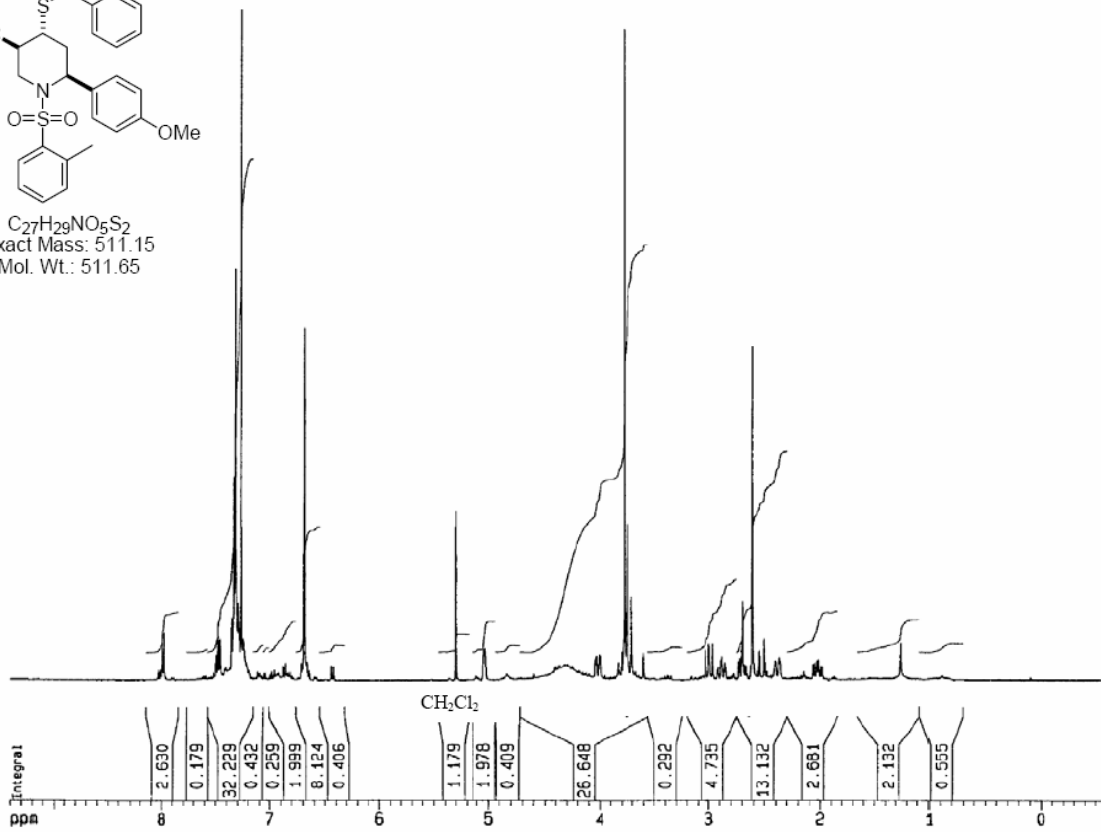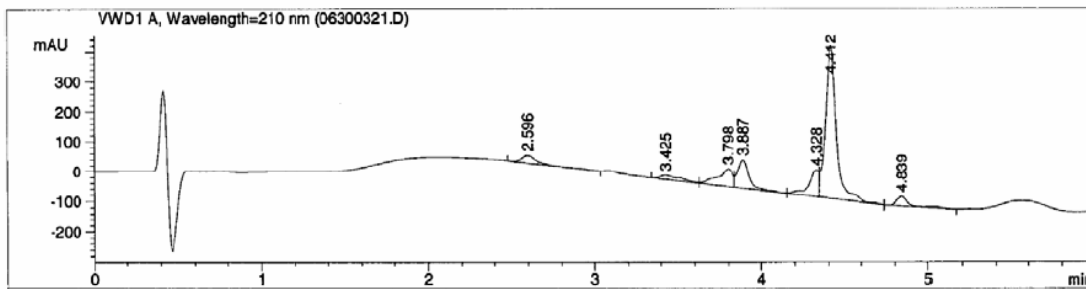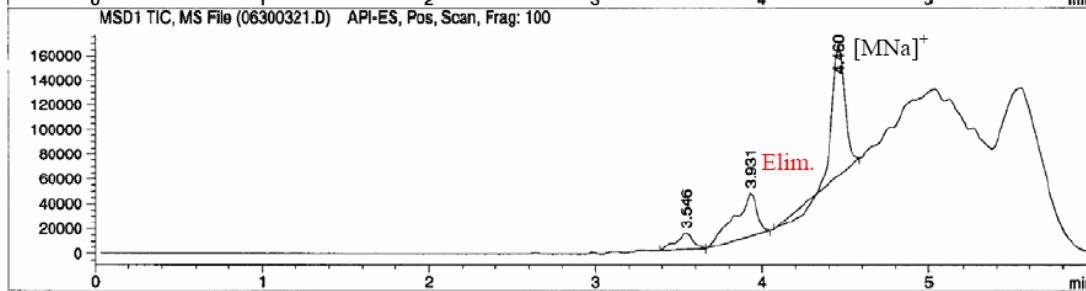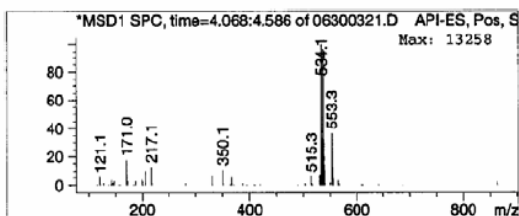



4-Benzylsulfaul-6-(3-methoxyphenyl)-1-(4-toluenesulfonyl)-piperidine-3-carboxylic acid (B01C39E06)

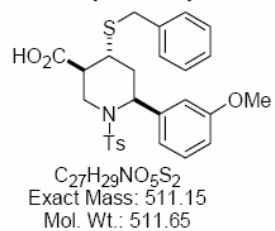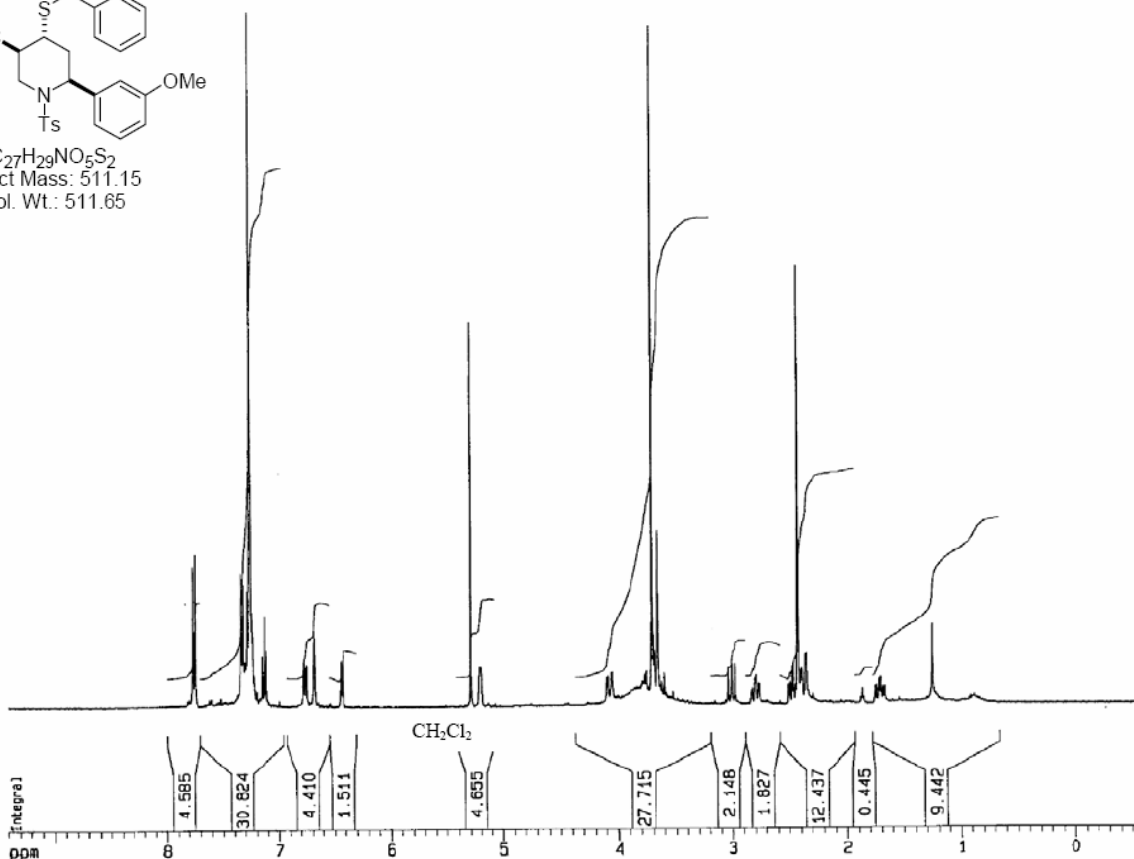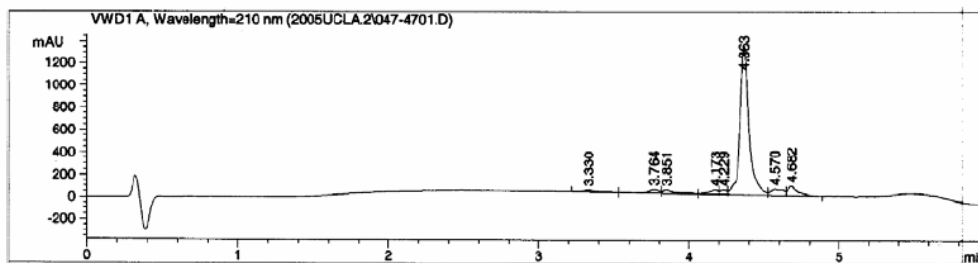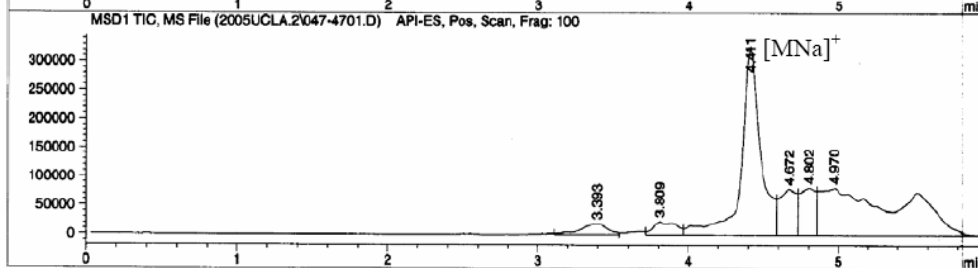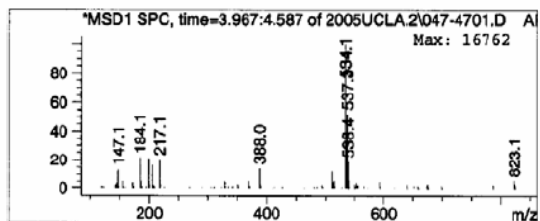

4-Benzylsulfanyl-6-(4-chlorophenyl)-1-(2-toluenesulfonyl)-piperidine-3-carboxylic acid (B01C40E06)

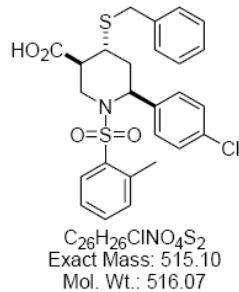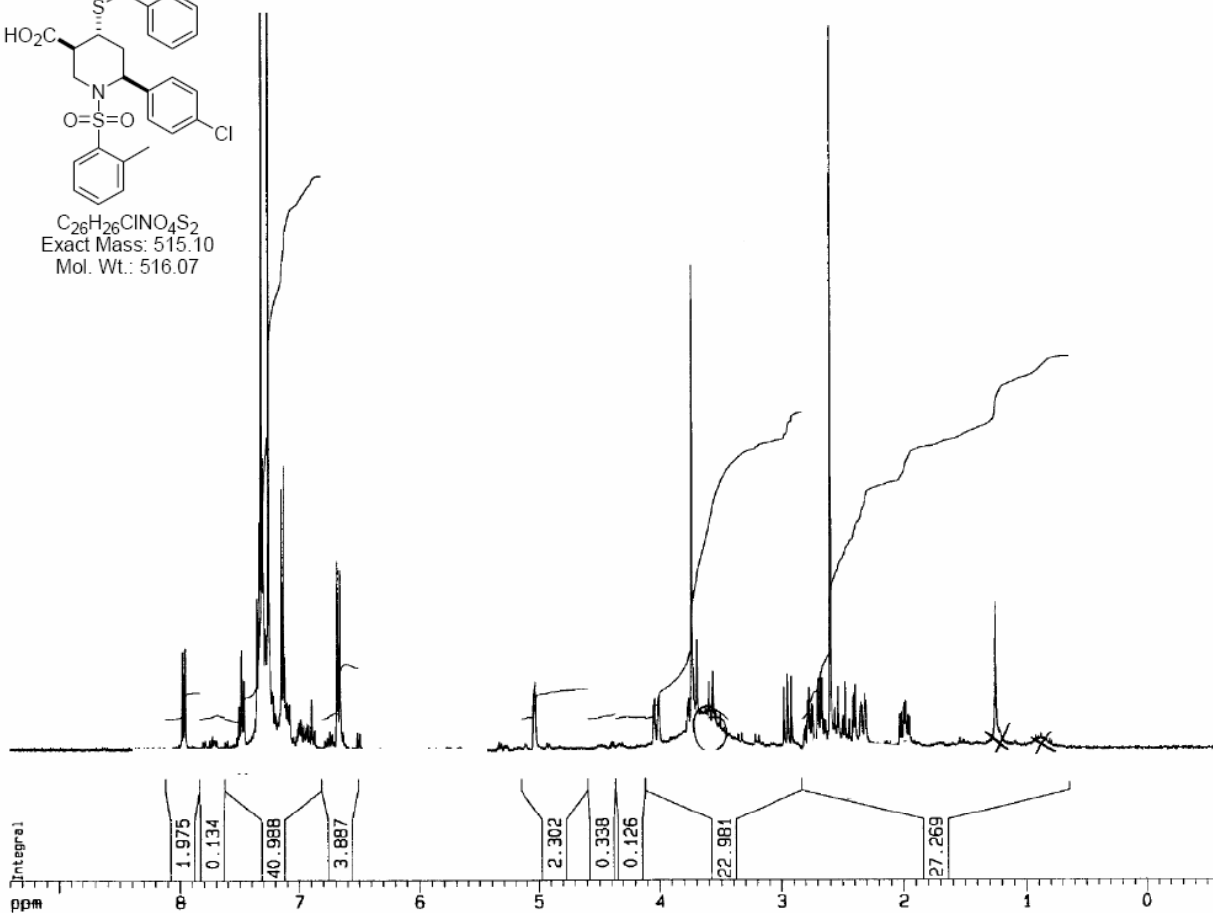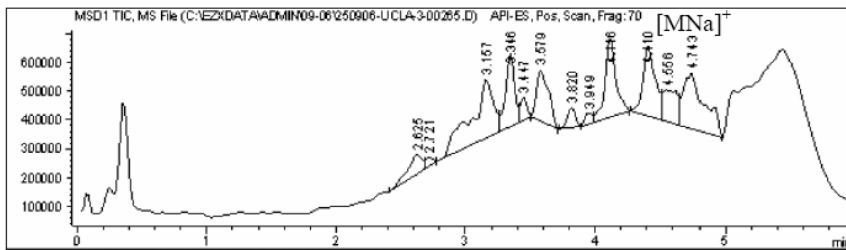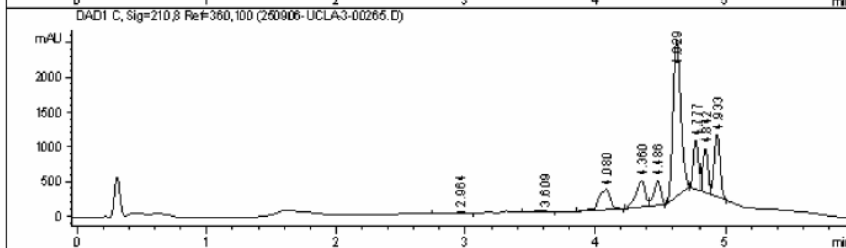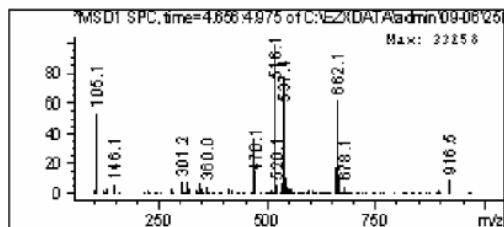

4-Benzylsulfanyl-1-(2-toluenesulfonyl)-6-(*p*-tolyl)piperidine-3-carboxylic acid (B01C41E06)

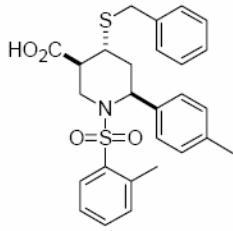

C<sub>27</sub>H<sub>29</sub>NO<sub>4</sub>S<sub>2</sub>  
 Exact Mass: 495.15  
 Mol. Wt.: 495.65

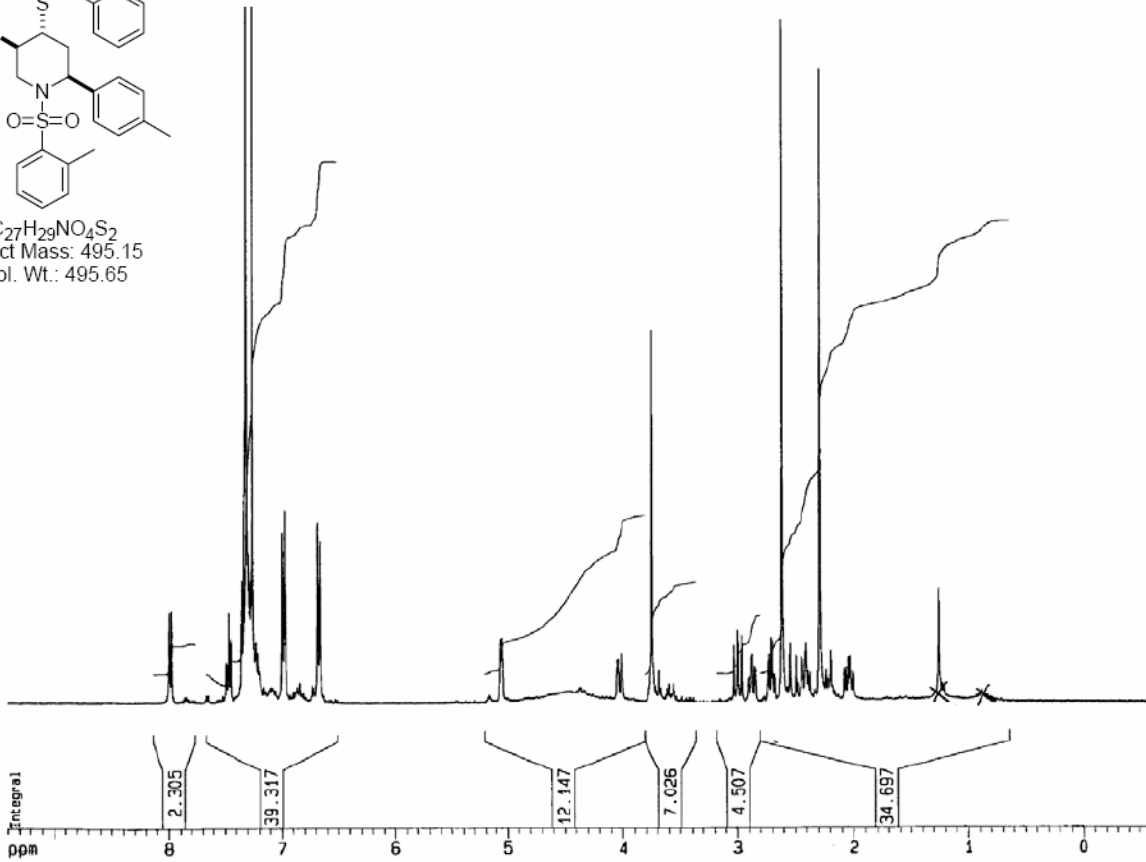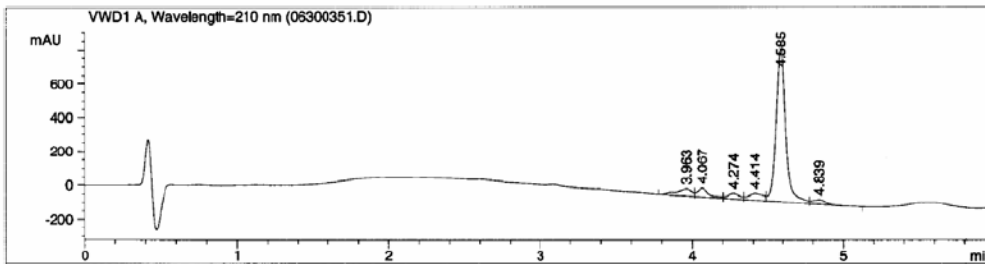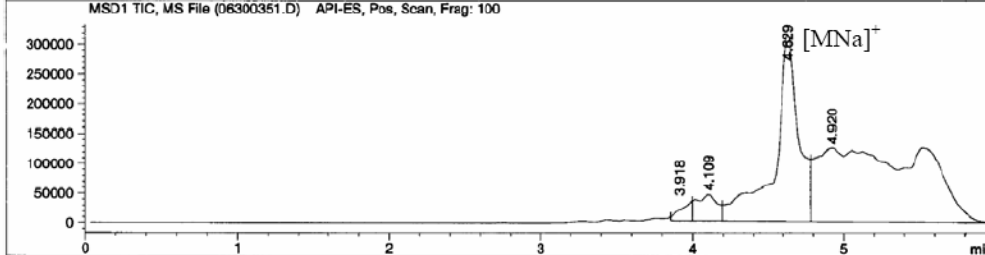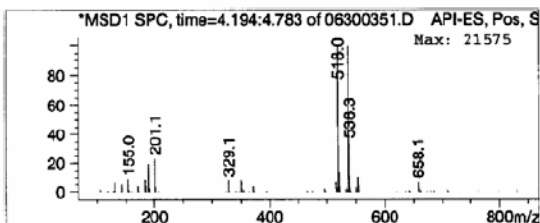

**Benzenesulfonyl-4-benzylsulfanyl-6-(*p*-tolyl)-piperidine-3-carboxylic acid (B01C43E06)**

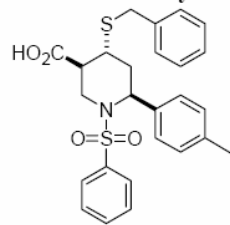

C<sub>26</sub>H<sub>27</sub>NO<sub>4</sub>S<sub>2</sub>  
 Exact Mass: 481.14  
 Mol. Wt.: 481.63

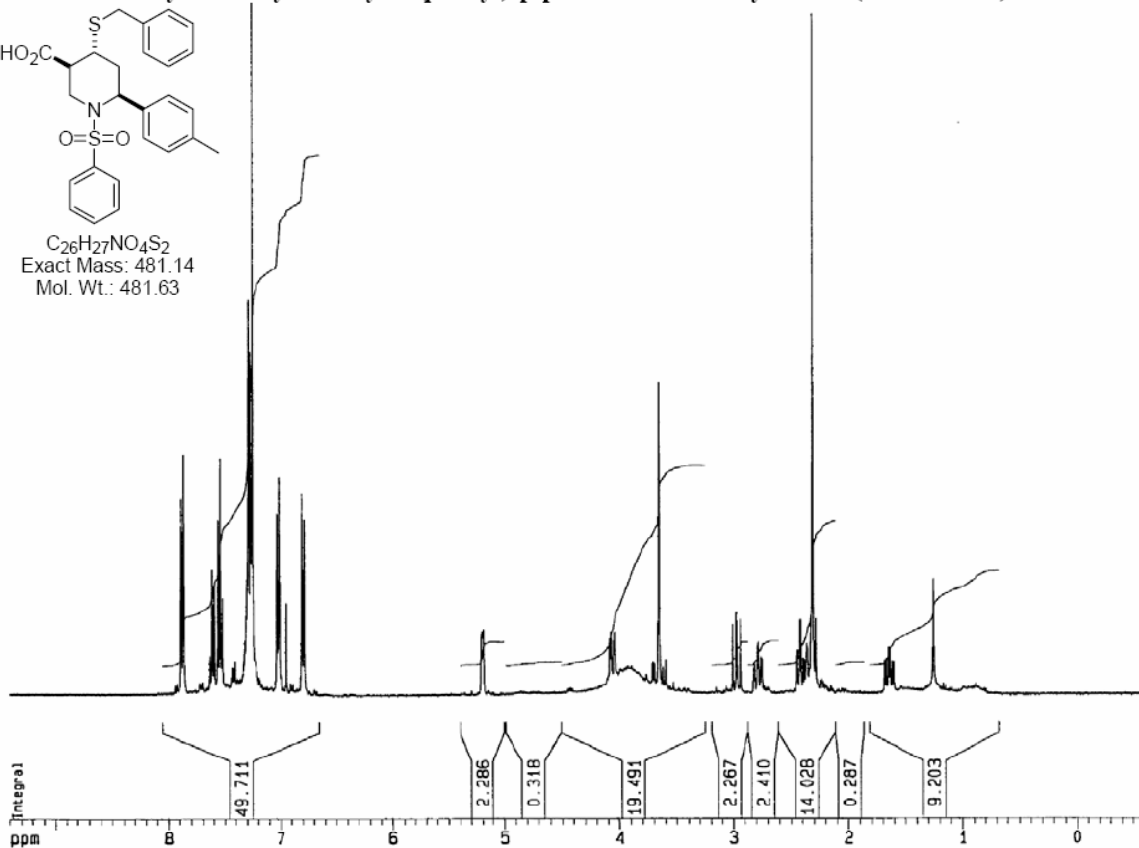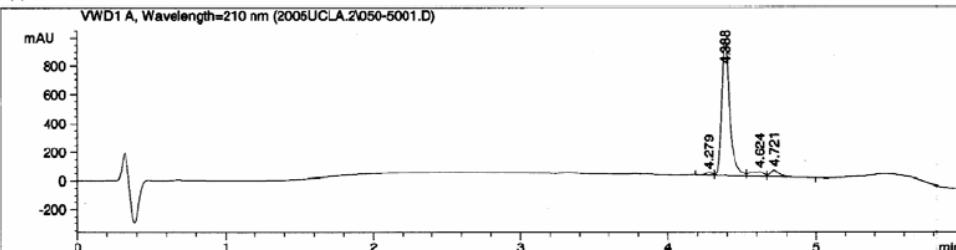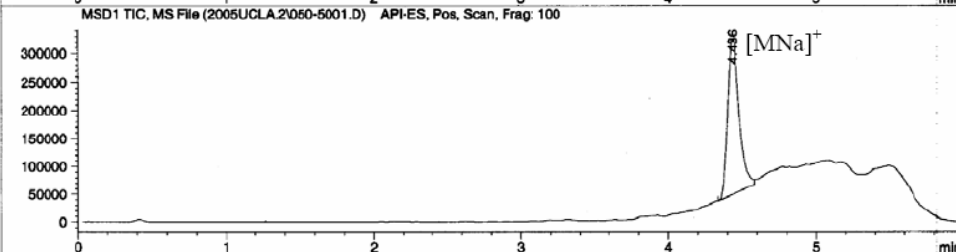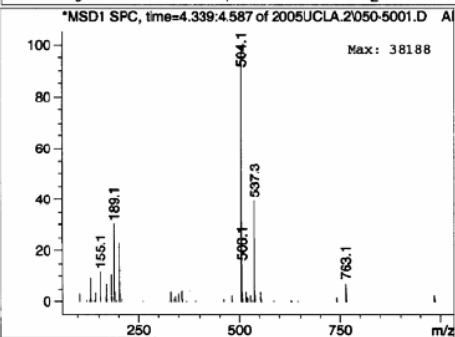

4-Benzylsulfanyl-1-methanesulfonyl-6-(*p*-tolyl)-piperidine-3-carboxylic acid (B01C46E06)

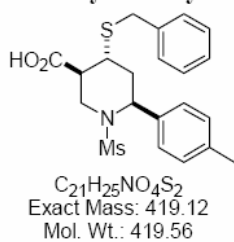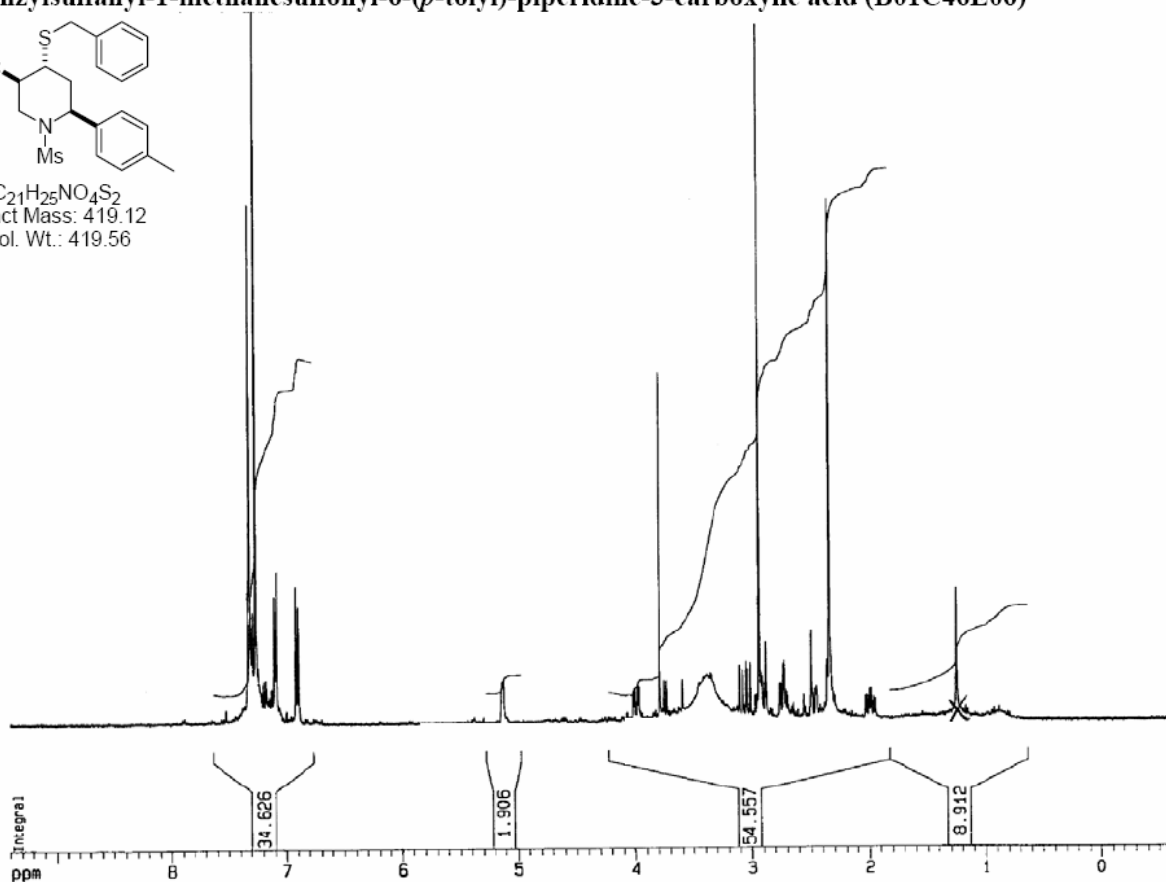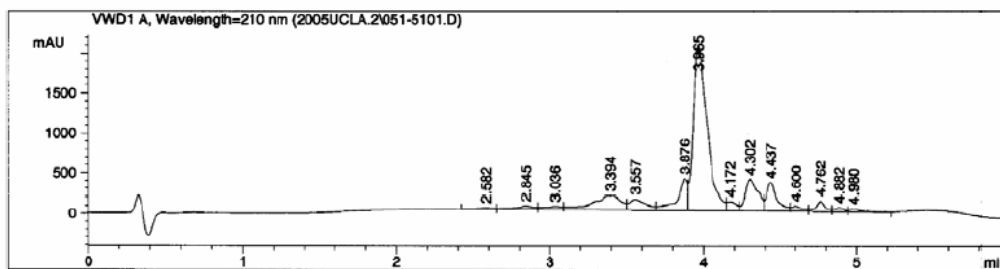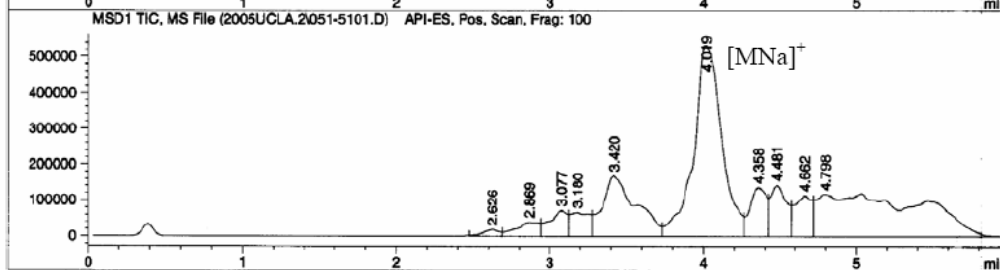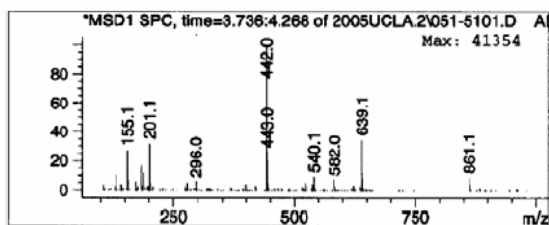

# Spectral data for Table 13

## 4-Phenylsulfanyl-1-(4-toluenesulfonyl)-6-(*p*-tolyl)-piperidine-3-carboxylic acid (B01C02E01)

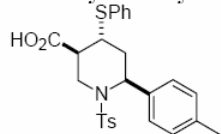

C<sub>26</sub>H<sub>27</sub>NO<sub>4</sub>S<sub>2</sub>  
 Exact Mass: 481.14  
 Mol. Wt.: 481.63

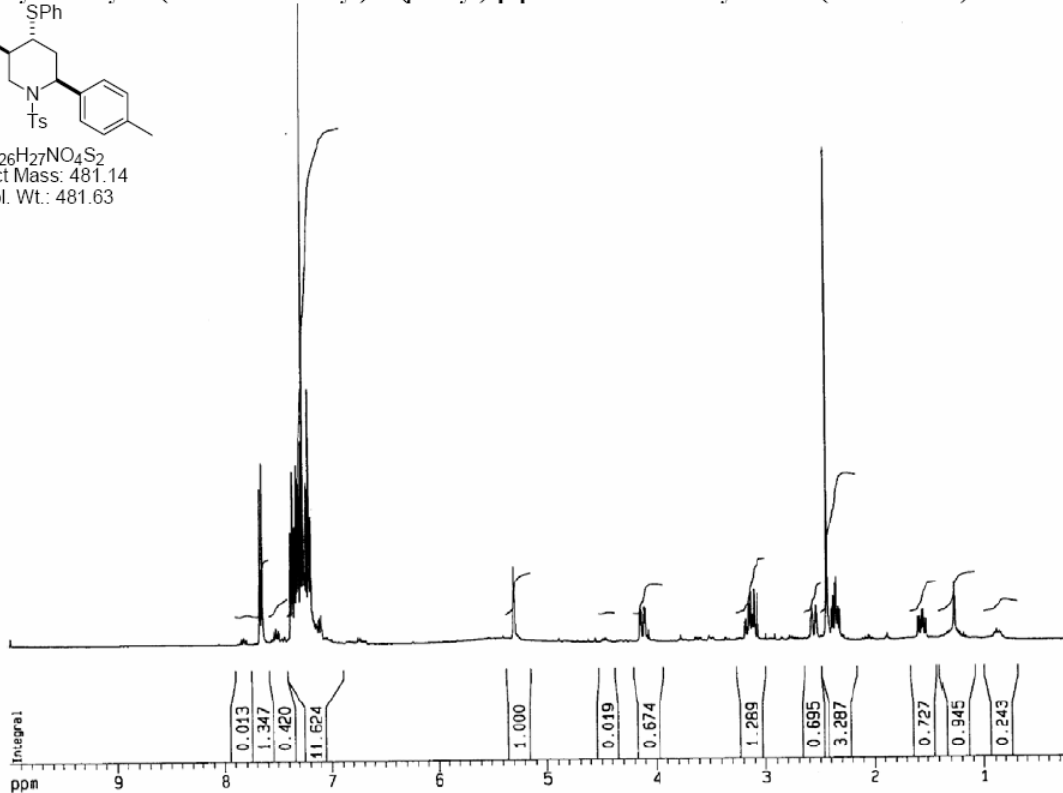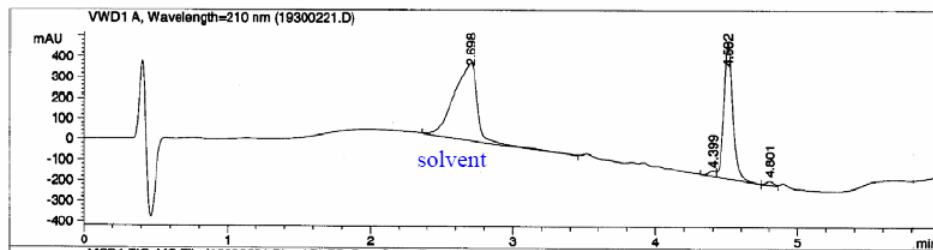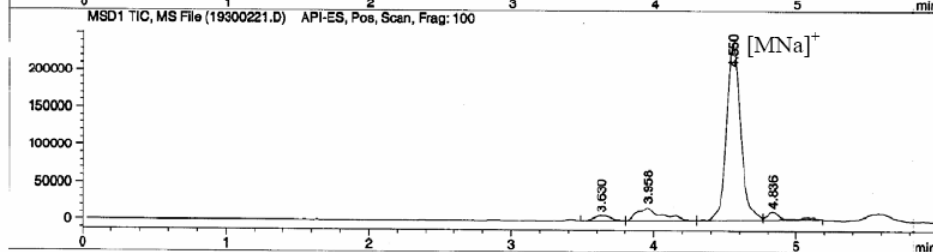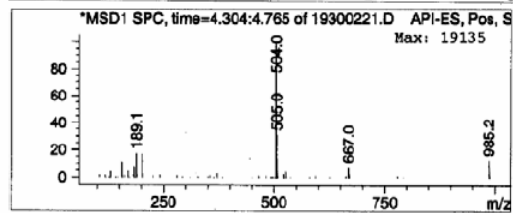

6-Phenyl-1-(4-toluenesulfonyl)-4-(p-tolyl)-sulfanyl piperidine-3-carboxylic acid (B01C01E02)

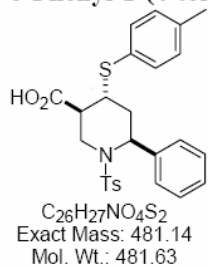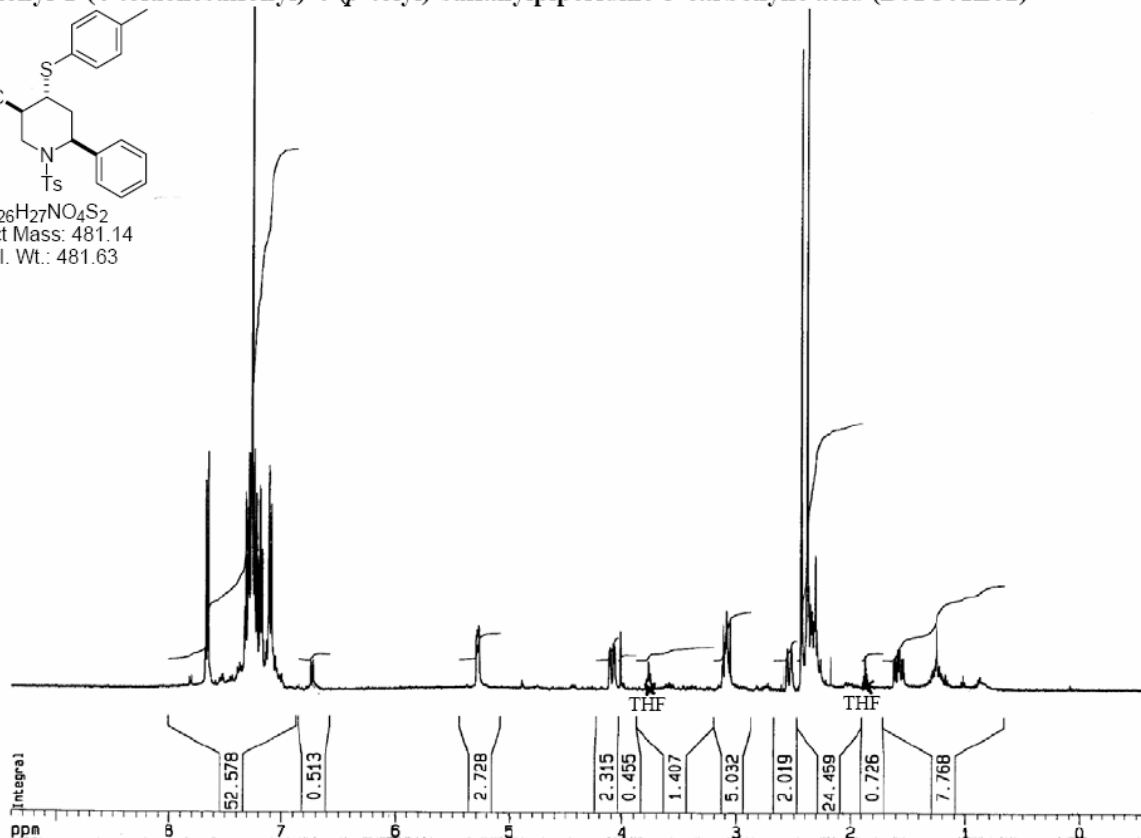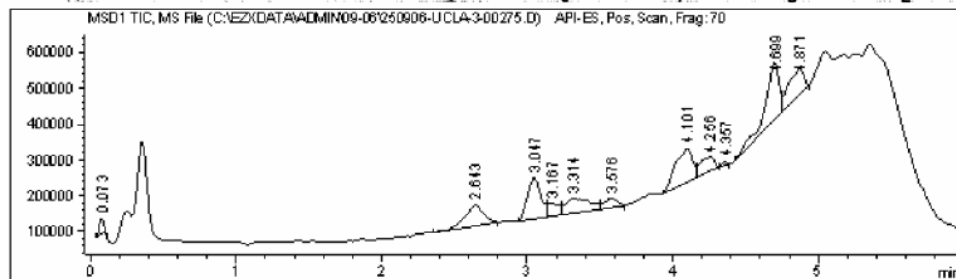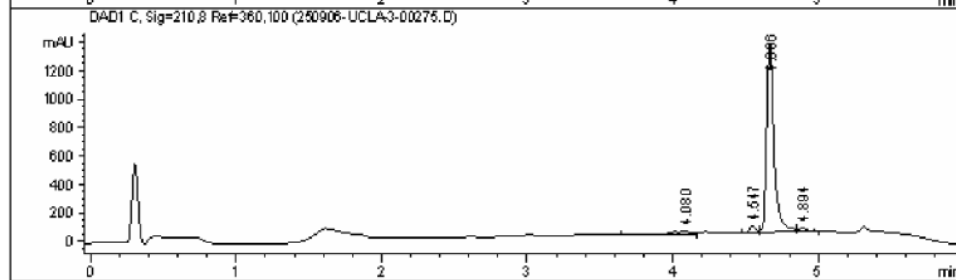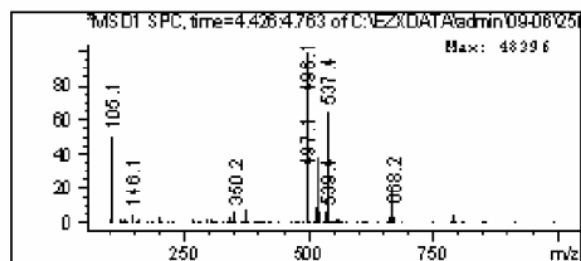

4-(3,4-Dimethylphenylsulfanyl)-6-phenyl-1-(4-toluenesulfonyl)-piperidine-3-carboxylic acid (B01C01E03)  
Not included

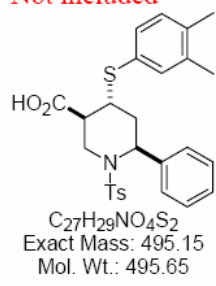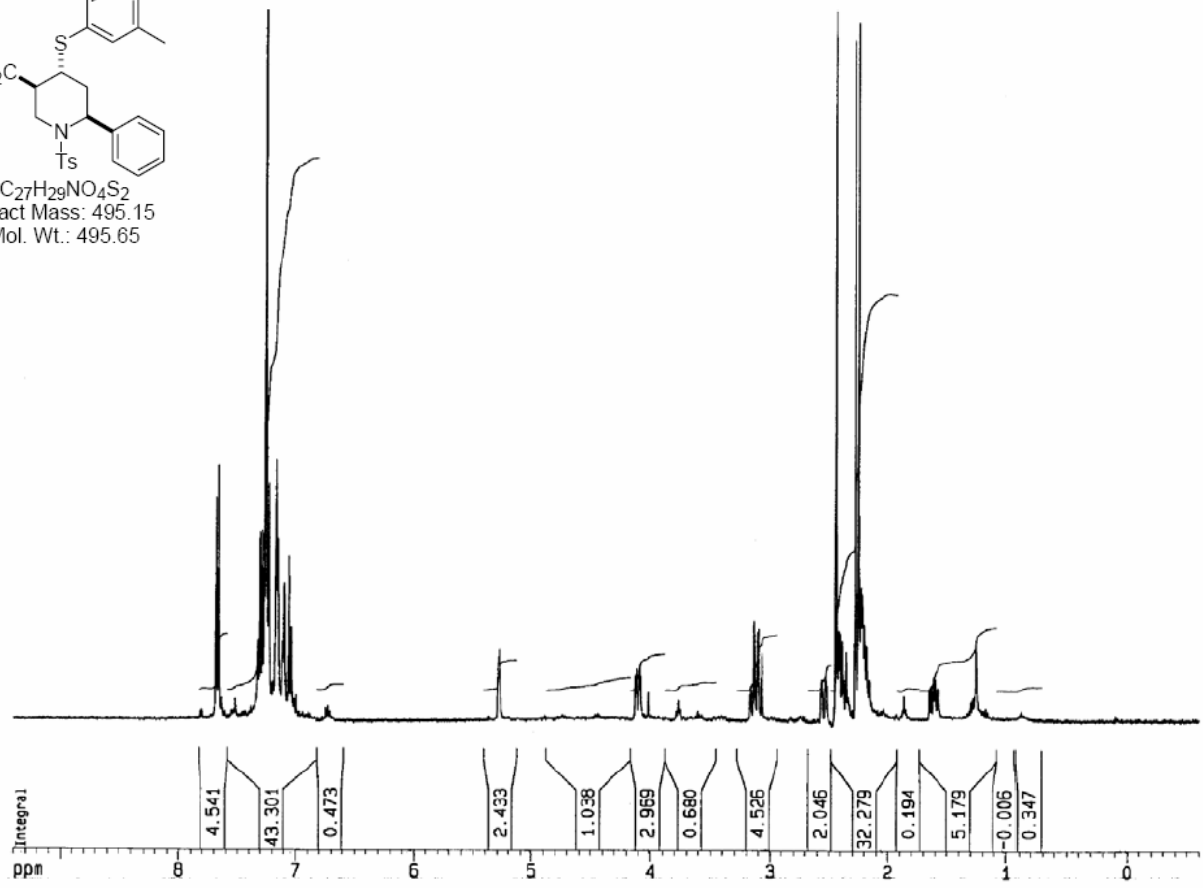



4-(4-Methoxyphenylsulfanyl)-1-(4-toluenesulfonyl)-6-(*p*-tolyl)-piperidine-3-carboxylic acid (B01C02E04)

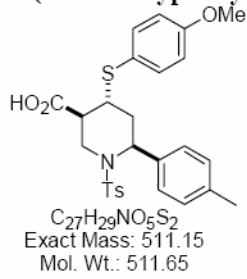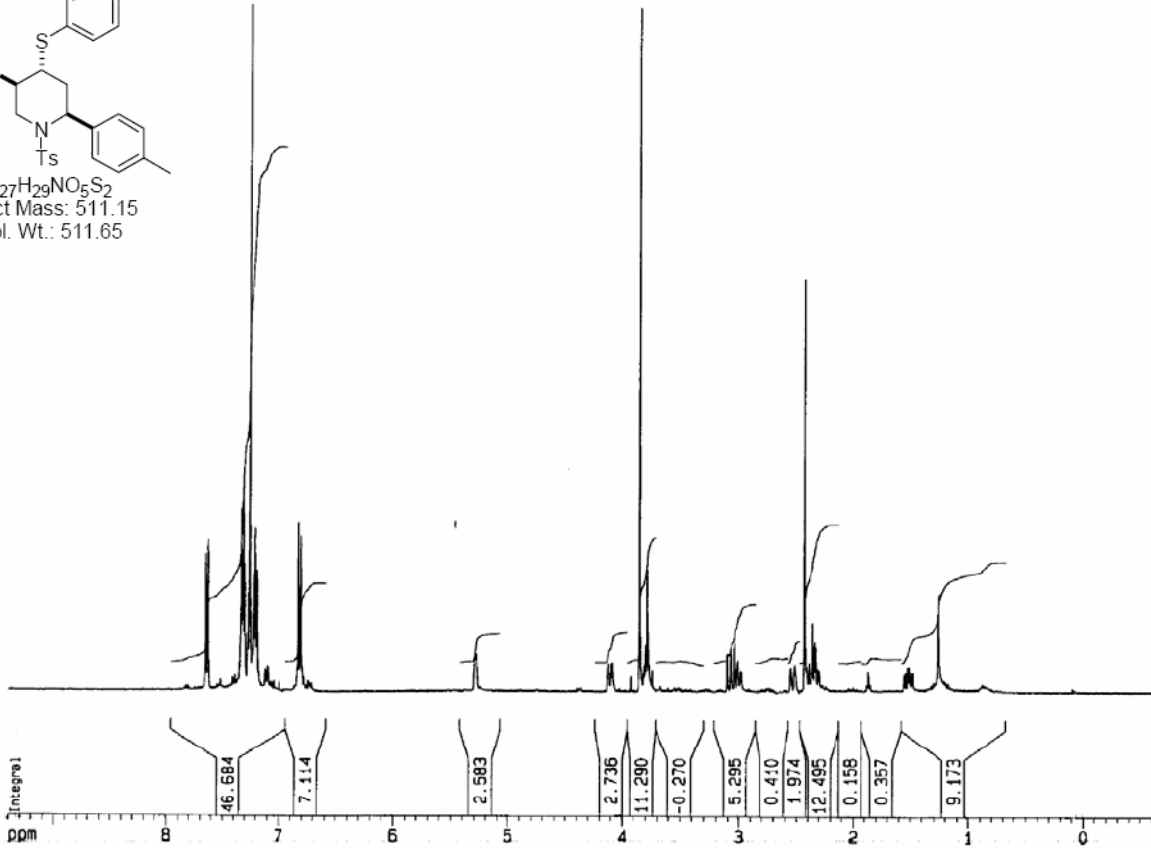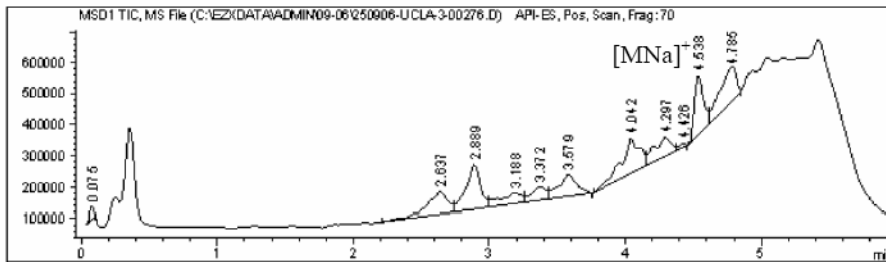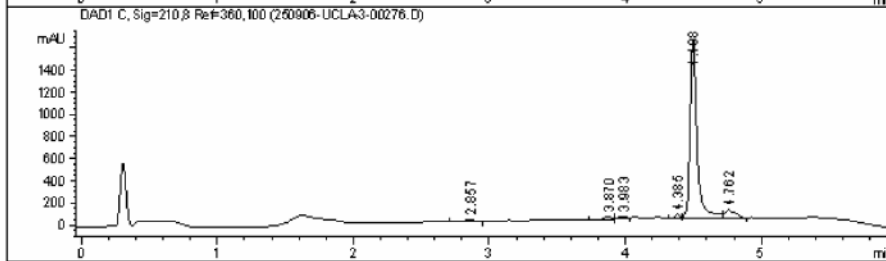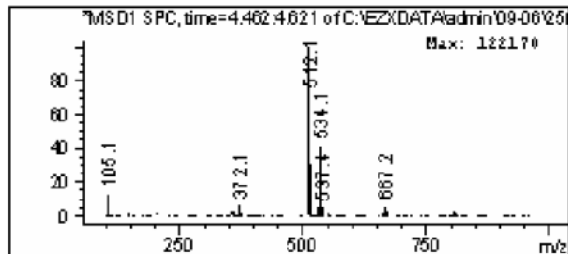

4-(4-Chlorophenylsulfanyl)-1-(4-toluenesulfonyl)-6-(*p*-tolyl)-piperidine-3-carboxylic acid (B01C02E05)

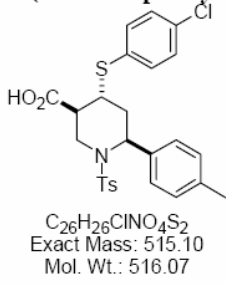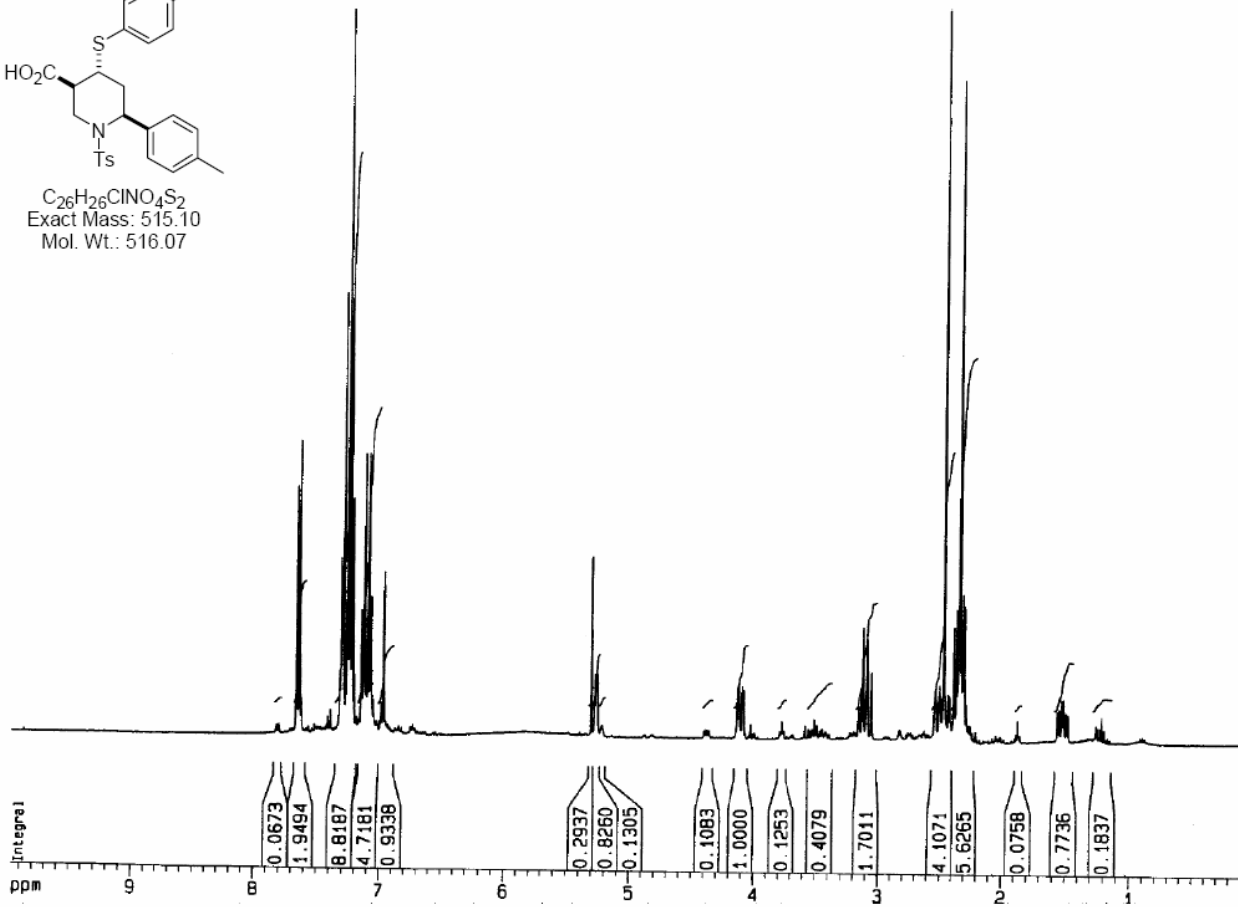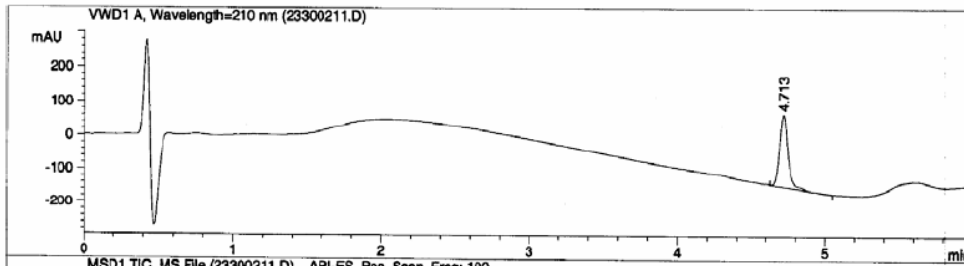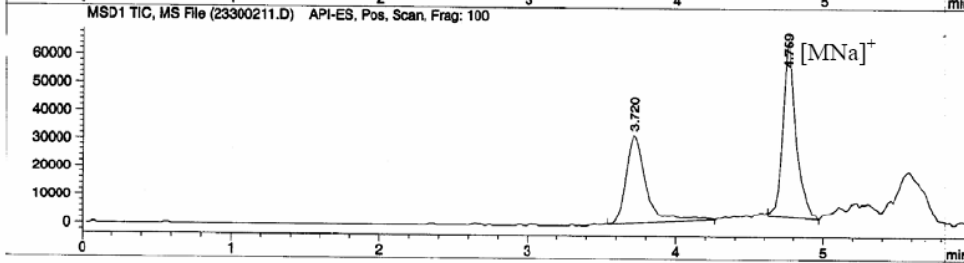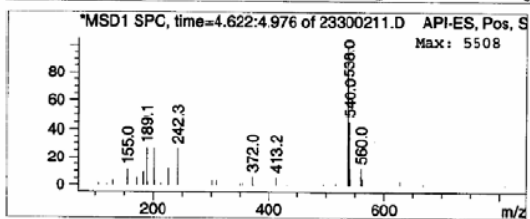

4-Benzylsulfanyl-1-(4-toluenesulfonyl)-6-(*p*-tolyl)-piperidine-3-carboxylic acid (B01C02E06)

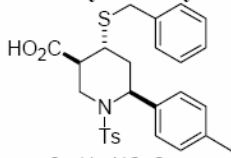

C<sub>27</sub>H<sub>29</sub>NO<sub>4</sub>S<sub>2</sub>  
 Exact Mass: 495.15  
 Mol. Wt.: 495.65

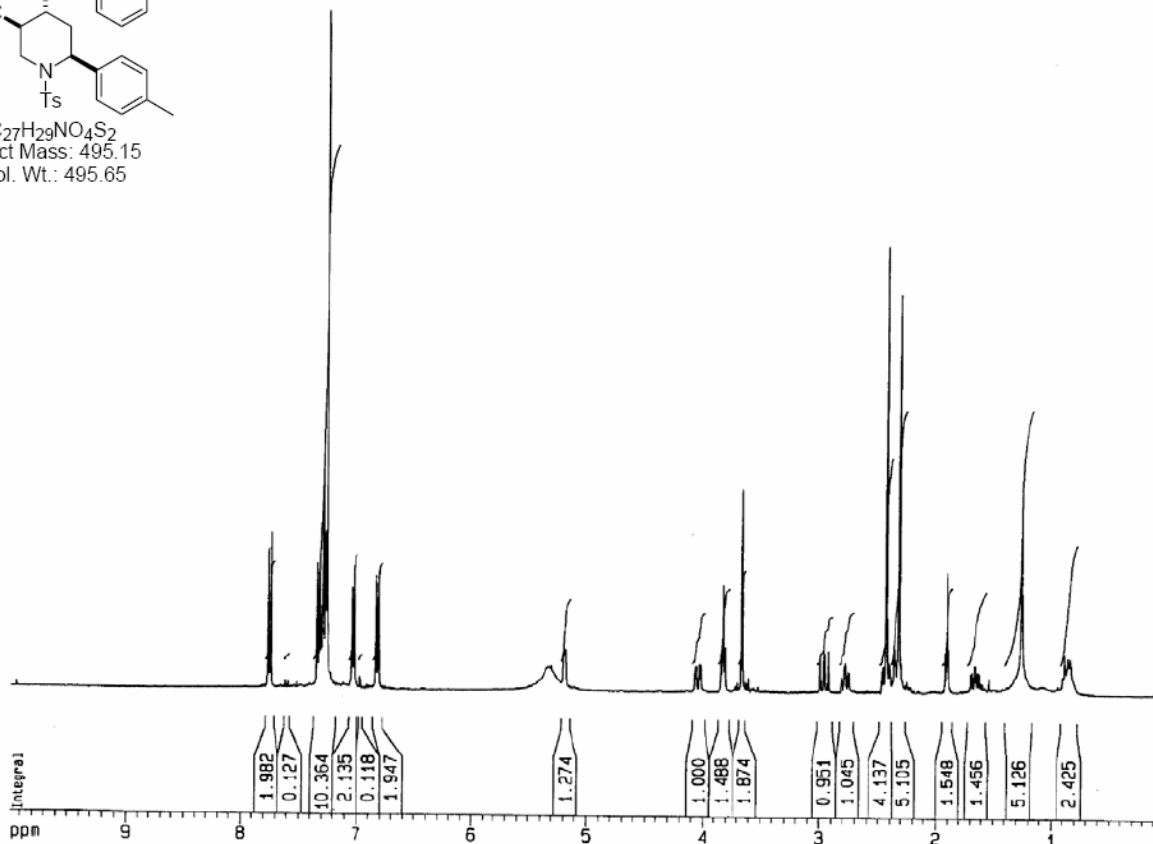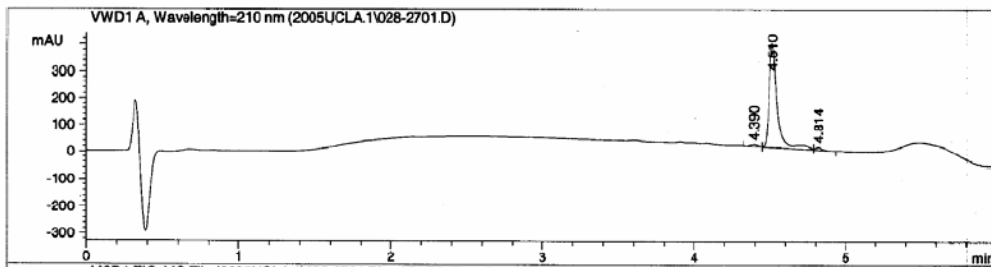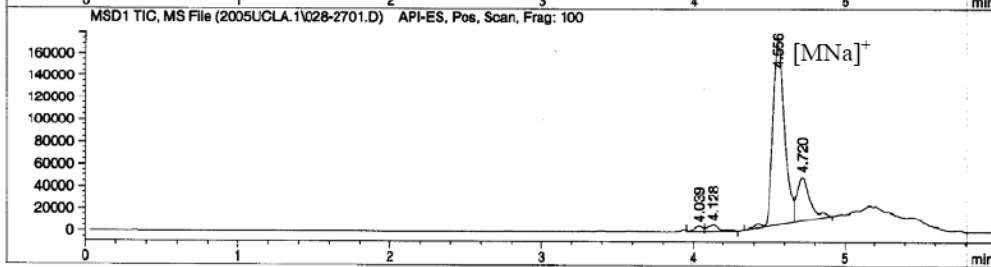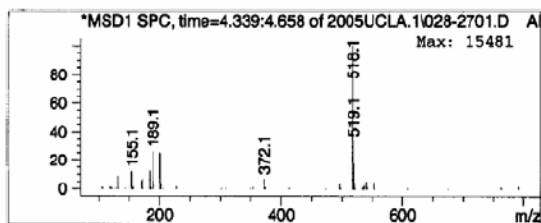

4-(4-*tert*-Butylbenzylsulfanyl)-1-(4-toluenesulfonyl)-6-(*p*-tolyl)-piperidine-3-carboxylic acid (B01C02E07)

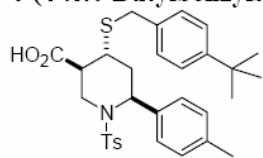

C<sub>31</sub>H<sub>37</sub>NO<sub>4</sub>S<sub>2</sub>  
 Exact Mass: 551.22  
 Mol. Wt.: 551.76

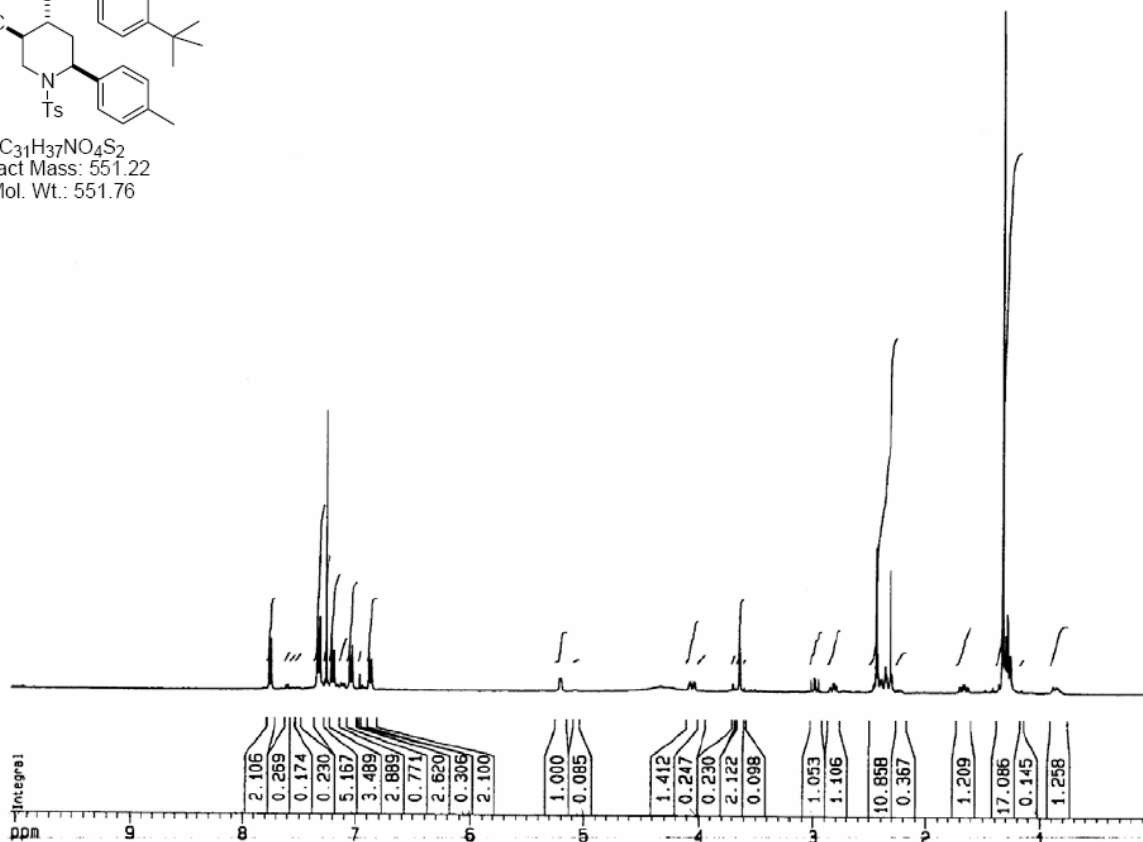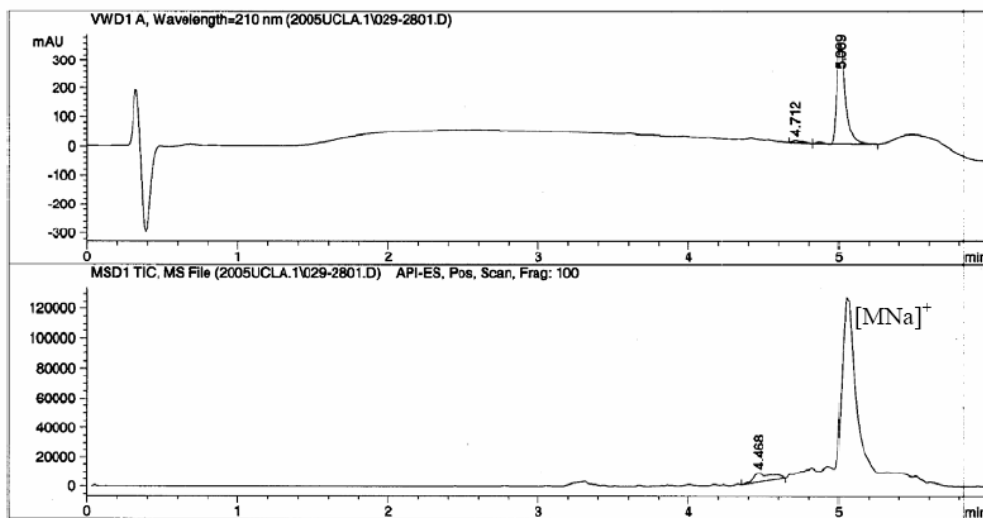

Since the automatic analysis took place up to 5 min retention time, the sample was analyzed independently and we detected (M+Na)<sup>+</sup> at m/z 574.0.

4-(4-Fluorobenzylsulfanyl)-6-phenyl-1-(4-toluenesulfonyl)-piperidine-3-carboxylic acid (B01C01E08)

Not included

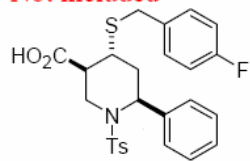

$C_{26}H_{26}FNO_4S_2$   
Exact Mass: 499.13  
Mol. Wt.: 499.62

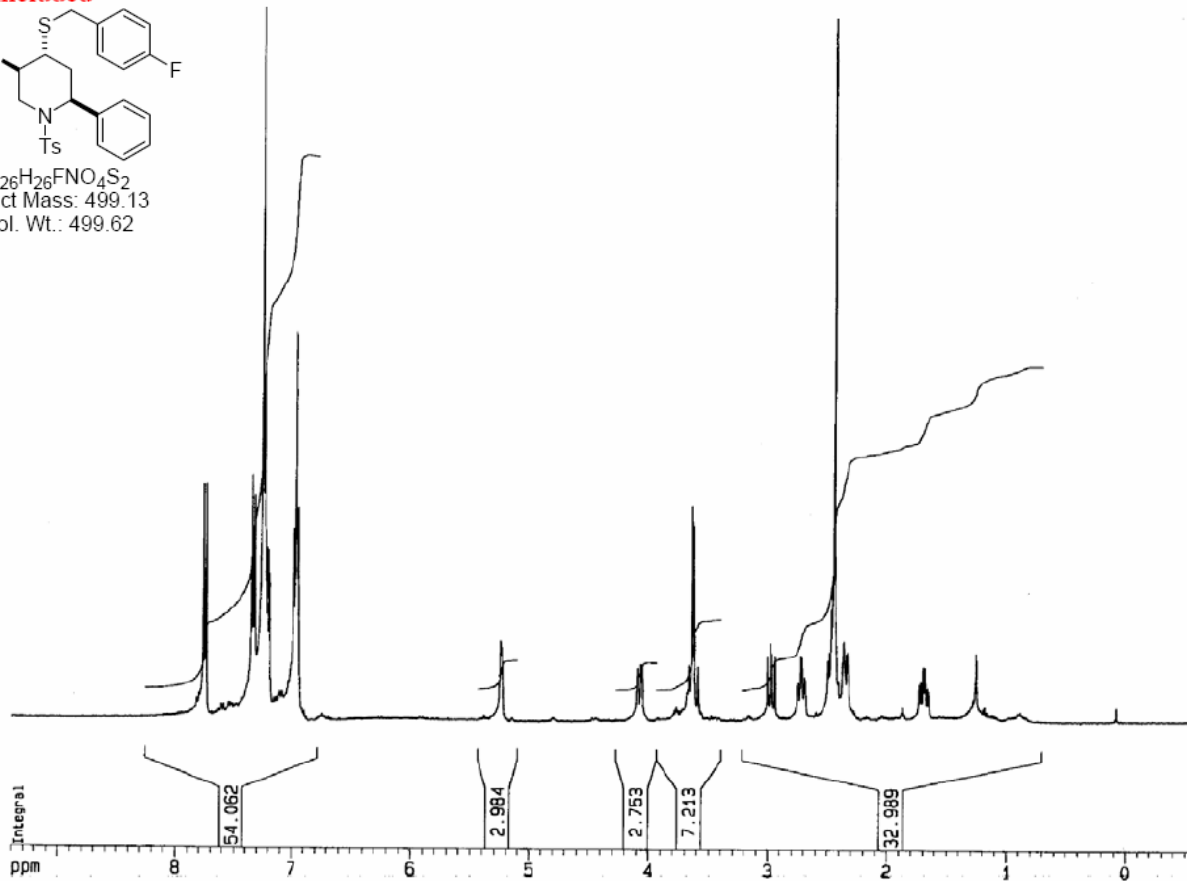

4-(4-Chlorobenzylsulfanyl)-1-(4-toluenesulfonyl)-6-(*p*-tolyl)-piperidine-3-carboxylic acid (B01C02E09)

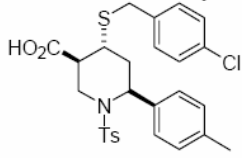

C<sub>27</sub>H<sub>28</sub>ClNO<sub>4</sub>S<sub>2</sub>  
 Exact Mass: 529.11  
 Mol. Wt.: 530.10

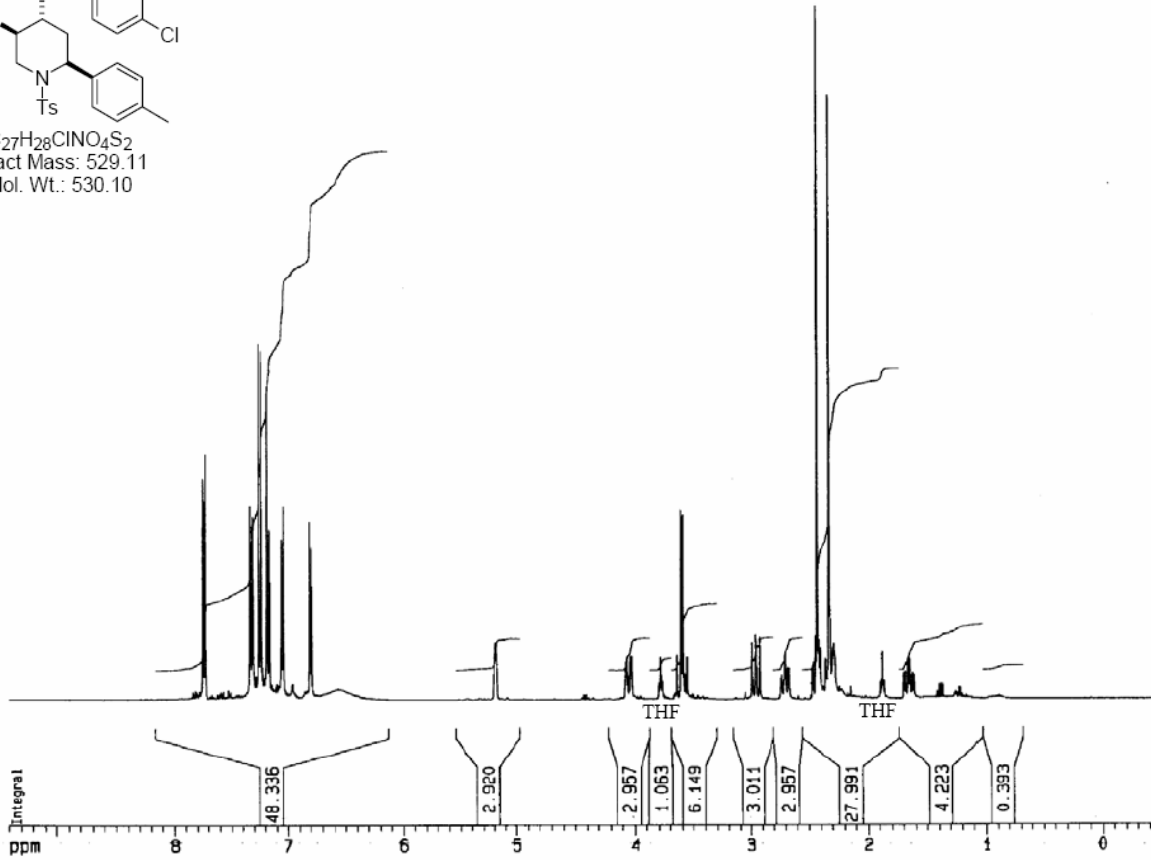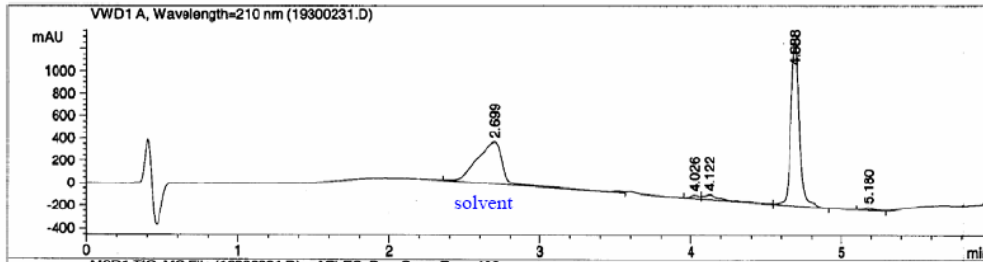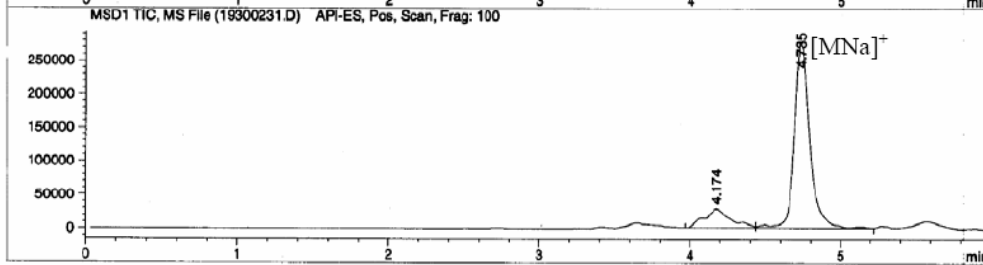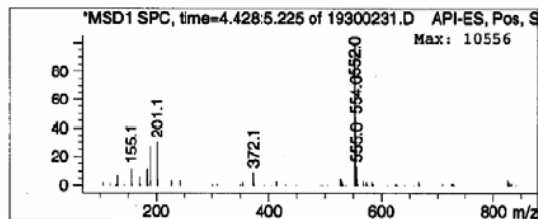

4-(2-Chlorobenzylsulfanyl)-6-phenyl-1-(4-toluenesulfonyl)-piperidine-3-carboxylic acid (B01C01E10)

Not included

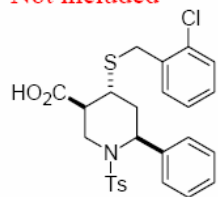

C<sub>26</sub>H<sub>26</sub>ClNO<sub>4</sub>S<sub>2</sub>  
Exact Mass: 515.10  
Mol. Wt.: 516.07

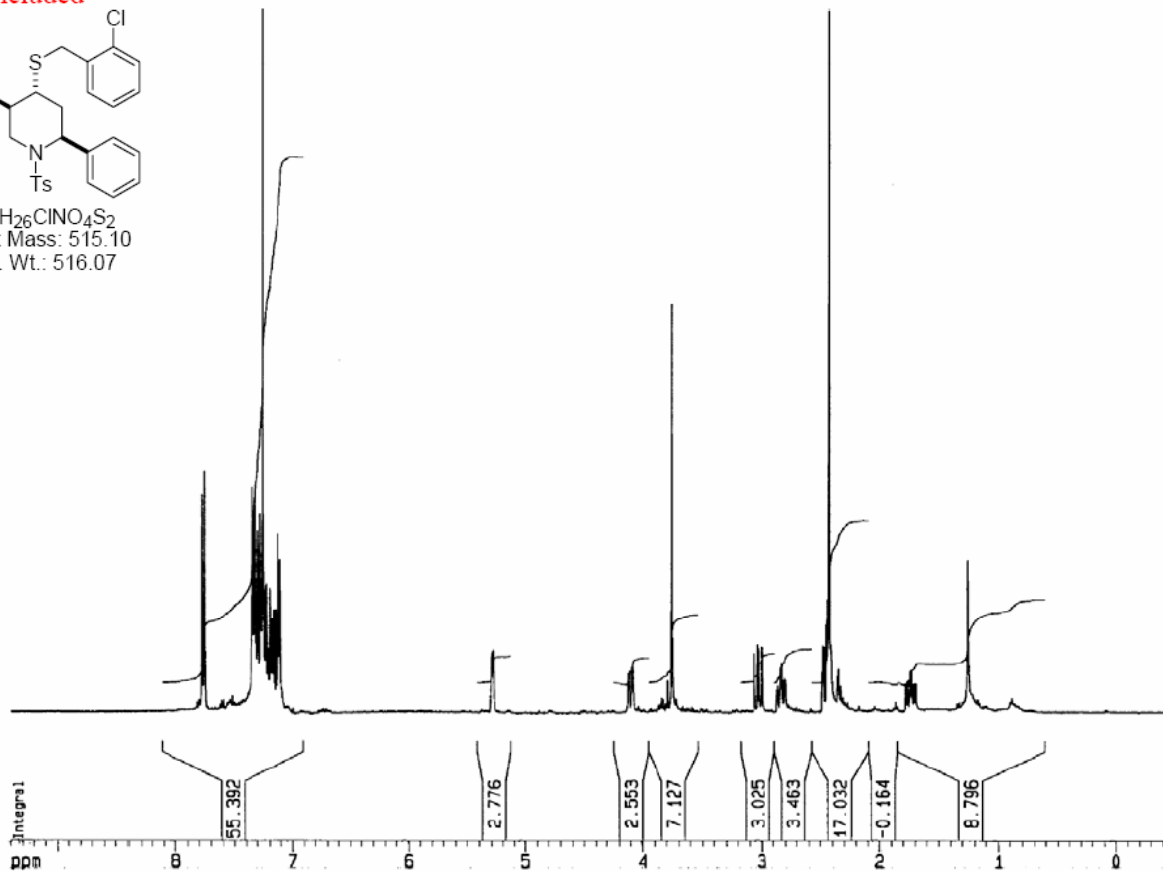

**4-(4-Bromobenzylsulfanyl)-6-phenyl-1-(4-toluenesulfonyl)-piperidine-3-carboxylic acid (B01C01E11)**

Not included

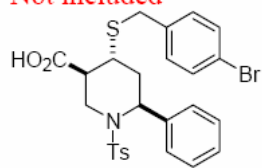

C<sub>26</sub>H<sub>26</sub>BrNO<sub>4</sub>S<sub>2</sub>  
Exact Mass: 559.05  
Mol. Wt.: 560.52

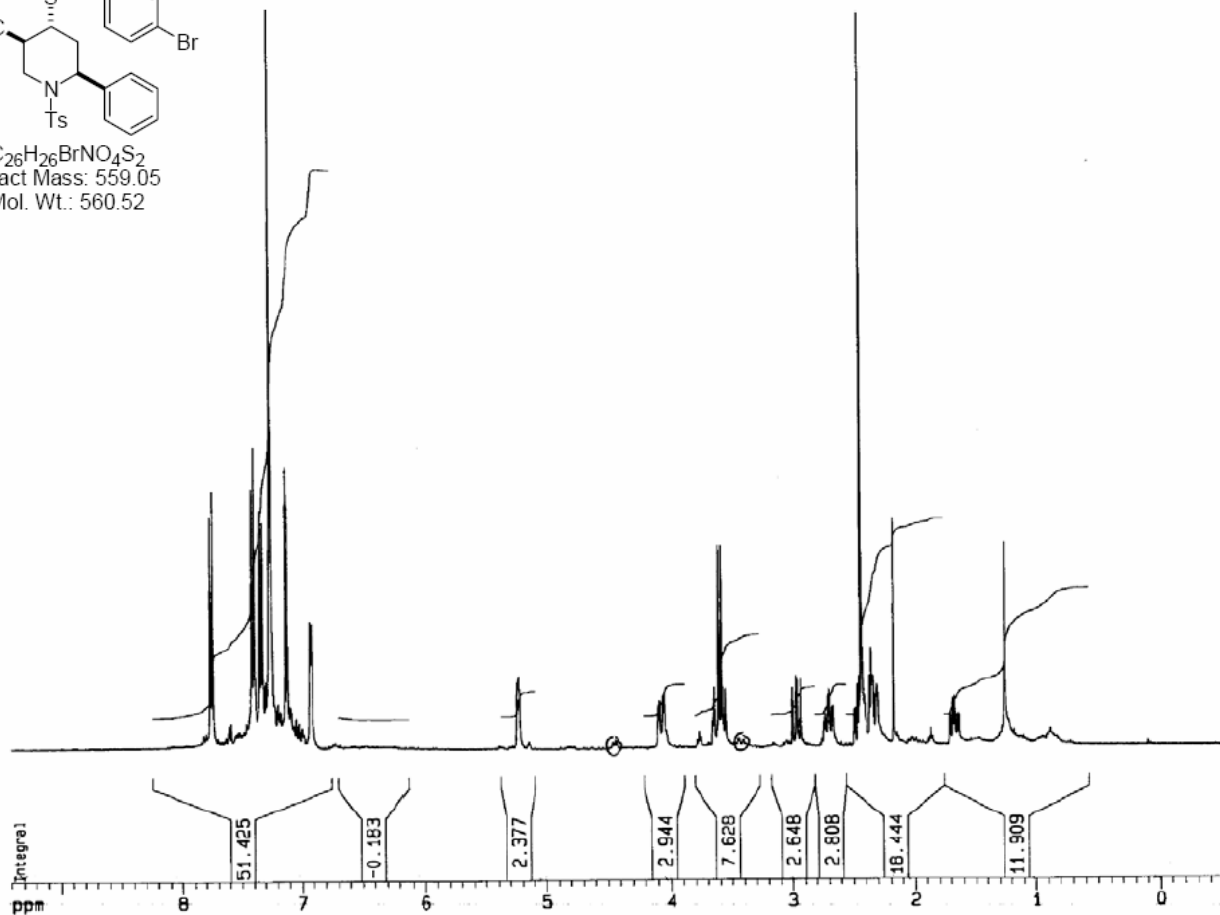



4-(4-Methoxybenzylsulfanyl)-6-phenyl-1-(4-toluenesulfonyl)-piperidine-3-carboxylic acid (B01C01E12)

Not included

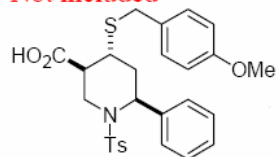

C<sub>27</sub>H<sub>29</sub>NO<sub>5</sub>S<sub>2</sub>  
Exact Mass: 511.15  
Mol. Wt.: 511.65

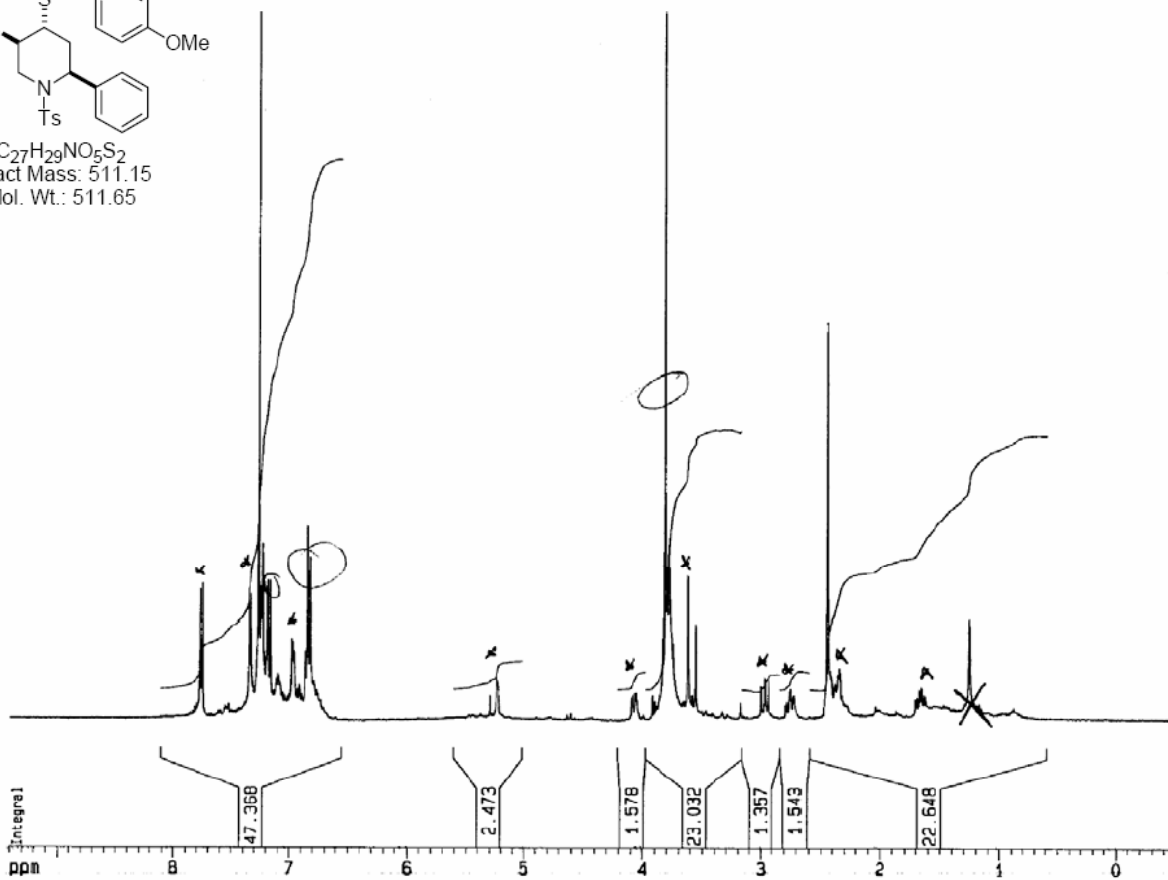

4-(Naphthalen-2-ylsulfanyl)-6-phenyl-1-(4-toluenesulfonyl)-piperidine-3-carboxylic acid (B01C01E13)  
Not included

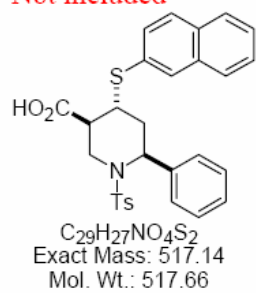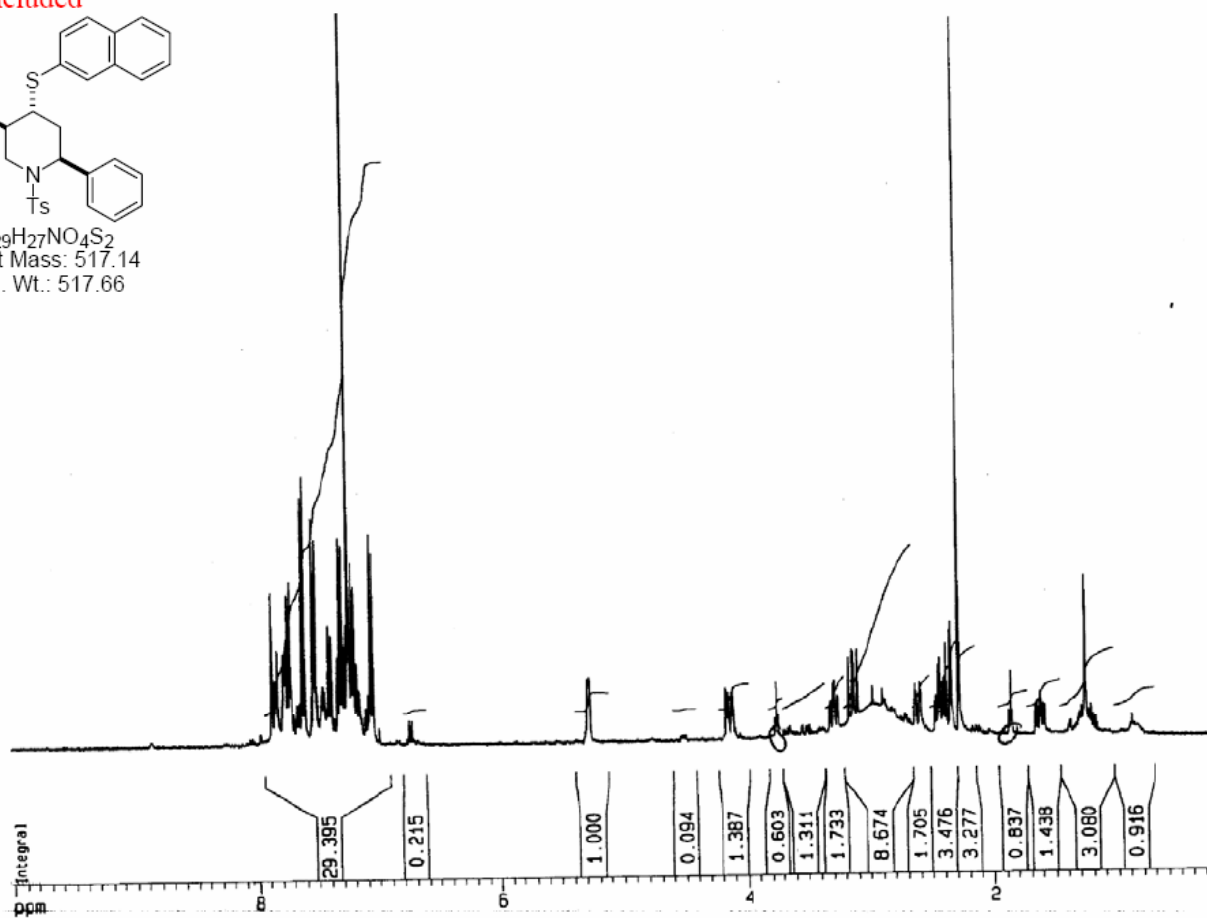

4-(Furan-2-ylmethylsulfanyl)-6-phenyl-1-(4-toluenesulfonyl)-piperidine-3-carboxylic acid (B01C01E14)

Not included

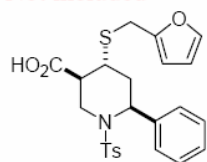

C<sub>24</sub>H<sub>25</sub>NO<sub>5</sub>S<sub>2</sub>  
Exact Mass: 471.12  
Mol. Wt.: 471.59

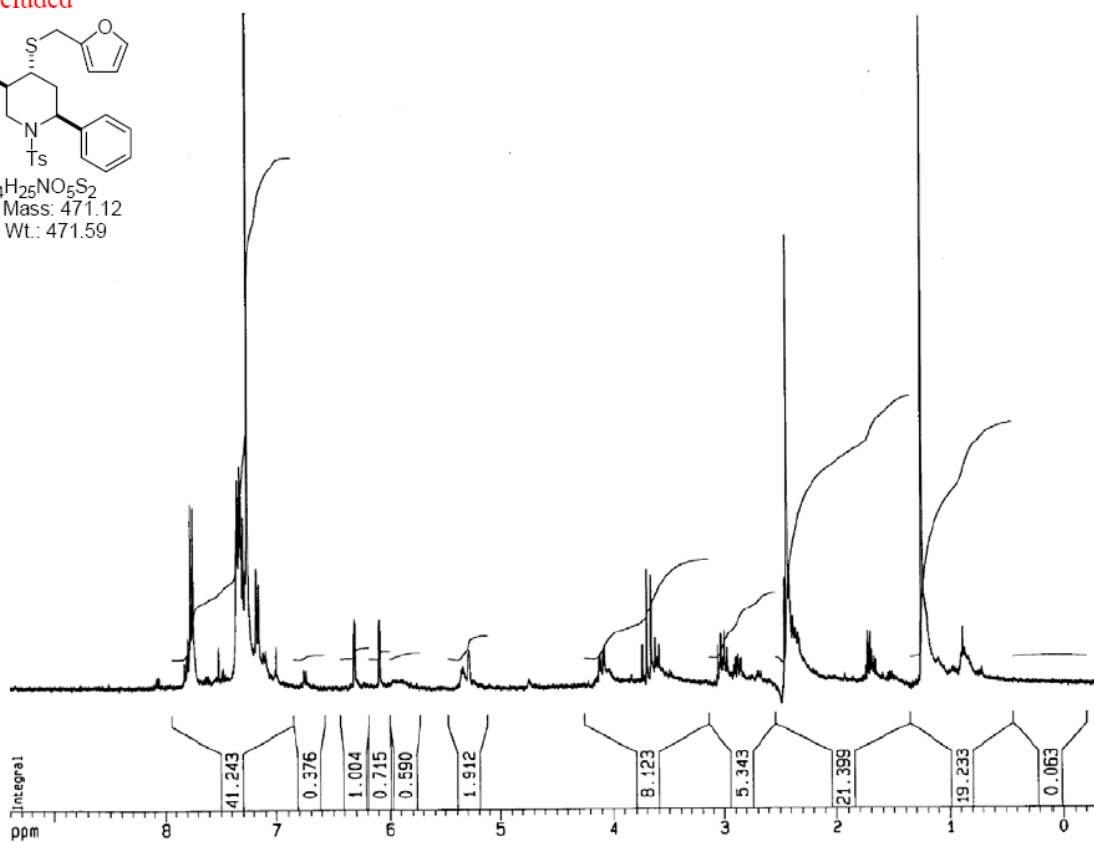

4-Phenethylsulfanyl-1-(4-toluenesulfonyl)-6-(*p*-tolyl)-piperidine-3-carboxylic acid (B01C02E15)

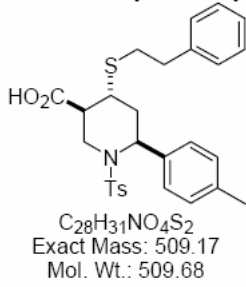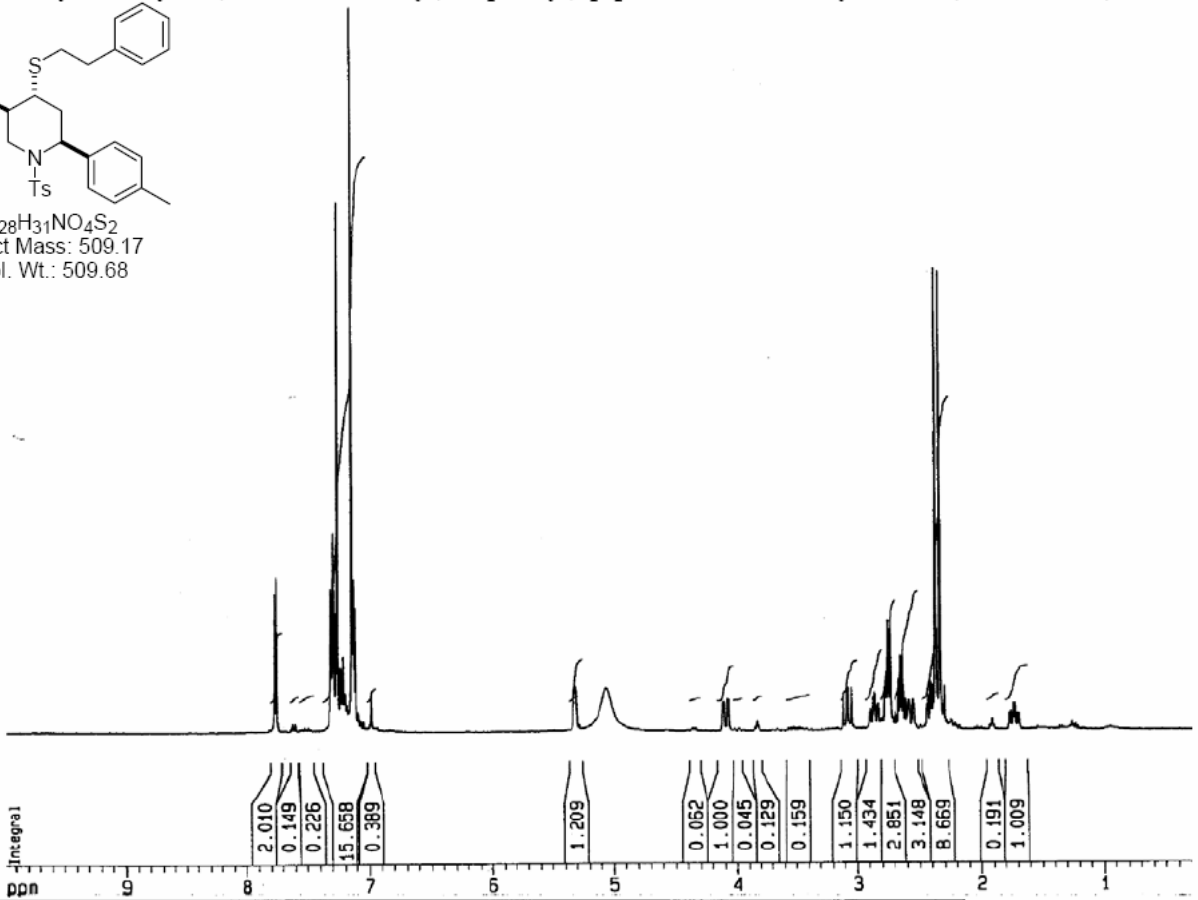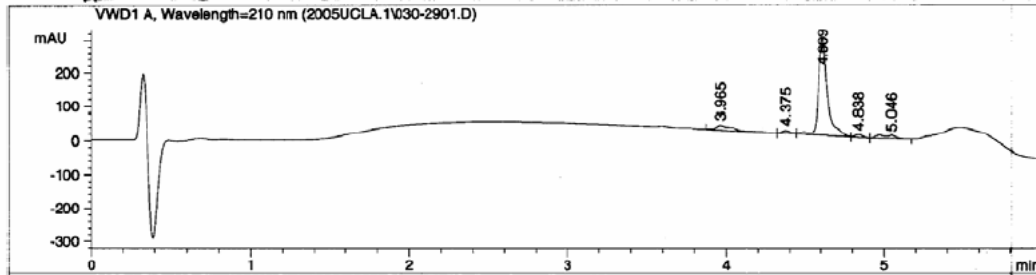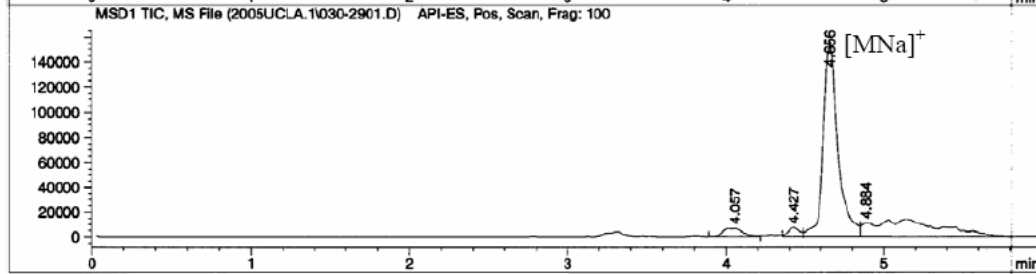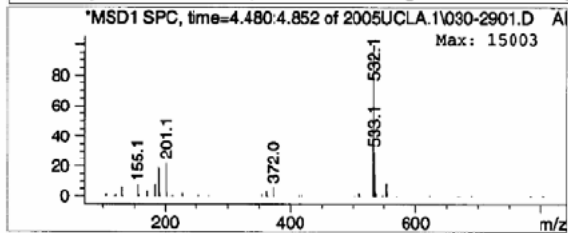

4-Ethylsulfanyl-1-(4-toluenesulfonyl)-6-(*p*-tolyl)-piperidine-3-carboxylic acid (B01C02E16)

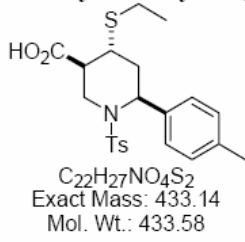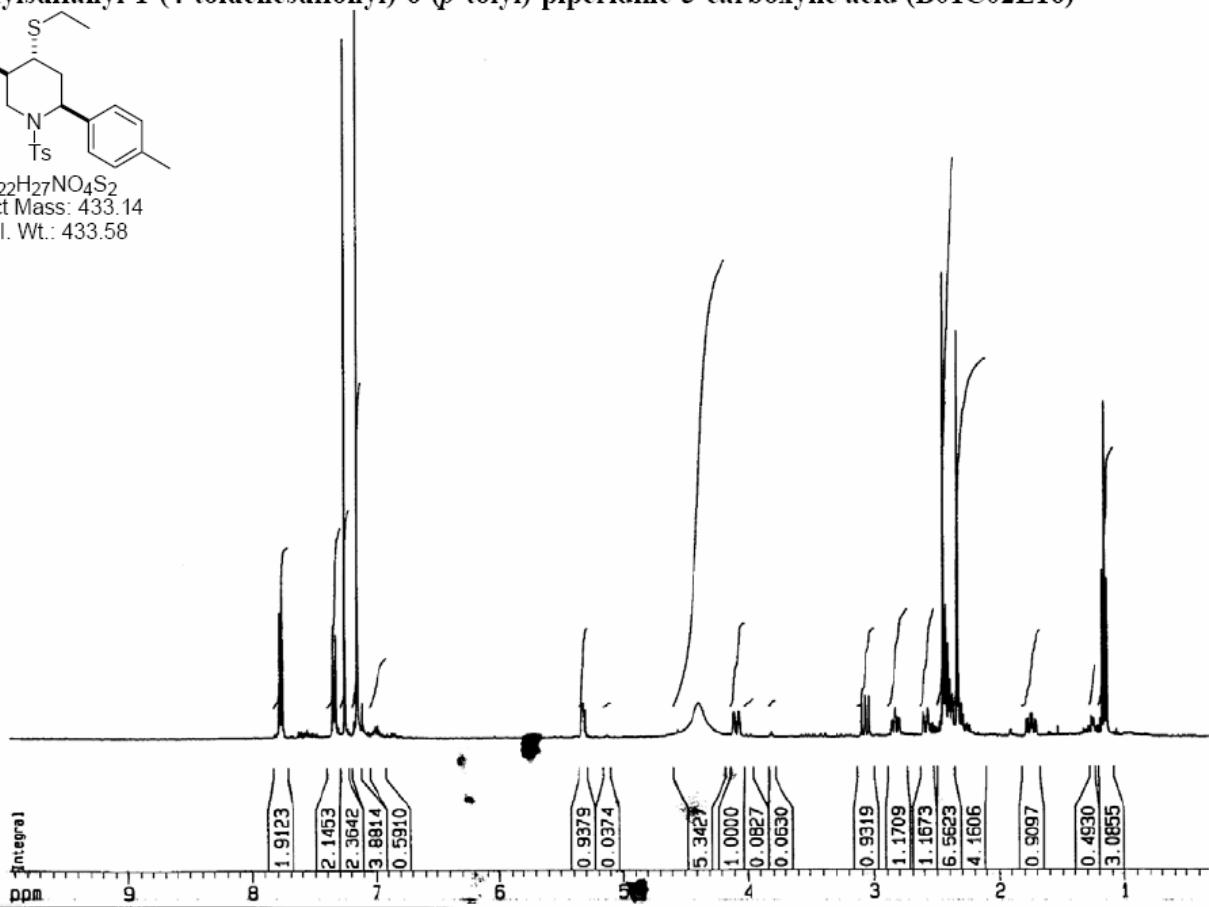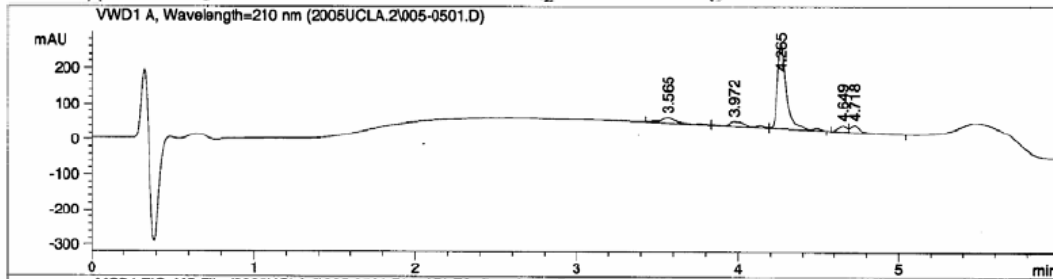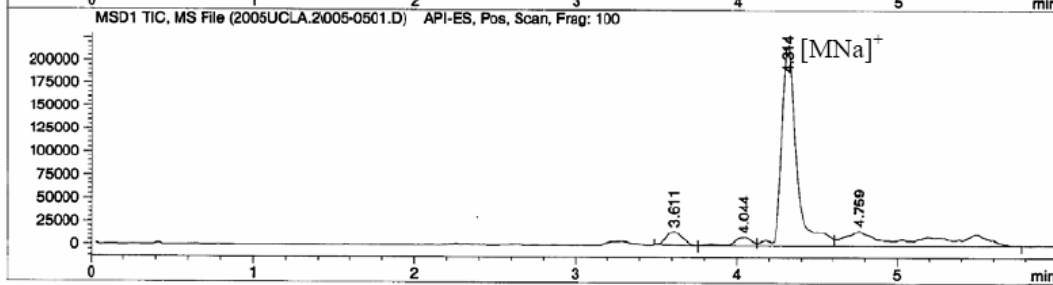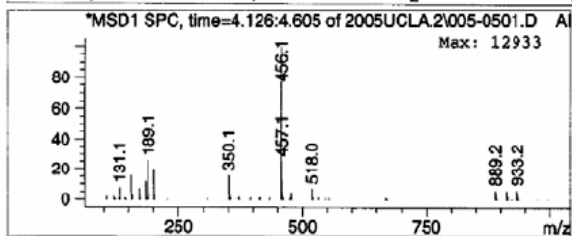

4-Isopropylsulfanyl-6-phenyl-1-(4-toluenesulfonyl)-piperidine-3-carboxylic acid (B01C01E17)

Not included

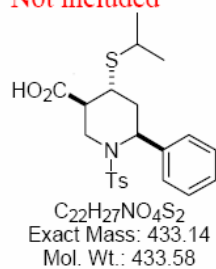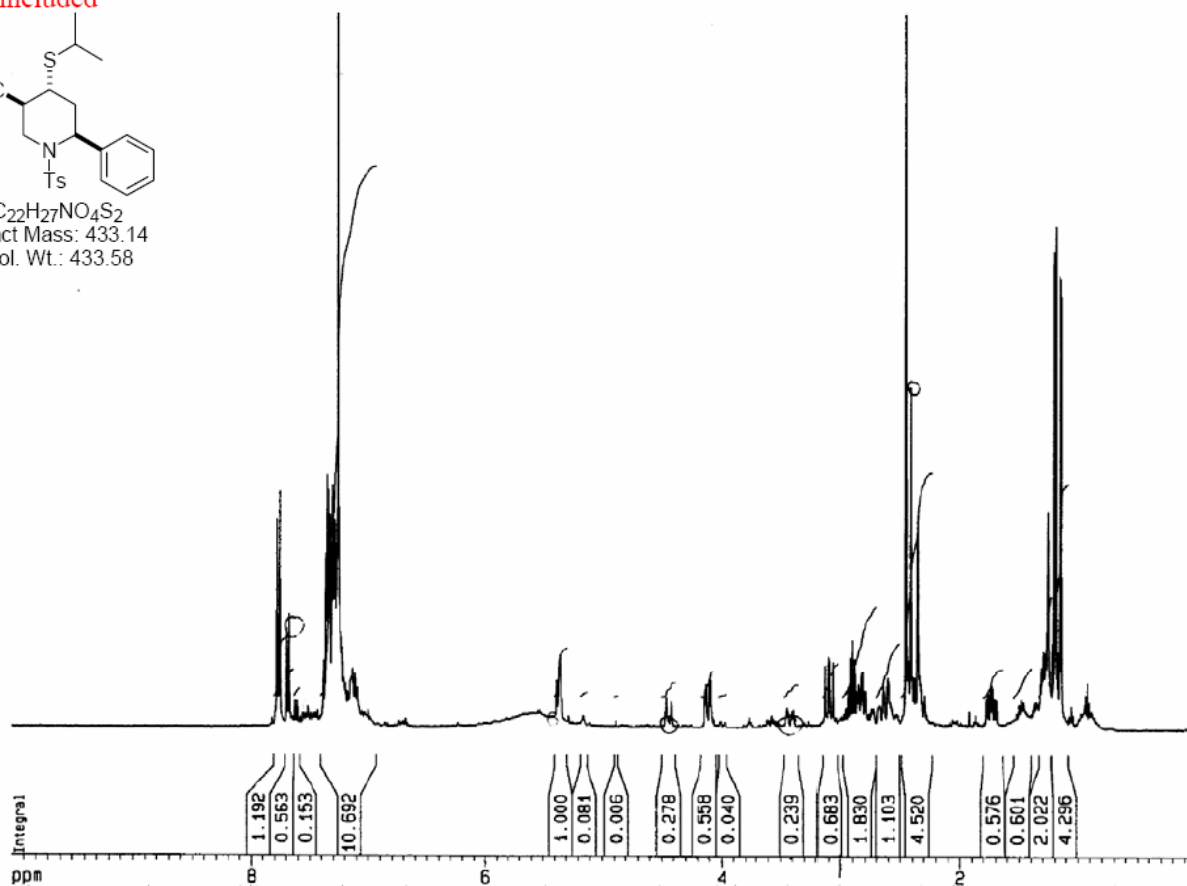

4-Propylsulfanyl-1-(4-toluenesulfonyl)-6-(*p*-tolyl)-piperidine-3-carboxylic acid (B01C02E18)

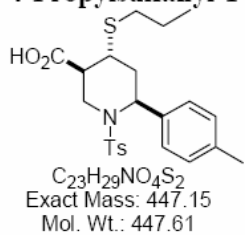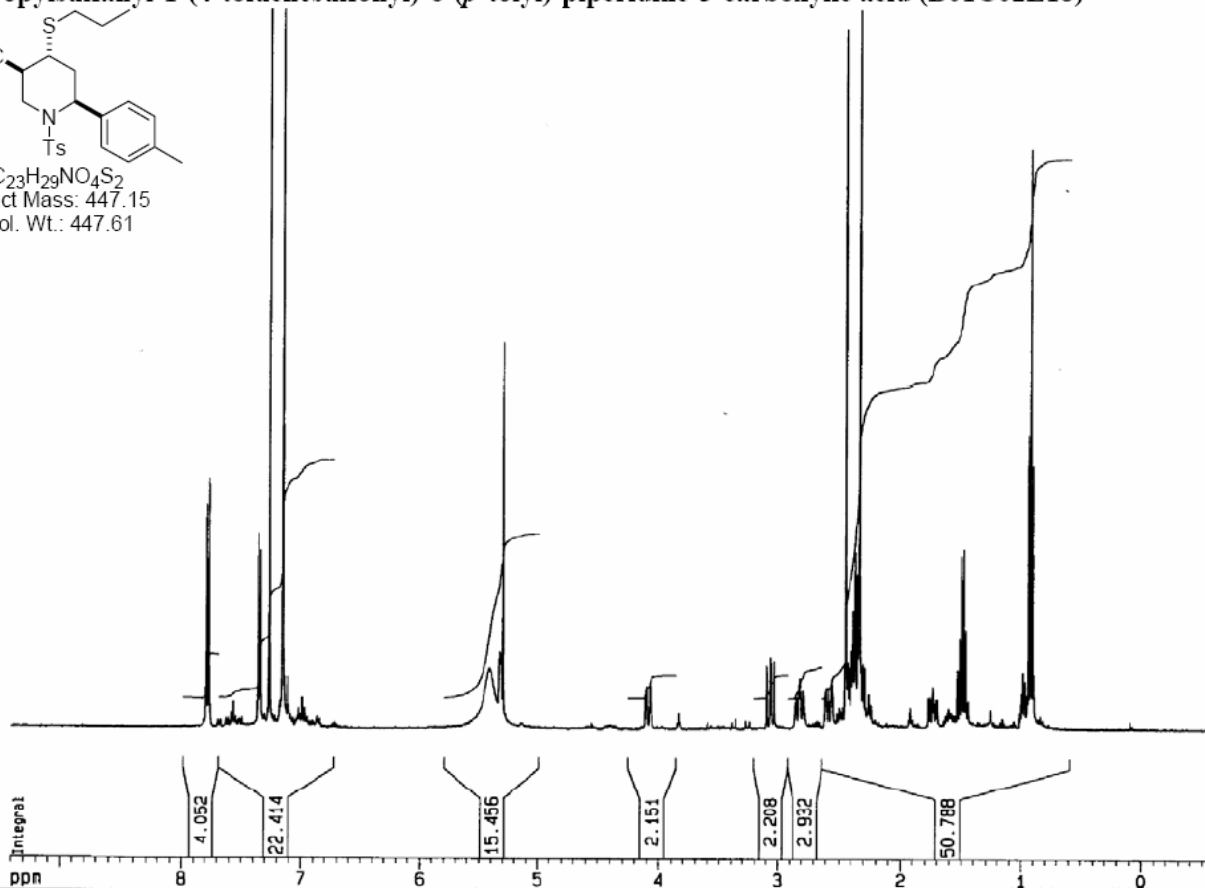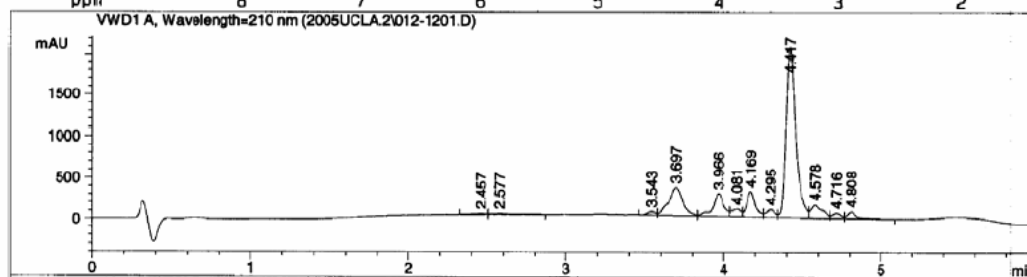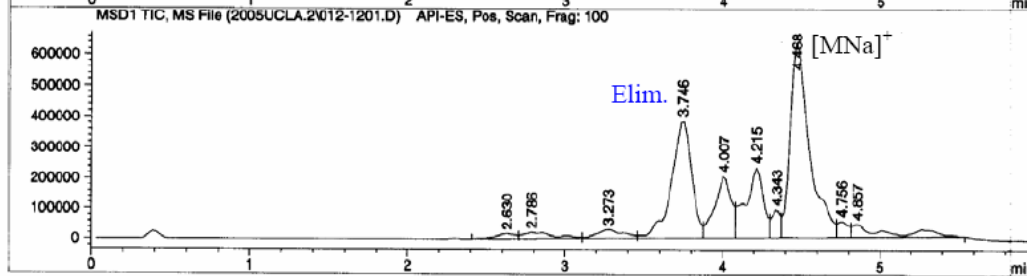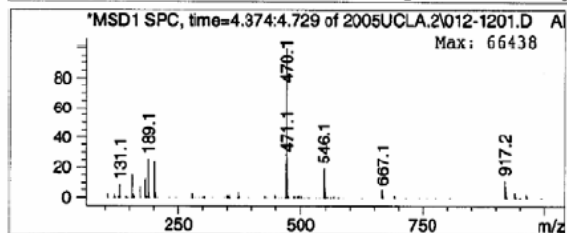

4-sec-Butylsulfanyl-1-(4-toluenesulfonyl)-6-(p-tolyl)-piperidine-3-carboxylic acid (B01C01E20)

Not included

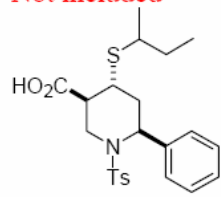

C<sub>23</sub>H<sub>29</sub>NO<sub>4</sub>S<sub>2</sub>  
Exact Mass: 447.15  
Mol. Wt.: 447.61

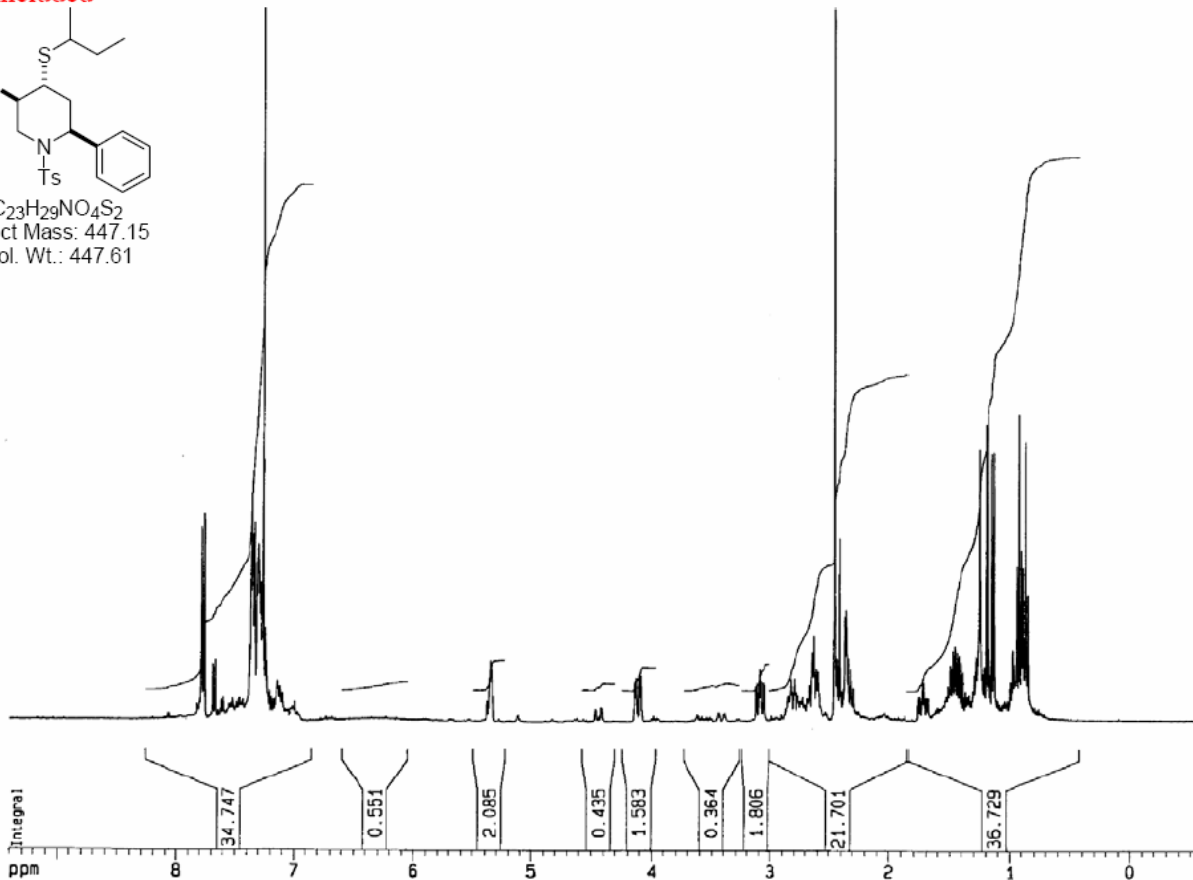



4-Isobutylsulfanyl-1-(4-toluenesulfonyl)-6-(*p*-tolyl)-piperidine-3-carboxylic acid (B01C02E21)

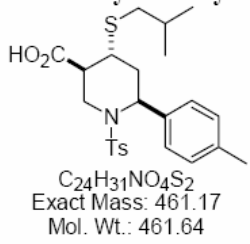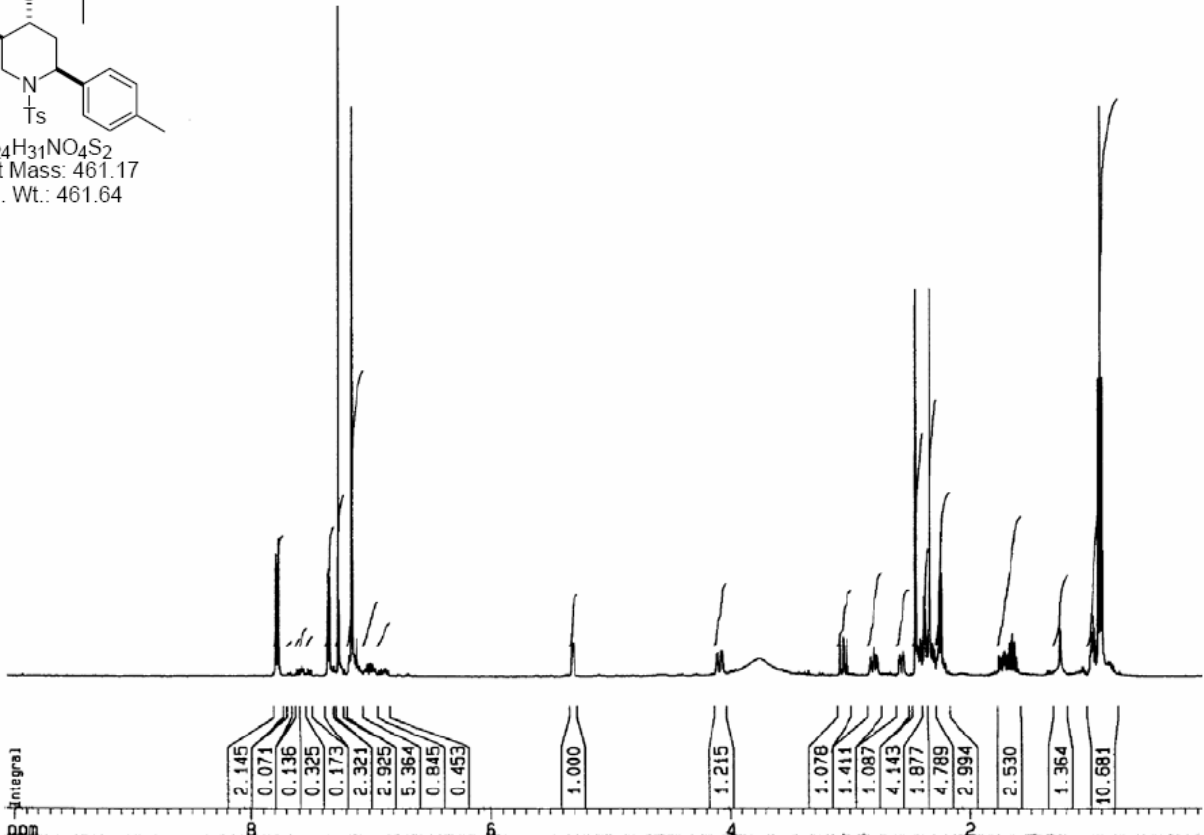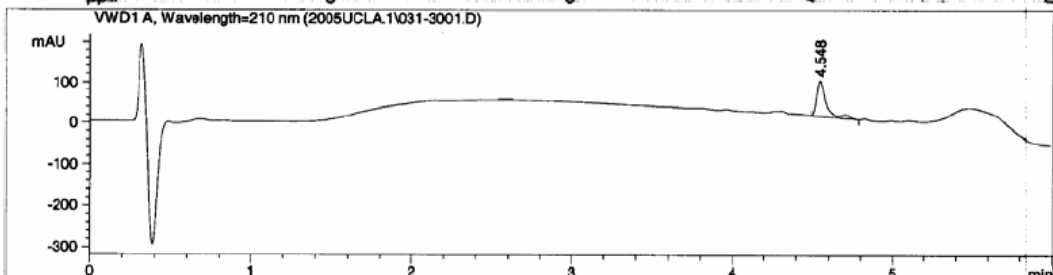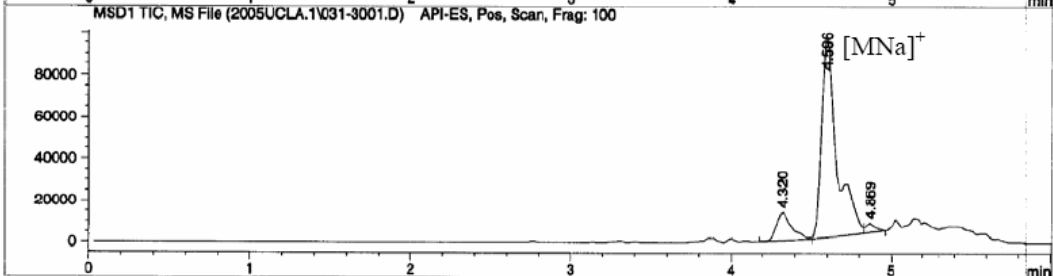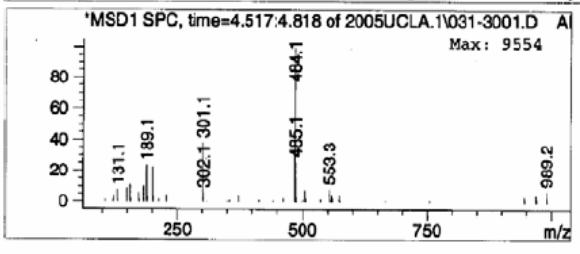

4-Butylsulfanyl-1-(4-toluenesulfonyl)-6-(p-tolyl)-piperidine-3-carboxylic acid (B01C02E22)

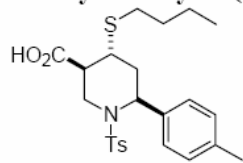

C<sub>24</sub>H<sub>31</sub>NO<sub>4</sub>S<sub>2</sub>  
 Exact Mass: 461.17  
 Mol. Wt.: 461.64

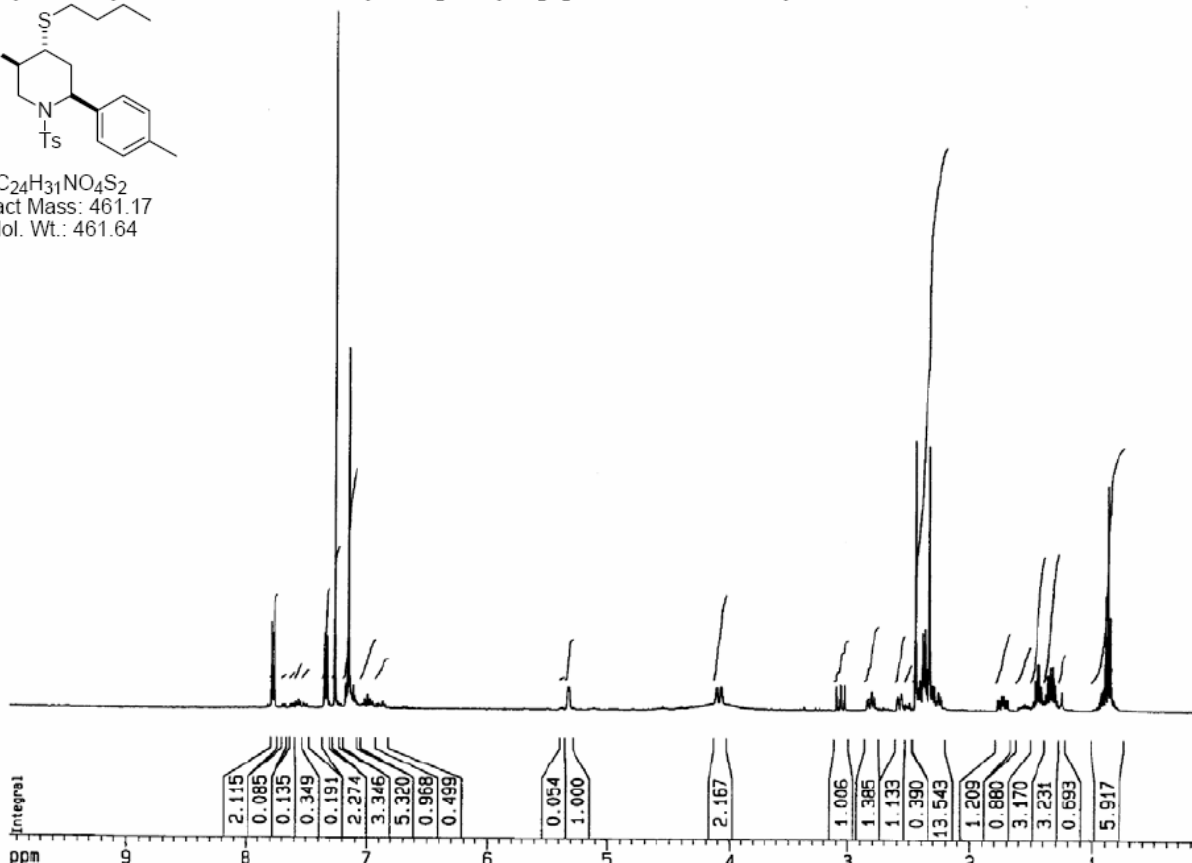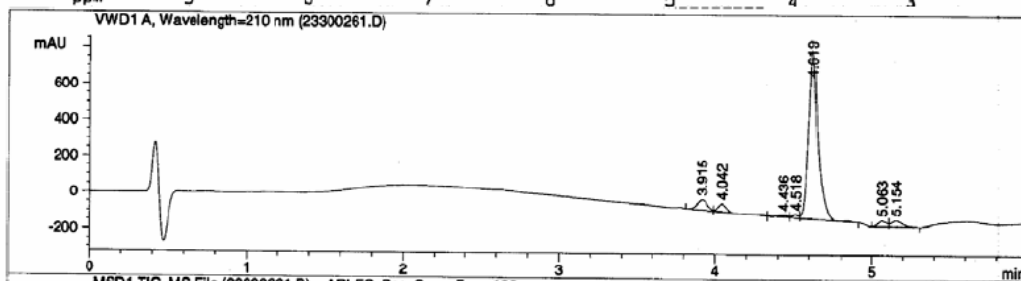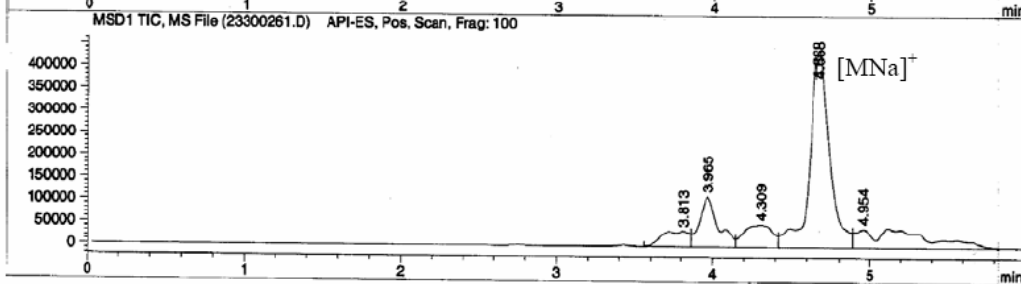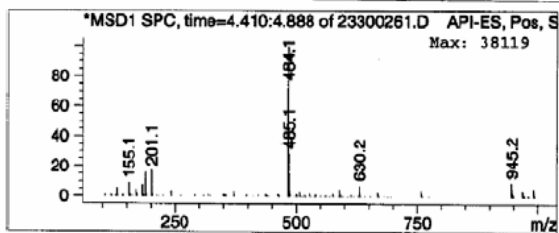

4-(3-Methylbutylsulfanyl)-1-(4-toluenesulfonyl)-6-(*p*-tolyl)-piperidine-3-carboxylic acid (B01C02E23)

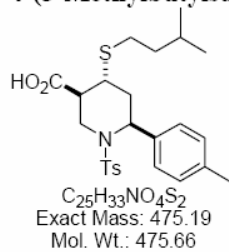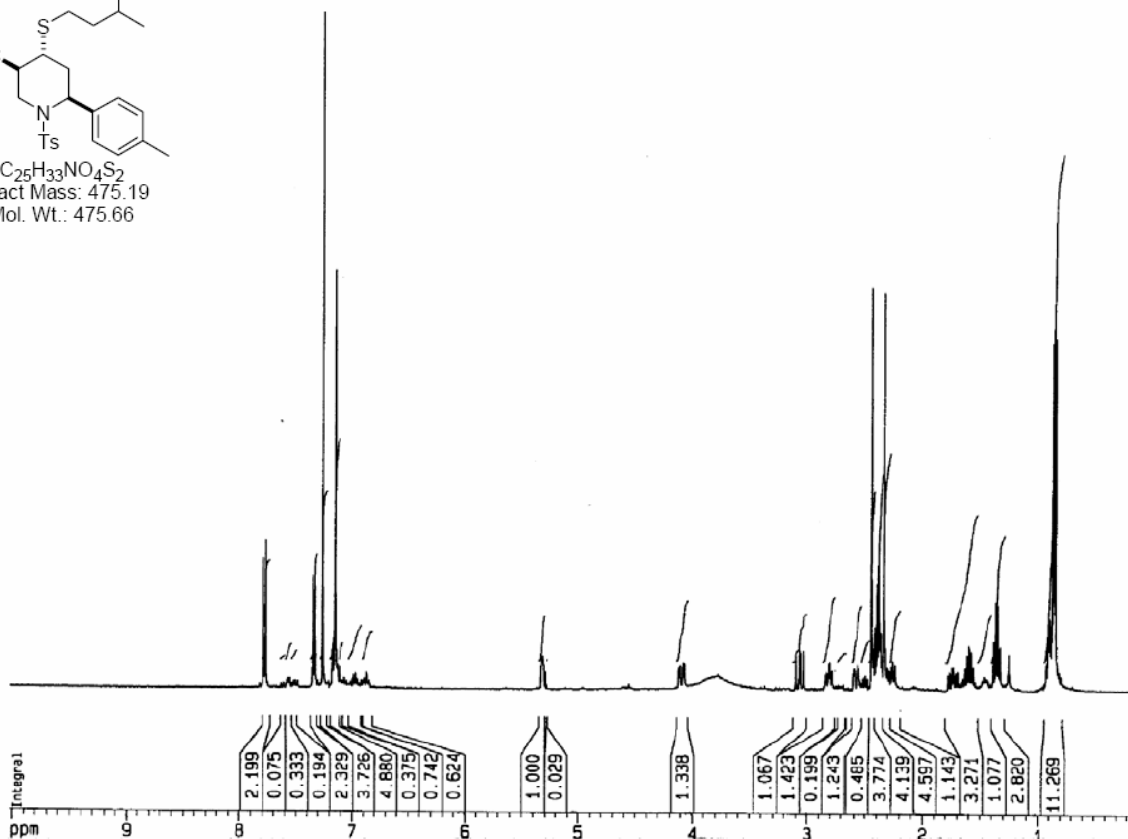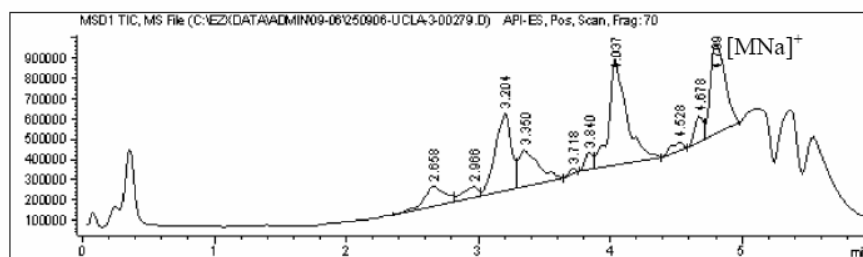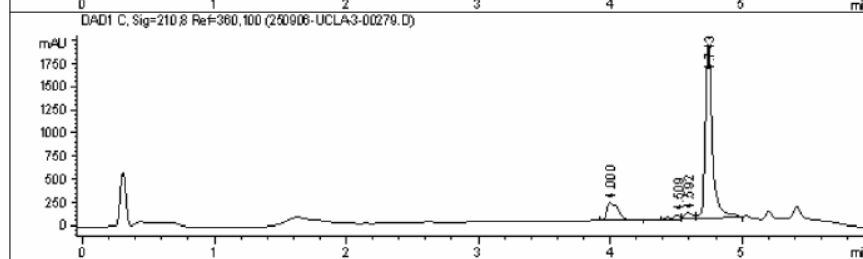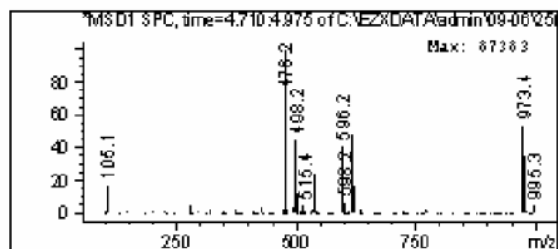

4-Pentylsulfanyl-1-(4-toluenesulfonyl)-6-(*p*-tolyl)-piperidine-3-carboxylic acid (B01C02E24)

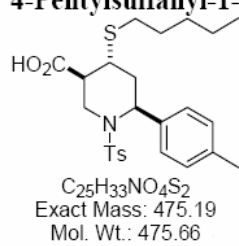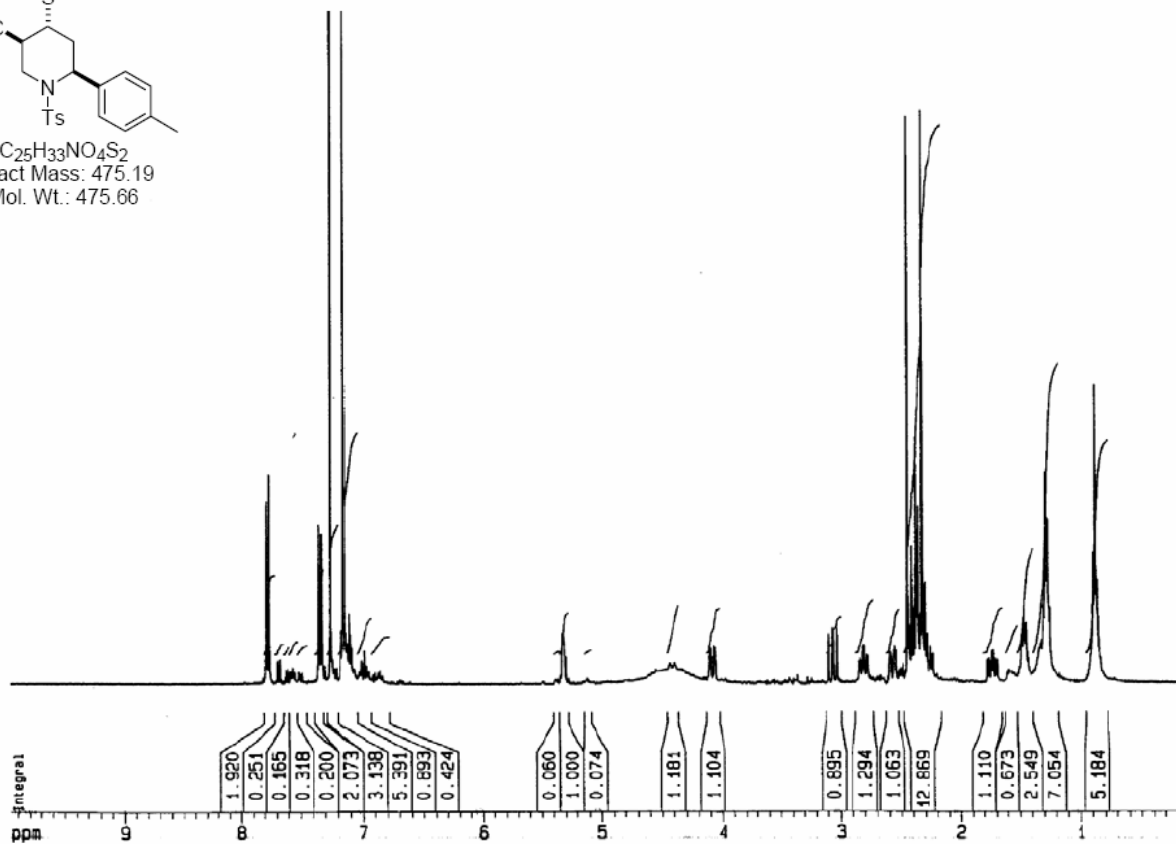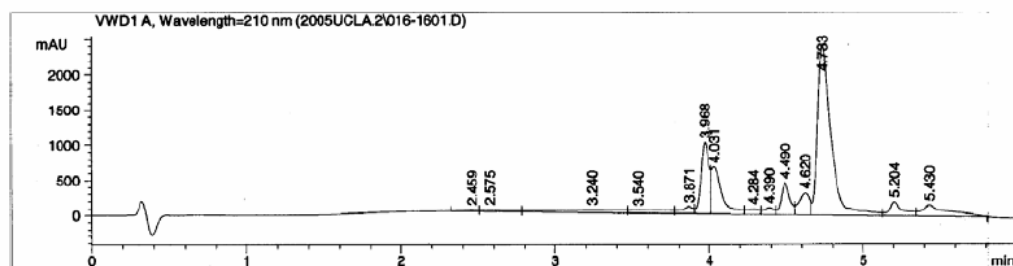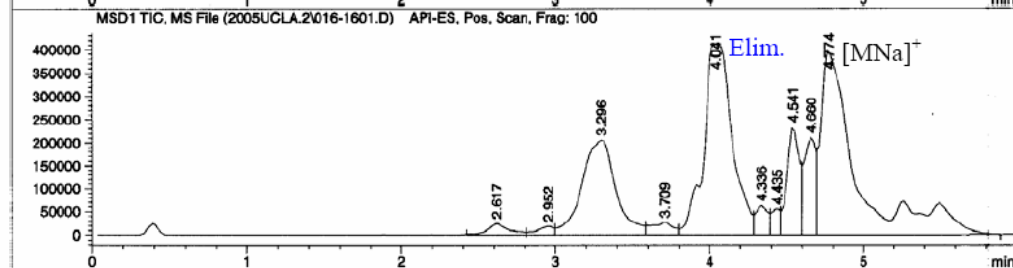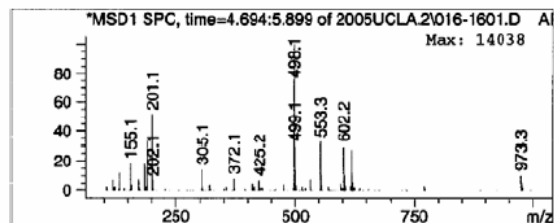

4-Hexylsulfanyl-1-(4-toluenesulfonyl)-6-(*p*-tolyl)-piperidine-3-carboxylic acid (B01C02E25)

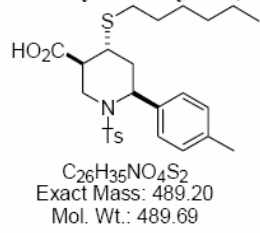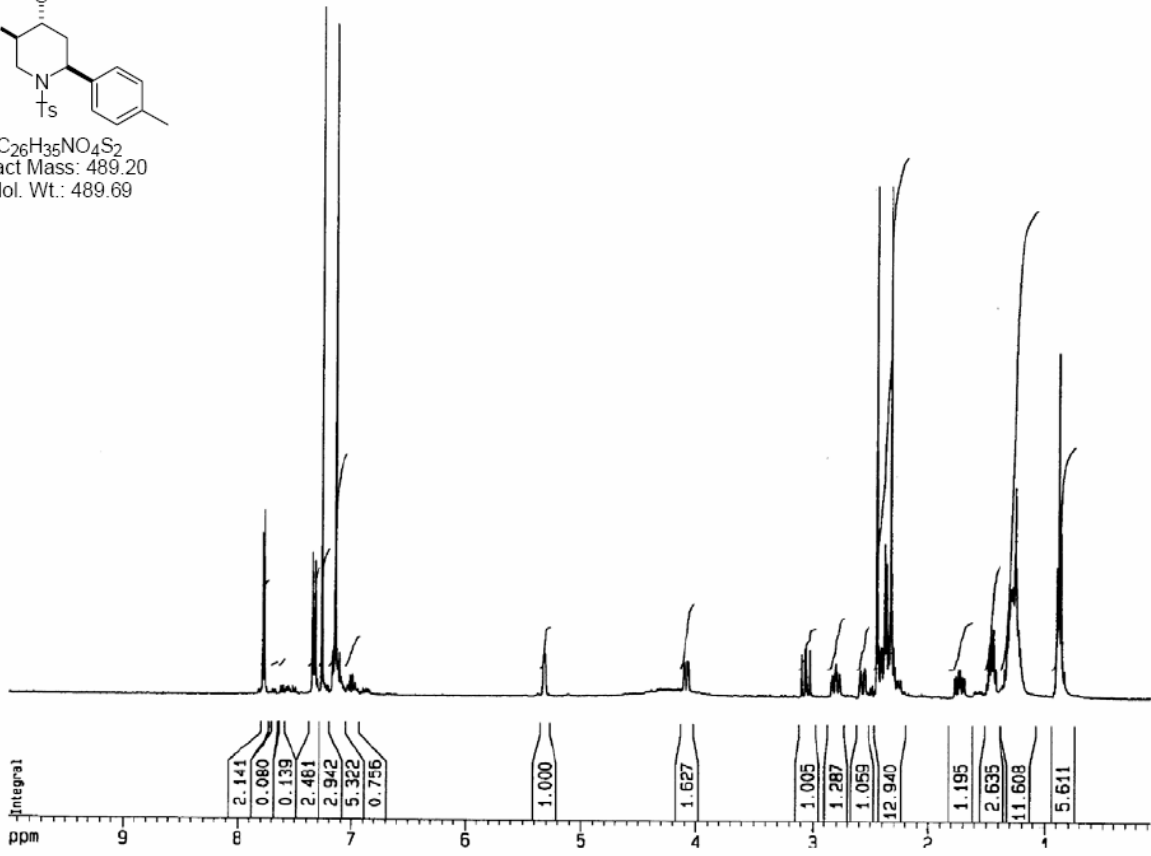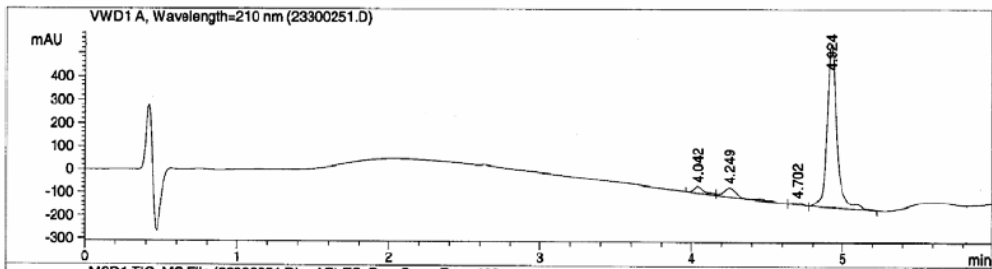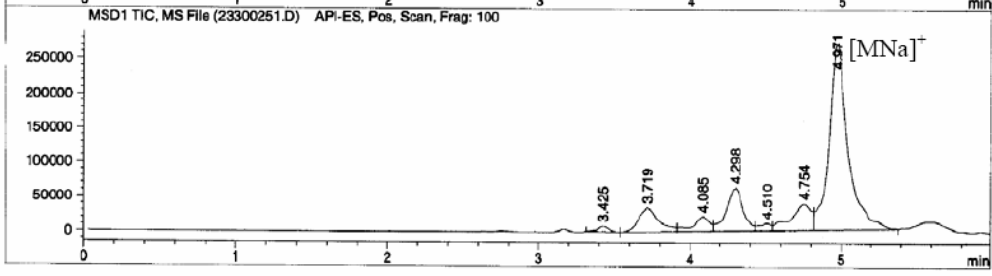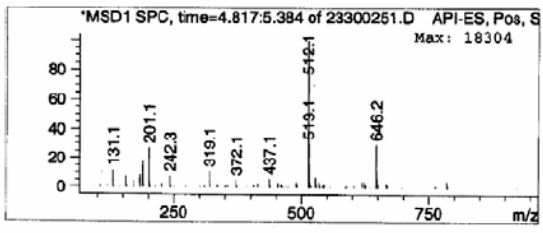

4-Heptylsulfanyl-6-phenyl-1-(4-toluenesulfonyl)-piperidine-3-carboxylic acid (B01C01E26)

Not included

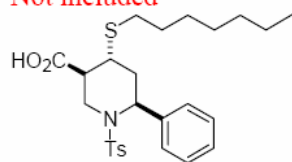

C<sub>26</sub>H<sub>35</sub>NO<sub>4</sub>S<sub>2</sub>  
Exact Mass: 489.20  
Mol. Wt.: 489.69

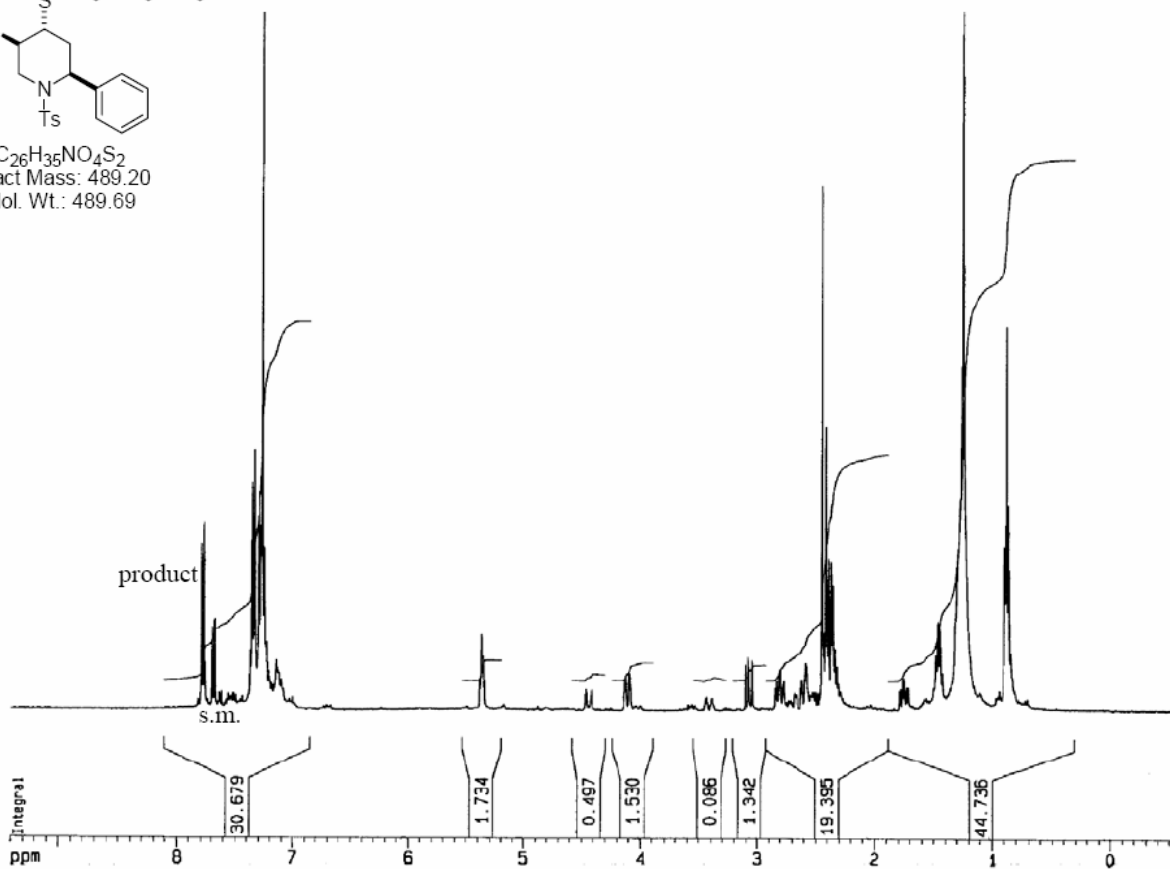

4-Decylsulfanyl-6-phenyl-1-(4-toluenesulfonyl)-piperidine-3-carboxylic acid (B01C01E27)

Not included

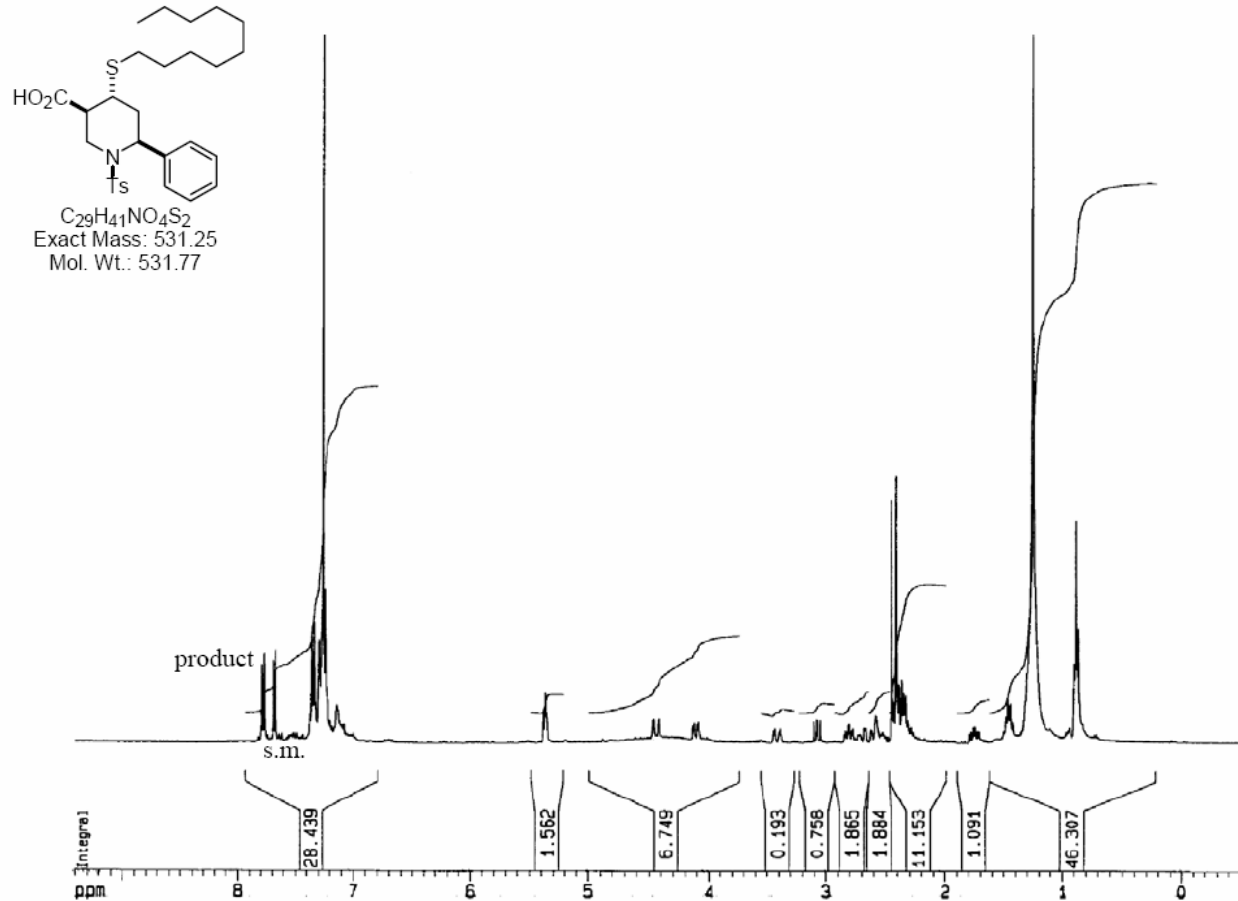

4-Cyclopentylsulfanyl-1-(toluene-4-sulfonyl)-6-*p*-tolylpiperidine-3-carboxylic acid (B01C02E28)

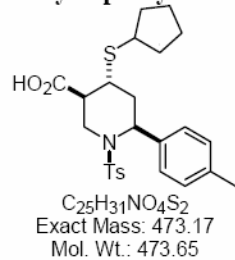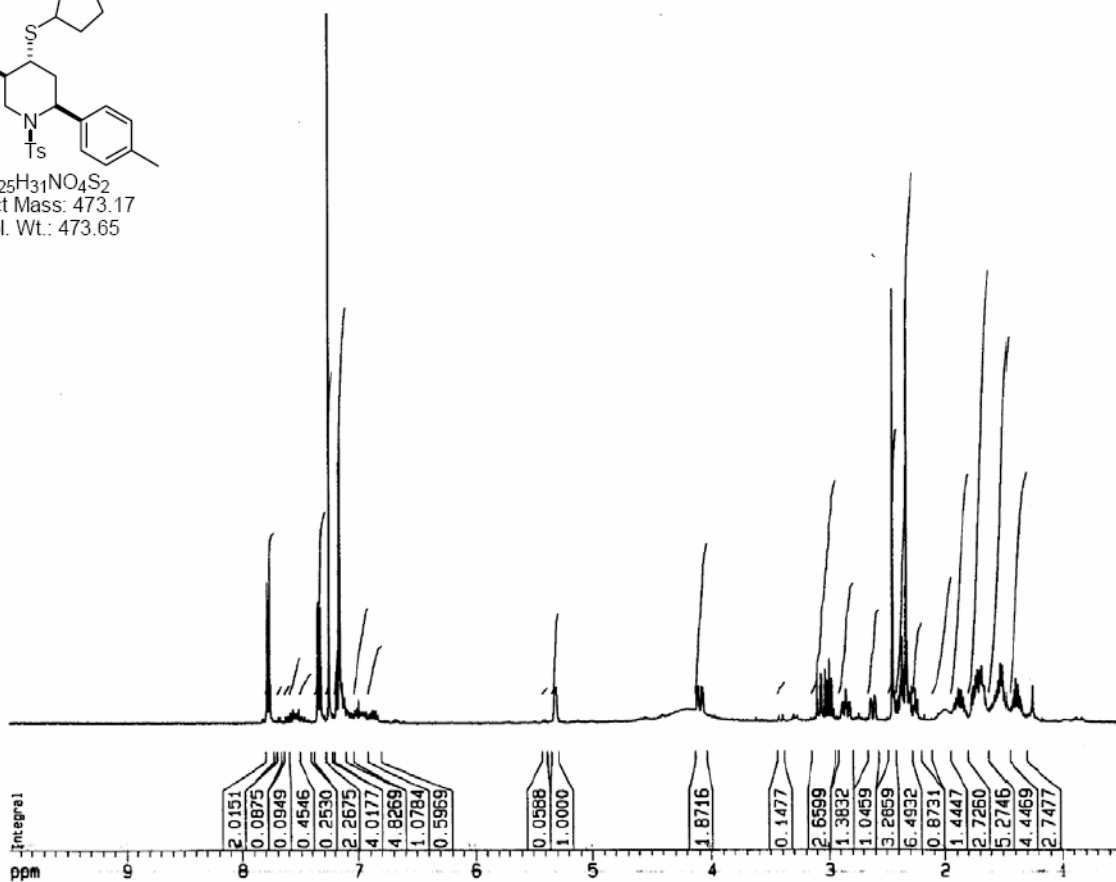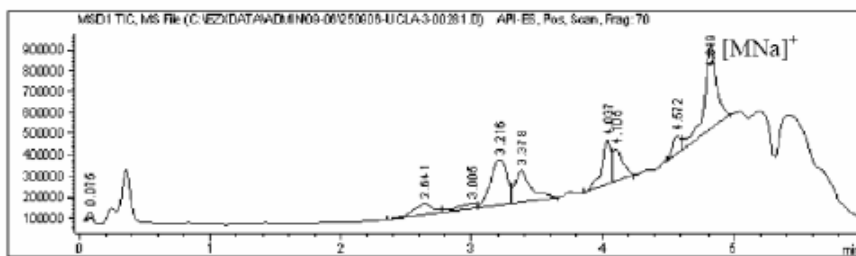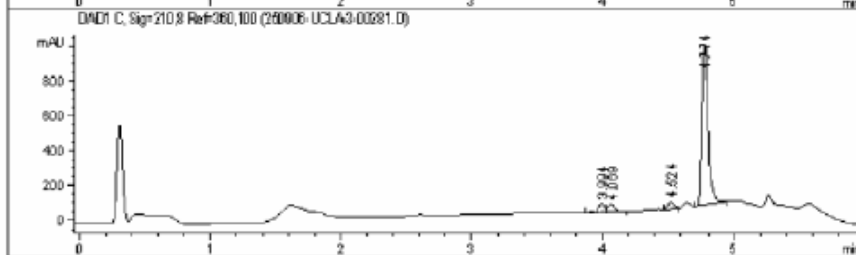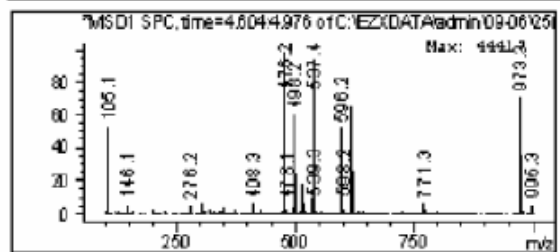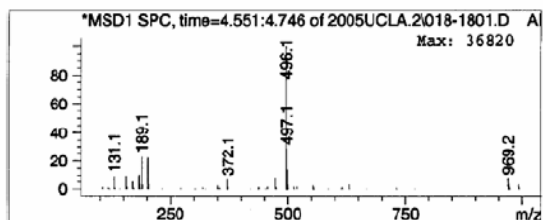



4-Cyclohexylsulfanyl-1-(4-toluenesulfonyl)-6-(*p*-tolyl)-piperidine-3-carboxylic acid (B01C02E29)

Not included

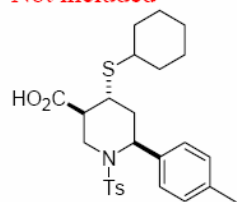

C<sub>26</sub>H<sub>33</sub>NO<sub>4</sub>S<sub>2</sub>  
Exact Mass: 487.19  
Mol. Wt.: 487.67

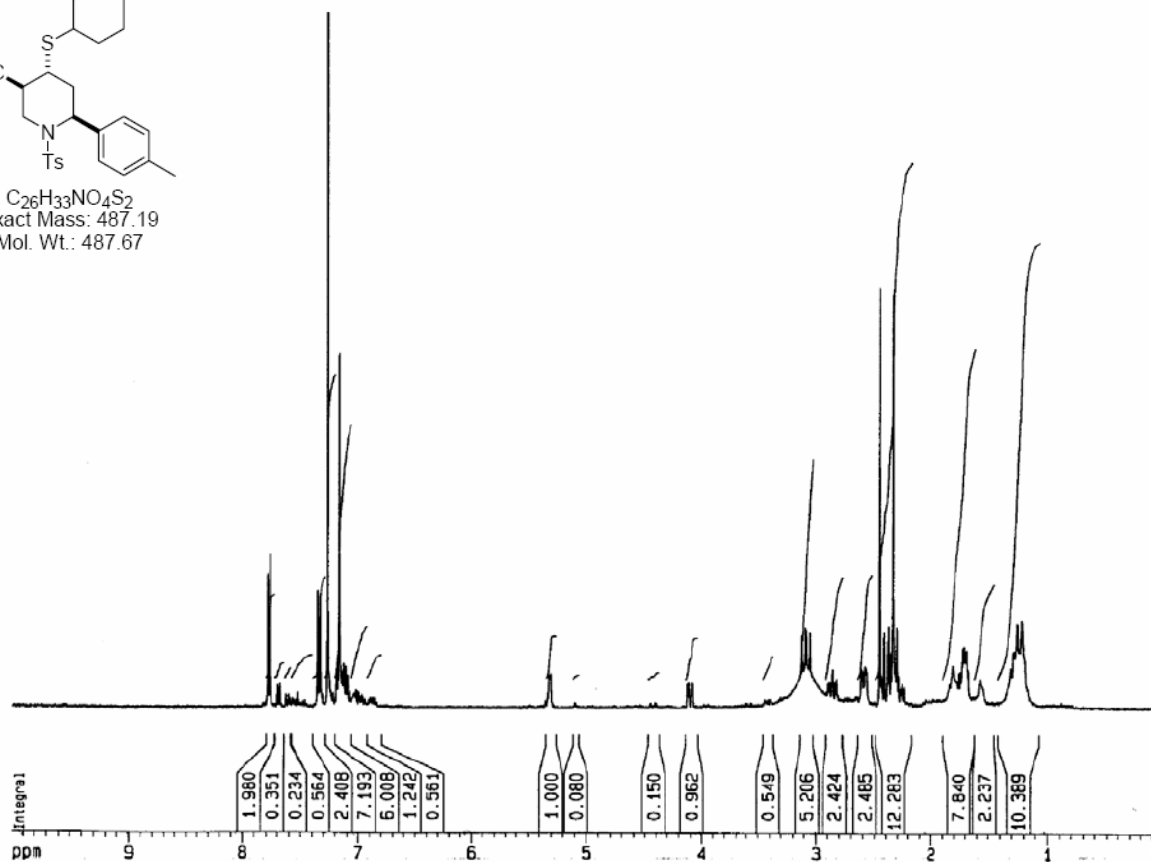

4-Allylsulfanyl-1-(4-toluenesulfonyl)-6-(*p*-tolyl)-piperidine-3-carboxylic acid (B01C02E30)

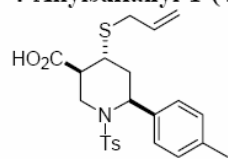

C<sub>23</sub>H<sub>27</sub>NO<sub>4</sub>S<sub>2</sub>  
 Exact Mass: 445.14  
 Mol. Wt.: 445.59

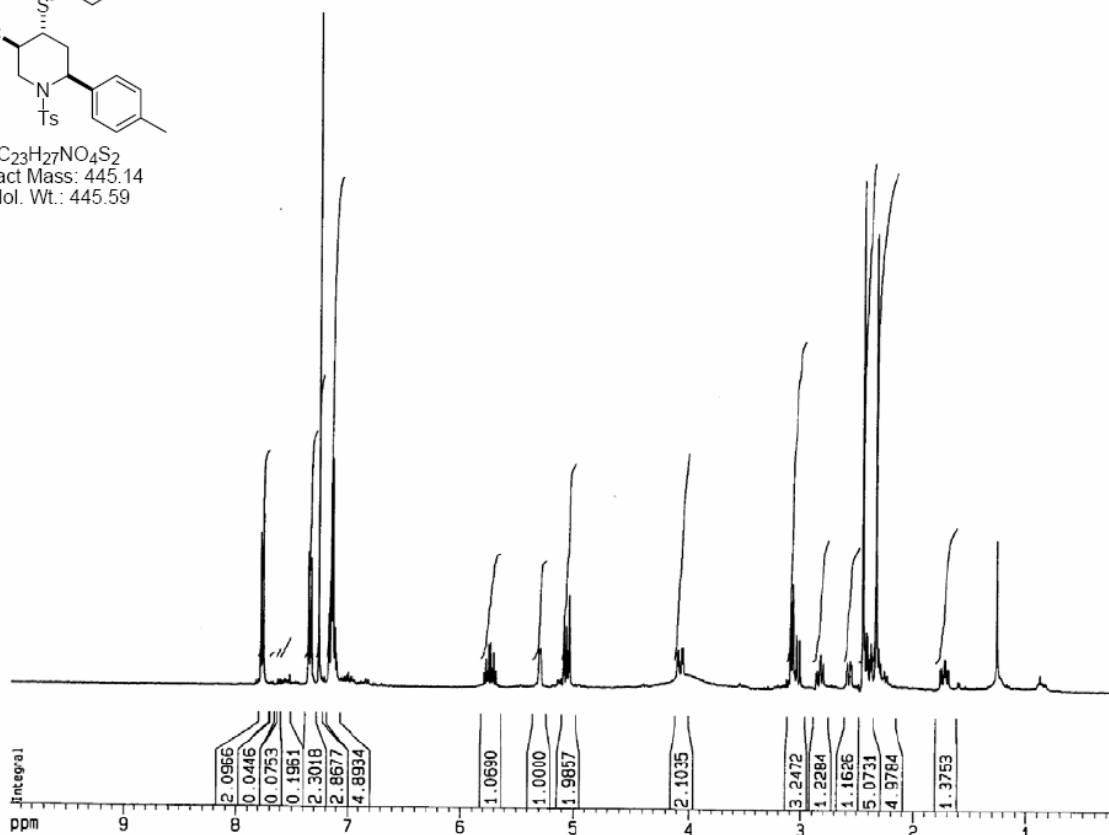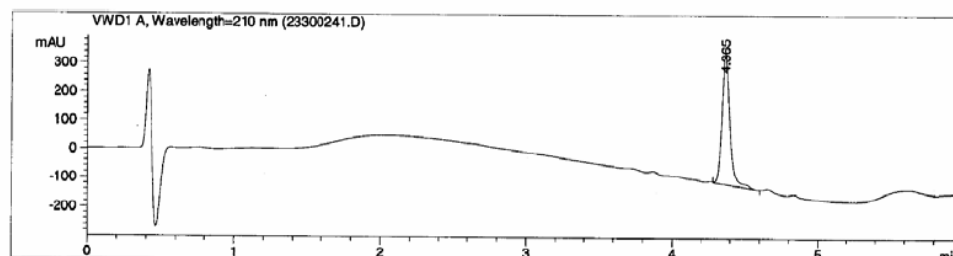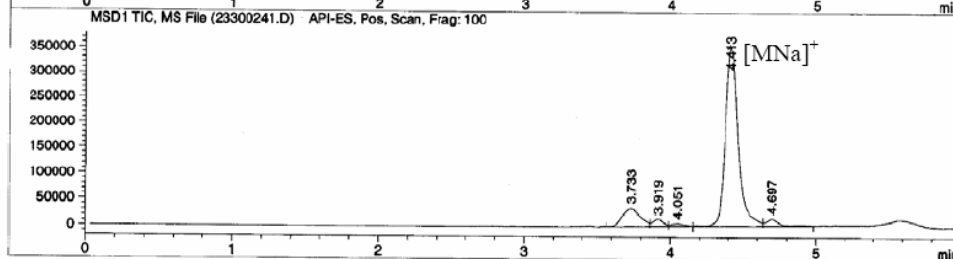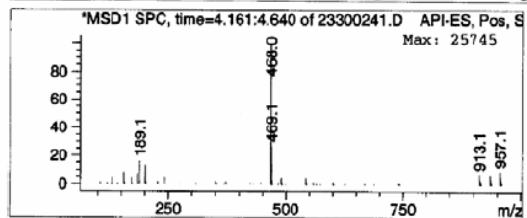

4-(2-Methoxycarbonylethylsulfanyl)-1-(4-toluenesulfonyl)-6-(*p*-tolyl)-piperidine-3-carboxylic acid

acid

(B01C02E31)

Not included

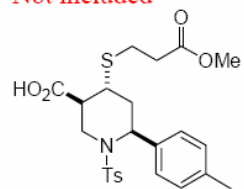

C<sub>24</sub>H<sub>29</sub>NO<sub>6</sub>S<sub>2</sub>  
Exact Mass: 491.14  
Mol. Wt.: 491.62

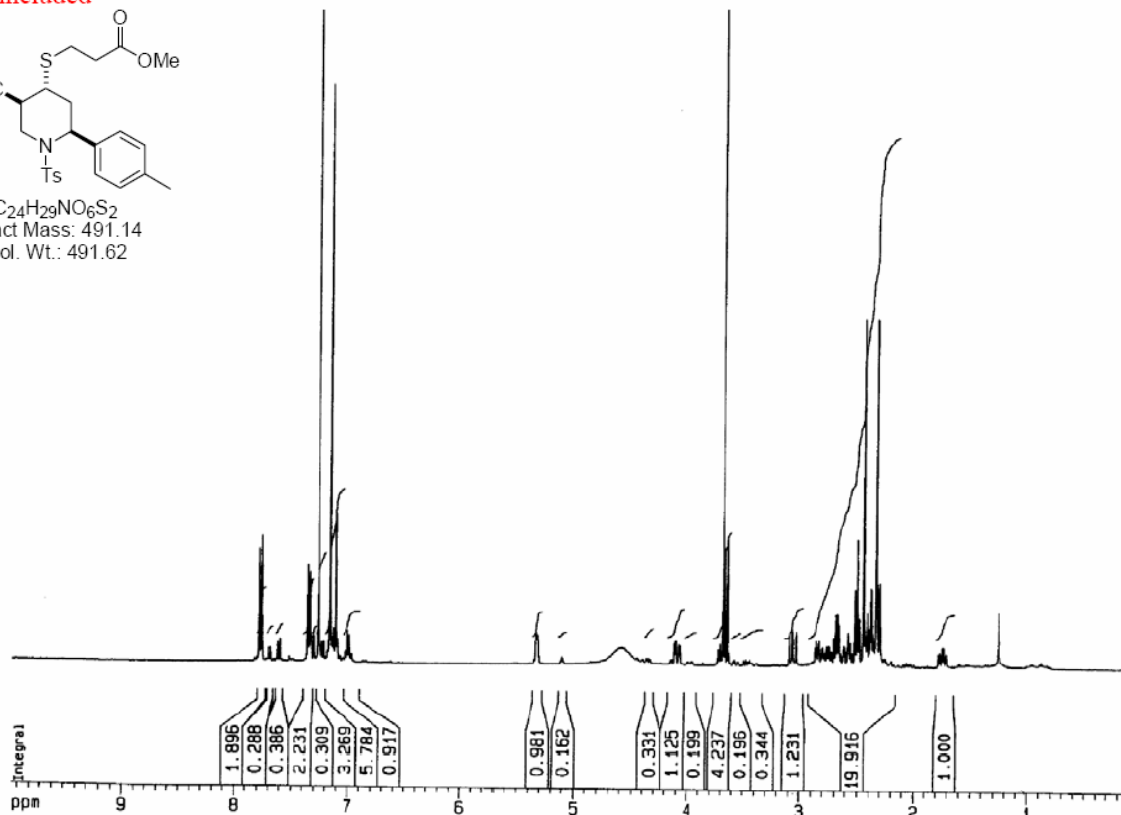

4-(2-*tert*-Butoxycarbonylethylsulfanyl)-1-(4-toluenesulfonyl)-6-(*p*-tolyl)-piperidine-3-carboxylic acid  
(B01C02E32)  
Not included

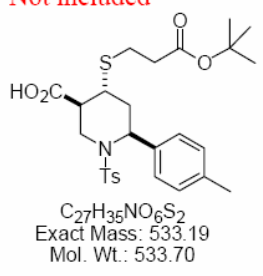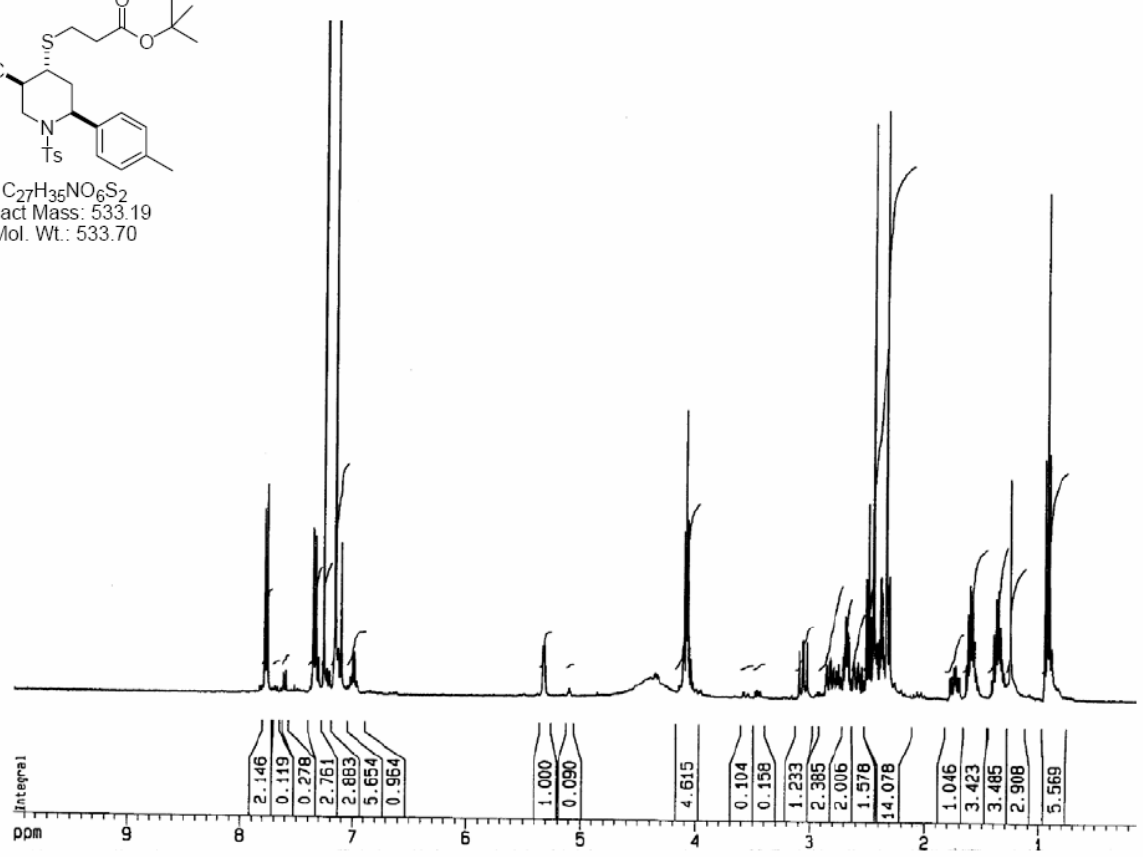

Supplement: NIHMS63737-supplement-6si20070310_06.pdf [file NIHMS63737-supplement-6si20070310_06.pdf]
