# Supplementary material
Source: PubMed Central journal article supplement (PMC2543057)

Supporting Information, Part E

**Small-Molecule Inhibitors of Protein Geranylgeranyltransferase Type I**

Sabrina Castellano, Hannah D. G. Fiji, Sape S. Kinderman, Masaru Watanabe,<sup>1</sup> Fuyuhiko Tamanoi,<sup>1</sup>  
Ohyun Kwon\*

*Department of Chemistry and Biochemistry, Department of Microbiology, Immunology and Molecular Genetics,  
Jonsson Comprehensive Cancer Center and Molecular Biology Institute, University of California, Los Angeles,  
607 Charles E. Young Drive East, Los Angeles, CA 90095-1569  
[ohyun@chem.ucla.edu](mailto:ohyun@chem.ucla.edu)*

**Contents**

Spectral Data for Table 17

S382

---

<sup>1</sup> Department of Microbiology, Immunology and Molecular Genetics

A04C11

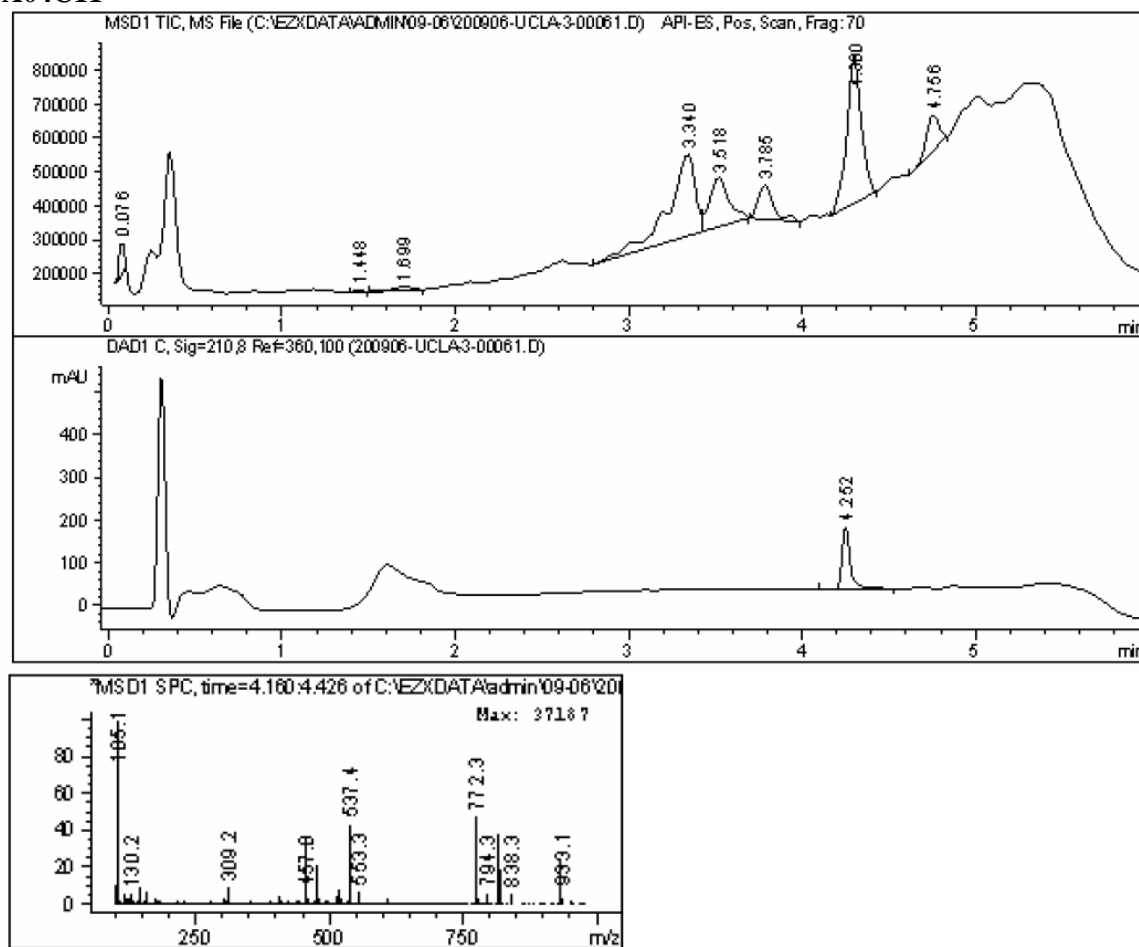

Component 1: Peak at Scan 241.4. Top ions are 454 929 931

# A03C11

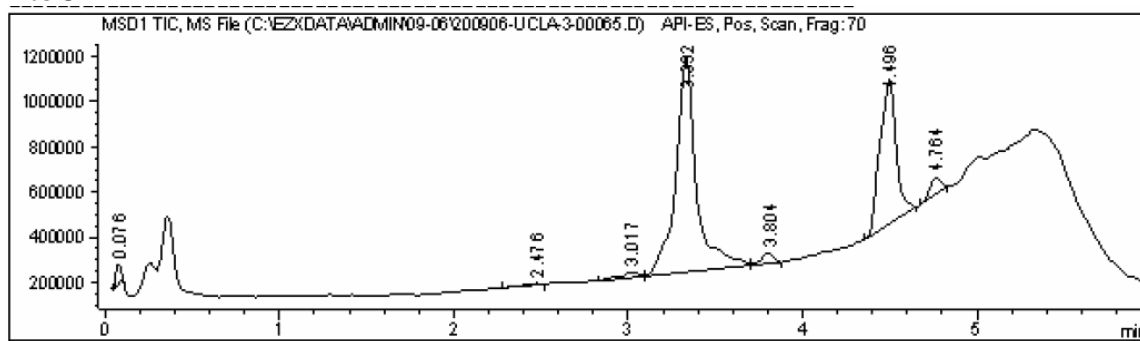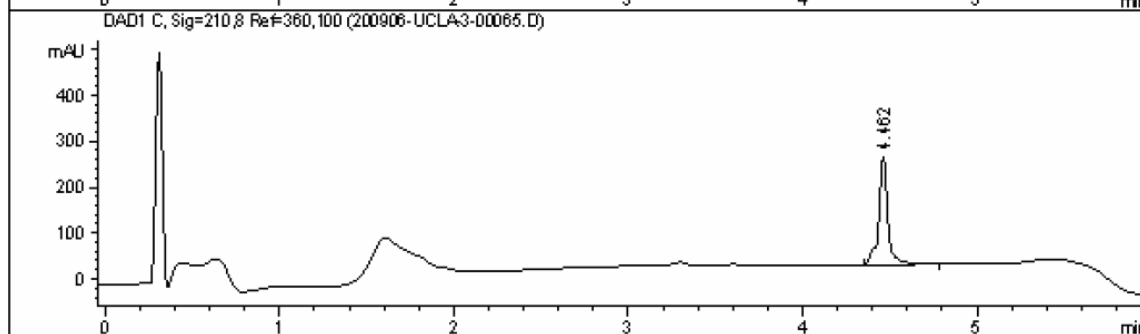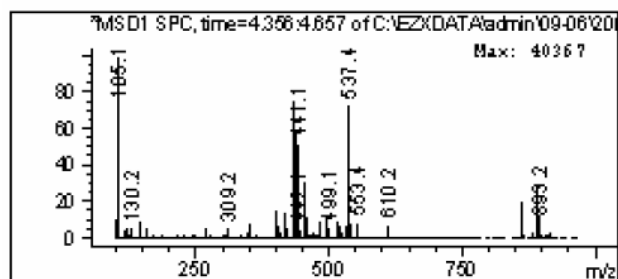

Component 2: Peak at Scan 253.2. Top ions are 434 436 889

# A10C11

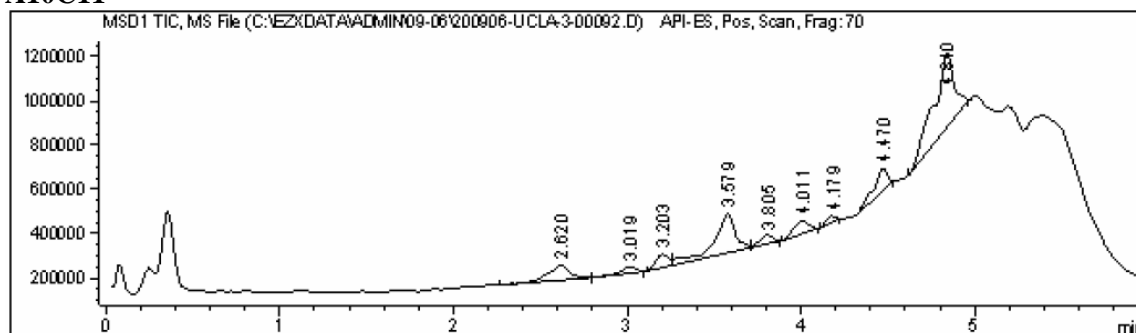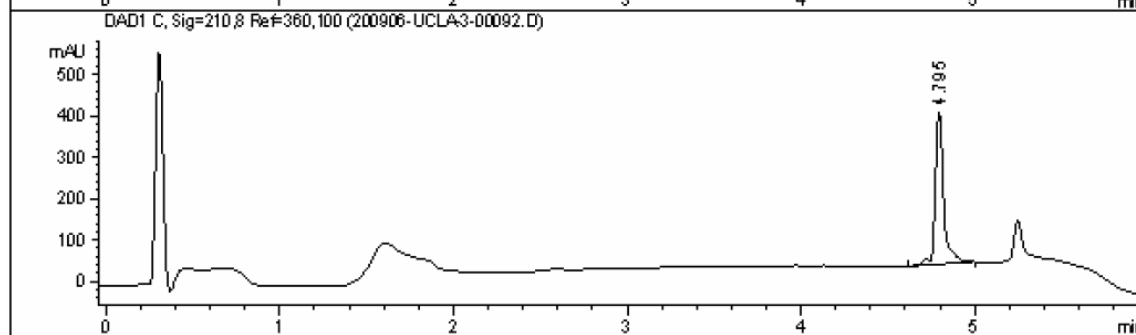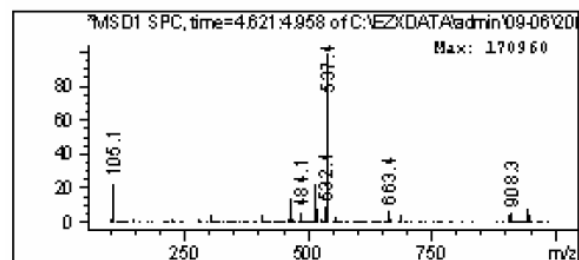

Component 3: Peak at Scan 272.2. Top ions are 462 945 947

A03C13

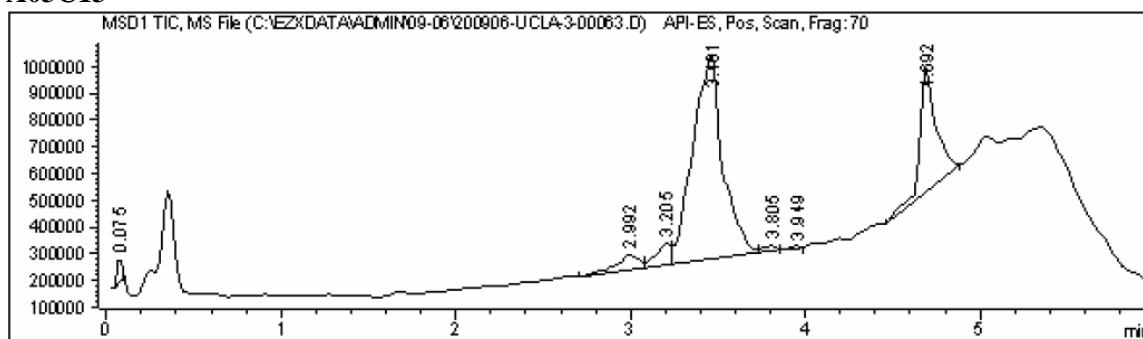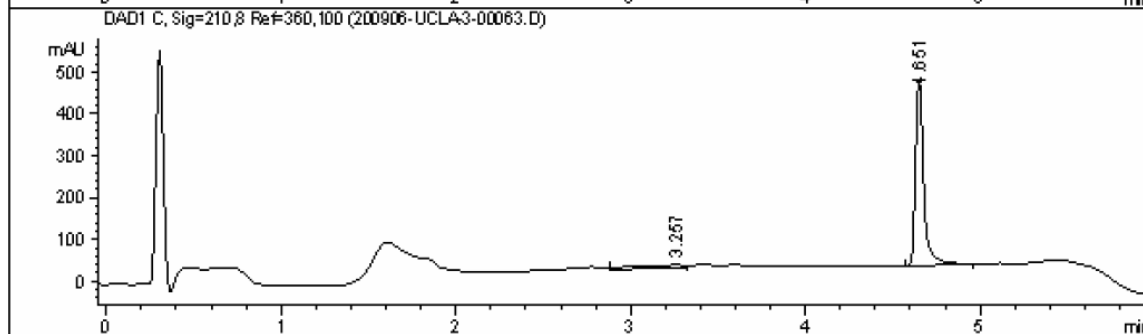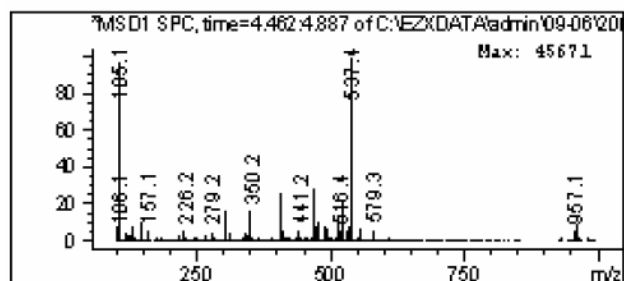

Component 2: Peak at Scan 263.6. Top ions are 468 470 475

A06C01

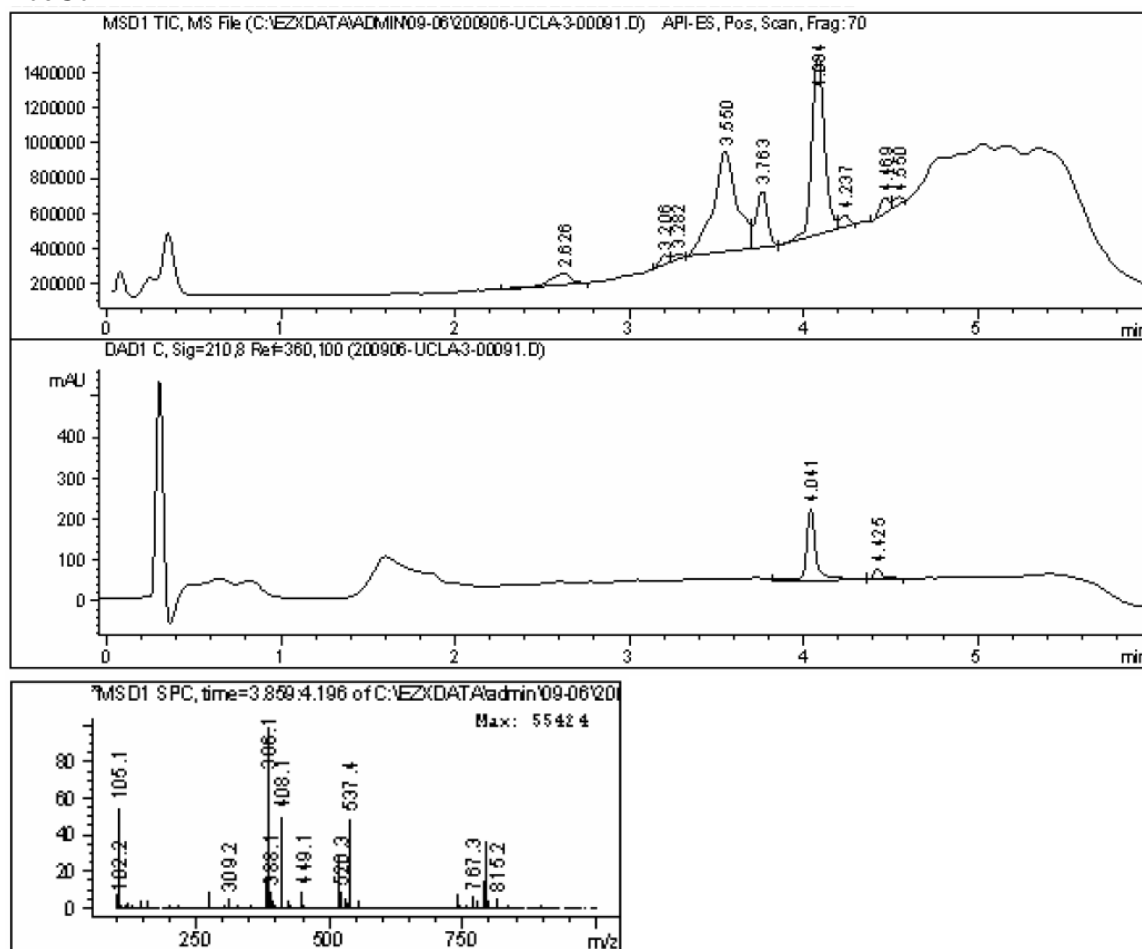

A06C09

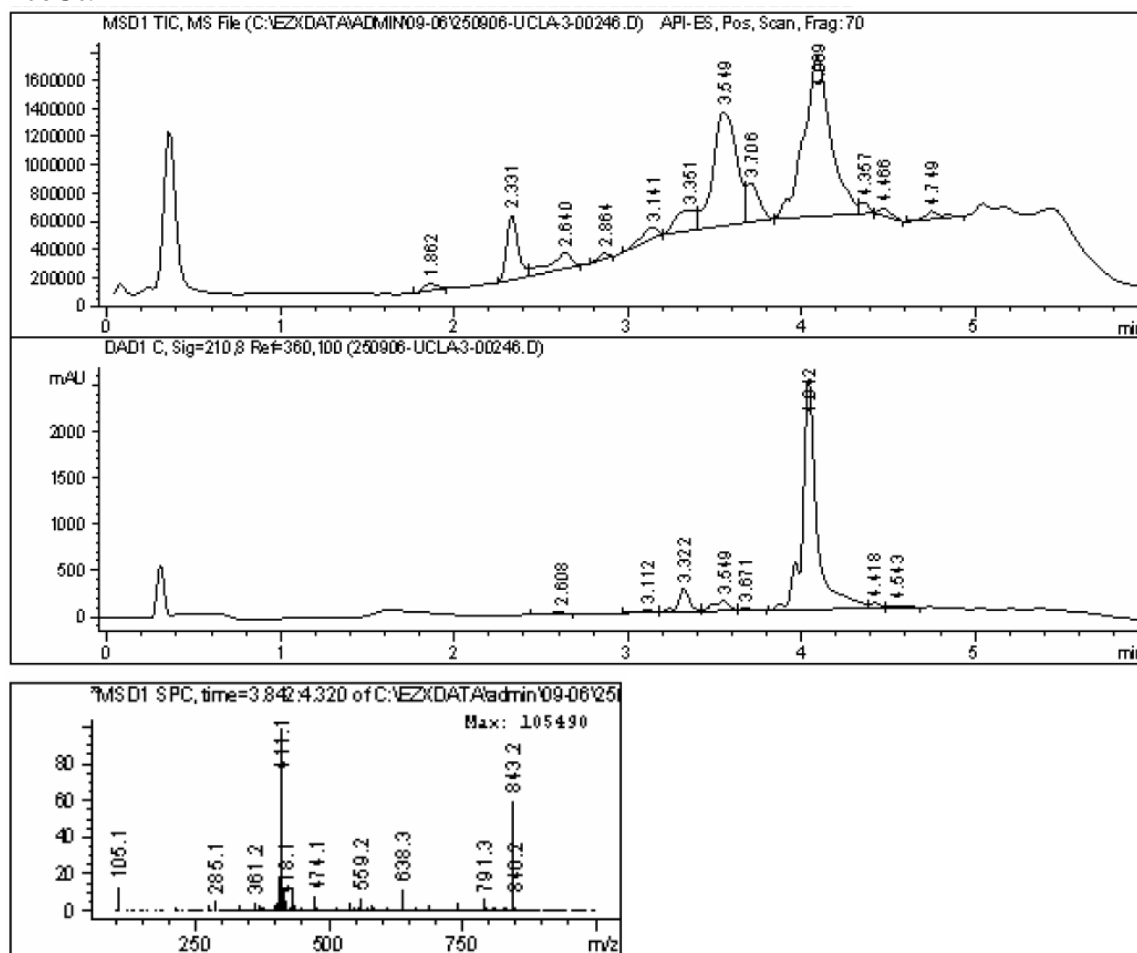

A08C11

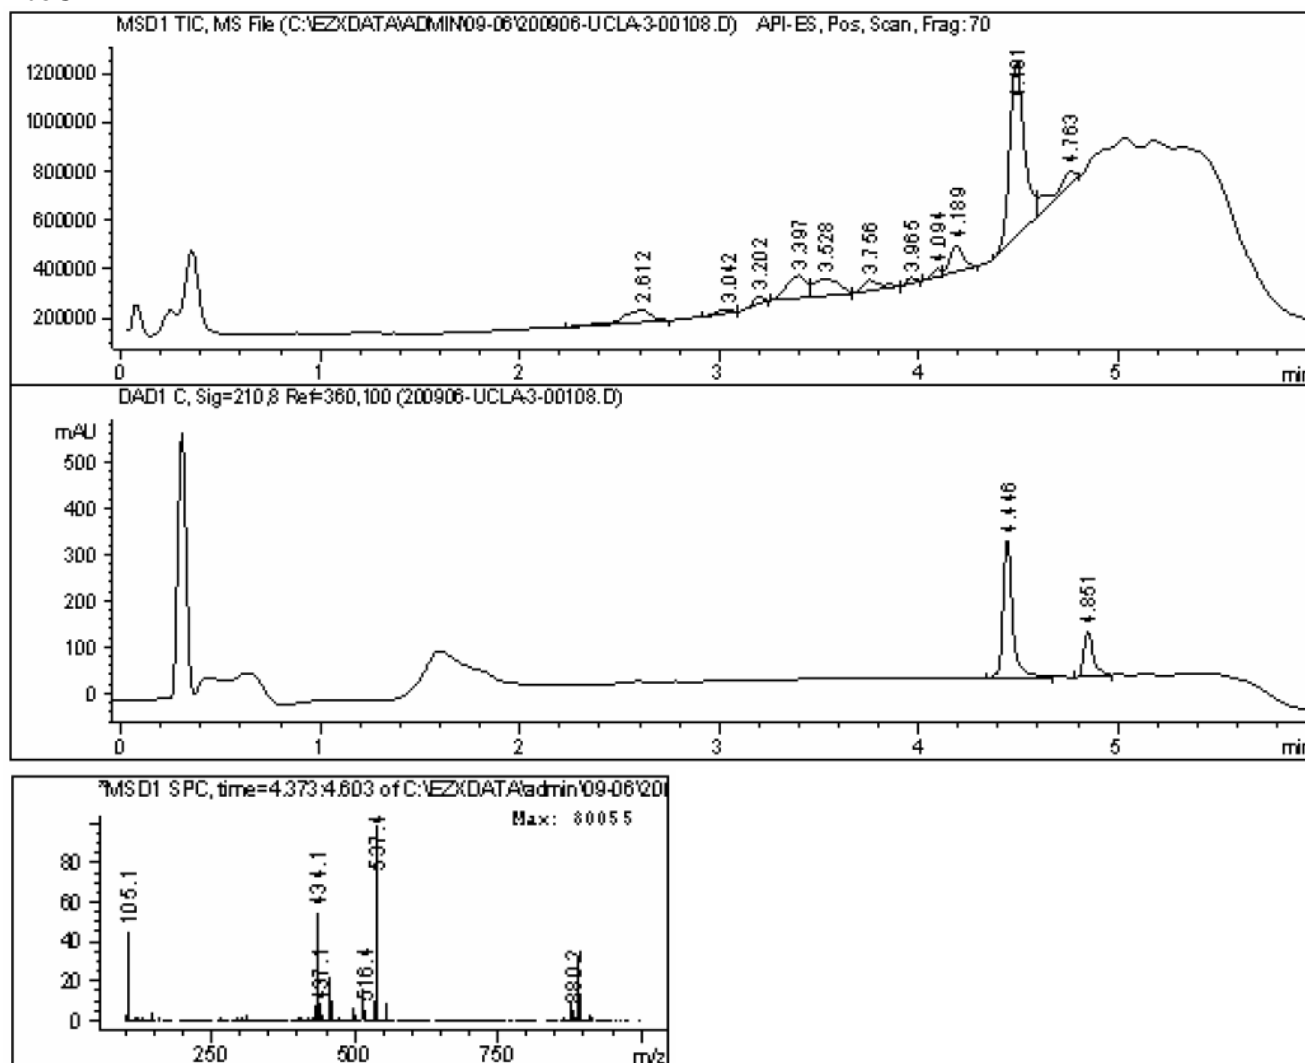



A03C20

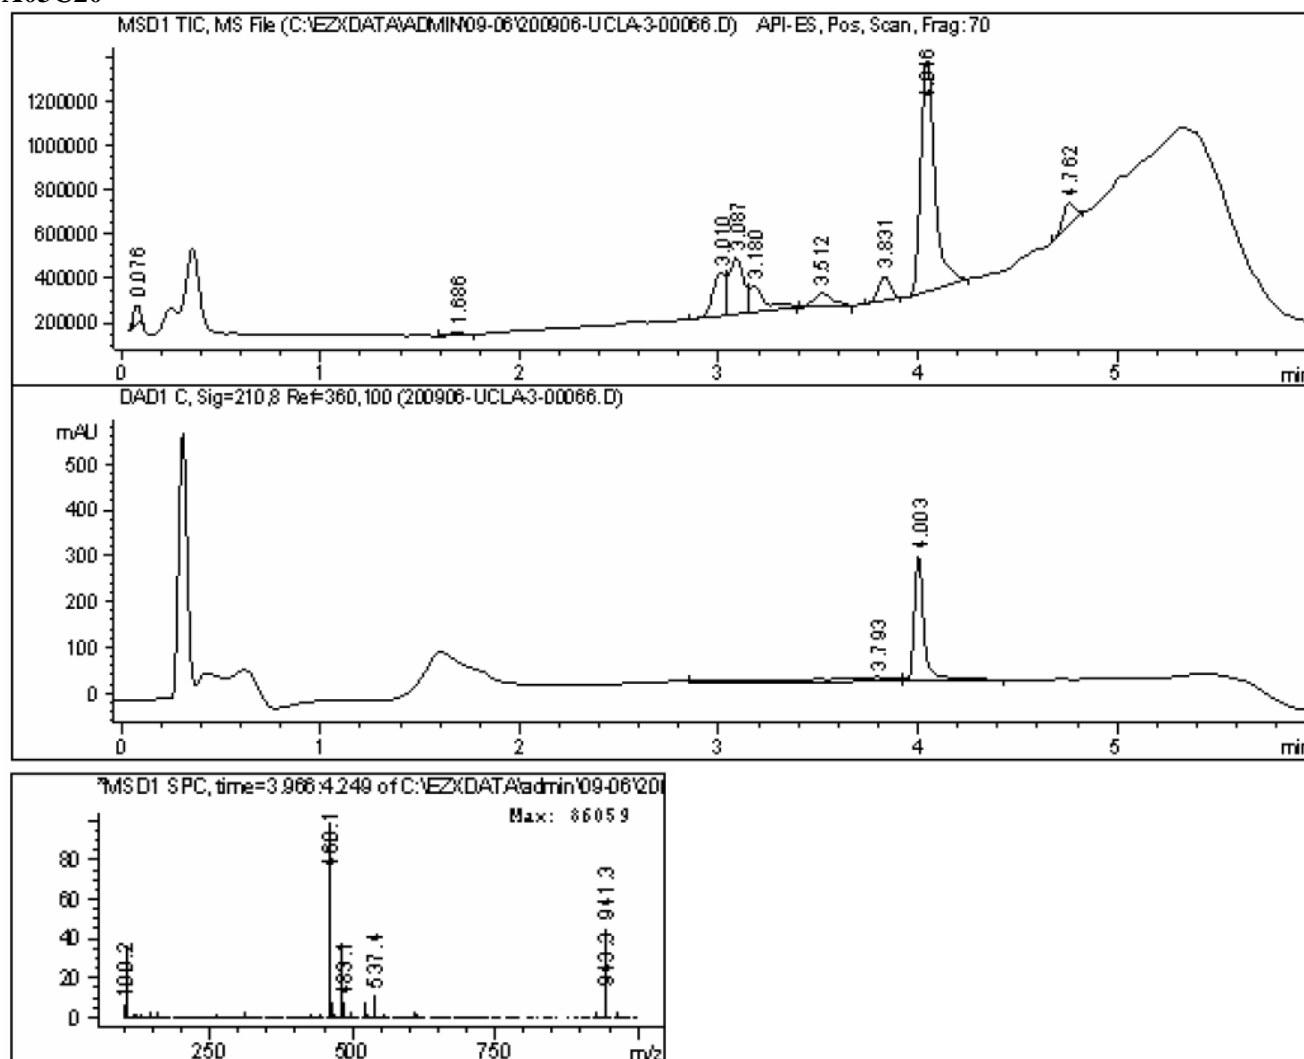

A07C09

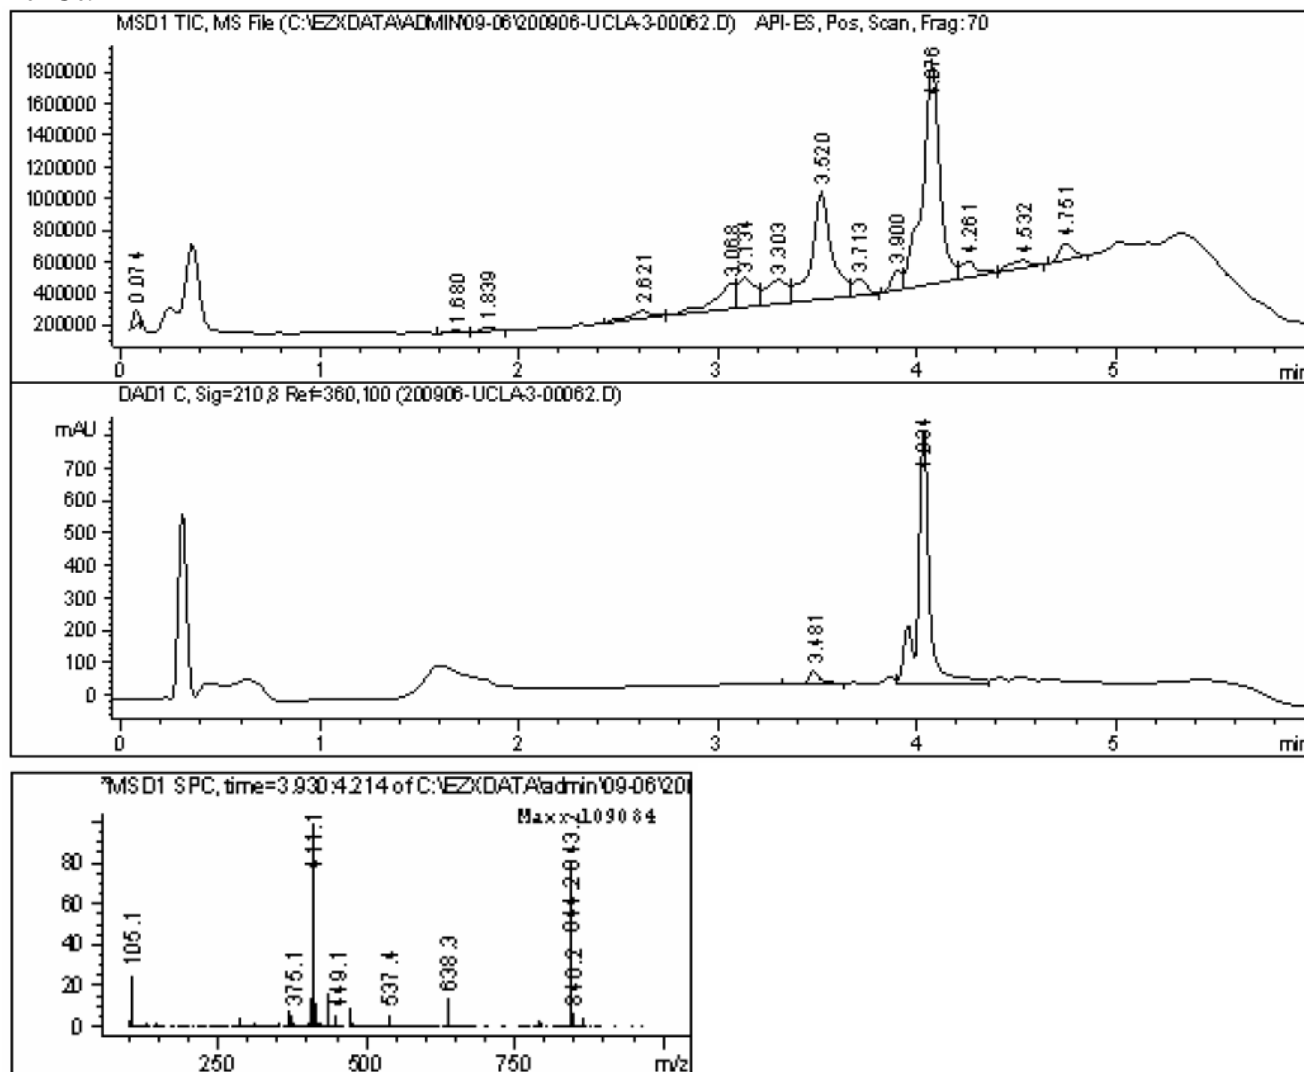

A08C09

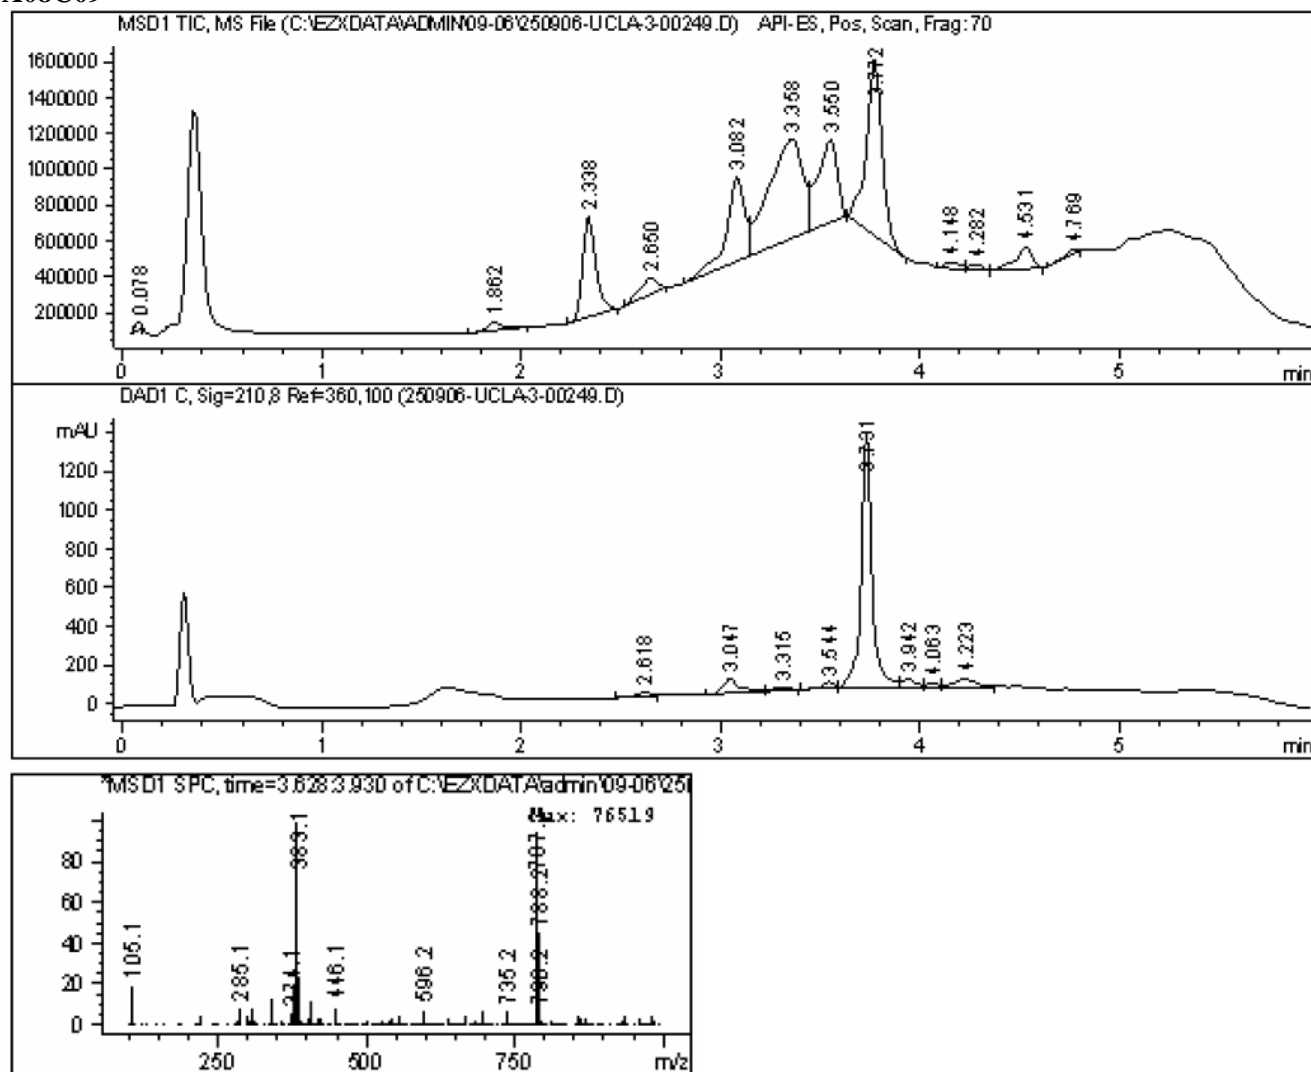

A09C09

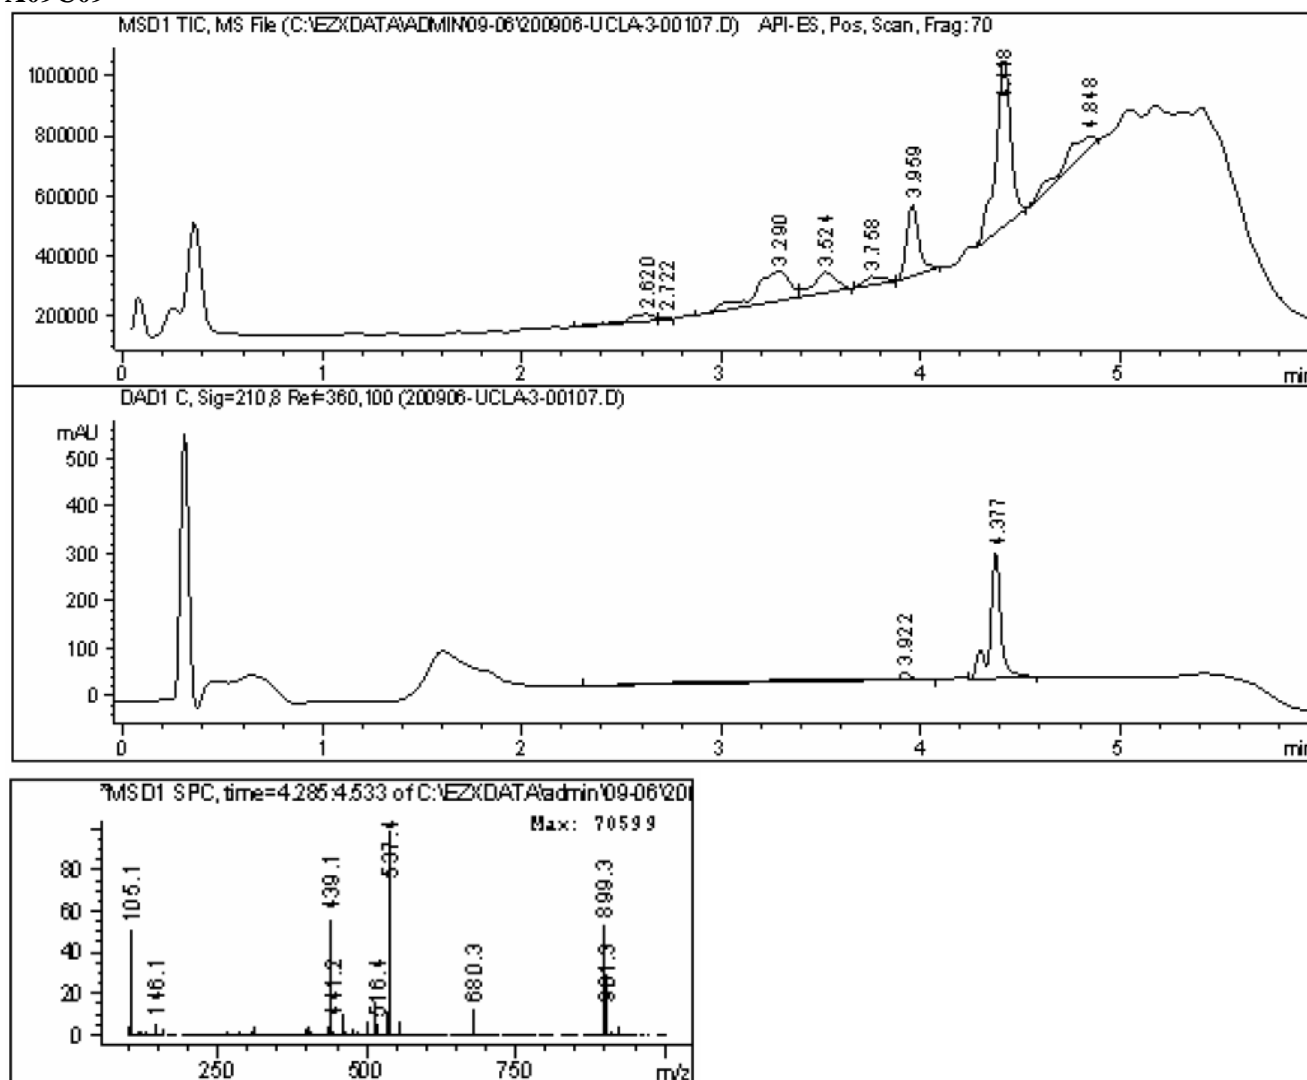

**A07C13E01**

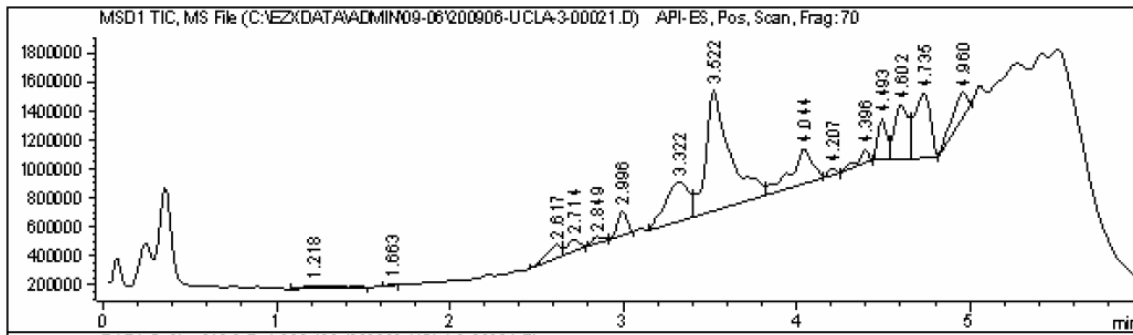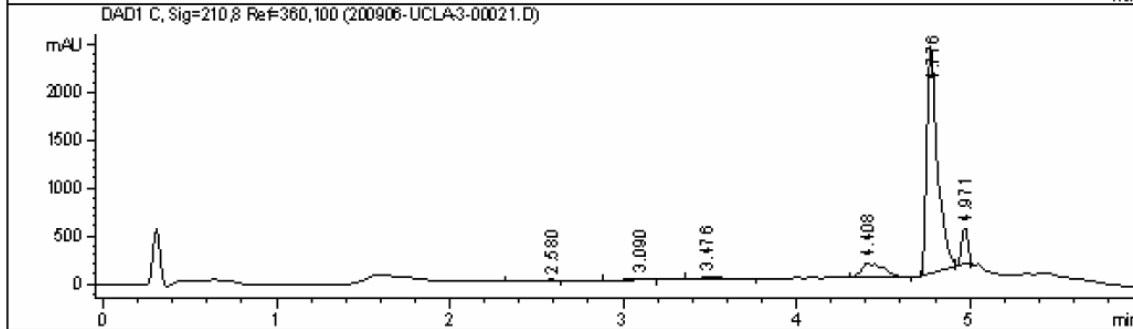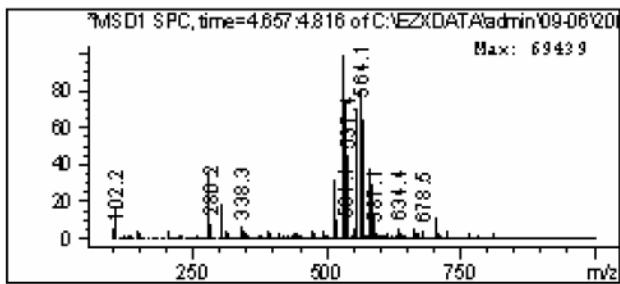

A05C13E01

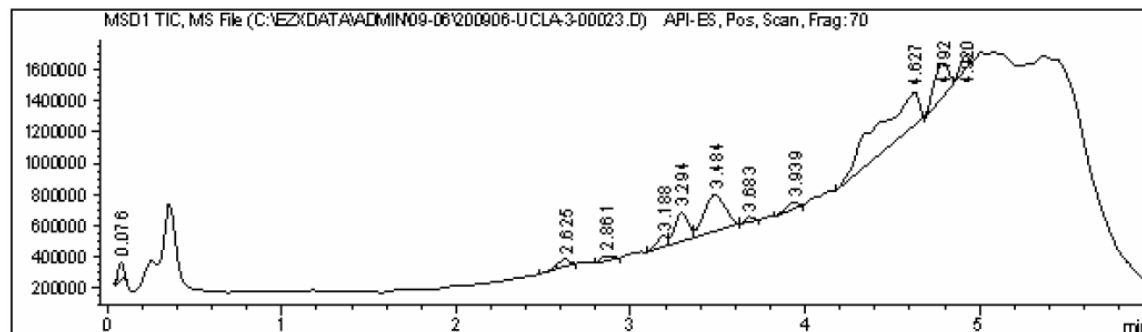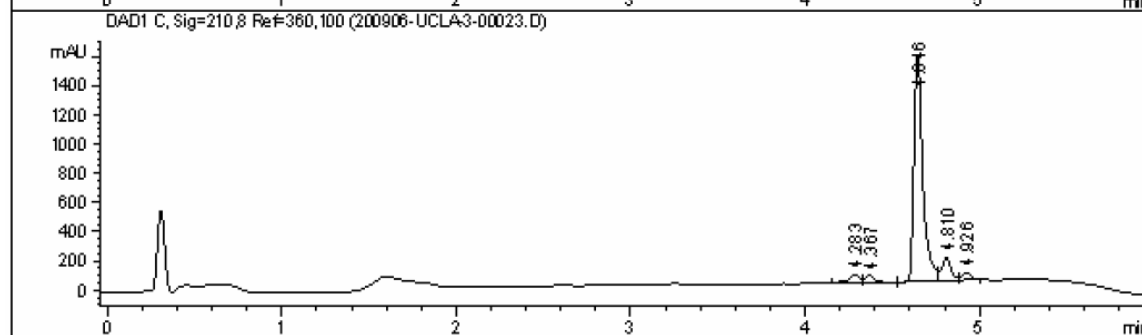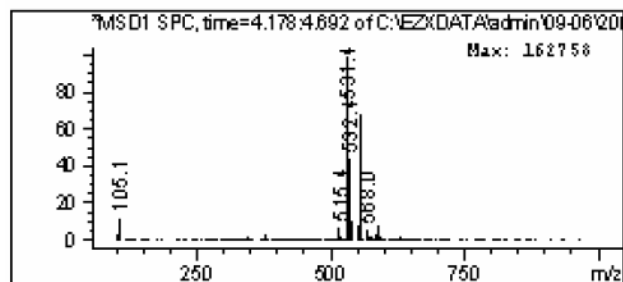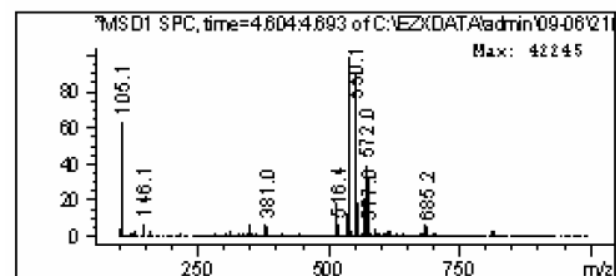

**A05C14E01**

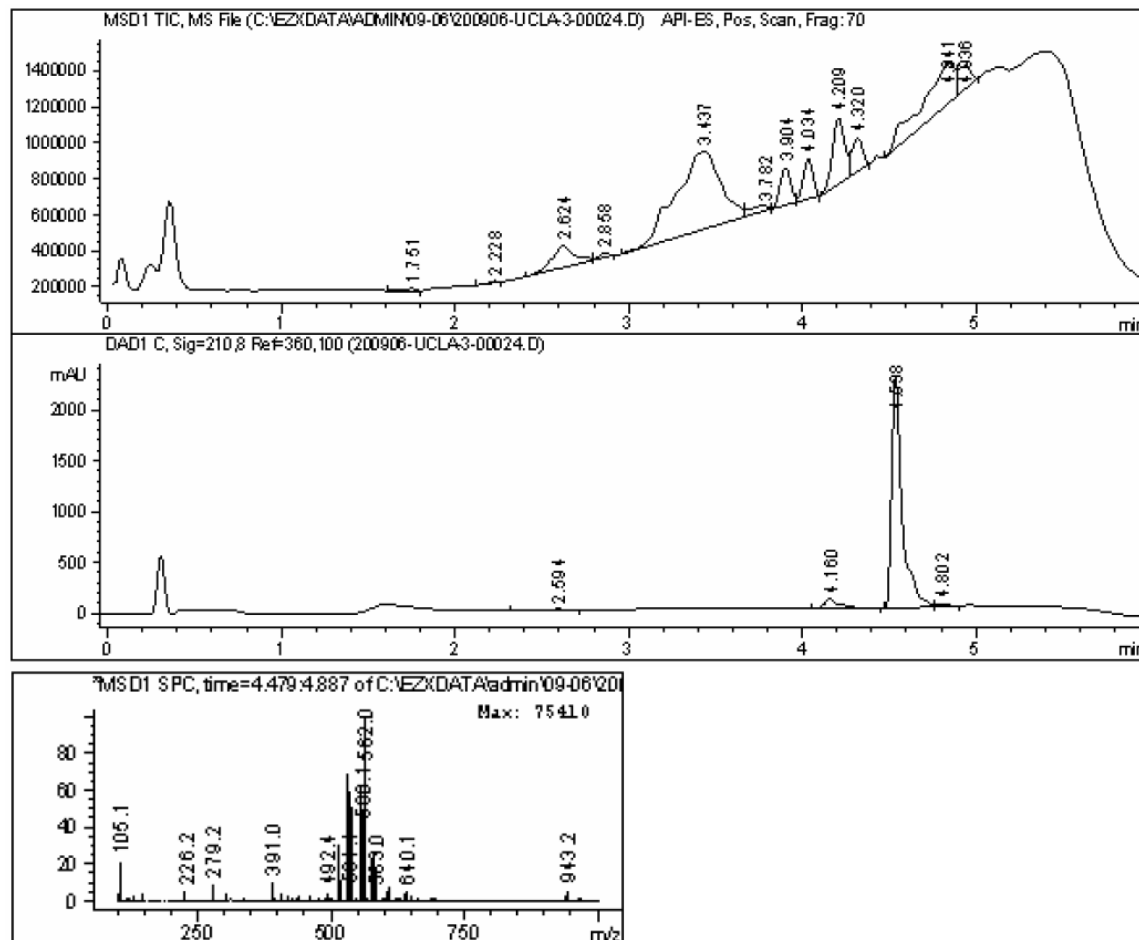

Component 1: Peak at Scan 257.6. Top ions are 562 560 579

A06C09E01

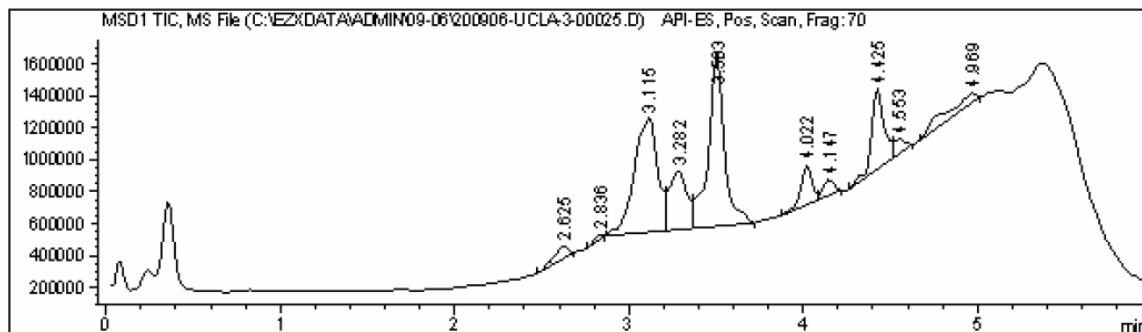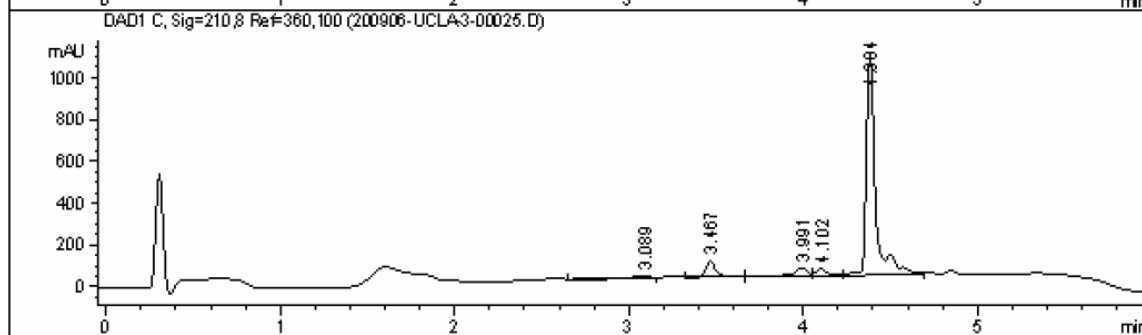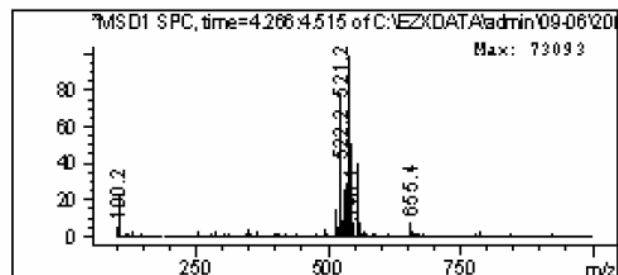



# A06C11E01

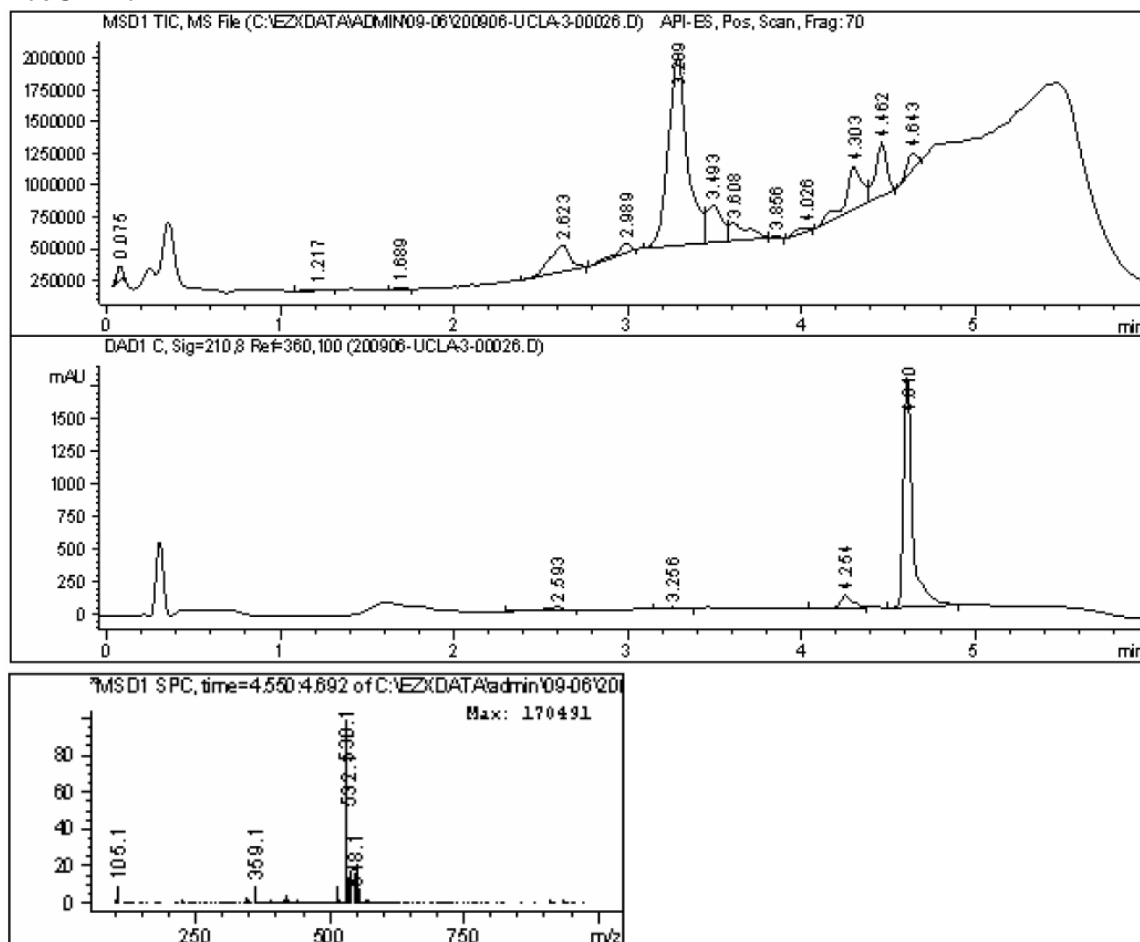

A07C11E01

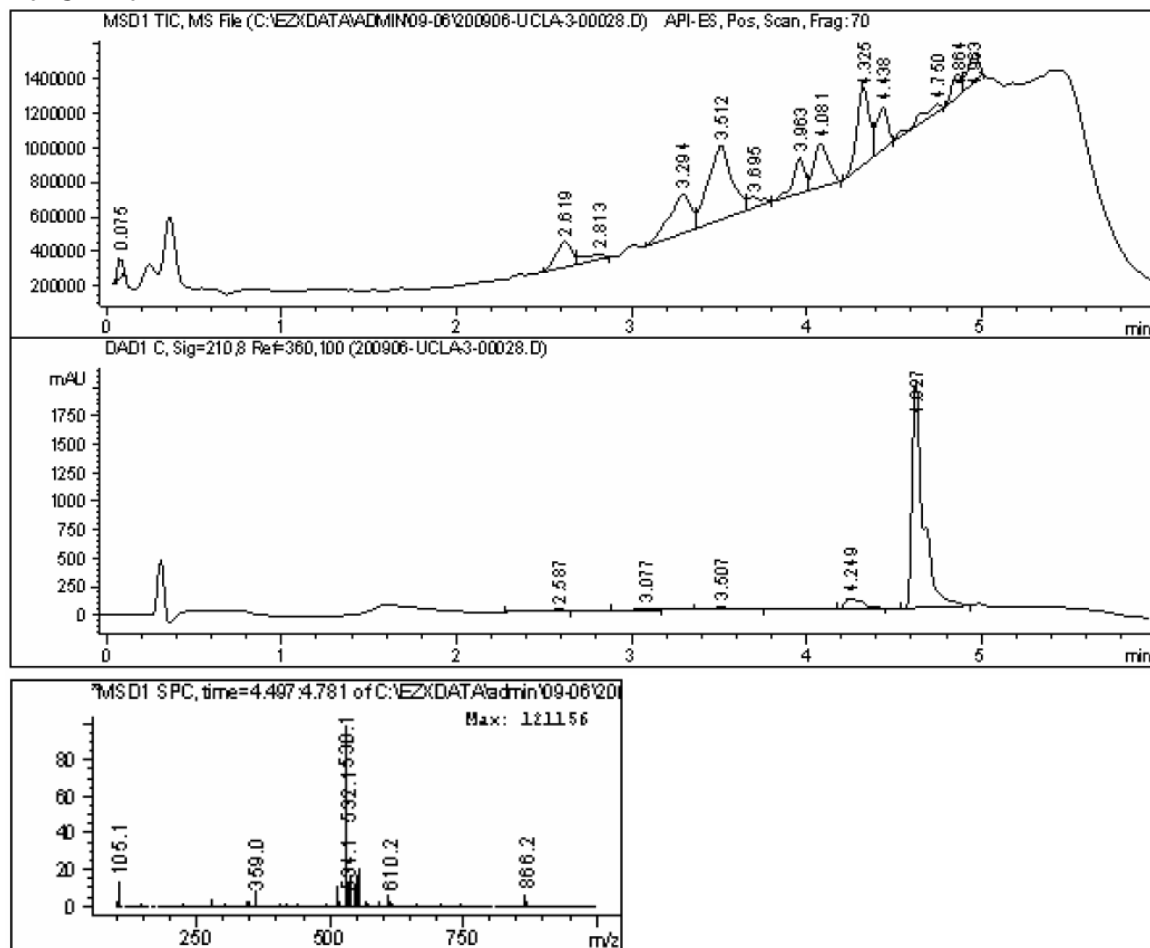

A07C14E01

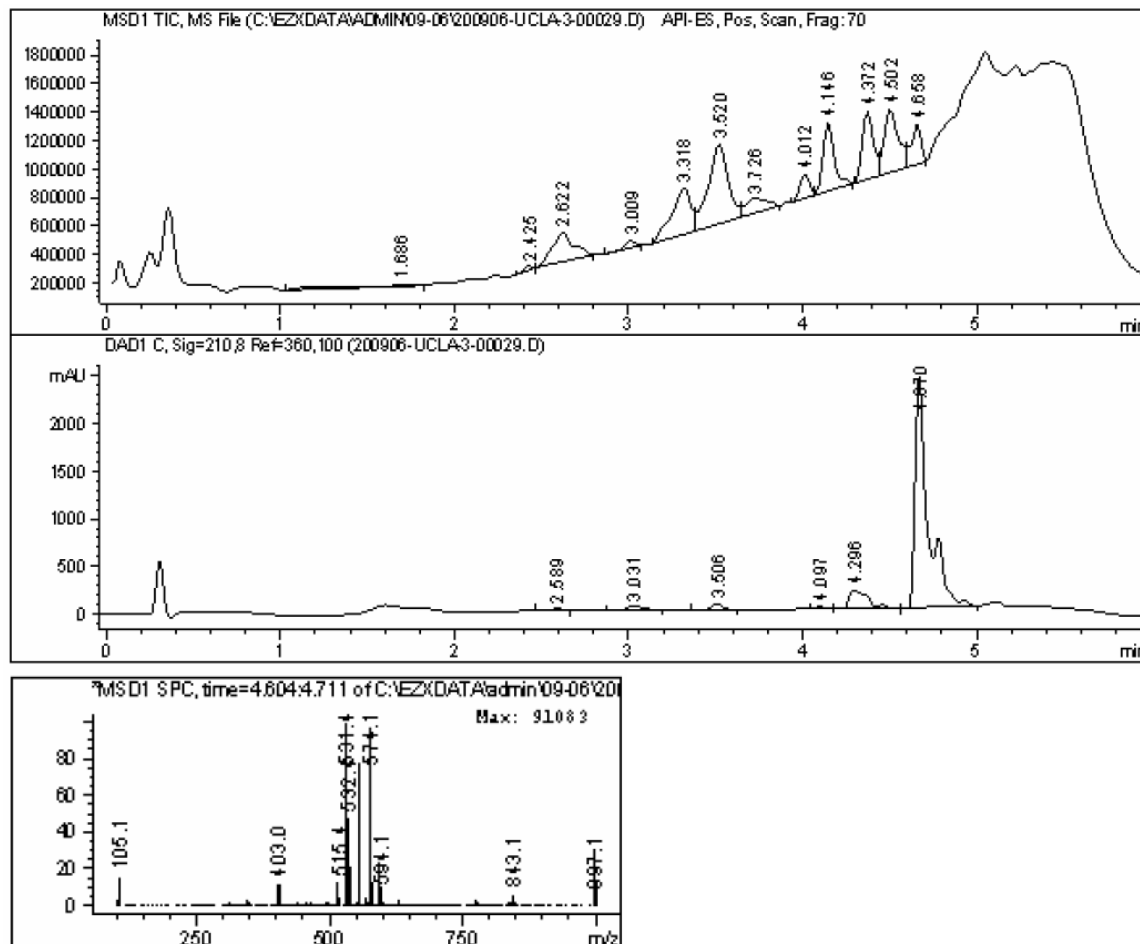

**A08C09E01**

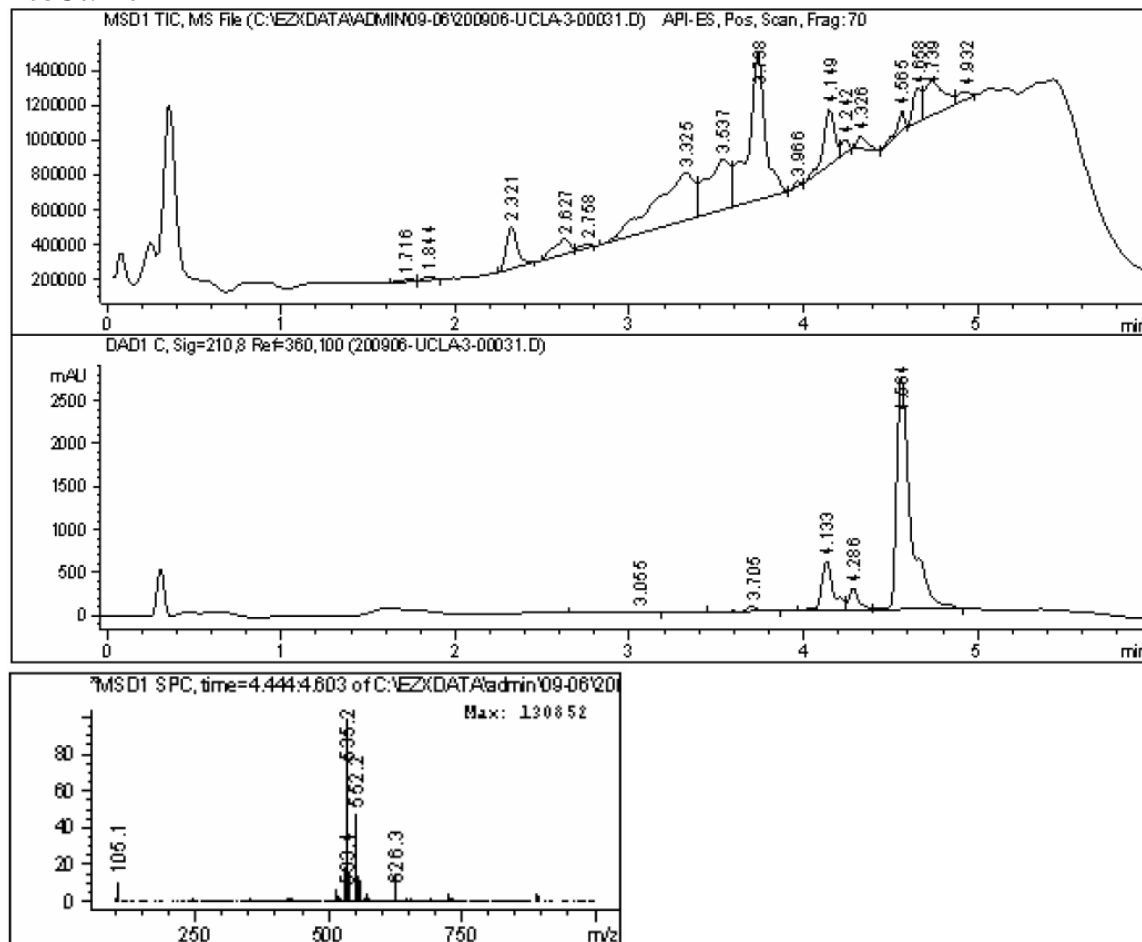

A08C13E01

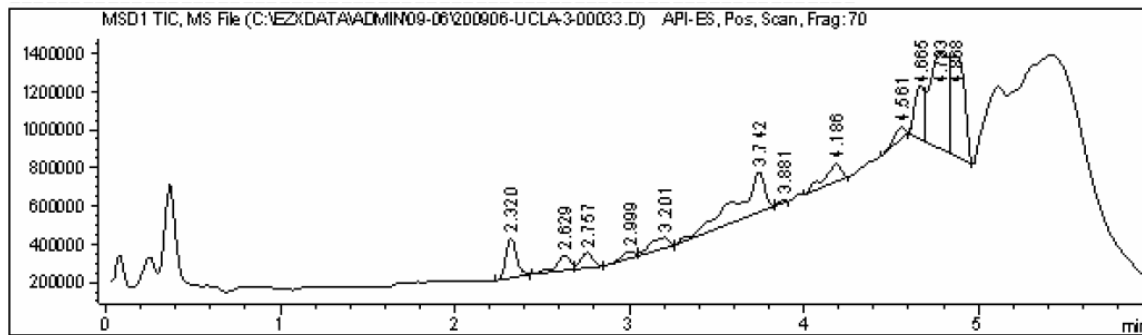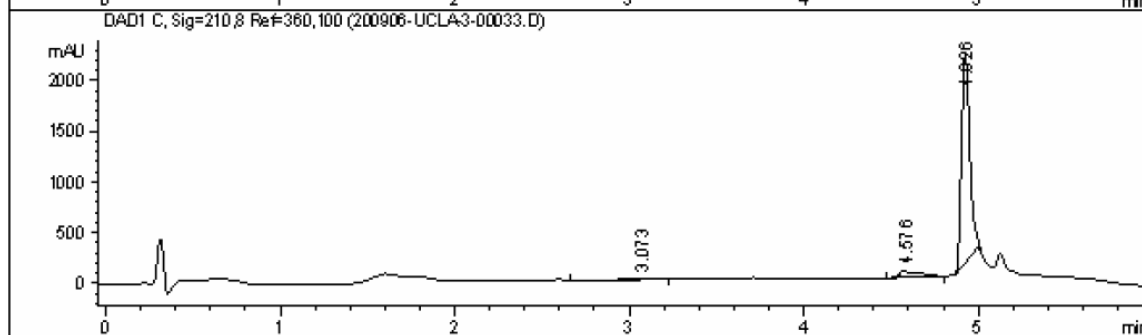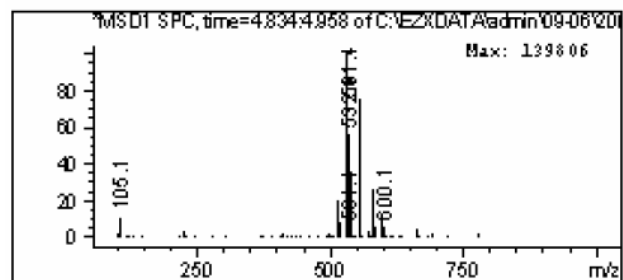

# A09C11E01

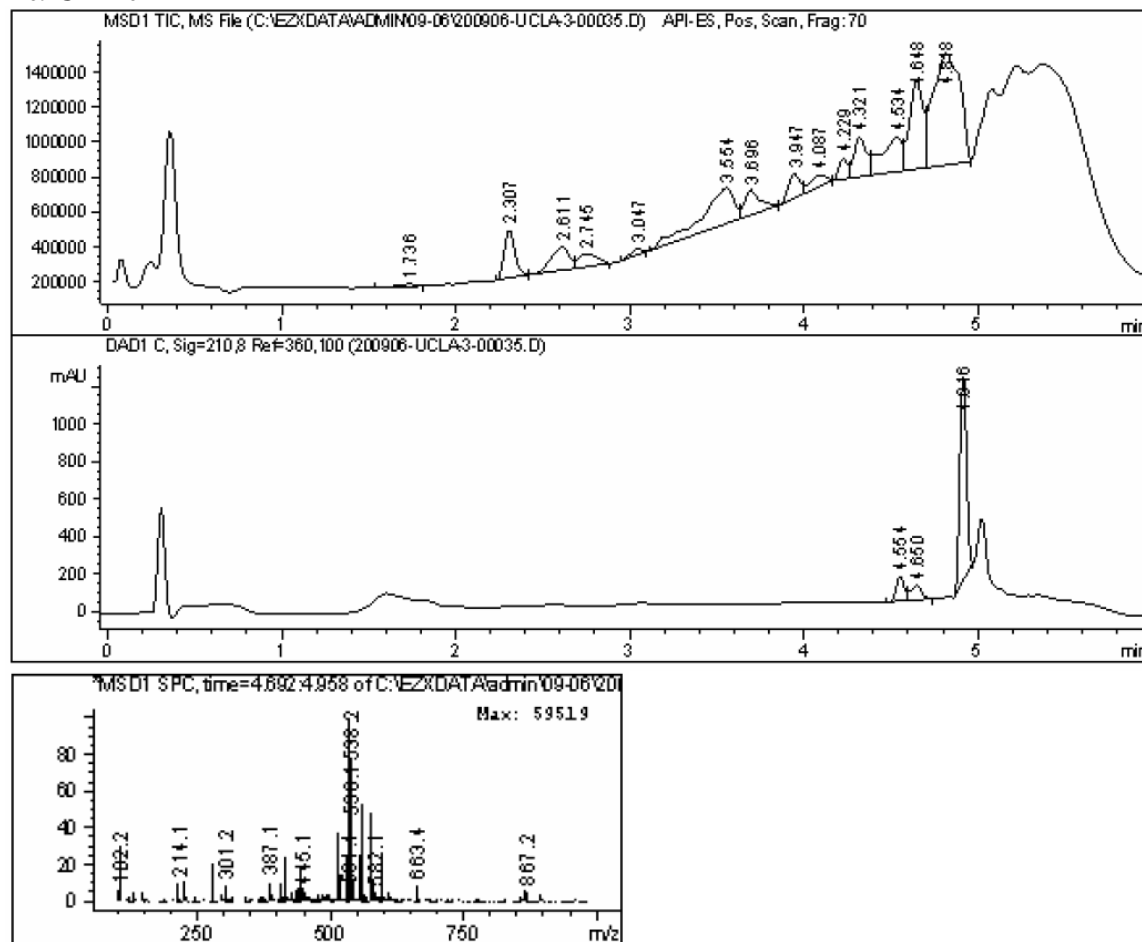

**A05C11E01**

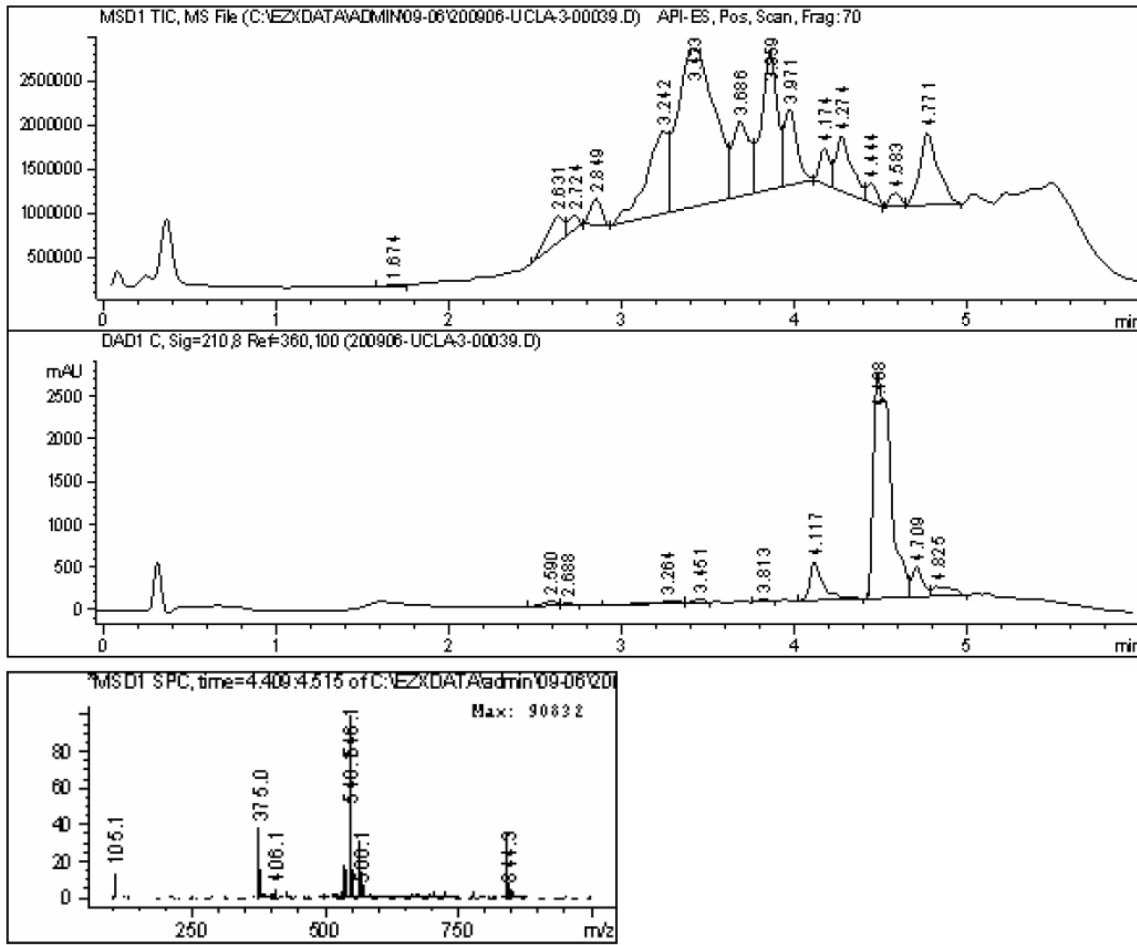

A06C09E04

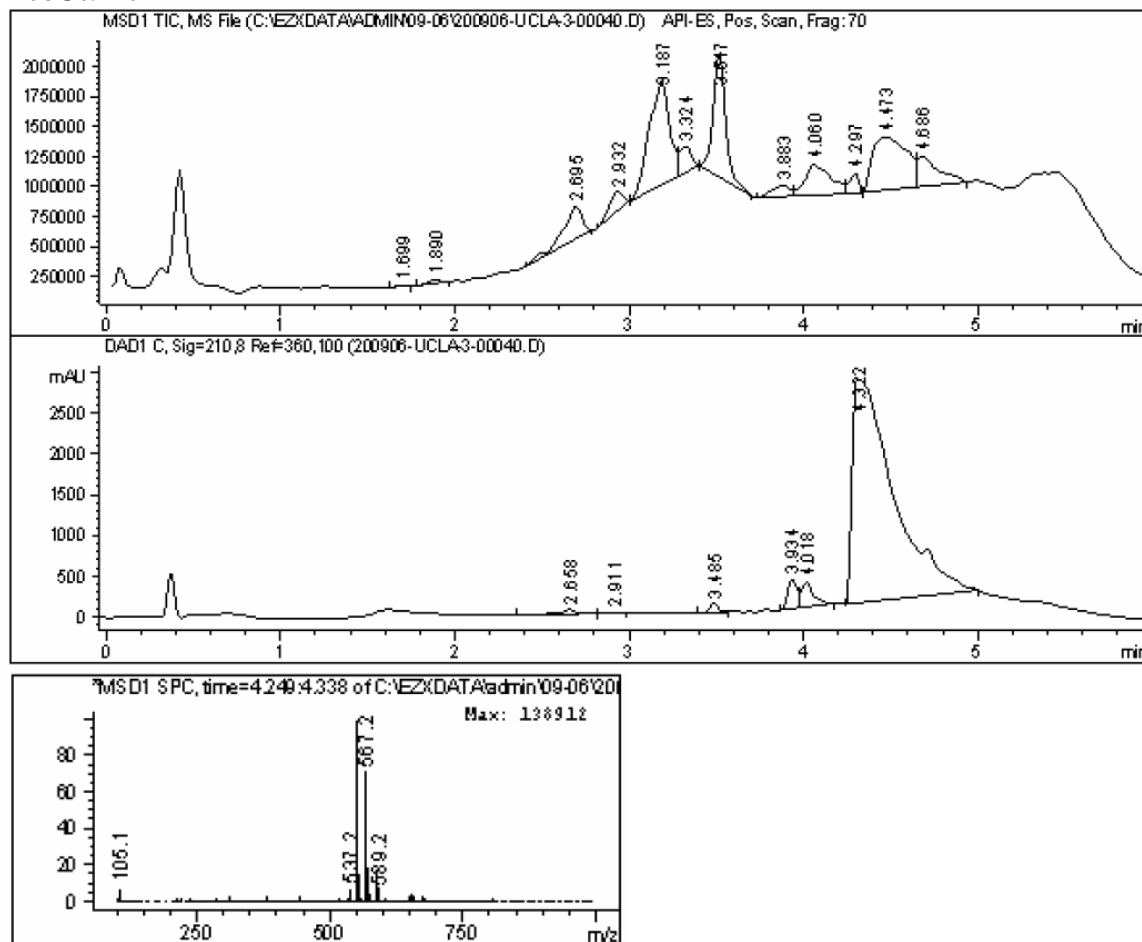



A06C11E04

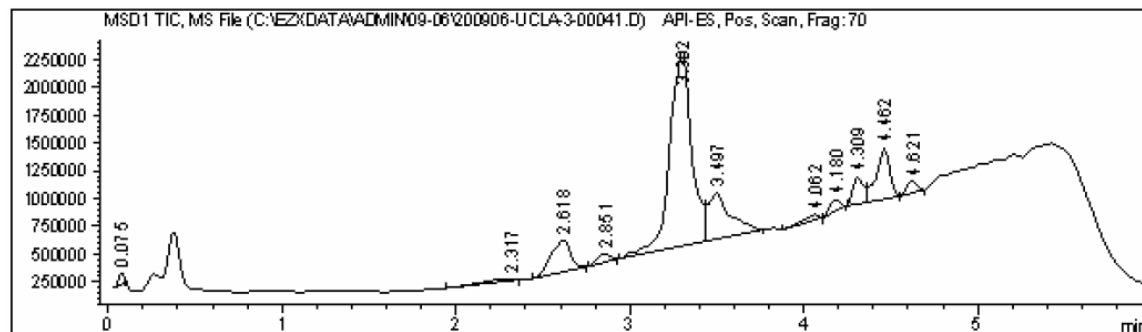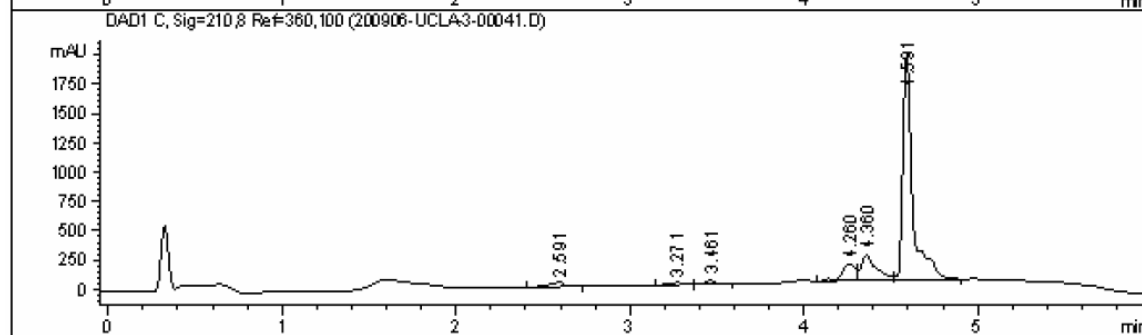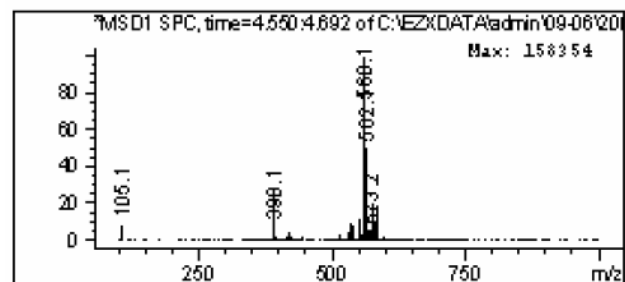

A06C14E04

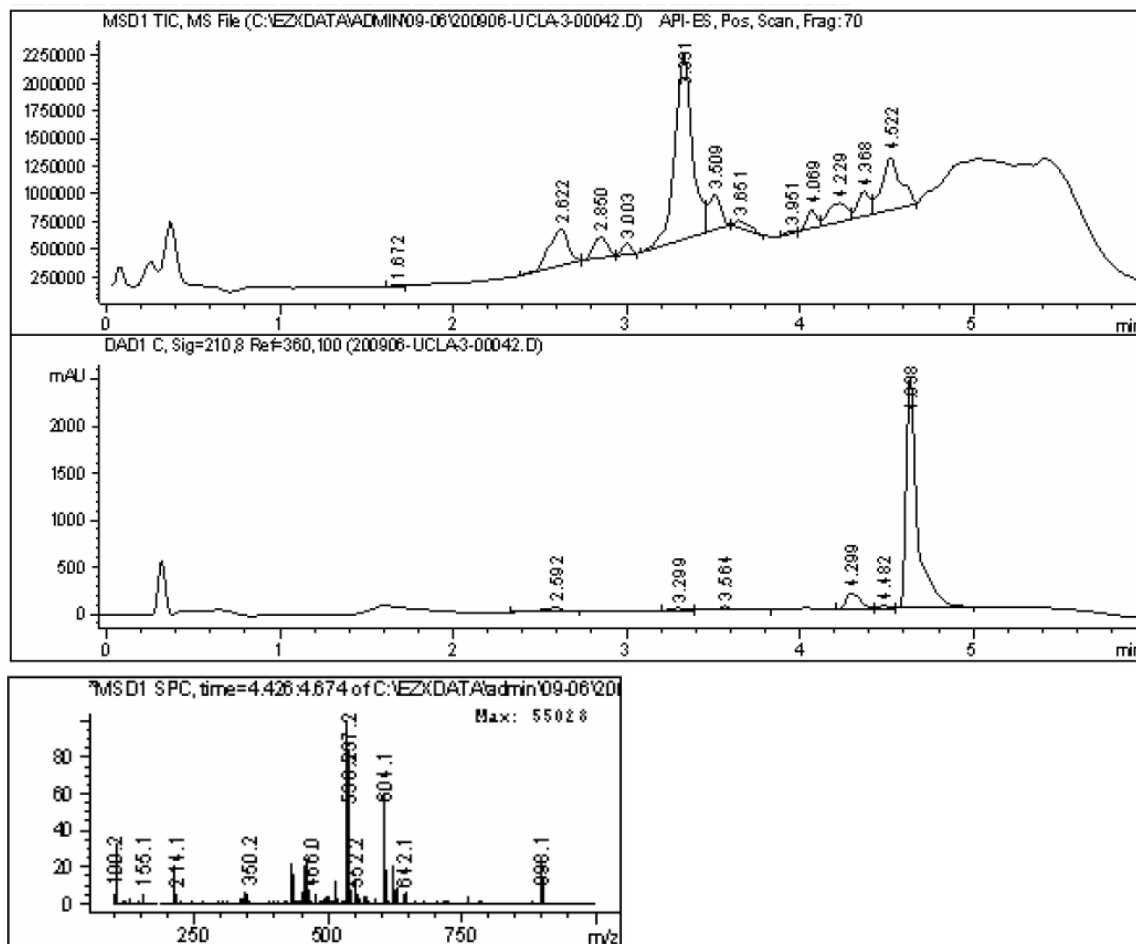

A06C23E04

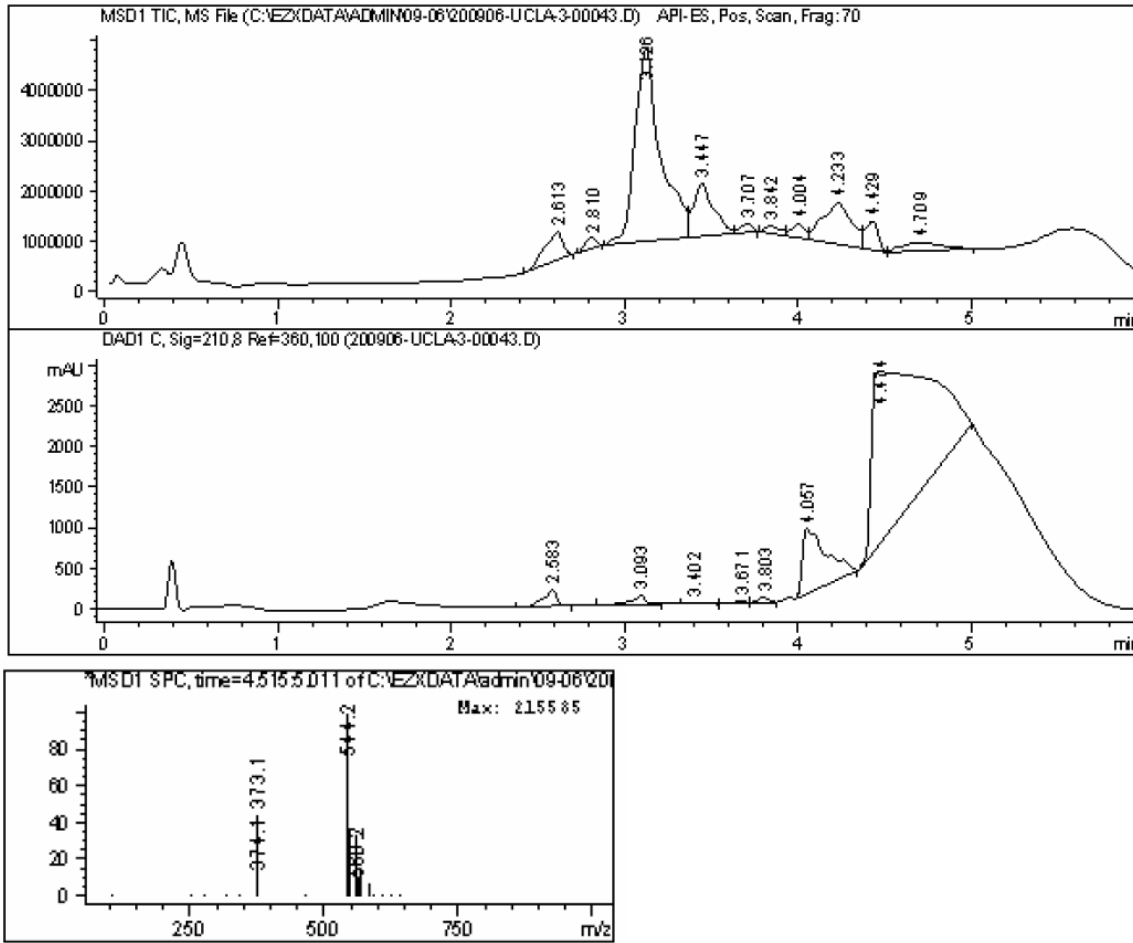

# A05C16E18

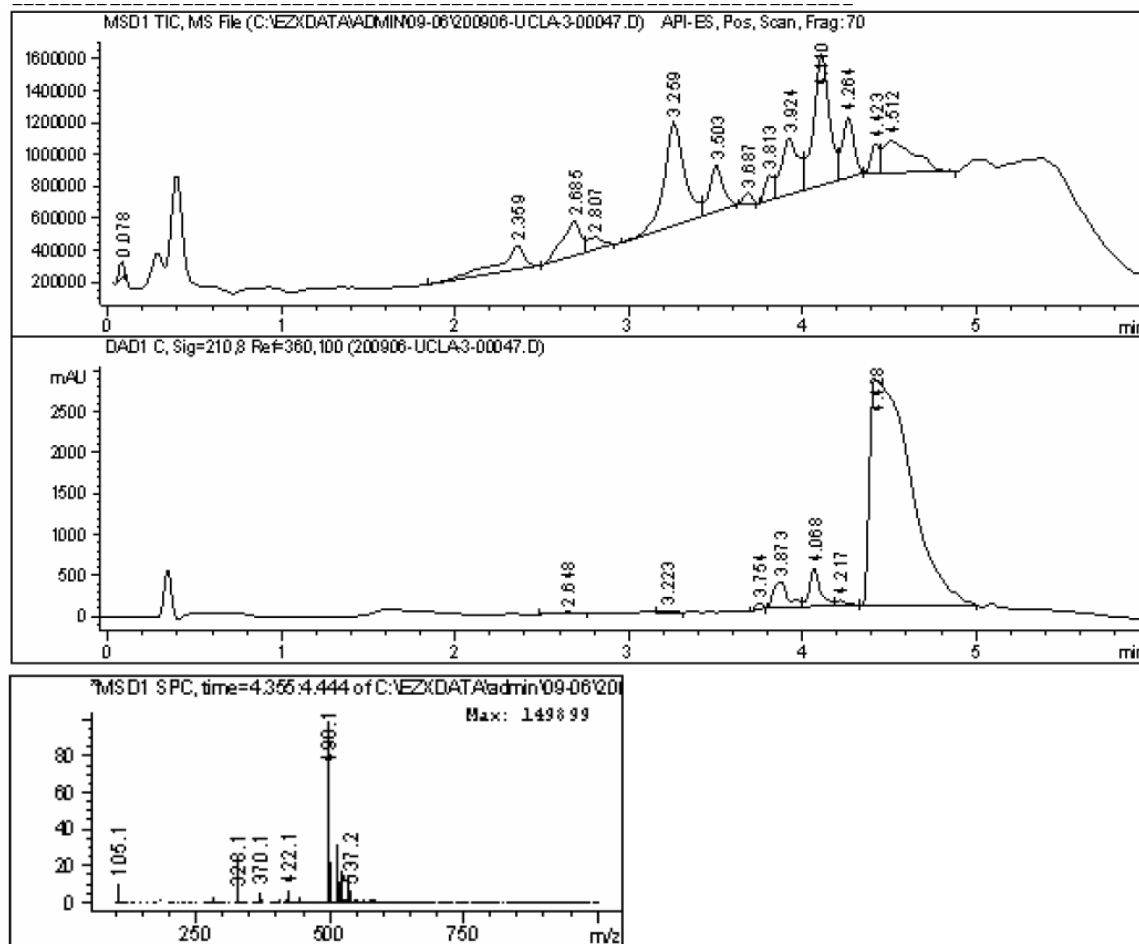

A05C06E01

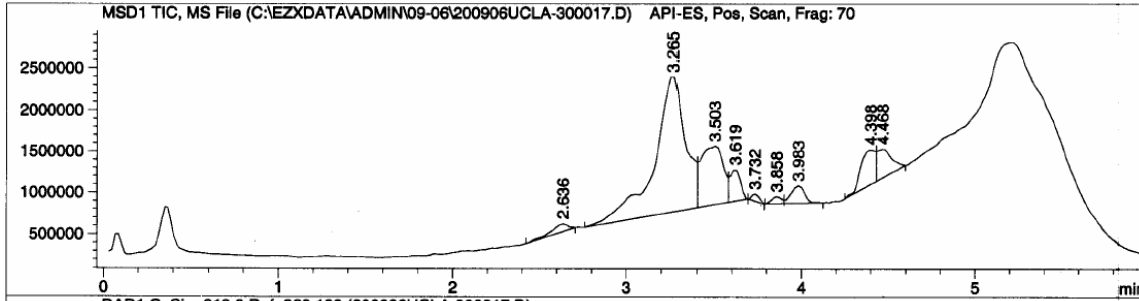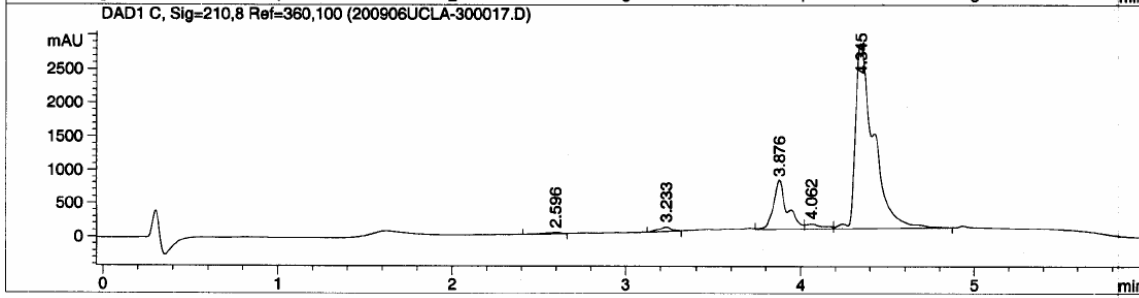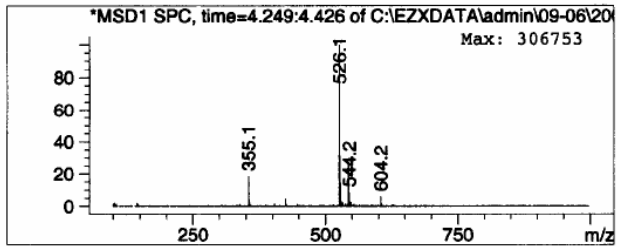

A05C14E02

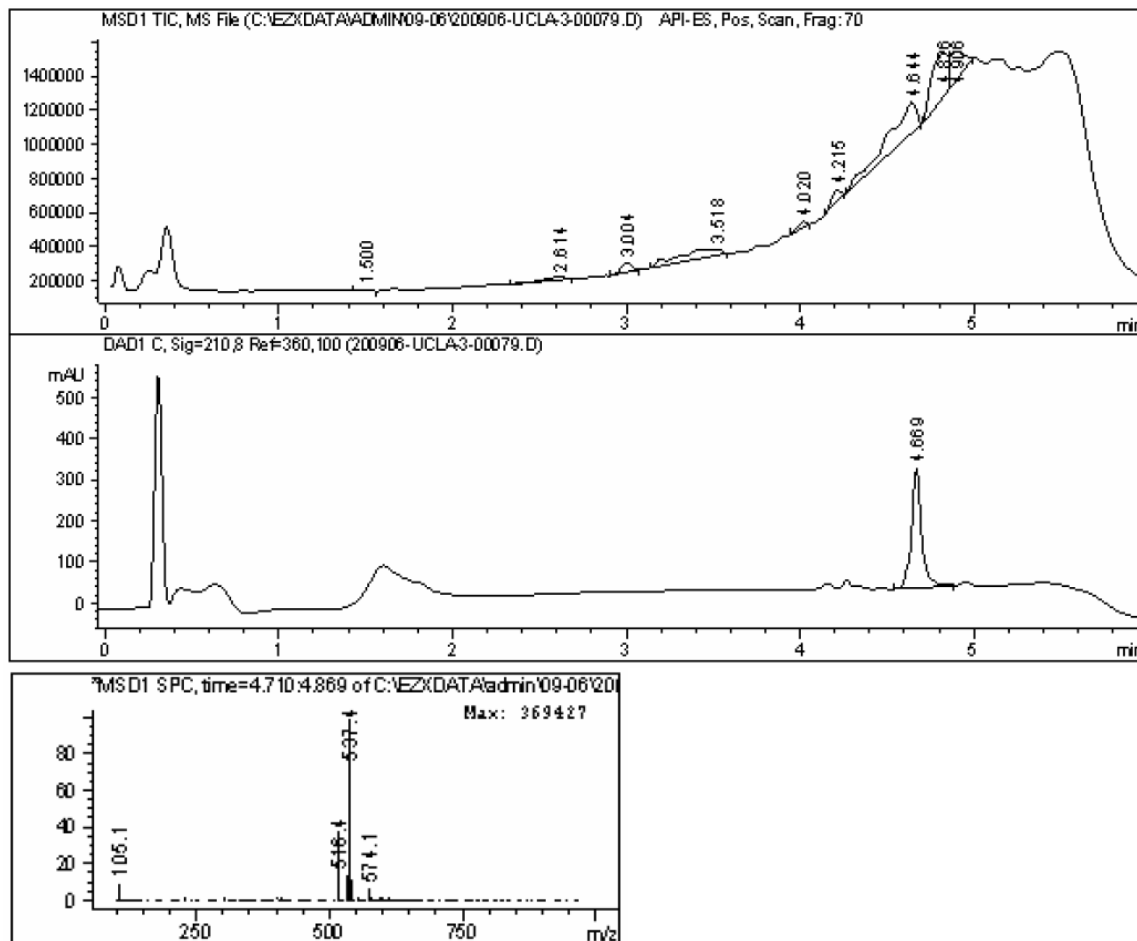

A05C13E02

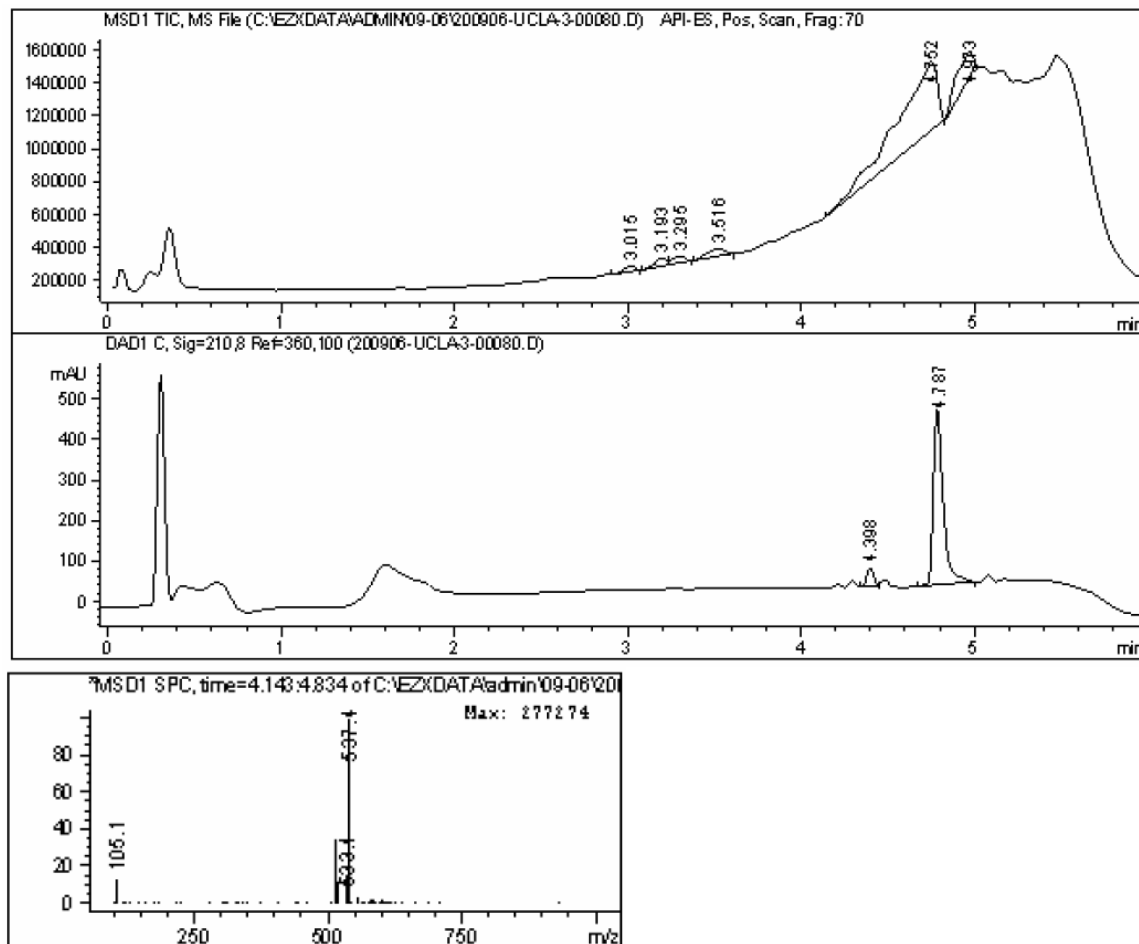

A05C09E01

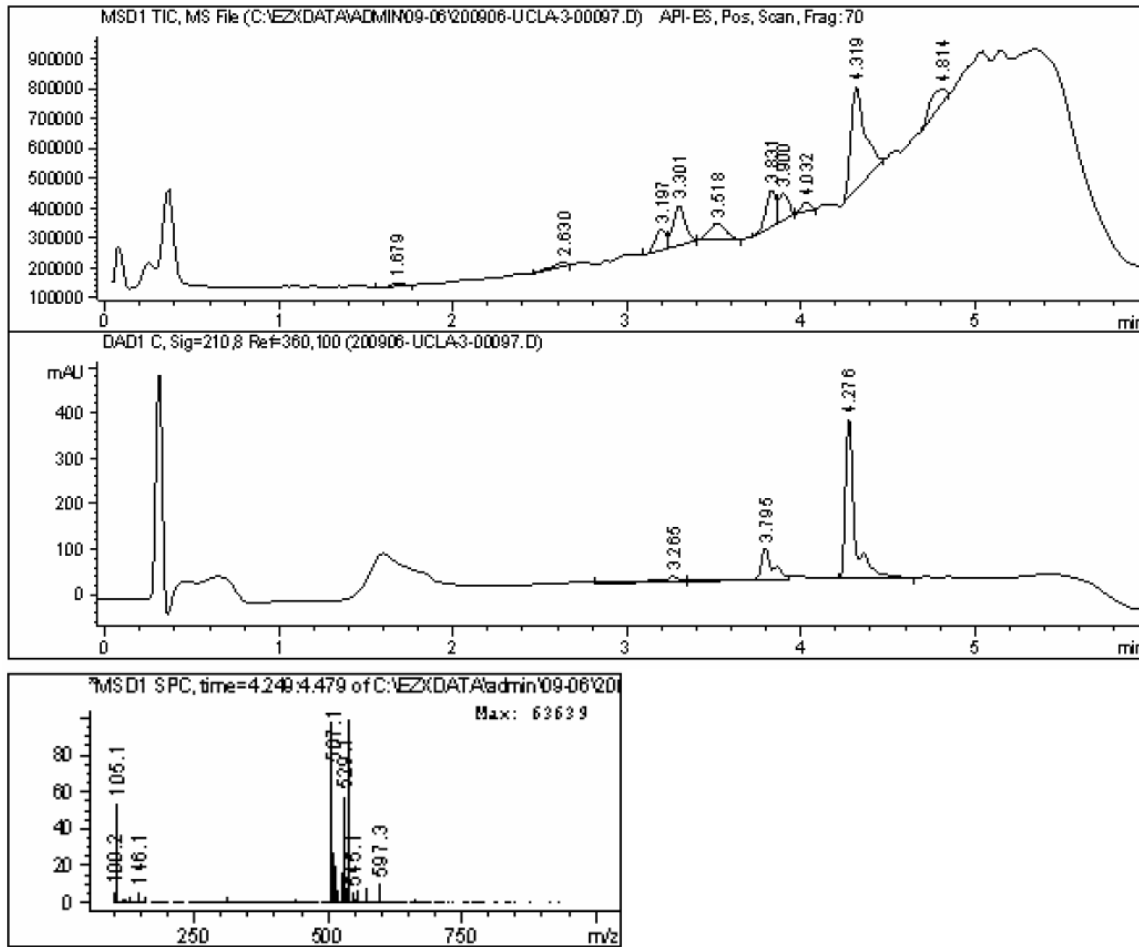



A05C29E01

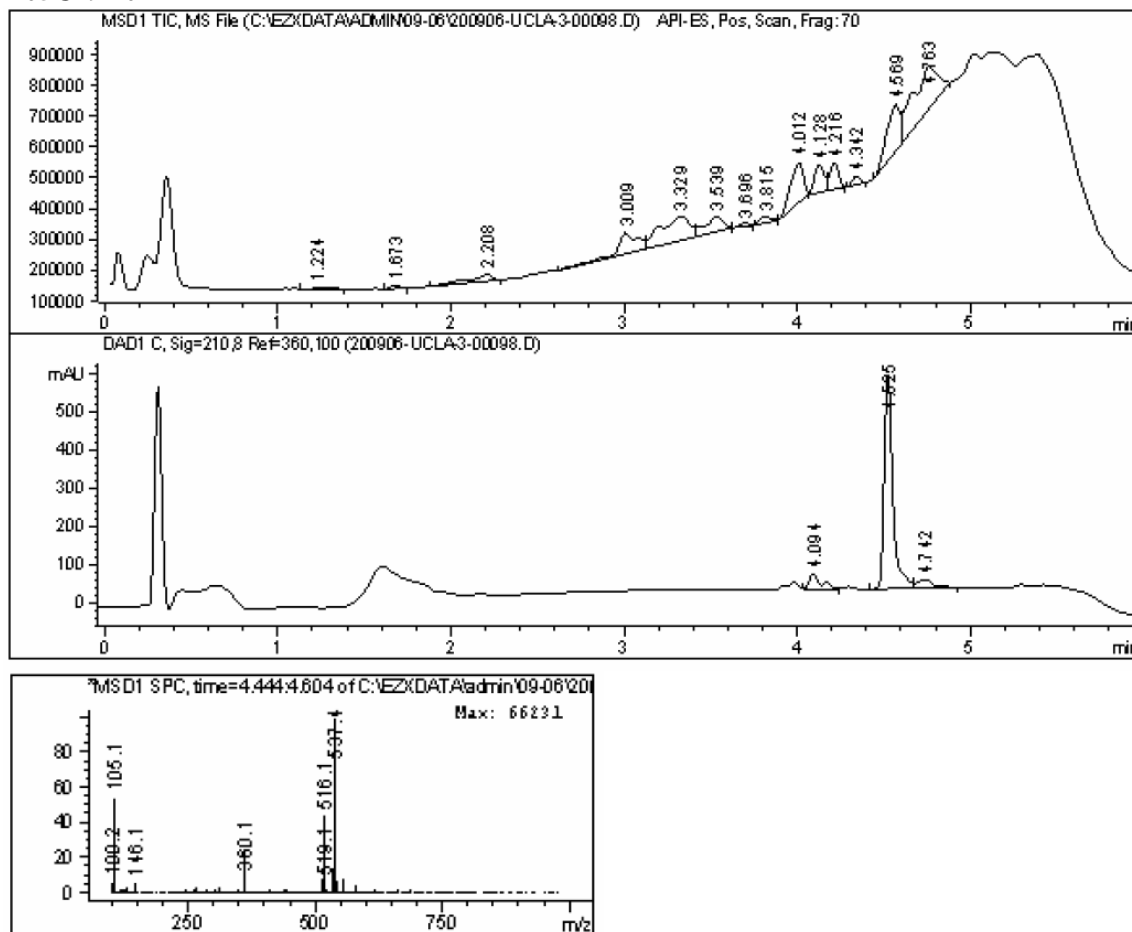

# A09C11E19

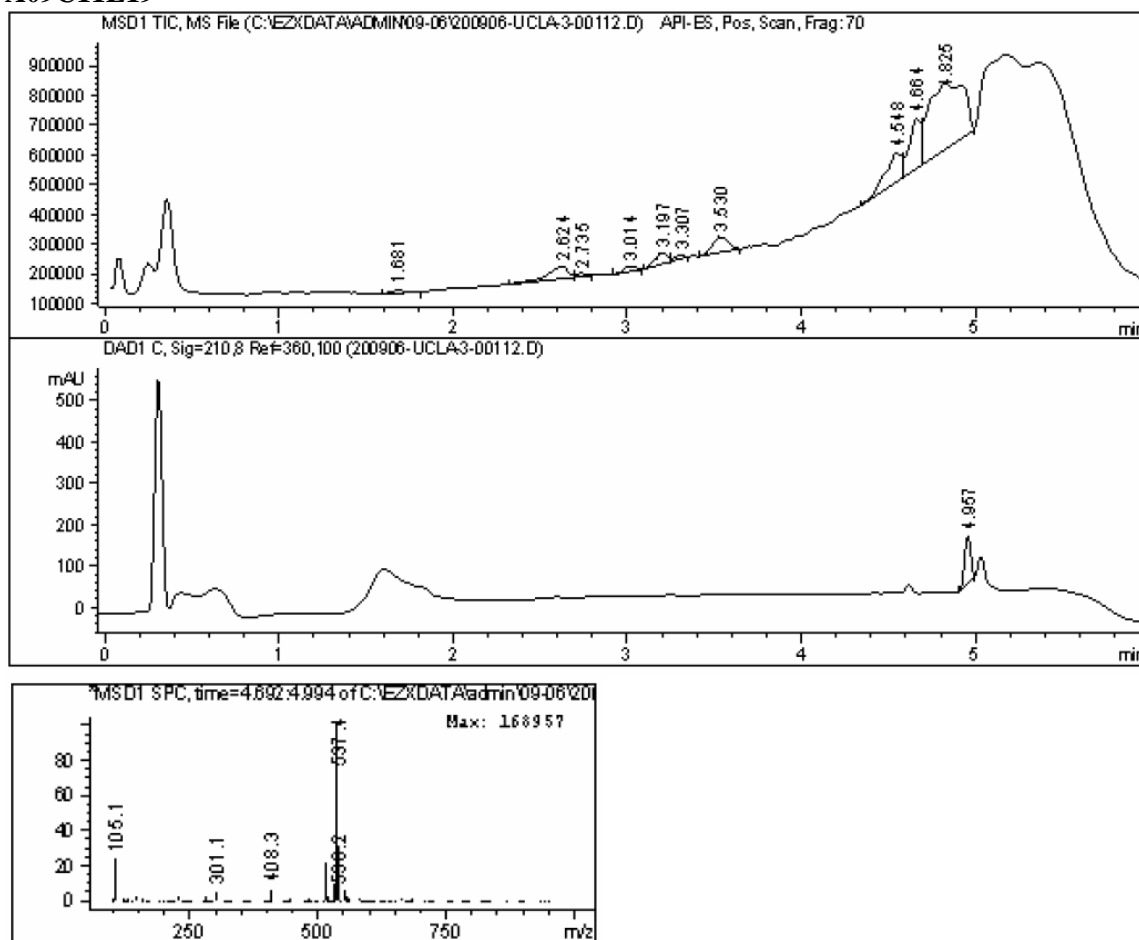

**A08C14E01**

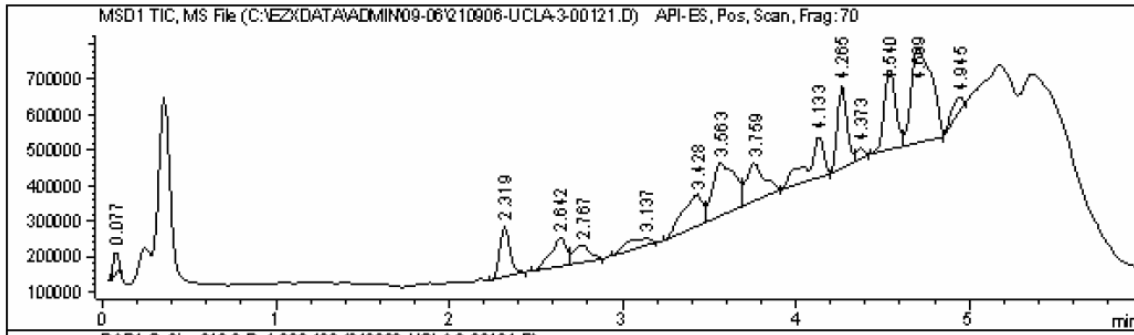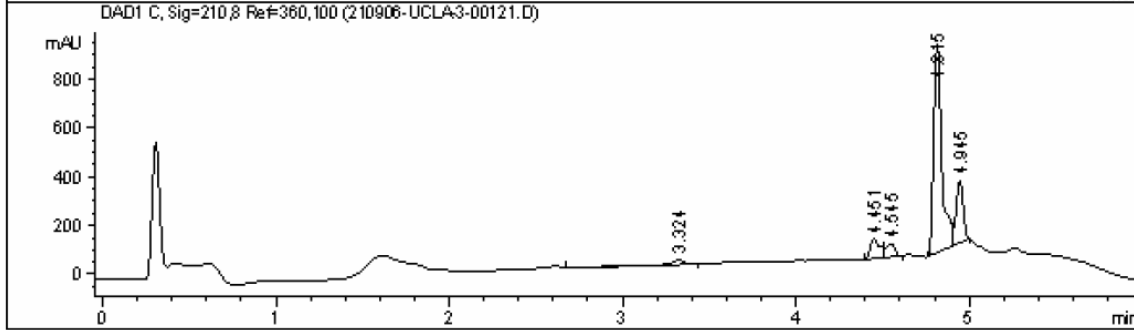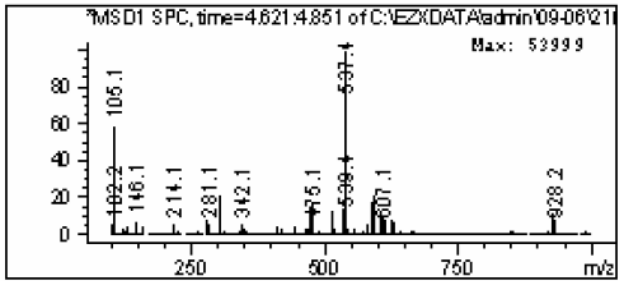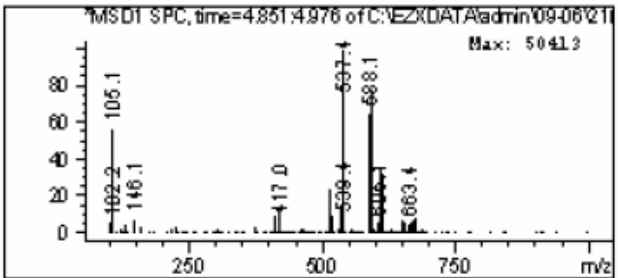

A05C11E04

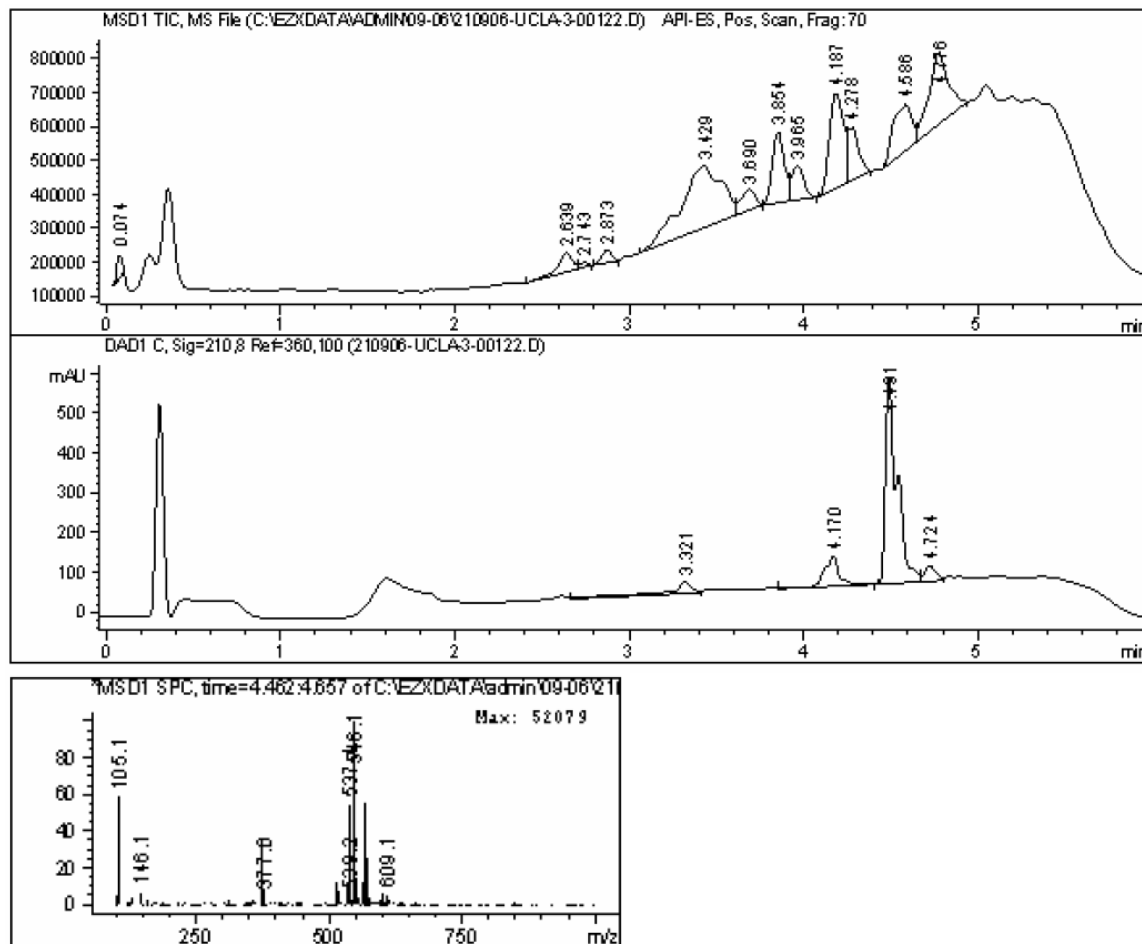

A06C13E01

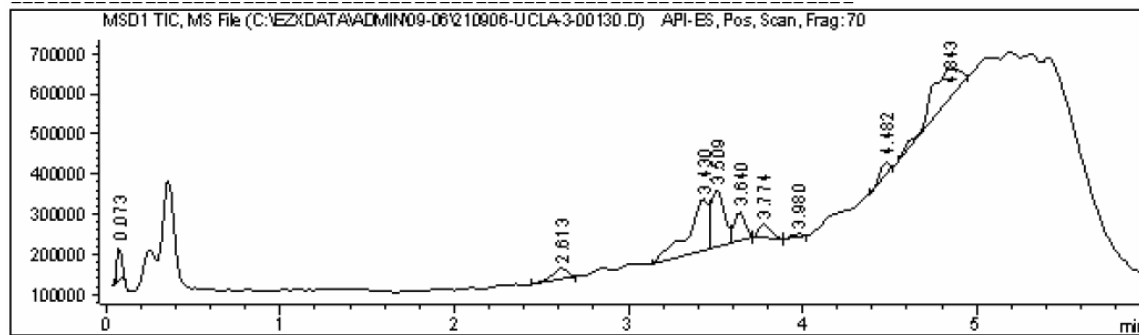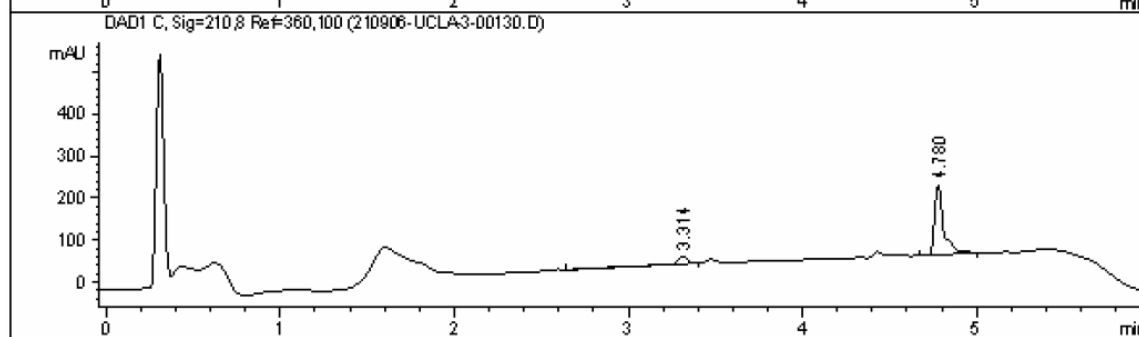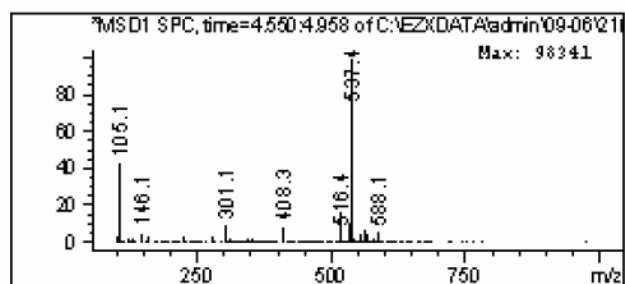

Component 2: Peak at Scan 271.2. Top ions are 564 586 566

**A06C11E18**

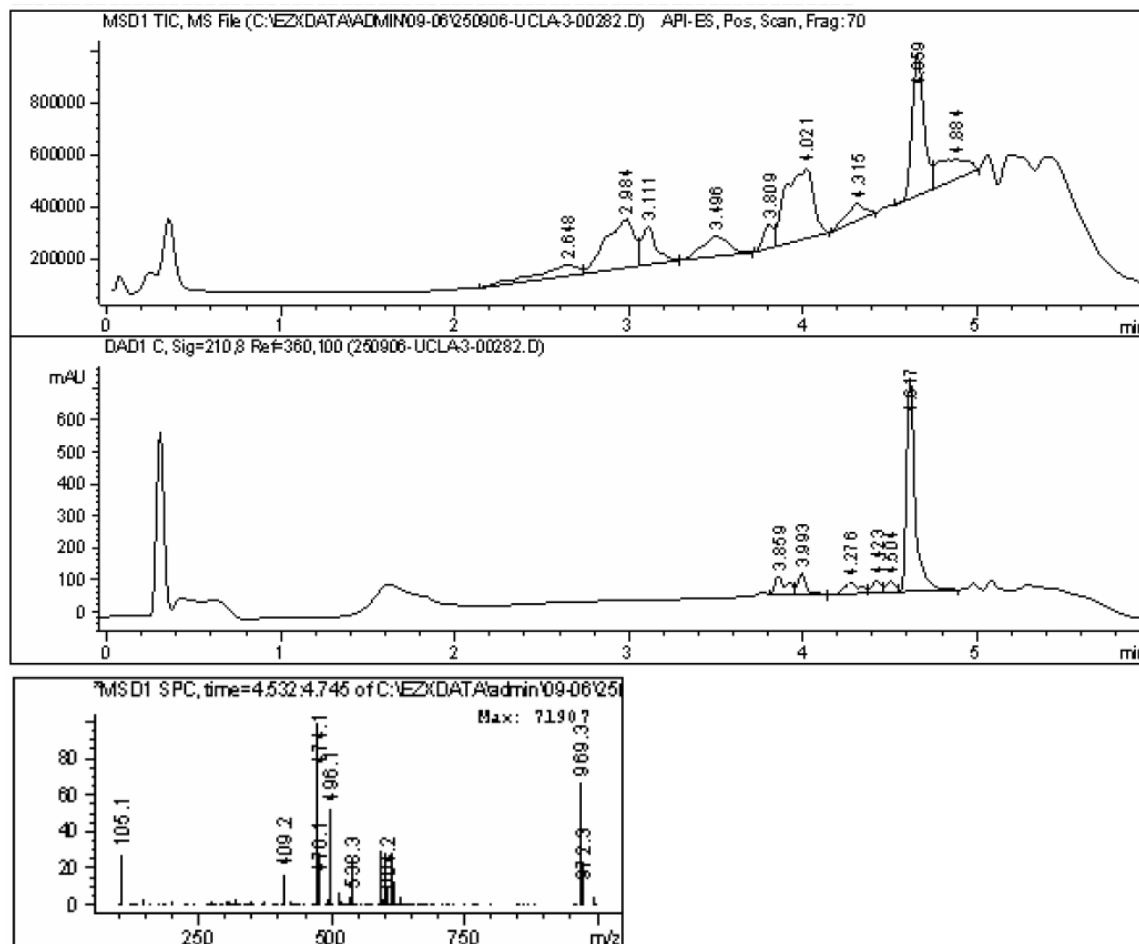

A06C09E28

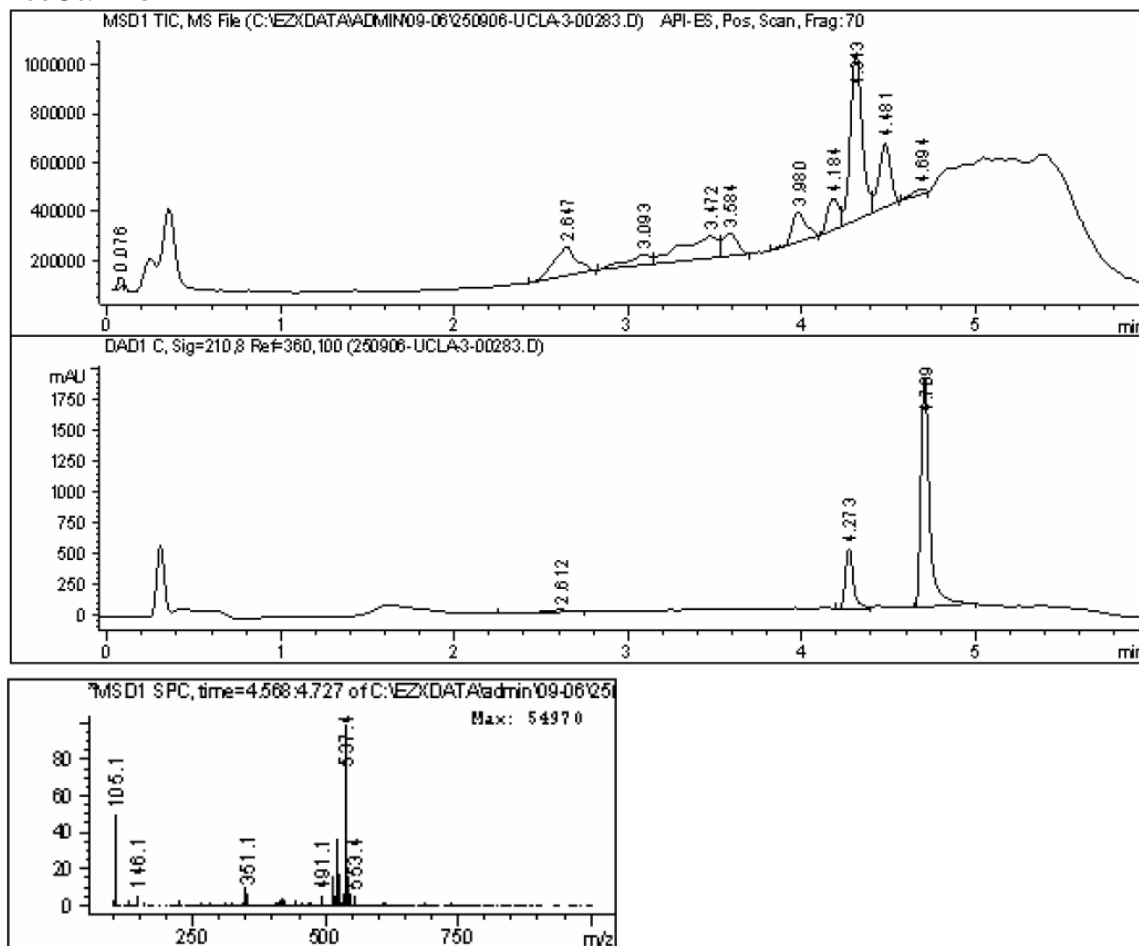

# A07C11E29

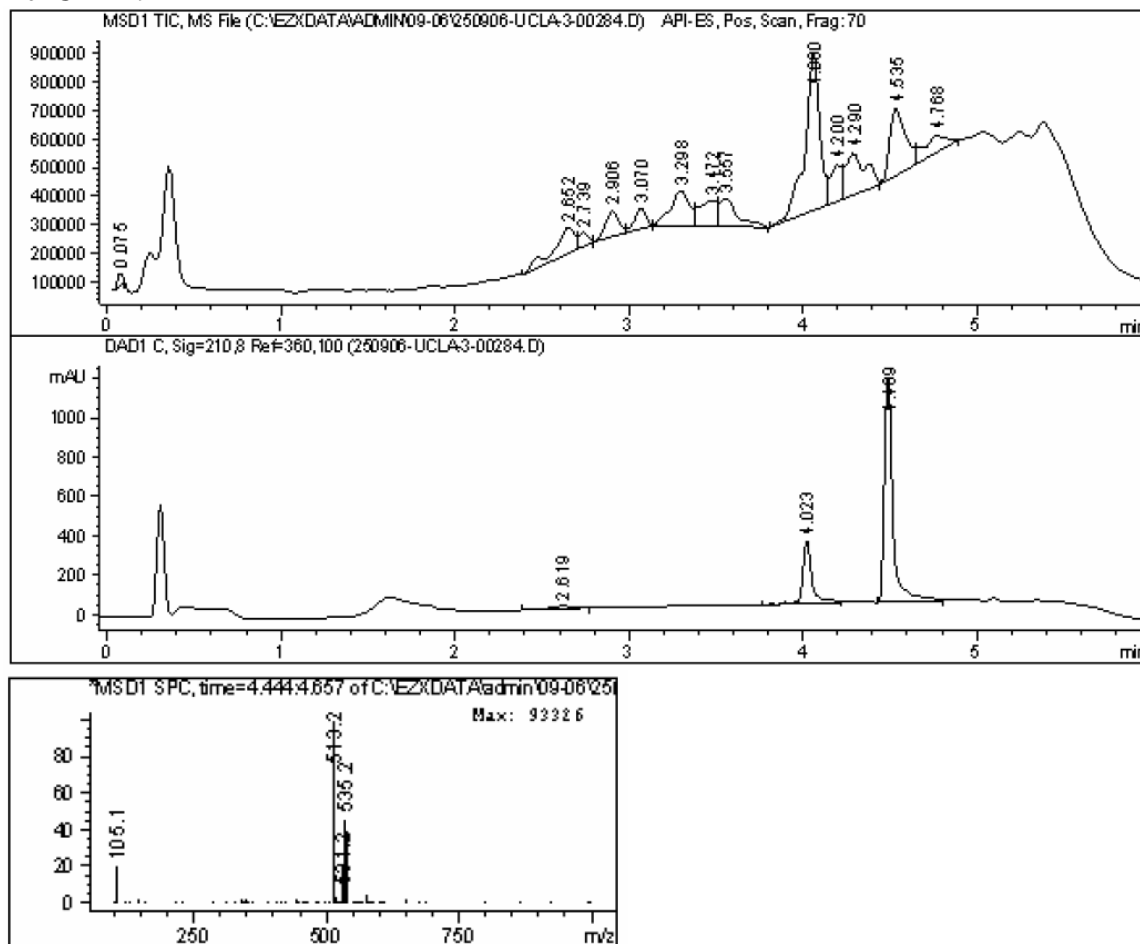



A07C03E28

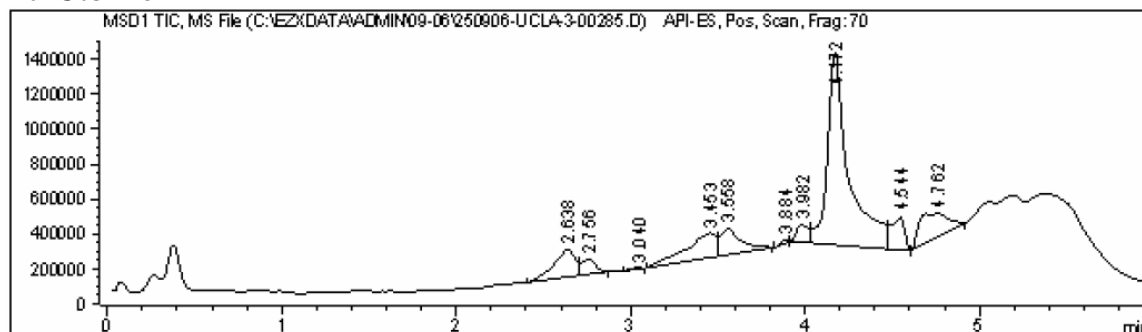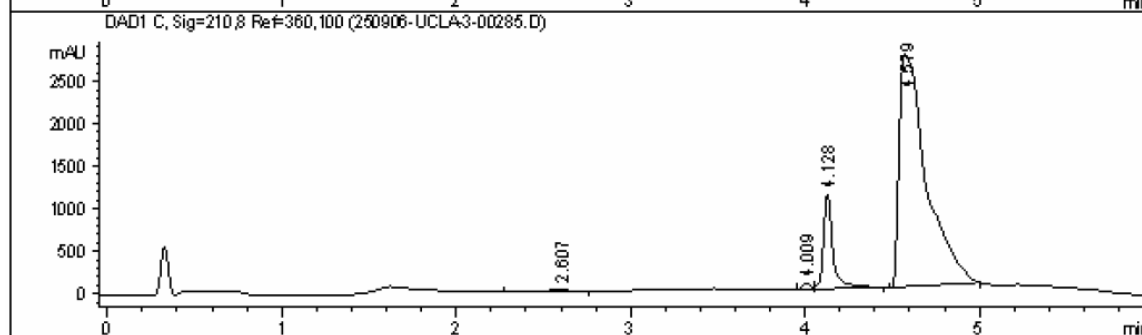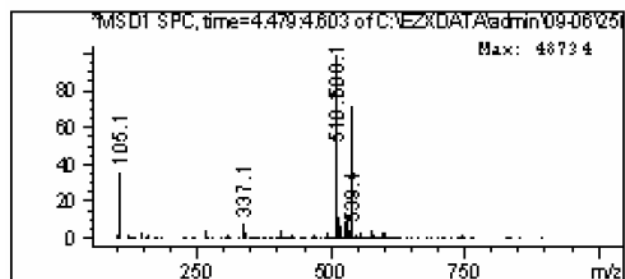

Component 2: Peak at Scan 254.2. Top ions are 516

**A05C23E29**

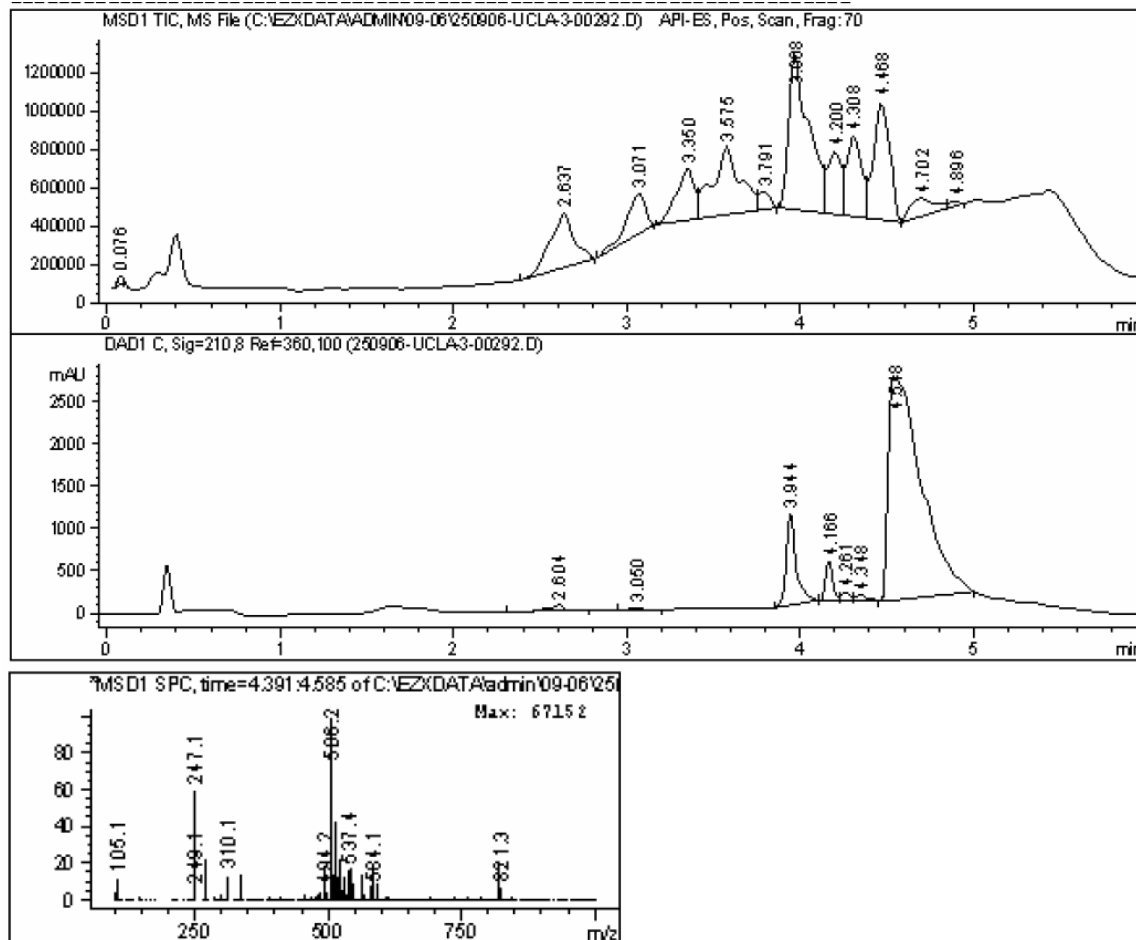

A06C09E29

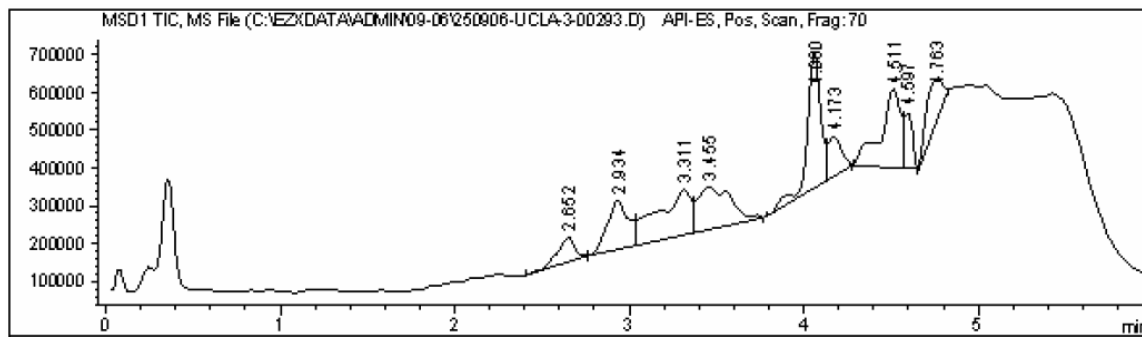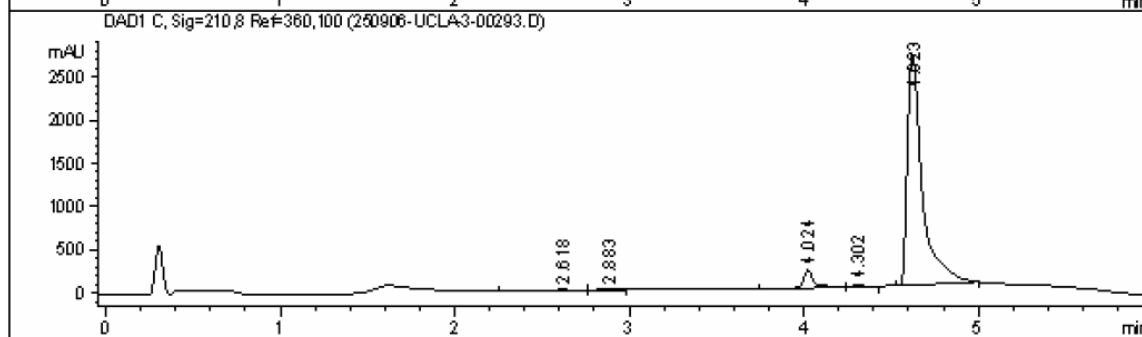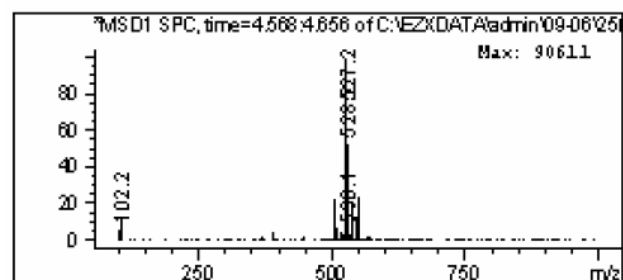

A06C11E32

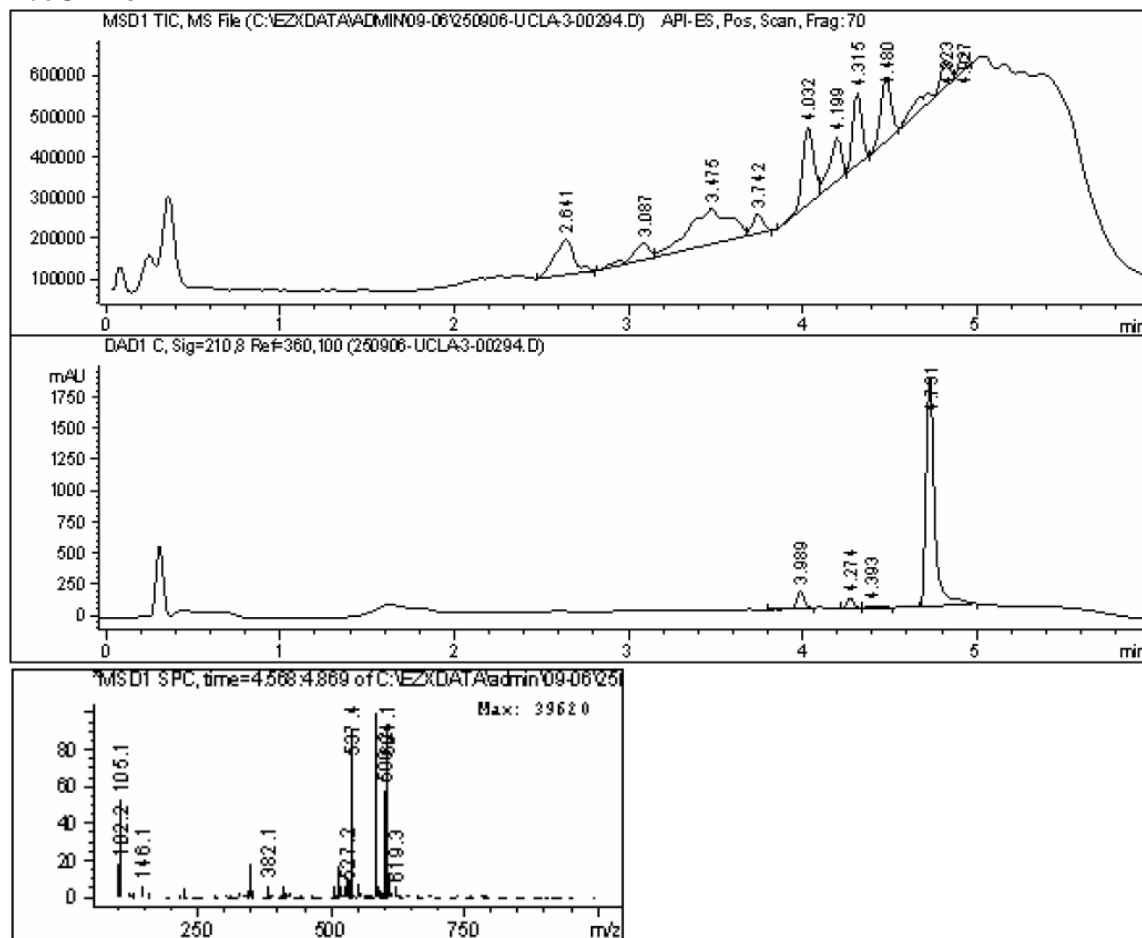

A06C14E32

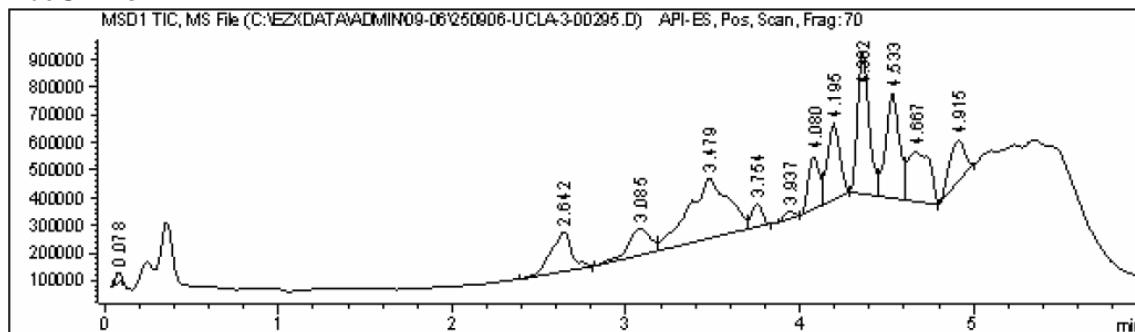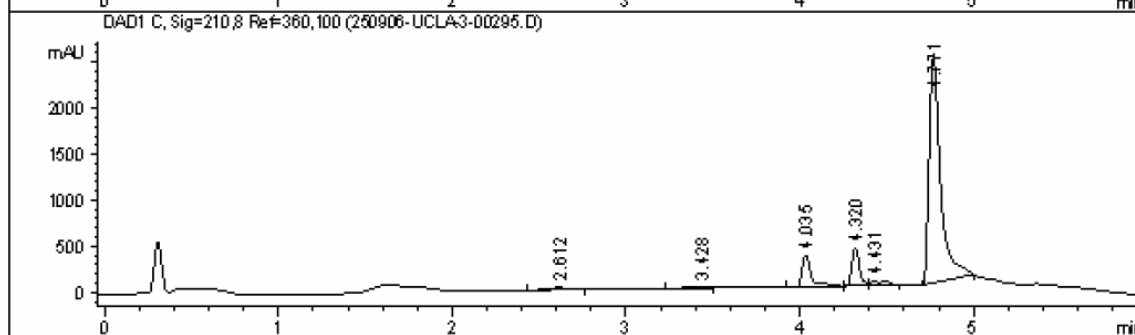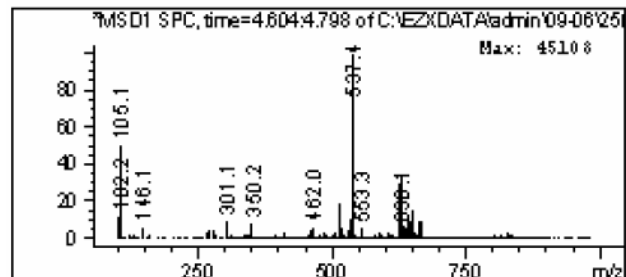

Component 4: Peak at Scan 269.5. Top ions are 648

# A06C16E16

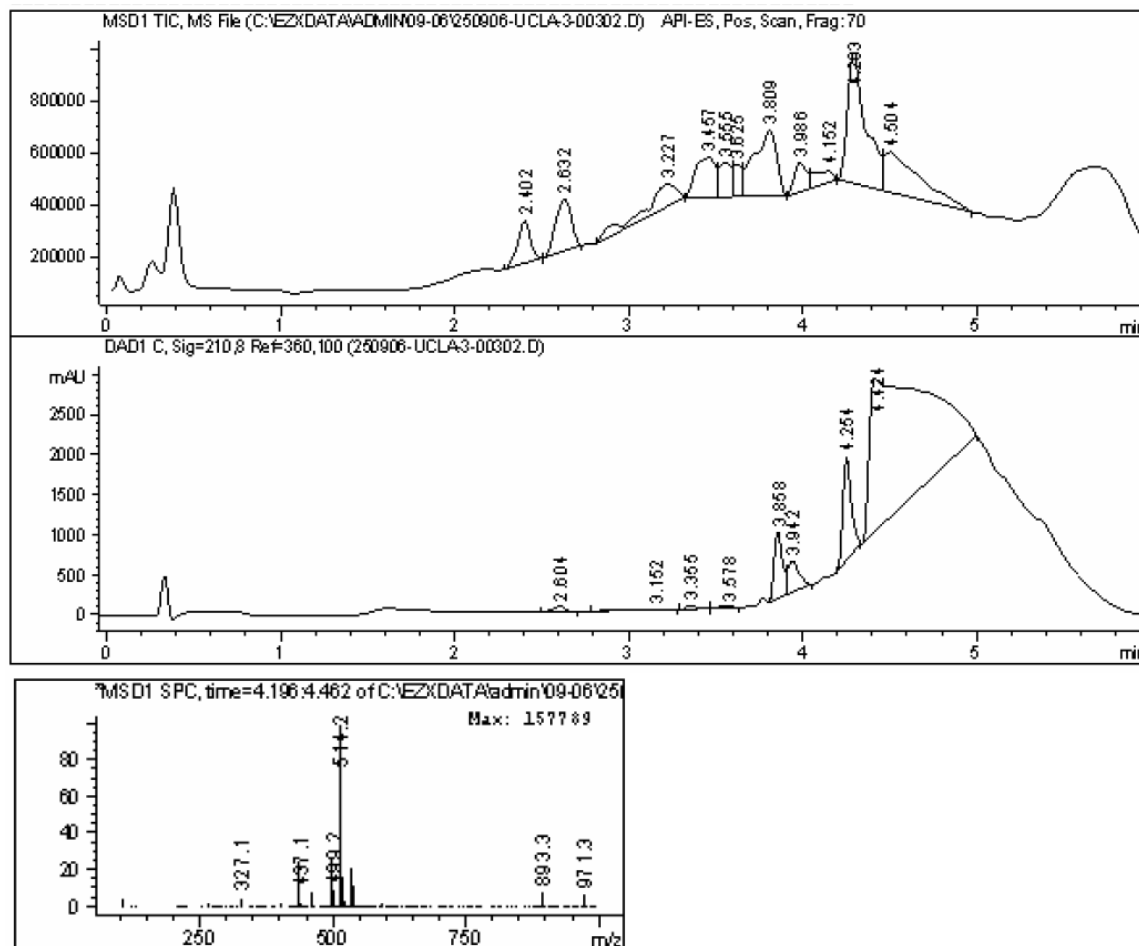

A05C14E16

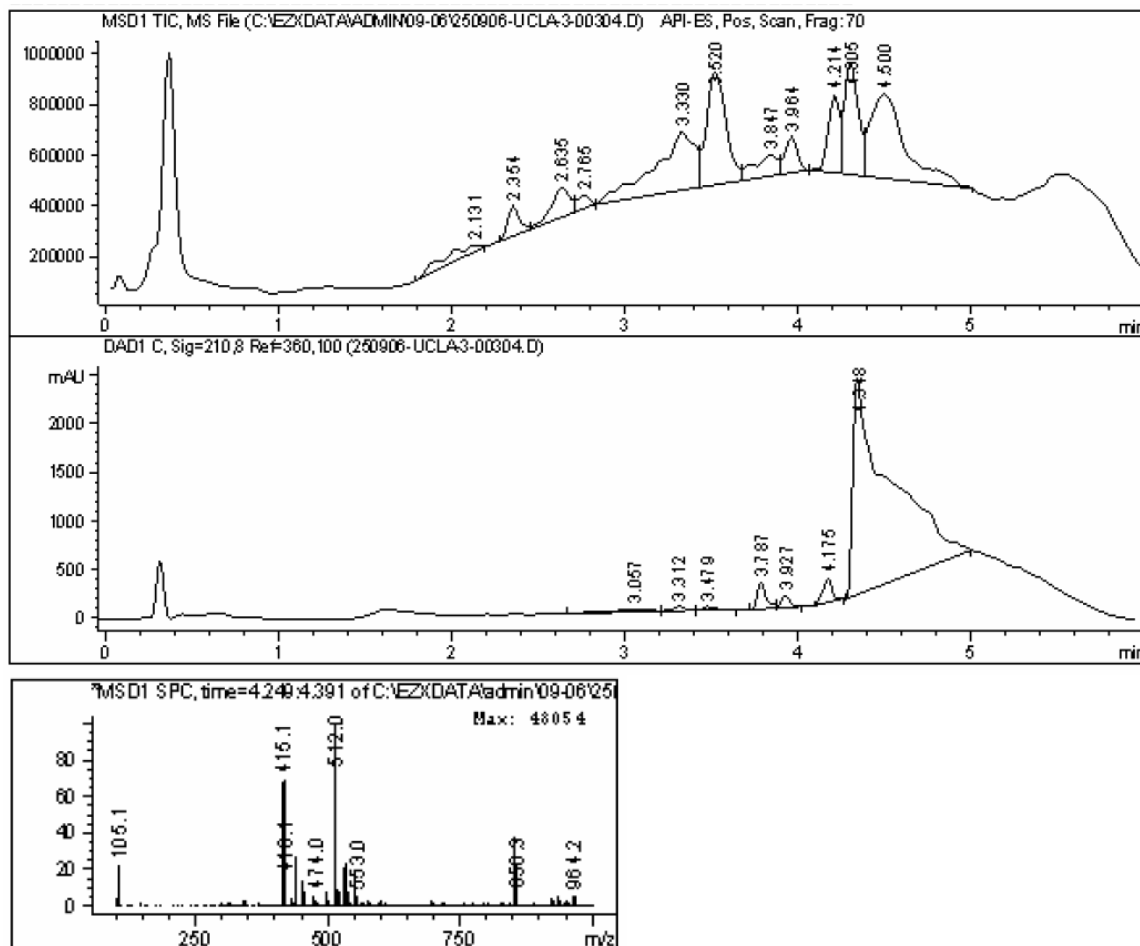

A05C04E16

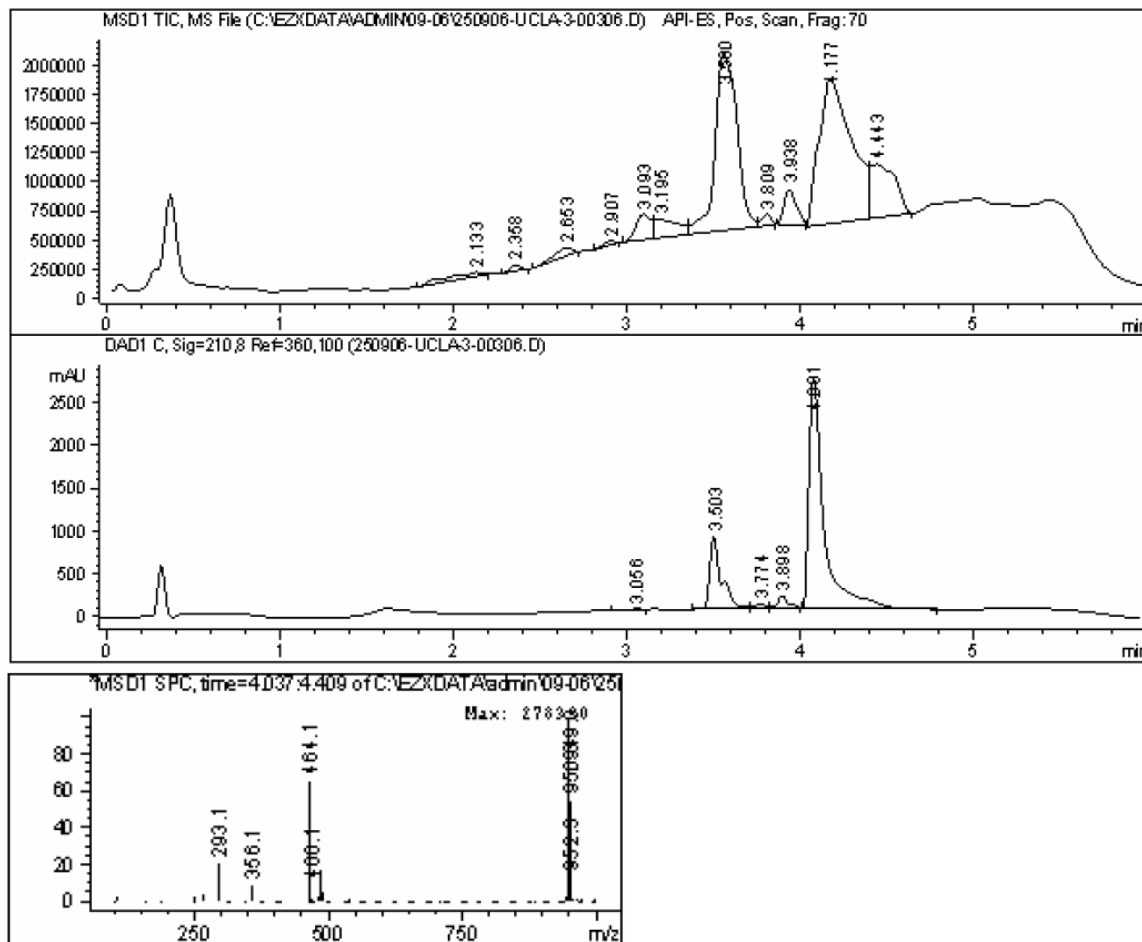



A06C09E17

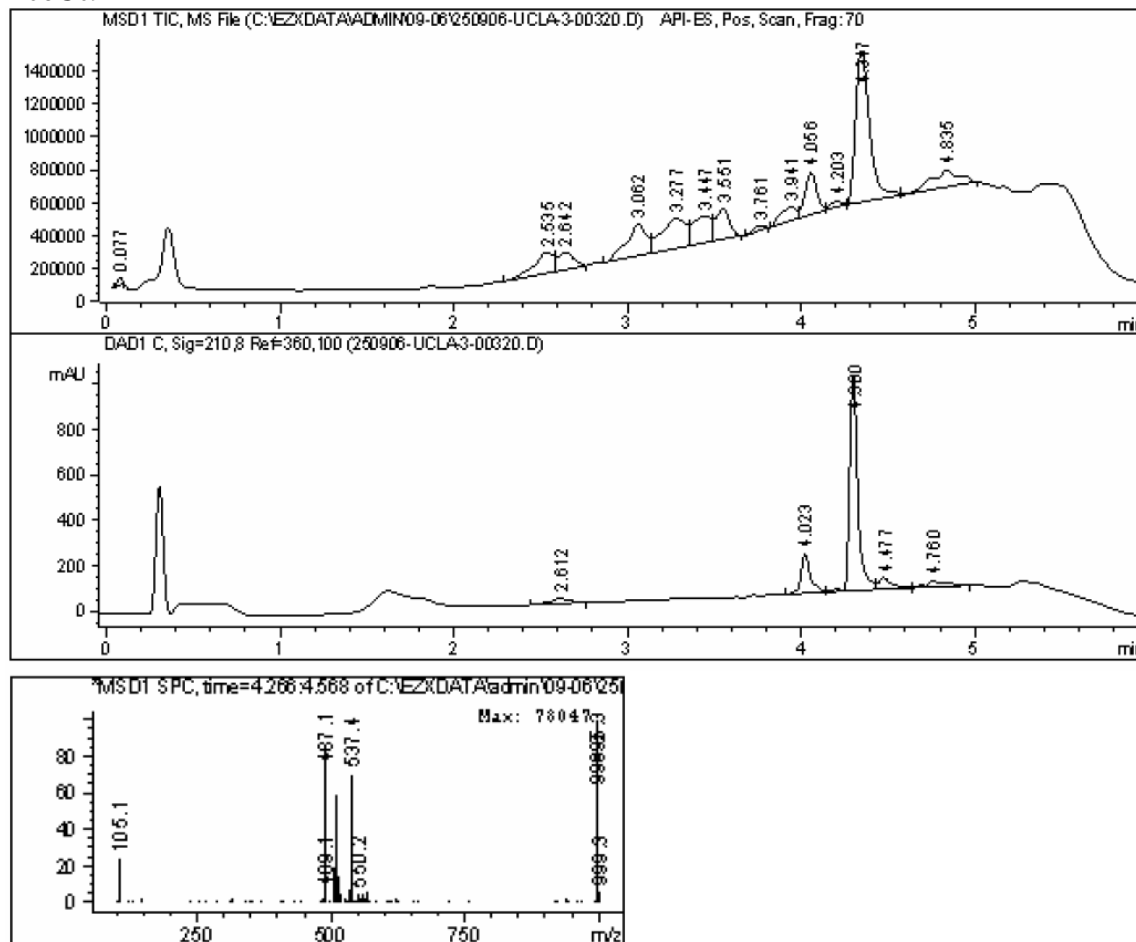

A06C10E17

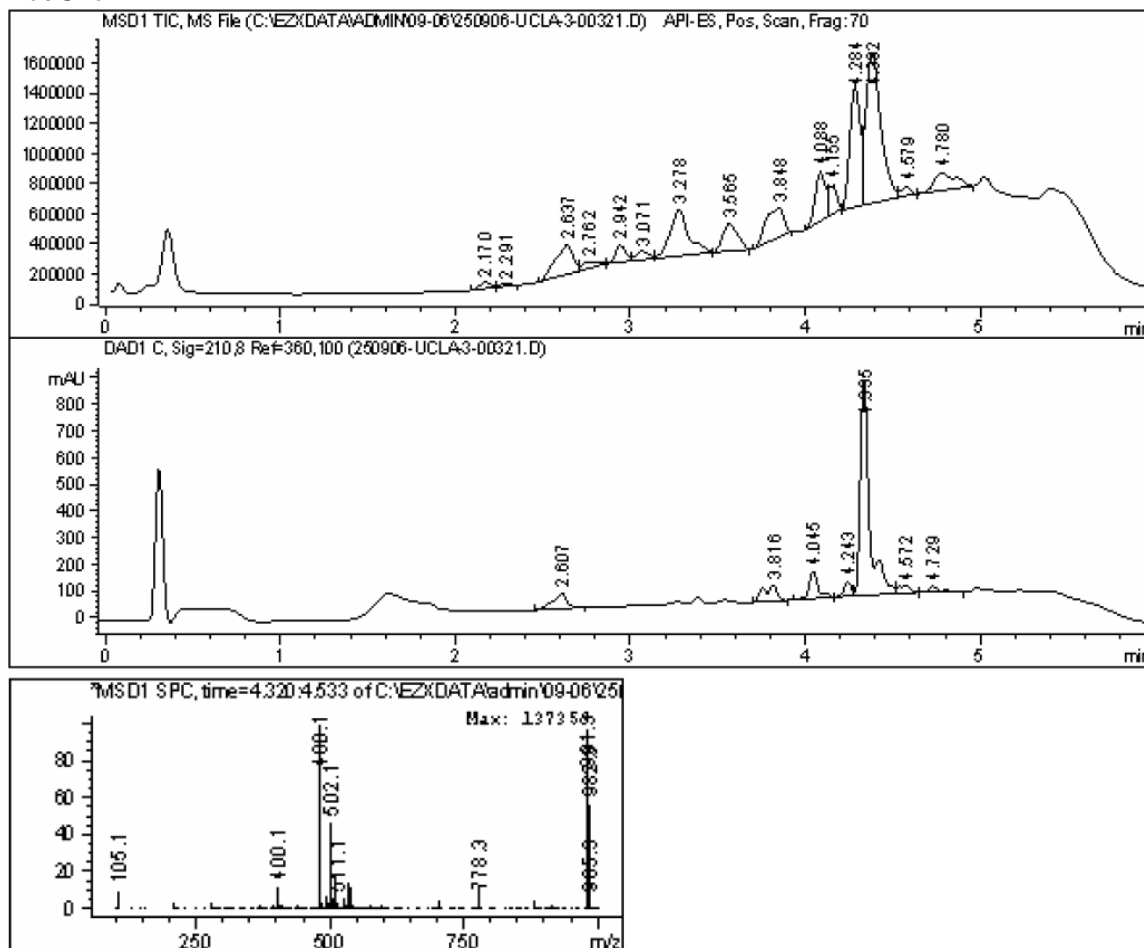

A05C05E01

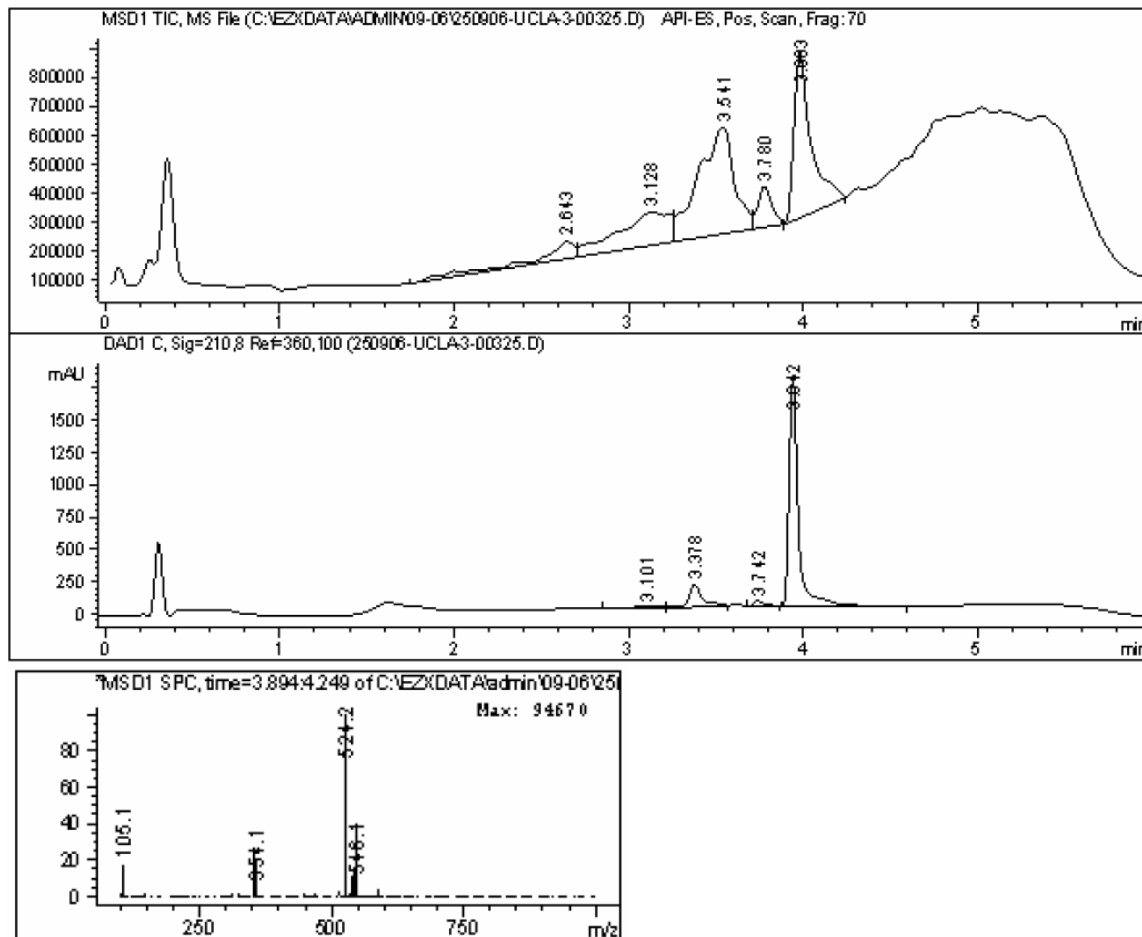

A06C09E23

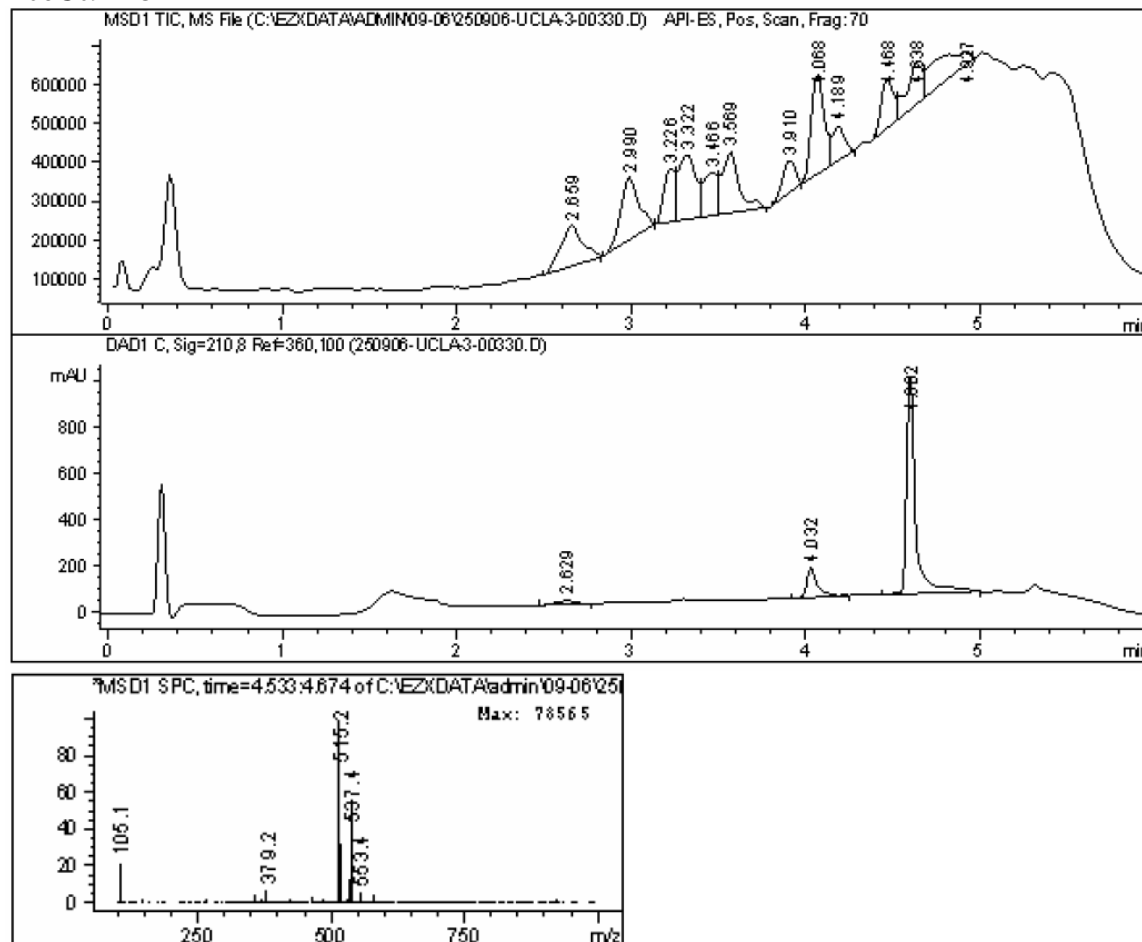

A08C09E20

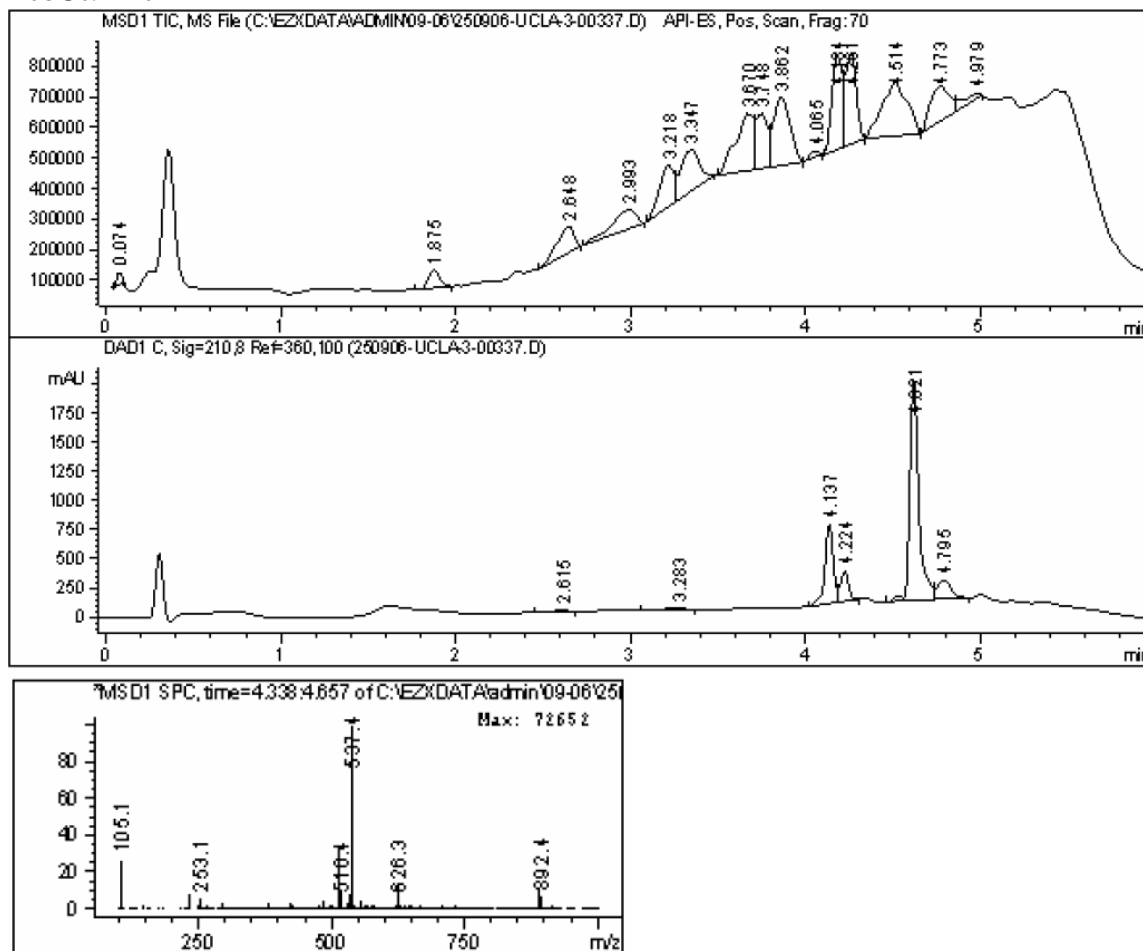

**A05C11E20**

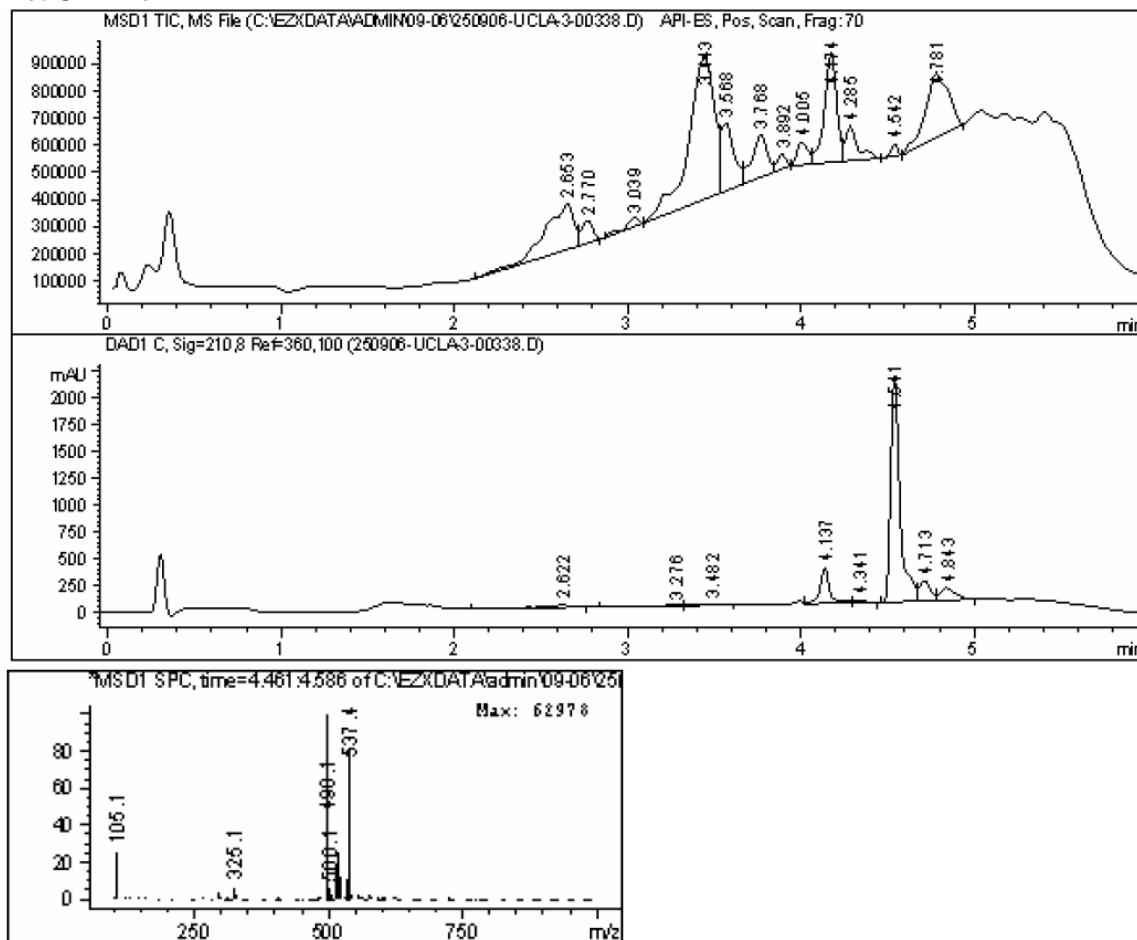

A07C14E32

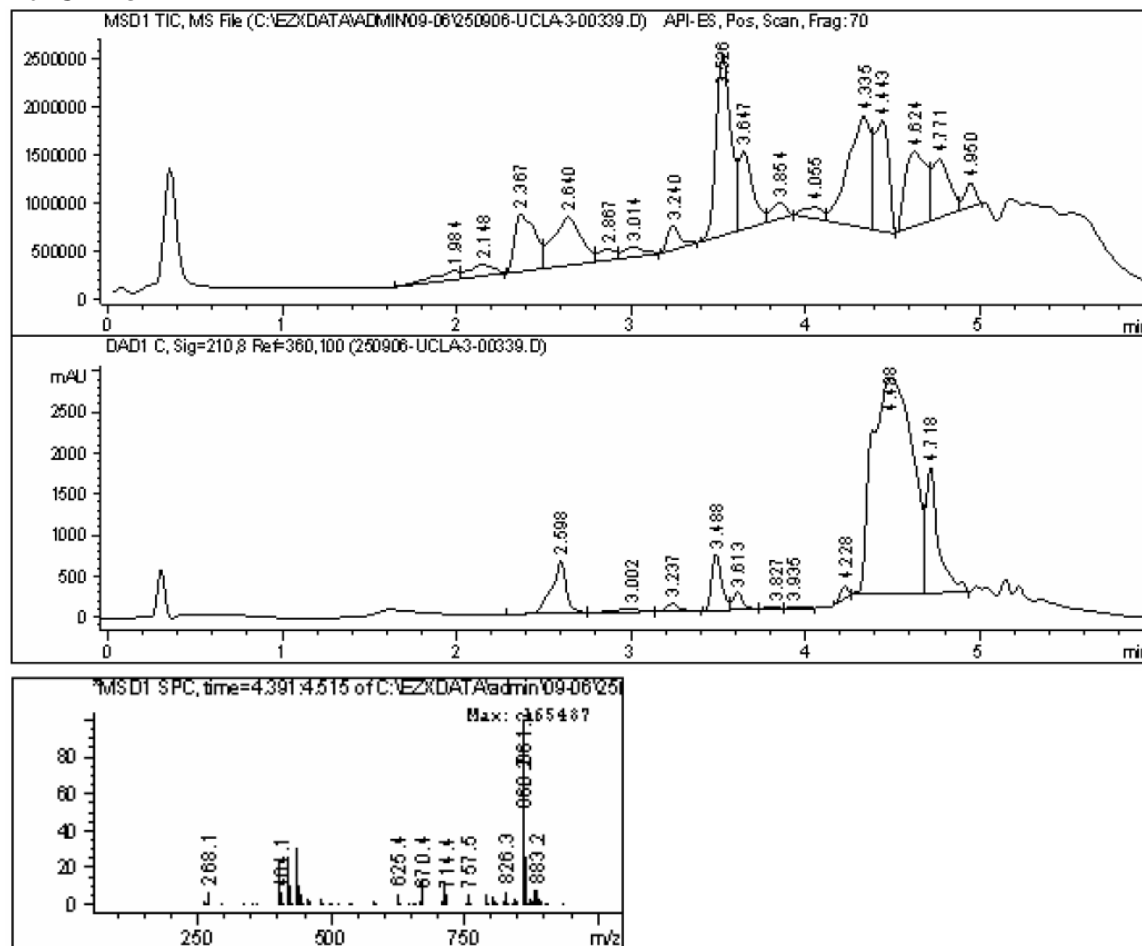

**A07C03 (81%)**

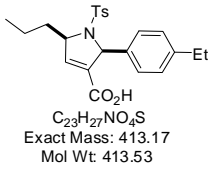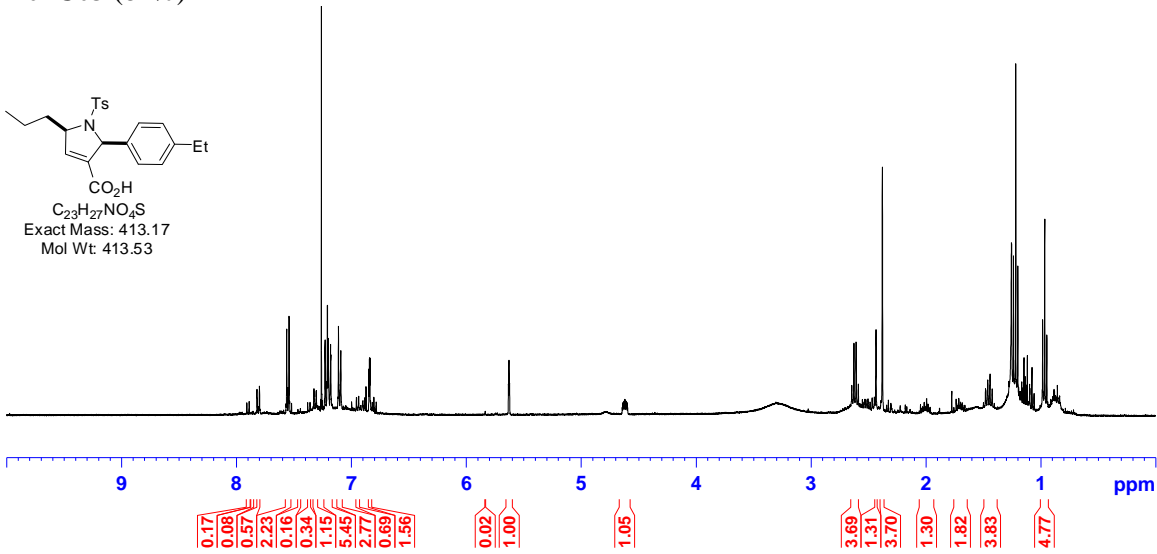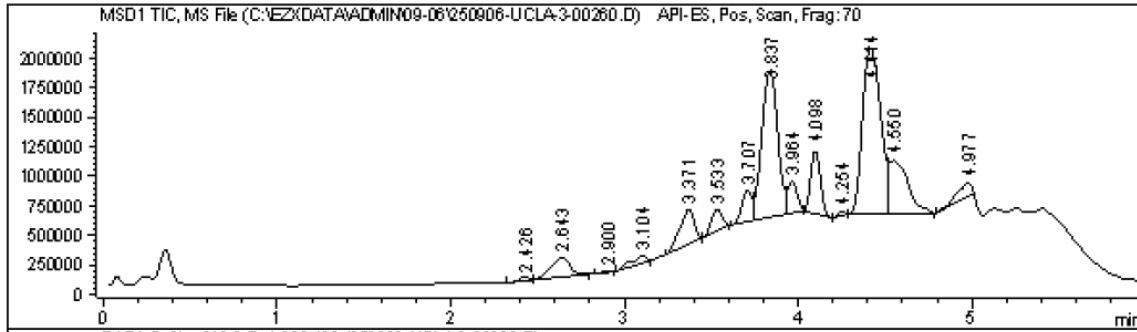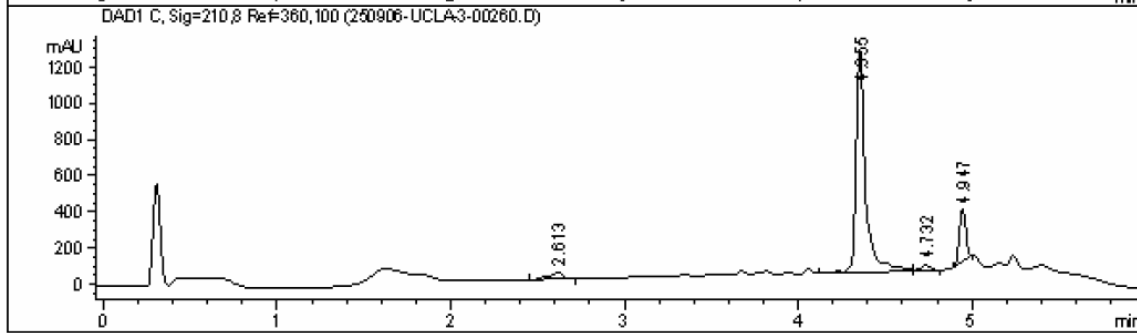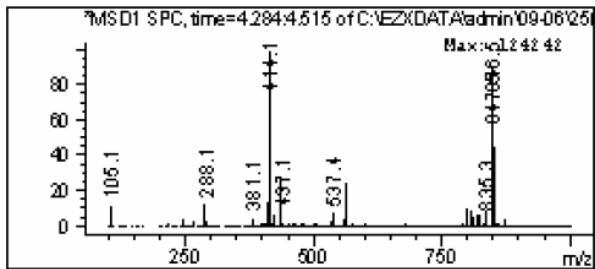



A09C03 (82%)

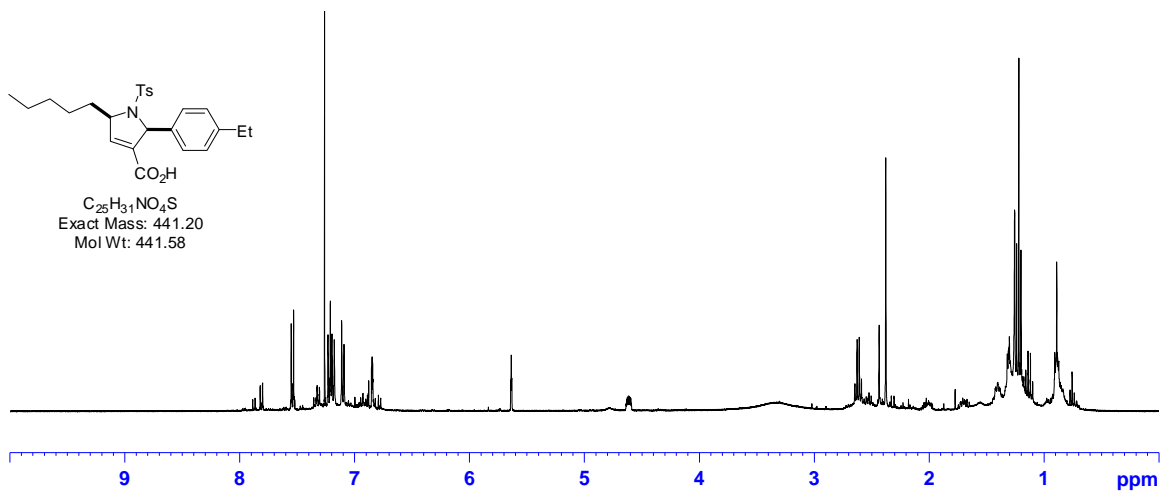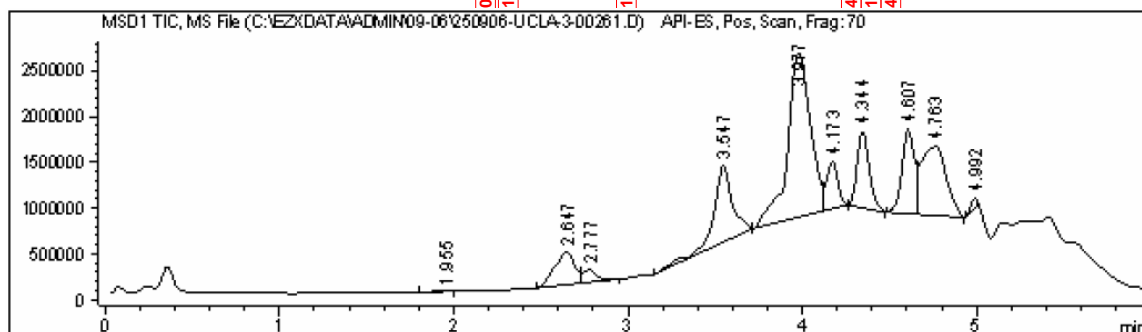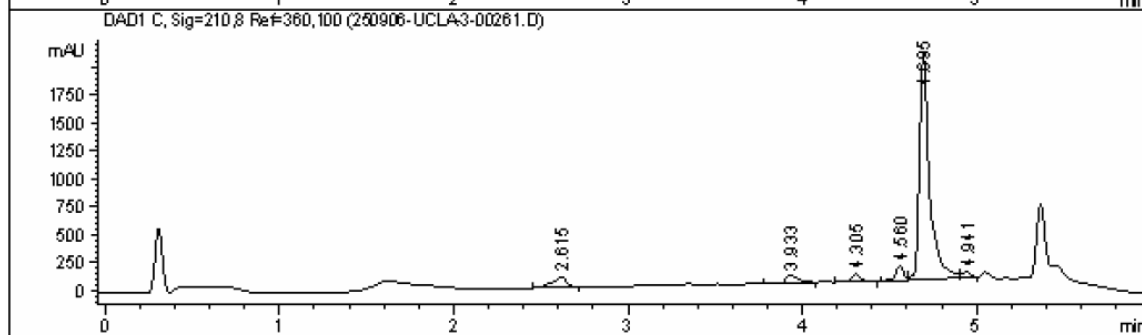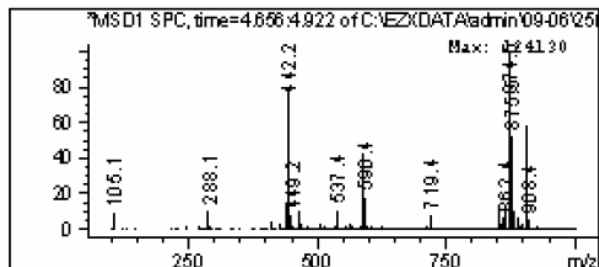

**A10C03 (84%)**

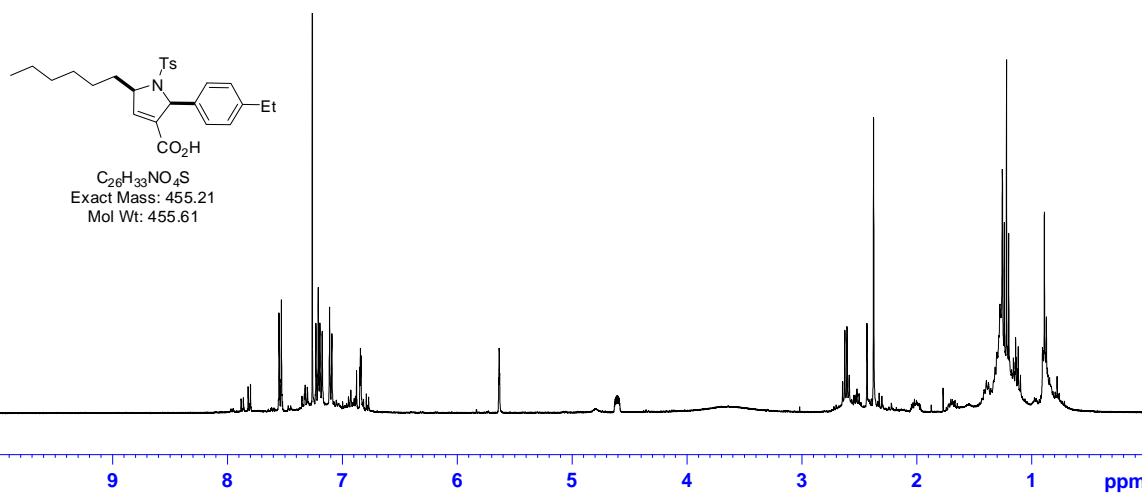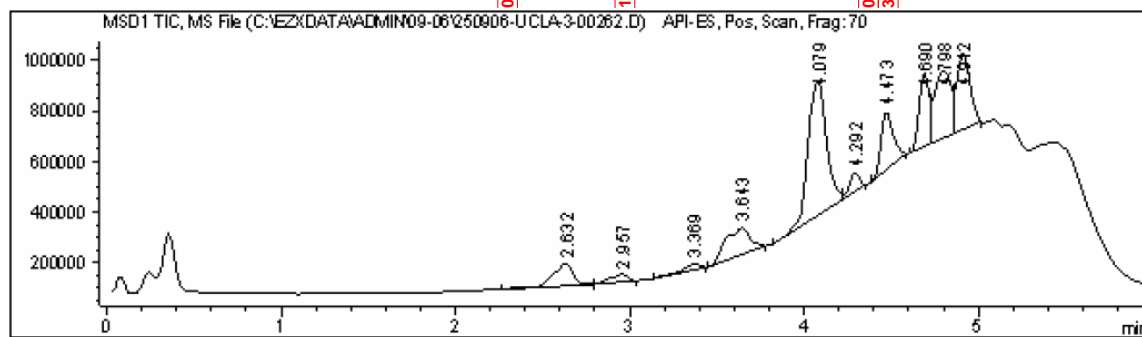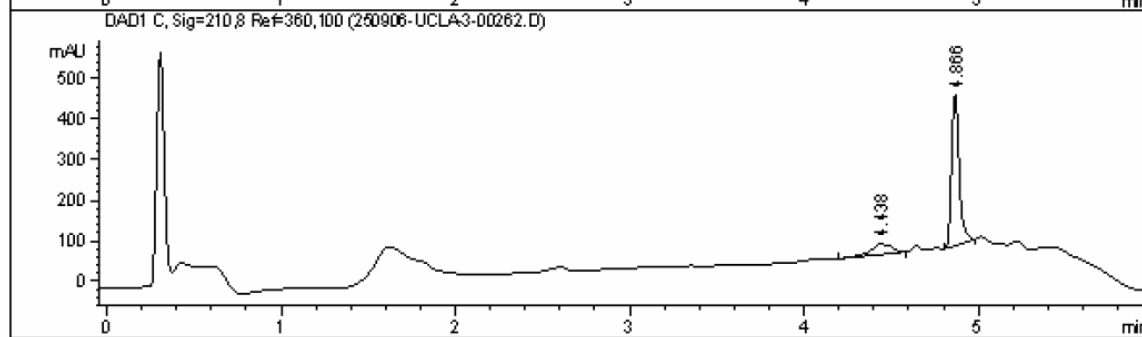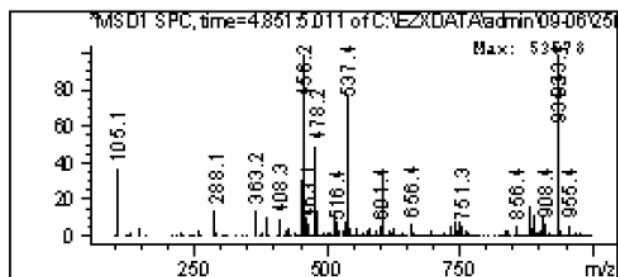

A03C01

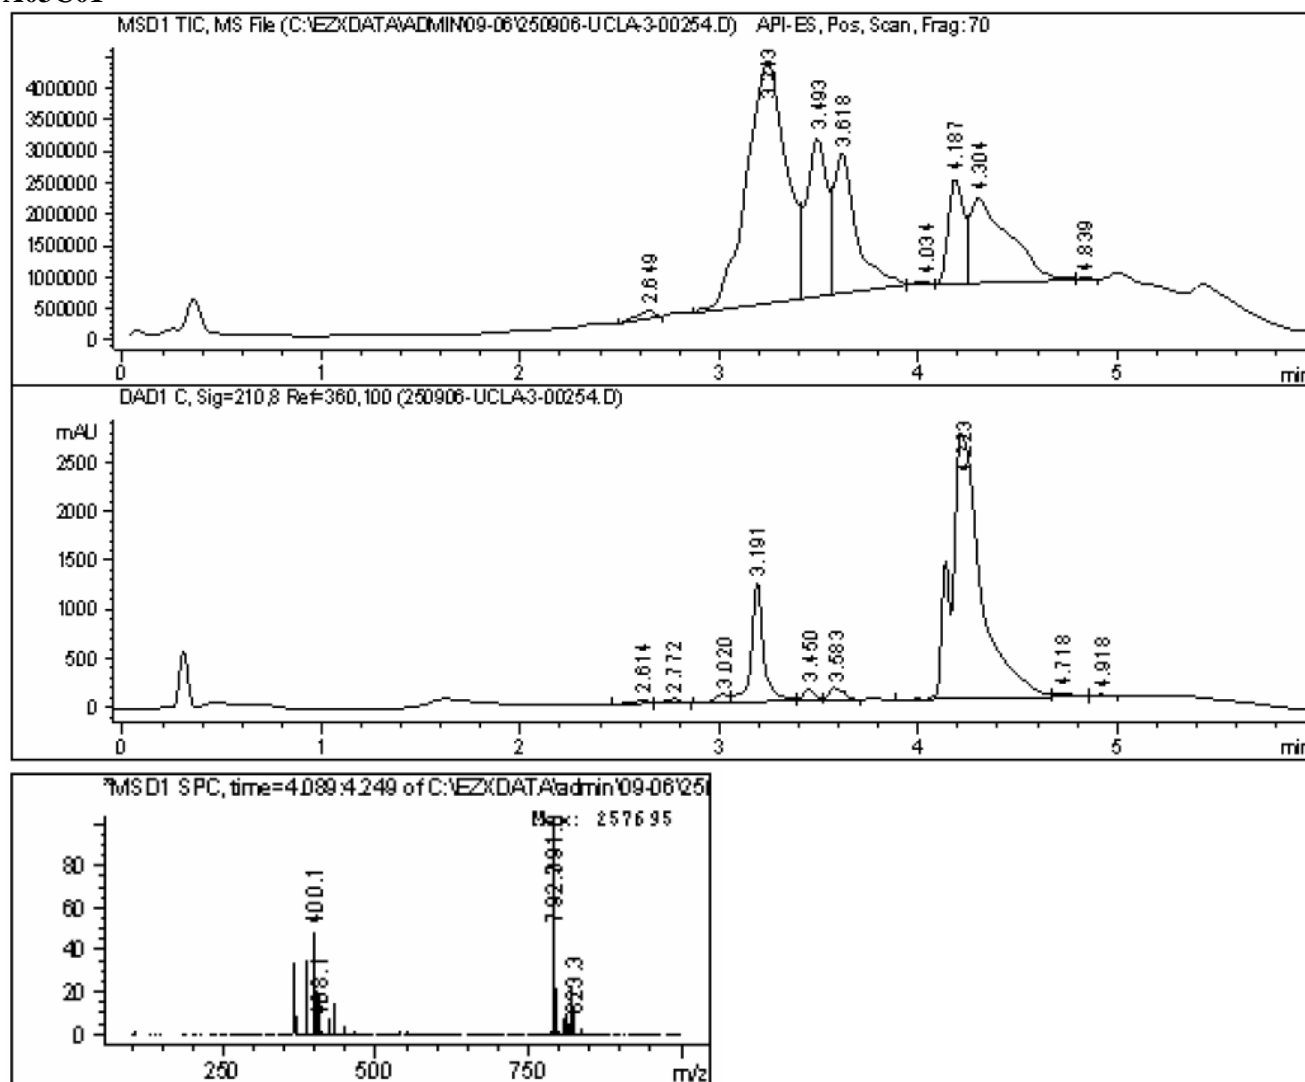

A03C10

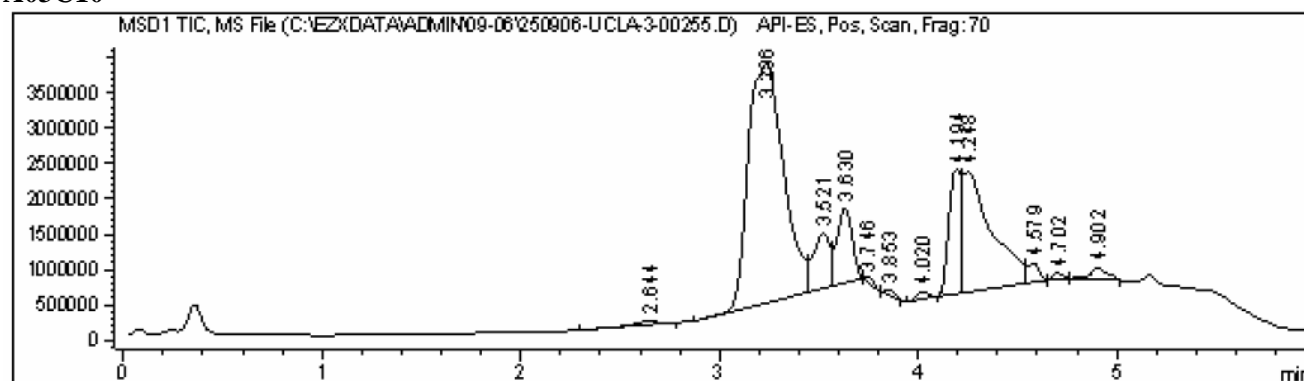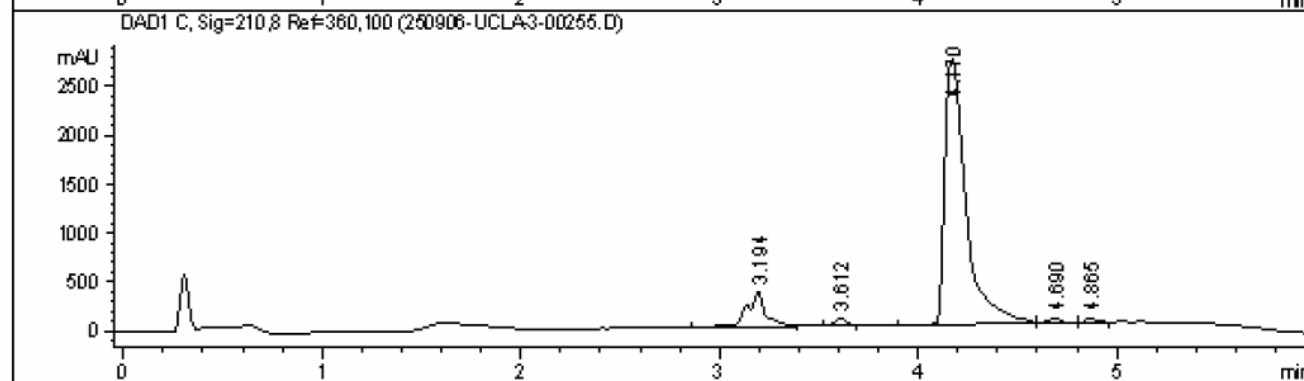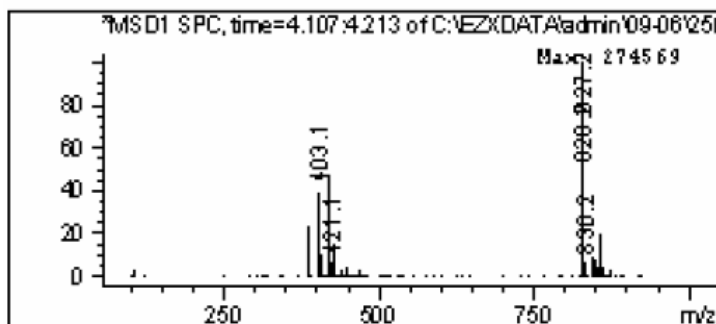

Component 1: Peak at Scan 237.9. Top ions are 418 857 842

A03C12

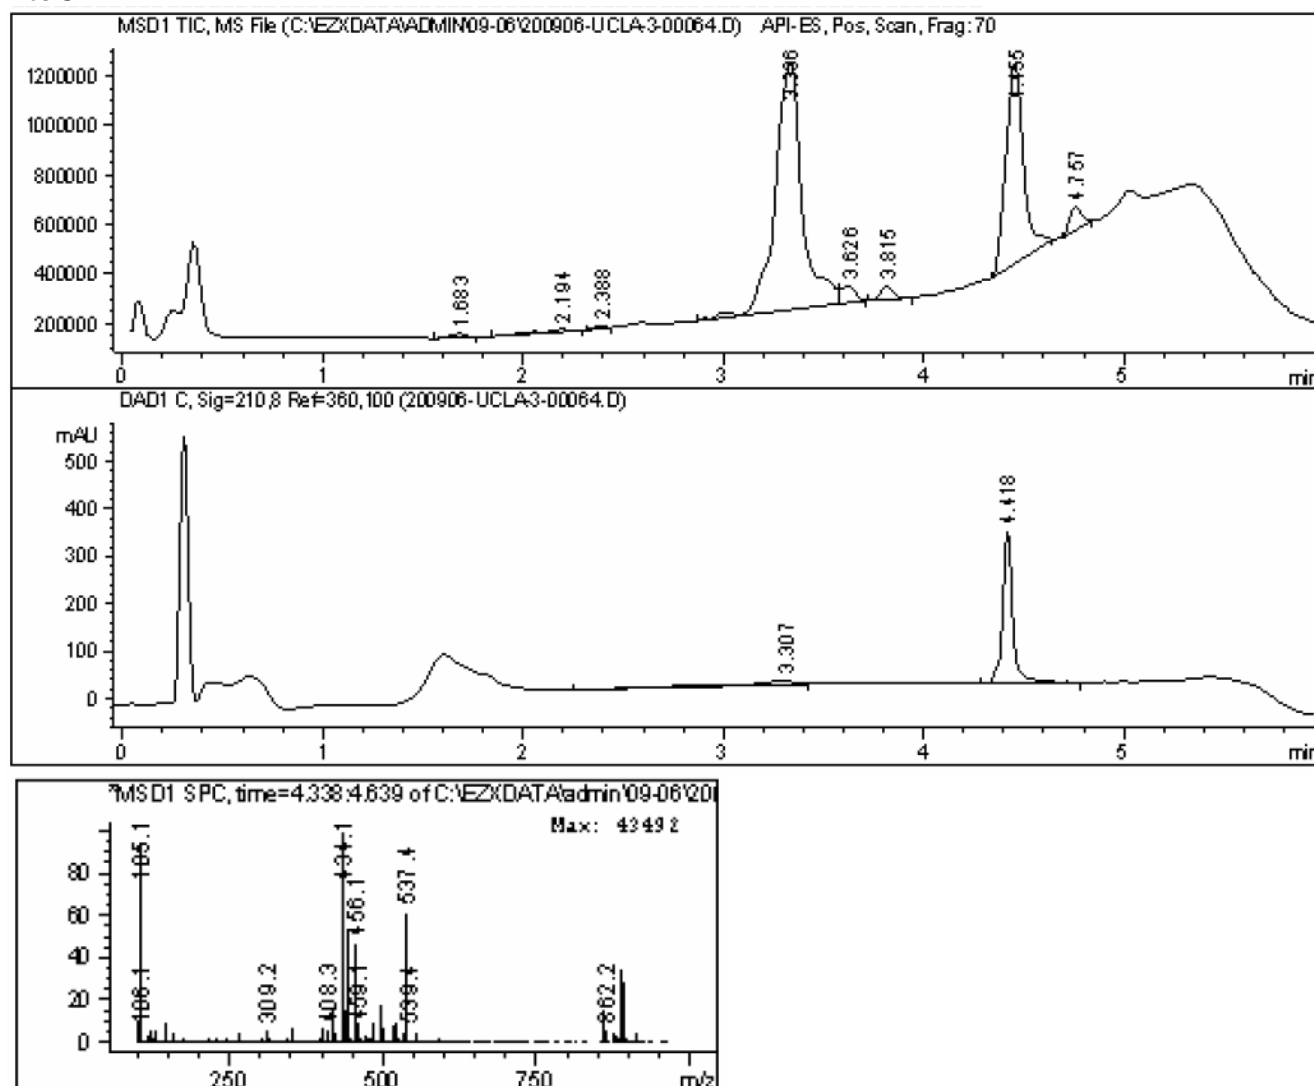

A03C26

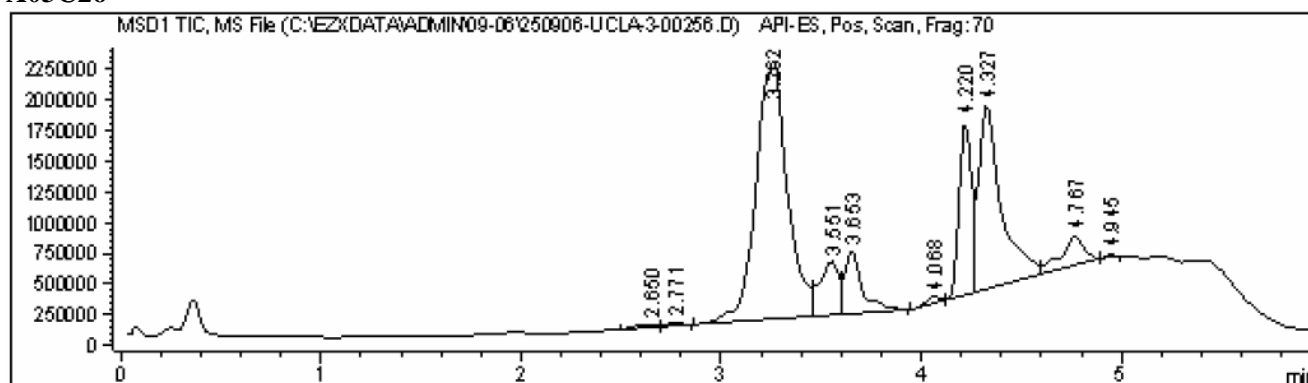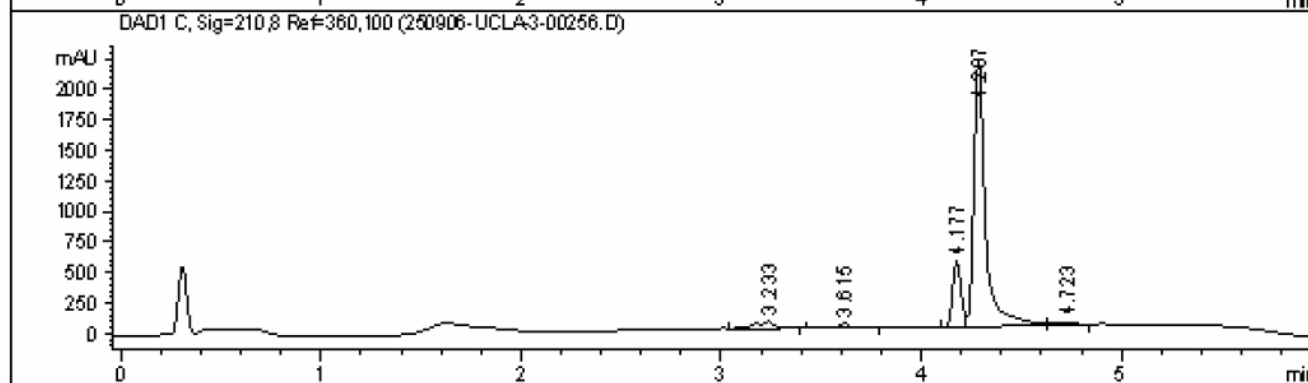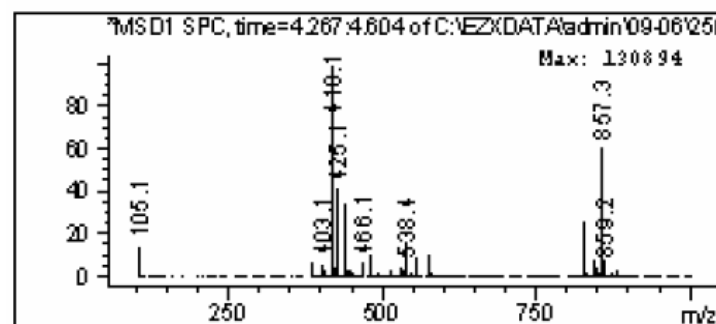

Component 2: Peak at Scan 243.8. Top ions are 418 857 858

A03C27

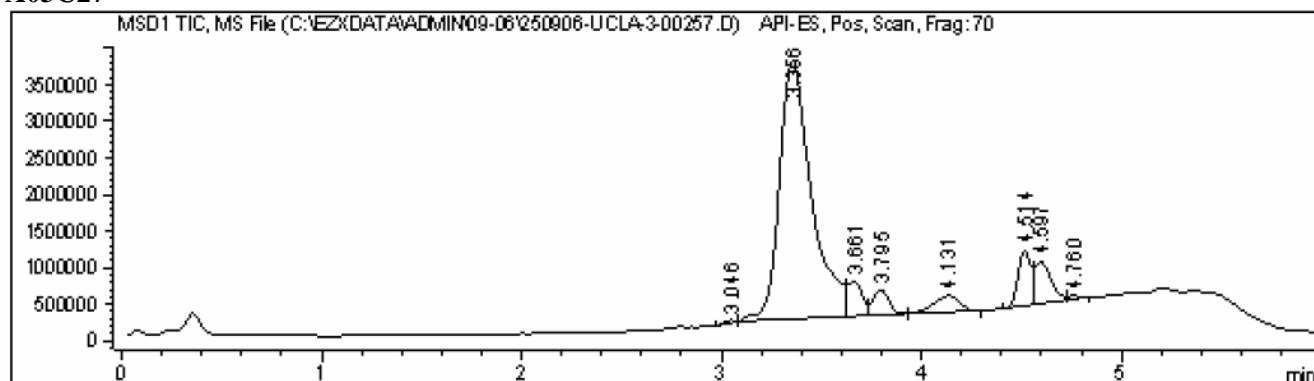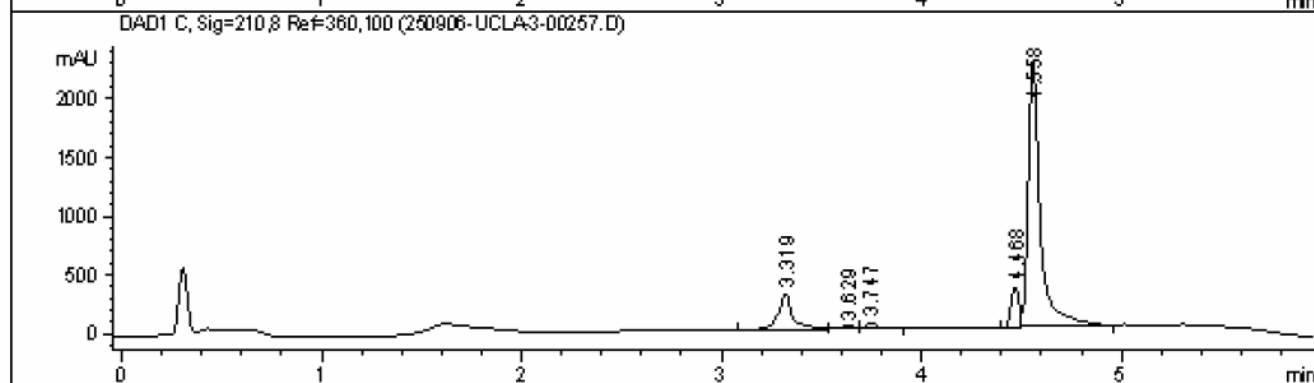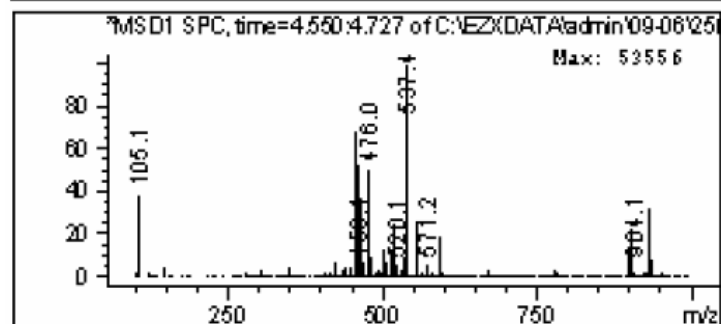

Component 2: Peak at Scan 258.8. Top ions are 454 476 931

A03C30

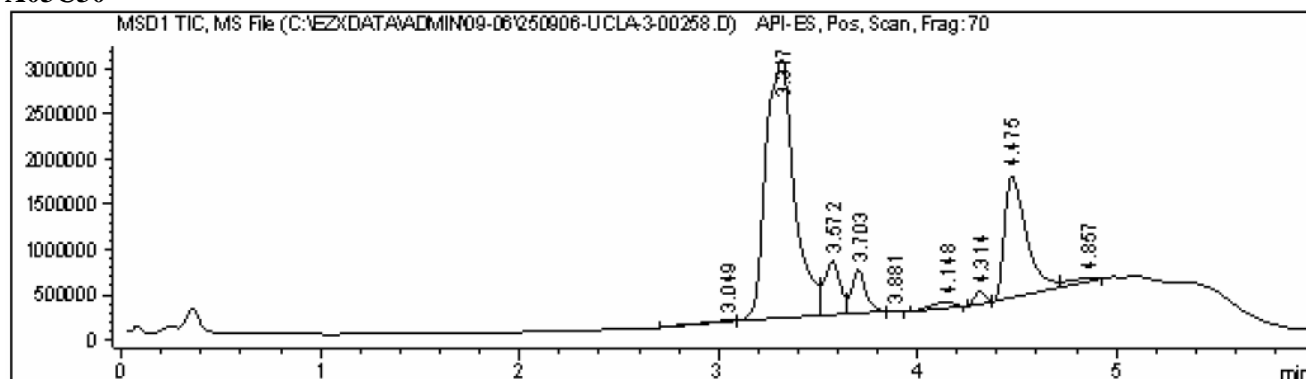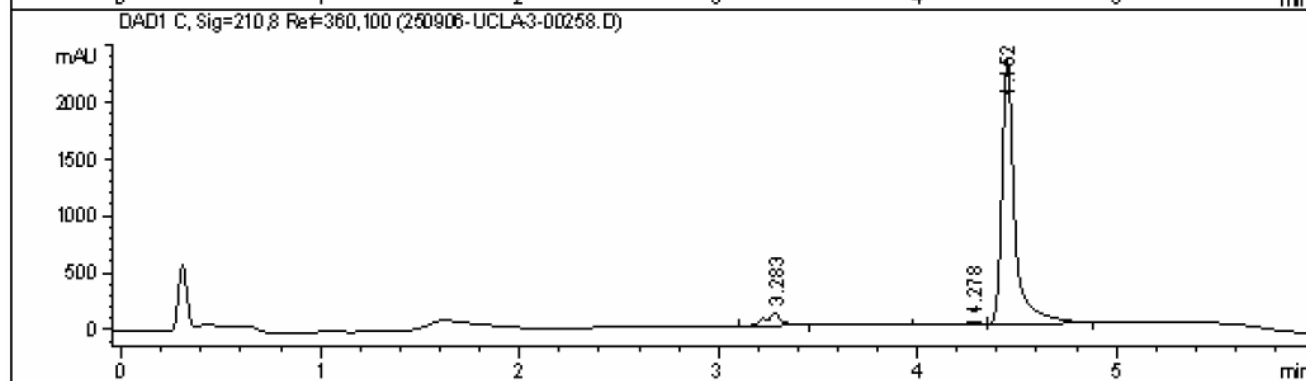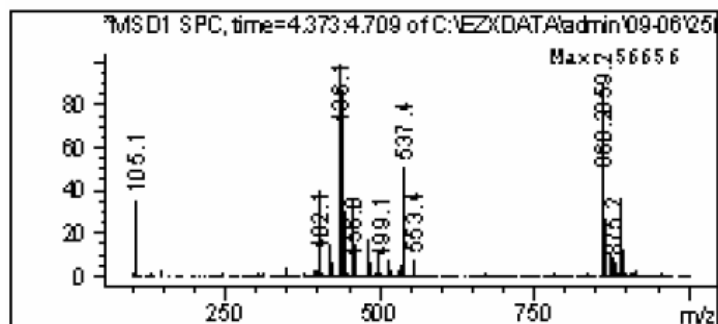



A03C41

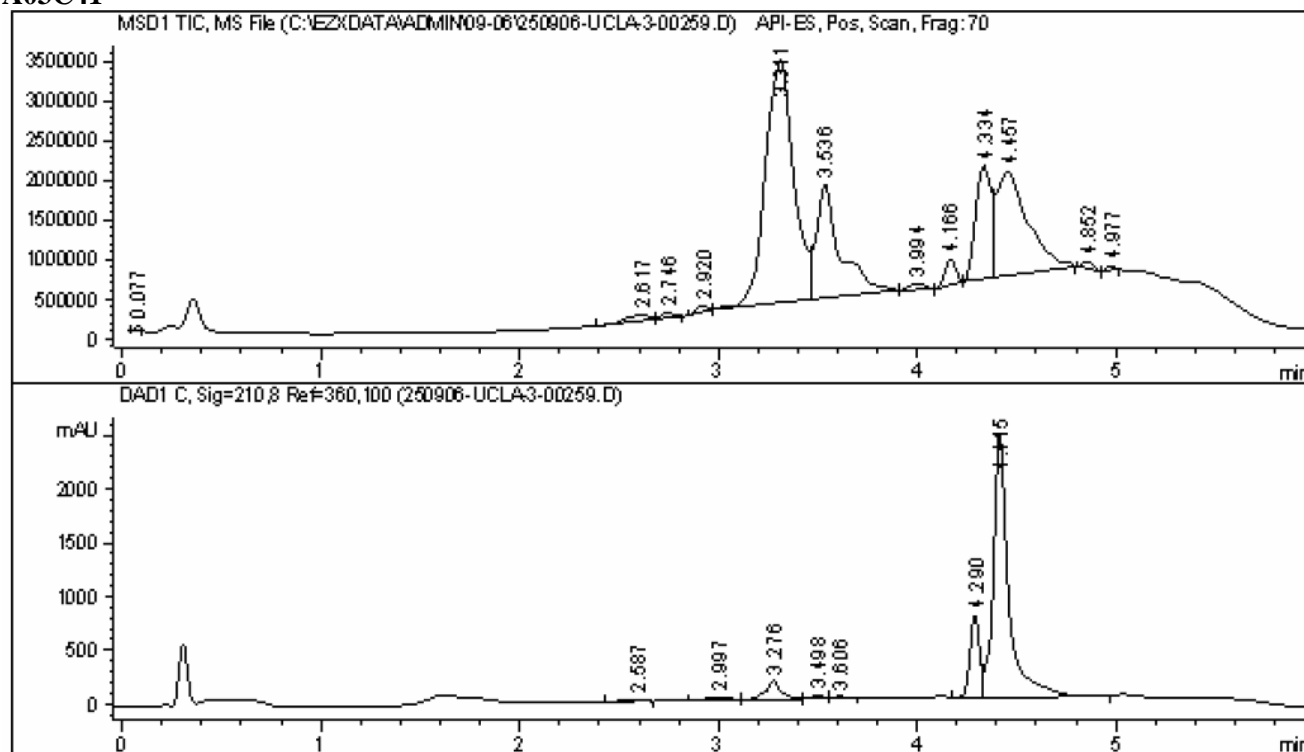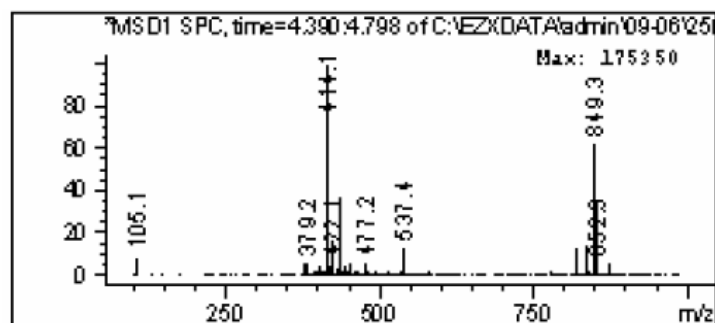

**6-(4-Methoxy-phenyl)-1-(toluene-4-sulfonyl)-1,2,5,6-tetrahydro-pyridine-3-carboxylic acid (B01C04)**

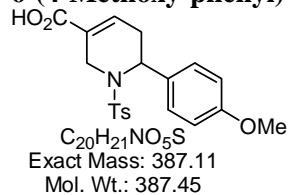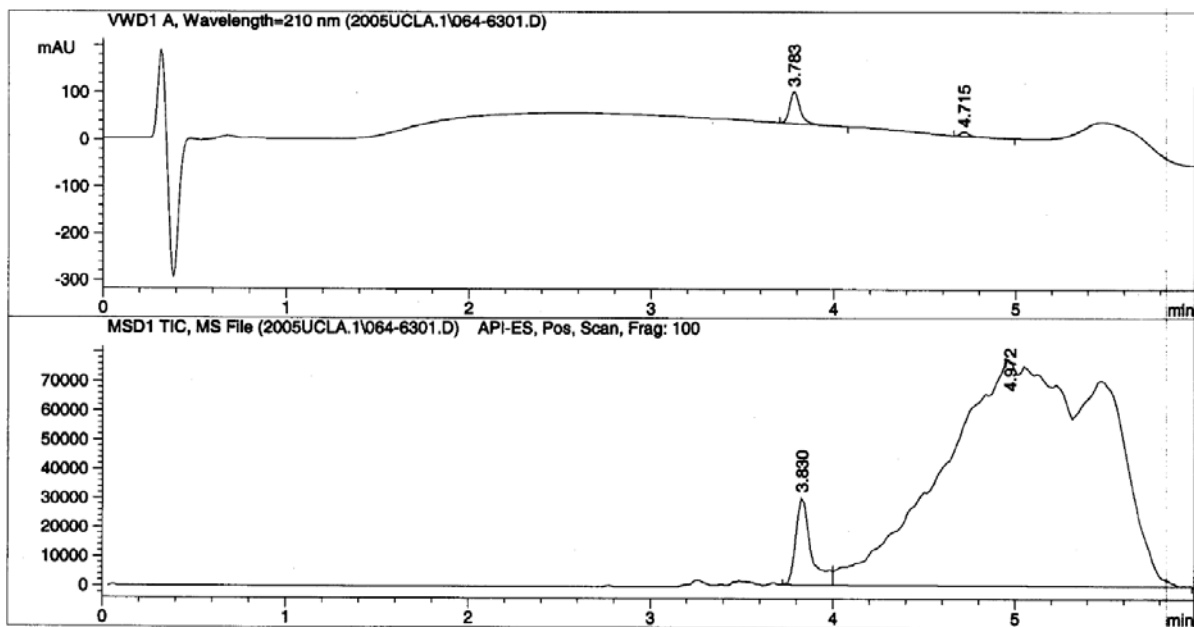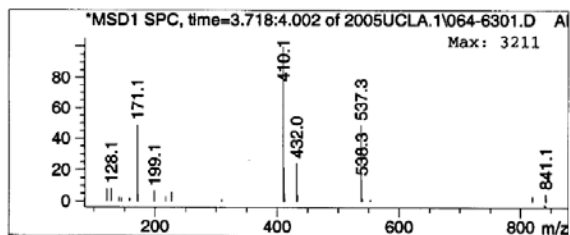

**6-(4-Cyanophenyl)-2-phenyl-1-(toluene-4-sulfonyl)-1,2,5,6-tetrahydropyridine-3-carboxylic acid (B02C09)**

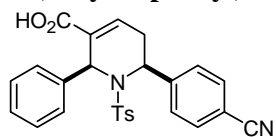

C<sub>26</sub>H<sub>22</sub>N<sub>2</sub>O<sub>4</sub>S  
Exact Mass: 458.13  
Mol. Wt.: 458.53

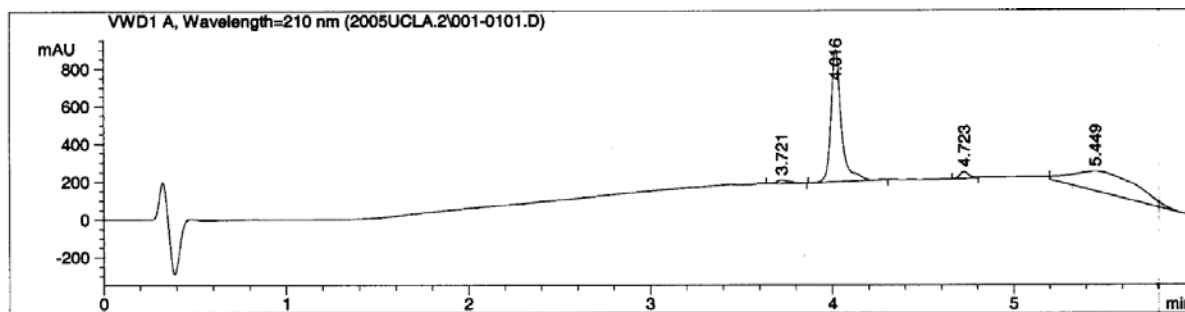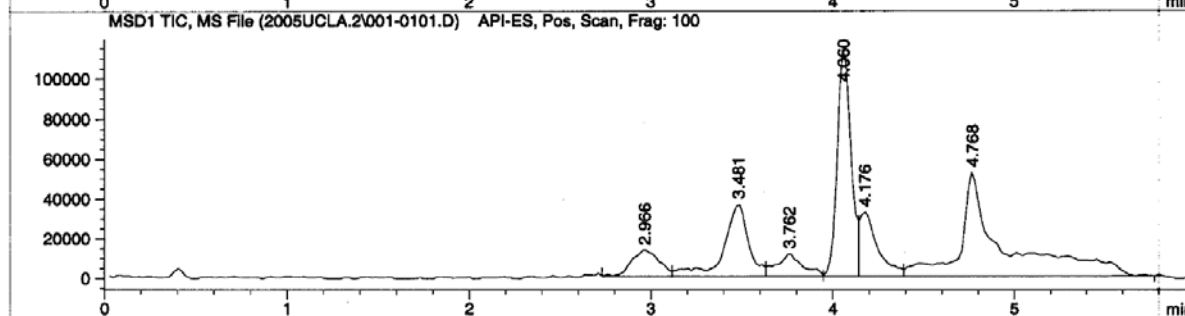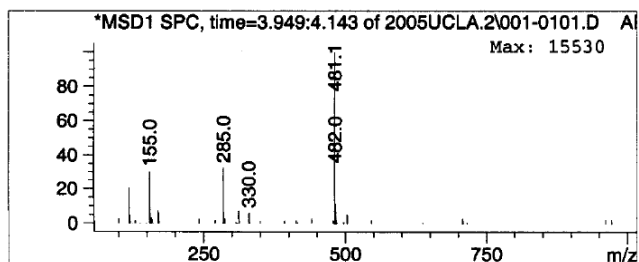

**2-(3-Fluorophenyl)-6-(3-methoxyphenyl)-1-(toluene-4-sulfonyl)-1,2,5,6-tetrahydropyridine-3-carboxylic acid (B04C39)**

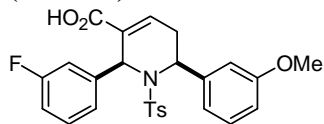

C<sub>26</sub>H<sub>24</sub>FNO<sub>5</sub>S  
Exact Mass: 481.14  
Mol. Wt.: 481.54

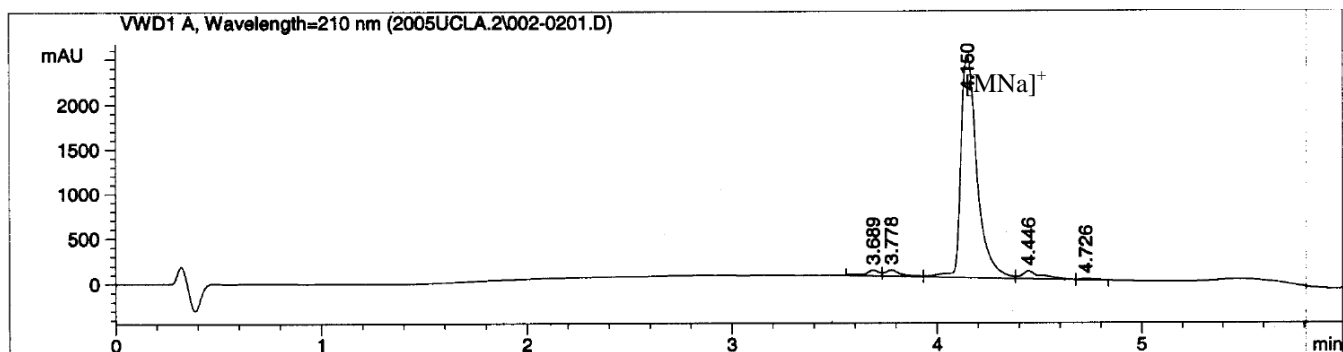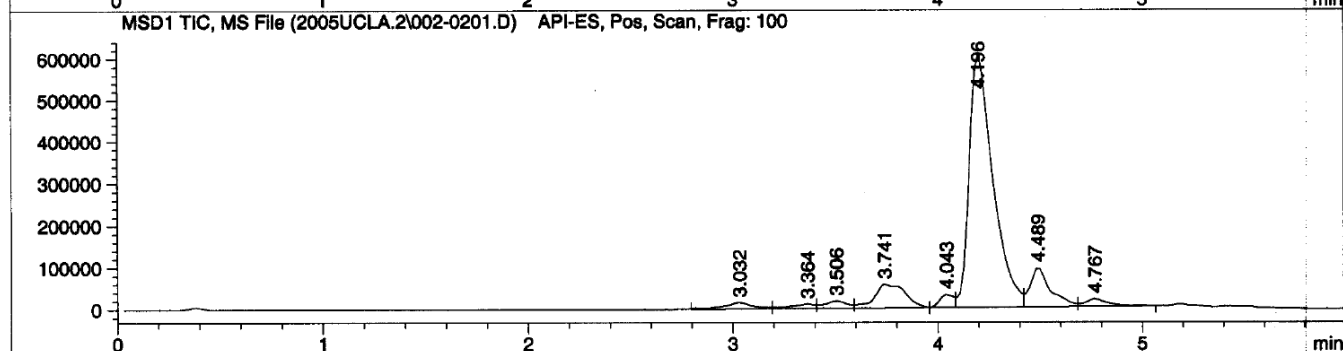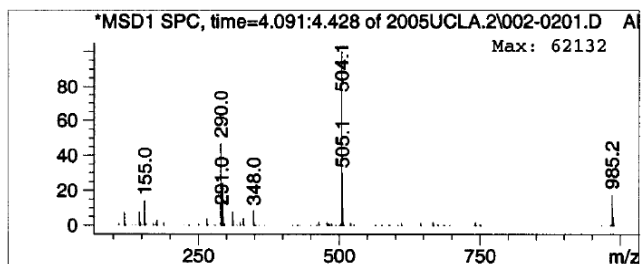

**2-(3-Bromophenyl)-6-(4-ethoxyphenyl)-1-(toluene-4-sulfonyl)-1,2,5,6-tetrahydropyridine-3-carboxylic acid (B06C05)**

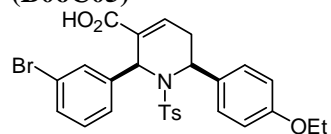

$C_{27}H_{26}BrNO_5S$   
Exact Mass: 555.07  
Mol. Wt.: 556.47

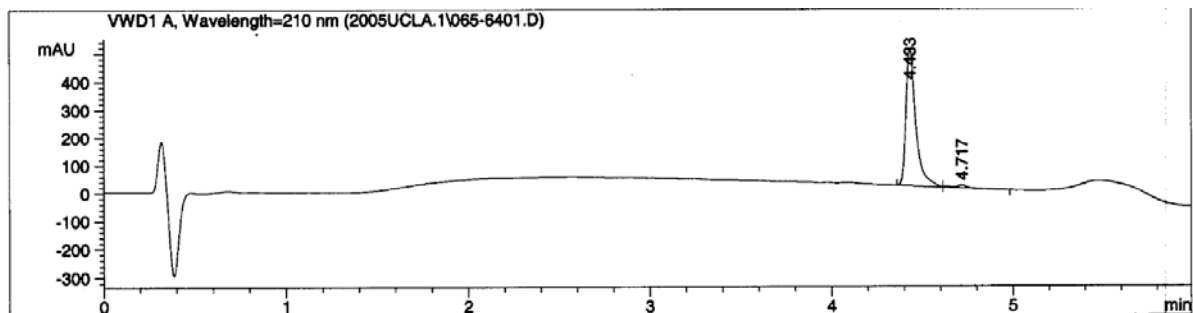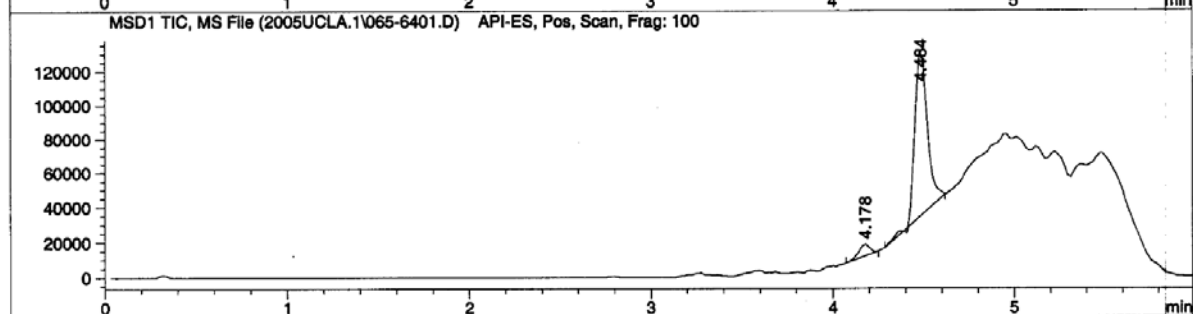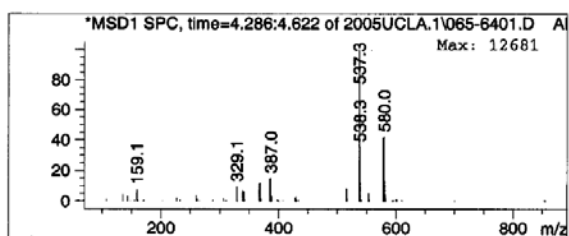

6-(2-Fluorophenyl)-1-(toluene-4-sulfonyl)-2-*m*-tolyl-1,2,5,6-tetrahydropyridine-3-carboxylic acid (B07C10)

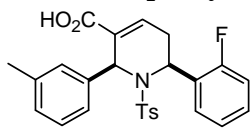

C<sub>26</sub>H<sub>24</sub>FNO<sub>4</sub>S  
Exact Mass: 465.14  
Mol. Wt.: 465.54

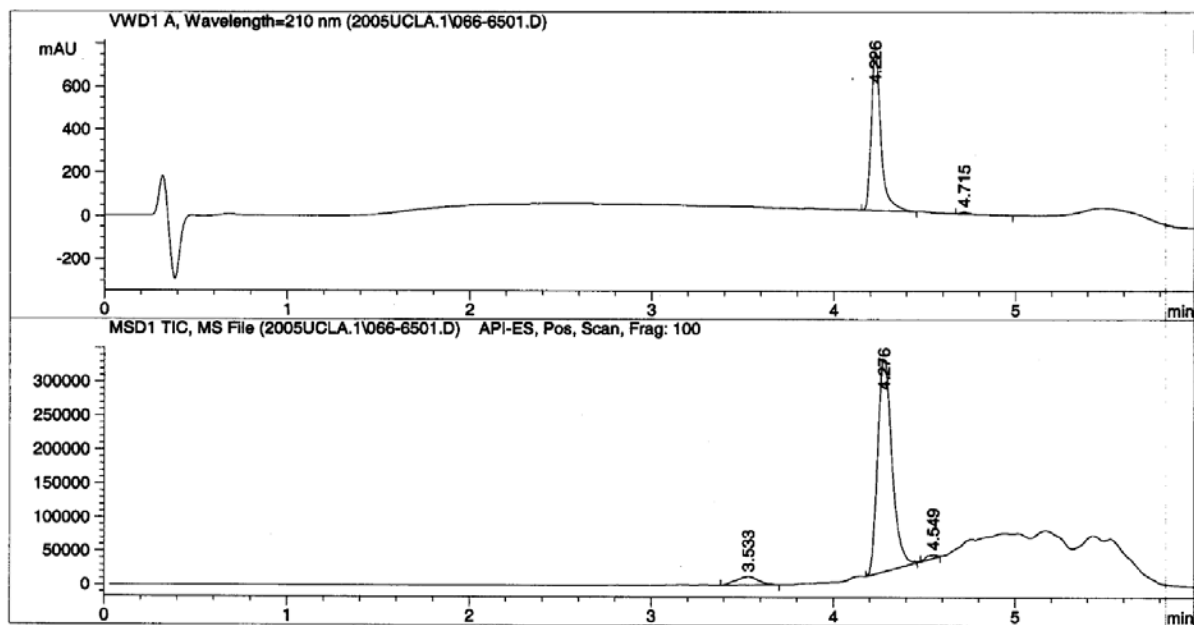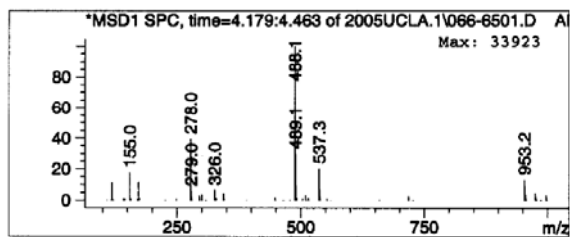

**Benzenesulfonyl-2-(4-fluorophenyl)-6-*p*-tolyl-1,2,5,6-tetrahydropyridine-3-carboxylic acid (B08C43)**

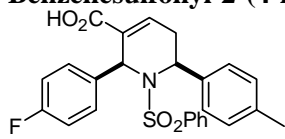

C<sub>25</sub>H<sub>22</sub>FNO<sub>4</sub>S  
Exact Mass: 451.13  
Mol. Wt.: 451.51

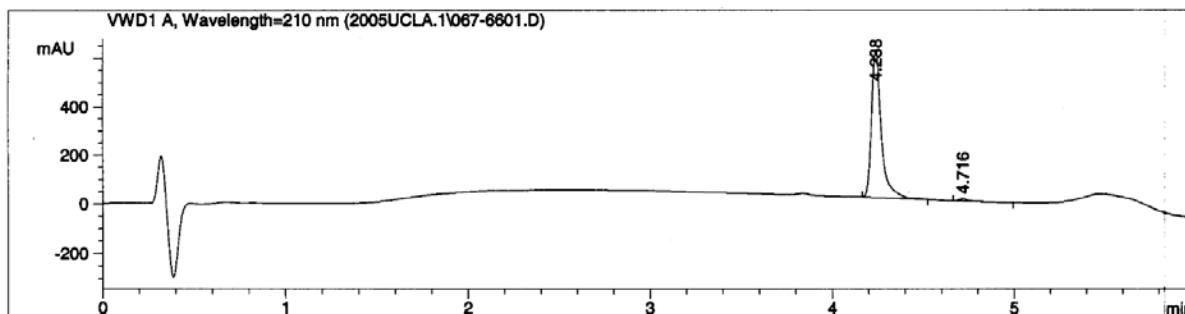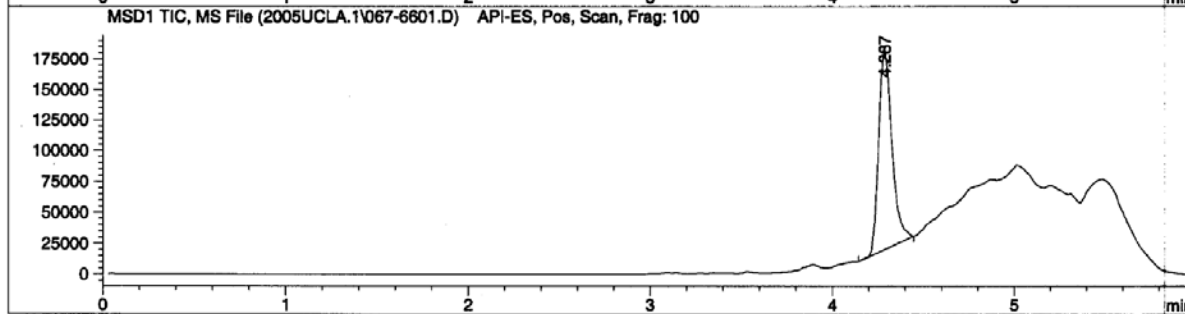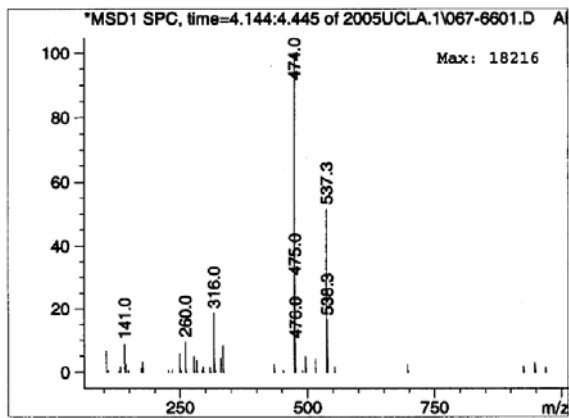

**2-(4-Bromophenyl)-6-(3-fluorophenyl)-1-(toluene-4-sulfonyl)-1,2,5,6-tetrahydropyridine-3-carboxylic acid (B10C26)**

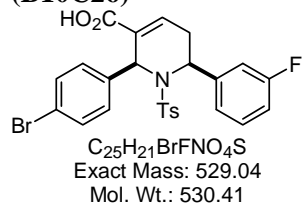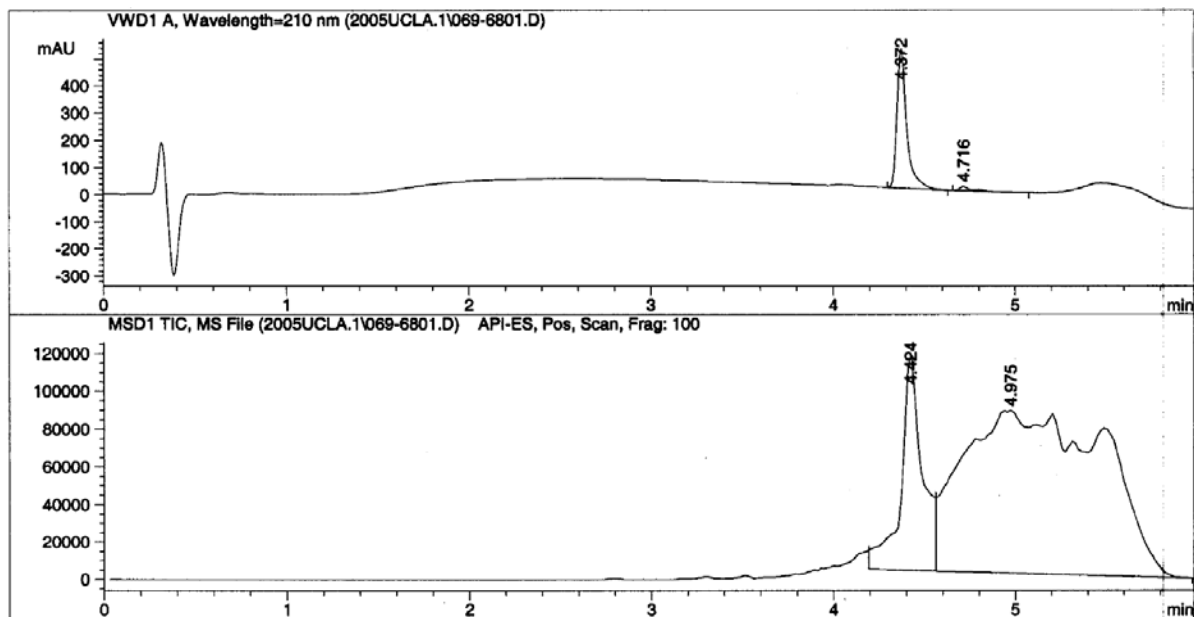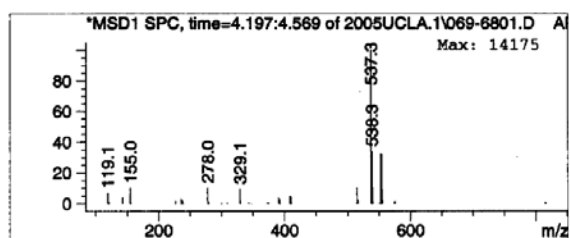

Component 3: Peak at Scan 248.4. Top ions are 552 554 278



# 6-Thiophen-2-yl-1-(toluene-4-sulfonyl)-2-*p*-tolyl-1,2,5,6-tetrahydropyridine-3-carboxylic acid (B11C21)

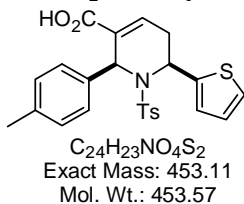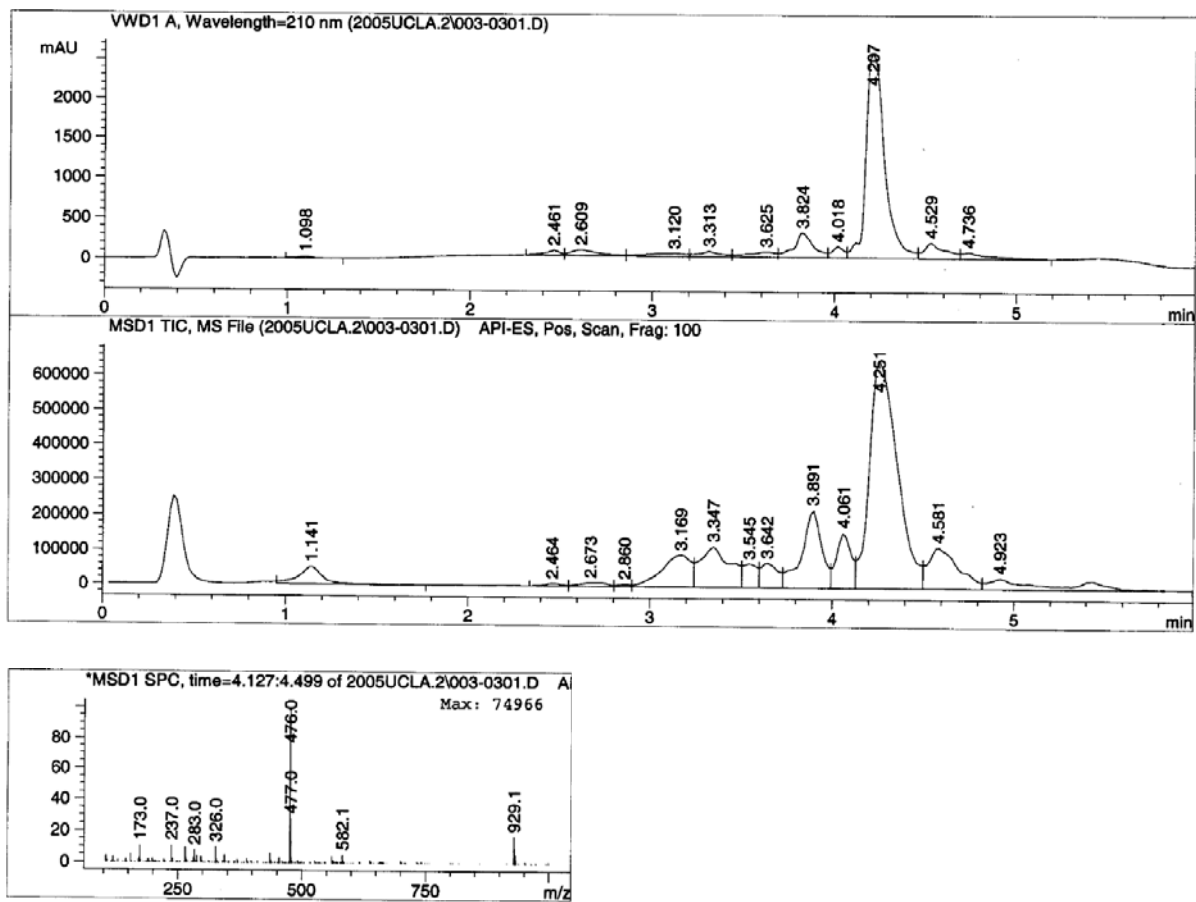

**2-(4-*tert*-Butylphenyl)-6-(4-cyanophenyl)-1-(toluene-4-sulfonyl)-1,2,5,6-tetrahydropyridine-3-carboxylic acid (B12C09)**

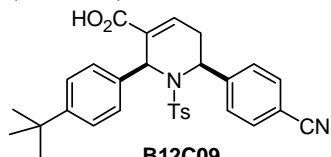

**B12C09**  
C<sub>30</sub>H<sub>30</sub>N<sub>2</sub>O<sub>4</sub>S  
Exact Mass: 514.19  
Mol. Wt.: 514.64

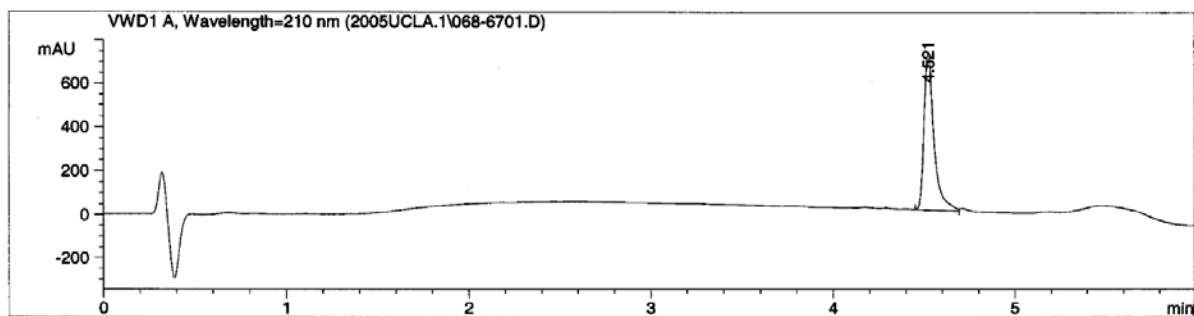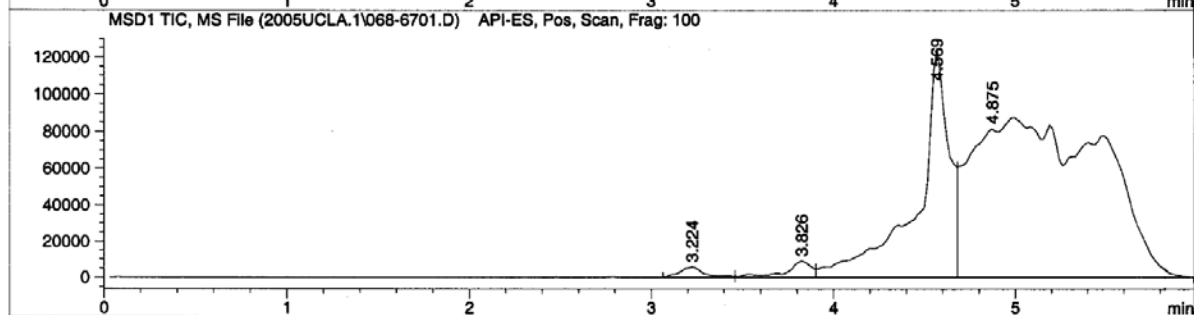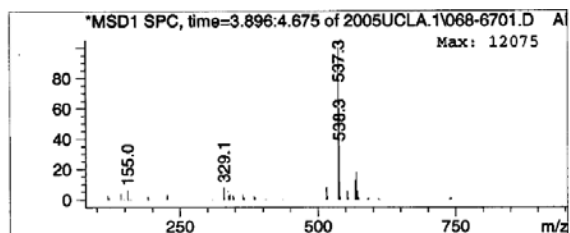

### 4-Benzylsulfanyl-6-phenyl-1-(toluene-4-sulfonyl)-piperidine-3-carboxylic acid (B01C01E06)

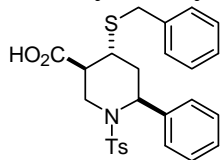

$C_{26}H_{27}NO_4S_2$   
Exact Mass: 481.14  
Mol. Wt.: 481.63

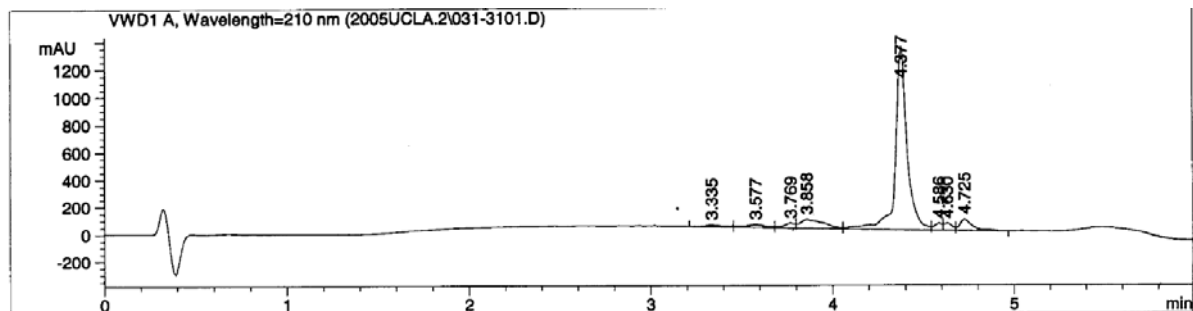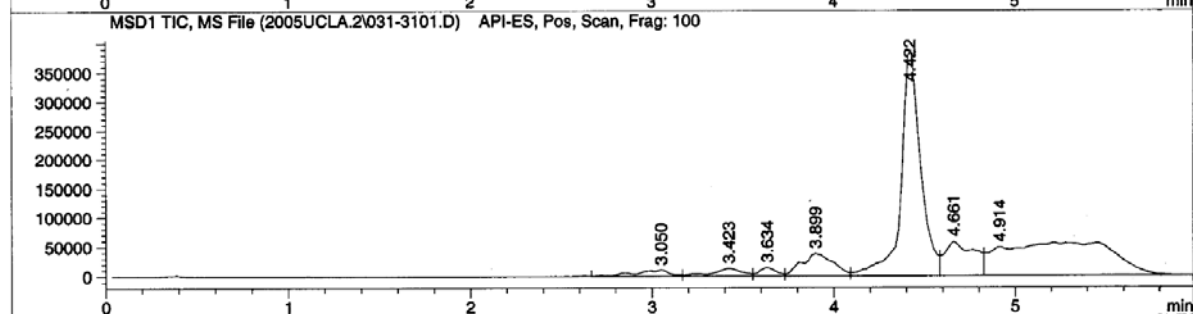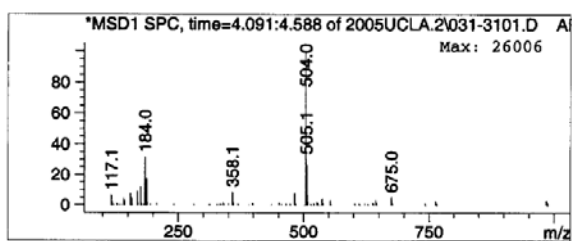

### 6-Phenyl-4-propylsulfanyl-1-(toluene-4-sulfonyl)-piperidine-3-carboxylic acid (B01C01E18)

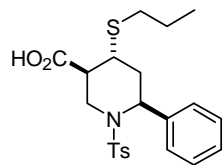

$C_{22}H_{27}NO_4S_2$   
Exact Mass: 433.14  
Mol. Wt.: 433.58

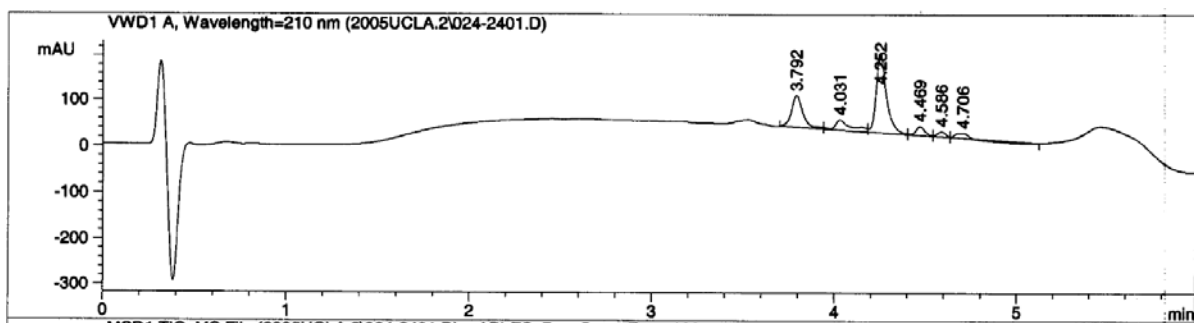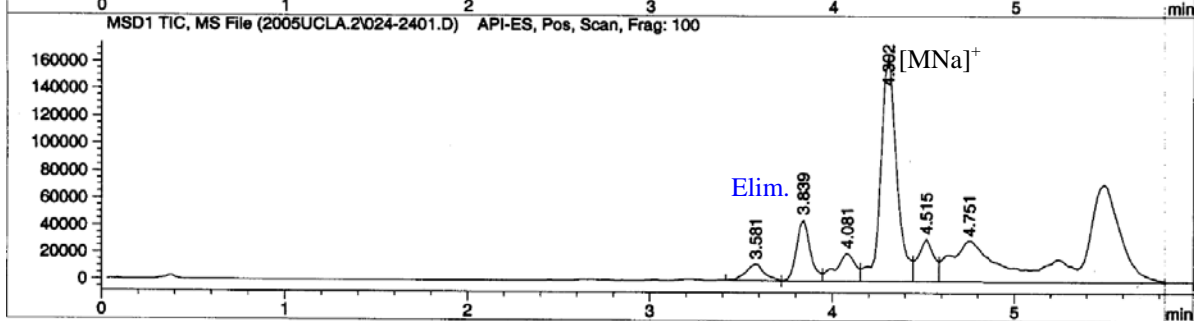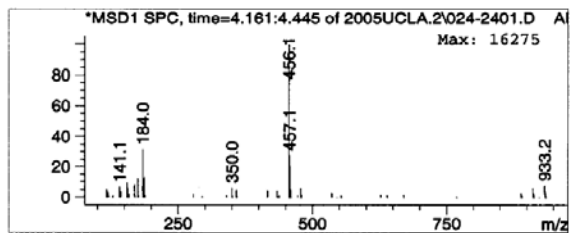

**4-(4-Methoxyphenylsulfanyl)-1-(toluene-4-sulfonyl)-6-*p*-tolylpiperidine-3-carboxylic acid (B01C02E04)**

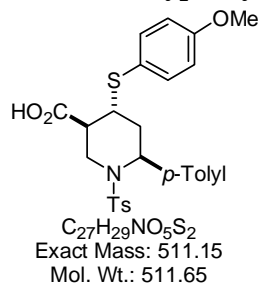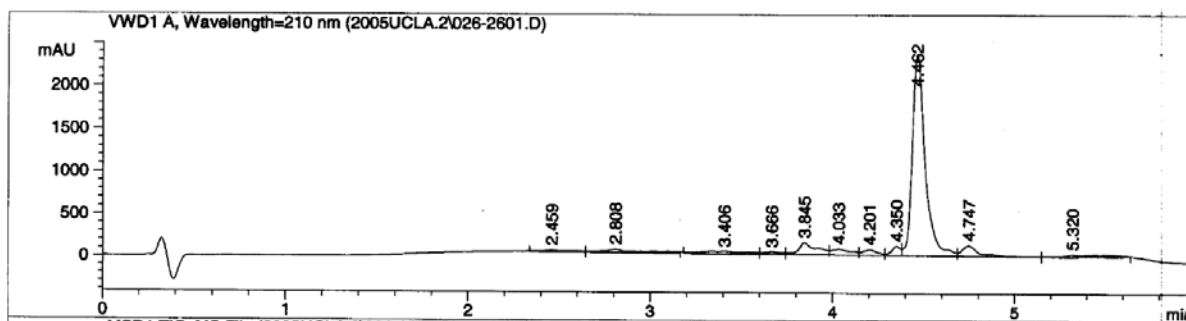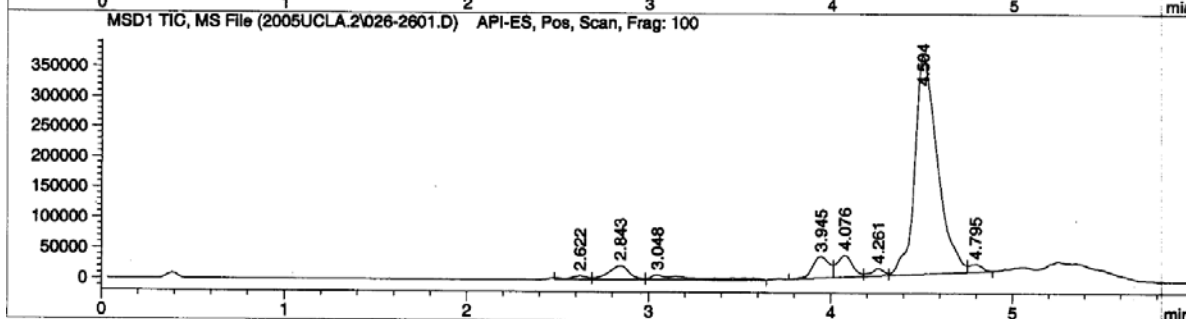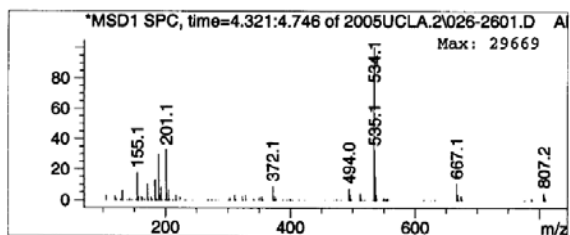

**6-(4-Ethylphenyl)-4-phenylsulfanyl-1-(toluene-4-sulfonyl)-piperidine-3-carboxylic acid (B01C03E01)**

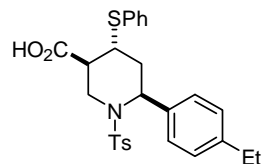

C<sub>27</sub>H<sub>29</sub>NO<sub>4</sub>S<sub>2</sub>  
Exact Mass: 495.15  
Mol. Wt.: 495.65

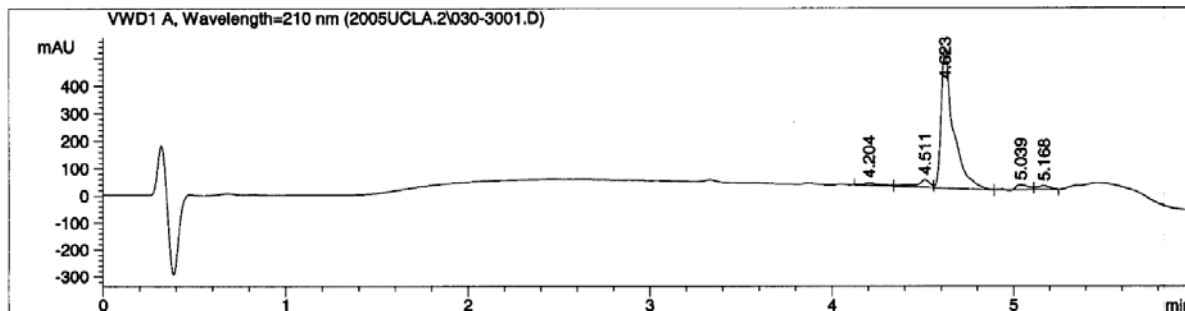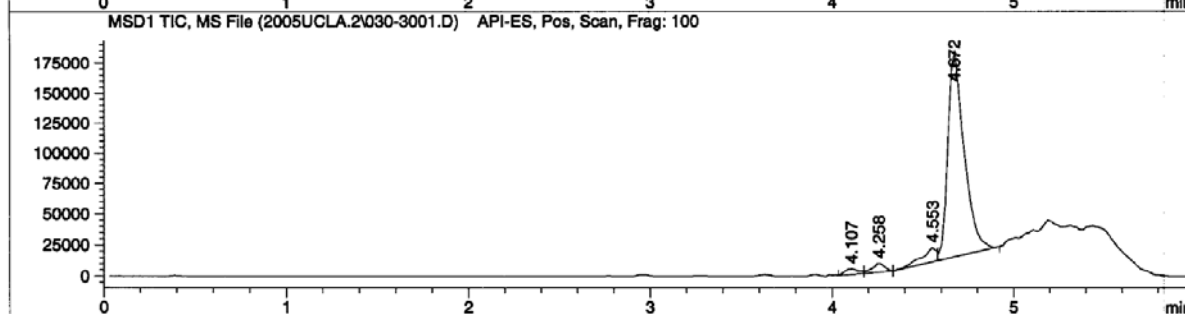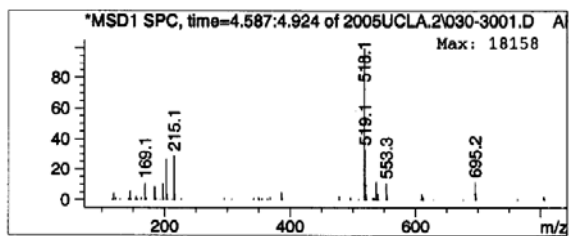

1-(4-Chlorobenzenesulfonyl)-4-(4-chlorobenzylsulfanyl)-6-*p*-tolyl-piperidine-3-carboxylic acid (B01C30E09)

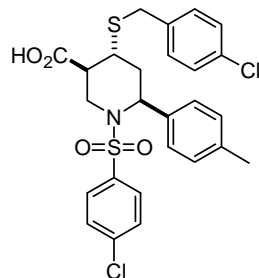

C<sub>26</sub>H<sub>25</sub>Cl<sub>2</sub>NO<sub>4</sub>S<sub>2</sub>  
Exact Mass: 549.06  
Mol. Wt.: 550.52

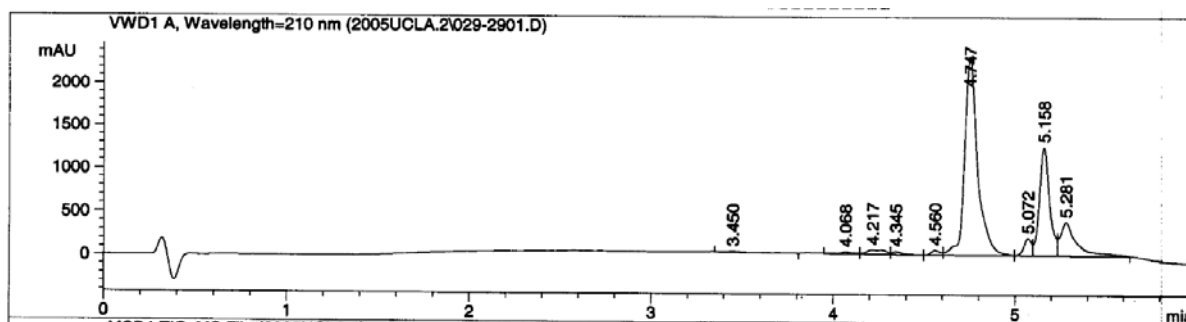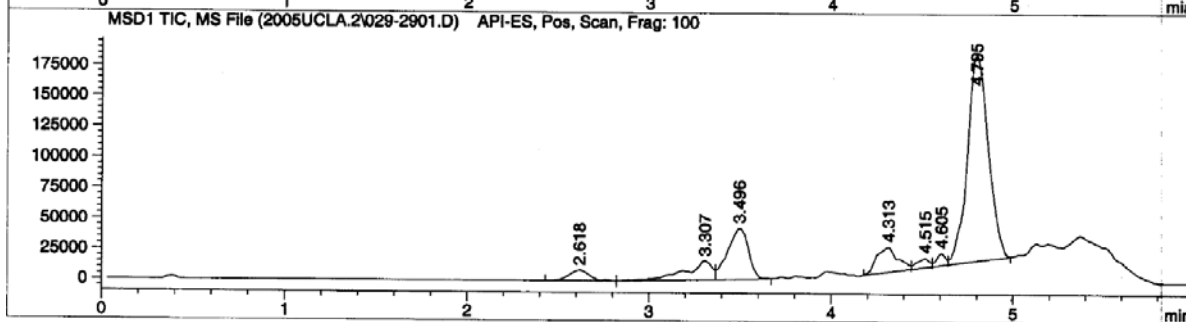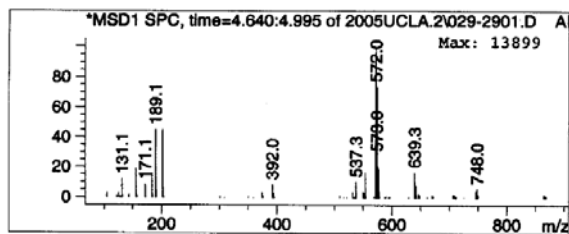

**Benzenesulfonyl-6-(4-methoxyphenyl)-4-*p*-tolylsulfanyl-piperidine-3-carboxylic acid (B01C35E02)**

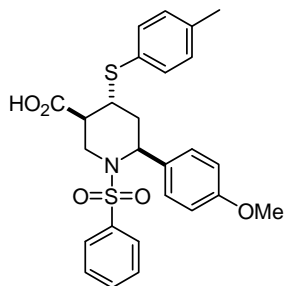

C<sub>26</sub>H<sub>27</sub>NO<sub>5</sub>S<sub>2</sub>  
Exact Mass: 497.13  
Mol. Wt.: 497.63

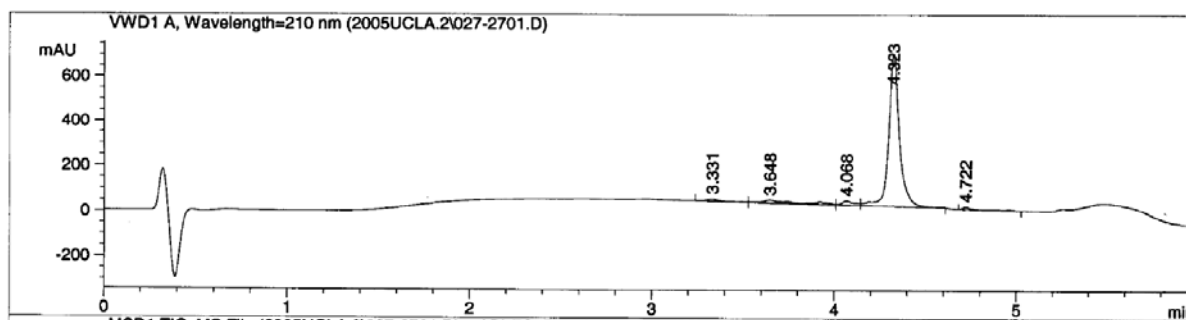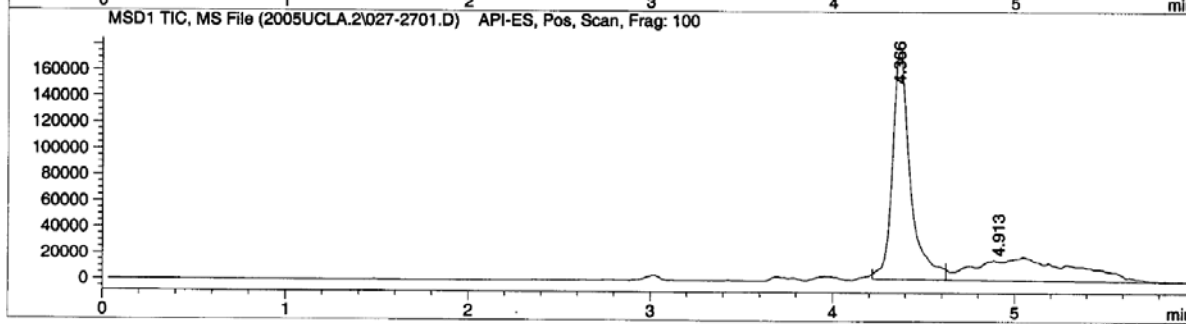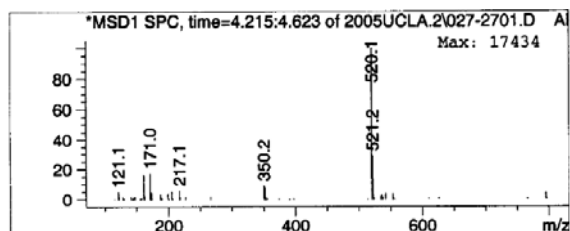

Supplement: NIHMS63737-supplement-7si20070310_06.pdf [file NIHMS63737-supplement-7si20070310_06.pdf]
