# Supplementary material
Source: PubMed Central journal article supplement (PMC2543057)
Supplement: NIHMS63737-supplement-3si20070310_06.pdf [file NIHMS63737-supplement-3si20070310_06.pdf]

## Supporting Information, Part A

### Small-Molecule Inhibitors of Protein Geranylgeranyltransferase Type I

Sabrina Castellano, Hannah D. G. Fiji, Sape S. Kinderman, Masaru Watanabe,<sup>1</sup> Pablo de Leon, Fuyuhiko Tamanoi,<sup>1</sup> and Ohyun Kwon\*

*Department of Chemistry and Biochemistry, Department of Microbiology, Immunology and Molecular Genetics, Jonsson Comprehensive Cancer Center and Molecular Biology Institute, University of California, Los Angeles, 607 Charles E. Young Drive East, Los Angeles, CA 90095-1569*  
ohyun@chem.ucla.edu

#### Contents

|                                                                                          |      |
|------------------------------------------------------------------------------------------|------|
| List of abbreviations                                                                    | S2   |
| General                                                                                  | S3   |
| Structures of 138 compounds                                                              | S4   |
| Screening the pilot library of 138 compounds                                             | S5   |
| Synthesis of 4-substituted 2,3-butadienoic acids <b>A(01–11)</b>                         | S6   |
| Chart of the 4-substituted 2,3-butadienoic acid building blocks <b>A(01–11)</b>          | S6   |
| Synthesis of 2-substituted 2,3-butadienoic acids <b>B(01–12)</b>                         | S8   |
| Chart of the 2-substituted 2,3-butadienoic acid building blocks <b>B(01–12)</b>          | S8   |
| Synthesis of <i>N</i> -sulfonylimines <b>C(01–46)</b>                                    | S12  |
| Chart of the <i>N</i> -sulfonylimine building blocks <b>C(01–46)</b>                     | S12  |
| Resin loading with 4-substituted 2,3-butadienoic acids                                   | S15  |
| Resin loading with 2-substituted 2,3-butadienoic acids                                   | S16  |
| Solid phase [3 + 2] annulations with <i>N</i> -sulfonylimines                            | S16  |
| Solid phase [4 + 2] annulations with <i>N</i> -sulfonylimines                            | S18  |
| Solid phase thiol addition to the dihydropyrrole scaffold                                | S19  |
| Chart of the thiol building blocks <b>E(01–32)</b>                                       | S19  |
| Solid phase thiol addition to the tetrahydropyridine scaffold                            | S21  |
| Screening for the selection of building blocks used in the library synthesis             | S22  |
| Experimental procedures for the library tagging and the split and pool library synthesis | S34  |
| Table of LCMS data for a random selection of library products                            | S38  |
| Bio-assays using 4288 GGTI analogs                                                       | S40  |
| <b>Part B:</b> Spectroscopic data for example derivatives                                | S43  |
| <b>Part C:</b> Spectroscopic data for the dihydropyrroles and derivatives                | S73  |
| <b>Part D:</b> Spectroscopic data for the tetrahydropyridines and derivatives            | S221 |
| <b>Part E:</b> LCMS data for a random selection of library products                      | S381 |

---

<sup>1</sup> Department of Microbiology, Immunology and Molecular Genetics

## List of Abbreviations

|                |                                                 |      |                           |
|----------------|-------------------------------------------------|------|---------------------------|
| APCI           | atmospheric pressure chemical ionization        | Ts   | <i>p</i> -toluenesulfonyl |
| Ar             | aryl                                            | 2-Ts | <i>o</i> -toluenesulfonyl |
| <i>n</i> -BuLi | <i>n</i> -butyllithium                          |      |                           |
| Bs             | benzenesulfonyl                                 |      |                           |
| Br             | bromo                                           |      |                           |
| Bu             | butyl                                           |      |                           |
| CI             | chemical ionization                             |      |                           |
| Cl             | chloro                                          |      |                           |
| 4-CIBs         | <i>p</i> -chlorobenzenesulfonyl                 |      |                           |
| calcd.         | calculated                                      |      |                           |
| CN             | cyano                                           |      |                           |
| cond.          | condition(s)                                    |      |                           |
| DCM            | dichloromethane                                 |      |                           |
| DIPEA          | diisopropylethylamine (Hünig's base)            |      |                           |
| DMF            | <i>N,N</i> -dimethylformamide                   |      |                           |
| EI             | electron ionization                             |      |                           |
| equiv          | equivalents                                     |      |                           |
| ES             | electrospray                                    |      |                           |
| Et             | ethyl                                           |      |                           |
| EtO            | ethoxy                                          |      |                           |
| F              | fluoro                                          |      |                           |
| h              | hour(s)                                         |      |                           |
| HPLC           | high-performance liquid chromatography          |      |                           |
| HRMS           | high-resolution mass spectrometry               |      |                           |
| incl.          | included                                        |      |                           |
| IR             | infrared                                        |      |                           |
| L-lantern      | L-series lantern, capacity 15 $\mu$ mol/lantern |      |                           |
| L-             | attached to L-lantern solid support             |      |                           |
| LC             | liquid chromatography                           |      |                           |
| 2-MCBs         | 2-methoxycarbonylbenzenesulfonyl                |      |                           |
| Me             | methyl                                          |      |                           |
| MeO            | methoxy                                         |      |                           |
| Ms             | methanesulfonyl                                 |      |                           |
| MS             | mass spectrometry                               |      |                           |
| nd             | not determined                                  |      |                           |
| nm             | nanometer                                       |      |                           |
| NMR            | nuclear magnetic resonance                      |      |                           |
| Ns             | <i>p</i> -nitrobenzenesulfonyl                  |      |                           |
| 2-Ns           | <i>o</i> -nitrobenzenesulfonyl                  |      |                           |
| 3-Ns           | <i>m</i> -nitrobenzenesulfonyl                  |      |                           |
| Ph             | phenyl                                          |      |                           |
| <i>i</i> -Pr   | isopropyl                                       |      |                           |
| $R_f$          | retention factor                                |      |                           |
| rt             | room temperature                                |      |                           |
| TEA            | triethylamine                                   |      |                           |
| TFA            | trifluoroacetic acid                            |      |                           |
| THF            | tetrahydrofuran                                 |      |                           |
| TLC            | thin layer chromatography                       |      |                           |
| TOF            | time of flight                                  |      |                           |

**General.** Unless otherwise noted, all chemicals were purchased from commercial suppliers and used without purification. Synphase lanterns (L-series lantern; capacity: 15  $\mu\text{mol}$ /lantern), spindles, and cogs were purchased from Mimotopes Pty. Ltd., Clayton, Australia. Prior to their first use, the lanterns were washed (3 $\times$ ) with the reaction solvent. Each washing was left to settle for at least 5 min, unless otherwise stated. The solid phase washings were performed using PA-grade solvents. For reactions, benzene and  $\text{CH}_2\text{Cl}_2$  were freshly distilled from calcium hydride. THF and diethyl ether were freshly distilled from Na using benzophenone as indicator. Triethylamine was stored over KOH pellets and used as such. All air- and moisture-sensitive reactions were performed under an inert atmosphere of dry Ar. Column chromatography was performed using EMD silica gel 60 (230–400 mesh).  $R_f$  values were obtained from thin layer chromatography (TLC) on silica gel-coated glass plates (E. Merck silica gel plates 60F-254) using the indicated solvents. Infrared spectra were recorded on a Perkin–Elmer pargon 1600 FT-IR spectrometer. NMR spectra were obtained in  $\text{CDCl}_3$  (unless otherwise noted) on a Bruker AV300, Bruker ARX 400, or Bruker DRX 500 spectrometer. Spectra are reported in units of ppm on the  $\delta$  scale, relative to chloroform (7.26 ppm for  $^1\text{H}$  NMR; 77.0 ppm for  $^{13}\text{C}$  NMR). High-resolution EI mass spectra were recorded after rapid thermal vaporization of samples deposited on a desorption ionization filament that was directly inserted into the electron ionization (EI, 70 eV, 200 $^\circ\text{C}$ ) source of a triple-sector high-resolution instrument (VG/Micromass Autospec) tuned to 8000 static resolution (M/DM, 10% valley) using perfluorinated kerosene (formula weight: 705; Lancaster Synthesis, Inc., NH) as an internal calibrant. High-resolution chemical ionization (CI) mass spectra were recorded using a Micromass GCT Gas Chromatograph EI/CI TOF spectrometer. Atmospheric pressure chemical ionization (APCI) was performed on a SCIEX II instrument equipped with an optional Applied Biosystems/MSD Sciex QSTAR-XL hybrid Quad-TOF. Uncorrected melting points were determined using an Electrothermal capillary melting point apparatus. LCMS data were obtained on an Agilent 1100 HPLC using a Phenomenex Synergi 4 $\mu$  max–RP 80 $\text{\AA}$  50  $\times$  3 mm column, an Agilent MSD single-quadrupole mass spectrometer in ESI mode, and water/acetonitrile with formic acid as co-additive as the eluent.

*Enzyme Assay.* [ $^3\text{H}$ ]Farnesyl diphosphate (FPP) and [ $^3\text{H}$ ]geranylgeranyl diphosphate (GGPP) were purchased from Perkin–Elmer. Rat FTase and GGTase-I were purchased from JENA Biosciences. GGTI298 and GGTI2166 were purchased from Calbiochem. Full-length cDNAs of K-Ras4B and RhoA were subcloned into pMAL-p2 vector (NEB) to generate MBP-tagged K-Ras4B and RhoA. The preparation of pCDNA3-mycHARheb (M184L) was described previously.<sup>2</sup> FTase and GGTase-I activities were determined using the method in which radiolabeled isoprenoid is transferred from [ $^3\text{H}$ ]FPP and [ $^3\text{H}$ ]GGPP into a substrate protein. In brief, FTase or GGTase-I (50 ng) were used to initiate reactions containing 50.0 mM Tris-HCl (pH 7.5), 10.0 mM  $\text{MgCl}_2$ , 50.0  $\mu\text{M}$   $\text{ZnCl}_2$ , 1.0 mM DTT, 0.1  $\mu\text{M}$  [ $^3\text{H}$ ]FPP or [ $^3\text{H}$ ]GGPP, 50.0 ng GGTase-I, and a concentration of 0.25  $\mu\text{M}$  of appropriately purified MBP-tagged protein substrates (K-Ras4B for FTase; RhoA and K-Ras4B for GGTase-I). The final DMSO concentration was 5% for each sample. Reactions were performed for 30 min at 37  $^\circ\text{C}$ , after which time the reaction mixtures were added onto a piece of Whatmann 3 filter paper. Filters were fixed twice with 10% trichloroacetic acid (TCA) for 10 min and then washed twice with ethanol and acetone for 5 min, respectively. After drying, the filters were mixed with scintillation fluid (2 mL) and counted in a Beckman LS6500 scintillation counter.

*Protein Processing Assay.* Human embryonic kidney (HEK293) cells were maintained in Dulbecco's modified Eagle's medium (DMEM; Invitrogen) supplemented with 10% (vol/vol) heat-inactivated fetal bovine serum, penicillin (100 IU  $\text{mL}^{-1}$ ), and streptomycin (100  $\mu\text{g}$   $\text{mL}^{-1}$ ). Cells were transfected using Polyfect (Qiagen) according to the manufacturer's instructions. In brief, the plasmid DNA was incubated in serum-free media with the Polyfect reagent for 10 min, diluted in serum-free media, and added to the cells with fresh media. After 24 h of transfection, the cells were treated with DMSO or our GGTIs, GGTI-298, and GGTI-2166 for 48 h. The cells were then harvested and lysed in lysis buffer: 150 mM NaCl, 50 mM Tris-HCl (pH 8.0), 1% SDS, 1% NP-40, and 1x Protease Inhibitor Mixture (Roche Applied Science). The lysates were electrophoresed using a 10% SDS-PAGE system, transferred to nitrocellulose membranes, and immunoblotted with anti-Rheb antibody (GenWay).

---

<sup>2</sup> Gau, C. L.; Kato-Stankiewicz, J.; Jiang, C.; Miyamoto, S.; Guo, L.; Tamanoi, F. *Mol. Cancer Ther.* **2005**, *4*, 918.

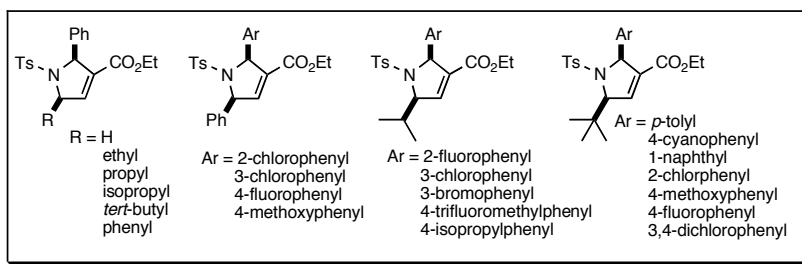

### dihydropyrroles synthesized in solution

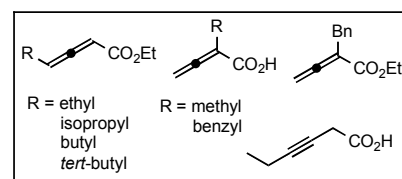

### Allenes

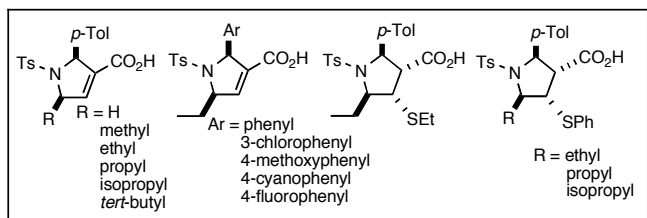

### pyrrolines/pyrrolidines synthesized on solid support

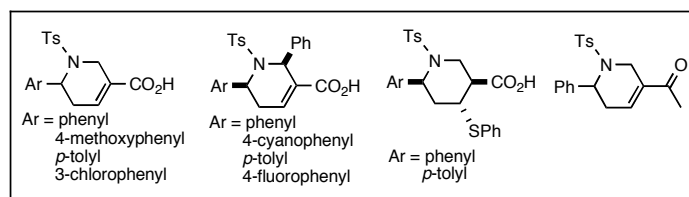

### (didehydro)piperidines synthesized on solid phase

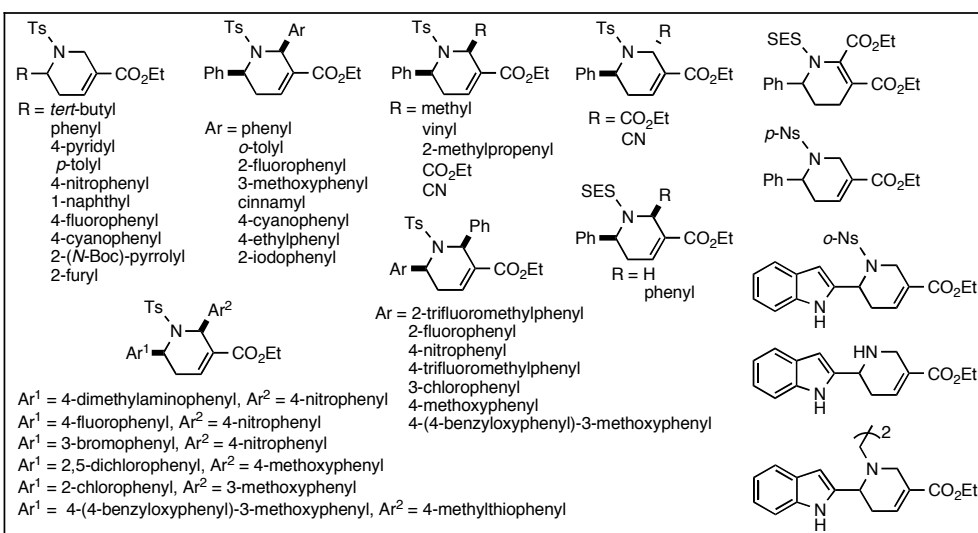

### tetrahydropyridines synthesized in solution

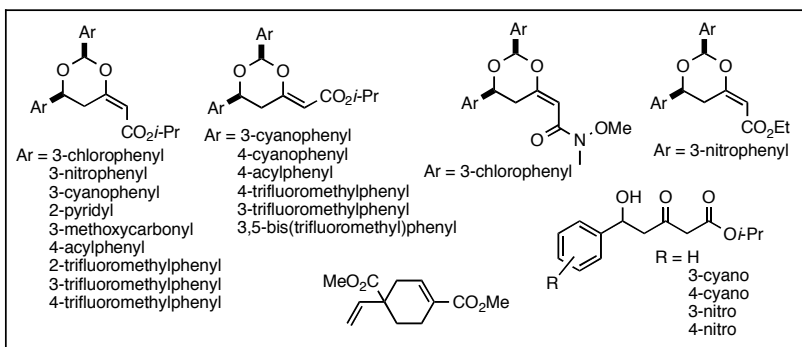

### small molecules from dioxanolidene project

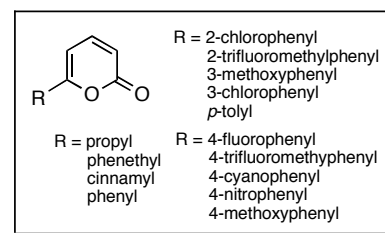

### 2-pyrone

Figure S1. Structures of 138 compounds screened against GGTase I.

## Screening the Pilot Library of 138 Compounds

**Filter Binding Assays to Identify the Initial Protein Geranylgeranyltransferase Type I Inhibitors.** The pilot library (Figure S1) was screened for inhibitors of protein geranylgeranyltransferase type I (GGTase I). Protein prenyltransferase assays were performed through filter binding.<sup>3</sup> Two different substrates, RhoA and K-Ras4B, were used for the assay. RhoA ends with the CaaL motif and is an exclusive substrate for GGTase I, while K-Ras4B ends with the CaaX motif and is modified by both GGTase I and protein farnesyltransferase (FTase). The presence of a polybasic domain consisting of a stretch of lysine residues close to the CaaX motif enables this CaaX motif to be recognized by GGTase I. Thus, RhoA and K-Ras4B are two very different substrates for this enzyme. Screening of the 138-compound pilot library resulted in the identification of the two groups of compounds presented in Figure S2. In the assay, we used a fixed concentration of 100  $\mu$ M for the small molecules; the results are plotted for the inhibition of RhoA (vertical axis) as well as for K-Ras4B (horizontal axis).

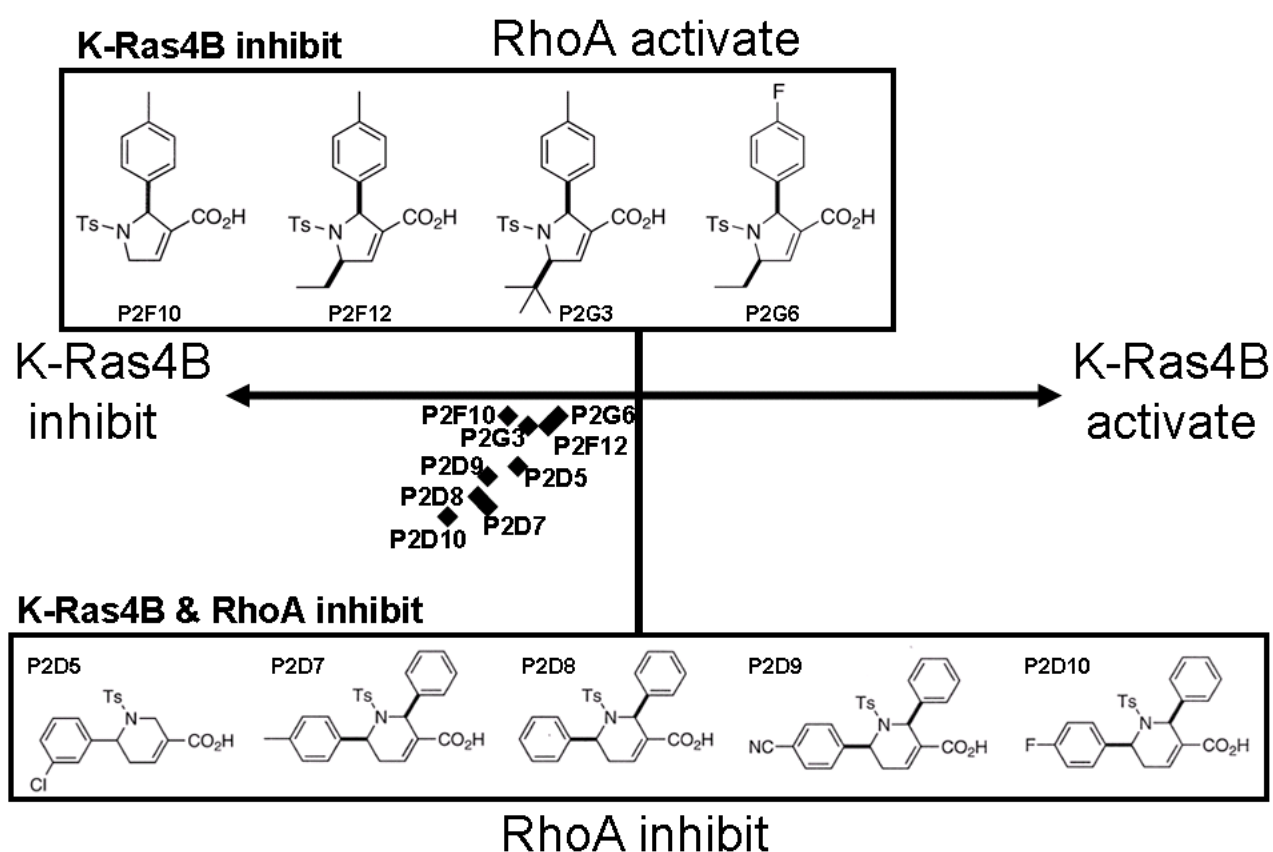

**Figure S2.** Impact of GGTIs on the GGTase-I activity, and their structures.

To determine  $IC_{50}$  values, the percentage activity of GGTase I was measured in the presence of the inhibitors of GGTase I (GGTIs) at various concentrations. Figure S3 displays dose–response curves for compounds **1** (P2G6) and **2** (P2D10).

<sup>3</sup> Finegold, A. A.; Johnson, D. I.; Farnsworth, C. C.; Gelb, M. H.; Judd, S. R.; Glomset, J. A.; Tamanoi, F. *Proc. Natl. Acad. Sci., USA* **1991**, *88*, 4448.

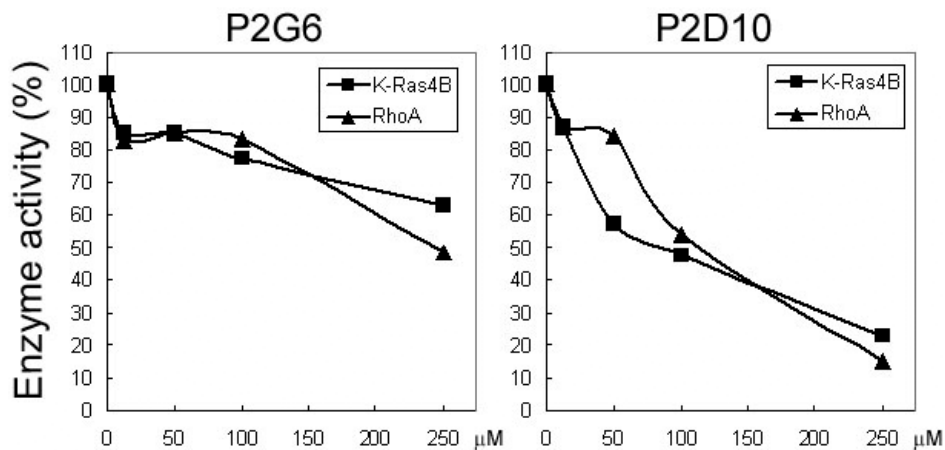

**Figure S3.** Dose dependency of GGTase-I activity in the presence of compound **1** or **2**.

### Synthesis of 4-Substituted 2,3-Butadienoic Acids A(01–11)

**Chart 1.** 4-Substituted 2,3-butadienoic acid building blocks A(01–11).

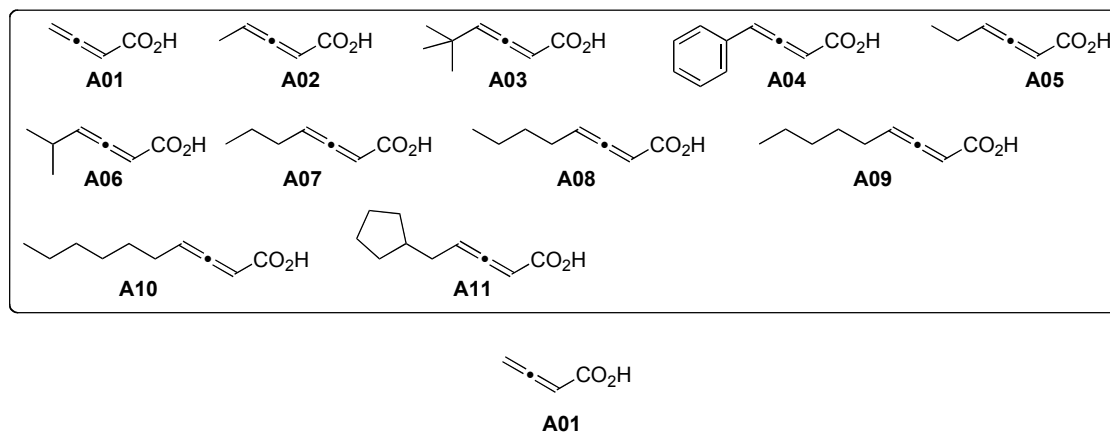

**2,3-Butadienoic Acid (A01).** 2,3-Butadienoic acid was synthesized from 3-butyn-1-ol through Jones oxidation and subsequent isomerization according to a literature procedure.<sup>4</sup> Later, we found out that the Jones oxidation product, 3-butynoic acid, could be used directly for coupling to the benzyl alcohol units of Wang resin, resulting in the resin-bound allenoate. Presumably the initial 3-butynoate product was isomerized to the allenoate under the coupling reaction conditions. Subsequently, we employed a mixture of an allenic acid and the isomeric alkynoic acid in the formation of resin-bound allenoates (vide infra).

**4-Alkyl-2,3-butadienoic Acids A(02–11).** Most of the 4-alkyl-2,3-butadienoic acids A(02–11) and their ethyl esters are known in literature,<sup>5</sup> except for A05 and A11. These 4-alkyl-butadienoic acids were synthesized according to the procedures described below.

4. For Jones oxidation, see: (a) Bowden, K.; Heilbron, I. M.; Jones, E. R. H.; Weedon, B. C. L. *J. Chem. Soc.* **1946**, 39. (b) Heilbron, I.; Jones, R. H.; Sondheimer, F. *J. Chem. Soc.* **1949**, 604. For isomerization, see: (c) Egliton, G.; Jones, E. R. H.; Mansfield, G. H.; Whiting, M. C. *J. Chem. Soc.* **1954**, 3197.

5. For ethyl esters, see: (a) Lang, R. W.; Hansen, H.-J. *Helv. Chim. Acta* **1980**, *63*, 438. (b) Tsuboi, S.; Kuroda; Takatsura, S.; Fukawa, T.; Sakai, T.; Utaka, M. *J. Org. Chem.* **1993**, *58*, 5952. (c) Gandhi, R. P.; Ishar, M. P. S. Wali, A. *Tetrahedron Lett.* **1987**, *28*, 6679. (d) Dieter, R. K.; Lu, K. *Tetrahedron Lett.* **1999**, *40*, 4011. (e) Nishibayashi, Y.; Singh, J. D.; Fukuzawa, S.; Uemura, S. *J. Org. Chem.* **1995**, *60*, 4114. (f) Ahmar, M.; Chabanis, O.; Gauthier, J.; Cazes, B. *Tetrahedron Lett.* **1997**, *38*, 5277. (g) Bestmann, H. J.; Hartung, H. *Angew. Chem., Int. Ed. Engl.* **1963**, *2*, 214. (h) Ramaswamy, S.; Hui, R. A. H. F.; Jones, J. B. *J. Chem. Soc., Chem. Commun.* **1986**, 1545. (i) Lang, R. W.; Hansen, H.-J. *Org. Synth. Coll. Vol. 7*, **1990**, 232. For acids, see: (j) Jones, E. R. H.; Whitham, G. H.; Whiting, M. C. *J. Chem. Soc.* **1954**, 3201. (k) Ma, S.-M.; Shi, Z.-J. *Chin. J. Chem.* **2001**, *19*, 1280. (l) Pansard, J.; Gaudemar, M. *Bull. Soc. Chim. Fr.* **1968**, *8*, 3332. (m) Gill, G. B.; Idris, M. S. H.; Kirolos, K. S.

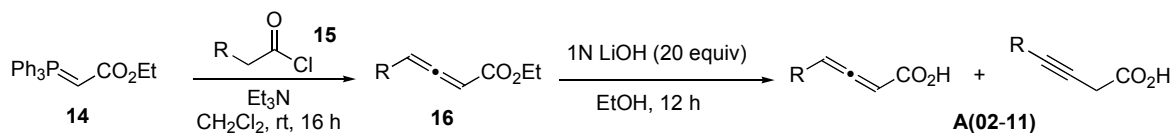

**General Procedure.** Et<sub>3</sub>N (63 mmol, 1.1 equiv) was added to a stirred solution of (carbethoxymethylene)triphenylphosphorane (57.5 mmol, 1 equiv) in CH<sub>2</sub>Cl<sub>2</sub> (200 mL). After stirring for 10 min, the required acyl chloride (57.5 mmol, 1 equiv) was added dropwise over 30 min at room temperature. After stirring overnight, the resulting mixture was poured onto a Büchner funnel packed with silica gel and was washed with CH<sub>2</sub>Cl<sub>2</sub> several times. The combined filtrate was carefully concentrated and the resulting crude oil was purified by flash column chromatography (hexane/EtOAc, 20:1) to provide the 4-substituted 2,3-butadienoates. For the hydrolysis, a round-bottom flask was charged with the 4-substituted 2,3-butadienoate in EtOH (10 mL/g of ester). LiOH (1 N aqueous solution, 20 equiv) was added over a period of 5 min at room temperature. The reaction mixture was stirred overnight at room temperature. The products were extracted with CH<sub>2</sub>Cl<sub>2</sub> (3 × 50 mL) and the combined extracts dried (Na<sub>2</sub>SO<sub>4</sub>) and concentrated to afford a mixture of allenoic and alkynoic acids. This crude mixture of allenoic and alkynoic acids was used for loading to obtain the resin-bound  $\gamma$ -substituted allenoates. The reaction yields and literature references for the allenoates and their hydrolysis products are listed in Tables 1 and 2. Spectroscopic data of ethyl 4-cyclopentylmethyl-2,3-butadienoate and its hydrolysis product are also provided.

**Table 1.** Synthesized 4-Substituted 2,3-Butadienoic Acid Ethyl Esters **Et-A(01–11)**.

| Entry | Allenoate     | R                  | Yield (%) | Reference                                                |
|-------|---------------|--------------------|-----------|----------------------------------------------------------|
| 1     | <b>Et-A02</b> | methyl             | –         | <i>Helv. Chim. Acta</i> <b>1980</b> , 63, 438            |
| 2     | <b>Et-A03</b> | <i>tert</i> -butyl | 75        | <i>Helv. Chim. Acta</i> <b>1980</b> , 63, 438            |
| 3     | <b>Et-A04</b> | phenyl             | 53        | <i>J. Org. Chem.</i> <b>1993</b> , 58, 5952              |
| 4     | <b>Et-A05</b> | ethyl              | 100       | <i>Tetrahedron Lett.</i> <b>1987</b> , 28, 6679          |
| 5     | <b>Et-A06</b> | isopropyl          | 74        | <i>Tetrahedron Lett.</i> <b>1999</b> , 40, 4011          |
| 6     | <b>Et-A07</b> | <i>n</i> -propyl   | 74        | <i>J. Org. Chem.</i> <b>1995</b> , 60, 4114              |
| 7     | <b>Et-A08</b> | <i>n</i> -butyl    | 86        | <i>Tetrahedron Lett.</i> <b>1997</b> , 38, 5277          |
| 8     | <b>Et-A09</b> | <i>n</i> -pentyl   | 75        | <i>Angew. Chem., Int. Ed. Engl.</i> <b>1963</b> , 2, 214 |
| 9     | <b>Et-A10</b> | <i>n</i> -hexyl    | 84        | <i>J. Chem. Soc., Chem. Commun.</i> <b>1986</b> , 1545   |
| 10    | <b>Et-A11</b> | cyclopentylmethyl  | 55        | Unknown in the literature                                |

**Table 2.** Hydrolyses of 4-Substituted 2,3-Butadienoic Acid Ethyl Esters **Et-A(01–11)**.

| Entry | Acid       | R                  | Yield (%) | Ratio Allenoic/alkynoic acid | Reference                                               |
|-------|------------|--------------------|-----------|------------------------------|---------------------------------------------------------|
| 1     | <b>A02</b> | methyl             | 91        | 1:2.9                        | <i>J. Chem. Soc.</i> <b>1954</b> , 3201                 |
| 2     | <b>A03</b> | <i>tert</i> -butyl | 96–100    | 2.7:1                        | <i>Chin. J. Chem.</i> <b>2001</b> , 19, 1280            |
| 3     | <b>A04</b> | phenyl             | 80–100    | 2.7:1                        | <i>J. Chem. Soc., Chem. Commun.</i> <b>1986</b> , 1545  |
| 4     | <b>A05</b> | ethyl              | 96–98     | 1:1.2                        | Unknown in the literature                               |
| 5     | <b>A06</b> | isopropyl          | 98–100    | 1.4:1                        | <i>Bull. Soc. Chim. Fr.</i> <b>1968</b> , 8, 3332       |
| 6     | <b>A07</b> | <i>n</i> -propyl   | 98–100    | 1.1:1                        | <i>J. Chem. Soc., Perkin Trans 1</i> <b>1992</b> , 2367 |
| 7     | <b>A08</b> | <i>n</i> -butyl    | 95–100    | 1:1.8                        | <i>Tetrahedron Lett.</i> <b>1999</b> , 40, 2393         |
| 8     | <b>A09</b> | <i>n</i> -pentyl   | 95–98     | 1:2.1                        | <i>Synthesis</i> <b>1981</b> , 875                      |
| 9     | <b>A10</b> | <i>n</i> -hexyl    | 95–98     | 1:1.5                        | <i>J. Am. Chem. Soc.</i> <b>1985</b> , 107, 6046        |
| 10    | <b>A11</b> | cyclopentylmethyl  | 90–100    | 1:3.6                        | Unknown in the literature                               |

*J. Chem. Soc., Perkin Trans 1* **1992**, 2367. (n) Ma, S.; Shi, Z.; Yu, Z. *Tetrahedron Lett.* **1999**, 40, 2393. (o) Clinet, J.-C.; Linstrumelle, G. *Synthesis* **1981**, 875. (p) Schwab, J. M.; Lin, D. C. T. *J. Am. Chem. Soc.* **1985**, 107, 6046.

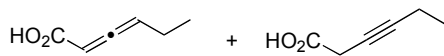

**A5**

**4-Ethylbuta-2,3-dienoic Acid and Hex-3-ynoic Acid (A05).** According to the general procedure (90 mmol scale), a mixture of 4-ethylbuta-2,3-dienoic acid and hex-3-ynoic acid was obtained as a light-yellow oil. Yield: 13.5 g (88 mmol, 98%). IR (neat)  $\nu$  3400–2500, 2976, 1956, 1716  $\text{cm}^{-1}$ ;  $^1\text{H}$  NMR (500 MHz,  $\text{CDCl}_3$ )  $\delta$  11.43 (s, 1H), 5.67 (q,  $J$  = 6.25 Hz, 1H), 5.44 (dt,  $J$  = 6.25, 3.52 Hz, 1H), 3.24 (t,  $J$  = 2.40, 2H), 2.15–2.07 (m, 5H), 1.04 (t,  $J$  = 7.55, 3H), 1.00 (t,  $J$  = 7.40, 3H);  $^{13}\text{C}$  NMR (125 MHz,  $\text{CDCl}_3$ )  $\delta$  213.4, 175.3, 172.4, 97.3, 88.2, 85.4, 69.9, 25.6, 20.4, 13.5, 12.7, 12.1; GCMS (Agilent) calcd. for  $\text{C}_6\text{H}_8\text{O}_2$  [ $\text{M}^+$ ] 112.05, found 112.10.

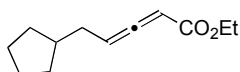

**Et-A11**

**5-Cyclopentyl-2,3-pentadienoic Acid Ethyl Ester (Et-A11).** The title compound was prepared in accordance with the general procedure described above (163 mmol scale), and was obtained in 55% yield as a yellow oil. IR (neat)  $\nu$  2948, 2868, 1716, 1039  $\text{cm}^{-1}$ ;  $^1\text{H}$  NMR (300 MHz,  $\text{CDCl}_3$ )  $\delta$  7.21 (d,  $J$  = 3.90 Hz, 1H), 7.16 (d,  $J$  = 6.9 Hz 1H), 5.61–5.53 (m, 2H), 4.23–4.12 (m, 2H), 2.02–1.90 (m, 1H), 1.84–1.76 (m, 2H), 1.64–1.49 (m, 2H), 1.29 (t,  $J$  = 7.46 Hz, 3H);  $^{13}\text{C}$  NMR (125 MHz,  $\text{CDCl}_3$ )  $\delta$  212.7, 166.4, 94.6, 87.8, 60.7, 39.5, 33.9, 32.3, 25.3, 14.3; HRMS (EI) calcd. for  $\text{C}_{12}\text{H}_{19}\text{O}_2$  [ $\text{M} + \text{H}$ ] $^+$  195.1388, found 195.1376.

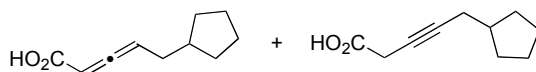

**A11**

**5-Cyclopentyl-2,3-pentadienoic Acid and 5-Cyclopentyl-3-pentynoic Acid (A11).** According to the general procedure (90 mmol scale), a mixture of 5-cyclopentylpenta-2,3-dienoic acid and 5-cyclopentylpent-3-ynoic acid was obtained as a light-yellow oil. Upon distillation of the crude mixture, 13.5 g (81 mmol, 90%) of the acids were obtained. IR (neat)  $\nu$  2950, 1717  $\text{cm}^{-1}$ ;  $^1\text{H}$  NMR (300 MHz,  $\text{CDCl}_3$ )  $\delta$  7.21 (d,  $J$  = 3.90 Hz, 1H), 7.16 (d,  $J$  = 6.9 Hz 1H), 5.61–5.53 (m, 2H), 4.23–4.12 (m, 2H), 2.02–1.90 (m, 1H), 1.84–1.76 (m, 2H), 1.64–1.49 (m, 2H), 1.29 (t,  $J$  = 7.46 Hz, 3H);  $^{13}\text{C}$  NMR (125 MHz,  $\text{CDCl}_3$ )  $\delta$  213.9, 175.2, 172.3, 94.9, 87.2, 83.8, 70.5, 39.3, 38.9, 33.6, 32.1, 31.8, 25.8, 25.1, 25.1, 24.3; HRMS (ESI negative-ion mode) calcd. for  $\text{C}_{10}\text{H}_{13}\text{O}_2$  [ $\text{M} - \text{H}$ ] $^-$  165.0928, found 165.0921.

## Synthesis of 2-Substituted 2,3-Butadienoic Acids B(01–12)

**Chart 2.** 2-Substituted 2,3-butadienoic acid building blocks B(01–12)

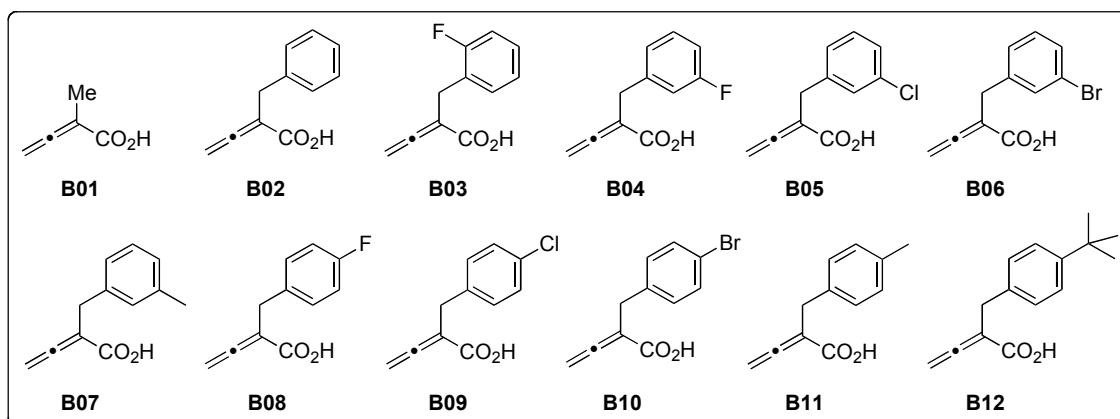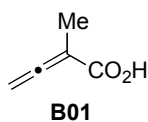



**2-Methyl-2,3-butadienoic Acid (B01).** 2-Methyl-2,3-butadienoic acid was synthesized following a (slightly modified) literature procedure.<sup>6</sup>

**2-Benzyl-2,3-butadienoic Acids B(02–12).** All  $\alpha$ -benzyl allenic acids were synthesized according to the general procedure below, which is a combination of (slightly modified) literature procedures.<sup>7</sup>

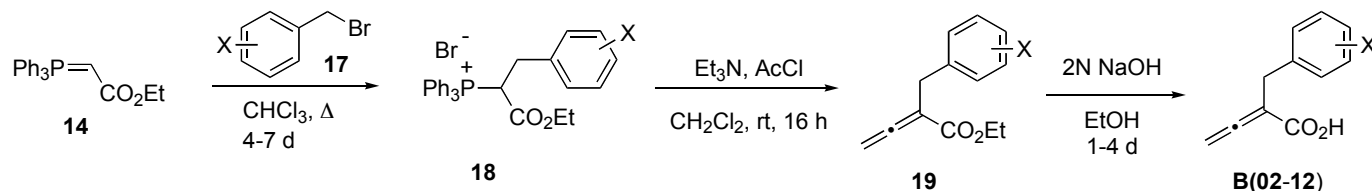

*General Procedure.* A solution of (carbethoxymethylene)triphenylphosphorane (80 g, 230 mmol) and the benzyl bromide (250 mmol, 1.1 equiv) in  $\text{CHCl}_3$  (500 mL) was heated under reflux for 4–7 days until TLC (hexanes/EtOAc, 2:1) indicated the complete disappearance of the phosphorane. The mixture was concentrated and the crude oily foam was co-evaporated with  $\text{CH}_2\text{Cl}_2$  ( $2 \times 100$  mL). The resultant crude phosphonium salt was dissolved in  $\text{CH}_2\text{Cl}_2$  (500 mL) and  $\text{Et}_3\text{N}$  (64 mL, 460 mmol, 2 equiv) was added, followed by stirring for 30 min.  $\text{AcCl}$  (16.35 mL, 230 mmol, 1 equiv) was then slowly added over 30 min with vigorous stirring. The resultant suspension was stirred for 16 h and concentrated. The thick slurry was stirred with  $\text{Et}_2\text{O}$  (300 mL) for 2 h and then filtered over a pad of silica gel. The residue on the filter was washed with  $\text{Et}_2\text{O}$  ( $3 \times 100$  mL) and the combined organic fractions were concentrated. Column chromatography of the crude oil (hexanes/ $\text{Et}_2\text{O}$ , 40:1–20:1) afforded the pure allenates. 2 N Aqueous NaOH (1L, 2 mol, 20 equiv) was added to a solution of the allenate (100 mmol) in EtOH (50 mL) and stirred at the indicated temperature for 24–96 h until TLC (hexanes/EtOAc, 2:1) indicated complete hydrolysis. The solution was carefully acidified to ca. pH 1 using 6 N HCl and the product was then extracted with  $\text{Et}_2\text{O}$  ( $4 \times 125$  mL). The combined extracts were dried ( $\text{Na}_2\text{SO}_4$ ) and concentrated. When necessary, column chromatography (hexanes/EtOAc, 8:1–0:1) afforded the pure butadienoic acid, often as a white solid.

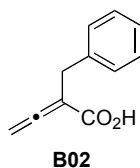

**2-Benzyl-2,3-butadienoic Acid (B02).**<sup>7c</sup> According to the general procedure (230 mmol scale), ethyl 2-benzyl-2,3-butadienoate (25.6 g, 127 mmol, 55%) was obtained as a colorless oil. The allenate (25.6 g, 127 mmol) was hydrolyzed at room temperature to afford 2-benzylbuta-2,3-dienoic acid (18.0 g, 104 mmol, 82%) as a white solid. All spectroscopic data were in accordance with those reported in the literature.<sup>7c</sup>

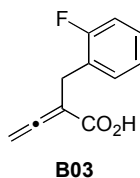

**2-(2-Fluorobenzyl)-2,3-butadienoic Acid (B03).** According to the general procedure (86.1 mmol scale), ethyl 2-(2-fluorobenzyl)-buta-2,3-dienoate (10.1 g, 45.8 mmol, 53%) was obtained as a colorless oil. The allenate (7.6 g, 34.7 mmol) was hydrolyzed at room temperature to give 2-(2-fluorobenzyl)-2,3-butadienoic acid (5.55 g, 28.9 mmol, 83%) as a white solid after column chromatography. IR (film)  $\nu$  2990, 1964, 1682, 1586, 1494, 1419, 1294, 1227, 1071, 911, 858, 783  $\text{cm}^{-1}$ ;  $^1\text{H}$  NMR (400 MHz,  $\text{CDCl}_3$ )  $\delta$  7.24–7.19 (m, 2H), 7.08–7.00 (m, 2H), 5.15 (t,  $J = 2.8$  Hz, 2H), 3.59 (t,  $J = 2.6$  Hz, 2H);  $^{13}\text{C}$  NMR (125 MHz,  $\text{CDCl}_3$ )  $\delta$  215.1, 172.1, 161.1 (d,  $J = 246.2$  Hz), 131.0 (d,  $J = 4.4$

6. Harvey, G. R.; Ratts, K. W. *J. Org. Chem.* **1966**, *31*, 3907.

7. For the Wittig reaction, see: (a) Ref. 5a. For the hydrolysis, see: (b) Bestmann, H.-J.; Hartung, H. *Chem. Ber.* **1966**, *99*, 1198. (c) Himbert, G.; Juergen, H. *Zeitschrift für Naturforschung, B: Chemical Sciences* **1992**, *47*, 1785.

Hz), 128.2 (d,  $J = 8.3$  Hz), 125.2 (d,  $J = 15.3$  Hz), 123.7 (d,  $J = 3.3$  Hz), 115.1 (d,  $J = 21.9$  Hz), 98.6, 79.8, 27.8 (d,  $J = 2.5$  Hz); HRMS (EI) calcd. for  $C_{11}H_9O_2F$  [ $M^+$ ] 192.0587, found 192.0594.

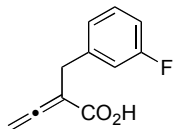

**B04**

**2-(3-Fluorobenzyl)-2,3-butadienoic Acid (B04).** Following the general procedure (86.1 mmol scale), ethyl 2-(3-fluorobenzyl)-2,3-butadienoate (10.5 g, 47.6 mmol, 55%) was obtained as a colorless oil. The allenoate (8.0 g, 36.3 mmol) was hydrolyzed at room temperature to give 2-(3-fluorobenzyl)-buta-2,3-dienoic acid (6.04 g, 31.4 mmol, 87%) as a white solid. IR (film)  $\nu$  2994, 1963, 1693, 1589, 1486, 1420, 1303, 1277, 1097, 931, 860, 787, 694  $cm^{-1}$ ;  $^1H$  NMR (400 MHz,  $CDCl_3$ )  $\delta$  7.25–7.21 (m, 1H), 7.00 (d,  $J = 7.7$  Hz, 1H), 6.96–6.90 (m, 2H), 5.21 (t,  $J = 2.4$  Hz, 2H), 3.54 (t,  $J = 2.4$  Hz, 2H);  $^{13}C$  NMR (125 MHz,  $CDCl_3$ )  $\delta$  215.3, 172.2, 162.7 (d,  $J = 245.3$  Hz), 141.1 (d,  $J = 7.4$  Hz), 129.6 (d,  $J = 8.3$  Hz), 124.4, 115.6 (d,  $J = 21.4$  Hz), 113.3 (d,  $J = 20.9$  Hz), 99.2, 79.7, 34.1; HRMS (EI) calcd. for  $C_{11}H_9O_2F$  [ $M^+$ ] 192.0587, found 192.0588.

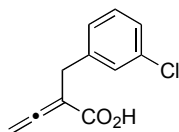

**B05**

**2-(3-Chlorobenzyl)-2,3-butadienoic Acid (B05).** Following the general procedure (48.8 mmol scale), ethyl 2-(3-chlorobenzyl)-2,3-butadienoate (18.14 g, 76.6 mmol, 55%) was obtained as a slightly yellow oil. The allenoate (18 g, 76.0 mmol) was hydrolyzed at room temperature to provide 2-(3-chlorobenzyl)-2,3-butadienoic acid (14.9 g, 71.4 mmol, 94%) as a white solid. IR (film)  $\nu$  2991, 1965, 1931, 1692, 1593, 1422, 1304, 1277, 1183, 1100, 915, 858, 785, 694  $cm^{-1}$ ;  $^1H$  NMR (500 MHz,  $CDCl_3$ )  $\delta$  7.24–7.18 (m, 3H), 7.13–7.11 (m, 1H), 5.21 (t,  $J = 2.4$  Hz, 2H), 3.52 (t,  $J = 2.3$  Hz, 2H);  $^{13}C$  NMR (125 MHz,  $CDCl_3$ )  $\delta$  215.4, 172.2, 140.6, 134.0, 129.5, 128.8, 126.9, 126.6, 99.2, 79.8, 34.0; HRMS (EI) calcd. for  $C_{11}H_9O_2Cl$  [ $M^+$ ] 208.0291, found 208.0286.

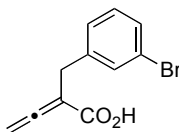

**B06**

**2-(3-Bromobenzyl)-2,3-butadienoic Acid (B06).** Following the general procedure (86.1 mmol scale), ethyl 2-(3-bromobenzyl)-2,3-butadienoate (10.9 g, 38.6 mmol, 45%) was obtained as a slightly yellow oil. The allenoate (9.2 g, 32.7 mmol) was hydrolyzed at room temperature to afford 2-(3-bromobenzyl)-2,3-butadienoic acid (7.4 g, 29.2 mmol, 89%) as an off-white solid. IR (film)  $\nu$  2987, 2677, 1965, 1932, 1692, 1590, 1471, 1427, 1304, 1277, 1100, 915, 857, 785, 693  $cm^{-1}$ ;  $^1H$  NMR (500 MHz,  $CDCl_3$ )  $\delta$  7.38–7.32 (m, 2H), 7.16–7.11 (m, 2H), 5.22 (s, 2H), 3.56 (s, 2H);  $^{13}C$  NMR (125 MHz,  $CDCl_3$ )  $\delta$  215.4, 172.2, 140.9, 131.7, 129.8, 129.6, 127.4, 122.2, 99.2, 79.8, 34.0; HRMS (EI) calcd. for  $C_{11}H_9O_2Br$  [ $M^+$ ] 253.9765, found 253.9756.

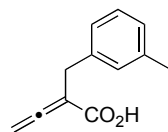

**B07**

**2-(3-Methylbenzyl)-2,3-butadienoic Acid (B07).** Following the general procedure (97.6 mmol scale), ethyl 2-(3-methylbenzyl)-2,3-butadienoate (11.16 g, 51.6 mmol, 53%) was obtained as a slightly yellow oil. The allenoate (7.3 g, 33.8 mmol) was hydrolyzed at 100 °C to give 2-(3-methylbenzyl)-2,3-butadienoic acid (4.6 g, 24.4 mmol, 72%) as a white solid after column chromatography. IR (film)  $\nu$  3419, 3020, 1963, 1683, 1415, 1283, 850, 702  $cm^{-1}$ ;  $^1H$  NMR (400 MHz,  $CDCl_3$ )  $\delta$  7.19–7.15 (m, 1H), 7.04–7.01 (m, 3H), 5.18 (t,  $J = 2.4$  Hz, 2H), 3.52 (t,  $J = 2.2$  Hz, 2H),

2.33 (s, 3H);  $^{13}\text{C}$  NMR (125 MHz,  $\text{CDCl}_3$ )  $\delta$  215.4, 172.0, 138.5, 137.8, 129.4, 128.1, 127.1, 125.7, 99.7, 79.4, 34.3, 21.3; HRMS (EI) calcd. for  $\text{C}_{12}\text{H}_{12}\text{O}_2$  [ $\text{M}^+$ ] 188.0837, found 188.0846.

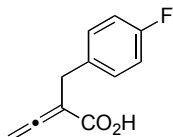

**B08**

**2-(4-Fluorobenzyl)-2,3-butadienoic Acid (B08).** Following the general procedure (86.1 mmol scale), ethyl 2-(4-fluorobenzyl)-2,3-butadienoate (9.9 g, 45 mmol, 52%) was obtained as a slightly yellow oil. The allenolate (8.2 g, 37.2 mmol) was hydrolyzed at room temperature to afford 2-(4-fluorobenzyl)-2,3-butadienoic acid (6.9 g, 35.8 mmol, 96%) as a white solid. IR (film)  $\nu$  2988, 1935, 1694, 1507, 1420, 1305, 1283, 1213, 859, 667  $\text{cm}^{-1}$ ;  $^1\text{H}$  NMR (400 MHz,  $\text{CDCl}_3$ )  $\delta$  7.20–7.16 (m, 2H), 6.98–6.93 (m, 2H), 5.18 (t,  $J = 2.5$  Hz, 2H), 3.51 (t,  $J = 2.4$  Hz, 2H);  $^{13}\text{C}$  NMR (125 MHz,  $\text{CDCl}_3$ )  $\delta$  215.2, 171.5, 161.5 (d,  $J = 244.4$  Hz), 134.2, 130.2 (d,  $J = 7.9$  Hz), 115.0 (d,  $J = 21.4$  Hz), 99.7, 79.6, 33.6; HRMS (EI) calcd. for  $\text{C}_{11}\text{H}_9\text{O}_2\text{F}$  [ $\text{M}^+$ ] 192.0587, found 192.0592.

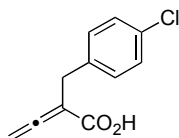

**B09**

**2-(4-Chlorobenzyl)-2,3-butadienoic Acid (B09).** Following the general procedure (230 mmol scale), ethyl 2-(4-chlorobenzyl)-2,3-butadienoate (28.3 g, 119.5 mmol, 52%) was obtained as a slightly yellow oil. The allenolate (23.0 g, 97 mmol) was hydrolyzed at room temperature to give 2-(4-chlorobenzyl)-2,3-butadienoic acid (19.0 g, 91 mmol, 94%) as an off-white solid. IR (film)  $\nu$  2982, 1932, 1691, 1492, 1421, 1303, 1277, 1087, 1013, 858  $\text{cm}^{-1}$ ;  $^1\text{H}$  NMR (500 MHz,  $\text{CDCl}_3$ )  $\delta$  7.24 (d,  $J = 8.4$  Hz, 2H), 7.16 (d,  $J = 8.4$  Hz, 2H), 5.19 (t,  $J = 2.5$  Hz, 2H), 3.51 (t,  $J = 2.4$  Hz, 2H);  $^{13}\text{C}$  NMR (125 MHz,  $\text{CDCl}_3$ )  $\delta$  215.2, 171.7, 137.0, 132.2, 130.1, 128.3, 99.4, 79.7, 33.8; HRMS (EI) calcd. for  $\text{C}_{11}\text{H}_9\text{O}_2\text{Cl}$  [ $\text{M}^+$ ] 208.0291, found 208.0285.

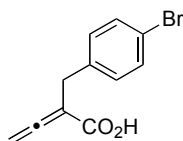

**B10**

**2-(4-Bromobenzyl)-2,3-butadienoic Acid (B10).** Following the general procedure (230 mmol scale), ethyl 2-(4-bromobenzyl)-2,3-butadienoate (32.5 g, 115.7 mmol, 50%) was obtained as a slightly yellow oil. The allenolate (26.0 g, 92.5 mmol) was hydrolyzed at room temperature to give 2-(4-bromobenzyl)-2,3-butadienoic acid (24.1 g, 95 mmol, 100%) as an off-white solid. IR (film)  $\nu$  3059, 1933, 1691, 1487, 1419, 1301, 1275, 1176, 1067, 1008, 855, 799  $\text{cm}^{-1}$ ;  $^1\text{H}$  NMR (500 MHz,  $\text{CDCl}_3$ )  $\delta$  7.40 (d,  $J = 8.3$  Hz, 2H), 7.10 (d,  $J = 8.3$  Hz, 2H), 5.19 (t,  $J = 2.4$  Hz, 2H), 3.49 (t,  $J = 2.3$  Hz, 2H);  $^{13}\text{C}$  NMR (125 MHz,  $\text{CDCl}_3$ )  $\delta$  215.2, 171.7, 137.6, 131.4, 131.3, 130.5, 130.0, 120.3, 99.3, 79.7, 33.9; HRMS (EI) calcd. for  $\text{C}_{11}\text{H}_9\text{O}_2\text{Br}$  [ $\text{M}^+$ ] 251.9787, found 251.9786.

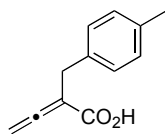

**B11**

**2-(4-Methylbenzyl)-2,3-butadienoic Acid (B11).** Following the general procedure (97.6 mmol scale), ethyl 2-(4-methylbenzyl)-2,3-butadienoate (11.22 g, 52 mmol, 53%) was obtained as a slightly yellow oil. The allenolate (7.3 g, 33.8 mmol) was hydrolyzed at 100  $^\circ\text{C}$  to give 2-(4-methylbenzyl)-2,3-butadienoic acid (3.8 g, 19.7 mmol, 58%) as a solidifying oil after column chromatography. IR (film)  $\nu$  2980, 1962, 1675, 1515, 1420, 1281, 1065, 860  $\text{cm}^{-1}$ ;  $^1\text{H}$  NMR (500 MHz,  $\text{CDCl}_3$ )  $\delta$  7.23–7.11 (m, 4H), 5.19 (s, 2H), 3.54 (s, 2H), 2.35 (s, 3H);  $^{13}\text{C}$  NMR (125 MHz,  $\text{CDCl}_3$ )

$\delta$  215.4, 172.7, 135.9, 135.6, 128.9, 128.6, 100.0, 79.4, 34.0, 21.0; HRMS (EI) calcd. for  $C_{12}H_{12}O_2$  [ $M^+$ ] 188.0837, found 188.0842.

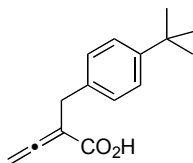

**B12**

**2-(4-*tert*-Butylbenzyl)-2,3-butadienoic acid (B12).** Following the general procedure (86.1 mmol scale), ethyl 2-(4-*tert*-butylbenzyl)-2,3-butadienoate (11.7 g, 45.1 mmol, 52%) was obtained as a slightly yellow oil. The allenolate (10.0 g, 38.7 mmol) was hydrolyzed at 100 °C to give 2-(4-*tert*-butylbenzyl)-2,3-butadienoic acid (6.9 g, 29.9 mmol, 77%) as a solidifying oil after column chromatography. IR (film)  $\nu$  2963, 1963, 1515, 1413, 1364, 1284, 907, 852, 657  $cm^{-1}$ ;  $^1H$  NMR (400 MHz,  $CDCl_3$ )  $\delta$  7.30 (d,  $J = 8.3$  Hz, 2H), 7.17 (d,  $J = 8.2$  Hz, 2H), 5.19 (t,  $J = 2.3$  Hz, 2H), 3.52 (t,  $J = 2.1$  Hz, 2H), 1.31 (s, 9H);  $^{13}C$  NMR (125 MHz,  $CDCl_3$ )  $\delta$  215.5, 172.7, 149.1, 135.6, 128.3, 125.1, 99.8, 79.3, 34.3, 33.9, 31.3; HRMS (EI) calcd. for  $C_{15}H_{18}O_2$  [ $M^+$ ] 230.1307, found 213.1318.

## Synthesis of *N*-Sulfonylimines **C(01–46)**

**Chart 3.** *N*-Sulfonylimine building blocks **C(01–46)**

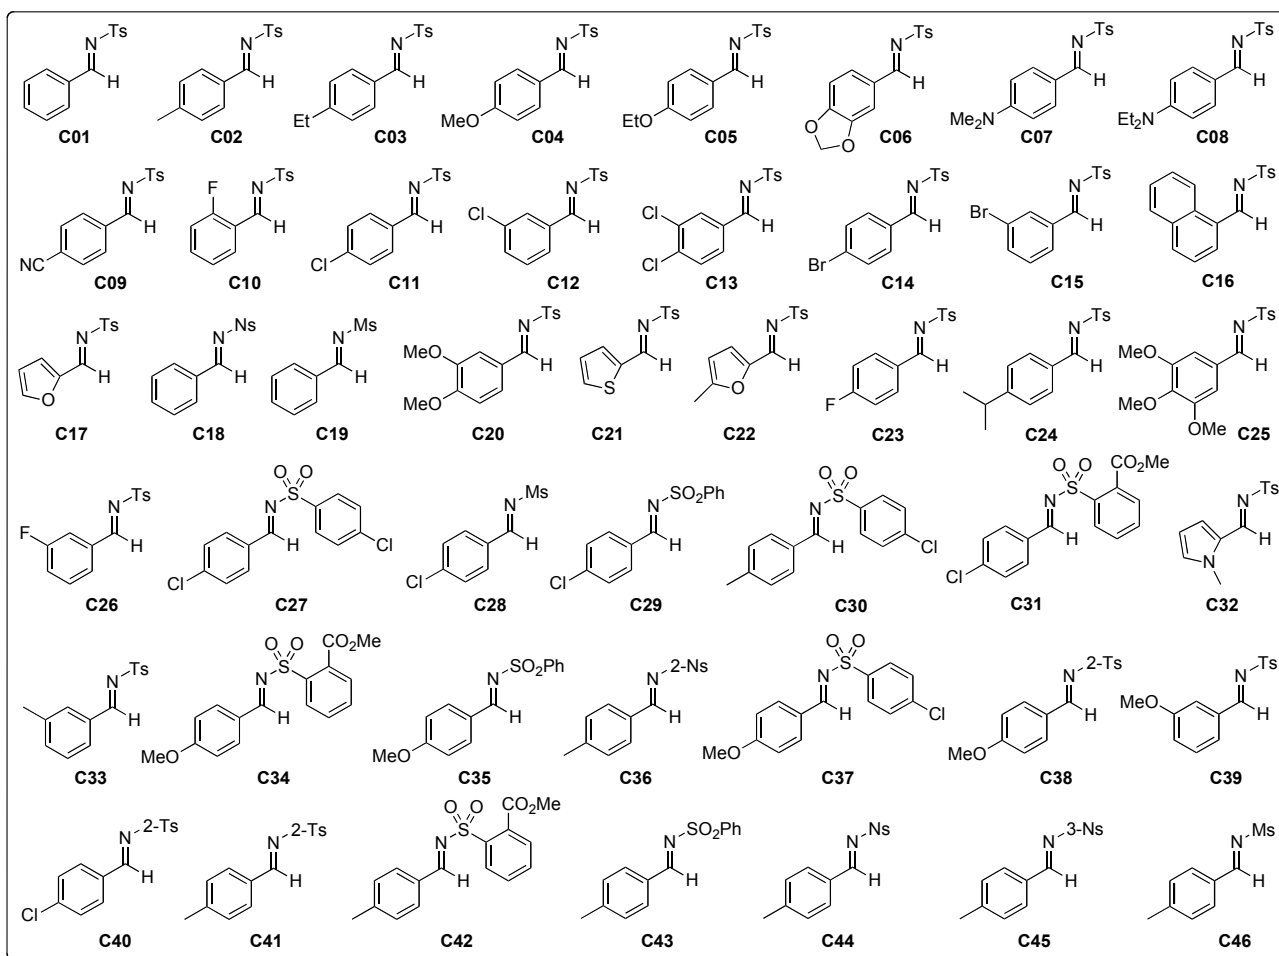

The *N*-sulfonylimines **C01**, **C03**, **C06–C18**, **C20–C24**, **C26–C30**, and **C32–C42** were synthesized through the condensation of the corresponding aldehydes with the sulfonamides catalyzed by  $BF_3 \cdot OEt_2$  with azeotropic water

removal (Dean–Stark), according to the literature procedure.<sup>8</sup> The *N*-sulfonylimines **C02**, **C04**, **C05**, **C19**, **C25**, **C31**, and **C43–C46** were synthesized from the corresponding aldehydes and sulfonamides through the use of TiCl<sub>4</sub>, according to a literature procedure.<sup>9</sup> The spectroscopic data for the following synthesized imines were in agreement with those reported in the literature (or cited therein): **C01**;<sup>10a</sup> **C02**, **C14**, and **C23**;<sup>10b</sup> **C03**;<sup>10c</sup> **C04** and **C16**;<sup>10d</sup> **C05**, **C30**, and **C43**;<sup>10e</sup> **C06**;<sup>10f</sup> **C07** and **C20**;<sup>10g</sup> **C09** and **C39**;<sup>10h</sup> **C11**, **C18**, and **C19**;<sup>10i</sup> **C12**;<sup>10j</sup> **C13**;<sup>10k</sup> **C15**;<sup>10l</sup> **C17**;<sup>10m</sup> **C21**;<sup>10n</sup> **C24**;<sup>10o</sup> **C26** and **C27**;<sup>10p</sup> **C28**;<sup>10q</sup> **C29** and **C35**;<sup>10r</sup> **C33**;<sup>10s</sup> **C46**.<sup>10t</sup>

The spectroscopic data for the previously unreported *N*-sulfonylimines **C10**, **C34**, **C36–C38**, and **C40–C42** that were used in the library synthesis are listed below.

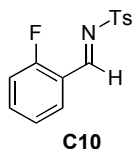

***N*-(2-Fluorobenzylidene)-4-methylbenzenesulfonamide (C10)**. Following the literature procedure,<sup>8</sup> 2-fluorobenzaldehyde (18.6 g, 150 mmol) was reacted with *p*-toluenesulfonamide (24.7 g, 144.0 mmol) in the presence of BF<sub>3</sub>·OEt<sub>2</sub> (10 mol%) to afford **C10** as a white solid after crystallization from hexanes/EtOAc. Yield: 39.6 g (142.8 mmol, 99%). M.p. 136–140 °C; IR (film)  $\nu$  1611, 1572, 1456, 1321, 1157, 1087, 871, 814, 762 cm<sup>-1</sup>; <sup>1</sup>H NMR (400 MHz, C<sub>6</sub>D<sub>6</sub>)  $\delta$  9.53 (s, 1H), 8.00 (d, *J* = 8.2 Hz, 2H), 7.80–7.76 (m, 1H), 6.81–6.77 (m, 3H), 6.54–6.47 (m, 2H), 1.88 (s, 3H); <sup>13</sup>C NMR (75 MHz, C<sub>6</sub>D<sub>6</sub>)  $\delta$  164.3 (d, *J* = 260 Hz), 163.7, 144.9, 137.1 (d, *J* = 9.1 Hz), 134.8, 129.9, 129.4, 128.2, 124.9, 120.5 (d, *J* = 8.4 Hz), 116.4 (d, *J* = 20.6 Hz), 21.8; LRMS (APCI) calcd. for C<sub>14</sub>H<sub>13</sub>FNO<sub>2</sub>S [MH<sup>+</sup>] 278.1, found 278.2.

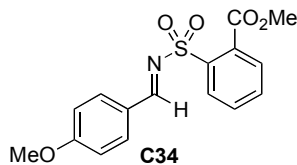

**2-[(4-Methoxybenzylidene)sulfamoyl]benzoic Acid Methyl Ester (C34)**. Following the literature procedure,<sup>8</sup> 4-methoxybenzaldehyde (20.4 g, 150 mmol) was reacted with methyl 2-(aminosulfonyl)benzoate (30.1 g, 140.0 mmol) in the presence of BF<sub>3</sub>·OEt<sub>2</sub> (10 mol%) to afford **C34** as a white solid after crystallization from hexanes/EtOAc. Yield: 16.8 g (50.6 mmol, 36%). M.p. 90–96 °C; IR (film)  $\nu$  2954, 2842, 1736, 1591, 1558, 1513, 1427, 1263, 1158, 1115, 1059, 1023, 954, 810, 772, 610 cm<sup>-1</sup>; <sup>1</sup>H NMR (400 MHz, CDCl<sub>3</sub>)  $\delta$  8.92 (s, 1H), 8.28–8.26 (m, 1H), 7.93 (d, *J* = 8.8 Hz, 2H), 7.68–7.62 (m, 3H), 6.99 (d, *J* = 8.8 Hz, 2H), 3.91 (s, 3H), 3.90 (s, 3H); <sup>13</sup>C NMR (100 MHz, CDCl<sub>3</sub>)  $\delta$  171.1, 167.4, 165.5, 136.8, 134.0, 133.2, 132.8, 131.0, 130.4, 129.4, 125.2, 114.8, 55.7, 53.1; LRMS (APCI) calcd. for C<sub>16</sub>H<sub>16</sub>NO<sub>5</sub>S [MH<sup>+</sup>] 334.1, found 334.3.

8. McKay, W. R.; Proctor, G. R. *J. Chem. Soc., Perkin Trans. 1* **1981**, 2435.

9. Jennings, W. B.; Lovely, C. J. *Tetrahedron* **1991**, *47*, 5561.

10. (a) Chemla, F.; Hebbe, V.; Normant, J. *Synthesis* **2000**, 75. (b) Li, A.; Zhou, Y.; Dai, L.; Hou, X.; Xia, L.; Lin, L. *J. Org. Chem.* **1998**, *63*, 4338. (c) Shi, M.; Li, C. *Tetrahedron: Asymmetry* **2005**, *16*, 1385. (d) Jennings, W. B.; Lovely, C. J. *Tetrahedron* **1991**, *47*, 5561. (e) Gohain, M.; Prajapati, D.; Gogoi, B. J.; Sandhu, J. S. *Synlett* **2004**, 1179. (f) Trost, B. M.; Marrs, C. M. *J. Org. Chem.* **1991**, *56*, 6468. (g) Love, B. E.; Rajee, P. S.; Williams II, T. C. *Synlett* **1994**, 493. (h) Ruano, J. L. G.; Aleman, J.; Cid, M. B.; Parra, A. *Org. Lett.* **2005**, *7*, 179. (i) Davis, F. A.; Lamendola, Jr., J.; Nadir, U.; Kluger, E. W.; Sedergran, T. C.; Panunto, T. W.; Billmers, R.; Jenkins, Jr., R.; Turchi, I. J.; Watson, W. H.; Chen, J. S.; Kimura, M. *J. Am. Chem. Soc.* **1980**, *102*, 2000. (j) Bernardi, L.; Gothelf, A. S.; Hazell, R. G.; Jorgensen, K. A. *J. Org. Chem.* **2003**, *68*, 2583. (k) Nair, V.; Sreekanth, A. R.; Bhadbhade, M. M.; Gonnade, R. C. *Org. Lett.* **2002**, *4*, 3575. (l) Jiang, N.; Qu, Z.; Wang, J. *Org. Lett.* **2001**, *3*, 2989. (m) Ref. 8. (n) Oh, B. H.; Nakamura, I.; Saito, S.; Yamamoto, Y. *Tetrahedron Lett.* **2001**, *42*, 6203. (o) Pandey, M. K.; Bisai, A.; Pandey, A.; Singh, V. K. *Tetrahedron Lett.* **2005**, *46*, 5039. (p) Shi, M.; Chen, L.-H.; Li, C.-Q. *J. Am. Chem. Soc.* **2005**, *127*, 3790. (q) Fujihara, H.; Nagai, K.; Tomioka, K. *J. Am. Chem. Soc.* **2000**, *122*, 12055. (r) Chan, T. H.; Lu, W. *Tetrahedron Lett.* **1998**, *39*, 8605. (s) Shi, M.; Xu, Y. *J. Org. Chem.* **2003**, *68*, 4784. (t) Brown, C.; Hudson, R. F.; Record, K. A. F. *J. Chem. Soc., Chem. Commun.* **1977**, 540.

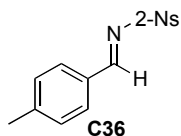

***N*-(4-Methylbenzylidene)-2-nitrobenzenesulfonamide (C36)**. Following the literature procedure,<sup>8</sup> *p*-tolualdehyde (10.4 g, 86.8 mmol) was reacted with 2-nitrobenzenesulfonamide (14.6 g, 72.3 mmol) in the presence of  $\text{BF}_3 \cdot \text{OEt}_2$  (10 mol%) to afford **C36** as a white solid after crystallization from hexanes/EtOAc. Yield: 16.7 g (54.9 mmol, 76%). M.p. 144–148 °C; IR (film)  $\nu$  1639, 1593, 1542, 1366, 1330, 1232, 1161, 1124, 1057, 805  $\text{cm}^{-1}$ ;  $^1\text{H}$  NMR (400 MHz,  $\text{CDCl}_3$ )  $\delta$  9.04 (s, 1H), 8.41–8.39 (m, 1H), 7.89 (d,  $J = 8.2$  Hz, 2H), 7.81–7.77 (m, 3H), 7.33 (d,  $J = 8.1$  Hz, 2H), 2.46 (s, 3H);  $^{13}\text{C}$  NMR (100 MHz,  $\text{CDCl}_3$ )  $\delta$  173.3, 146.3, 133.6, 132.3, 131.7, 131.6, 131.5, 129.9, 129.7, 127.9, 124.1, 21.3; LRMS (APCI) calcd. for  $\text{C}_{14}\text{H}_{13}\text{N}_2\text{O}_4\text{S}$  [ $\text{MH}^+$ ] 305.1, found 305.2.

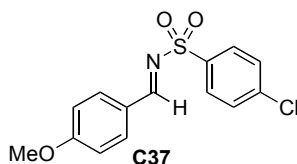

**4-Chloro-*N*-(4-methoxybenzylidene)-benzenesulfonamide (C37)**. Following the literature procedure,<sup>8</sup> 4-methoxybenzaldehyde (21.4 g, 157 mmol) was reacted with 4-chlorobenzenesulfonamide (28.7 g, 150.0 mmol) in the presence of  $\text{BF}_3 \cdot \text{OEt}_2$  (5 mol%) to afford **C37** as a white solid after crystallization from hexanes/EtOAc. Yield: 34.4 g (111.1 mmol, 74%). M.p. 100–102 °C; IR (film)  $\nu$  1644, 1591, 1562, 1513, 1426, 1319, 1264, 1156, 1088, 1014, 806, 772  $\text{cm}^{-1}$ ;  $^1\text{H}$  NMR (400 MHz,  $\text{CDCl}_3$ )  $\delta$  9.05 (s, 1H), 7.84 (d,  $J = 8.6$  Hz, 2H), 7.49 (d,  $J = 8.8$  Hz, 2H), 6.88 (d,  $J = 8.6$  Hz, 2H), 6.49 (d,  $J = 8.9$  Hz, 2H), 3.09 (s, 3H);  $^{13}\text{C}$  NMR (100 MHz,  $\text{CDCl}_3$ )  $\delta$  169.9, 165.6, 139.9, 137.4, 134.0, 129.3, 128.3, 125.0, 114.8, 55.7; LRMS (APCI) calcd. for  $\text{C}_{14}\text{H}_{13}\text{NClO}_3\text{S}$  [ $\text{MH}^+$ ] 310.0, found 310.3.

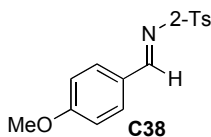

***N*-(4-Methoxybenzylidene)-2-methylbenzenesulfonamide (C38)**. Following the literature procedure,<sup>8</sup> 4-methoxybenzaldehyde (4.3 g, 31.4 mmol) was reacted with *o*-toluenesulfonamide (5.1 g, 30.0 mmol) in the presence of  $\text{BF}_3 \cdot \text{OEt}_2$  (5 mol%) to afford **C38** as a white solid after crystallization from hexanes/EtOAc. Yield: 5.3 g (18.3 mmol, 61%). M.p. 90–93 °C; IR (film)  $\nu$  1591, 1561, 1513, 1425, 1314, 1263, 1157, 1131, 1062, 1024, 811, 760  $\text{cm}^{-1}$ ;  $^1\text{H}$  NMR (400 MHz,  $\text{CDCl}_3$ )  $\delta$  9.12 (s, 1H), 8.42 (d,  $J = 7.8$  Hz, 1H), 7.45 (d,  $J = 8.6$  Hz, 2H), 7.03–6.99 (m, 1H), 6.95–6.89 (m, 2H), 6.49 (d,  $J = 8.8$  Hz, 2H), 3.11 (s, 3H), 2.86 (s, 3H);  $^{13}\text{C}$  NMR (100 MHz)  $\delta$  169.7, 165.4, 138.7, 133.7, 133.4, 132.4, 129.1, 126.3, 125.3, 114.8, 55.7, 20.7; LRMS (APCI) calcd. for  $\text{C}_{15}\text{H}_{16}\text{NO}_3\text{S}$  [ $\text{MH}^+$ ] 290.1, found 290.2.

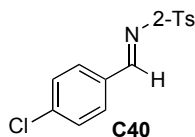

***N*-(4-Chlorobenzylidene)-2-methylbenzenesulfonamide (C40)**. Following the literature procedure,<sup>8</sup> 4-chlorobenzaldehyde (24.3 g, 173 mmol) was reacted with *o*-toluenesulfonamide (25.7 g, 150 mmol) in the presence of  $\text{BF}_3 \cdot \text{OEt}_2$  (10 mol%) to afford **C40** as a white solid after crystallization from hexanes/EtOAc. Yield: 37.4 g (127.3 mmol, 85%). M.p. 118–120 °C; IR (film)  $\nu$  1608, 1562, 1318, 1161, 1062, 791, 714  $\text{cm}^{-1}$ ;  $^1\text{H}$  NMR (400 MHz,  $\text{CDCl}_3$ )  $\delta$  9.06 (s, 1H), 8.09 (d,  $J = 7.9$  Hz, 1H), 7.87 (d,  $J = 8.5$  Hz, 2H), 7.52–7.49 (m, 1H), 7.48 (d,  $J = 8.5$  Hz, 2H), 7.37–7.35 (m, 2H), 2.74 (s, 3H);  $^{13}\text{C}$  NMR (100 MHz,  $\text{CDCl}_3$ )  $\delta$  169.2, 141.6, 138.9, 136.3, 133.8, 132.5, 132.4, 130.9, 129.7, 129.3, 126.4, 20.7; LRMS (APCI) calcd. for  $\text{C}_{14}\text{H}_{13}\text{NO}_2\text{ClS}$  [ $\text{MH}^+$ ] 294.0, found 294.1.

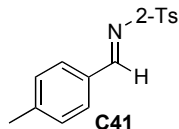

**2-Methyl-N-(4-methylbenzylidene)benzenesulfonamide (C41).** Following the literature procedure,<sup>8</sup> *p*-tolualdehyde (12 mL, 100 mmol) was reacted with *o*-toluenesulfonamide (15.4 g, 90 mmol) in the presence of BF<sub>3</sub>·OEt<sub>2</sub> (9 mol%) to afford **C41** as a white solid after crystallization from hexanes/EtOAc. Yield: 20.4 g (74.6 mmol, 83%). M.p. 103–106 °C; IR (film)  $\nu$  1596, 1562, 1314, 1159, 1131, 1062, 870, 810, 797, 758, 692 cm<sup>-1</sup>; <sup>1</sup>H NMR (400 MHz, CDCl<sub>3</sub>)  $\delta$  9.05 (s, 1H), 8.09 (d, *J* = 7.9 Hz, 1H), 7.83 (d, *J* = 8.2 Hz, 2H), 7.50–7.48 (m, 1H), 7.35–7.32 (m, 2H), 7.30 (d, *J* = 8.0 Hz, 2H), 2.74 (s, 3H), 2.44 (s, 3H); <sup>13</sup>C NMR (100 MHz, CDCl<sub>3</sub>)  $\delta$  170.5, 146.5, 138.8, 136.8, 133.5, 132.4, 131.5, 130.0, 129.9, 129.2, 126.3, 22.0, 20.7; LRMS (APCI) calcd. for C<sub>15</sub>H<sub>16</sub>NO<sub>2</sub>S [MH<sup>+</sup>] 274.1, found 274.3.

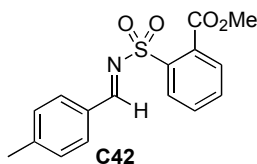

**2-[(4-Methylbenzylidene)sulfamoyl]benzoic Acid Methyl Ester (C42).** Following the literature procedure,<sup>8</sup> *p*-tolualdehyde (15.6 g, 130 mmol) was reacted with methyl 2-(aminosulfonyl)benzoate (25.8 g, 120 mmol) in the presence of BF<sub>3</sub>·OEt<sub>2</sub> (10 mol%) to afford **C42** as a white solid after crystallization from hexanes/EtOAc. Yield: 20.8 g (65.6 mmol, 55%). M.p. 109–112 °C; IR (film)  $\nu$  1736, 1645, 1595, 1562, 1433, 1324, 1294, 1161, 1117, 1059, 803 cm<sup>-1</sup>; <sup>1</sup>H NMR (400 MHz, CDCl<sub>3</sub>)  $\delta$  8.96 (s, 1H), 8.29–8.27 (m, 1H), 7.86 (d, *J* = 8.2 Hz, 2H), 7.69–7.65 (m, 3H), 7.31 (d, *J* = 8.0 Hz, 2H), 3.90 (s, 3H), 2.44 (s, 3H); <sup>13</sup>C NMR (100 MHz, CDCl<sub>3</sub>)  $\delta$  171.9, 167.3, 146.6, 136.5, 133.3, 132.9, 131.6, 131.1, 130.6, 130.0, 129.8, 129.5, 53.1, 22.0; LRMS (APCI) calcd. for C<sub>16</sub>H<sub>16</sub>NO<sub>4</sub>S [MH<sup>+</sup>] 318.1, found 318.1.

## Resin Loading With 4-Substituted 2,3-Butadienoic Acids

### Resin Loading With 2,3-Butadienoic Acid (A01)

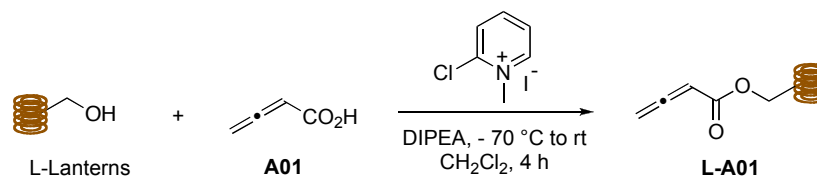

*General Procedure.* An oven-dried vial was charged with lanterns (15  $\mu$ mol/lantern), 2,3-butadienoic acid (10 equiv), and 2-chloro-1-methylpyridinium iodide (10 equiv). After two evacuation/backfill cycles with Ar, the solids were dissolved in dry CH<sub>2</sub>Cl<sub>2</sub> (0.5 mL/lantern). After 30 min, the vial was cooled to -70 °C and diisopropylethylamine (Hünig's base, 20 equiv) was added under an Ar atmosphere. After 1 h, the cooling bath was removed; the vials were then flushed with Ar, capped, and shaken at room temperature for 4 h. The brown solution was removed and the light-yellow lanterns were washed as follows: THF  $\times$  5, DMF  $\times$  5, THF  $\times$  5, DMF  $\times$  5, THF  $\times$  5, DMF  $\times$  5, THF  $\times$  5, DCM  $\times$  5, THF  $\times$  5, DCM  $\times$  5, THF  $\times$  5, DCM  $\times$  5. (Note: Lanterns were soaked for at least 15 min before changing the solvents.)

### Resin Loading With 4-Substituted 2,3-Butadienoic Acids A(02–11)

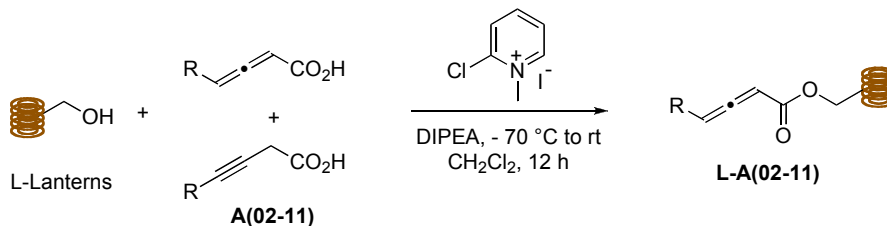

*General Procedure.* An oven-dried vial was charged with a mixture of 4-substituted-2,3-butadienoic acid (**A02–A11**) and tautomeric 3-alkynoic acid (10 equiv), 2-chloro-1-methylpyridinium iodide (10 equiv), and lanterns (15  $\mu$ mol/lantern). After two evacuation/backfill cycles with Ar, the solids were dissolved in dry CH<sub>2</sub>Cl<sub>2</sub> (0.5

mL/lantern). After 30 min, the vial was cooled to  $-78\text{ }^{\circ}\text{C}$  and DIPEA (20 equiv) was added under an Ar atmosphere. After 1 h, the cooling bath was removed; the vials were then flushed with Ar, capped, and shaken at room temperature for 12 h. The brown solution was removed and the light-yellow lanterns were washed as follows: THF  $\times$  5, DMF  $\times$  5, THF  $\times$  5, DMF  $\times$  5, THF  $\times$  5, DMF  $\times$  5, THF  $\times$  5, DCM  $\times$  5, THF  $\times$  5, DCM  $\times$  5, THF  $\times$  5, DCM  $\times$  5. (Note: Lanterns were soaked for at least 15 min before changing solvents.)

### Resin Loading With 2-Substituted 2,3-Butadienoic Acids **B(01–12)**

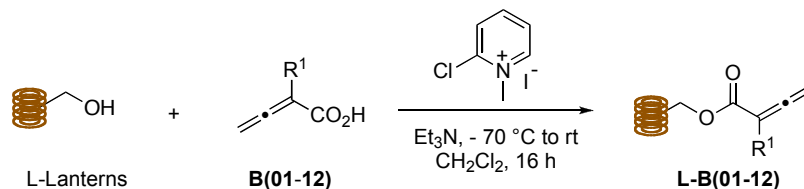

*General Procedure.* An oven-dried flask or vial was loaded with the desired number of lanterns (L-series; 15  $\mu\text{mol}$  loading capacity per lantern), 2-chloro-1-methylpyridinium iodide (10 equiv, 0.15 mmol/lantern), and the butadienoic acid (10 equiv, 0.15 mmol/lantern). The flask was charged with Ar and  $\text{CH}_2\text{Cl}_2$  (0.5 mL/Lantern) was added. After soaking for 30 min, the suspension was cooled to  $-70\text{ }^{\circ}\text{C}$  and triethylamine (20 equiv, 0.3 mmol/lantern) was added. The flask was swirled manually to ensure mixing and then the cooling bath was removed. While being warmed to room temperature, the flask was swirled manually from time to time; at ca.  $-5\text{ }^{\circ}\text{C}$  the solution began to turn red/brown. At room temperature, the flask was capped and swirled or shaken gently for 16 h. The colored lanterns were then washed as follows (ca. 1 mL solvent/lantern; at room temperature, the lanterns were at least soaked for a couple of minutes unless otherwise stated):  $\text{CH}_2\text{Cl}_2$  (7 $\times$ ), toluene (2 $\times$ ), THF (3 $\times$ ), DMF (3 $\times$ ), THF (3 $\times$ ), DMF for 16 h (1 $\times$ ), DMF (2 $\times$ ), THF (3 $\times$ ), toluene (3 $\times$ ),  $\text{CH}_2\text{Cl}_2$  (3 $\times$ ). The loaded lanterns were dried in the air or used directly in the next step. The lantern-bound allenoate **L-B01** was stable for several months at  $-18\text{ }^{\circ}\text{C}$  and **L-B05** for several weeks at  $-18\text{ }^{\circ}\text{C}$ .

### Solid Phase [3 + 2] Annulations with *N*-Sulfonylimines

#### [3 + 2] Cycloaddition of Lantern-Bound 2,3-Butadienoate **L-A01**

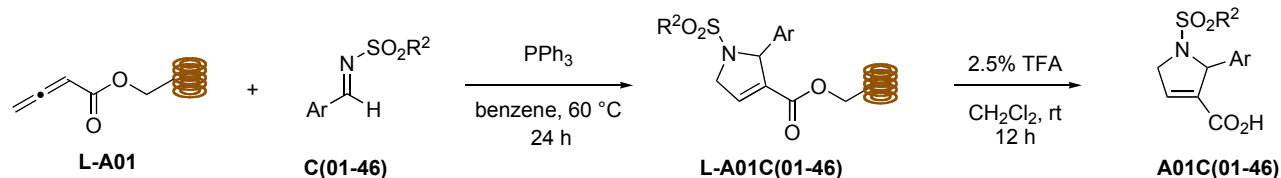

*General Procedure.* Lantern-bound 2,3-butadienoate **L-A01** was washed under an Ar flow with dry THF (1 mL/lantern, 5 times) and dry benzene (1 mL/lantern, 5 times). A solution of *N*-sulfonylimine (5 equiv) in benzene (0.5 mL/lantern) was then added followed by triphenylphosphine (0.5 equiv) in benzene (0.5 mL/lantern). The mixture was agitated manually and heated at  $60\text{ }^{\circ}\text{C}$  for 24 h. The reaction solution was then removed and the brown lanterns washed as follows: toluene, DCM  $\times$  5, DMF  $\times$  5, THF  $\times$  5, DMF  $\times$  5, THF  $\times$  5, toluene, THF  $\times$  5, and then left in toluene overnight at  $60\text{ }^{\circ}\text{C}$ . Further washing with toluene  $\times$  5, THF  $\times$  5, DMF  $\times$  5, THF  $\times$  5, DMF  $\times$  5, THF  $\times$  5, toluene, THF  $\times$  5, DCM  $\times$  5, THF  $\times$  5, DCM  $\times$  5, THF  $\times$  5, DCM  $\times$  5, and then left in DCM for 1 h. The annulation products were cleaved through treatment with TFA/DCM (2.5%, 1 mL/lantern) to yield the crude carboxylic acid product **A01C(01–46)**.

The spectroscopic data of a representative product **A01C02** are listed below.



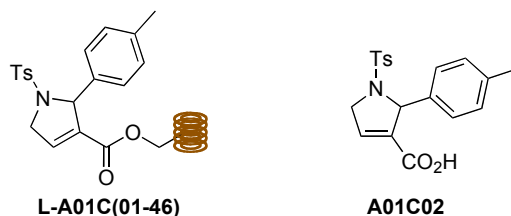

**1-(4-Toluenesulfonyl)-2-(p-tolyl)-2,5-dihydro-1H-pyrrole-3-carboxylic Acid (A01C02).** According to the general procedure, **L-A01C02** was formed. Three lanterns were then treated with 2.5% TFA/DCM (3 mL) to yield a crude product (15.6 mg, 97% yield), which was purified by flash column chromatography (SiO<sub>2</sub>; hexane/EtOAc, 4/1 with 2% AcOH) to afford **A01C02** as an off-white solid (14.7 mg, 91%). IR (neat)  $\nu$  3408, 2964, 2926, 2875, 1697, 1645, 1455, 1343, 1162, 814 cm<sup>-1</sup>; <sup>1</sup>H NMR (500 MHz, CDCl<sub>3</sub>)  $\delta$  7.42 (d, *J* = 8.0 Hz, 2H), 7.15 (d, *J* = 8.0 Hz, 2H), 7.09 (d, *J* = 9.5 Hz, 2H), 7.04 (d, *J* = 8.0 Hz, 2H), 6.88 (d, *J* = 1.5 Hz, 1H), 5.67 (d, *J* = 6.0 Hz, 1H), 4.52–4.48 (dd, *J* = 2.0, 18.0 Hz, 1H), 4.41–4.36 (dd, *J* = 1.5, 6.0 Hz, 1H), 2.38 (s, 3H), 2.31 (s, 3H), 2.06–1.99 (m, 2H), 1.00 (t, *J* = 7.5 Hz, 3H); 2.37 (s, 3H), 2.31 (s, 3H); <sup>13</sup>C NMR (125 MHz, CDCl<sub>3</sub>)  $\delta$  166.5, 143.3, 138.0, 137.9, 136.2, 135.6, 135.3, 129.5, 129.1, 127.7, 127.1, 68.5, 54.9, 21.5, 21.2; HRMS (EI) calcd. for C<sub>19</sub>H<sub>19</sub>NO<sub>4</sub>S [M<sup>+</sup>] 357.1031, found 357.1035.

### [3 + 2] Cycloaddition of Lantern-Bound 4-Substituted 2,3-Butadienoates

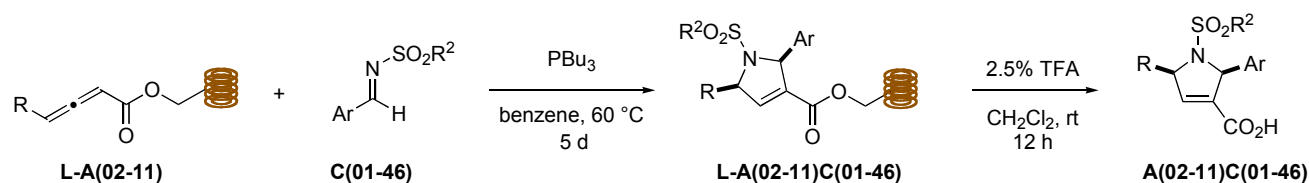

**General Procedure.** Lantern-bound 4-substituted-2,3-butadienoate **L-A(02-11)** was washed under Ar flow with dry THF (1 mL/lantern, 5 times) and dry benzene (1 mL/lantern, 5 times). A solution of 5 equiv of *N*-tosylimine in benzene (0.5 mL for each lantern) was then added followed by 0.5 equiv of tributylphosphine. The mixture was agitated manually and heated at 60 °C for 5 days. The reaction solution was then removed and the light-yellow lanterns were washed as follows: toluene, DCM  $\times$  5, DMF  $\times$  5, THF  $\times$  5, DMF  $\times$  5, THF  $\times$  5, toluene, THF  $\times$  5, and then left in toluene overnight at 60 °C. Further washing with toluene  $\times$  5, THF  $\times$  5, DMF  $\times$  5, THF  $\times$  5, DMF  $\times$  5, THF  $\times$  5, and then left in DMF at 60 °C for 4 h; THF  $\times$  5, DMF  $\times$  5, THF  $\times$  5, DMF, NH<sub>4</sub>Cl/H<sub>2</sub>O, THF/H<sub>2</sub>O, DCM  $\times$  5, toluene, THF  $\times$  5, DCM  $\times$  5, THF  $\times$  5, DCM  $\times$  5, THF  $\times$  5, DCM  $\times$  5, and then left in DCM for 1 h. (Note: Lanterns were soaked for at least 15 min before changing solvents.) The annulation products were cleaved by treatment with TFA/DCM 2.5% (1 mL/lantern) to yield the crude carboxylic acid products **A(02-11)C(01-46)**.

The spectroscopic data of the representative product **A05C02** are listed below.

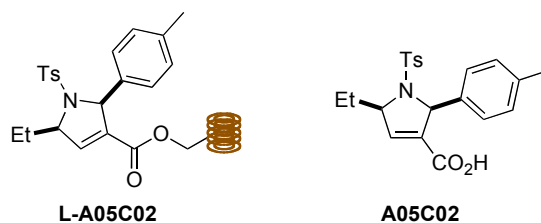

**5-Ethyl-1-(4-toluenesulfonyl)-2-(p-tolyl)-2,5-dihydro-1H-pyrrole-3-carboxylic Acid (A05C02).** According to the general procedure, performed on a 0.045-mmol scale, **L-A05C02** was formed. Three lanterns were then treated with 2.5% TFA/DCM (3 mL) to yield a crude product (16.8 mg, 97% yield), which was purified by flash chromatography (SiO<sub>2</sub>; hexane/EtOAc, 4:1 with 2% AcOH) to afford **A05C02** as an off-white solid (15.9 mg, 92% yield over three steps). IR (neat)  $\nu$  3408, 2964, 2926, 2875, 1697, 1645, 1455, 1343, 1162, 814 cm<sup>-1</sup>; <sup>1</sup>H NMR (500 MHz, CDCl<sub>3</sub>)  $\delta$  7.64 (d, *J* = 8.1 Hz, 2H), 7.25 (d, *J* = 8.1 Hz, 4H), 7.15 (d, *J* = 8.1 Hz, 2H), 6.87 (s, 1H), 5.65 (s, 1H), 4.60–4.56 (m, 1H), 2.43 (s, 3H), 2.36 (s, 3H), 2.16–2.02 (m, 1H), 1.85–1.65 (m, 1H), 1.05 (t, *J* = 7.9 Hz, 3H); <sup>13</sup>C NMR (125 MHz, CDCl<sub>3</sub>)  $\delta$  166.1, 143.7, 142.5, 137.9, 136.7, 135.2, 133.2, 129.6, 129.1, 127.9, 127.5, 120.0, 68.9, 29.9, 21.5, 21.2, 10.4; HRMS (EI) calcd. for C<sub>21</sub>H<sub>23</sub>NO<sub>4</sub>S [M<sup>+</sup>] 385.1348, found 385.1354.

## Solid Phase [4 + 2] Annulations with *N*-Sulfonylimines

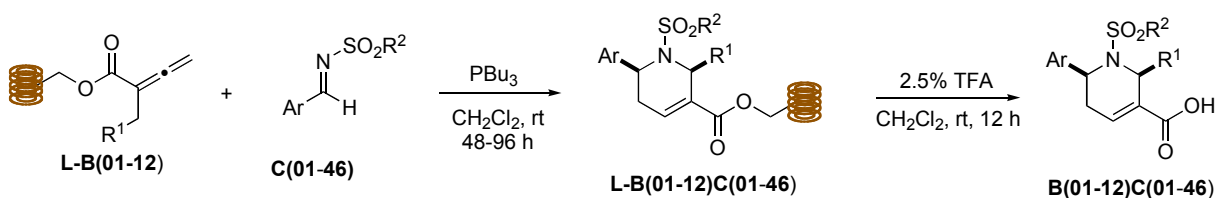

**General Procedure.** The lantern-bound allenoates **L-B(01–12)** were placed in an oven-dried vial or flask, charged with  $Ar$ , and washed with distilled, dry  $CH_2Cl_2$  (3 $\times$ ). The solvent was evaporated and the *N*-sulfonylimine (5 equiv) was added as a solid.  $CH_2Cl_2$  (0.5 mL/lantern) was added. After the imine had dissolved,  $PBu_3$  (0.5 equiv) was added. The vial or flask was removed from the  $Ar$  line, capped, and then gently shaken or swirled at room temperature for 48 h ( $R^1 = H$ ) or 96 h ( $R^1 = aryl$ ). The lanterns were washed as follows (ca. 1 mL solvent/lantern; the lanterns were soaked at least for a couple of minutes at room temperature unless otherwise stated):  $CH_2Cl_2$  (5 $\times$ ), toluene (2 $\times$ ), THF (3 $\times$ ), DMF (3 $\times$ ), THF (3 $\times$ ), 20%  $Bu_3N$  in THF at 60 °C for 16 h (1 $\times$ ), THF (3 $\times$ ), 50%  $H_2O$  in THF (3 $\times$ ), THF (3 $\times$ ), 20% HOAc in THF for 1h (1 $\times$ ), THF (3 $\times$ ), 50%  $H_2O$  in THF (3 $\times$ ), THF (3 $\times$ ), DMF (3 $\times$ ), THF (3 $\times$ ), 20%  $Bu_3N$  in THF at 60 °C for 16 h (1 $\times$ ), THF (3 $\times$ ), 50%  $H_2O$  in THF (3 $\times$ ), THF (3 $\times$ ), 20% HOAc in THF for 1h (1 $\times$ ), THF (3 $\times$ ), 50%  $H_2O$  in THF (2 $\times$ ), 2.5 M aqueous  $NH_4Cl$ :THF (1:1) for 1 h (1 $\times$ ), 50%  $H_2O$  in THF (3 $\times$ ), THF (3 $\times$ ), DMF (3 $\times$ ), THF (3 $\times$ ), toluene (2 $\times$ ),  $CH_2Cl_2$  (3 $\times$ ), toluene for 16 h (1 $\times$ ),  $CH_2Cl_2$  (3 $\times$ ). The loaded lanterns were dried in the air or used directly in the next step. After washing, the products **L-B(01–12)C(01–46)** were cleaved from the lantern by adding a solution of 2.5% TFA in  $CH_2Cl_2$  (1 mL) and leaving the mixture to stand for 12 h in a small vial. Removal of the lantern, rinsing it with  $CH_2Cl_2$ , and concentration afforded the product as a crude oil. Small amounts of remaining TFA were removed by co-evaporation with  $CHCl_3$  and blow-drying using a gentle flow of air.

The spectroscopic data of the representative products **B01C02**, **B01C12**, and **B02C02** are listed below.

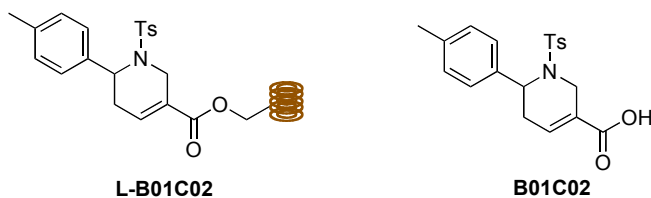

**1-(4-Toluenesulfonyl)-6-(*p*-tolyl)-1,2,5,6-tetrahydropyridine-3-carboxylic Acid (**B01C02**).** According to the general procedure, lantern-bound 2-methylbuta-2,3-dienoate **L-B01** (80 L-lanterns, 1.20 mmol) was reacted with 4-methyl-*N*-(4-methylbenzylidene)-benzenesulfonamide **C02** (1.64 g, 6 mmol) in the presence of *n*- $Bu_3P$  (150  $\mu$ L, 0.6 mmol). After washing, the product was cleaved from one lantern by adding a solution of 2.5% TFA in  $CH_2Cl_2$  (1 mL) and letting it stand for 12 h. Cleavage afforded **B01C02** as a yellowish oil; crude yield: 6.2 mg (0.0167 mmol, 111%); yield after flash column chromatography: 5.25 mg (0.0142 mmol, 94%). IR (film)  $\nu$  3032, 2930, 1694, 1340, 1160, 1100  $cm^{-1}$ ;  $^1H$  NMR (400 MHz,  $CDCl_3$ )  $\delta$  7.69 (d,  $J = 8.3$  Hz, 2H), 7.26 (d,  $J = 8.0$  Hz, 2H), 7.16–7.07 (m, 5H), 5.33 (d,  $J = 6.6$  Hz, 1H), 4.43 (d,  $J = 18.6$  Hz, 1H), 3.45–3.38 (m, 1H), 2.67–2.55 (m, 2H), 2.41 (s, 3H), 2.32 (s, 3H);  $^{13}C$  NMR (100 MHz,  $CDCl_3$ )  $\delta$  169.5, 143.6, 139.7, 137.7, 137.2, 134.8, 129.8, 129.3, 127.1, 127.0, 126.7, 51.8, 39.1, 27.2, 21.5, 21.0; HRMS (EI) calcd. for  $C_{20}H_{21}NO_4S$  [ $M^+$ ] 371.1191, found 371.1184.

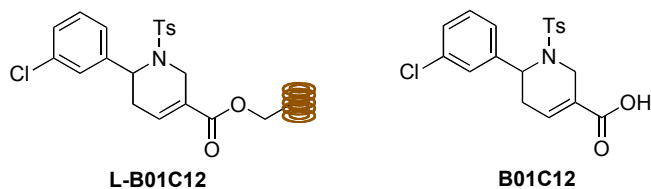

**6-(3-Chlorophenyl)-1-(4-toluenesulfonyl)-1,2,5,6-tetrahydropyridine-3-carboxylic Acid (**B01C12**).** According to the general procedure, lantern-bound 2-methylbuta-2,3-dienoate **L-B01** (6 L-lanterns, 0.09 mmol) was reacted with *N*-(3-chlorobenzylidene)-4-methylbenzenesulfonamide **C12** (0.132 g, 0.45 mmol) in the presence of *n*- $Bu_3P$  (12  $\mu$ L, 0.045 mmol). After washing, the product was cleaved from one lantern by adding a solution of 2.5% TFA in  $CH_2Cl_2$  (1 mL) and letting the mixture stand for 12 h. Cleavage afforded **B01C12** as a yellowish oil; crude yield: 5.9 mg

(0.015 mmol, 100%); yield after flash column chromatography: 5.8 mg (99%).  $R_f$  0.22 (hexanes/EtOAc, 2:1 + 2% HOAc); IR (film)  $\nu$  2925, 1692, 1596, 1433, 1338, 1289, 1160, 1101, 960, 661  $\text{cm}^{-1}$ ;  $^1\text{H}$  NMR (400 MHz,  $\text{CDCl}_3$ )  $\delta$  7.68 (d,  $J$  = 8.3 Hz, 2H), 7.39–7.32 (m, 1H), 7.27 (d,  $J$  = 8.7 Hz, 2H), 7.23–7.12 (m, 2H), 5.33 (d,  $J$  = 6.4 Hz, 1H), 4.49 (d,  $J$  = 18.8 Hz, 1H), 3.44 (d,  $J$  = 18.7 Hz, 1H), 2.70–2.53 (m, 2H), 2.42 (s, 3H);  $^{13}\text{C}$  NMR (100 MHz  $\text{CDCl}_3$ )  $\delta$  169.2, 143.9, 140.0, 138.8, 137.0, 134.6, 130.0, 129.9, 128.2, 127.4, 127.0, 126.9, 125.3, 51.7, 39.3, 27.2, 21.6; HRMS (EI) calcd. for  $\text{C}_{19}\text{H}_{18}\text{ClNO}_4\text{S}$  [ $\text{M}^+$ ] 391.0645, found 391.0646.

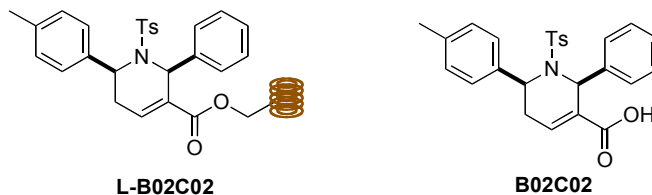

**2-Phenyl-1-(4-toluenesulfonyl)-6-(*p*-tolyl)-1,2,5,6-tetrahydropyridine-3-carboxylic Acid (B02C02).** Following the general procedure, lantern-bound 2-benzylbuta-2,3-dienoate **L-B02** (31 L-Lanterns, 0.465 mmol) was reacted with *N*-(4-methylbenzylidene)-4-methylbenzenesulfonamide **C02** (0.64 g, 2.33 mmol) in the presence of *n*- $\text{Bu}_3\text{P}$  (58  $\mu\text{L}$ , 0.235 mmol). Cleavage afforded **B02C02** as a yellowish oil; crude yield: 7.0 mg (0.0156 mmol, 104%); yield after flash column chromatography: 6.1 mg (91%). IR (film)  $\nu$  2923, 1690, 1341, 1284, 1161, 1090, 730, 659  $\text{cm}^{-1}$ ;  $^1\text{H}$  NMR (400 MHz,  $\text{CDCl}_3$ )  $\delta$  7.77 (d,  $J$  = 8.4 Hz, 2H), 7.29 (d,  $J$  = 8.1 Hz, 2H), 6.99–6.91 (m, 6H), 6.83 (d,  $J$  = 8.1 Hz, 2H), 6.71 (d,  $J$  = 8.0 Hz, 2H), 6.11 (s, 1H), 5.11 (m, 1H), 2.70–2.63 (m, 1H), 2.42 (s, 3H), 2.25–2.17 (m, 1H), 2.14 (s, 3H);  $^{13}\text{C}$  NMR (100 MHz,  $\text{CDCl}_3$ )  $\delta$  169.4, 143.7, 140.8, 138.1, 137.2, 136.8, 135.2, 130.1, 129.9, 128.4, 127.7, 127.6 (2x), 127.2, 126.5, 54.1, 52.5, 26.4, 21.6, 20.8; HRMS (EI) calcd. for  $\text{C}_{26}\text{H}_{25}\text{NO}_4\text{S}$  [ $\text{M}^+$ ] 447.1504, found 447.1506.

## Solid Phase Thiol Addition to the Dihydropyrrrole Scaffold

**Chart 4.** Thiol building blocks **E(01–32)**

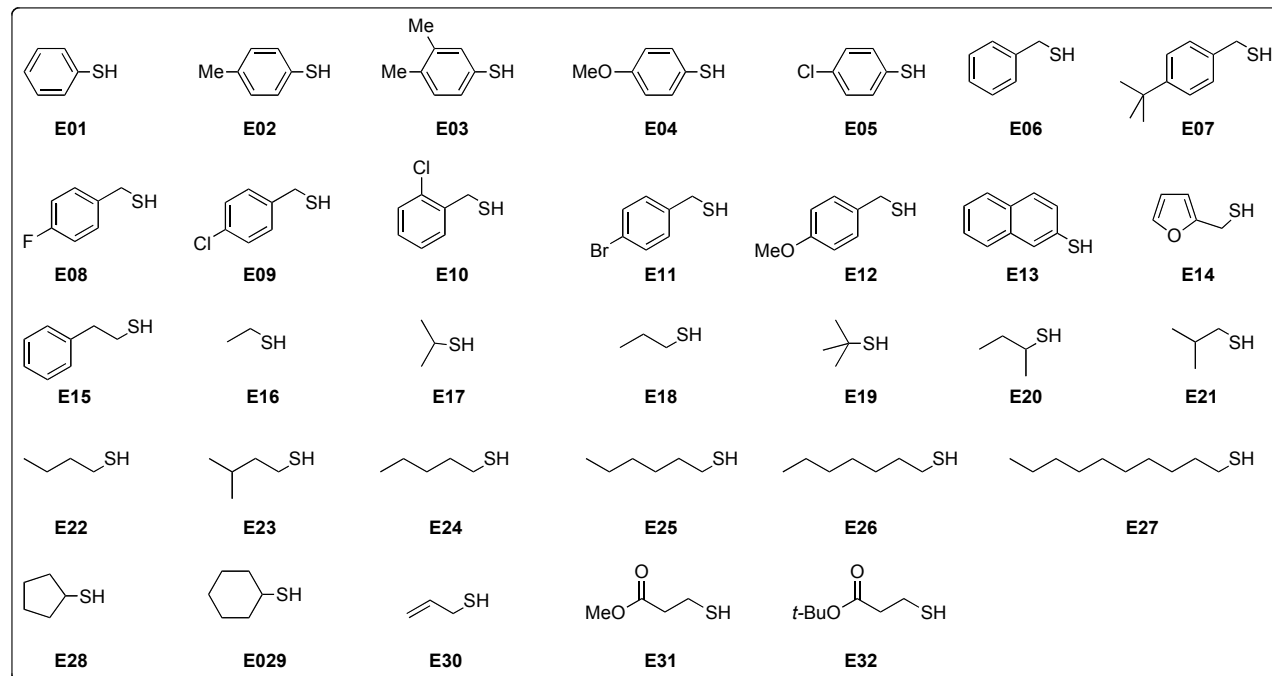

For each of the selected thiols, the reaction conditions were optimized. The conditions used for the library synthesis are listed below.

**Conditions A:** For thiols **E01**, **E06**, **E07**, **E16**, **E25**, **E30**, **E32**, **E02**, **E04**, **E17**, **E18**, **E19**, **E20**, **E21**, **E22**, **E23**, **E24**, **E28**, and **E29** with the imine building blocks **C01**, **C03**, **C09**, **C10**, **C24**, and **C27**; 100 equiv thiol, 10 equiv *n*-BuLi, THF,  $-25\text{ }^{\circ}\text{C}$ , 10 d.

**Conditions B:** For thiols **E02**, **E04**, **E17**, **E18**, **E19**, **E20**, **E21**, **E22**, **E23**, **E24**, **E28**, and **E29** with the rest of the imines: 100 equiv thiol, 6 equiv *n*-BuLi, THF,  $-25\text{ }^{\circ}\text{C}$ , 10 d.

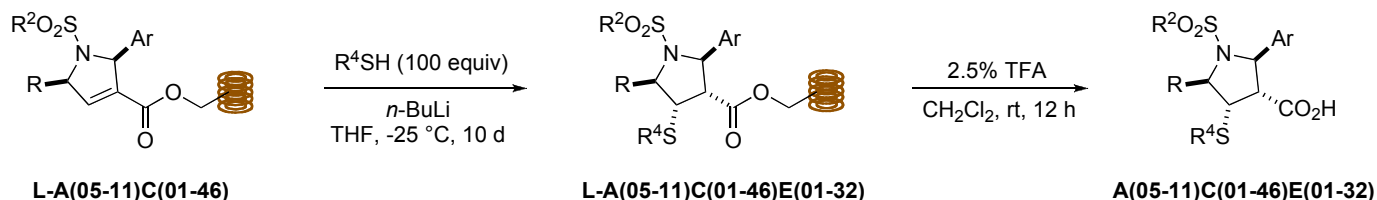

**General Procedure.** The lantern-bound dihydropyrrole **L-A(05-11)C(01-46)** was placed in an oven-dried vial or flask and charged with Ar. The lantern(s) were washed five times with freshly distilled THF and then soaked in THF (0.5 mL/lantern) for 30 min. The thiol (100 equiv, in solid or liquid form) was then added. The vial or flask was placed in a cooling bath at  $-70\text{ }^{\circ}\text{C}$  and *n*-BuLi (6 or 10 equiv) was added via syringe. The mixture was left to warm to room temperature over 30 min, the Ar line was removed, and the vial was capped and placed in a freezer at  $-25\text{ }^{\circ}\text{C}$  for 10 days. The lanterns were then washed as follows: THF (5 $\times$ ), DMF (5 $\times$ ), THF (5 $\times$ ), DMF (5 $\times$ ), THF (5 $\times$ ), DMF (5 $\times$ ),  $\text{CH}_2\text{Cl}_2$  (3 $\times$ ), toluene (1 $\times$  and overnight), THF (5 $\times$ ), 50%  $\text{H}_2\text{O}$  in THF (1 $\times$ ), 2.5 M aqueous  $\text{NH}_4\text{Cl}:\text{THF}$  (1:1) for 1 h (1 $\times$ ), 50%  $\text{H}_2\text{O}$  in THF (3 $\times$ ), THF (5 $\times$ ), DMF (3 $\times$ ), DMF (1 $\times$  and overnight), THF (3 $\times$ ),  $\text{CH}_2\text{Cl}_2$  (3 $\times$ ), toluene (3 $\times$ ), THF (3 $\times$ ),  $\text{CH}_2\text{Cl}_2$  (3 $\times$ ), toluene (3 $\times$ ),  $\text{CH}_2\text{Cl}_2$  (3 $\times$ ). The lanterns were soaked in  $\text{CH}_2\text{Cl}_2$  for 30 min and then a solution of 2.5% TFA in  $\text{CH}_2\text{Cl}_2$  (ca. 1 mL per lantern) was added to cleave the compound. After 12 h, the lantern was removed, rinsed with  $\text{CH}_2\text{Cl}_2$ , and concentrated to afford the crude product **A(05-11)C(01-46)E(01-32)**.

The spectroscopic data of the representative product **A05C02E01** are listed below. Crystallographic data for **A05C02E01** and **B01C02E01** have been deposited with the Cambridge Crystallographic Data Centre as supplementary numbers CCDC 631680 and 631681. These data can be obtained online free of charge (or from the Cambridge Crystallographic Data Center, 12, Union Road, Cambridge CB2 1EZ, UK; fax: (+44) 1223-336-033; or [deposit@ccdc.cam.ac.uk](mailto:deposit@ccdc.cam.ac.uk)).

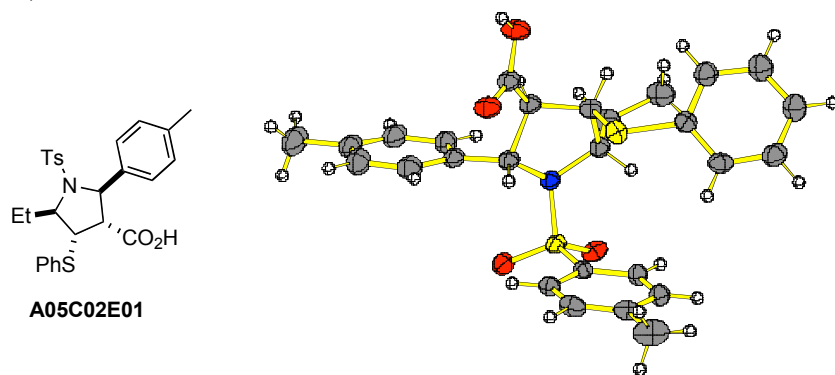

**5-Ethyl-4-phenylsulfanyl-1-(4-toluenesulfonyl)-2-(*p*-tolyl)-pyrrolidine-3-carboxylic Acid (A05C02E01).**

Following the procedure described above, **L-A05C02** was reacted with benzenethiol (0.045 mmol scale, conditions A). Upon TFA-mediated cleavage, the product **A05C02E01** was obtained as an off-white solid (13.2 mg, 89% yield over four steps). IR (neat)  $\nu$  3544, 3165, 3002, 2944, 1726, 1634, 1444, 1375, 1164, 819, 750, 665  $\text{cm}^{-1}$ ;  $^1\text{H}$  NMR (500 MHz,  $\text{CDCl}_3$ )  $\delta$  7.67 (d,  $J = 8.0$  Hz, 2H), 7.41 (d,  $J = 5.0$  Hz, 2H), 7.33–7.30 (m, 5H), 7.15 (d,  $J = 8.0$  Hz, 2H), 5.00 (d,  $J = 10.0$  Hz, 1H), 3.95 (dd,  $J = 9.5, 4.5$  Hz, 1H), 3.69 (d,  $J = 6.0$  Hz, 1H), 3.47 (dd,  $J = 9.5, 6.0$  Hz, 1H), 2.46 (s, 3H), 2.36 (s, 3H), 2.14–2.09 (m, 1H), 1.80–1.74 (m, 1H), 0.92 (t,  $J = 7.3$  Hz, 3H);  $^{13}\text{C}$  NMR (125 MHz,  $\text{CDCl}_3$ )  $\delta$  172.7, 143.4, 137.4, 137.2, 134.6, 133.1, 132.3, 129.3, 129.1, 128.9, 128.2, 128.0, 127.8, 127.0, 69.7, 64.0, 56.0, 51.9, 29.7, 21.5, 21.0, 10.6; HRMS (EI) calcd. for  $\text{C}_{27}\text{H}_{29}\text{NO}_4\text{S}_2$  [ $\text{M}^+$ ] 495.1523, found 495.1538.

## Solid Phase Thiol Addition to the Tetrahydropyridine Scaffold

For each of the selected thiols, the reaction conditions were optimized. The conditions used for the library synthesis are listed below.

**Conditions A:** For **E01**, **E02**, **E04**, and **E05**; 100 equiv thiol, 1 equiv *n*-BuLi, 1 equiv [12]crown-4, THF, 60 °C, 4 d.

**Conditions B:** For **E06** and **E09**; 100 equiv thiol, 1 equiv *n*-BuLi, THF, rt, 4 d.

**Conditions C:** For **E15**, **E16**, **E18**, and **E30**; 100 equiv thiol, 1 equiv *n*-BuLi, THF, 40 °C, 2 d.

**Conditions D:** For **E22**; 100 equiv thiol, 1 equiv *n*-BuLi, THF, 40 °C, 4 d.

**Conditions E:** For **E07**, **E21**, and **E24**; 100 equiv thiol, 1 equiv *n*-BuLi, THF, 40 °C, 8 d.

**Conditions F:** For **E23**, **E25**, and **E28**; 100 equiv thiol, 1 equiv *n*-BuLi, THF, 60 °C, 2 d.

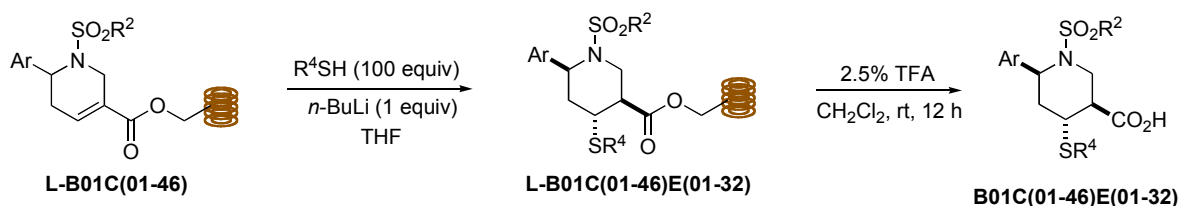

**General Procedure.** The lantern-bound 6-aryl-*N*-sulfonyl-1,2,5,6-tetrahydropyridine-3-carboxylate **L-B01C(01-46)** was placed in an oven-dried vial or flask and charged with Ar. The lantern(s) were washed three times with freshly distilled THF and then soaked in THF (0.5 mL/lantern). The thiol (100 equiv) was added to the soaked lanterns as a liquid or as a solid. In the case of aromatic thiols, [12]crown-4 (1 equiv) was added. The vial or flask was placed in a cooling bath at  $-70$  °C and *n*-BuLi (1 equiv) was added via syringe. The mixture was left to warm to room temperature over 30 min, the Ar line was removed, and then the vial was capped and placed aside for the indicated time and at the indicated temperature. It was not necessary to shake or swirl this mixture during the reaction. After the reaction was complete, the lanterns were washed as follows: THF (5 $\times$ ), DMF (3 $\times$ ), THF (3 $\times$ ),  $CH_2Cl_2$  (3 $\times$ ), toluene (1 $\times$  and overnight), THF (3 $\times$ ), 50%  $H_2O$  in THF (1 $\times$ ), 2.5 M aqueous  $NH_4Cl$ :THF (1:1) for 1 h (1 $\times$ ), 50%  $H_2O$  in THF (3 $\times$ ), THF (3 $\times$ ), DMF (2 $\times$ ), DMF (1 $\times$  and overnight), THF (3 $\times$ ),  $CH_2Cl_2$  (3 $\times$ ), toluene (3 $\times$ ), THF (3 $\times$ ),  $CH_2Cl_2$  (3 $\times$ ), toluene (3 $\times$ ),  $CH_2Cl_2$  (3 $\times$ ). After washing, the product was cleaved from a lantern by adding a solution of 2.5% TFA in  $CH_2Cl_2$  (1 mL) and then letting the mixture stand for 12 h in a 4-mL vial. Removal of the lantern, rinsing it with  $CH_2Cl_2$ , and concentration afforded the product as a crude oil. Small amounts of remaining TFA were removed by co-evaporation with  $CHCl_3$  and blow-drying using a gentle flow of air.

Note: Because the thioethers are sensitive, extensive contact with basic media should be avoided to prevent  $\beta$ -elimination.

The spectroscopic data of the representative products **B01C01E01** and **B01C01E07** are listed below. The ORTEP drawing below is that of the piperidine derivative **B01C02E01** presenting a 6-tolyl substituent.

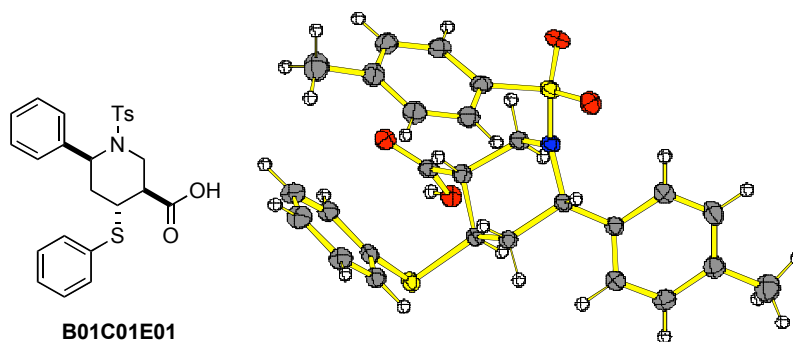

**6-Phenyl-4-phenylsulfanyl-1-(4-toluenesulfonyl)-piperidine-3-carboxylic Acid (B01C01E01).** According to the general procedure, lantern-bound 6-phenyl-1-(4-toluenesulfonyl)-1,2,5,6-tetrahydropyridine-3-carboxylate **L-B01C01** (1 lantern, 0.015 mmol) was reacted with benzenethiol **E01** (154  $\mu$ L, 1.5 mmol) and *n*-BuLi (10  $\mu$ L, 0.015 mmol) in the presence of [12]crown-4 (2.4  $\mu$ L, 0.015 mmol). The reaction mixture was heated at 60 °C for 4 days (conditions A). Cleavage afforded **B01C01E01** as a slightly yellow-colored oil. Crude yield: 5.4 mg (0.0115 mmol, 77%). IR (film)  $\nu$  3429, 2925, 1708, 1448, 1339, 1157, 1091, 968  $\text{cm}^{-1}$ ;  $^1\text{H}$  NMR (400 MHz,  $\text{CDCl}_3$ )  $\delta$  7.66 (d,  $J$  = 8.3 Hz, 2H), 7.38–7.19 (m, 12H), 5.29 (br d,  $J$  = 5.1 Hz, 1H), 4.14–4.09 (m, 1H), 3.15–3.06 (m, 2H), 2.55 (d,  $J$  = 13.5 Hz, 1H), 2.44 (s, 3H), 2.39–2.32 (s, 1H), 1.60–1.52 (m, 1H);  $^{13}\text{C}$  NMR (125 MHz,  $\text{CDCl}_3$ )  $\delta$  176.1, 143.6, 137.5, 136.8, 135.1, 130.3, 130.0, 129.0, 128.9, 128.5, 127.5, 126.8, 126.4, 55.2, 46.7, 43.6, 41.6, 32.8, 21.7; HRMS (EI) calcd. for  $\text{C}_{25}\text{H}_{25}\text{NO}_4\text{S}_2$  [ $\text{M}^+$ ] 467.1225, found 467.1214.

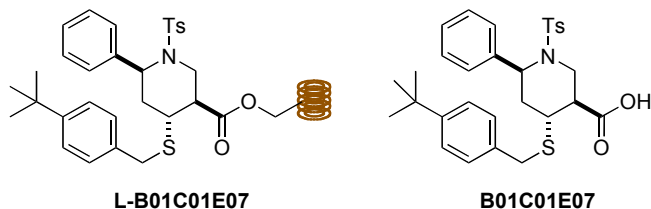

**4-(4-*tert*-Butylbenzylsulfanyl)-6-phenyl-1-(4-toluenesulfonyl)-piperidine-3-carboxylic Acid (B01C01E07).** According to the general procedure, lantern-bound 6-phenyl-1-(4-toluenesulfonyl)-1,2,5,6-tetrahydropyridine-3-carboxylate **L-B01C01** (1 lantern, 0.015 mmol) was reacted with 4-*tert*-butylbenzylmercaptan **E07** (0.28 mL, 1.5 mmol) in the presence of *n*-BuLi (10  $\mu$ L, 0.015 mmol) as a base for 8 days at 40 °C (conditions E). Cleavage afforded **B01C01E07** as a slightly yellow-colored oil. Crude yield: 7.9 mg (0.0143 mmol, 95%). IR (film)  $\nu$  2962, 1709, 1449, 1340, 1158, 1092, 968  $\text{cm}^{-1}$ ;  $^1\text{H}$  NMR (400 MHz,  $\text{CDCl}_3$ )  $\delta$  7.76 (d,  $J$  = 8.3 Hz, 2H), 7.35–7.31 (m, 4H), 7.25–7.20 (m, 3H), 7.19 (d,  $J$  = 8.3 Hz, 2H), 6.99 (d,  $J$  = 8.1 Hz, 2H), 5.24 (br d,  $J$  = 4.8 Hz, 1H), 4.09–4.05 (m, 1H), 3.63 (s, 2H), 3.00–2.95 (m, 1H), 3.81–3.73 (m, 1H), 2.44 (s, 3H), 2.36–2.33 (m, 2H), 1.73–1.64 (m, 1H), 1.31 (s, 9H);  $^{13}\text{C}$  NMR (125 MHz,  $\text{CDCl}_3$ )  $\delta$  175.8, 150.1, 143.7, 137.6, 136.8, 134.6, 130.0, 128.7, 128.5, 127.2, 126.9, 126.4, 125.4, 55.1, 47.4, 43.5, 38.2, 35.2, 34.4, 33.6, 31.2, 21.4; HRMS (EI) calcd. for  $\text{C}_{30}\text{H}_{35}\text{NO}_4\text{S}_2$  [ $\text{M}^+$ ] 537.2007, found 537.1965.

## Screening for the Selection of Building Blocks Used in the Library Synthesis

### Building Block Screening for the [3 + 2] Annulation

**Screening Imines Using Resin-Bound Allenoate L-A01:** Imines were reacted with allenoate **L-A01** according to the general procedure described previously. The data from the spectroscopic analyses ( $^1\text{H}$  NMR and LCMS spectra; see Supporting Information, Part C, for copies of spectra and chromatograms) of the cleaved annulation products **A01C(01–46)** are summarized in Table 3. Based on this screen, 30 imines (of 46) were chosen for inclusion in the library synthesis.

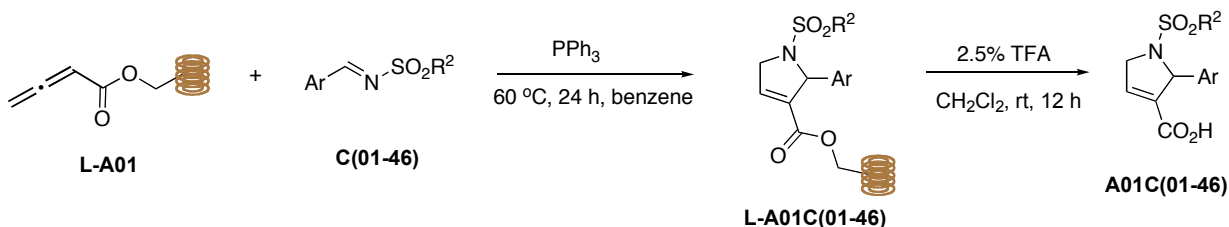

**Table 3.** Unsubstituted Lantern-Bound Allenoate + Imine Screening.

| entry | product                            |                 |               | yield <sup>a</sup><br>(%) | calcd. [M] | LCMS <sup>b</sup>                 |                         |               | incl. |
|-------|------------------------------------|-----------------|---------------|---------------------------|------------|-----------------------------------|-------------------------|---------------|-------|
|       | Ar                                 | R <sup>2</sup>  | no.           |                           |            | observed<br>[M + Na] <sup>+</sup> | retention<br>time (min) | purity<br>(%) |       |
| 1     | Ph                                 | <i>p</i> -tolyl | <b>A01C01</b> | 95                        | 343.09     | 366.0                             | 3.609                   | 89            | √     |
| 2     | 4-MeC <sub>6</sub> H <sub>4</sub>  | <i>p</i> -tolyl | <b>A01C02</b> | 97                        | 357.10     | 380.0                             | 3.744                   | 93            | √     |
| 3     | 4-EtC <sub>6</sub> H <sub>4</sub>  | <i>p</i> -tolyl | <b>A01C03</b> | 72                        | 371.12     | 394.0                             | 3.983                   | 99            | √     |
| 4     | 4-OMeC <sub>6</sub> H <sub>4</sub> | <i>p</i> -tolyl | <b>A01C04</b> | 46                        | 373.10     | N/A                               | N/A                     | N/A           | no    |



|    |                                                  |                                |               |     |        |       |       |     |    |
|----|--------------------------------------------------|--------------------------------|---------------|-----|--------|-------|-------|-----|----|
| 5  | 4-OEtC <sub>6</sub> H <sub>4</sub>               | <i>p</i> -tolyl                | <b>A01C05</b> | 60  | 387.11 | N/A   | N/A   | N/A | no |
| 6  | piperonal                                        | <i>p</i> -tolyl                | <b>A01C06</b> | 69  | 387.08 | 410.0 | 3.625 | 99  | √  |
| 7  | 4-Me <sub>2</sub> NC <sub>6</sub> H <sub>4</sub> | <i>p</i> -tolyl                | <b>A01C07</b> | 49  | 386.13 | N/A   | N/A   | N/A | no |
| 8  | 4-Et <sub>2</sub> NC <sub>6</sub> H <sub>4</sub> | <i>p</i> -tolyl                | <b>A01C08</b> | 51  | 414.16 | N/A   | N/A   | N/A | no |
| 9  | 4-CNC <sub>6</sub> H <sub>4</sub>                | <i>p</i> -tolyl                | <b>A01C09</b> | 99  | 368.08 | 391.0 | 3.627 | 99  | √  |
| 10 | 2-FC <sub>6</sub> H <sub>4</sub>                 | <i>p</i> -tolyl                | <b>A01C10</b> | 99  | 361.08 | 384.0 | 3.701 | 99  | √  |
| 11 | 4-ClC <sub>6</sub> H <sub>4</sub>                | <i>p</i> -tolyl                | <b>A01C11</b> | 99  | 377.05 | 400.0 | 3.885 | 99  | √  |
| 12 | 3-ClC <sub>6</sub> H <sub>4</sub>                | <i>p</i> -tolyl                | <b>A01C12</b> | 99  | 377.05 | 400.0 | 3.867 | 87  | √  |
| 13 | 3,4-ClC <sub>6</sub> H <sub>4</sub>              | <i>p</i> -tolyl                | <b>A01C13</b> | 95  | 411.01 | 434.9 | 4.035 | 100 | √  |
| 14 | 4-BrC <sub>6</sub> H <sub>4</sub>                | <i>p</i> -tolyl                | <b>A01C14</b> | 89  | 421.00 | 445.9 | 3.928 | 98  | √  |
| 15 | 3-BrC <sub>6</sub> H <sub>4</sub>                | <i>p</i> -tolyl                | <b>A01C15</b> | 95  | 421.00 | 445.9 | 3.904 | 97  | √  |
| 16 | 1-naphthyl                                       | <i>p</i> -tolyl                | <b>A01C16</b> | 63  | 393.10 | 416.0 | 3.907 | 96  | √  |
| 17 | 2-furyl                                          | <i>p</i> -tolyl                | <b>A01C17</b> | 68  | 333.07 | N/A   | N/A   | N/A | no |
| 18 | Ph                                               | <i>p</i> -NO <sub>2</sub> Ph   | <b>A01C18</b> | 95  | 374.06 | 397.0 | 3.680 | 99  | √  |
| 19 | Ph                                               | Me                             | <b>A01C19</b> | 110 | 267.06 | 290.0 | 2.874 | 84  | √  |
| 20 | 3,4-OMeC <sub>6</sub> H <sub>4</sub>             | <i>p</i> -tolyl                | <b>A01C20</b> | 45  | 403.11 | N/A   | N/A   | N/A | no |
| 21 | 2-thiophenyl                                     | <i>p</i> -tolyl                | <b>A01C21</b> | 67  | 349.04 | N/A   | N/A   | N/A | no |
| 22 | 4-Me-2-furyl                                     | <i>p</i> -tolyl                | <b>A01C22</b> | 46  | 347.08 | N/A   | N/A   | N/A | no |
| 23 | 4-FC <sub>6</sub> H <sub>4</sub>                 | <i>p</i> -tolyl                | <b>A01C23</b> | 90  | 361.08 | 384.0 | 3.738 | 99  | √  |
| 24 | 4- <i>i</i> -PrC <sub>6</sub> H <sub>4</sub>     | <i>p</i> -tolyl                | <b>A01C24</b> | 65  | 385.13 | 408.1 | 4.116 | 98  | √  |
| 25 | 3,4,5-OMeC <sub>6</sub> H <sub>4</sub>           | <i>p</i> -tolyl                | <b>A01C25</b> | 57  | 433.12 | N/A   | N/A   | N/A | no |
| 26 | 3-FC <sub>6</sub> H <sub>4</sub>                 | <i>p</i> -tolyl                | <b>A01C26</b> | 79  | 361.08 | 384.0 | 3.736 | 94  | √  |
| 27 | 4-ClC <sub>6</sub> H <sub>4</sub>                | <i>p</i> -ClPh                 | <b>A01C27</b> | 75  | 396.99 | 421.9 | 3.981 | 93  | √  |
| 28 | 4-ClC <sub>6</sub> H <sub>4</sub>                | Me                             | <b>A01C28</b> | 86  | 301.02 | 323.9 | 3.198 | 88  | √  |
| 29 | 4-ClC <sub>6</sub> H <sub>4</sub>                | Ph                             | <b>A01C29</b> | 97  | 363.03 | 386.0 | 3.738 | 96  | √  |
| 30 | 4-MeC <sub>6</sub> H <sub>4</sub>                | <i>p</i> -ClPh                 | <b>A01C30</b> | 100 | 377.05 | 400.0 | 3.943 | 98  | √  |
| 31 | 4-ClC <sub>6</sub> H <sub>4</sub>                | <i>o</i> -CO <sub>2</sub> MePh | <b>A01C31</b> | 112 | 421.04 | 444.0 | 3.716 | 100 | √  |
| 32 | 1-Methyl-pyrrolyl                                | <i>p</i> -tolyl                | <b>A01C32</b> | 24  | 346.10 | N/A   | N/A   | N/A | no |
| 33 | 3-MeC <sub>6</sub> H <sub>4</sub>                | <i>p</i> -tolyl                | <b>A01C33</b> | 87  | 357.10 | 380.0 | 3.798 | 99  | √  |
| 34 | 4-OMeC <sub>6</sub> H <sub>4</sub>               | <i>o</i> -CO <sub>2</sub> MePh | <b>A01C34</b> | 78  | 417.09 | N/A   | N/A   | N/A | no |
| 35 | 4-OMeC <sub>6</sub> H <sub>4</sub>               | Ph                             | <b>A01C35</b> | 63  | 359.08 | N/A   | N/A   | N/A | no |
| 36 | 4-MeC <sub>6</sub> H <sub>4</sub>                | <i>o</i> -NO <sub>2</sub> Ph   | <b>A01C36</b> | 142 | 388.07 | 411.0 | 3.741 | 95  | √  |
| 37 | 4-OMeC <sub>6</sub> H <sub>4</sub>               | <i>p</i> -ClPh                 | <b>A01C37</b> | 68  | 393.04 | N/A   | N/A   | N/A | no |
| 38 | 4-OMeC <sub>6</sub> H <sub>4</sub>               | <i>o</i> -tolyl                | <b>A01C38</b> | 34  | 373.10 | N/A   | N/A   | N/A | no |
| 39 | 3-OMeC <sub>6</sub> H <sub>4</sub>               | <i>p</i> -tolyl                | <b>A01C39</b> | 41  | 373.10 | N/A   | N/A   | N/A | no |
| 40 | 4-ClC <sub>6</sub> H <sub>4</sub>                | <i>o</i> -tolyl                | <b>A01C40</b> | 104 | 377.05 | 400.0 | 3.897 | 100 | √  |
| 41 | 4-MeC <sub>6</sub> H <sub>4</sub>                | <i>o</i> -tolyl                | <b>A01C41</b> | 80  | 357.10 | 380.0 | 3.852 | 90  | √  |
| 42 | 4-MeC <sub>6</sub> H <sub>4</sub>                | <i>o</i> -CO <sub>2</sub> MePh | <b>A01C42</b> | 50  | 401.09 | 424.0 | 3.659 | 84  | √  |
| 43 | 4-MeC <sub>6</sub> H <sub>4</sub>                | Ph                             | <b>A01C43</b> | 97  | 343.09 | 366.0 | 3.681 | 94  | √  |
| 44 | 4-MeC <sub>6</sub> H <sub>4</sub>                | <i>p</i> -NO <sub>2</sub> Ph   | <b>A01C44</b> | 81  | 388.07 | 411.0 | 3.801 | 96  | √  |
| 45 | 4-MeC <sub>6</sub> H <sub>4</sub>                | <i>m</i> -NO <sub>2</sub> Ph   | <b>A01C45</b> | 68  | 388.07 | N/A   | N/A   | N/A | no |
| 46 | 4-MeC <sub>6</sub> H <sub>4</sub>                | Me                             | <b>A01C46</b> | 48  | 281.07 | 304.0 | 3.017 | 86  | √  |

<sup>a</sup> Crude yield after cleavage.

<sup>b</sup> Short 6-min method; purity observed at λ 210 nm.

**Screening γ-Substituted Allenic Acids Using *N*-Tosyltolualdimine C02:** Allenic acids were loaded and reacted with imine **C02** according to the general procedure on pages S18 and S19. The data from the spectroscopic analyses (<sup>1</sup>H NMR and LCMS spectra; see Supporting Information, Part C, for copies of spectra and chromatograms) of the

cleaved annulation products **A(02–11)C02** are summarized in Table 4. Based on these results, all of the  $\gamma$ -substituted allenic acids were chosen for inclusion in the library synthesis.

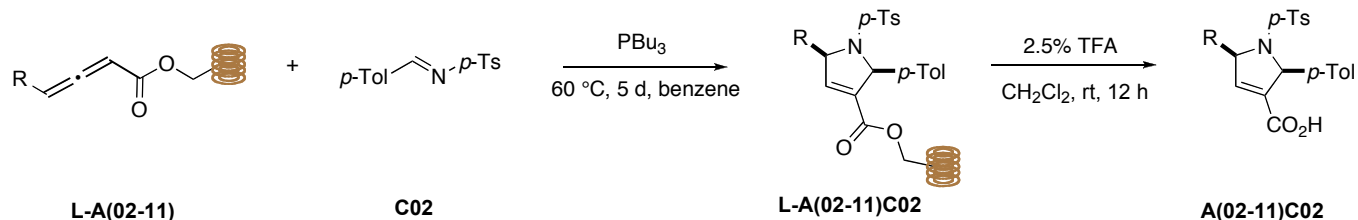

**Table 4.**  $\gamma$ -Substituted Allenic Acid Screening.

| entry | product          |               | NMR       |                        |       |            | LCMS <sup>b</sup>              |                      |            |       |
|-------|------------------|---------------|-----------|------------------------|-------|------------|--------------------------------|----------------------|------------|-------|
|       | R                | no.           | conv. (%) | yield (%) <sup>a</sup> | dr    | calcd. [M] | observed [M + Na] <sup>+</sup> | retention time (min) | purity (%) | incl. |
| 1     | Me               | <b>A02C02</b> | >99       | 100                    | 92:8  | 371.12     | 394.1                          | 3.871                | 80         | √     |
| 2     | <i>t</i> -Bu     | <b>A03C02</b> | >99       | 80                     | 99:1  | 413.17     | 436.1                          | 4.383                | 100        | √     |
| 3     | Ph               | <b>A04C02</b> | >99       | 50                     | 99:1  | 433.13     | 456.1                          | 4.146                | 87         | √     |
| 4     | Et               | <b>A05C02</b> | >99       | 99                     | 95:5  | 385.13     | 408.1                          | 4.090                | 89         | √     |
| 5     | <i>i</i> -Pr     | <b>A06C02</b> | >99       | 92                     | 99:1  | 399.15     | 422.1                          | 4.158                | 83         | √     |
| 6     | <i>n</i> -Pr     | <b>A07C02</b> | >99       | 102                    | 99:1  | 399.15     | 422.1                          | 4.176                | 72         | √     |
| 7     | <i>n</i> -Bu     | <b>A08C02</b> | >99       | 77                     | 99:1  | 413.17     | 436.1                          | 4.425                | 89         | √     |
| 8     | <i>n</i> -pentyl | <b>A09C02</b> | >99       | 66                     | 99:1  | 427.18     | 450.1                          | 4.516                | 74         | √     |
| 9     | <i>n</i> -hexyl  | <b>A10C02</b> | >99       | 85                     | 83:17 | 441.20     | 464.1                          | 4.683                | 49         | √     |
| 10    | cyp-Me           | <b>A11C02</b> | >99       | 70                     | 92:8  | 439.18     | 462.1                          | 4.547                | 87         | √     |

<sup>a</sup> Crude yield after cleavage.

<sup>b</sup> Short 6 min method, purity observed at  $\lambda$  210 nm.

**Screening Imines Using Resin-Bound Allenolate L-A05:** Imines were reacted with allenolate **L-A05** according to the general procedure in page S20. The analytical data (<sup>1</sup>H NMR and LCMS spectra; see Supporting Information, Part C, for copies of spectra and chromatograms) of the cleaved annulation products **A05C(01–46)** are summarized in Table 5. Based on this screen, 21 imines (of 46) were chosen for inclusion in the library synthesis.

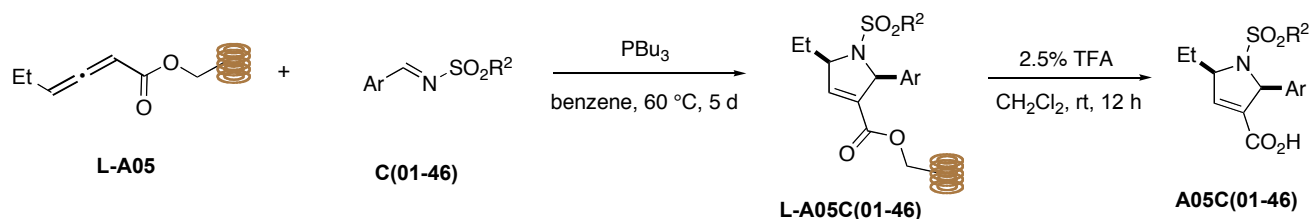

**Table 5.** Imine Screening in the [3 + 2] Annulation Using **L-A05**.

| entry | product                                          |                 |               | NMR       |                        |       | LCMS <sup>b</sup> |                            |                 |            |                |
|-------|--------------------------------------------------|-----------------|---------------|-----------|------------------------|-------|-------------------|----------------------------|-----------------|------------|----------------|
|       | Ar                                               | R <sup>2</sup>  | no.           | conv. (%) | yield <sup>a</sup> (%) | dr    | calcd. [M]        | obs. [M + Na] <sup>+</sup> | ret. time (min) | purity (%) | incl.          |
| 1     | Ph                                               | <i>p</i> -tolyl | <b>A05C01</b> | >99       | 99                     | 99:9  | 371.12            | 394.1                      | 3.890           | 66         | √ <sup>c</sup> |
| 2     | 4-MeC <sub>6</sub> H <sub>4</sub>                | <i>p</i> -tolyl | <b>A05C02</b> | >99       | 99                     | 95:5  | 385.13            | 408.1                      | 4.090           | 89         | √              |
| 3     | 4-EtC <sub>6</sub> H <sub>4</sub>                | <i>p</i> -tolyl | <b>A05C03</b> | >99       | 100                    | 98:2  | 399.15            | 422.1                      | 4.237           | 83         | √              |
| 4     | 4-MeOC <sub>6</sub> H <sub>4</sub>               | <i>p</i> -tolyl | <b>A05C04</b> | >99       | 75                     | mess  | 401.13            | N/A                        | N/A             | N/A        | no             |
| 5     | 4-EtOC <sub>6</sub> H <sub>4</sub>               | <i>p</i> -tolyl | <b>A05C05</b> | >99       | 64                     | mess  | 415.15            | N/A                        | N/A             | N/A        | no             |
| 6     | piperonal                                        | <i>p</i> -tolyl | <b>A05C06</b> | >99       | 87                     | >91:1 | 415.11            | 438.0                      | 3.919           | 100        | √              |
| 7     | 4-Me <sub>2</sub> NC <sub>6</sub> H <sub>4</sub> | <i>p</i> -tolyl | <b>A05C07</b> | trace     | 58                     | mess  | 414.16            | N/A                        | N/A             | N/A        | no             |
| 8     | 4-Et <sub>2</sub> NC <sub>6</sub> H <sub>4</sub> | <i>p</i> -tolyl | <b>A05C08</b> | trace     | 63                     | mess  | 442.19            | N/A                        | N/A             | N/A        | no             |



|    |                                              |                                |               |        |     |       |        |                    |       |     |                |
|----|----------------------------------------------|--------------------------------|---------------|--------|-----|-------|--------|--------------------|-------|-----|----------------|
| 9  | 4-NCC <sub>6</sub> H <sub>4</sub>            | <i>p</i> -tolyl                | <b>A05C09</b> | >99    | 40  | 97:3  | 396.11 | 419.0              | 3.921 | 100 | √              |
| 10 | 2-FC <sub>6</sub> H <sub>4</sub>             | <i>p</i> -tolyl                | <b>A05C10</b> | >99    | 106 | 100:0 | 389.11 | 412.0              | 3.969 | 71  | √              |
| 11 | 4-ClC <sub>6</sub> H <sub>4</sub>            | <i>p</i> -tolyl                | <b>A05C11</b> | >99    | 66  | 96:4  | 405.08 | 406.1 <sup>d</sup> | 4.132 | 95  | √              |
| 12 | 3-ClC <sub>6</sub> H <sub>4</sub>            | <i>p</i> -tolyl                | <b>A05C12</b> | >99    | 53  | 93:7  | 405.08 | 428.0              | 4.159 | 79  | √              |
| 13 | 3,4-ClC <sub>6</sub> H <sub>4</sub>          | <i>p</i> -tolyl                | <b>A05C13</b> | >99    | 85  | 94:6  | 439.04 | 440.0 <sup>d</sup> | 4.306 | 85  | √              |
| 14 | 4-BrC <sub>6</sub> H <sub>4</sub>            | <i>p</i> -tolyl                | <b>A05C14</b> | >99    | 98  | 93:7  | 449.03 | 474.0*             | 4.217 | 87  | √              |
| 15 | 3-BrC <sub>6</sub> H <sub>4</sub>            | <i>p</i> -tolyl                | <b>A05C15</b> | >99    | 70  | mess  | 449.03 | 472.2              | 4.201 | 66  | no             |
| 16 | 1-naphthyl                                   | <i>p</i> -tolyl                | <b>A05C16</b> | >99    | 79  | 100:0 | 421.13 | 444.0              | 4.173 | 95  | √              |
| 17 | 2-furyl                                      | <i>p</i> -tolyl                | <b>A05C17</b> | no rxn | 56  | mess  | 361.10 | N/A                | N/A   | N/A | no             |
| 18 | Ph                                           | <i>p</i> -NO <sub>2</sub> Ph   | <b>A05C18</b> | mess   | 68  | mess  | 402.09 | N/A                | N/A   | N/A | no             |
| 19 | Ph                                           | Me                             | <b>A05C19</b> | >99    | 140 | 100:0 | 295.09 | 318.0              | 3.327 | 57  | √ <sup>c</sup> |
| 20 | 3,4-MeOC <sub>6</sub> H <sub>4</sub>         | <i>p</i> -tolyl                | <b>A05C20</b> | >99    | 65  |       | 431.14 | 454.0              | 3.767 | 80  | √              |
| 21 | 2-thiophenyl                                 | <i>p</i> -tolyl                | <b>A05C21</b> | mess   | 64  | mess  | 377.08 | N/A                | N/A   | N/A | no             |
| 22 | 4-Me-2-furyl                                 | <i>p</i> -tolyl                | <b>A05C22</b> | no rxn | 67  | -     | 375.11 | N/A                | N/A   | N/A | no             |
| 23 | 4-FC <sub>6</sub> H <sub>4</sub>             | <i>p</i> -tolyl                | <b>A05C23</b> | >99    | 89  | 92:8  | 389.11 | 412.0              | 4.026 | 92  | √              |
| 24 | 4- <i>i</i> -PrC <sub>6</sub> H <sub>4</sub> | <i>p</i> -tolyl                | <b>A05C24</b> | >99    | 92  | 94:6  | 413.17 | 436.1              | 4.378 | 88  | √              |
| 25 | 3,4,5-MeOC <sub>6</sub> H <sub>4</sub>       | <i>p</i> -tolyl                | <b>A05C25</b> | mess   | 38  | mess  | 461.15 | N/A                | N/A   | N/A | no             |
| 26 | 3-FC <sub>6</sub> H <sub>4</sub>             | <i>p</i> -tolyl                | <b>A05C26</b> | >99    | 60  | 96:4  | 389.11 | 412.0              | 4.028 | 78  | √              |
| 27 | 4-ClC <sub>6</sub> H <sub>4</sub>            | <i>p</i> -ClPh                 | <b>A05C27</b> | >99    | 81  | 98:2  | 425.03 | 447.9              | 4.268 | 75  | √              |
| 28 | 4-ClC <sub>6</sub> H <sub>4</sub>            | Me                             | <b>A05C28</b> | mess   | 95  | mess  | 329.05 | N/A                | N/A   | N/A | no             |
| 29 | 4-ClC <sub>6</sub> H <sub>4</sub>            | Ph                             | <b>A05C29</b> | >99    | 91  |       | 391.06 | 414.0              | 4.045 | 86  | √              |
| 30 | 4-MeC <sub>6</sub> H <sub>4</sub>            | <i>p</i> -ClPh                 | <b>A05C30</b> | >99    | 79  | 93:7  | 405.08 | 428.0              | 4.220 | 78  | √              |
| 31 | 4-ClC <sub>6</sub> H <sub>4</sub>            | <i>o</i> -CO <sub>2</sub> MePh | <b>A05C31</b> | mess   | 71  | mess  | 449.07 | 472.0              | 3.998 | 54  | no             |
| 32 | 1-Methyl-pyrrolyl                            | <i>p</i> -tolyl                | <b>A05C32</b> | no rxn | 23  | -     | 374.13 | N/A                | N/A   | N/A | no             |
| 33 | 3-MeC <sub>6</sub> H <sub>4</sub>            | <i>p</i> -tolyl                | <b>A05C33</b> | >99    | 92  | 92:8  | 385.13 | 408.1              | 4.092 | 91  | √              |
| 34 | 4-MeOC <sub>6</sub> H <sub>4</sub>           | <i>o</i> -CO <sub>2</sub> MePh | <b>A05C34</b> | mess   | nd  | mess  | 445.12 | N/A                | N/A   | N/A | no             |
| 35 | 4-MeOC <sub>6</sub> H <sub>4</sub>           | Ph                             | <b>A05C35</b> | mess   | nd  | mess  | 387.11 | N/A                | N/A   | N/A | no             |
| 36 | 4-MeC <sub>6</sub> H <sub>4</sub>            | <i>o</i> -NO <sub>2</sub> Ph   | <b>A05C36</b> | mess   | nd  | mess  | 416.10 | N/A                | N/A   | N/A | no             |
| 37 | 4-MeOC <sub>6</sub> H <sub>4</sub>           | <i>p</i> -ClPh                 | <b>A05C37</b> | mess   | nd  | mess  | 421.08 | N/A                | N/A   | N/A | no             |
| 38 | 4-MeOC <sub>6</sub> H <sub>4</sub>           | <i>o</i> -tolyl                | <b>A05C38</b> | mess   | nd  | mess  | 401.13 | N/A                | N/A   | N/A | no             |
| 39 | 3-MeOC <sub>6</sub> H <sub>4</sub>           | <i>p</i> -tolyl                | <b>A05C39</b> | mess   | nd  | mess  | 401.13 | N/A                | N/A   | N/A | no             |
| 40 | 4-ClC <sub>6</sub> H <sub>4</sub>            | <i>o</i> -tolyl                | <b>A05C40</b> | >99    | 108 |       | 405.08 | 406.1 <sup>d</sup> | 4.181 | 67  | √ <sup>c</sup> |
| 41 | 4-MeC <sub>6</sub> H <sub>4</sub>            | <i>o</i> -tolyl                | <b>A05C41</b> | >99    | 105 | 100:0 | 385.13 | 386.1 <sup>d</sup> | 4.113 | 55  | √ <sup>c</sup> |
| 42 | 4-MeC <sub>6</sub> H <sub>4</sub>            | <i>o</i> -CO <sub>2</sub> MePh | <b>A05C42</b> | mess   | nd  | mess  | 429.12 | N/A                | N/A   | N/A | no             |
| 43 | 4-MeC <sub>6</sub> H <sub>4</sub>            | Ph                             | <b>A05C43</b> | >99    | 100 |       | 371.12 | 394.1              | 3.883 | 70  | no             |
| 44 | 4-MeC <sub>6</sub> H <sub>4</sub>            | <i>p</i> -NO <sub>2</sub> Ph   | <b>A05C44</b> | mess   | nd  | mess  | 416.10 | N/A                | N/A   | N/A | no             |
| 45 | 4-MeC <sub>6</sub> H <sub>4</sub>            | <i>m</i> -NO <sub>2</sub> Ph   | <b>A05C45</b> | mess   | nd  | mess  | 416.10 | N/A                | N/A   | N/A | no             |
| 46 | 4-MeC <sub>6</sub> H <sub>4</sub>            | Me                             | <b>A05C46</b> | >99    | 97  |       | 309.10 | 332.1              | 3.388 | 57  | no             |

<sup>a</sup> Crude yield after cleavage.

<sup>b</sup> Short 6-min method; purity observed at λ 210 nm.

<sup>c</sup> Selection based on <sup>1</sup>H NMR spectrum.

<sup>d</sup> [M + H]<sup>+</sup>

## Building Block Screening for the [4 + 2] Annulation

**Screening Imines Using Resin-Bound Allenoate L-B01.** Imines **C(01–46)** were reacted with allenoate **L-B01** according to the general procedure described previously. The analytical data ( $^1\text{H}$  NMR and LCMS spectra; see Supporting Information, Part D, for copies of spectra and chromatograms) of the cleaved annulation products **B01C(01–46)** are summarized in Table 6. Based on these results, 25 imines (of 46) were chosen for inclusion in the library synthesis.

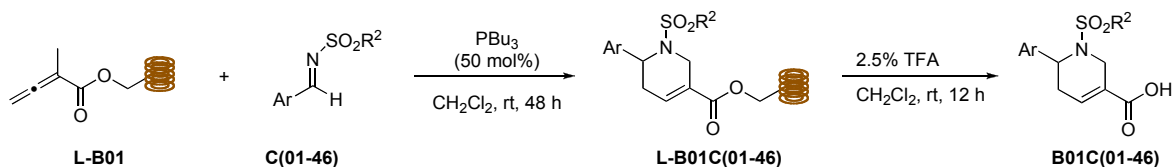

**Table 6.** Screening Imines **C(01–46)** Using Resin-Bound Allenoate **L-B01**.

| entry | imine | product                                          |                                |               | yield <sup>a</sup><br>(%) | calcd.<br>[M] | LCMS <sup>b</sup>       |                                   |               | incl. |
|-------|-------|--------------------------------------------------|--------------------------------|---------------|---------------------------|---------------|-------------------------|-----------------------------------|---------------|-------|
|       |       | Ar                                               | SO <sub>2</sub> R <sup>2</sup> | no.           |                           |               | retention<br>time (min) | observed<br>[M + Na] <sup>+</sup> | purity<br>(%) |       |
| 1     | C01   | Ph                                               | Ts                             | <b>B01C01</b> | 108                       | 357.10        | 3.91                    | 380.0                             | 85            | ✓     |
| 2     | C02   | 4-MeC <sub>6</sub> H <sub>4</sub>                | Ts                             | <b>B01C02</b> | 102                       | 371.12        | 4.02                    | 394.0                             | 99            | ✓     |
| 3     | C03   | 4-EtC <sub>6</sub> H <sub>4</sub>                | Ts                             | <b>B01C03</b> | 118                       | 385.13        | 4.18                    | 408.1                             | 99            | ✓     |
| 4     | C04   | 4-MeOC <sub>6</sub> H <sub>4</sub>               | Ts                             | <b>B01C04</b> | 95                        | 387.11        | 3.82                    | 410.1                             | 68            | ✓     |
| 5     | C05   | 4-EtOC <sub>6</sub> H <sub>4</sub>               | Ts                             | <b>B01C05</b> | 80                        | 401.13        | 4.09                    | 424.0                             | 99            | ✓     |
| 6     | C06   | piperonyl                                        | Ts                             | <b>B01C06</b> | 95                        | 401.09        | 3.82                    | 424.0                             | 90            | ✓     |
| 7     | C07   | 4-Me <sub>2</sub> NC <sub>6</sub> H <sub>4</sub> | Ts                             | <b>B01C07</b> | 68                        | 400.15        | 3.38                    | 401.1 <sup>c</sup>                | 73            | no    |
| 8     | C08   | 4-Et <sub>2</sub> NC <sub>6</sub> H <sub>4</sub> | Ts                             | <b>B01C08</b> | 62                        | 428.18        | nd                      | nd                                | nd            | no    |
| 9     | C09   | 4-NCC <sub>6</sub> H <sub>4</sub>                | Ts                             | <b>B01C09</b> | 82                        | 382.10        | 3.74                    | 405.0                             | 50            | no    |
| 10    | C10   | 2-FC <sub>6</sub> H <sub>4</sub>                 | Ts                             | <b>B01C10</b> | 100                       | 375.09        | 3.85                    | 398.0                             | 95            | ✓     |
| 11    | C11   | 4-ClC <sub>6</sub> H <sub>4</sub>                | Ts                             | <b>B01C11</b> | 87                        | 391.06        | 4.10                    | 414.0                             | 82            | no    |
| 12    | C12   | 3-ClC <sub>6</sub> H <sub>4</sub>                | Ts                             | <b>B01C12</b> | 100                       | 391.06        | 3.99                    | 414.0                             | 80            | ✓     |
| 13    | C13   | 3,4-di-ClC <sub>6</sub> H <sub>4</sub>           | Ts                             | <b>B01C13</b> | 99                        | 425.03        | 4.25                    | 448.0                             | 75            | no    |
| 14    | C14   | 4-BrC <sub>6</sub> H <sub>4</sub>                | Ts                             | <b>B01C14</b> | 84                        | 435.01        | 4.13                    | 460.0                             | 77            | no    |
| 15    | C15   | 3-BrC <sub>6</sub> H <sub>4</sub>                | Ts                             | <b>B01C15</b> | 90                        | 435.01        | 4.10                    | 457.9                             | 77            | no    |
| 16    | C16   | 1-naphthyl                                       | Ts                             | <b>B01C16</b> | 95                        | 407.12        | 4.15                    | 430.0                             | 95            | ✓     |
| 17    | C17   | 2-furyl                                          | Ts                             | <b>B01C17</b> | 56                        | 347.08        | nd                      | nd                                | nd            | no    |
| 18    | C18   | Ph                                               | Ns                             | <b>B01C18</b> | 50                        | 388.07        | nd                      | nd                                | nd            | no    |
| 19    | C19   | Ph                                               | Ms                             | <b>B01C19</b> | 85                        | 281.07        | nd                      | nd                                | nd            | no    |
| 20    | C20   | 3,4-di-MeOC <sub>6</sub> H <sub>4</sub>          | Ts                             | <b>B01C20</b> | 83                        | 417.12        | 3.66                    | 440.0                             | 91            | ✓     |
| 21    | C21   | 2-thiophene                                      | Ts                             | <b>B01C21</b> | 53                        | 363.06        | 3.80                    | 386.0                             | 99            | ✓     |
| 22    | C22   | 5-methyl-2-furyl                                 | Ts                             | <b>B01C22</b> | 55                        | 361.10        | nd                      | nd                                | nd            | no    |
| 23    | C23   | 4-FC <sub>6</sub> H <sub>4</sub>                 | Ts                             | <b>B01C23</b> | 89                        | 375.09        | 3.91                    | 398.0                             | 82            | no    |
| 24    | C24   | 4- <i>i</i> -PrC <sub>6</sub> H <sub>4</sub>     | Ts                             | <b>B01C24</b> | 77                        | 399.15        | 4.33                    | 422.1                             | 96            | ✓     |
| 25    | C25   | 3,4,5-tri-MeOC <sub>6</sub> H <sub>4</sub>       | Ts                             | <b>B01C25</b> | 61                        | 447.14        | 3.67                    | 470.0                             | 80            | ✓     |
| 26    | C26   | 3-FC <sub>6</sub> H <sub>4</sub>                 | Ts                             | <b>B01C26</b> | 103                       | 375.09        | 3.90                    | 398.0                             | 78            | no    |
| 27    | C27   | 4-ClC <sub>6</sub> H <sub>4</sub>                | 4ClBs                          | <b>B01C27</b> | 103                       | 411.01        | nd                      | nd                                | nd            | no    |
| 28    | C28   | 4-ClC <sub>6</sub> H <sub>4</sub>                | Ms                             | <b>B01C28</b> | 122                       | 315.03        | nd                      | nd                                | nd            | no    |
| 29    | C29   | 4-ClC <sub>6</sub> H <sub>4</sub>                | Bs                             | <b>B01C29</b> | 115                       | 377.05        | nd                      | nd                                | nd            | no    |
| 30    | C30   | 4-MeC <sub>6</sub> H <sub>4</sub>                | 4ClBs                          | <b>B01C30</b> | 102                       | 391.06        | 4.10                    | 414.0                             | 87            | ✓     |
| 31    | C31   | 4-ClC <sub>6</sub> H <sub>4</sub>                | 2MCBs                          | <b>B01C31</b> | 67                        | 435.05        | 3.90                    | 458.0                             | 85            | no    |
| 32    | C32   | 1-Me-2-pyrrole                                   | Ts                             | <b>B01C32</b> | 31                        | 360.11        | nd                      | nd                                | nd            | no    |
| 33    | C33   | 3-MeC <sub>6</sub> H <sub>4</sub>                | Ts                             | <b>B01C33</b> | 99                        | 371.12        | 4.04                    | 394.0                             | 77            | ✓     |
| 34    | C34   | 4-MeOC <sub>6</sub> H <sub>4</sub>               | 2MCBs                          | <b>B01C34</b> | 68                        | 431.10        | 3.69                    | 454.0                             | 87            | ✓     |
| 35    | C35   | 4-MeOC <sub>6</sub> H <sub>4</sub>               | Bs                             | <b>B01C35</b> | 93                        | 373.10        | 3.69                    | 396.0                             | 94            | ✓     |
| 36    | C36   | 4-MeC <sub>6</sub> H <sub>4</sub>                | 2Ns                            | <b>B01C36</b> | 61                        | 402.09        | 3.89                    | 403.1 <sup>c</sup>                | 95            | ✓     |
| 37    | C37   | 4-MeOC <sub>6</sub> H <sub>4</sub>               | 4ClBs                          | <b>B01C37</b> | 103                       | 407.06        | 3.93                    | 430.0                             | 92            | ✓     |
| 38    | C38   | 4-MeOC <sub>6</sub> H <sub>4</sub>               | 2Ts                            | <b>B01C38</b> | 105                       | 387.11        | 3.89                    | 410.0                             | 84            | ✓     |
| 39    | C39   | 3-MeOC <sub>6</sub> H <sub>4</sub>               | Ts                             | <b>B01C39</b> | 57                        | 387.11        | 3.84                    | 410.1                             | 87            | ✓     |

|    |     |                                   |       |               |    |        |      |       |    |    |
|----|-----|-----------------------------------|-------|---------------|----|--------|------|-------|----|----|
| 40 | C40 | 4-ClC <sub>6</sub> H <sub>4</sub> | 2Ts   | <b>B01C40</b> | 92 | 391.06 | 4.12 | 414.0 | 98 | ✓  |
| 41 | C41 | 4-MeC <sub>6</sub> H <sub>4</sub> | 2Ts   | <b>B01C41</b> | 83 | 371.12 | 4.07 | 394.1 | 90 | ✓  |
| 42 | C42 | 4-MeC <sub>6</sub> H <sub>4</sub> | 2MCBs | <b>B01C42</b> | 90 | 415.11 | 3.86 | 438.0 | 93 | ✓  |
| 43 | C43 | 4-MeC <sub>6</sub> H <sub>4</sub> | Bs    | <b>B01C43</b> | 75 | 357.10 | 3.91 | 380.0 | 90 | ✓  |
| 44 | C44 | 4-MeC <sub>6</sub> H <sub>4</sub> | 4Ns   | <b>B01C44</b> | 70 | 402.09 | nd   | nd    | nd | no |
| 45 | C45 | 4-MeC <sub>6</sub> H <sub>4</sub> | 3Ns   | <b>B01C45</b> | 51 | 402.09 | nd   | nd    | nd | no |
| 46 | C46 | 4-MeC <sub>6</sub> H <sub>4</sub> | Ms    | <b>B01C46</b> | 97 | 295.09 | 3.39 | 318.0 | 55 | no |

<sup>a</sup> Crude yield after cleavage.

<sup>b</sup> Short 6-min method; purity observed at  $\lambda$  210 nm.

<sup>c</sup> [M + H<sup>+</sup>].

**Screening  $\alpha$ -Substituted Allenic Acids Using *N*-Tosyltolualdimine (C02):** Allenic acids **B(02–12)** were loaded and reacted with imine **C02** according to the general procedures. The data from spectroscopic analyses (<sup>1</sup>H NMR and LCMS spectra; see Supporting Information, Part D, for copies of spectra and chromatograms) of the cleaved annulation products **B(02–12)C02** are summarized in Table 7. Based on this screen, all of the  $\alpha$ -substituted allenic acids were chosen for inclusion in the library synthesis.

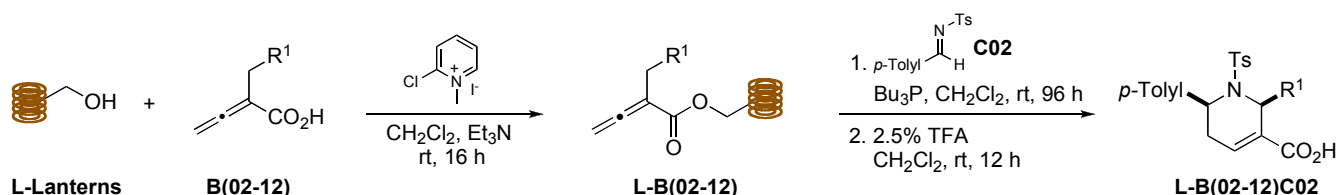

**Table 7.** Screen Data for Allenic Acids **B(02–12)**

| entry | allenic acid | product                                       |               | NMR  |                        |            | LCMS <sup>b</sup>    |                                |            |       |
|-------|--------------|-----------------------------------------------|---------------|------|------------------------|------------|----------------------|--------------------------------|------------|-------|
|       |              | R <sup>1</sup>                                | no.           | d.r. | yield <sup>a</sup> (%) | calcd. [M] | retention time (min) | observed [M + Na] <sup>+</sup> | purity (%) | incl. |
| 1     | B02          | Ph                                            | <b>B02C02</b> | 93:7 | 104                    | 447.15     | 4.36                 | 470.1                          | 85         | ✓     |
| 2     | B03          | 2-F-C <sub>6</sub> H <sub>4</sub>             | <b>B03C02</b> | 99:1 | 110                    | 465.14     | 4.33                 | 488.1                          | 95         | ✓     |
| 3     | B04          | 3-F-C <sub>6</sub> H <sub>4</sub>             | <b>B04C02</b> | 95:5 | 93                     | 465.14     | 4.39                 | 488.0                          | 98         | ✓     |
| 4     | B05          | 3-Cl-C <sub>6</sub> H <sub>4</sub>            | <b>B05C02</b> | 96:4 | 104                    | 481.11     | 4.52                 | 504.0                          | 95         | ✓     |
| 5     | B06          | 3-Br-C <sub>6</sub> H <sub>4</sub>            | <b>B06C02</b> | 96:4 | 113                    | 525.06     | 4.56                 | 548.0                          | 93         | ✓     |
| 6     | B07          | 3-Me-C <sub>6</sub> H <sub>4</sub>            | <b>B07C02</b> | 95:5 | 92                     | 461.17     | 4.48                 | 484.1                          | 95         | ✓     |
| 7     | B08          | 4-F-C <sub>6</sub> H <sub>4</sub>             | <b>B08C02</b> | 94:6 | 100                    | 465.14     | 4.40                 | 488.1                          | 98         | ✓     |
| 8     | B09          | 4-Cl-C <sub>6</sub> H <sub>4</sub>            | <b>B09C02</b> | 95:5 | 112                    | 481.11     | 4.55                 | 504.0                          | 93         | ✓     |
| 9     | B10          | 4-Br-C <sub>6</sub> H <sub>4</sub>            | <b>B10C02</b> | 96:4 | 110                    | 525.06     | 4.59                 | 548.0                          | 89         | ✓     |
| 10    | B11          | 4-Me-C <sub>6</sub> H <sub>4</sub>            | <b>B11C02</b> | 95:5 | 111                    | 461.17     | 4.49                 | 484.1                          | 91         | ✓     |
| 11    | B12          | 4- <i>t</i> -Bu-C <sub>6</sub> H <sub>4</sub> | <b>B12C02</b> | 94:6 | 98                     | 503.21     | 4.87                 | 526.1                          | 99         | ✓     |

<sup>a</sup> Crude yield after cleavage.

<sup>b</sup> Short 6-min method; purity observed at  $\lambda$  210 nm.

**Screening Imines Using Resin-Bound Allenate L-B05:** Imines **C(01–46)** were reacted with allenate **L-B05** according to the general procedure on page S20. The analytical data (<sup>1</sup>H NMR and LCMS spectra; see Supporting Information, Part D, for copies of spectra and chromatograms) of the cleaved annulation products **B05C(01–46)** are summarized in Table 8. Based on these results, 31 imines (of 46) were chosen for inclusion in the library synthesis.

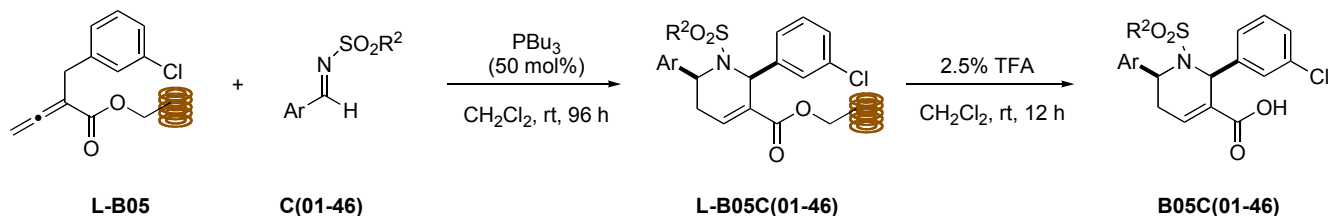

**Table 8.** Screening Imines Using Allenate **L-B05**.

| entry | imine | product                                          |                |               | NMR   |                           | LCMS <sup>b</sup> |                         |                                   |               | incl. |
|-------|-------|--------------------------------------------------|----------------|---------------|-------|---------------------------|-------------------|-------------------------|-----------------------------------|---------------|-------|
|       |       | Ar                                               | R <sup>2</sup> | no.           | d.r.  | yield <sup>a</sup><br>(%) | calcd.<br>[M]     | retention<br>time (min) | observed<br>[M + Na] <sup>+</sup> | purity<br>(%) |       |
| 1     | C01   | Ph                                               | Ts             | <b>B05C01</b> | 98:2  | 63                        | 467.10            | 4.36                    | 468.1 <sup>c</sup>                | 86            | ✓     |
| 2     | C02   | 4-MeC <sub>6</sub> H <sub>4</sub>                | Ts             | <b>B05C02</b> | 96:4  | 59                        | 481.11            | 4.49                    | 504.0                             | 98            | ✓     |
| 3     | C03   | 4-EtC <sub>6</sub> H <sub>4</sub>                | Ts             | <b>B05C03</b> | 96:4  | 149                       | 495.13            | 4.69                    | 518.0                             | 86            | ✓     |
| 4     | C04   | 4-MeOC <sub>6</sub> H <sub>4</sub>               | Ts             | <b>B05C04</b> | 96:4  | 54                        | 497.11            | 4.29                    | 520.0                             | 99            | ✓     |
| 5     | C05   | 4-EtOC <sub>6</sub> H <sub>4</sub>               | Ts             | <b>B05C05</b> | 96:4  | 52                        | 511.12            | 4.40                    | 534.0                             | 98            | ✓     |
| 6     | C06   | piperonyl                                        | Ts             | <b>B05C06</b> | 92:8  | 61                        | 511.09            | 4.17                    | 534.0                             | 98            | ✓     |
| 7     | C07   | 4-Me <sub>2</sub> NC <sub>6</sub> H <sub>4</sub> | Ts             | <b>B05C07</b> | 99:1  | 52                        | 510.14            | 3.80                    | 511.1 <sup>c</sup>                | 37            | no    |
| 8     | C08   | 4-Et <sub>2</sub> NC <sub>6</sub> H <sub>4</sub> | Ts             | <b>B05C08</b> | nd    | nd                        | 538.17            | nd                      | nd                                | nd            | no    |
| 9     | C09   | 4-NCC <sub>6</sub> H <sub>4</sub>                | Ts             | <b>B05C09</b> | 94:6  | 76                        | 492.09            | 4.12                    | 515.0                             | 99            | ✓     |
| 10    | C10   | 2-FC <sub>6</sub> H <sub>4</sub>                 | Ts             | <b>B05C10</b> | 94:6  | 84                        | 485.09            | 4.24                    | 508.0                             | 98            | ✓     |
| 11    | C11   | 4-ClC <sub>6</sub> H <sub>4</sub>                | Ts             | <b>B05C11</b> | 96:4  | 76                        | 501.06            | 4.50                    | 524.0                             | 97            | ✓     |
| 12    | C12   | 3-ClC <sub>6</sub> H <sub>4</sub>                | Ts             | <b>B05C12</b> | 96:4  | 81                        | 501.06            | 4.46                    | 524.0                             | 98            | ✓     |
| 13    | C13   | 3,4-di-ClC <sub>6</sub> H <sub>4</sub>           | Ts             | <b>B05C13</b> | 95:5  | 75                        | 535.02            | 4.61                    | 553.3                             | 99            | ✓     |
| 14    | C14   | 4-BrC <sub>6</sub> H <sub>4</sub>                | Ts             | <b>B05C14</b> | 95:5  | 66                        | 545.01            | 4.60                    | 568.0                             | 99            | no    |
| 15    | C15   | 3-BrC <sub>6</sub> H <sub>4</sub>                | Ts             | <b>B05C15</b> | 97:3  | 62                        | 545.01            | 4.50                    | 569.9                             | 99            | ✓     |
| 16    | C16   | 1-naphthyl                                       | Ts             | <b>B05C16</b> | nd    | 53                        | 517.11            | 4.59                    | 540.0                             | 73            | no    |
| 17    | C17   | 2-furyl                                          | Ts             | <b>B05C17</b> | nd    | nd                        | 457.08            | nd                      | nd                                | nd            | no    |
| 18    | C18   | Ph                                               | Ns             | <b>B05C18</b> | 68:32 | 59                        | 498.07            | nd                      | nd                                | nd            | no    |
| 19    | C19   | Ph                                               | Ms             | <b>B05C19</b> | 98:2  | 68                        | 391.06            | 3.78                    | 414.0                             | 97            | ✓     |
| 20    | C20   | 3,4-di-MeOC <sub>6</sub> H <sub>4</sub>          | Ts             | <b>B05C20</b> | 97:3  | 58                        | 527.12            | 4.00                    | 550.0                             | 99            | ✓     |
| 21    | C21   | 2-thiophene                                      | Ts             | <b>B05C21</b> | 99:1  | 59                        | 473.05            | 4.22                    | 496.0                             | 95            | ✓     |
| 22    | C22   | 5-methyl-2-furyl                                 | Ts             | <b>B05C22</b> | nd    | nd                        | 471.09            | nd                      | nd                                | nd            | no    |
| 23    | C23   | 4-FC <sub>6</sub> H <sub>4</sub>                 | Ts             | <b>B05C23</b> | 97:3  | 78                        | 485.09            | 4.32                    | 508.0                             | 95            | ✓     |
| 24    | C24   | 4- <i>i</i> -PrC <sub>6</sub> H <sub>4</sub>     | Ts             | <b>B05C24</b> | 98:2  | 65                        | 509.14            | 4.76                    | 532.1                             | 98            | ✓     |
| 25    | C25   | 3,4,5-tri-MeOC <sub>6</sub> H <sub>4</sub>       | Ts             | <b>B05C25</b> | nd    | 43                        | 557.13            | 4.07                    | 580.0                             | 52            | no    |
| 26    | C26   | 3-FC <sub>6</sub> H <sub>4</sub>                 | Ts             | <b>B05C26</b> | 99:1  | 81                        | 485.09            | 4.31                    | 508.0                             | 97            | ✓     |
| 27    | C27   | 4-ClC <sub>6</sub> H <sub>4</sub>                | 4ClBs          | <b>B05C27</b> | 93:7  | 68                        | 521.00            | 4.55                    | 544.0                             | 99            | ✓     |
| 28    | C28   | 4-ClC <sub>6</sub> H <sub>4</sub>                | Ms             | <b>B05C28</b> | 99:1  | 63                        | 425.03            | 3.96                    | 448.0                             | 94            | ✓     |
| 29    | C29   | 4-ClC <sub>6</sub> H <sub>4</sub>                | Bs             | <b>B05C29</b> | 88:12 | 60                        | 487.04            | 4.45                    | 510.0                             | 85            | no    |
| 30    | C30   | 4-MeC <sub>6</sub> H <sub>4</sub>                | 4ClBs          | <b>B05C30</b> | 95:5  | 86                        | 501.06            | 4.56                    | 524.0                             | 97            | ✓     |
| 31    | C31   | 4-ClC <sub>6</sub> H <sub>4</sub>                | 2MCBs          | <b>B05C31</b> | 99:1  | 98                        | 545.05            | 4.38                    | 568.0                             | 41            | no    |
| 32    | C32   | 1-Me-2-pyrrole                                   | Ts             | <b>B05C32</b> | nd    | nd                        | 470.11            | nd                      | nd                                | nd            | no    |
| 33    | C33   | 3-MeC <sub>6</sub> H <sub>4</sub>                | Ts             | <b>B05C33</b> | 98:2  | 82                        | 481.11            | 4.47                    | 504.0                             | 95            | ✓     |
| 34    | C34   | 4-MeOC <sub>6</sub> H <sub>4</sub>               | 2MCBs          | <b>B05C34</b> | 93:7  | 62                        | 541.10            | 4.14                    | 564.0                             | 88            | no    |
| 35    | C35   | 4-MeOC <sub>6</sub> H <sub>4</sub>               | Bs             | <b>B05C35</b> | 96:4  | 65                        | 483.09            | 4.11                    | 506.0                             | 98            | ✓     |
| 36    | C36   | 4-MeC <sub>6</sub> H <sub>4</sub>                | 2Ns            | <b>B05C36</b> | nd    | 57                        | 512.08            | nd                      | nd                                | nd            | no    |
| 37    | C37   | 4-MeOC <sub>6</sub> H <sub>4</sub>               | 4ClBs          | <b>B05C37</b> | 93:7  | 80                        | 517.05            | 4.32                    | 540.0                             | 97            | ✓     |
| 38    | C38   | 4-MeOC <sub>6</sub> H <sub>4</sub>               | 2Ts            | <b>B05C38</b> | 94:6  | 63                        | 497.11            | 4.25                    | 520.0                             | 99            | ✓     |
| 39    | C39   | 3-MeOC <sub>6</sub> H <sub>4</sub>               | Ts             | <b>B05C39</b> | 99:1  | 75                        | 497.11            | 4.26                    | 520.0                             | 94            | ✓     |
| 40    | C40   | 4-ClC <sub>6</sub> H <sub>4</sub>                | 2Ts            | <b>B05C40</b> | 95:5  | 92                        | 501.06            | 4.51                    | 524.0                             | 99            | ✓     |
| 41    | C41   | 4-MeC <sub>6</sub> H <sub>4</sub>                | 2Ts            | <b>B05C41</b> | 97:3  | 86                        | 481.11            | 4.51                    | 504.0                             | 95            | ✓     |
| 42    | C42   | 4-MeC <sub>6</sub> H <sub>4</sub>                | 2MCBs          | <b>B05C42</b> | 97:3  | 99                        | 525.10            | 4.31                    | 548.0                             | 96            | ✓     |
| 43    | C43   | 4-MeC <sub>6</sub> H <sub>4</sub>                | Bs             | <b>B05C43</b> | 98:2  | 103                       | 467.10            | 4.37                    | 490.0                             | 99            | ✓     |
| 44    | C44   | 4-MeC <sub>6</sub> H <sub>4</sub>                | 4Ns            | <b>B05C44</b> | 81:19 | 105                       | 512.08            | nd                      | nd                                | 33            | no    |
| 45    | C45   | 4-MeC <sub>6</sub> H <sub>4</sub>                | 3Ns            | <b>B05C45</b> | 80:20 | 91                        | 512.08            | nd                      | nd                                | nd            | no    |
| 46    | C46   | 4-MeC <sub>6</sub> H <sub>4</sub>                | Ms             | <b>B05C46</b> | 98:2  | 79                        | 405.08            | 3.94                    | 428.0                             | 96            | ✓     |

<sup>a</sup> Crude yield after cleavage.

<sup>b</sup> Short 6-min method; purity observed at  $\lambda$  210 nm.

<sup>c</sup> [M + H]<sup>+</sup>.

## Building Block Screening for the Thiol 1,4-Addition to the Dihydropyrrole Scaffolds

**Screening  $\gamma$ -Substituted Allenic Acids Using *N*-Tosyltolualdimine and Benzenethiol/*p*-Toluenethiol.** The lantern-bound dihydropyrroles **L-A(02–11)02** derived from allenic acids **A(02–11)** were reacted with thiol **E01** or **E02** according to the general procedure. The data from analyses ( $^1\text{H}$  NMR and LCMS spectra; see Supporting Information, Part C, for copies of spectra and chromatograms) of the cleaved Michael addition products **A(02–11)C02E01/02** are summarized in Table 9. Based on this screening result, seven allenic acids (of 10) were chosen for inclusion in the library synthesis of pyrrolidines.

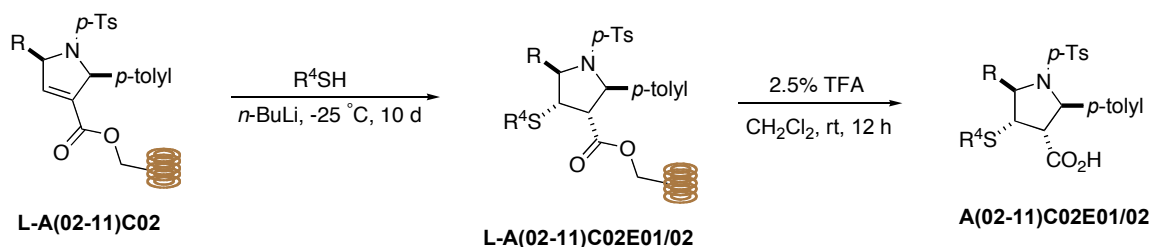

**Table 9.** Screening Allenic Acids **A(02–11)** for the Thiol Addition to the Dihydropyrrole Scaffolds.

| entry | product          |                 |                  | NMR       |                        |             | LCMS <sup>b</sup> |                                |                      |            | incl.          |
|-------|------------------|-----------------|------------------|-----------|------------------------|-------------|-------------------|--------------------------------|----------------------|------------|----------------|
|       | R                | R <sup>4</sup>  | no.              | conv. (%) | yield (%) <sup>a</sup> | dr          | calcd. [M]        | observed [M + Na] <sup>+</sup> | retention time (min) | purity (%) |                |
| 1     | Me               | Ph              | <b>A02C02E01</b> | >90       | 92                     | 1:0.21:0.14 | 481.14            | nd                             | nd                   | nd         | no             |
| 2     | <i>t</i> -Bu     | Ph              | <b>A03C02E01</b> | 0         | sm                     | nd          | 523.19            | nd                             | nd                   | nd         | no             |
| 3     | Ph               | Ph              | <b>A04C02E01</b> | >80       | 59                     | 1 : 0.20    | 543.15            | nd                             | nd                   | nd         | no             |
| 4     | Et               | <i>p</i> -tolyl | <b>A05C02E02</b> | 99        | 91                     | 1 : 0.10    | 509.17            | 532.1                          | 4.617                | 81         | √              |
| 5     | <i>i</i> -Pr     | <i>p</i> -tolyl | <b>A06C02E02</b> | 98        | 88                     | 1 : 0.03    | 523.19            | 546.1                          | 4.661                | 56         | √ <sup>c</sup> |
| 6     | <i>n</i> -Pr     | <i>p</i> -tolyl | <b>A07C02E02</b> | >98       | 87                     | 1 : 0.11    | 523.19            | 546.1                          | 4.678                | 66         | √ <sup>c</sup> |
| 7     | <i>n</i> -Bu     | <i>p</i> -tolyl | <b>A08C02E02</b> | 97        | 79                     | 1 : 0.07    | 537.20            | 560.1                          | 4.849                | 86         | √              |
| 8     | <i>n</i> -pentyl | <i>p</i> -tolyl | <b>A09C02E02</b> | 93        | 61                     | 1 : 0.11    | 551.22            | 574.0                          | 4.994                | 73         | √              |
| 9     | <i>n</i> -hexyl  | <i>p</i> -tolyl | <b>A10C02E02</b> | 96        | 64                     | 1 : 0.10    | 565.23            | 588.1                          | 5.140                | 78         | √              |
| 10    | cyp-Me           | <i>p</i> -tolyl | <b>A11C02E02</b> | 96        | 86                     | 1 : 0.08    | 563.22            | 586.1                          | 4.999                | 76         | √              |

<sup>a</sup> Crude yield after cleavage.

<sup>b</sup> Short 6-min method; purity observed at  $\lambda$  210 nm.

<sup>c</sup> Selection based on  $^1\text{H}$  NMR spectrum.

**Screening Imines Using Resin-Bound Allenate L-A05 and *p*-Toluenethiol E02.** The lantern-bound dihydropyrroles **L-A05C(01–46)** were reacted with thiol **E02** according to the procedure on page S23. The analytical data ( $^1\text{H}$  NMR and LCMS spectra; see Supporting Information, Part C, for copies of spectra and chromatograms) of the cleaved 1,4-addition products **A05C(01–46)E02** are summarized in Table 10. Based on these results, 25 imines (of 46) were chosen for inclusion in the library synthesis.

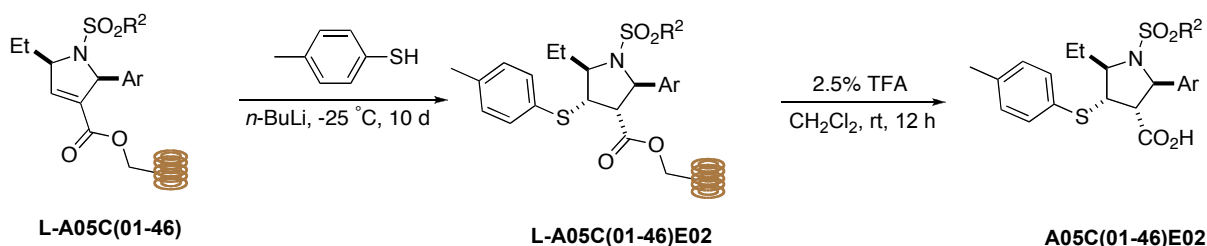

**Table 10.** Imine Screening for the 5-Ethylidihydropyrrole Scaffold With *p*-Toluenethiol.

| entry | Product |                 |                  | NMR       |                        |       | LCMS <sup>b</sup> |                            |                |            | incl.          |
|-------|---------|-----------------|------------------|-----------|------------------------|-------|-------------------|----------------------------|----------------|------------|----------------|
|       | Ar      | R <sup>2</sup>  | no.              | conv. (%) | yield (%) <sup>a</sup> | dr    | calcd. [M]        | obs. [M + Na] <sup>+</sup> | ret time (min) | purity (%) |                |
| 1     | Ph      | <i>p</i> -tolyl | <b>A05C01E02</b> | 99        | 85                     | 100:0 | 495.15            | 518.1                      | 4.511          | 48         | √ <sup>c</sup> |

|    |                                                  |                                |                  |     |      |       |        |                    |       |    |                |
|----|--------------------------------------------------|--------------------------------|------------------|-----|------|-------|--------|--------------------|-------|----|----------------|
| 2  | 4-MeC <sub>6</sub> H <sub>4</sub>                | <i>p</i> -tolyl                | <b>A05C02E02</b> | 96  | 94   | 95:5  | 509.17 | 532.1              | 4.617 | 81 | √              |
| 3  | 4-EtC <sub>6</sub> H <sub>4</sub>                | <i>p</i> -tolyl                | <b>A05C03E02</b> | 98  | 75   | 99:1  | 523.19 | 546.1              | 4.730 | 69 | √ <sup>c</sup> |
| 4  | 4-MeOC <sub>6</sub> H <sub>4</sub>               | <i>p</i> -tolyl                | <b>A05C04E02</b> | 99  | 60   | 100:0 | 525.16 | 548.1              | 4.447 | 60 | √ <sup>c</sup> |
| 5  | 4-EtOC <sub>6</sub> H <sub>4</sub>               | <i>p</i> -tolyl                | <b>A05C05E02</b> | 99  | 65   | 100:0 | 539.18 | 539.3 <sup>d</sup> | 4.429 | 76 | √              |
| 6  | piperonal                                        | <i>p</i> -tolyl                | <b>A05C06E02</b> | 93  | 80   | 90:10 | 539.14 | 562.1              | 4.451 | 60 | √ <sup>c</sup> |
| 7  | 4-Me <sub>2</sub> NC <sub>6</sub> H <sub>4</sub> | <i>p</i> -tolyl                | <b>A05C07E02</b> | nd  | mess | nd    | 538.20 | nd                 | nd    | nd | no             |
| 8  | 4-Et <sub>2</sub> NC <sub>6</sub> H <sub>4</sub> | <i>p</i> -tolyl                | <b>A05C08E02</b> | nd  | mess | nd    | 566.23 | nd                 | nd    | nd | no             |
| 9  | 4-NCC <sub>6</sub> H <sub>4</sub>                | <i>p</i> -tolyl                | <b>A05C09E02</b> | 91  | 67   | 91:9  | 520.15 | 543.1              | 4.448 | 57 | √ <sup>c</sup> |
| 10 | 2-FC <sub>6</sub> H <sub>4</sub>                 | <i>p</i> -tolyl                | <b>A05C10E02</b> | 95  | 87   | 100:0 | 513.14 | 536.0              | 4.451 | 69 | √ <sup>c</sup> |
| 11 | 4-ClC <sub>6</sub> H <sub>4</sub>                | <i>p</i> -tolyl                | <b>A05C11E02</b> | 95  | 86   | 91:9  | 529.11 | 552.0              | 4.654 | 92 | √              |
| 12 | 3-ClC <sub>6</sub> H <sub>4</sub>                | <i>p</i> -tolyl                | <b>A05C12E02</b> | 95  | 74   | 91:9  | 529.11 | 552.0              | 4.655 | 44 | √ <sup>c</sup> |
| 13 | 3,4-ClC <sub>6</sub> H <sub>4</sub>              | <i>p</i> -tolyl                | <b>A05C13E02</b> | 90  | 79   | 91:9  | 563.08 | 586.0              | 4.785 | 87 | √              |
| 14 | 4-BrC <sub>6</sub> H <sub>4</sub>                | <i>p</i> -tolyl                | <b>A05C14E02</b> | 94  | 97   | 91:9  | 573.06 | 598.0              | 4.685 | 90 | √              |
| 15 | 3-BrC <sub>6</sub> H <sub>4</sub>                | <i>p</i> -tolyl                | <b>A05C15E02</b> | nd  | mess | nd    | 573.06 | nd                 | nd    | nd | no             |
| 16 | 1-naphthyl                                       | <i>p</i> -tolyl                | <b>A05C16E02</b> | 97  | 101  | 100:0 | 545.17 | 568.1              | 4.691 | 78 | √              |
| 17 | 2-furyl                                          | <i>p</i> -tolyl                | <b>A05C17E02</b> | nd  | nd   | nd    | 485.13 | nd                 | nd    | nd | no             |
| 18 | Ph                                               | <i>p</i> -NO <sub>2</sub> Ph   | <b>A05C18E02</b> | nd  | mess | N/A   | 526.12 | nd                 | nd    | nd | no             |
| 19 | Ph                                               | Me                             | <b>A05C19E02</b> | nd  | mess | 100:1 | 419.12 | 442.0              | 4.059 | 67 | no             |
| 20 | 3,4-MeOC <sub>6</sub> H <sub>4</sub>             | <i>p</i> -tolyl                | <b>A05C20E02</b> | 95  | 66   | 92:8  | 555.17 | 578.1              | 4.335 | 90 | √              |
| 21 | 2-thiophenyl                                     | <i>p</i> -tolyl                | <b>A05C21E02</b> | 90  | 71   | 89:11 | 501.11 | 524.0              | 4.436 | 69 | √ <sup>c</sup> |
| 22 | 4-Me-2-furyl                                     | <i>p</i> -tolyl                | <b>A05C22E02</b> | nd  | nd   | nd    | 499.15 | nd                 | nd    | nd | no             |
| 23 | 4-FC <sub>6</sub> H <sub>4</sub>                 | <i>p</i> -tolyl                | <b>A05C23E02</b> | 98  | 83   | 92:8  | 513.14 | 514.2 <sup>e</sup> | 4.500 | 70 | √              |
| 24 | 4- <i>i</i> -PrC <sub>6</sub> H <sub>4</sub>     | <i>p</i> -tolyl                | <b>A05C24E02</b> | 93  | 88   | 93:7  | 537.20 | 537.4 <sup>d</sup> | 4.827 | 70 | √              |
| 25 | 3,4,5-MeOC <sub>6</sub> H <sub>4</sub>           | <i>p</i> -tolyl                | <b>A05C25E02</b> | nd  | mess | nd    | 585.19 | 608.1              | 4.301 | 42 | no             |
| 26 | 3-FC <sub>6</sub> H <sub>4</sub>                 | <i>p</i> -tolyl                | <b>A05C26E02</b> | 99  | 75   | 93:7  | 513.14 | 537.3              | 4.549 | 52 | √ <sup>c</sup> |
| 27 | 4-ClC <sub>6</sub> H <sub>4</sub>                | <i>p</i> -ClPh                 | <b>A05C27E02</b> | 91  | 79   | 90:10 | 549.06 | 572.0              | 4.740 | 43 | √ <sup>c</sup> |
| 28 | 4-ClC <sub>6</sub> H <sub>4</sub>                | Me                             | <b>A05C28E02</b> | N/A | mess | N/A   | 453.08 | nd                 | nd    | nd | no             |
| 29 | 4-ClC <sub>6</sub> H <sub>4</sub>                | Ph                             | <b>A05C29E02</b> | 94  | 90   | 100:0 | 515.10 | 539.0              | 4.560 | 68 | √ <sup>c</sup> |
| 30 | 4-MeC <sub>6</sub> H <sub>4</sub>                | <i>p</i> -ClPh                 | <b>A05C30E02</b> | 98  | 86   | 100:0 | 529.11 | 553.3              | 4.710 | 54 | √ <sup>c</sup> |
| 31 | 4-ClC <sub>6</sub> H <sub>4</sub>                | <i>o</i> -CO <sub>2</sub> MePh | <b>A05C31E02</b> | N/A | N/A  | N/A   | 573.10 | nd                 | nd    | nd | no             |
| 32 | 1-methyl-pyrrolyl                                | <i>p</i> -tolyl                | <b>A05C32E02</b> | nd  | nd   | nd    | 498.16 | nd                 | nd    | nd | no             |
| 33 | 3-MeC <sub>6</sub> H <sub>4</sub>                | <i>p</i> -tolyl                | <b>A05C33E02</b> | 99  | 92   | 91:9  | 509.17 | 51e <sup>d</sup>   | 4.573 | 58 | √ <sup>c</sup> |
| 34 | 4-MeOC <sub>6</sub> H <sub>4</sub>               | <i>o</i> -CO <sub>2</sub> MePh | <b>A05C34E02</b> | N/A | N/A  | N/A   | 569.15 | nd                 | nd    | nd | no             |
| 35 | 4-MeOC <sub>6</sub> H <sub>4</sub>               | Ph                             | <b>A05C35E02</b> | 99  | 66   | 93:7  | 511.15 | 534.1              | 4.314 | 72 | √              |
| 36 | 4-MeC <sub>6</sub> H <sub>4</sub>                | <i>o</i> -NO <sub>2</sub> Ph   | <b>A05C36E02</b> | nd  | mess | nd    | 540.14 | nd                 | nd    | nd | no             |
| 37 | 4-MeOC <sub>6</sub> H <sub>4</sub>               | <i>p</i> -ClPh                 | <b>A05C37E02</b> | nd  | mess | nd    | 545.11 | nd                 | nd    | nd | no             |
| 38 | 4-MeOC <sub>6</sub> H <sub>4</sub>               | <i>o</i> -tolyl                | <b>A05C38E02</b> | nd  | mess | nd    | 525.16 | nd                 | nd    | nd | no             |
| 39 | 3-MeOC <sub>6</sub> H <sub>4</sub>               | <i>p</i> -tolyl                | <b>A05C39E02</b> | nd  | mess | nd    | 525.16 | nd                 | nd    | nd | no             |
| 40 | 4-ClC <sub>6</sub> H <sub>4</sub>                | <i>o</i> -tolyl                | <b>A05C40E02</b> | 98  | 106  | 93:7  | 529.11 | 530.0 <sup>e</sup> | 4.672 | 52 | √ <sup>c</sup> |
| 41 | 4-MeC <sub>6</sub> H <sub>4</sub>                | <i>o</i> -tolyl                | <b>A05C41E02</b> | 95  | 78   | 92:8  | 509.17 | 532.4              | 4.619 | 61 | √ <sup>c</sup> |
| 42 | 4-MeC <sub>6</sub> H <sub>4</sub>                | <i>o</i> -CO <sub>2</sub> MePh | <b>A05C42E02</b> | nd  | mess | N/A   | 553.16 | nd                 | nd    | nd | no             |
| 43 | 4-MeC <sub>6</sub> H <sub>4</sub>                | Ph                             | <b>A05C43E02</b> | 96  | 86   | 90:1  | 495.15 | 518.2              | 4.510 | 38 | no             |
| 44 | 4-MeC <sub>6</sub> H <sub>4</sub>                | <i>p</i> -NO <sub>2</sub> Ph   | <b>A05C44E02</b> | nd  | mess | N/A   | 540.14 | nd                 | nd    | nd | no             |
| 45 | 4-MeC <sub>6</sub> H <sub>4</sub>                | <i>m</i> -NO <sub>2</sub> Ph   | <b>A05C45E02</b> | nd  | mess | N/A   | 540.14 | nd                 | nd    | nd | no             |
| 46 | 4-MeC <sub>6</sub> H <sub>4</sub>                | Me                             | <b>A05C46E02</b> | 85  | 77   | 93:7  | 433.14 | 456.0              | 4.192 | 55 | no             |

<sup>a</sup> Crude yield after cleavage.

<sup>b</sup> Short 6-min method; purity observed at  $\lambda$  210 nm.

<sup>c</sup> Selection based on  $^1\text{H}$  NMR spectrum.

<sup>d</sup>  $[\text{M}]^+$

<sup>e</sup>  $[\text{M} + \text{H}]^+$

**Screening Thiols Using Resin-Bound Dihydropyrrole L-A05C02.** The thiols were reacted with dihydropyrrole **L-A05C02** according to the procedure on page S23. The data from the spectroscopic analyses ( $^1\text{H}$  NMR and LCMS spectra; see Supporting Information, Part C, for copies of spectra and chromatograms) of the cleaved pentasubstituted pyrrolidines **A05C02E(01–32)** are summarized in Table 11. Based on these results, 19 thiols (of 32) were chosen for inclusion in the library synthesis.

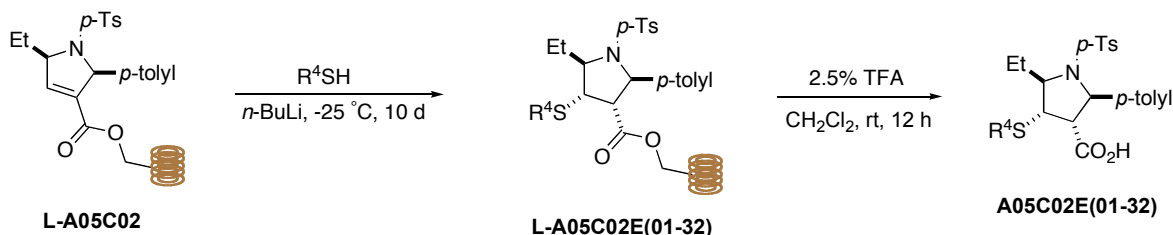

**Table 11.** Screening Thiols **E(01–32)** Using **L-A05C02**.

| entry | product                                                           |                  |           | NMR                    |       |            | LCMS <sup>b</sup>          |                |            |                |
|-------|-------------------------------------------------------------------|------------------|-----------|------------------------|-------|------------|----------------------------|----------------|------------|----------------|
|       | R <sup>4</sup>                                                    | no.              | conv. (%) | yield (%) <sup>a</sup> | dr    | calcd. [M] | obs. [M + Na] <sup>+</sup> | ret time (min) | purity (%) | incl.          |
| 1     | Ph                                                                | <b>A05C02E01</b> | 99        | 95                     | 93:7  | 495.15     | 518.1                      | 4.429          | 56         | √ <sup>c</sup> |
| 2     | <i>p</i> -tolyl                                                   | <b>A05C02E02</b> | 96        | 94                     | 95:5  | 509.17     | 532.1                      | 4.617          | 81         | √              |
| 3     | 3,4-(CH <sub>3</sub> ) <sub>2</sub> C <sub>6</sub> H <sub>3</sub> | <b>A05C02E03</b> | >99       | 97                     | 90:10 | 523.19     | N/A                        | N/A            | N/A        | no             |
| 4     | 4-MeOC <sub>6</sub> H <sub>4</sub>                                | <b>A05C02E04</b> | >99       | 115                    | 100:0 | 525.16     | 526.2 <sup>d</sup>         | 4.416          | 72         | √              |
| 5     | 4-ClC <sub>6</sub> H <sub>4</sub>                                 | <b>A05C02E05</b> | 88        | 91                     | 83:17 | 529.11     | N/A                        | N/A            | N/A        | no             |
| 6     | Bn                                                                | <b>A05C02E06</b> | >99       | 80                     | 91:9  | 509.17     | 532.1                      | 4.507          | 50         | √ <sup>c</sup> |
| 7     | 4- <i>t</i> -butylbenzyl                                          | <b>A05C02E07</b> | >99       | 87                     | 92:8  | 565.23     | 588.1                      | 4.960          | 32         | √ <sup>c</sup> |
| 8     | 4-fluorobenzyl                                                    | <b>A05C02E08</b> | >99       | 109                    | 70:30 | 527.16     | N/A                        | N/A            | N/A        | no             |
| 9     | 4-chlorobenzyl                                                    | <b>A05C02E09</b> | >99       | 97                     | 87:13 | 543.13     | N/A                        | N/A            | N/A        | no             |
| 10    | 2-chlorobenzyl                                                    | <b>A05C02E10</b> | >99       | 102                    | 81:19 | 543.13     | N/A                        | N/A            | N/A        | no             |
| 11    | 4-bromobenzyl                                                     | <b>A05C02E11</b> | 94        | 80                     | 72:28 | 587.08     | N/A                        | N/A            | N/A        | no             |
| 12    | 4-methoxybenzyl                                                   | <b>A05C02E12</b> | 87        | 61                     | 77:23 | 539.18     | N/A                        | N/A            | N/A        | no             |
| 13    | 2-naphtyl                                                         | <b>A05C02E13</b> | 44        | 81                     | 82:18 | 545.17     | N/A                        | N/A            | N/A        | no             |
| 14    | 2-furanyl                                                         | <b>A05C02E14</b> | >99       | 55                     | 77:23 | 499.15     | N/A                        | N/A            | N/A        | no             |
| 15    | phenethyl                                                         | <b>A05C02E15</b> | 95        | 94                     | 85:15 | 523.19     | N/A                        | N/A            | N/A        | no             |
| 16    | Et                                                                | <b>A05C02E16</b> | >99       | 79                     | 97:3  | 447.15     | 448.1 <sup>d</sup>         | 4.233          | 72         | √              |
| 17    | <i>i</i> -propyl                                                  | <b>A05C02E17</b> | >99       | 82                     | 100:0 | 461.17     | 484.1                      | 4.559          | 92         | √              |
| 18    | <i>n</i> -propyl                                                  | <b>A05C02E18</b> | >99       | 87                     | 100:0 | 461.17     | 484.1                      | 4.420          | 86         | √              |
| 19    | <i>t</i> -butyl                                                   | <b>A05C02E19</b> | >99       | 95                     | 100:0 | 475.19     | 498.1                      | 4.496          | 90         | √              |
| 20    | <i>sec</i> -butyl                                                 | <b>A05C02E20</b> | >99       | 98                     | 100:0 | 475.19     | 498.1                      | 4.524          | 92         | √              |
| 21    | isobutyl                                                          | <b>A05C02E21</b> | >99       | 102                    | 100:0 | 475.19     | 498.1                      | 4.541          | 90         | √              |
| 22    | <i>n</i> -butyl                                                   | <b>A05C02E22</b> | >99       | 135                    | 100:0 | 475.19     | 498.1                      | 4.558          | 83         | √              |
| 23    | isoamyl                                                           | <b>A05C02E23</b> | >99       | 90                     | 100:0 | 489.20     | 512.1                      | 4.669          | 75         | √              |
| 24    | <i>n</i> -pentyl                                                  | <b>A05C02E24</b> | >99       | 88                     | 91:9  | 489.20     | 512.1                      | 4.693          | 68         | √ <sup>c</sup> |
| 25    | <i>n</i> -hexyl                                                   | <b>A05C02E25</b> | >99       | 116                    | 88:12 | 503.22     | 526.1                      | 4.841          | 69         | √ <sup>c</sup> |
| 26    | <i>n</i> -heptyl                                                  | <b>A05C02E26</b> | 58        | 104                    | 85:15 | 517.23     | N/A                        | N/A            | N/A        | no             |
| 27    | <i>n</i> -decyl                                                   | <b>A05C02E27</b> | <10       | 73                     | mess  | 559.28     | N/A                        | N/A            | N/A        | no             |
| 28    | cyclopentyl                                                       | <b>A05C02E28</b> | >99       | 100                    | 100:0 | 487.19     | 510.1                      | 4.567          | 74         | √              |
| 29    | cyclohexyl                                                        | <b>A05C02E29</b> | >99       | 98                     | 100:0 | 501.20     | 524.0                      | 4.673          | 66         | √ <sup>c</sup> |

|    |                                                             |                  |     |     |       |        |       |       |     |                |
|----|-------------------------------------------------------------|------------------|-----|-----|-------|--------|-------|-------|-----|----------------|
| 30 | CH <sub>2</sub> =CHCH <sub>2</sub>                          | <b>A05C02E30</b> | >99 | 74  | 91:9  | 459.15 | 482.1 | 4.340 | 56  | √ <sup>c</sup> |
| 31 | MeO <sub>2</sub> CCH <sub>2</sub> CH <sub>2</sub>           | <b>A05C02E31</b> | >99 | 100 | 86:14 | 505.16 | N/A   | N/A   | N/A | no             |
| 32 | <i>t</i> -BuO <sub>2</sub> CCH <sub>2</sub> CH <sub>2</sub> | <b>A05C02E32</b> | >99 | 94  | 91:9  | 547.21 | 570.1 | 4.575 | 41  | √ <sup>c</sup> |

<sup>a</sup> Crude yield after cleavage.

<sup>b</sup> Short 6-min method; purity observed at λ 210 nm.

<sup>c</sup> Selection based on <sup>1</sup>H NMR spectrum.

<sup>d</sup> [M + H]<sup>+</sup>

## Building Block Screening for the Thiol 1,4-Addition to the Tetrahydropyridine Scaffolds

**Screening Imines by Reacting Resin-Bound Tetrahydropyridines L-B01C(01–46) With Benzyl Thiol (E06).** A series of 46 resin-bound tetrahydropyridines **L-B01C(01–46)** were reacted with thiol **E06** according to the general procedure. The analytical data (<sup>1</sup>H NMR and LCMS spectra; see Supporting Information, Part D, for copies of spectra and chromatograms) of the cleaved Michael addition products **B01C(01–46)E06** are summarized in Table 12. Based on these results, 21 imines (of 46) were chosen for inclusion in the library synthesis.

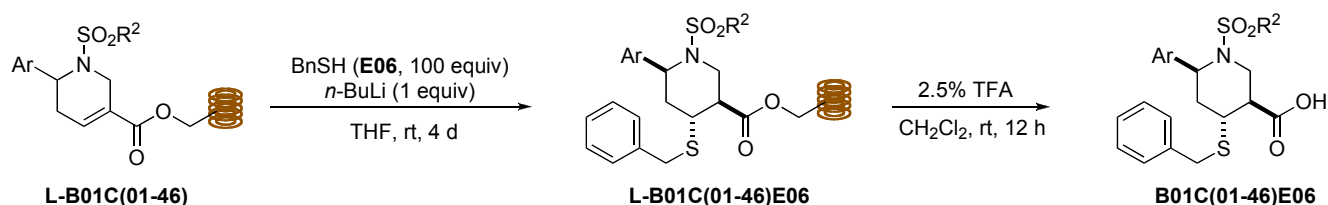

**Table 12.** Screening Imines for the Benzylthiol Addition Using Resin-Bound Tetrahydropyridine **B01C(01–46)**.

| entry | imine | product <sup>a</sup>                             |                |                  | LCMS <sup>c</sup>         |               |                         |                                   |               |                |
|-------|-------|--------------------------------------------------|----------------|------------------|---------------------------|---------------|-------------------------|-----------------------------------|---------------|----------------|
|       |       | Ar                                               | R <sup>2</sup> | no.              | yield <sup>b</sup><br>(%) | calcd.<br>[M] | retention<br>time (min) | observed<br>[M + Na] <sup>+</sup> | purity<br>(%) | incl.          |
| 1     | C01   | Ph                                               | Ts             | <b>B01C01E06</b> | 80                        | 481.14        | 4.43                    | 504.0                             | 84            | √              |
| 2     | C02   | 4-MeC <sub>6</sub> H <sub>4</sub>                | Ts             | <b>B01C02E06</b> | 66                        | 495.15        | 4.52                    | 518.1                             | 88            | √              |
| 3     | C03   | 4-EtC <sub>6</sub> H <sub>4</sub>                | Ts             | <b>B01C03E06</b> | 82                        | 509.17        | 4.65                    | 532.1                             | 89            | √              |
| 4     | C04   | 4-MeOC <sub>6</sub> H <sub>4</sub>               | Ts             | <b>B01C04E06</b> | 84                        | 511.15        | 4.35                    | 534.1                             | 99            | √              |
| 5     | C05   | 4-EtOC <sub>6</sub> H <sub>4</sub>               | Ts             | <b>B01C05E06</b> | 77                        | 525.16        | 4.51                    | 548.0                             | 86            | √              |
| 6     | C06   | piperonyl                                        | Ts             | <b>B01C06E06</b> | 76                        | 525.13        | 4.33                    | 526.1 <sup>d</sup>                | 85            | √              |
| 7     | C07   | 4-Me <sub>2</sub> NC <sub>6</sub> H <sub>4</sub> | Ts             | <b>B01C07E06</b> | 56                        | 524.18        | 4.21                    | 525.1 <sup>d</sup>                | 33            | no             |
| 8     | C08   | 4-Et <sub>2</sub> NC <sub>6</sub> H <sub>4</sub> | Ts             | <b>B01C08E06</b> | 51                        | 552.21        | nd                      | nd                                | nd            | no             |
| 9     | C09   | 4-NCC <sub>6</sub> H <sub>4</sub>                | Ts             | <b>B01C09E06</b> | 47                        | 506.13        | nd                      | nd                                | nd            | no             |
| 10    | C10   | 2-FC <sub>6</sub> H <sub>4</sub>                 | Ts             | <b>B01C10E06</b> | 60                        | 499.13        | 4.43                    | 522.0                             | 73            | √              |
| 11    | C11   | 4-ClC <sub>6</sub> H <sub>4</sub>                | Ts             | <b>B01C11E06</b> | 84                        | 515.10        | 4.60                    | 538.0                             | 88            | √              |
| 12    | C12   | 3-ClC <sub>6</sub> H <sub>4</sub>                | Ts             | <b>B01C12E06</b> | 80                        | 515.10        | 4.51                    | 538.0                             | 93            | √              |
| 13    | C13   | 3,4-di-ClC <sub>6</sub> H <sub>4</sub>           | Ts             | <b>B01C13E06</b> | 51                        | 549.06        | 4.71                    | 572.0                             | 54            | no             |
| 14    | C14   | 4-BrC <sub>6</sub> H <sub>4</sub>                | Ts             | <b>B01C14E06</b> | 74                        | 559.05        | 4.63                    | 582.0                             | 59            | no             |
| 15    | C15   | 3-BrC <sub>6</sub> H <sub>4</sub>                | Ts             | <b>B01C15E06</b> | 83                        | 559.05        | 4.59                    | 582.0                             | 70            | √              |
| 16    | C16   | 1-naphthyl                                       | Ts             | <b>B01C16E06</b> | 80                        | 531.15        | nd                      | nd                                | nd            | no             |
| 17    | C17   | 2-furyl                                          | Ts             | <b>B01C17E06</b> | nd                        | 471.12        | nd                      | nd                                | nd            | no             |
| 18    | C18   | Ph                                               | Ns             | <b>B01C18E06</b> | nd                        | 512.11        | nd                      | nd                                | nd            | no             |
| 19    | C19   | Ph                                               | Ms             | <b>B01C19E06</b> | 104                       | 405.11        | 3.89                    | 428.0                             | 40            | no             |
| 20    | C20   | 3,4-di-MeOC <sub>6</sub> H <sub>4</sub>          | Ts             | <b>B01C20E06</b> | 62                        | 541.16        | 4.19                    | 564.0                             | 51            | √ <sup>e</sup> |
| 21    | C21   | 2-thiophene                                      | Ts             | <b>B01C21E06</b> | 60                        | 487.09        | 4.37                    | 510.0                             | 45            | no             |
| 22    | C22   | 5-methyl-2-furyl                                 | Ts             | <b>B01C22E06</b> | 78                        | 485.13        | nd                      | nd                                | nd            | no             |
| 23    | C23   | 4-FC <sub>6</sub> H <sub>4</sub>                 | Ts             | <b>B01C23E06</b> | 76                        | 499.13        | 4.44                    | 522.0                             | 59            | no             |
| 24    | C24   | 4- <i>i</i> -PrC <sub>6</sub> H <sub>4</sub>     | Ts             | <b>B01C24E06</b> | 70                        | 523.19        | 4.78                    | 546.1                             | 59            | no             |
| 25    | C25   | 3,4,5-tri-MeOC <sub>6</sub> H <sub>4</sub>       | Ts             | <b>B01C25E06</b> | 45                        | 571.17        | 4.17                    | 594.1                             | 73            | √              |
| 26    | C26   | 3-FC <sub>6</sub> H <sub>4</sub>                 | Ts             | <b>B01C26E06</b> | 77                        | 499.13        | 4.42                    | 522.0                             | 51            | no             |
| 27    | C27   | 4-ClC <sub>6</sub> H <sub>4</sub>                | 4ClBs          | <b>B01C27E06</b> | 70                        | 535.04        | nd                      | nd                                | nd            | no             |
| 28    | C28   | 4-ClC <sub>6</sub> H <sub>4</sub>                | Ms             | <b>B01C28E06</b> | 76                        | 439.07        | nd                      | nd                                | nd            | no             |



|    |     |                                    |       |                  |    |        |      |                    |    |                |
|----|-----|------------------------------------|-------|------------------|----|--------|------|--------------------|----|----------------|
| 29 | C29 | 4-ClC <sub>6</sub> H <sub>4</sub>  | Bs    | <b>B01C29E06</b> | nd | 501.08 | 4.48 | 524.0              | 46 | no             |
| 30 | C30 | 4-MeC <sub>6</sub> H <sub>4</sub>  | 4ClBs | <b>B01C30E06</b> | 72 | 515.10 | 4.63 | 537.4              | 67 | √ <sup>e</sup> |
| 31 | C31 | 4-ClC <sub>6</sub> H <sub>4</sub>  | 2MCBs | <b>B01C31E06</b> | 73 | 559.09 | nd   | nd                 | nd | no             |
| 32 | C32 | 1-Me-2-pyrrole                     | Ts    | <b>B01C32E06</b> | 33 | 484.15 | nd   | nd                 | nd | no             |
| 33 | C33 | 3-MeC <sub>6</sub> H <sub>4</sub>  | Ts    | <b>B01C33E06</b> | 86 | 495.15 | 4.53 | 518.0              | 42 | no             |
| 34 | C34 | 4-MeOC <sub>6</sub> H <sub>4</sub> | 2MCBs | <b>B01C34E06</b> | 64 | 555.14 | nd   | nd                 | nd | no             |
| 35 | C35 | 4-MeOC <sub>6</sub> H <sub>4</sub> | Bs    | <b>B01C35E06</b> | 72 | 497.13 | 4.26 | 520.0              | 92 | √              |
| 36 | C36 | 4-MeC <sub>6</sub> H <sub>4</sub>  | 2Ns   | <b>B01C36E06</b> | 51 | 526.12 | nd   | nd                 | nd | no             |
| 37 | C37 | 4-MeOC <sub>6</sub> H <sub>4</sub> | 4ClBs | <b>B01C37E06</b> | 91 | 531.09 | 4.46 | 553.0              | 66 | √ <sup>e</sup> |
| 38 | C38 | 4-MeOC <sub>6</sub> H <sub>4</sub> | 2Ts   | <b>B01C38E06</b> | 69 | 511.15 | 4.41 | 534.1              | 59 | √ <sup>e</sup> |
| 39 | C39 | 3-MeOC <sub>6</sub> H <sub>4</sub> | Ts    | <b>B01C39E06</b> | 69 | 511.15 | 4.36 | 534.1              | 81 | √              |
| 40 | C40 | 4-ClC <sub>6</sub> H <sub>4</sub>  | 2Ts   | <b>B01C40E06</b> | 70 | 515.10 | 4.62 | 516.1 <sup>d</sup> | 44 | √ <sup>e</sup> |
| 41 | C41 | 4-MeC <sub>6</sub> H <sub>4</sub>  | 2Ts   | <b>B01C41E06</b> | 71 | 495.15 | 4.58 | 518.0              | 79 | √              |
| 42 | C42 | 4-MeC <sub>6</sub> H <sub>4</sub>  | 2MCBs | <b>B01C42E06</b> | 84 | 539.14 | nd   | nd                 | nd | no             |
| 43 | C43 | 4-MeC <sub>6</sub> H <sub>4</sub>  | Bs    | <b>B01C43E06</b> | 68 | 481.14 | 4.39 | 504.1              | 88 | √              |
| 44 | C44 | 4-MeC <sub>6</sub> H <sub>4</sub>  | 4Ns   | <b>B01C44E06</b> | 46 | 526.12 | nd   | nd                 | nd | no             |
| 45 | C45 | 4-MeC <sub>6</sub> H <sub>4</sub>  | 3Ns   | <b>B01C45E06</b> | 28 | 526.12 | nd   | nd                 | nd | no             |
| 46 | C46 | 4-MeC <sub>6</sub> H <sub>4</sub>  | Ms    | <b>B01C46E06</b> | 73 | 419.12 | 3.96 | 442.0              | 51 | √ <sup>e</sup> |

<sup>a</sup> All reactions exhibited conversions >95%. Products all exhibited a diastereoisomeric ratio of 90:10 or better.

<sup>b</sup> Crude yield after cleavage.

<sup>c</sup> Short 6-min method; purity observed at λ 210 nm.

<sup>d</sup> [M + H]<sup>+</sup>

<sup>e</sup> Selection based on <sup>1</sup>H NMR spectrum only.

**Screening Thiols Using Resin-Bound Tetrahydropyridine L-B01C01/02.** The thiols were reacted with lantern-bound tetrahydropyridine **L-B01C01** or **L-B01C02** according to the procedure described on page S24. The analytical data (<sup>1</sup>H NMR and LCMS spectra; see Supporting Information, Part D, for copies of spectra and chromatograms) of the cleaved tetrasubstituted piperidines **B01C01/02E(01–32)** are summarized in Table 13. Based on these results, 17 thiols (of 32) were chosen for inclusion in the library synthesis.

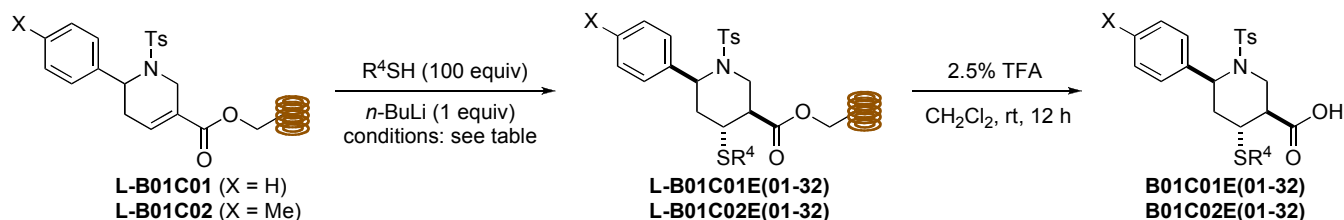

**Table 13.** Thiol **E(01–32)** Screening Using Resin-Bound Tetrahydropyridine **B01C01** or **B01C02**.

| entry | cond. | product                                |                  | NMR   |       |                           | LCMS <sup>b</sup> |                         |                                   |               |       |
|-------|-------|----------------------------------------|------------------|-------|-------|---------------------------|-------------------|-------------------------|-----------------------------------|---------------|-------|
|       |       | R <sup>4</sup>                         | no.              | conv. | d.r.  | yield <sup>d</sup><br>(%) | calcd.<br>[M]     | retention<br>time (min) | observed<br>[M + Na] <sup>+</sup> | purity<br>(%) | incl. |
| 1     | A     | Ph                                     | <b>B01C02E01</b> | >98   | 96:4  | 60                        | 481.14            | 4.50                    | 504.0                             | 95            | √     |
| 2     | A     | <i>p</i> -tolyl                        | <b>B01C01E02</b> | >98   | 96:4  | 47                        | 495.17            | 4.67                    | 496.1 <sup>c</sup>                | 91            | √     |
| 3     | A     | 3,4-di-MeC <sub>6</sub> H <sub>3</sub> | <b>B01C01E03</b> | >98   | 88:12 | 54                        | 495.15            | nd                      | nd                                | nd            | no    |
| 4     | A     | 4-MeOC <sub>6</sub> H <sub>4</sub>     | <b>B01C02E04</b> | >98   | 93:7  | 42                        | 511.15            | 4.49                    | 534.1                             | 87            | √     |
| 5     | A     | 4-ClC <sub>6</sub> H <sub>4</sub>      | <b>B01C02E05</b> | >98   | 90:10 | 58                        | 515.10            | 4.71                    | 538.0                             | 99            | √     |
| 6     | B     | Bn                                     | <b>B01C02E06</b> | 99    | 93:7  | 89                        | 495.15            | 4.51                    | 518.1                             | 96            | √     |
| 7     | E     | 4- <i>t</i> -butylbenzyl               | <b>B01C02E07</b> | 99    | 89:11 | 95                        | 551.22            | 5.00                    | 574.0                             | 97            | √     |
| 8     | B     | 4-fluorobenzyl                         | <b>B01C01E08</b> | 96    | 93:7  | 57                        | 499.13            | nd                      | nd                                | nd            | no    |
| 9     | B     | 4-chlorobenzyl                         | <b>B01C02E09</b> | >98   | 94:6  | 57                        | 529.11            | 4.69                    | 552.0                             | 92            | √     |
| 10    | B     | 2-chlorobenzyl                         | <b>B01C01E10</b> | >98   | 93:7  | 58                        | 515.10            | nd                      | nd                                | nd            | no    |
| 11    | B     | 4-bromobenzyl                          | <b>B01C01E11</b> | >98   | 93:7  | 67                        | 559.05            | nd                      | nd                                | nd            | no    |
| 12    | B     | 4-methoxybenzyl                        | <b>B01C01E12</b> | 95    | 92:8  | 64                        | 511.15            | nd                      | nd                                | nd            | no    |

|    |   |                                                             |                  |     |       |    |        |      |       |    |                |
|----|---|-------------------------------------------------------------|------------------|-----|-------|----|--------|------|-------|----|----------------|
| 13 | A | 2-naphthyl                                                  | <b>B01C01E13</b> | >98 | 91:9  | 35 | 517.14 | nd   | nd    | nd | no             |
| 14 | B | 2-furanyl                                                   | <b>B01C01E14</b> | >98 | nd    | 23 | 471.12 | nd   | nd    | nd | no             |
| 15 | C | phenethyl                                                   | <b>B01C02E15</b> | >98 | 93:7  | 77 | 509.17 | 4.61 | 532.1 | 83 | √              |
| 16 | C | ethyl                                                       | <b>B01C02E16</b> | 98  | 94:6  | 71 | 433.14 | 4.26 | 456.1 | 72 | √              |
| 17 | E | <i>i</i> -propyl                                            | <b>B01C01E17</b> | 70  | 89:11 | 74 | 433.14 | nd   | nd    | nd | no             |
| 18 | C | <i>n</i> -propyl                                            | <b>B01C02E18</b> | 96  | 95:5  | 76 | 447.15 | 4.42 | 470.1 | 55 | √ <sup>d</sup> |
| 19 | D | <i>t</i> -butyl                                             | <b>B01C01E19</b> | 0   | nd    | 0  | 447.15 | nd   | nd    | nd | no             |
| 20 | D | 2-butanyl                                                   | <b>B01C01E20</b> | 81  | 88:12 | 10 | 447.15 | nd   | nd    | nd | no             |
| 21 | E | isobutyl                                                    | <b>B01C02E21</b> | 97  | 93:7  | 71 | 461.17 | 4.55 | 484.1 | 99 | √              |
| 22 | D | <i>n</i> -butyl                                             | <b>B01C02E22</b> | 95  | 93:7  | 76 | 461.17 | 4.62 | 484.1 | 83 | √              |
| 23 | F | isoamyl                                                     | <b>B01C02E23</b> | >98 | 97:3  | 50 | 475.19 | 4.74 | 498.2 | 80 | √              |
| 24 | E | <i>n</i> -pentyl                                            | <b>B01C02E24</b> | 86  | 92:8  | 72 | 475.19 | 4.78 | 498.1 | 45 | √ <sup>d</sup> |
| 25 | F | <i>n</i> -hexyl                                             | <b>B01C02E25</b> | 95  | 95:5  | 59 | 489.20 | 4.92 | 512.1 | 88 | √              |
| 26 | D | <i>n</i> -heptyl                                            | <b>B01C01E26</b> | 74  | nd    | nd | 489.20 | nd   | nd    | nd | no             |
| 27 | D | <i>n</i> -decyl                                             | <b>B01C01E27</b> | 69  | nd    | nd | 531.25 | nd   | nd    | nd | no             |
| 28 | F | cyclopentyl                                                 | <b>B01C02E28</b> | 96  | 96:4  | 66 | 473.17 | 4.77 | 496.1 | 87 | √              |
| 29 | F | cyclohexyl                                                  | <b>B01C02E29</b> | 86  | 89:11 | 30 | 487.19 | nd   | nd    | nd | no             |
| 30 | C | allyl                                                       | <b>B01C02E30</b> | 98  | 97:3  | 57 | 445.14 | 4.36 | 468.0 | 99 | √              |
| 31 | C | MeO <sub>2</sub> CCH <sub>2</sub> CH <sub>2</sub>           | <b>B01C02E31</b> | 89  | 83:17 | 83 | 491.14 | nd   | nd    | nd | no             |
| 32 | C | <i>t</i> -BuO <sub>2</sub> CCH <sub>2</sub> CH <sub>2</sub> | <b>B01C02E32</b> | 95  | 89:11 | 69 | 533.19 | nd   | nd    | nd | no             |

<sup>a</sup> Crude yield after cleavage.

<sup>b</sup> Short 6-min method; purity observed at λ 210 nm.

<sup>c</sup> [M + H]<sup>+</sup>

<sup>d</sup> Selection based on <sup>1</sup>H NMR spectrum only.

## Experimental Procedures for the Library Tagging and the Split-Pool Library Synthesis

**Tagging of the Building Blocks.** The individual lanterns were tagged with colored spindles and cogs to encode the building blocks used for each lantern. Tables 14–16 summarize the colors of the spindles and cogs used to encode the allenic acid and imine building blocks. Because the thiol Michael addition was the last step of the synthesis, tagging for thiols was not necessary. The [3 + 2] and [4 + 2] annulation-based parts of the library were never pooled together. Consequently, there are overlaps of the colors of the spindles and cogs encoding the allenic acids.

**Table 14.** Tagging for the γ-Substituted Allenic Acids **A(02–11)**.

| entry | R                 | allenic acid | spindle          |
|-------|-------------------|--------------|------------------|
| 1     | methyl            | <b>A02</b>   | black            |
| 2     | <i>t</i> -butyl   | <b>A03</b>   | red <sup>a</sup> |
| 3     | phenyl            | <b>A04</b>   | none             |
| 4     | ethyl             | <b>A05</b>   | red <sup>a</sup> |
| 5     | isopropyl         | <b>A06</b>   | yellow           |
| 6     | <i>n</i> -propyl  | <b>A07</b>   | green            |
| 7     | <i>n</i> -butyl   | <b>A08</b>   | blue             |
| 8     | <i>n</i> -pentyl  | <b>A09</b>   | natural          |
| 9     | <i>n</i> -hexyl   | <b>A10</b>   | brown            |
| 10    | cyclopentylmethyl | <b>A11</b>   | white            |

<sup>a</sup> The lanterns loaded with **A03** had only red spindles inserted (no cogs to encode imines) because the dihydropyrrole annulation products with **A03** were not pooled with the other annulation products for the thiol 1,4-addition. On the other hand, lanterns loaded with **A05** had red spindles and cogs that encode for imines.

**Table 15.** Tagging for the α-Substituted Allenic Acid Building Blocks **B(02–12)**.

| entry | R <sup>1</sup>                    | allenic acid | spindle | cog |
|-------|-----------------------------------|--------------|---------|-----|
| 1     | Ph                                | <b>B02</b>   | –       | –   |
| 2     | 2-F-C <sub>6</sub> H <sub>4</sub> | <b>B03</b>   | white   | –   |

|    |                                               |            |         |      |
|----|-----------------------------------------------|------------|---------|------|
| 3  | 3-F-C <sub>6</sub> H <sub>4</sub>             | <b>B04</b> | yellow  | –    |
| 4  | 3-Cl-C <sub>6</sub> H <sub>4</sub>            | <b>B05</b> | red     | –    |
| 5  | 3-Br-C <sub>6</sub> H <sub>4</sub>            | <b>B06</b> | blue    | –    |
| 6  | 3-Me-C <sub>6</sub> H <sub>4</sub>            | <b>B07</b> | green   | –    |
| 7  | 4-F-C <sub>6</sub> H <sub>4</sub>             | <b>B08</b> | brown   | –    |
| 8  | 4-Cl-C <sub>6</sub> H <sub>4</sub>            | <b>B09</b> | black   | –    |
| 9  | 4-Br-C <sub>6</sub> H <sub>4</sub>            | <b>B10</b> | natural | –    |
| 10 | 4-Me-C <sub>6</sub> H <sub>4</sub>            | <b>B11</b> | white   | red  |
| 11 | 4- <i>t</i> -Bu-C <sub>6</sub> H <sub>4</sub> | <b>B12</b> | white   | blue |

**Table 16.** Tagging for the Imines **C(01–46)** Used in the [3 + 2] and [4 + 2] Annulations.

| entry | Ar                                               | R <sup>2</sup>                 | imine      | color of cog   |
|-------|--------------------------------------------------|--------------------------------|------------|----------------|
| 1     | Ph                                               | <i>p</i> -tolyl                | <b>C01</b> | red            |
| 2     | 4-MeC <sub>6</sub> H <sub>4</sub>                | <i>p</i> -tolyl                | <b>C02</b> | yellow         |
| 3     | 4-EtC <sub>6</sub> H <sub>4</sub>                | <i>p</i> -tolyl                | <b>C03</b> | blue           |
| 4     | 4-MeOC <sub>6</sub> H <sub>4</sub>               | <i>p</i> -tolyl                | <b>C04</b> | red/green      |
| 5     | 4-EtOC <sub>6</sub> H <sub>4</sub>               | <i>p</i> -tolyl                | <b>C05</b> | yellow/white   |
| 6     | piperonal                                        | <i>p</i> -tolyl                | <b>C06</b> | green          |
| 7     | 4-Me <sub>2</sub> NC <sub>6</sub> H <sub>4</sub> | <i>p</i> -tolyl                | <b>C07</b> | –              |
| 8     | 4-Et <sub>2</sub> NC <sub>6</sub> H <sub>4</sub> | <i>p</i> -tolyl                | <b>C08</b> | –              |
| 9     | 4-NCC <sub>6</sub> H <sub>4</sub>                | <i>p</i> -tolyl                | <b>C09</b> | white          |
| 10    | 2-FC <sub>6</sub> H <sub>4</sub>                 | <i>p</i> -tolyl                | <b>C10</b> | natural        |
| 11    | 4-ClC <sub>6</sub> H <sub>4</sub>                | <i>p</i> -tolyl                | <b>C11</b> | brown          |
| 12    | 3-ClC <sub>6</sub> H <sub>4</sub>                | <i>p</i> -tolyl                | <b>C12</b> | black          |
| 13    | 3,4-ClC <sub>6</sub> H <sub>4</sub>              | <i>p</i> -tolyl                | <b>C13</b> | red/yellow     |
| 14    | 4-BrC <sub>6</sub> H <sub>4</sub>                | <i>p</i> -tolyl                | <b>C14</b> | yellow/blue    |
| 15    | 3-BrC <sub>6</sub> H <sub>4</sub>                | <i>p</i> -tolyl                | <b>C15</b> | blue/natural   |
| 16    | 1-naphthyl                                       | <i>p</i> -tolyl                | <b>C16</b> | blue/green     |
| 17    | 2-furyl                                          | <i>p</i> -tolyl                | <b>C17</b> | –              |
| 18    | Ph                                               | <i>p</i> -NO <sub>2</sub> Ph   | <b>C18</b> | –              |
| 19    | Ph                                               | Me                             | <b>C19</b> | green/white    |
| 20    | 3,4-MeOC <sub>6</sub> H <sub>4</sub>             | <i>p</i> -tolyl                | <b>C20</b> | white/natural  |
| 21    | 2-thiophenyl                                     | <i>p</i> -tolyl                | <b>C21</b> | green/brown    |
| 22    | 4-Me-2-furyl                                     | <i>p</i> -tolyl                | <b>C22</b> | –              |
| 23    | 4-FC <sub>6</sub> H <sub>4</sub>                 | <i>p</i> -tolyl                | <b>C23</b> | natural/brown  |
| 24    | 4- <i>i</i> -PrC <sub>6</sub> H <sub>4</sub>     | <i>p</i> -tolyl                | <b>C24</b> | brown/black    |
| 25    | 3,4,5-MeOC <sub>6</sub> H <sub>4</sub>           | <i>p</i> -tolyl                | <b>C25</b> | white/black    |
| 26    | 3-FC <sub>6</sub> H <sub>4</sub>                 | <i>p</i> -tolyl                | <b>C26</b> | black/red      |
| 27    | 4-ClC <sub>6</sub> H <sub>4</sub>                | <i>p</i> -ClPh                 | <b>C27</b> | red/blue       |
| 28    | 4-ClC <sub>6</sub> H <sub>4</sub>                | Me                             | <b>C28</b> | –              |
| 29    | 4-ClC <sub>6</sub> H <sub>4</sub>                | <i>o</i> -CO <sub>2</sub> MePh | <b>C29</b> | yellow/green   |
| 30    | 4-MeC <sub>6</sub> H <sub>4</sub>                | <i>p</i> -ClPh                 | <b>C30</b> | blue/white     |
| 31    | 4-ClC <sub>6</sub> H <sub>4</sub>                | <i>o</i> -MeOPh                | <b>C31</b> | –              |
| 32    | 1-methylpyrrolyl                                 | <i>p</i> -tolyl                | <b>C32</b> | –              |
| 33    | 3-MeC <sub>6</sub> H <sub>4</sub>                | <i>p</i> -tolyl                | <b>C33</b> | green/natural  |
| 34    | 4-MeOC <sub>6</sub> H <sub>4</sub>               | <i>o</i> -MePh                 | <b>C34</b> | black/blue     |
| 35    | 4-MeOC <sub>6</sub> H <sub>4</sub>               | Ph                             | <b>C35</b> | red/white      |
| 36    | 4-MeC <sub>6</sub> H <sub>4</sub>                | <i>o</i> -NO <sub>2</sub> Ph   | <b>C36</b> | yellow/natural |
| 37    | 4-MeOC <sub>6</sub> H <sub>4</sub>               | <i>p</i> -ClPh                 | <b>C37</b> | blue/brown     |

|    |                                    |                              |            |                |
|----|------------------------------------|------------------------------|------------|----------------|
| 38 | 4-MeOC <sub>6</sub> H <sub>4</sub> | <i>o</i> -tolyl              | <b>C38</b> | green/black    |
| 39 | 3-MeOC <sub>6</sub> H <sub>4</sub> | <i>p</i> -tolyl              | <b>C39</b> | white/red      |
| 40 | 4-ClC <sub>6</sub> H <sub>4</sub>  | <i>o</i> -tolyl              | <b>C40</b> | white/brown    |
| 41 | 4-MeC <sub>6</sub> H <sub>4</sub>  | <i>o</i> -tolyl              | <b>C41</b> | natural/black  |
| 42 | 4-MeC <sub>6</sub> H <sub>4</sub>  | <i>o</i> -MeOPh              | <b>C42</b> | natural/yellow |
| 43 | 4-MeC <sub>6</sub> H <sub>4</sub>  | Ph                           | <b>C43</b> | brown/red      |
| 44 | 4-MeC <sub>6</sub> H <sub>4</sub>  | <i>p</i> -NO <sub>2</sub> Ph | <b>C44</b> | –              |
| 45 | 4-MeC <sub>6</sub> H <sub>4</sub>  | <i>m</i> -NO <sub>2</sub> Ph | <b>C45</b> | –              |
| 46 | 4-MeC <sub>6</sub> H <sub>4</sub>  | Me                           | <b>C46</b> | black/yellow   |

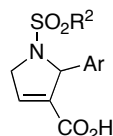

**A01C(01-46)**

**Library Synthesis of 30 A01C(01–46).** The thirty annulation products selected as indicated in Table 3 constituted the final members of the library.

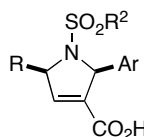

**A(02-04)C(01-46)**

**Library Synthesis of 63 A(02–04)C(01–46).** As described in the general procedure for the loading of  $\gamma$ -substituted allenic acids, each acid was loaded as follows: 21 lanterns (0.315 mmol) were reacted with 2-chloro-1-methylpyridinium iodide (0.805 g, 3.15 mmol) and 4-substituted buta-2,3-dienoic acid (**A02**, 0.309 g, 3.15 mmol; **A03**, 0.442 g, 3.15 mmol, **A04**, 0.505 g, 3.15 mmol) in the presence of diisopropylethylamine (1.10 mL, 6.3 mmol). After washing, the lanterns were split into 21 vials (three lanterns per vial), corresponding to the 21 selected imines. Following the general procedure for annulation, these lanterns were reacted with the appropriate imine in the presence of PBU<sub>3</sub>. When the reaction was complete, the lanterns were washed as described in the general procedure, cleaved, and arrayed into 96-well plates.

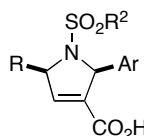

**A(05-11)C(01-46)**

**Library Synthesis of 147 A(05–11)C(01–46)**

**Loading of Acids.** Following the general procedure for the loading of  $\gamma$ -substituted allenic acids, 500 tagged lanterns (7.5 mmol) for each acid [**A05** (8.41 g); **A06** (9.46 g); **A07** (9.46 g); **A08** (10.51 g); **A09** (11.57 g); **A10** (12.62g); **A11** (12.47 g)] were placed into an oven-dried 500-mL round-bottom flask. The lanterns were washed with CH<sub>2</sub>Cl<sub>2</sub> three times and subsequently rinsed with dry CH<sub>2</sub>Cl<sub>2</sub> (1 $\times$ ). 2-Chloro-1-methylpyridinium iodide (19.16 g, 75 mmol) was added, followed by two evacuation/backfill cycles with Ar. A mixture of the 4-substituted 2,3-butadienoic acid and the tautomeric 3-alkynoic acid (75 mmol) was added into the corresponding flasks and dry CH<sub>2</sub>Cl<sub>2</sub> (250 mL) was added to dissolve the solids. The lanterns were soaked in CH<sub>2</sub>Cl<sub>2</sub> for 30 min. The flasks were then cooled to –78 °C and diisopropylethylamine (26.1 mL, 150 mmol) was added under an Ar atmosphere. After 1 h, the cooling bath was removed and the flasks were flushed with Ar and shaken at room temperature overnight.

**Washing and Splitting.** The brown solution was removed and the lanterns were washed as follows: THF (5 $\times$ ), DMF (5 $\times$ ), THF (5 $\times$ ), DMF (5 $\times$ ), THF (5 $\times$ ), CH<sub>2</sub>Cl<sub>2</sub> (5 $\times$ ), THF (5 $\times$ ), CH<sub>2</sub>Cl<sub>2</sub> (5 $\times$ ), THF (5 $\times$ ), CH<sub>2</sub>Cl<sub>2</sub> (5 $\times$ ). (Note: Lanterns were soaked for at least 15 min before changing solvents.) The lanterns were washed

further with THF (5×), CH<sub>2</sub>Cl<sub>2</sub> (5×), and toluene (5×) and then they were split into 25 250-mL round-bottom flasks according to the color combination of their cogs.

**[3 + 2] Cycloaddition of Lantern-Bound 4-Substituted 2,3-Butadienoates L-A(05–11).** For each of the 25 imines, 140 lantern-bound 4-substituted 2,3-butadienoates (15 μmol/lantern) in a 250-mL round-bottom flask were washed under Ar with dry THF (1 mL/lantern, 5 times) and dry benzene (1 mL/lantern, 5 times). The imine (5 equiv) was added followed by 0.5 equiv of tributylphosphine. The mixture was agitated manually and heated at 60 °C for 5 days. The reaction solution was then removed and the lanterns were washed as follows: toluene, CH<sub>2</sub>Cl<sub>2</sub> (5×), THF (5×), DMF (5×), THF (5×), DMF (5×), THF (5×), toluene, THF (5×), and then left in toluene overnight at 60 °C. Further washing with toluene (5×), THF (5×), DMF (5×), THF (5×), and then left in DMF at 60 °C for 4 h; THF (5×), DMF (5×), THF (5×), DMF, NH<sub>4</sub>Cl/H<sub>2</sub>O, THF/H<sub>2</sub>O, CH<sub>2</sub>Cl<sub>2</sub> (5×), toluene, THF (5×), CH<sub>2</sub>Cl<sub>2</sub> (5×), THF (5×), CH<sub>2</sub>Cl<sub>2</sub> (5×), THF (5×), CH<sub>2</sub>Cl<sub>2</sub> (5×), and then left in CH<sub>2</sub>Cl<sub>2</sub> for 1 h. (Note: Lanterns were soaked for at least 15 min before changing solvents.) A selection of 147 lanterns were set aside for the cleavage and arraying into 96-well plates.

**Washing and Splitting.** The lanterns used for the Michael addition were further washed as follows: THF (5×), DMF (5×), THF (5×), DMF (5×), THF (5×), DMF (5×), THF (5×), CH<sub>2</sub>Cl<sub>2</sub> (5×), THF (5×), CH<sub>2</sub>Cl<sub>2</sub> (5×), THF (5×), CH<sub>2</sub>Cl<sub>2</sub> (5×). (Note: Lanterns were soaked for at least 15 min before changing solvents.) The lanterns were further washed with THF (5×), CH<sub>2</sub>Cl<sub>2</sub> (5×), and toluene (5×), and were split into 19 250-mL and 12 100-mL round-bottom flasks according to the color combination of their spindles and cogs for the next split step. The lanterns that reacted with the seven thiols **E01**, **E06**, **E07**, **E16**, **E25**, **E30**, and **E32** (conditions **A** on page S22) were all combined in one flask. The lanterns that were treated with the 12 thiols **E02**, **E04**, **E17**, **E18**, **E19**, **E20**, **E21**, **E22**, **E23**, **E24**, **E28**, and **E29** were divided into a 250-mL flask (for annulation products formed with imines **C02**, **C04**, **C05**, **C06**, **C11**, **C12**, **C13**, **C14**, **C16**, **C20**, **C23**, **C25**, **C29**, **C30**, **C33**, **C35**, **C40**, **C41**; conditions **B**) and a 100-mL flask (for annulation products formed with imines **C01**, **C03**, **C09**, **C10**, **C24**, **C27**; conditions **A**).

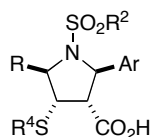

**A(05-11)C(01-46)E(01-32)**

**Library Synthesis of 3,325 A(05–11)C(01–46)E(01–32).** Lantern-bound dihydropyrroles **L-A(05–11)C(01–46)** (15 μmol/lantern) were washed under Ar with dry THF (1 mL/lantern, 5 times). The thiol (100 equiv) was added to the lanterns in THF (0.5 mL/lantern) followed by *n*-BuLi (6 or 10 equiv, 1.6 M in hexanes). The mixture was agitated manually at –25 °C for 10 days. The reaction solution was then removed and the lanterns were washed as follows: THF (5×), toluene, CH<sub>2</sub>Cl<sub>2</sub> (5×), THF (5×), DMF (5×), THF (5×), DMF (5×), THF (5×), DMF (5×), THF (5×), toluene, and THF (5×). Further washing with THF (5×), CH<sub>2</sub>Cl<sub>2</sub> (5×), THF (5×), CH<sub>2</sub>Cl<sub>2</sub> (5×) THF (5×), CH<sub>2</sub>Cl<sub>2</sub> (5×), and then left in CH<sub>2</sub>Cl<sub>2</sub> for at least 1 h. When the washing was complete, the lanterns were cleaved according to the general procedure and arrayed into 96-well plates.

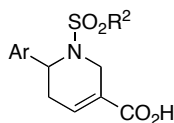

**B01C(01-46)**

**Library Synthesis of 25 B01C(01–46).** According to Table 16, 382 L-series lanterns were tagged (natural spindle was used for **B01**). Following the general procedure for the loading described earlier, these 382 lanterns (5.73 mmol) were reacted with 2-chloro-1-methylpyridinium iodide (14.7 g, 57.3 mmol) and 2-methyl-but-2,3-dienoic acid (**B01**, 5.63 g, 57.3 mmol) in the presence of Et<sub>3</sub>N (16.0 mL, 115 mmol). After washing, the lanterns were split into 28 vials, according to the selected imines with which they were to react. Following the general procedure for annulation, these lanterns were reacted with the appropriate imine in the presence of PBu<sub>3</sub> in CH<sub>2</sub>Cl<sub>2</sub> at room temperature. After the reaction was complete and the washing performed, the 25 annulation products selected were set aside to be cleaved and arrayed into 96-well plates.

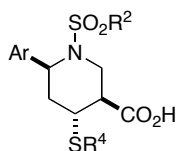

**B01C(01-46)E(01-32)**

**Library Synthesis of 357 B01C(01-46)E(01-32).** A set of 17 vials, corresponding to the 17 thiols to be used in the 1,4 addition, were dried and placed under Ar. No tagging was required for the thiols used. Into each of these vials, 21 lanterns of the different annulation products **B01C(01-46)** selected to undergo the 1,4-addition of thiols were pooled and reacted with the thiols according to the method outlined in the general procedure. Please note the different conditions (A–F) used for the different thiols. After the washing protocol was complete, the 357 lanterns, each containing a different product, were split and cleaved according to the general procedure and subsequently arrayed into 96-well plates.

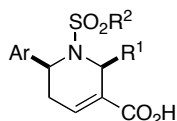

**B(02-12)C(01-46)**

**Library Synthesis of 341 B(02-12)C(01-46).** According to Table 15, 31 lanterns were tagged for each of the 11 allenic acids (total number of lanterns was 341). A set of 11 vials was dried, flushed with Ar, and charged with the 31 lanterns. The loading with each of the allenic acids took place according to the general procedure. After washing, the lanterns were pooled and split again into 31 vials corresponding to the 31 imines selected for the annulation with these lantern-bound  $\alpha$ -benzyl allenates. Each vial contained a lantern for each allenic acid (11 in total). For these series, no separate tagging occurred for the imines. The annulation was performed following the general procedure; after washing, the 341 lanterns, each containing a distinct annulation product, were split, cleaved, and arrayed into 96-well plates.

**Global Cleavage and Arraying into 96-Well Plates as 10 mM DMSO Stock Solutions.** The 4288 lanterns were inserted into 4288 vials and treated with 2.5% TFA in  $\text{CH}_2\text{Cl}_2$  for 12 h. The lanterns were then removed and rinsed with  $\text{CH}_2\text{Cl}_2$ . The resulting solution was concentrated and further co-evaporated with  $\text{CHCl}_3$  to effectively remove TFA. The cleaved compounds were weighed and redissolved in  $\text{CHCl}_3$ ; a portion (2  $\mu\text{mol}$ ) of each compound was transferred to 54 96-well plates (80 compounds per well; two columns of wells in each plate were left empty to accommodate controls in subsequent assays) and the solvents were left to evaporate. The products were redissolved in DMSO and analyzed in the biochemical enzymatic assay for activity against GGTase I.

**LCMS Data for Randomly Selected Library Products.** Out of 4288 library compounds, 121 compounds were randomly selected and analyzed by LCMS for their identity and purity; 107 (of 121; 88%) compounds indicated the correct identity and 79 compounds (65%) demonstrated >70% purity (UV210).

**Table 17.** Random Selection of Library Products With the Corresponding LCMS Data.<sup>a</sup>

| entry | product label | calcd [M] | retention time (min) | observed [M + H] <sup>+</sup> | purity (%) |
|-------|---------------|-----------|----------------------|-------------------------------|------------|
| 1     | A04C11        | 453.08    | 4.252                | 454.0                         | 100        |
| 2     | A03C11        | 433.11    | 4.462                | 434.0                         | 100        |
| 3     | A10C11        | 461.14    | 4.795                | 462.0                         | 100        |
| 4     | A03C13        | 467.07    | 4.651                | 468.0                         | 90         |
| 5     | A06C01        | 385.15    | 4.041                | 408.1 <sup>b</sup>            | 87         |
| 6     | A06C09        | 410.13    | 4.042                | 411.1                         | 84         |
| 7     | A08C11        | 433.11    | 4.446                | 434.1                         | 76         |
| 8     | A03C20        | 459.17    | 4.003                | 460.1                         | 70         |
| 9     | A07C09        | 410.13    | 4.034                | 411.1                         | 95         |
| 10    | A08C09        | 424.15    | 3.731                | 446.1 <sup>b</sup>            | 78         |
| 11    | A09C09        | 438.16    | 4.377                | 439.1                         | 76         |
| 12    | A07C13E01     | 563.08    | 4.776                | 564.1                         | 80         |
| 13    | A05C13E01     | 549.06    | 4.646                | 550.1                         | 82         |

|    |                  |        |       |                    |     |
|----|------------------|--------|-------|--------------------|-----|
| 14 | <b>A05C14E01</b> | 559.05 | 4.538 | 560.0              | 92  |
| 15 | <b>A06C09E01</b> | 520.15 | 4.384 | 521.2              | 82  |
| 16 | <b>A06C11E01</b> | 529.11 | 4.61  | 530.1              | 88  |
| 17 | <b>A07C11E01</b> | 529.11 | 4.627 | 530.1              | 90  |
| 18 | <b>A07C14E01</b> | 573.06 | 4.67  | 574.1              | 84  |
| 19 | <b>A08C09E01</b> | 534.16 | 4.564 | 535.2              | 79  |
| 20 | <b>A08C13E01</b> | 577.09 | 4.926 | 600.1 <sup>b</sup> | 90  |
| 21 | <b>A09C11E01</b> | 557.15 | 4.916 | –                  | 80  |
| 22 | <b>A05C11E01</b> | 515.1  | 4.488 | –                  | 75  |
| 23 | <b>A06C09E04</b> | 550.16 | 4.322 | –                  | 92  |
| 24 | <b>A06C11E04</b> | 559.13 | 4.591 | 560.1              | 74  |
| 25 | <b>A06C14E04</b> | 603.07 | 4.638 | 604.1              | 87  |
| 26 | <b>A06C23E04</b> | 543.15 | 4.474 | 544.2              | 82  |
| 27 | <b>A05C16E18</b> | 497.17 | 4.428 | 498.1              | 90  |
| 28 | <b>A05C06E01</b> | 525.13 | 4.345 | 526.1              | 80  |
| 29 | <b>A05C14E02</b> | 573.06 | 4.669 | 574.1              | 100 |
| 30 | <b>A05C13E02</b> | 563.08 | 4.787 | –                  | 92  |
| 31 | <b>A05C09E01</b> | 506.13 | 4.276 | 507.1              | 71  |
| 32 | <b>A05C29E01</b> | 501.08 | 4.525 | –                  | 85  |
| 33 | <b>A09C11E19</b> | 537.18 | 4.957 | 538.2              | 100 |
| 34 | <b>A08C14E01</b> | 587.08 | 4.815 | 588.1              | 66  |
| 35 | <b>A05C11E04</b> | 545.11 | 4.491 | 546.               | 71  |
| 36 | <b>A06C13E01</b> | 563.08 | 4.78  | 564.0              | 83  |
| 37 | <b>A06C11E18</b> | 495.13 | 4.617 | 496.1              | 70  |
| 38 | <b>A06C09E28</b> | 512.18 | 4.709 | –                  | 80  |
| 39 | <b>A07C11E29</b> | 535.16 | 4.489 | 535.2              | 77  |
| 40 | <b>A07C03E28</b> | 515.22 | 4.579 | 516.0              | 86  |
| 41 | <b>A05C23E29</b> | 505.18 | 4.548 | 506.2              | 84  |
| 42 | <b>A06C09E29</b> | 527.2  | 4.623 | 528.5              | 93  |
| 43 | <b>A06C11E32</b> | 581.17 | 4.731 | 604.0 <sup>b</sup> | 89  |
| 44 | <b>A06C14E32</b> | 625.12 | 4.771 | 648.0 <sup>b</sup> | 79  |
| 45 | <b>A06C16E16</b> | 497.17 | 4.424 | 498.2              | 81  |
| 46 | <b>A05C14E16</b> | 511.05 | 4.348 | 512.0              | 91  |
| 47 | <b>A05C04E01</b> | 463.15 | 4.081 | 464.1              | 77  |
| 48 | <b>A06C09E17</b> | 486.16 | 4.3   | 487.1              | 70  |
| 49 | <b>A06C10E17</b> | 479.16 | 4.335 | 480.1              | 73  |
| 50 | <b>A05C05E01</b> | 524.16 | 3.942 | 524.2              | 83  |
| 51 | <b>A06C09E23</b> | 514.2  | 4.602 | 515.2              | 83  |
| 52 | <b>A08C09E20</b> | 514.2  | 4.621 | 537.4 <sup>b</sup> | 63  |
| 53 | <b>A05C11E20</b> | 495.13 | 4.541 | 496.1              | 71  |
| 54 | <b>A07C14E32</b> | 625.12 | 4.488 | 625.4              | 76  |
| 55 | <b>A07C03</b>    | 413.17 | 4.355 | 414.1              | 81  |
| 56 | <b>A09C03</b>    | 441.2  | 4.695 | 442.2              | 82  |
| 57 | <b>A10C03</b>    | 455.21 | 4.866 | 478.2 <sup>b</sup> | 84  |
| 58 | <b>A03C01</b>    | 399.15 | 4.223 | 400.1              | 79  |
| 59 | <b>A03C10</b>    | 417.14 | 4.17  | 418.0              | 87  |
| 60 | <b>A03C12</b>    | 433.11 | 4.418 | 456.1 <sup>b</sup> | 83  |
| 61 | <b>A03C26</b>    | 417.14 | 4.287 | 418.0              | 79  |
| 62 | <b>A03C27</b>    | 453.06 | 4.558 | 454.0              | 77  |
| 63 | <b>A03C30</b>    | 433.11 | 4.452 | 456.8 <sup>b</sup> | 93  |
| 64 | <b>A03C41</b>    | 413.17 | 4.415 | 414.1              | 76  |
| 65 | <b>A07C41E01</b> | 509.17 | 4.588 | 510.1              | 48  |
| 66 | <b>A06C14E01</b> | 573.06 | 4.65  | nd                 | 51  |
| 67 | <b>A07C23E01</b> | 513.14 | 4.489 | 514.2              | 51  |
| 69 | <b>A09C13E01</b> | 591.11 | –     | –                  | –   |
| 70 | <b>A09C14E01</b> | 601.1  | –     | –                  | –   |
| 71 | <b>A10C14E01</b> | 615.11 | –     | –                  | –   |
| 72 | <b>A05C21E22</b> | 451.15 | 4.219 | –                  | 42  |
| 73 | <b>A06C14E18</b> | 539.08 | 4.586 | 563.0 <sup>b</sup> | 51  |
| 74 | <b>A08C09E04</b> | 564.18 | 4.509 | 565.2              | 61  |
| 75 | <b>A09C11E25</b> | 565.21 | –     | –                  | –   |

|     |           |        |       |                    |                 |
|-----|-----------|--------|-------|--------------------|-----------------|
| 76  | A10C14E25 | 623.17 | –     | –                  | –               |
| 77  | A08C14E25 | 595.14 | –     | –                  | –               |
| 78  | A08C11E25 | 551.19 | –     | –                  | –               |
| 79  | A07C11E25 | 537.18 | –     | –                  | –               |
| 80  | A06C11E25 | 537.18 | –     | –                  | –               |
| 81  | A05C14E30 | 523.05 | 4.406 | 524.0              | 44              |
| 82  | A09C09E30 | 512.18 | 4.389 | 535.2 <sup>b</sup> | 35              |
| 83  | A09C11E30 | 521.15 | –     | –                  | –               |
| 84  | A10C11E30 | 535.16 | –     | –                  | –               |
| 85  | A05C09E07 | 576.21 | 4.426 | 599.3 <sup>b</sup> | 48              |
| 86  | A09C16E01 | 573.2  | –     | –                  | –               |
| 87  | A09C09E01 | 548.18 | 4.720 | 571.2 <sup>b</sup> | 59              |
| 88  | A09C20E01 | 583.21 | 4.606 | 584.2              | 48              |
| 89  | A10C11E01 | 571.16 | –     | –                  | –               |
| 90  | A10C09E01 | 562.2  | 4.875 | 564.2              | 55              |
| 91  | A11C06E01 | 579.17 | 4.72  | 580.2              | 52              |
| 92  | A11C09E01 | 560.18 | 4.727 | nd                 | 53              |
| 93  | A11C13E01 | 603.11 | –     | –                  | –               |
| 94  | A05C11E07 | 585.18 | –     | –                  | –               |
| 95  | A09C11E16 | 509.15 | –     | –                  | –               |
| 96  | A06C14E17 | 539.08 | 4.575 | 540.0              | 65              |
| 97  | A05C09E16 | 458.13 | 4.064 | 481.1 <sup>b</sup> | 39              |
| 98  | A05C09E17 | 472.15 | 4.179 | 473.1              | 55              |
| 99  | A07C04E19 | 505.2  | 4.467 | nd                 | 57              |
| 100 | A05C11E24 | 509.15 | 4.719 | 510.1              | 54              |
| 101 | A05C09E21 | 486.16 | 4.343 | 487.1              | 50              |
| 102 | A05C30E20 | 495.13 | 4.585 | 496.0              | 59              |
| 103 | A09C35E19 | 519.21 | 4.671 | 520.0              | 56              |
| 104 | A10C09E24 | 556.24 | –     | –                  | –               |
| 105 | A10C14E23 | 609.16 | –     | –                  | –               |
| 106 | A05C13E22 | 529.09 | 4.716 | 530.0              | 38              |
| 107 | B01C04    | 387.11 | 3.783 | 410.1 <sup>b</sup> | 90              |
| 108 | B02C09    | 458.13 | 4.016 | 481.1 <sup>b</sup> | 93              |
| 109 | B04C39    | 481.14 | 4.150 | 504.1 <sup>b</sup> | 91              |
| 110 | B06C05    | 555.07 | 4.433 | 580.0 <sup>b</sup> | 98              |
| 111 | B07C10    | 465.14 | 4.226 | 488.1 <sup>b</sup> | 99              |
| 112 | B08C43    | 451.13 | 4.238 | 474.0 <sup>b</sup> | 98              |
| 113 | B10C26    | 529.04 | 4.372 | 552.0 <sup>b</sup> | 97              |
| 114 | B11C21    | 453.11 | 4.207 | 476.0 <sup>b</sup> | 69              |
| 115 | B12C09    | 514.19 | 4.521 | 537.3 <sup>b</sup> | 99              |
| 116 | B01C01E06 | 481.14 | 4.377 | 504.0 <sup>b</sup> | 78              |
| 117 | B01C01E18 | 433.14 | 4.252 | 456.1 <sup>b</sup> | 56 <sup>c</sup> |
| 118 | B01C02E04 | 511.15 | 4.462 | 534.1 <sup>b</sup> | 70              |
| 119 | B01C03E01 | 495.15 | 4.623 | 518.1 <sup>b</sup> | 87              |
| 120 | B01C30E09 | 549.06 | 4.747 | 572.0 <sup>b</sup> | 57              |
| 121 | B01C35E02 | 497.13 | 4.323 | 520.1 <sup>b</sup> | 90              |

<sup>a</sup> Short 6-min method; purity observed at  $\lambda$  210 nm.

<sup>b</sup> [M + Na]<sup>+</sup>

<sup>c</sup> Major byproduct is the retro-Michael product, formed on the LCMS column. <sup>1</sup>H NMR spectra verified the correct identity of the compounds.

## Bioassays Using 4,288 GGTI Analogs

**Filter Binding Assays to Identify GGTIs With Improved Efficacy and Determination of IC<sub>50</sub>.** The percentage activities of GGTase-I for protein K-Ras4B or RhoA in the presence of the 4288 compounds were determined as follows: We first prepared the working solution that contained each compound in DMSO at a concentration of 1 mM. The working solution was added to the GGTase I reaction mixture so that the final concentration of the compound was 50  $\mu$ M. The GGTase-I activity was assayed by incubating [<sup>3</sup>H]GGPP with K-Ras4B or RhoA protein in the presence of GGTase-I and examining the radioactivity incorporated into the substrate protein by spotting onto a filter paper. After washing with trichloroacetic acid (TCA), ethanol, and acetone, the radioactivity retained on the



filter was determined using a scintillation counter. The GGTase-I activity in the presence of DMSO was taken as a 100% value and the activity in the presence of the compound is presented as a percentage activity relative to the 100% value. Compounds **22** and **23** were identified as the best inhibitors of GGTase I. The dose dependency of the inhibition of the two compounds **22** and **23** is shown in Figure S4. The IC<sub>50</sub> values for the inhibition of GGTase-I using RhoA as a substrate were 0.5 and 0.3 μM for **22** and **23**, respectively.

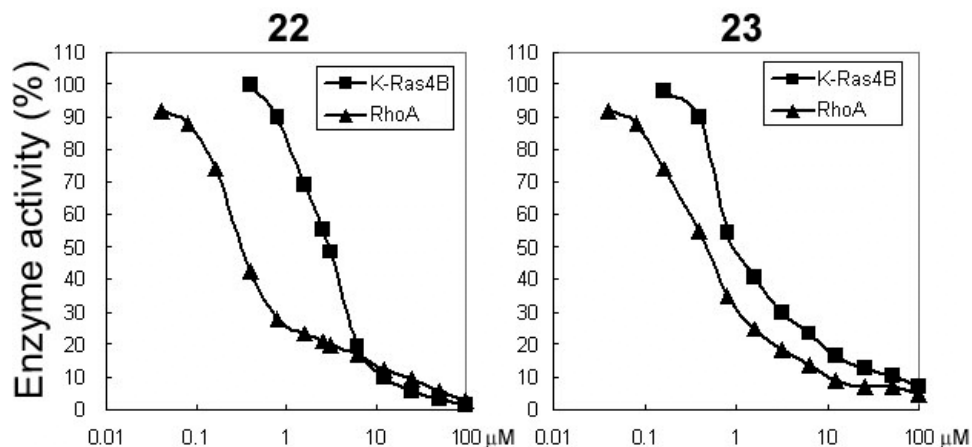

**Figure S4.** Dose dependency of GGTase-I activity in the presence of compounds **22** or **23**.

**Measurement of Specificity.** The specificity of the GGTase-I inhibition by **22** and **23** was examined. As is evident from Figure S5, no inhibition of FTase activity was caused by any of these compounds, even when the concentration was increased to 100 μM. The farnesyltransferase (FTase) inhibitor BMS225975, used as a control, inhibited FTase but did not inhibit GGTase-I. The GGTase-I inhibitor GGTI-298 inhibited GGTase-I, whereas little inhibition was observed with FTase.

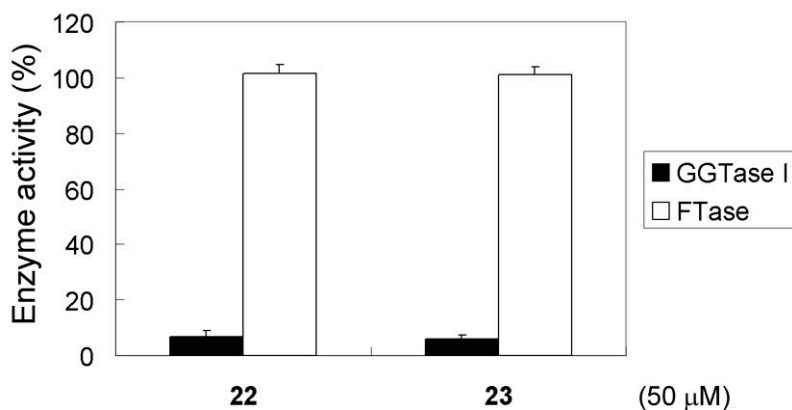

**Figure S5.** Effects of compounds **22** and **23** on the enzymatic activity of GGTase-I (black) and FTase (white). Data represent the mean ± S.D. of measurements from three independent experiments.

**Protein Geranylgeranylation Assay.** Human embryonic kidney-293 (HEK293) cells were transfected with pCDNA3-mycHARheb (M184L) mutant<sup>11</sup> using the Polyfect transfection reagent (Qiagen, Chatsworth, CA). Cells were cultured in DMEM plus 10% (v/v) fetal bovine serum overnight, and then DMSO, GGTI-298 (10 μM; Calbiochem, La Jolla, CA), GGTI-2166 (10 μM; obtained from Dr Said Sebti, University of South Florida),<sup>12</sup> and

<sup>11</sup> Gau, C. L.; Kato-Stankiewicz, J.; Jiang, C.; Miyamoto, S.; Guo, L.; Tamanoi, F. *Mol. Cancer Ther.* **2005**, *4*, 918.

<sup>12</sup> Sun, J.; Blaskovich, M. A.; Knowles, D.; Qian, Y.; Ohkanda, J.; Bailey, R. D.; Hamilton, A. D.; Sebti, S. M. *Cancer Res.* **1999**, *59*, 4919.

compound **22** or **23** (25  $\mu\text{M}$ ) were added. Incubation was continued for 48 h. The cells were harvested and lysed in lysis buffer (20 mM Tris-HCl, pH 7.5, 150 mM NaCl, 1 mM EDTA, 1% NP-40, 1x Protease Inhibitor Cocktail). Lysates (10  $\mu\text{g}$ ) were electrophoresed on a 10% SDS-PAGE, transferred to nitrocellulose membranes and immunoblotted with anti-myc 9B11 antibody (Cell Signaling, Beverly, CA). The descriptors P and U in Figure S6 indicate the processed and unprocessed Rheb, respectively. Data are representative of two independent experiments.

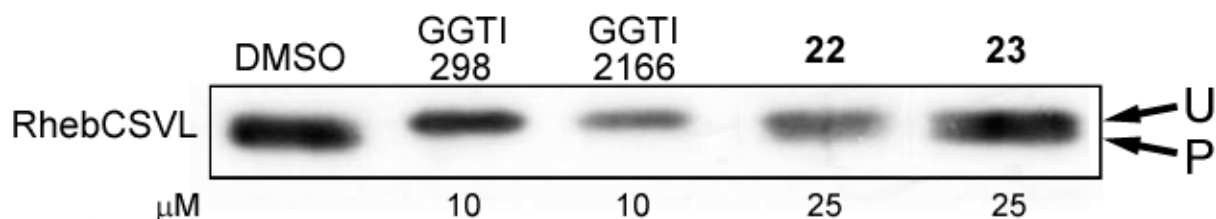

**Figure S6.** Effects of compounds **22** and **23** on Rheb-CVSL processing in HEK293 cells.

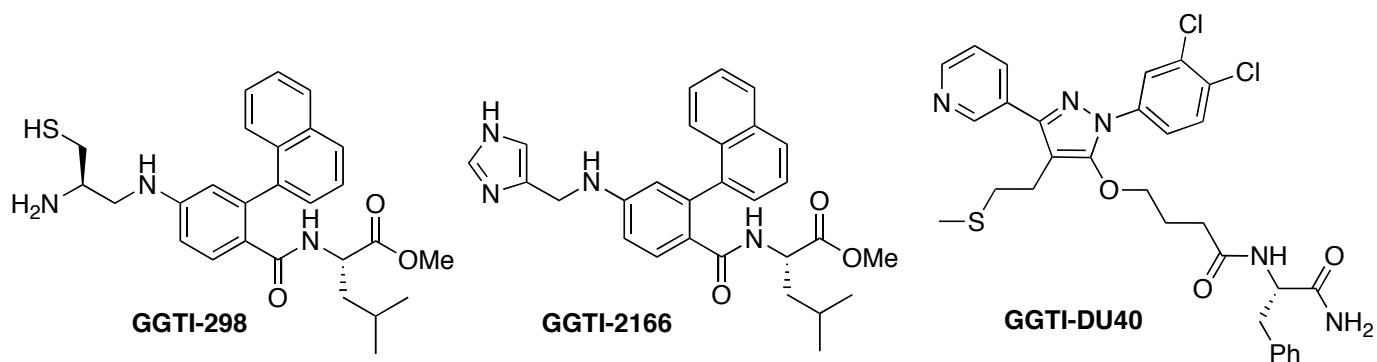

**Figure S7.** Structures of GGTI-298, GGTI-2166, and GGTI-DU40.
